# Supplementary material for: Single-cell transcriptome analysis of avian neural crest migration reveals signatures of invasion and molecular transitions
Source: eLife. 2017 Dec 4;6:e28415. doi: 10.7554/eLife.28415 (PMC5728719; doi:10.7554/eLife.28415)
Supplement: Figure 1—source data 1. — All differential expression thresholds were set at log2 fold-change (FC) greater than 2 or less than −2 and False Discovery Rate (FDR) less than 0.05. Individual pairwise comparisons are displayed as individual tabs within the spreadsheet. [file elife-28415-fig1-data1.xlsx]

## Sheet: List of tabs
List of tabs
Front_15_v_15_Stream_bulk
Front_13_v_13_Stream_bulk
Front_13_v_Front_15_bulk
Stream_13_v_Stream_15_bulk
Front_v_Stream_13and15_overlap

## Sheet: Front_15_v_15_Stream_bulk
geneId	logFC	logCPM	LR	PValue	FDR	Stream_13_2	Stream_13_3	Stream_13_4	Stream_15_1	Stream_15_2	Stream_15_3	Trailblazer_13_2	Trailblazer_13_3	Trailblazer_13_4	Trailblazer_15_1	Trailblazer_15_2	Trailblazer_15_3	Name	Description
ENSGALG00000004582	13.145	5.91058	20.9538	4.70499e-06	0.00125961	-5.67207	-0.159388	-6.62149	-6.32393	-8.80394	-8.80394	-3.33678	5.61316	-8.80394	6.90799	-1.29799	1.8706	MYL2	myosin regulatory light chain 2A, cardiac muscle isoform [Source:RefSeq peptide;Acc:NP_001258858]
ENSGALG00000008635	10.4024	6.94414	23.483	1.26025e-06	0.000470304	-8.61547	4.71785	-2.85822	-8.61547	-5.30335	-2.68959	0.762322	5.94951	6.23456	7.05287	6.5197	4.03212		Uncharacterized protein [Source:UniProtKB/TrEMBL;Acc:F1NLQ7]
ENSGALG00000015935	8.80796	4.26363	20.4167	6.22828e-06	0.00163194	-8.91026	-3.09925	-7.27608	-5.9641	-11.198	-11.198	-3.78846	1.50087	-2.33008	2.80499	-2.39559	-2.97683	SMYD1	SET and MYND domain-containing protein 1 [Source:RefSeq peptide;Acc:NP_989486]
ENSGALG00000028183	8.54472	1.31022	13.3071	0.000264399	0.027134	-7.14167	-3.90839	-7.14167	-4.66167	-7.14167	-7.14167	-1.14417	2.40316	-7.14167	3.99582	-2.39622	-3.7574		Uncharacterized protein [Source:UniProtKB/TrEMBL;Acc:R4GM85]
ENSGALG00000009844	8.03168	6.91976	19.8144	8.53369e-06	0.00210185	-2.19231	-0.621719	-2.43397	-1.33872	-3.019	-2.54364	-0.730649	4.97824	-2.94751	7.47761	0.461451	-1.00624	ACTC1	Actin, alpha cardiac muscle 1 [Source:UniProtKB/Swiss-Prot;Acc:P68034]
ENSGALG00000002118	7.97533	0.418086	21.5306	3.48232e-06	0.00104597	-9.87284	-3.78045	-5.95093	-9.87284	-9.87284	-7.29199	-9.87284	-9.87284	-9.87284	-0.472555	-2.24415	-0.412586	CO6	calcium-activated potassium channel subunit beta-1 [Source:RefSeq peptide;Acc:NP_989933]
ENSGALG00000026787	7.16784	1.75549	36.661	1.40566e-09	2.47296e-06	-6.89313	-1.09543	-2.97122	-4.41312	-4.4426	-4.31228	1.4783	2.75955	2.72495	3.13137	2.61967	1.94897	HAND1	heart- and neural crest derivatives-expressed protein 1 [Source:RefSeq peptide;Acc:NP_990296]
ENSGALG00000015520	6.08501	2.2605	13.4044	0.000251028	0.0259782	-9.66291	-4.91432	-8.41239	-8.6061	-8.63852	-6.78552	-11.9506	-1.12904	-3.28235	-0.329026	-3.76319	-4.06165	TRIM55	tripartite motif-containing protein 55 [Source:RefSeq peptide;Acc:NP_001186333]
ENSGALG00000028153	6.01285	0.786496	15.4225	8.596e-05	0.0121678	-7.80464	-7.80464	-4.26638	-3.53291	-5.35412	-5.22379	-1.17143	-5.52222	-3.65327	0.949732	2.6519	-1.9554		Uncharacterized protein [Source:UniProtKB/TrEMBL;Acc:R4GI79]
ENSGALG00000014847	5.9932	3.81828	20.3558	6.42967e-06	0.00164961	-5.82276	-4.9764	-6.79449	-6.7455	-9.11226	-8.01068	-7.77521	0.252597	-3.90772	-0.511515	-4.05699	-2.45328	MYOM1	myomesin-1 [Source:RefSeq peptide;Acc:NP_990290]
ENSGALG00000005448	5.95916	3.72707	21.8137	3.00452e-06	0.000948736	-4.46204	-4.16522	-3.77295	-5.76423	-6.11635	-5.3841	-2.44259	-1.14131	-2.92878	1.77961	-4.10235	-6.29581	MYL3	myosin light chain 1, cardiac muscle [Source:RefSeq peptide;Acc:NP_990490]
ENSGALG00000000302	5.2413	4.95913	24.0713	9.28318e-07	0.000368782	-4.7619	-0.334	-3.28122	-1.83585	-1.7176	-2.3946	0.261245	3.59099	1.01263	4.52494	1.09661	2.02738	TNNT2	troponin T, cardiac muscle isoforms [Source:RefSeq peptide;Acc:NP_990780]
ENSGALG00000014835	4.9857	2.68972	15.1952	9.6951e-05	0.0131203	-4.29121	-2.69649	-6.1765	-8.73446	-5.70156	-8.63362	-5.04955	1.152	-2.17123	-3.23145	-1.84217	-1.45806	C7	complement component 7 [Source:HGNC Symbol;Acc:HGNC:1346]
ENSGALG00000014976	4.60601	2.52495	26.2137	3.05646e-07	0.00014477	-5.67258	-2.55421	-5.16972	-4.94105	-5.69234	-4.34431	-1.11139	-1.13565	0.514782	0.100913	-0.677997	-0.447881	GATA6	GATA binding protein 6 [Source:HGNC Symbol;Acc:HGNC:4174]
ENSGALG00000005352	4.53938	4.10825	32.0869	1.47427e-08	1.39659e-05	-5.68316	-1.14037	-3.33927	-2.66099	-2.77871	-2.84975	0.106257	2.01019	2.26127	2.3583	1.3395	1.37981	GATA5	transcription factor GATA-5 [Source:RefSeq peptide;Acc:NP_990752]
ENSGALG00000002886	3.98652	3.43692	32.789	1.02726e-08	1.18517e-05	-3.2989	0.421909	0.0772982	-0.940075	-0.732531	-0.118632	2.40518	2.53771	3.35857	3.75856	3.10261	3.34363	NKX2-5	homeobox protein Nkx-2.5 [Source:RefSeq peptide;Acc:NP_990495]
ENSGALG00000014988	3.98144	1.76364	15.7121	7.37521e-05	0.0109651	-2.82743	-5.88776	-4.28497	-3.65987	-4.27157	-4.11635	-3.05606	-2.49906	-1.23784	1.15142	-1.44098	-1.44192	POPDC2	popeye domain-containing protein 2 [Source:RefSeq peptide;Acc:NP_996747]
ENSGALG00000007831	3.94273	2.82015	23.673	1.14176e-06	0.000439399	-4.49627	-2.45103	-2.88379	-3.4967	-1.72767	-0.635444	0.456519	0.993936	1.85458	0.908019	2.91427	2.67636	TLX1	T-cell leukemia homeobox protein 1 [Source:UniProtKB/Swiss-Prot;Acc:O93366]
ENSGALG00000016020	3.83135	0.924548	12.5052	0.00040582	0.0365881	-2.95658	-3.56971	-3.81212	-4.42252	-4.45724	-3.58651	-6.1066	-0.941551	-1.31251	-0.0094385	-0.441302	-0.457224	CLIC6	chloride intracellular channel 6 [Source:HGNC Symbol;Acc:HGNC:2065]
ENSGALG00000015358	3.74284	5.44637	15.6966	7.43574e-05	0.0109651	-2.0933	-2.37232	-1.57484	-1.95504	-1.99645	-2.48696	-2.26455	-0.882671	-0.892146	3.13556	-2.61921	-2.04739	myosin	myosin heavy chain, cardiac muscle isoform [Source:RefSeq peptide;Acc:NP_990097]
ENSGALG00000027207	3.67801	3.884	17.7927	2.46321e-05	0.00489266	-2.92454	-0.158206	-1.95067	-1.71196	-3.28538	-1.71373	0.425344	2.0032	-0.229589	2.6945	1.14085	-1.24427		PERP, TP53 apoptosis effector [Source:RefSeq peptide;Acc:NP_001264633]
ENSGALG00000011086	3.64516	5.96797	12.5434	0.0003976	0.03627	2.76412	2.2393	2.73708	3.27361	2.74978	2.50397	3.3934	6.12321	2.53657	8.0382	2.46472	2.93521	ACTA1	Actin, alpha skeletal muscle [Source:UniProtKB/Swiss-Prot;Acc:P68139]
ENSGALG00000027217	3.61861	1.62683	11.8259	0.000584119	0.0473252	-2.50876	-0.386717	-3.7546	-3.09787	-2.16361	-0.762544	-0.690339	0.187034	1.94771	2.18104	2.42483	0.474499
ENSGALG00000005323	3.48714	2.23762	13.7583	0.000207896	0.0230653	-4.95658	-3.11439	-6.05947	-5.91578	-6.50975	-3.29283	-1.00936	-0.332325	-1.12313	-0.583436	-0.816829	-2.31431	DIRAS2	DIRAS family, GTP-binding RAS-like 2 [Source:HGNC Symbol;Acc:HGNC:19323]
ENSGALG00000000365	3.40875	2.53983	13.6346	0.000222061	0.0237798	-5.69542	1.59437	-0.140518	0.110598	1.17642	2.29966	3.41123	3.64097	4.36922	5.46531	4.32304	4.5335	NKX2-6	homeobox protein Nkx-2.6 [Source:RefSeq peptide;Acc:NP_990468]
ENSGALG00000027532	3.34865	3.61933	35.6203	2.39773e-09	3.69101e-06	-3.7131	-3.48247	-3.56924	-2.57466	-3.09127	-2.824	-1.03756	-2.26814	-0.198425	0.678001	-0.317313	0.953548	COLEC11	collectin-11 precursor [Source:RefSeq peptide;Acc:NP_001038130]
ENSGALG00000006421	3.22977	2.40713	17.1885	3.38478e-05	0.0060411	-5.20974	-2.9218	-4.62689	-3.4301	-3.82318	-2.35793	-0.989031	0.685883	0.571126	0.564883	0.183379	-0.462684	SLC16A12	solute carrier family 16, member 12 [Source:HGNC Symbol;Acc:HGNC:23094]
ENSGALG00000023195	3.16402	2.96036	16.4604	4.9677e-05	0.00804963	-2.65038	-2.60406	-5.16181	-1.10161	-1.55928	-1.06074	-1.29508	0.0883947	1.90841	2.42772	1.84845	1.3263	DLX6	distal-less homeobox 6 [Source:RefSeq peptide;Acc:NP_001074359]
ENSGALG00000002355	3.02446	5.15811	34.3614	4.57702e-09	6.2629e-06	-1.91017	-1.27975	-1.43569	-1.40242	-1.60437	-1.37311	0.271557	2.36312	1.23056	2.4551	0.601482	0.918185	RBPMS2	RNA-binding protein with multiple splicing [Source:UniProtKB/Swiss-Prot;Acc:Q9W6I1]
ENSGALG00000016367	2.97221	4.62053	17.0135	3.71148e-05	0.00643758	-4.59313	-4.39376	-3.76772	-3.9859	-4.19918	-4.05868	-1.94283	-6.74634	-1.74884	-0.746888	-0.854608	-2.03725	SNTG2	syntrophin, gamma 2 [Source:HGNC Symbol;Acc:HGNC:13741]
ENSGALG00000001857	2.94231	3.14634	14.9593	0.000109856	0.0143923	-3.58304	-2.98724	-4.44499	-1.83799	-2.95955	-2.50007	-1.29373	-3.71796	0.124648	0.223417	1.23016	-0.03495	FAM132A	family with sequence similarity 132, member A [Source:HGNC Symbol;Acc:HGNC:32308]
ENSGALG00000003894	2.88477	1.77096	13.8693	0.000195972	0.0219399	-0.000272629	-0.0785201	-0.669945	-1.52536	-0.624248	-0.0158318	0.0172559	1.07645	-0.0681894	2.06732	1.53554	2.90915	CBLN1	cerebellin 1 precursor [Source:HGNC Symbol;Acc:HGNC:1543]
ENSGALG00000006104	2.87911	4.52623	25.0004	5.73172e-07	0.000252093	-5.73806	-4.72343	-6.20394	-5.54848	-5.58439	-4.8812	-4.16453	-1.25048	-1.42549	-2.53746	-2.28741	-2.45586	ADAMTSL3	ADAMTS-like 3 [Source:HGNC Symbol;Acc:HGNC:14633]
ENSGALG00000005493	2.87559	2.41357	12.2799	0.000457858	0.0399895	-1.78637	-1.49699	-2.73564	-2.36757	-2.40327	-2.14046	0.301438	1.77668	-1.09798	1.5037	-1.04052	0.185141	ITGB1BP2	integrin beta 1 binding protein (melusin) 2 [Source:HGNC Symbol;Acc:HGNC:6154]
ENSGALG00000016076	2.79352	2.7517	18.4594	1.73566e-05	0.00381691	-3.73315	-3.30974	-3.7636	-3.02398	-2.79756	-3.42904	-11.452	-11.452	-11.452	-0.278551	-1.55043	0.407612	DPYS	dihydropyrimidinase isoform 2 [Source:RefSeq peptide;Acc:NP_001264356]
ENSGALG00000029169	2.75496	3.13307	15.2316	9.50964e-05	0.0130124	-2.41165	0.844946	0.113279	0.162825	0.261243	-0.171798	-0.512889	-1.10862	-0.398873	1.49869	3.58401	2.76521	HHEX	hematopoietically-expressed homeobox protein HHEX [Source:RefSeq peptide;Acc:NP_990583]
ENSGALG00000012735	2.70358	4.98843	21.172	4.19844e-06	0.00120241	-1.47312	-0.308656	1.45805	0.904085	1.14132	1.9314	1.06217	1.73227	2.10052	3.20863	3.80627	4.81513	EDN1	endothelin 1 [Source:HGNC Symbol;Acc:HGNC:3176]
ENSGALG00000003814	2.69927	3.77475	14.8102	0.000118888	0.014876	-0.635742	-0.135578	0.388463	1.6529	1.43991	1.39566	0.819563	2.08868	4.7674	4.31313	4.2895	3.96825	Dkk-1	Uncharacterized protein [Source:UniProtKB/TrEMBL;Acc:F6ULT8]
ENSGALG00000012913	2.65648	4.86604	30.5722	3.21678e-08	2.64097e-05	-2.26976	-1.2189	-2.1498	-1.96173	-2.8416	-2.71258	-1.36828	0.624772	-0.104672	0.685502	-0.15032	-0.0746948	PKP2	plakophilin 2 [Source:HGNC Symbol;Acc:HGNC:9024]
ENSGALG00000007837	2.65242	6.00051	38.3353	5.95746e-10	1.44024e-06	0.248289	0.92319	2.12741	1.93942	2.53392	2.61346	3.88569	4.17272	4.09535	4.05623	5.17415	5.53111	KAZALD1	Kazal-type serine peptidase inhibitor domain 1 [Source:HGNC Symbol;Acc:HGNC:25460]
ENSGALG00000015148	2.63547	4.71745	32.5614	1.15486e-08	1.18517e-05	-0.718763	-0.851398	-0.404266	-2.00263	-1.21679	-1.7113	0.343337	2.12497	1.63615	0.735299	0.39371	1.65216	ANXA1	annexin A1 [Source:RefSeq peptide;Acc:NP_996789]
ENSGALG00000025898	2.5704	4.63449	28.711	8.40271e-08	5.44628e-05	-2.22922	-2.24953	-2.1824	-1.35998	-1.65566	-1.9022	-2.11865	-0.427731	0.478497	1.194	0.729174	0.880937	SMAD6	Mothers against decapentaplegic homolog 6 [Source:UniProtKB/Swiss-Prot;Acc:Q9W734]
ENSGALG00000025919	2.54405	7.26016	42.9104	5.73052e-11	3.52857e-07	2.64678	2.66444	2.89851	3.37053	3.06125	3.06818	3.76862	3.76698	5.55436	6.06467	5.40684	5.60148	BAMBI	BMP and activin membrane-bound inhibitor homolog precursor [Source:RefSeq peptide;Acc:NP_001182330]
ENSGALG00000001459	2.53545	5.96127	14.9814	0.000108577	0.0143777	2.24984	2.28968	2.45119	1.98384	1.61323	1.94016	3.3097	5.06915	2.30361	5.61075	2.61492	2.98421	TNNC1	Troponin C, slow skeletal and cardiac muscles [Source:UniProtKB/Swiss-Prot;Acc:P09860]
ENSGALG00000012712	2.53354	4.46981	14.4519	0.000143784	0.0170259	-1.23058	-0.190375	-0.847433	-0.696222	-1.04795	-0.551586	-0.200124	2.19402	0.122672	2.84661	-0.189648	1.16918	RBM24	RNA-binding protein 24 [Source:RefSeq peptide;Acc:NP_001012881]
ENSGALG00000012670	2.53296	3.45033	17.8821	2.35025e-05	0.0047448	0.622509	-0.417678	0.451426	0.908753	0.177045	0.663463	0.550498	2.13081	2.84768	3.38237	3.5519	2.13182	NRSN1	neurensin 1 [Source:HGNC Symbol;Acc:HGNC:17881]
ENSGALG00000006343	2.52546	8.73067	16.7048	4.36707e-05	0.00726763	1.86986	3.71213	2.56215	4.27734	3.0267	3.86985	5.39043	7.75148	5.46435	7.27014	5.10003	5.75697	ACTG2	actin, aortic smooth muscle [Source:RefSeq peptide;Acc:NP_001026400]
ENSGALG00000026616	2.42534	5.37789	13.2209	0.00027684	0.0277178	0.336551	2.08148	1.50635	1.00138	1.75142	1.42227	1.24861	1.4532	4.49337	4.33531	4.00664	2.79963	KRT78	keratin 78, type II [Source:HGNC Symbol;Acc:HGNC:28926]
ENSGALG00000016127	2.34305	4.53734	12.8694	0.00033399	0.0318845	-1.51534	-0.788323	-1.06254	-1.39835	-2.54397	-1.22701	-0.347416	1.16057	-1.08706	1.87988	-0.473471	-0.840846	SH3BGR	SH3 domain binding glutamate-rich protein [Source:HGNC Symbol;Acc:HGNC:10822]
ENSGALG00000011902	2.29841	3.77247	12.1245	0.000497626	0.0419967	-0.103928	0.377808	0.0676187	2.03689	0.465529	0.51049	1.5857	3.10504	1.41843	4.5504	1.92338	2.75516	TAGLN	Transgelin [Source:UniProtKB/Swiss-Prot;Acc:P19966]
ENSGALG00000001926	2.28473	4.37178	15.3325	9.01516e-05	0.0125791	1.3029	1.63738	2.10966	2.44571	1.74149	1.93128	2.9228	3.97013	2.36372	5.44161	2.75645	3.48404	HSPB1	heat shock protein beta-1 [Source:RefSeq peptide;Acc:NP_990621]
ENSGALG00000004569	2.26674	5.36414	27.2659	1.77307e-07	9.49361e-05	-1.34353	-0.548002	-1.28519	-0.901917	-0.965898	-0.58057	0.252166	0.0491855	1.76383	0.893478	1.99841	1.26297	UNC5B	netrin receptor UNC5B precursor [Source:RefSeq peptide;Acc:NP_001026396]
ENSGALG00000000313	2.17755	4.71756	14.3768	0.000149634	0.0173786	-0.332162	0.496648	1.48025	1.58255	1.41781	1.64787	3.03214	4.73085	2.71968	4.5412	2.46457	3.45911	TNNI1	troponin I type 1 (skeletal, slow) [Source:HGNC Symbol;Acc:HGNC:11945]
ENSGALG00000001967	2.03883	3.29238	16.1339	5.90192e-05	0.00920028	-1.89784	-1.33599	-2.78086	-2.18619	-2.06067	-2.53676	-1.94968	-1.10052	-1.51898	-0.234314	-0.0188	-0.401023	ABCA3	ATP-binding cassette, sub-family A (ABC1), member 3 [Source:HGNC Symbol;Acc:HGNC:33]
ENSGALG00000004631	2.02384	4.73758	13.0021	0.000311138	0.0304101	2.82929	1.23153	0.69614	-0.160603	-0.208017	-0.521441	-0.68386	1.03528	-1.3151	1.73613	1.37079	2.02614	DRAXIN	Draxin [Source:UniProtKB/Swiss-Prot;Acc:B6ZI38]
ENSGALG00000017106	-2.26582	3.95331	14.7992	0.000119588	0.014876	-3.59376	-3.31697	-3.67169	-3.69509	-4.43052	-4.27266	-4.3984	-3.90159	-6.39295	-5.65997	-6.31978	-7.9176	ATP8A2	ATPase, aminophospholipid transporter, class I, type 8A, member 2 [Source:HGNC Symbol;Acc:HGNC:13533]
ENSGALG00000012290	-2.74028	6.47461	12.8507	0.000337356	0.0318845	3.81419	4.85649	3.91456	3.67964	3.76008	3.62382	2.80433	1.46595	-0.951545	2.21351	-0.263522	-1.6428	SOX10	Transcription factor SOX-10 [Source:UniProtKB/Swiss-Prot;Acc:Q9W757]
ENSGALG00000013782	-2.8688	4.51588	19.3615	1.08168e-05	0.00251338	-0.731192	-1.70026	-1.61571	-0.236998	-1.21994	-1.88983	-3.42805	-1.38962	-4.14553	-3.24771	-3.6547	-5.20366	CDH7	cadherin-7 precursor [Source:RefSeq peptide;Acc:NP_989518]
ENSGALG00000023689	-3.17081	4.8374	28.2565	1.06255e-07	6.23368e-05	0.824883	2.03922	0.857016	1.63049	0.465822	1.20577	-0.134651	-2.97875	-1.70372	-1.36465	-2.46413	-2.43864	ASS1	argininosuccinate synthase [Source:RefSeq peptide;Acc:NP_001013413]
ENSGALG00000012018	-3.29172	2.43362	12.9056	0.000327606	0.0317674	-3.54415	-1.7573	-2.04924	-1.88146	-3.39973	-2.13156	-5.61645	-3.82715	-3.12991	-5.34829	-4.84797	-9.67515	CGT	2-hydroxyacylsphingosine 1-beta-galactosyltransferase precursor [Source:RefSeq peptide;Acc:NP_989535]
ENSGALG00000003014	-3.33804	2.66708	12.8407	0.000339169	0.0318845	1.26864	1.88457	0.61731	-1.13692	1.13606	0.559066	-1.76953	-7.05445	-2.62299	-2.49379	-4.7764	-2.33167	CHRNA3	Neuronal acetylcholine receptor subunit alpha-3 [Source:UniProtKB/Swiss-Prot;Acc:P09481]
ENSGALG00000027887	-3.33842	3.56853	13.0321	0.000306189	0.0301657	-0.0617777	1.25807	0.399314	-2.15234	-0.276799	-1.05511	-0.609273	-0.711492	-1.90509	-10.9205	-2.86691	-6.29972		Uncharacterized protein [Source:UniProtKB/TrEMBL;Acc:R4GKL8]
ENSGALG00000006054	-3.65179	3.7611	14.8882	0.000114076	0.0147878	3.12795	1.40358	1.66374	2.89301	2.00243	2.67666	-0.256704	0.177511	-4.78405	-2.89029	-3.13126	0.236859	CALCA	calcitonin gene-related peptide isoform 3 preproprotein [Source:RefSeq peptide;Acc:NP_001258895]
ENSGALG00000020554	-3.65733	5.85217	76.5495	2.14765e-18	2.64484e-14	-2.02756	-2.94808	-2.3426	-2.24662	-2.15626	-2.01873	-2.74389	-3.23161	-4.82107	-5.71375	-5.80966	-5.86304	ADAMTSL1	ADAMTS-like 1 [Source:HGNC Symbol;Acc:HGNC:14632]
ENSGALG00000026853	-3.66913	2.86065	15.8722	6.77687e-05	0.0103033	0.224136	-0.252725	1.0983	0.566641	-0.0499905	0.313356	-7.86276	-6.12365	-10.1645	-2.35361	-3.416	-10.1645	FGF3	Fibroblast growth factor 3 [Source:UniProtKB/Swiss-Prot;Acc:P48801]
ENSGALG00000012941	-3.96994	3.72801	24.6501	6.87404e-07	0.00029191	-5.17131	-3.74135	-4.59522	-3.30752	-3.57578	-4.24936	-7.18582	-6.50048	-5.80539	-11.1652	-8.61522	-6.34591	CDH12	cadherin 12, type 2 (N-cadherin 2) [Source:HGNC Symbol;Acc:HGNC:1751]
ENSGALG00000009853	-4.29444	0.430798	11.998	0.000532573	0.0434347	0.0914174	1.93492	1.08646	1.56221	0.331271	0.324215	-7.04591	-7.04591	-7.04591	-7.04591	-2.13653	-4.5297	FOXG1	forkhead box protein G1 [Source:RefSeq peptide;Acc:NP_990524]
ENSGALG00000010820	-4.72824	3.85587	14.8478	0.000116542	0.014876	-0.153563	0.105081	-0.394326	1.4493	2.51301	1.98509	-0.750443	-10.1619	-2.45494	-10.1619	-2.29518	-1.91814	CHGA	chromogranin A [Source:HGNC Symbol;Acc:HGNC:1929]
ENSGALG00000025748	-4.94195	0.879308	16.5098	4.83989e-05	0.00794709	-4.49383	-3.14818	-4.49626	-2.27147	-4.10139	-2.71236	-9.55033	-7.81122	-11.8521	-8.66161	-6.53972	-11.8521	Fgf9	glia-activating factor [Source:RefSeq peptide;Acc:NP_989730]
ENSGALG00000014994	-4.94692	0.0887704	13.6647	0.000218529	0.0237798	-2.45714	-0.570344	-2.32308	-2.97457	-3.18554	-3.84258	-7.58035	-7.59969	-9.88211	-9.88211	-7.80214	-7.36589		Uncharacterized protein [Source:UniProtKB/TrEMBL;Acc:E1C1R3]
ENSGALG00000001150	-5.42718	1.00499	27.5049	1.567e-07	8.77163e-05	-6.22799	-5.40455	-7.21958	-5.55885	-6.32532	-5.13723	-10.1434	-10.1665	-9.71302	-10.7899	-11.6133	-10.5893		Uncharacterized protein [Source:UniProtKB/TrEMBL;Acc:F1P3R5]
ENSGALG00000019651	-5.57678	3.47874	19.0022	1.30565e-05	0.00292346	-0.494407	1.15465	0.781633	1.90515	-0.413785	0.924617	-2.41163	-0.00352377	-3.32846	-10.1744	-10.1744	-2.88173	AGR3	anterior gradient protein 3 homolog precursor [Source:RefSeq peptide;Acc:NP_001186542]
ENSGALG00000014264	-6.05968	0.209172	12.7802	0.000350301	0.0326382	-3.97047	-3.27796	-1.87602	-2.80898	-2.51078	-2.72223	-2.92908	-10.4038	-7.45746	-7.21333	-10.4038	-10.4038	NSUN7	NOP2/Sun domain family, member 7 [Source:HGNC Symbol;Acc:HGNC:25857]
ENSGALG00000023069	-6.57607	-0.365774	15.3167	9.09086e-05	0.0125791	-6.66528	-5.82792	-5.31516	-4.67775	-4.78531	-4.91199	-5.29726	-6.92877	-12.238	-9.89756	-12.238	-12.238	MYRIP	myosin VIIA and Rab interacting protein [Source:HGNC Symbol;Acc:HGNC:19156]
ENSGALG00000020679	-6.72025	3.20054	17.9948	2.21512e-05	0.00462359	0.15314	0.142076	-0.942132	-0.305388	-1.20186	0.762125	-0.556712	-4.88094	-10.8545	-10.8545	-5.22751	-10.8545	PLEKHS1	pleckstrin homology domain containing, family S member 1 [Source:HGNC Symbol;Acc:HGNC:26285]
ENSGALG00000012464	-6.94926	-0.603429	15.6856	7.47926e-05	0.0109651	-4.47838	-3.32561	-3.79963	-4.13953	-4.79984	-3.82927	-3.17808	-6.12337	-2.68236	-10.1642	-10.1642	-10.1642	SOUL	SOUL protein [Source:RefSeq peptide;Acc:NP_990120]
ENSGALG00000008570	-6.9794	-1.18336	13.2802	0.000268227	0.0272993	-7.11497	-4.59184	-4.67383	-5.04898	-7.17354	-5.67816	-9.41593	-11.7177	-11.7177	-11.7177	-11.7177	-11.7177	MOV10L1	Mov10 RISC complex RNA helicase like 1 [Source:HGNC Symbol;Acc:HGNC:7201]
ENSGALG00000020292	-6.99317	-0.79027	15.5213	8.15818e-05	0.0116823	-5.18368	-3.83991	-4.83513	-5.67667	-5.53408	-6.28072	-9.49769	-11.7994	-11.7994	-11.7994	-11.7994	-11.7994	GABRE	Gamma-aminobutyric acid receptor subunit gamma-4 [Source:UniProtKB/Swiss-Prot;Acc:P34904]
ENSGALG00000003603	-7.23924	-0.56641	14.8022	0.000119395	0.014876	-2.16995	-3.34094	-3.28994	-1.97928	-3.25453	-4.44295	-1.48429	-6.85622	-2.33539	-9.13864	-9.13864	-9.13864		Uncharacterized protein [Source:UniProtKB/TrEMBL;Acc:F1NJ68]
ENSGALG00000014776	-7.25188	0.752666	30.915	2.69576e-08	2.37131e-05	-7.90019	-8.50375	-7.36723	-2.76719	-5.35026	-4.55551	-10.9142	-13.2159	-11.0936	-10.8755	-11.1359	-10.6997	TBX15	T-box 15 [Source:HGNC Symbol;Acc:HGNC:11594]
ENSGALG00000006662	-7.2528	1.58007	38.6418	5.09173e-10	1.44024e-06	-0.939224	-1.02381	-2.11299	-1.18802	-1.2122	-0.675645	-2.87388	-5.72005	-3.31129	-10.3164	-6.89899	-10.3164	BPIFB3	Ovocalyxin-36 precursor [Source:RefSeq peptide;Acc:NP_001026032]
ENSGALG00000006572	-7.37153	0.194467	14.5146	0.000139076	0.0168191	-4.70775	-5.22548	-4.69471	-2.70217	-3.46287	-3.76926	-11.4854	-3.69557	-11.4854	-9.145	-11.4854	-11.4854	TNNT3	Gallus gallus troponin T type 3 (skeletal, fast) (TNNT3), mRNA. [Source:RefSeq mRNA;Acc:NM_204922]
ENSGALG00000003895	-7.48755	-0.080601	17.353	3.10406e-05	0.00594289	-3.39121	0.0768208	-2.40705	-2.7691	-3.28408	-2.64835	-9.37137	-9.37137	-9.37137	-9.37137	-9.37137	-9.37137	PRDM12	PR domain containing 12 [Source:HGNC Symbol;Acc:HGNC:13997]
ENSGALG00000006106	-8.02735	-0.734932	17.3331	3.13673e-05	0.00594289	-2.95525	-1.02542	-4.24753	-3.38728	-1.95754	-1.15243	-6.63365	-8.93541	-8.93541	-8.93541	-8.93541	-8.93541		Uncharacterized protein [Source:UniProtKB/TrEMBL;Acc:F1NCY6]
ENSGALG00000006666	-8.27844	1.91053	29.3567	6.02068e-08	4.36145e-05	0.621359	0.860533	-0.150085	0.984331	0.738706	1.3154	-1.11508	-5.67134	-8.79731	-8.79731	-5.89891	-8.79731	BPIFB7	protein TENP [Source:RefSeq peptide;Acc:NP_990357]
ENSGALG00000013659	-8.35292	1.48632	26.6545	2.43282e-07	0.000124834	-1.84514	-2.84453	-5.54819	-1.539	-3.56228	-5.93395	-7.90977	-11.9735	-9.85114	-9.63304	-11.9735	-11.9735	NOX3	NADPH oxidase 3 [Source:HGNC Symbol;Acc:HGNC:7890]
ENSGALG00000025821	-9.0492	0.123612	21.7038	3.18167e-06	0.000979556	-6.83656	-1.25006	-3.00411	-1.54039	-2.63054	-1.78848	-7.66668	-5.92757	-9.96844	-9.96844	-9.96844	-9.96844	CLDN16	claudin 16 [Source:HGNC Symbol;Acc:HGNC:2037]
ENSGALG00000012190	-9.29579	0.200909	23.1279	1.51577e-06	0.000533335	-5.87301	-7.52641	-5.7957	-4.27485	-5.5988	-4.78895	-9.41066	-13.0878	-6.08273	-13.0878	-13.0878	-13.0878	TMEM163	transmembrane protein 163 [Source:HGNC Symbol;Acc:HGNC:25380]
ENSGALG00000008908	-10.0698	1.03092	38.0159	7.01699e-10	1.44024e-06	-0.12683	2.52781	0.491754	2.71785	1.85142	1.49571	-6.95469	-6.95469	-6.95469	-6.95469	-6.95469	-6.95469	NEUROD1	neurogenic differentiation factor 1 [Source:RefSeq peptide;Acc:NP_990251]
ENSGALG00000007772	-10.112	1.69323	29.5134	5.55302e-08	4.27409e-05	-0.406754	1.65402	-0.382439	0.21413	-0.0341283	0.324217	-6.63588	-8.93764	-1.4026	-8.93764	-8.93764	-8.93764	CBLN4	cerebellin-4 precursor [Source:RefSeq peptide;Acc:NP_001072955]
ENSGALG00000015347	-10.3025	1.27861	22.4922	2.10995e-06	0.000702272	-4.82843	-11.7048	-1.61792	-2.64905	-5.5257	-1.36986	-11.7048	-11.7048	-11.7048	-11.7048	-11.7048	-11.7048	ZPLD1	zona pellucida-like domain containing 1 [Source:HGNC Symbol;Acc:HGNC:27022]

## Sheet: Front_13_v_13_Stream_bulk
geneId	logFC	logCPM	LR	PValue	FDR	Stream_13_2	Stream_13_3	Stream_13_4	Stream_15_1	Stream_15_2	Stream_15_3	Trailblazer_13_2	Trailblazer_13_3	Trailblazer_13_4	Trailblazer_15_1	Trailblazer_15_2	Trailblazer_15_3	Name	Description
ENSGALG00000000120	9.52753	0.396789	11.893	0.000563442	0.0210345	-9.30349	-9.30349	-9.30349	-6.82348	-9.30349	-9.30349	0.44772	-9.30349	-1.36191	-0.406986	-9.30349	-9.30349	BMP-10	bone morphogenetic protein 10 precursor [Source:RefSeq peptide;Acc:NP_001264975]
ENSGALG00000009844	4.93917	6.91976	9.94177	0.0016157	0.0436126	-2.19231	-0.621719	-2.43397	-1.33872	-3.019	-2.54364	-0.730649	4.97824	-2.94751	7.47761	0.461451	-1.00624	ACTC1	Actin, alpha cardiac muscle 1 [Source:UniProtKB/Swiss-Prot;Acc:P68034]
ENSGALG00000009920	4.78961	2.86218	10.2737	0.00134941	0.0387367	-3.10351	-6.36228	-4.58734	-3.66302	-7.51026	-3.9693	-2.95878	2.16098	-3.57512	-2.98559	-8.74241	-8.30616	Protein	Cochlin [Source:UniProtKB/Swiss-Prot;Acc:O42163]
ENSGALG00000026787	4.78959	1.75549	22.5071	2.09367e-06	0.000318315	-6.89313	-1.09543	-2.97122	-4.41312	-4.4426	-4.31228	1.4783	2.75955	2.72495	3.13137	2.61967	1.94897	HAND1	heart- and neural crest derivatives-expressed protein 1 [Source:RefSeq peptide;Acc:NP_990296]
ENSGALG00000014847	4.43902	3.81828	13.1295	0.000290681	0.0127393	-5.82276	-4.9764	-6.79449	-6.7455	-9.11226	-8.01068	-7.77521	0.252597	-3.90772	-0.511515	-4.05699	-2.45328	MYOM1	myomesin-1 [Source:RefSeq peptide;Acc:NP_990290]
ENSGALG00000007831	4.28514	2.82015	26.3555	2.84006e-07	7.13782e-05	-4.49627	-2.45103	-2.88379	-3.4967	-1.72767	-0.635444	0.456519	0.993936	1.85458	0.908019	2.91427	2.67636	TLX1	T-cell leukemia homeobox protein 1 [Source:UniProtKB/Swiss-Prot;Acc:O93366]
ENSGALG00000006421	4.19353	2.40713	26.3653	2.8257e-07	7.13782e-05	-5.20974	-2.9218	-4.62689	-3.4301	-3.82318	-2.35793	-0.989031	0.685883	0.571126	0.564883	0.183379	-0.462684	SLC16A12	solute carrier family 16, member 12 [Source:HGNC Symbol;Acc:HGNC:23094]
ENSGALG00000005352	4.12103	4.10825	27.654	1.4507e-07	4.25365e-05	-5.68316	-1.14037	-3.33927	-2.66099	-2.77871	-2.84975	0.106257	2.01019	2.26127	2.3583	1.3395	1.37981	GATA5	transcription factor GATA-5 [Source:RefSeq peptide;Acc:NP_990752]
ENSGALG00000004418	4.09304	0.404765	11.759	0.000605496	0.0218671	-3.12801	-5.56553	-3.46982	-1.73002	-2.43171	-7.94461	1.08817	0.0116557	-0.635023	-0.421785	-0.388305	-0.939415	SS2R	somatostatin receptor type 2 [Source:RefSeq peptide;Acc:NP_001025516]
ENSGALG00000001407	4.06079	0.836312	12.6885	0.000367904	0.0152764	-4.21571	-6.7732	-5.78181	-5.17491	-4.35895	-4.3389	-0.637239	-1.62544	-1.44942	-6.2847	-1.54357	-2.08905	ADAMTS15	ADAM metallopeptidase with thrombospondin type 1 motif, 15 [Source:HGNC Symbol;Acc:HGNC:16305]
ENSGALG00000000302	4.03693	4.95913	16.0242	6.25378e-05	0.00412968	-4.7619	-0.334	-3.28122	-1.83585	-1.7176	-2.3946	0.261245	3.59099	1.01263	4.52494	1.09661	2.02738	TNNT2	troponin T, cardiac muscle isoforms [Source:RefSeq peptide;Acc:NP_990780]
ENSGALG00000023195	3.91159	2.96036	22.9176	1.69099e-06	0.000279022	-2.65038	-2.60406	-5.16181	-1.10161	-1.55928	-1.06074	-1.29508	0.0883947	1.90841	2.42772	1.84845	1.3263	DLX6	distal-less homeobox 6 [Source:RefSeq peptide;Acc:NP_001074359]
ENSGALG00000006343	3.73411	8.73067	32.8677	9.86501e-09	4.04959e-06	1.86986	3.71213	2.56215	4.27734	3.0267	3.86985	5.39043	7.75148	5.46435	7.27014	5.10003	5.75697	ACTG2	actin, aortic smooth muscle [Source:RefSeq peptide;Acc:NP_001026400]
ENSGALG00000006104	3.59939	4.52623	36.8143	1.29936e-09	9.41269e-07	-5.73806	-4.72343	-6.20394	-5.54848	-5.58439	-4.8812	-4.16453	-1.25048	-1.42549	-2.53746	-2.28741	-2.45586	ADAMTSL3	ADAMTS-like 3 [Source:HGNC Symbol;Acc:HGNC:14633]
ENSGALG00000003814	3.54127	3.77475	23.4588	1.27621e-06	0.000224521	-0.635742	-0.135578	0.388463	1.6529	1.43991	1.39566	0.819563	2.08868	4.7674	4.31313	4.2895	3.96825	Dkk-1	Uncharacterized protein [Source:UniProtKB/TrEMBL;Acc:F6ULT8]
ENSGALG00000005936	3.49213	2.61959	10.8135	0.0010076	0.0313349	-6.92038	-1.49344	0.305046	3.08983	1.94219	2.31786	0.58588	3.89814	0.614651	3.25372	2.16523	3.85086	AGTR2	angiotensin II receptor, type 2 [Source:HGNC Symbol;Acc:HGNC:338]
ENSGALG00000000365	3.48842	2.53983	13.9929	0.0001835	0.00938403	-5.69542	1.59437	-0.140518	0.110598	1.17642	2.29966	3.41123	3.64097	4.36922	5.46531	4.32304	4.5335	NKX2-6	homeobox protein Nkx-2.6 [Source:RefSeq peptide;Acc:NP_990468]
ENSGALG00000014976	3.44406	2.52495	16.707	4.36194e-05	0.00317373	-5.67258	-2.55421	-5.16972	-4.94105	-5.69234	-4.34431	-1.11139	-1.13565	0.514782	0.100913	-0.677997	-0.447881	GATA6	GATA binding protein 6 [Source:HGNC Symbol;Acc:HGNC:4174]
ENSGALG00000005323	3.4402	2.23762	13.6039	0.000225712	0.0104504	-4.95658	-3.11439	-6.05947	-5.91578	-6.50975	-3.29283	-1.00936	-0.332325	-1.12313	-0.583436	-0.816829	-2.31431	DIRAS2	DIRAS family, GTP-binding RAS-like 2 [Source:HGNC Symbol;Acc:HGNC:19323]
ENSGALG00000016826	3.41736	2.60834	14.0213	0.000180747	0.00935252	-11.0554	-4.50934	-3.29454	-3.60416	-3.27507	-4.14142	-2.0226	-0.342531	-0.928842	-0.369626	-1.49247	-0.776273	ADPRHL1	ADP-ribosylhydrolase like 1 [Source:HGNC Symbol;Acc:HGNC:21303]
ENSGALG00000002121	3.22768	1.23278	12.8684	0.000334181	0.014094	-5.65048	-4.25251	-4.49595	-3.95229	-4.3691	-3.11855	-2.65627	-0.865971	-1.4167	-2.63776	-0.952941	-1.78128	PLEKHN1	pleckstrin homology domain containing, family N member 1 [Source:HGNC Symbol;Acc:HGNC:25284]
ENSGALG00000011306	3.16428	3.93256	36.1647	1.8133e-09	1.07244e-06	-1.22003	-0.262569	0.0737526	0.722516	1.83171	1.52427	2.74776	2.97399	2.62404	3.56766	1.78707	2.93333	DES	desmin [Source:HGNC Symbol;Acc:HGNC:2770]
ENSGALG00000024000	3.16174	2.79637	11.238	0.000801402	0.0262481	-1.94682	-2.23749	0.609372	-0.924939	2.15451	1.58069	1.58357	3.04112	2.72872	2.79623	2.0657	5.0678	7	Type-1 angiotensin II receptor [Source:UniProtKB/Swiss-Prot;Acc:P79785]
ENSGALG00000002886	3.1014	3.43692	21.5931	3.37061e-06	0.000466394	-3.2989	0.421909	0.0772982	-0.940075	-0.732531	-0.118632	2.40518	2.53771	3.35857	3.75856	3.10261	3.34363	NKX2-5	homeobox protein Nkx-2.5 [Source:RefSeq peptide;Acc:NP_990495]
ENSGALG00000002355	3.05456	5.15811	35.0137	3.27386e-09	1.62298e-06	-1.91017	-1.27975	-1.43569	-1.40242	-1.60437	-1.37311	0.271557	2.36312	1.23056	2.4551	0.601482	0.918185	RBPMS2	RNA-binding protein with multiple splicing [Source:UniProtKB/Swiss-Prot;Acc:Q9W6I1]
ENSGALG00000000313	3.0482	4.71756	26.2507	2.99841e-07	7.37389e-05	-0.332162	0.496648	1.48025	1.58255	1.41781	1.64787	3.03214	4.73085	2.71968	4.5412	2.46457	3.45911	TNNI1	troponin I type 1 (skeletal, slow) [Source:HGNC Symbol;Acc:HGNC:11945]
ENSGALG00000000839	2.83331	3.91595	36.6107	1.44238e-09	9.86831e-07	-2.5212	-2.66769	-2.60996	-2.15369	-1.73178	-1.28751	-0.463816	0.357429	0.604954	-0.0843409	-0.87147	-1.31077	WNT11	Protein Wnt-11 [Source:UniProtKB/Swiss-Prot;Acc:P49339]
ENSGALG00000016193	2.81921	3.46816	16.4795	4.91788e-05	0.00344112	-4.9218	-4.95527	-3.85306	-5.94161	-3.16552	-3.37769	-2.15665	-2.02604	-1.0634	-4.13309	-2.14829	-3.65296	KCNK9	potassium channel, two pore domain subfamily K, member 9 [Source:HGNC Symbol;Acc:HGNC:6283]
ENSGALG00000002854	2.80055	2.17697	12.6415	0.000377276	0.0154872	-6.9358	-7.54313	-7.40496	-6.95412	-7.11462	-7.0473	-4.14236	-6.01526	-3.99209	-5.49417	-3.90479	-6.46783	PDZD2	PDZ domain containing 2 [Source:HGNC Symbol;Acc:HGNC:18486]
ENSGALG00000007837	2.74272	6.00051	40.5218	1.94439e-10	2.14332e-07	0.248289	0.92319	2.12741	1.93942	2.53392	2.61346	3.88569	4.17272	4.09535	4.05623	5.17415	5.53111	KAZALD1	Kazal-type serine peptidase inhibitor domain 1 [Source:HGNC Symbol;Acc:HGNC:25460]
ENSGALG00000011778	2.73164	5.79509	39.0665	4.09622e-10	3.36299e-07	-2.06316	-1.20755	-1.91376	-0.863639	0.0684235	-0.258407	0.2442	1.12283	1.51684	0.527085	1.95039	0.432798	ITGB5	integrin beta-5 precursor [Source:RefSeq peptide;Acc:NP_989814]
ENSGALG00000018439	2.70837	3.89117	39.1587	3.90712e-10	3.36299e-07	2.27249	1.81126	1.76861	4.59834	4.87253	4.52274	3.92057	4.96017	4.9247	5.2241	5.06457	5.09417	DLX1	Gallus gallus distal-less homeobox 1 (DLX1), mRNA. [Source:RefSeq mRNA;Acc:NM_001045842]
ENSGALG00000004386	2.70431	4.67936	31.6896	1.80892e-08	6.7869e-06	-0.589765	-0.165474	-0.370297	1.1052	1.77929	1.70944	0.860614	1.9266	3.25468	3.02765	3.05104	3.25147	Sox9	Transcription factor SOX-9 [Source:UniProtKB/Swiss-Prot;Acc:P48434]
ENSGALG00000005493	2.69509	2.41357	11.0559	0.000884071	0.0282788	-1.78637	-1.49699	-2.73564	-2.36757	-2.40327	-2.14046	0.301438	1.77668	-1.09798	1.5037	-1.04052	0.185141	ITGB1BP2	integrin beta 1 binding protein (melusin) 2 [Source:HGNC Symbol;Acc:HGNC:6154]
ENSGALG00000006087	2.6913	5.00558	12.4123	0.000426516	0.0169985	-5.85307	-4.1065	-4.44215	-3.32045	-2.81217	-3.02999	-4.82565	-3.83191	-0.562041	-0.892196	0.297764	-1.44537	GPC3	glypican 3 [Source:HGNC Symbol;Acc:HGNC:4451]
ENSGALG00000005802	2.68653	3.50704	13.7582	0.000207907	0.0100249	-4.9248	-2.93696	-3.05502	-3.20742	-2.45772	-2.43159	0.270329	-2.8878	-1.04885	-1.64721	0.324445	-0.841018	FLT4	fms-related tyrosine kinase 4 [Source:HGNC Symbol;Acc:HGNC:3767]
ENSGALG00000027532	2.65148	3.61933	23.325	1.36807e-06	0.000233997	-3.7131	-3.48247	-3.56924	-2.57466	-3.09127	-2.824	-1.03756	-2.26814	-0.198425	0.678001	-0.317313	0.953548	COLEC11	collectin-11 precursor [Source:RefSeq peptide;Acc:NP_001038130]
ENSGALG00000001857	2.63139	3.14634	12.0926	0.000506231	0.0195358	-3.58304	-2.98724	-4.44499	-1.83799	-2.95955	-2.50007	-1.29373	-3.71796	0.124648	0.223417	1.23016	-0.03495	FAM132A	family with sequence similarity 132, member A [Source:HGNC Symbol;Acc:HGNC:32308]
ENSGALG00000013576	2.62348	3.17188	12.9816	0.000314567	0.0134979	-4.01743	-3.55553	-4.25723	-4.9976	-4.22986	-4.19133	-3.16528	-3.08761	-0.00675209	-2.27005	-2.62369	-2.04367	Mel1a	Melatonin receptor type 1A [Source:UniProtKB/Swiss-Prot;Acc:P49285]
ENSGALG00000027213	2.55018	4.07787	24.4648	7.56795e-07	0.000147935	-2.27272	-2.51922	-1.55829	-1.90899	0.00465203	-0.738675	0.400837	0.66343	0.399087	-0.165517	-0.307945	-1.61587	ALX1	ALX homeobox 1 [Source:HGNC Symbol;Acc:HGNC:1494]
ENSGALG00000015425	2.44881	5.15139	22.0936	2.59678e-06	0.000380465	0.0523876	-0.464895	-0.526848	-0.676725	0.315142	-0.391522	1.09879	1.03377	3.20337	1.16311	2.2962	1.13369	LPL	Lipoprotein lipase [Source:UniProtKB/Swiss-Prot;Acc:P11602]
ENSGALG00000005692	2.42396	3.7243	11.0685	0.000878071	0.0282335	-1.50616	-2.91181	-1.8804	-2.6002	-2.03279	-1.73685	0.0698927	-1.20882	1.36498	-4.47137	-0.986754	-2.77817	CRISPLD2	cysteine-rich secretory protein LCCL domain containing 2 [Source:HGNC Symbol;Acc:HGNC:25248]
ENSGALG00000005419	2.39935	5.10628	34.0473	5.37888e-09	2.36575e-06	-4.20243	-5.3633	-5.03859	-4.36243	-4.48458	-3.85488	-3.40527	-1.77723	-2.40369	-2.94331	-2.61156	-2.60336	ERC2	ELKS/RAB6-interacting/CAST family member 2 [Source:HGNC Symbol;Acc:HGNC:31922]
ENSGALG00000004286	2.35297	2.79235	9.89323	0.00165888	0.0443897	-6.58525	-4.96132	-4.5268	-4.4077	-3.56345	-4.03436	-2.36156	-3.30336	-2.81139	-5.87914	-2.52004	-3.13414	COL13A1	collagen, type XIII, alpha 1 [Source:HGNC Symbol;Acc:HGNC:2190]
ENSGALG00000015454	2.32578	2.76491	11.221	0.000808757	0.0264187	-3.90162	-5.66312	-3.57335	-2.36865	-2.86734	-3.02557	-3.24978	-0.939725	-2.1262	-2.34796	-2.13317	-3.11702	CA8	carbonic anhydrase VIII [Source:HGNC Symbol;Acc:HGNC:1382]
ENSGALG00000008632	2.27083	2.64353	12.6836	0.000368886	0.0152764	-3.67696	-4.32954	-4.45098	-3.60203	-3.01918	-3.45914	-2.61461	-1.30911	-1.89172	-2.85326	-1.15398	-2.06495	ACSS1	acyl-CoA synthetase short-chain family member 1 [Source:HGNC Symbol;Acc:HGNC:16091]
ENSGALG00000015140	2.24515	4.08387	13.8447	0.000198557	0.00972682	-2.22839	-0.505042	-2.51852	-1.81874	-2.57669	-1.66684	1.60688	-1.05412	0.718791	-0.516024	-0.245535	-0.0931443		Uncharacterized protein [Source:UniProtKB/TrEMBL;Acc:F1NJD7]
ENSGALG00000006351	2.23308	5.01519	35.0014	3.29472e-09	1.62298e-06	-0.999392	-0.154494	-0.138277	0.871656	0.992488	0.977175	1.09057	2.51954	1.57549	2.18499	1.96543	2.01885	FAS	tumor necrosis factor receptor superfamily member 6 precursor [Source:RefSeq peptide;Acc:NP_001186416]
ENSGALG00000015148	2.18845	4.71745	23.4922	1.25419e-06	0.000223845	-0.718763	-0.851398	-0.404266	-2.00263	-1.21679	-1.7113	0.343337	2.12497	1.63615	0.735299	0.39371	1.65216	ANXA1	annexin A1 [Source:RefSeq peptide;Acc:NP_996789]
ENSGALG00000027501	2.17494	3.80733	22.0721	2.62603e-06	0.000380465	-0.903901	-0.0857807	0.0957499	0.405097	1.29419	0.622701	1.47656	2.33697	1.86877	1.67164	2.51095	2.10595	ANPEP	aminopeptidase N [Source:RefSeq peptide;Acc:NP_990192]
ENSGALG00000011271	2.1572	7.80904	20.1812	7.04435e-06	0.000834146	1.29077	1.85934	3.5119	3.94377	3.13116	3.78776	4.39555	4.35597	5.18826	5.47356	5.01119	3.84196	LUM	Lumican [Source:UniProtKB/Swiss-Prot;Acc:P51890]
ENSGALG00000016288	2.15197	4.76385	21.7194	3.15576e-06	0.000441627	-4.19952	-5.37128	-4.85349	-4.25872	-4.56392	-3.88625	-3.72138	-1.86275	-2.71631	-3.46471	-4.54508	-4.0152	IL1RAPL1	interleukin 1 receptor accessory protein-like 1 [Source:HGNC Symbol;Acc:HGNC:5996]
ENSGALG00000005036	2.14872	4.03638	22.2661	2.37365e-06	0.000352187	-1.75875	-1.41527	-1.53912	-1.33771	-0.831697	-0.925962	0.0645783	0.441746	1.06431	-0.824261	0.677437	-0.412943	SH2D3C	SH2 domain containing 3C [Source:HGNC Symbol;Acc:HGNC:16884]
ENSGALG00000011902	2.12487	3.77247	10.4048	0.0012569	0.0365928	-0.103928	0.377808	0.0676187	2.03689	0.465529	0.51049	1.5857	3.10504	1.41843	4.5504	1.92338	2.75516	TAGLN	Transgelin [Source:UniProtKB/Swiss-Prot;Acc:P19966]
ENSGALG00000001617	2.1233	4.30941	21.8221	2.99134e-06	0.000428353	-3.33411	-2.05991	-2.4574	-3.29909	-2.435	-2.02415	-0.421725	-0.507608	-0.288943	-1.42302	-0.107783	-0.479746	CAMKK1	calcium/calmodulin-dependent protein kinase kinase 1, alpha [Source:HGNC Symbol;Acc:HGNC:1469]
ENSGALG00000025937	2.10857	4.27959	26.4934	2.64437e-07	6.92882e-05	-0.982728	-0.0195198	-0.245613	0.659894	0.328706	0.083751	0.983297	1.89734	2.12502	2.07227	1.92498	2.26035	FXYD6	FXYD domain-containing ion transport regulator 6 precursor [Source:RefSeq peptide;Acc:NP_001074348]
ENSGALG00000004812	2.07912	3.18017	11.9508	0.000546238	0.020702	-4.03085	-3.18734	-5.02334	-4.16963	-3.84389	-3.14661	-2.82629	-1.08098	-2.07813	-2.78432	-2.17238	-2.54968	FAM129A	protein Niban [Source:RefSeq peptide;Acc:NP_001012614]
ENSGALG00000025887	2.04108	3.89637	19.5001	1.00593e-05	0.00109628	0.298149	0.40069	-0.117879	1.74218	2.23154	1.45898	2.20932	1.17375	2.88385	2.70372	2.70285	2.4523	ATF3	activating transcription factor 3 [Source:HGNC Symbol;Acc:HGNC:785]
ENSGALG00000007980	2.03045	2.79874	10.2064	0.00139952	0.0395299	-1.33067	0.0333336	-0.132301	-0.180885	0.551784	0.278609	0.81284	0.968338	2.53596	1.29147	2.1719	1.452	KCNG1	potassium channel, voltage gated modifier subfamily G, member 1 [Source:HGNC Symbol;Acc:HGNC:6248]
ENSGALG00000006346	2.01724	9.0741	79.6811	4.39985e-19	2.70921e-15	4.7236	4.80064	4.46736	5.682	5.5976	5.68398	6.30926	6.53406	7.10149	6.19948	6.64836	6.30214	JSC	C-X-C motif chemokine 14 precursor [Source:RefSeq peptide;Acc:NP_990043]
ENSGALG00000028186	2.00046	3.40126	12.9246	0.000324288	0.0138187	-4.3431	-4.93567	-4.65348	-3.27828	-3.70515	-3.82612	-3.54323	-1.8563	-3.00401	-3.31821	-2.63111	-4.33015	RERG	RAS-like, estrogen-regulated, growth inhibitor [Source:HGNC Symbol;Acc:HGNC:15980]
ENSGALG00000009026	-2.00393	3.0534	13.5548	0.000231693	0.0106865	-1.21413	-0.913987	-1.10155	-0.742853	-1.65252	-1.29938	-3.18285	-3.87034	-2.49492	-1.83551	-1.9523	-1.1638	CFAP69	cilia and flagella associated protein 69 [Source:HGNC Symbol;Acc:HGNC:26107]
ENSGALG00000023751	-2.02184	5.10182	21.0264	4.53003e-06	0.000575127	2.03269	3.6141	2.52511	2.65417	1.93585	2.60507	0.449147	0.931815	1.11565	2.53213	1.84552	0.954452	CYP26C1	cytochrome P450, family 26, subfamily C, polypeptide 1 [Source:HGNC Symbol;Acc:HGNC:20577]
ENSGALG00000006192	-2.09019	4.30289	10.192	0.00141053	0.039659	-1.24809	0.289279	-0.798905	-0.307474	-1.32059	-0.119086	-2.16323	-1.91211	-4.94738	-1.47023	-2.90922	-3.57688	USH1C	Usher syndrome 1C (autosomal recessive, severe) [Source:HGNC Symbol;Acc:HGNC:12597]
ENSGALG00000008763	-2.10789	3.21215	12.7715	0.000351943	0.0147924	0.192491	0.36624	-0.216247	0.319182	-1.20156	-0.714886	-1.55174	-3.4399	-1.59569	-1.05323	-1.57105	-1.88215	SSX2IP	afadin- and alpha-actinin-binding protein [Source:RefSeq peptide;Acc:NP_001038121]
ENSGALG00000002911	-2.11838	5.77126	17.5238	2.8373e-05	0.00239104	1.3876	0.939328	0.479901	0.698173	0.28011	0.034271	-0.575345	-1.26649	-1.84147	-0.270752	-1.37566	-3.21521	MOXD1	DBH-like monooxygenase protein 1 precursor [Source:RefSeq peptide;Acc:NP_989955]
ENSGALG00000009415	-2.12693	4.62928	10.2357	0.0013775	0.0389976	-0.929152	-3.00597	-3.39537	-1.20084	-3.31296	-3.26271	-3.31203	-4.9147	-4.76427	-1.5115	-2.4939	-1.38057	SMOC1	SPARC related modular calcium binding 1 [Source:HGNC Symbol;Acc:HGNC:20318]
ENSGALG00000023936	-2.16173	3.1323	13.9915	0.000183642	0.00938403	-0.246265	1.43339	1.15199	0.0215275	0.859951	0.389862	-2.14167	-1.05881	-0.780469	-0.675753	-1.20278	-0.514967		Uncharacterized protein [Source:UniProtKB/TrEMBL;Acc:E1BUD0]
ENSGALG00000029004	-2.17617	6.21015	18.7753	1.47059e-05	0.00149672	-0.265052	-0.656634	-1.18857	-0.9529	-1.29185	-1.59641	-2.28795	-2.91802	-3.5634	-1.96186	-2.97006	-4.92383		Uncharacterized protein [Source:UniProtKB/TrEMBL;Acc:R4GFE9]
ENSGALG00000002437	-2.2537	2.72779	11.7496	0.000608569	0.0219138	0.633802	1.04382	0.830197	0.652795	0.397455	0.583357	-3.42165	-1.80346	-0.416523	0.955439	0.640811	1.06164	FAM69B	family with sequence similarity 69, member B [Source:HGNC Symbol;Acc:HGNC:28290]
ENSGALG00000026873	-2.25482	2.41218	11.3368	0.000759876	0.0253601	-2.58486	-2.90472	-2.87939	-3.39091	-3.24277	-3.48028	-5.68094	-6.22921	-4.09606	-2.19607	-3.12257	-2.87175	RSPO2	R-spondin 2 [Source:HGNC Symbol;Acc:HGNC:28583]
ENSGALG00000016216	-2.26001	4.63654	15.8954	6.69419e-05	0.00436185	0.126909	0.3933	-1.22554	-0.646838	-1.44752	-1.88233	-1.49279	-2.92077	-3.25731	-0.316512	-1.39732	0.613448	NDRG1	N-myc downstream regulated 1 [Source:HGNC Symbol;Acc:HGNC:7679]
ENSGALG00000012177	-2.27798	5.49366	12.9862	0.00031379	0.0134979	-1.75629	-3.38129	-3.70895	-2.02131	-4.09459	-3.976	-4.416	-4.81221	-6.13783	-2.2771	-4.35336	-3.39392	NCKAP5	NCK-associated protein 5 [Source:HGNC Symbol;Acc:HGNC:29847]
ENSGALG00000021685	-2.27887	2.00099	10.5869	0.00113891	0.034085	-0.193799	-0.644509	-0.59362	-0.270387	-0.740758	-0.550828	-3.27925	-2.19293	-2.95605	0.655967	-0.848117	-0.132762	SERINC2	serine incorporator 2 precursor [Source:RefSeq peptide;Acc:NP_001026061]
ENSGALG00000005256	-2.2872	5.34272	19.6785	9.16264e-06	0.0010258	0.357156	-0.375809	-1.53842	-0.879007	-1.55714	-1.54471	-1.67286	-4.18632	-3.02923	-1.20356	-1.44191	-1.05591	EPHA4	Ephrin type-A receptor 4 [Source:UniProtKB/Swiss-Prot;Acc:Q07496]
ENSGALG00000023882	-2.33426	2.57649	11.2458	0.000798047	0.0262237	0.983876	1.88573	1.34679	1.18449	0.258576	1.01719	-1.08529	0.0155182	-2.69575	2.10675	1.02825	1.56855	MALL	MAL-like protein [Source:RefSeq peptide;Acc:NP_001186357]
ENSGALG00000003582	-2.42493	5.44429	30.9489	2.64909e-08	9.32101e-06	0.93246	0.0213644	-0.0273028	-0.304211	-0.532147	-0.485764	-1.73903	-2.0224	-2.45999	-2.13025	-2.03119	-0.334949	SLC1A3	solute carrier family 1 (glial high affinity glutamate transporter), member 3 [Source:HGNC Symbol;Acc:HGNC:10941]
ENSGALG00000015593	-2.43278	6.53851	11.6191	0.000652776	0.0230342	1.73237	-1.56965	-1.85014	-0.525243	-2.15085	-2.00219	-1.80741	-2.64877	-1.81571	-0.89901	-1.67203	0.11244	EPHA7	Ephrin type-A receptor 7 [Source:UniProtKB/Swiss-Prot;Acc:O42422]
ENSGALG00000014813	-2.46222	1.29757	9.89012	0.00166168	0.0443897	-4.30978	-4.63319	-4.74727	-4.57282	-4.99589	-4.73635	-6.50396	-6.82038	-8.13694	-6.12615	-5.66629	-5.32969	HOMER1	homer scaffolding protein 1 [Source:HGNC Symbol;Acc:HGNC:17512]
ENSGALG00000005816	-2.4806	2.69326	10.7083	0.00106657	0.0325927	-1.87107	-2.52705	-2.53469	-2.00661	-3.14936	-3.33996	-7.36769	-5.14221	-3.70746	-3.35051	-3.59567	-2.47464	BCAR3	breast cancer anti-estrogen resistance 3 [Source:HGNC Symbol;Acc:HGNC:973]
ENSGALG00000017091	-2.48745	2.96583	9.54843	0.0020012	0.0499895	-4.16449	-3.43319	-5.06717	-4.13378	-3.87393	-3.57647	-7.25368	-9.37772	-5.40036	-4.11708	-2.93904	-1.67135	FLT1	vascular endothelial growth factor receptor 1 precursor [Source:RefSeq peptide;Acc:NP_989583]
ENSGALG00000012290	-2.50157	6.47461	10.9267	0.000947856	0.0296923	3.81419	4.85649	3.91456	3.67964	3.76008	3.62382	2.80433	1.46595	-0.951545	2.21351	-0.263522	-1.6428	SOX10	Transcription factor SOX-10 [Source:UniProtKB/Swiss-Prot;Acc:Q9W757]
ENSGALG00000023689	-2.51719	4.8374	18.8869	1.38701e-05	0.00142342	0.824883	2.03922	0.857016	1.63049	0.465822	1.20577	-0.134651	-2.97875	-1.70372	-1.36465	-2.46413	-2.43864	ASS1	argininosuccinate synthase [Source:RefSeq peptide;Acc:NP_001013413]
ENSGALG00000028048	-2.51849	5.46433	13.9127	0.000191497	0.00958652	1.95717	-0.438446	-1.23906	-0.352956	-1.64524	-1.6581	-1.24595	-2.92236	-1.61239	-0.366151	-1.28262	0.685623	PTN	pleiotrophin precursor [Source:RefSeq peptide;Acc:NP_001263291]
ENSGALG00000016834	-2.53165	4.02204	27.7124	1.40754e-07	4.22778e-05	-2.914	-2.50377	-2.78822	-2.50985	-3.63476	-2.77571	-4.87351	-5.99129	-5.12279	-3.55335	-3.5133	-2.3104	MCF2L	guanine nucleotide exchange factor DBS [Source:RefSeq peptide;Acc:NP_001238992]
ENSGALG00000015720	-2.59196	4.9876	16.9255	3.88754e-05	0.00300165	2.44623	0.262537	-0.893157	0.128686	-1.04351	-1.15795	-1.77827	-1.68238	-0.763326	0.147937	-0.805363	0.168775	CHODL	chondrolectin [Source:HGNC Symbol;Acc:HGNC:17807]
ENSGALG00000015599	-2.61351	3.32148	13.1186	0.000292374	0.012768	-0.191964	2.68609	1.21064	2.0564	1.45723	2.55326	-1.69362	-0.0528768	-1.71582	1.60746	1.6266	3.10698	SOHO-1	sensory organ homeobox protein SOHo [Source:RefSeq peptide;Acc:NP_990717]
ENSGALG00000007945	-2.75454	3.89218	10.8718	0.000976401	0.0304415	4.08593	2.79263	2.80953	2.7825	1.01502	0.995764	0.505423	1.54616	-2.01199	1.50463	-1.70758	-1.08552	CRYAB	Alpha-crystallin B chain [Source:UniProtKB/Swiss-Prot;Acc:Q05713]
ENSGALG00000017197	-2.77158	3.37288	14.7949	0.000119856	0.00692973	-3.33137	-4.63527	-5.15422	-5.51397	-6.50937	-6.30117	-5.78105	-8.02806	-8.59124	-5.21595	-6.72936	-5.80321	FAR-2	contactin-5 precursor [Source:RefSeq peptide;Acc:NP_989943]
ENSGALG00000014872	-2.78633	4.22964	11.3863	0.000739867	0.0249629	-2.11965	-0.0722563	-0.919545	-1.52776	-1.69783	-1.13684	-3.37462	-8.56828	-2.74799	-1.05614	-2.10695	-3.3454	FGF10	fibroblast growth factor 10 precursor [Source:RefSeq peptide;Acc:NP_990027]
ENSGALG00000010540	-2.79335	3.13115	14.8286	0.000117736	0.00683922	-1.59159	-0.485219	-1.81572	-2.00207	-2.11998	-1.35744	-3.27178	-7.23899	-3.60888	-2.28671	-1.69218	-2.46481	TTC39A	tetratricopeptide repeat domain 39A [Source:HGNC Symbol;Acc:HGNC:18657]
ENSGALG00000006793	-2.80383	2.38645	14.0637	0.000176722	0.00918285	-4.96391	-4.35364	-5.56726	-4.55463	-4.78993	-4.5421	-6.99487	-8.91794	-7.71056	-3.89915	-6.28273	-4.93055	NTRK3	NT-3 growth factor receptor precursor [Source:RefSeq peptide;Acc:NP_990500]
ENSGALG00000006629	-2.8136	2.49147	9.73743	0.00180553	0.0468019	1.67462	1.04785	1.522	-0.354319	-0.078115	0.196728	0.0246959	-3.24051	-4.72172	-1.21077	-2.51017	-2.86451	RBP4	Retinol-binding protein 4 [Source:UniProtKB/Swiss-Prot;Acc:P41263]
ENSGALG00000007417	-2.85799	2.78514	15.0046	0.000107248	0.00638048	-2.54545	-2.29913	-2.43239	-3.48069	-3.60456	-3.16412	-4.45505	-5.16127	-7.9629	-2.97042	-4.67574	-4.29073	ARMC4	armadillo repeat containing 4 [Source:HGNC Symbol;Acc:HGNC:25583]
ENSGALG00000008442	-2.85855	2.98087	11.8796	0.000567526	0.0210345	-4.76376	-6.25071	-6.7819	-4.77461	-5.51694	-5.4673	-7.29019	-10.7078	-9.68671	-4.1434	-6.00204	-3.651	TENM1	teneurin-1 [Source:RefSeq peptide;Acc:NP_990193]
ENSGALG00000006054	-2.8638	3.7611	9.84466	0.00170325	0.0450119	3.12795	1.40358	1.66374	2.89301	2.00243	2.67666	-0.256704	0.177511	-4.78405	-2.89029	-3.13126	0.236859	CALCA	calcitonin gene-related peptide isoform 3 preproprotein [Source:RefSeq peptide;Acc:NP_001258895]
ENSGALG00000014908	-2.92502	5.57107	17.0745	3.59417e-05	0.00283732	4.48017	1.27315	2.68341	3.75941	2.69516	2.85905	-0.14092	1.53391	-1.72212	1.33806	1.74517	2.4407	FST	Follistatin [Source:UniProtKB/Swiss-Prot;Acc:Q90844]
ENSGALG00000004043	-2.97921	2.71678	17.5126	2.85411e-05	0.00239104	-0.0831977	0.503963	0.947726	0.453806	-1.02093	-0.195843	-1.45696	-3.07356	-3.97393	-1.65882	-2.02697	-2.57277	NBL1	Neuroblastoma suppressor of tumorigenicity 1 [Source:UniProtKB/Swiss-Prot;Acc:Q90YC9]
ENSGALG00000011696	-3.11108	3.77456	12.4896	0.000409234	0.0165237	-1.57581	-1.32063	-2.41253	-1.13311	-2.332	-1.99794	-10.4192	-6.05576	-3.457	-1.48777	-2.25448	-3.11372	JAG2	jagged 2 [Source:HGNC Symbol;Acc:HGNC:6189]
ENSGALG00000027793	-3.11955	1.60034	11.3553	0.000752333	0.0251766	-2.45007	-2.84885	-3.63928	-3.2026	-2.76107	-3.36613	-6.69201	-4.87079	-8.40937	-5.37832	-3.37492	-3.24192		Sodium channel protein [Source:UniProtKB/TrEMBL;Acc:E1C4S2]
ENSGALG00000002729	-3.12166	2.79337	11.4563	0.000712513	0.0241363	-1.05761	-0.567874	-1.79858	-1.10123	-1.53531	-1.17897	-2.78417	-11.1556	-5.57197	-1.4029	-1.63011	-1.51388	GK5	Putative glycerol kinase 5 [Source:UniProtKB/Swiss-Prot;Acc:Q5ZMJ4]
ENSGALG00000005689	-3.19974	2.95019	13.2052	0.000279175	0.0125038	-2.95118	-1.95471	-2.35801	-2.34347	-3.27116	-2.62401	-4.7402	-8.94562	-5.37524	-6.14341	-3.44842	-6.48354	PAX2	paired box 2 [Source:HGNC Symbol;Acc:HGNC:8616]
ENSGALG00000009864	-3.21622	2.14099	13.6586	0.000219234	0.0103443	-1.48506	-1.28393	-1.83152	-1.15171	-1.63904	-1.0554	-7.61893	-3.8498	-4.67728	-3.77773	-1.9745	-0.955937	TRAF-5	TNF receptor-associated factor 5 [Source:RefSeq peptide;Acc:NP_989550]
ENSGALG00000020911	-3.21958	3.78053	27.066	1.96626e-07	5.50331e-05	3.7057	4.44132	3.17601	2.67793	1.62621	2.74061	1.13537	-0.121554	0.671204	2.11877	0.28902	-0.130606	CLEC19A	C-type lectin domain family 19, member A [Source:HGNC Symbol;Acc:HGNC:34522]
ENSGALG00000012421	-3.31826	1.25133	9.73391	0.00180899	0.0468019	-6.27818	-6.4888	-6.20053	-6.14553	-6.3698	-7.38987	-8.62069	-9.62803	-15.0715	-6.77696	-8.19853	-9.48025	ARHGAP15	Rho GTPase-activating protein 15 [Source:UniProtKB/Swiss-Prot;Acc:Q5ZMM3]
ENSGALG00000009324	-3.39042	1.92892	12.481	0.000411112	0.0165453	-4.6902	-4.37268	-6.28883	-5.55239	-5.24463	-5.1927	-7.03261	-9.88153	-10.0753	-7.23799	-5.69925	-4.48613	CFTR	cystic fibrosis transmembrane conductance regulator [Source:RefSeq peptide;Acc:NP_001099136]
ENSGALG00000003424	-3.39968	2.72774	11.1429	0.000843544	0.0272657	-0.897536	-0.476749	-1.64101	-1.96498	-1.23629	-1.48748	-2.96903	-8.26497	-5.70978	-4.6538	-1.58494	-4.9651	LMX1A	LIM homeobox transcription factor 1-alpha [Source:RefSeq peptide;Acc:NP_001244317]
ENSGALG00000008947	-3.40102	1.14612	10.0177	0.00155039	0.0422413	-4.7977	-5.49859	-6.53793	-5.83115	-6.47118	-5.8445	-7.93205	-8.65355	-14.097	-7.06281	-5.34769	-7.59401	PAK7	Gallus gallus p21 protein (Cdc42/Rac)-activated kinase 7 (PAK7), mRNA. [Source:RefSeq mRNA;Acc:NM_001199409]
ENSGALG00000017204	-3.51555	1.15076	9.70355	0.00183912	0.0473823	-2.91117	-1.88483	-2.64468	-1.89692	-2.35198	-2.37451	-10.6032	-10.6032	-4.37848	-2.7923	-2.67781	-2.03843	SESN3	sestrin 3 [Source:HGNC Symbol;Acc:HGNC:23060]
ENSGALG00000014875	-3.54897	1.1202	14.9241	0.000111924	0.00653373	-5.75665	-6.4018	-5.316	-5.71974	-6.80232	-6.06248	-8.2777	-10.7066	-9.96053	-6.74589	-7.37388	-6.36177	HCN1	hyperpolarization activated cyclic nucleotide gated potassium channel 1 [Source:HGNC Symbol;Acc:HGNC:4845]
ENSGALG00000010868	-3.57098	1.96715	14.6049	0.000132567	0.00738716	-3.78065	-4.68305	-5.91699	-3.4625	-4.43624	-3.42197	-7.48339	-7.50651	-11.8517	-1.90229	-0.907633	-2.56593	MACC1	metastasis associated in colon cancer 1 [Source:HGNC Symbol;Acc:HGNC:30215]
ENSGALG00000015448	-3.57215	4.32499	42.7866	6.10503e-11	7.51835e-08	-1.96205	-3.66225	-3.37088	-2.50531	-4.16218	-3.29907	-5.84898	-6.51937	-6.93021	-3.47056	-3.67762	-3.11208	TOX	thymocyte selection-associated high mobility group box protein TOX [Source:RefSeq peptide;Acc:NP_001026196]
ENSGALG00000021810	-3.57331	1.29546	9.8789	0.00167185	0.0444682	-5.84367	-6.85336	-5.35338	-5.61722	-5.76844	-6.89945	-10.7733	-8.61916	-9.72686	-12.4966	-12.7571	-7.88587		Uncharacterized protein [Source:UniProtKB/TrEMBL;Acc:E1BU94]
ENSGALG00000006202	-3.6436	0.582676	10.5073	0.00118902	0.0352487	-2.05274	-1.25709	-2.66832	-2.8623	-2.65475	-2.14226	-6.67634	-4.14453	-9.82384	-3.03276	-2.29249	-1.55775	SCNN1B	sodium channel, non voltage gated 1 beta subunit [Source:HGNC Symbol;Acc:HGNC:10600]
ENSGALG00000004857	-3.66543	0.649844	10.143	0.0014485	0.0401762	-6.17073	-7.08999	-6.28564	-7.08472	-7.66062	-5.43995	-9.23312	-10.3771	-11.4717	-6.30223	-7.75883	-10.4956	BRINP3	bone morphogenetic protein/retinoic acid inducible neural-specific 3 [Source:HGNC Symbol;Acc:HGNC:22393]
ENSGALG00000020492	-3.77824	0.756304	11.9505	0.000546339	0.020702	-4.01158	-2.99685	-3.83337	-3.99999	-4.3031	-4.55875	-7.5606	-8.80292	-6.44985	-8.2071	-4.61444	-3.87704	MUC6	mucin 6, oligomeric mucus/gel-forming [Source:HGNC Symbol;Acc:HGNC:7517]
ENSGALG00000001150	-3.9141	1.00499	17.0931	3.55905e-05	0.00283732	-6.22799	-5.40455	-7.21958	-5.55885	-6.32532	-5.13723	-10.1434	-10.1665	-9.71302	-10.7899	-11.6133	-10.5893		Uncharacterized protein [Source:UniProtKB/TrEMBL;Acc:F1P3R5]
ENSGALG00000017166	-3.96043	0.0314445	12.6984	0.00036597	0.0152764	-1.86522	-3.0678	-2.96249	-4.2936	-4.13925	-3.18368	-5.48472	-8.0359	-6.85079	-4.2732	-3.4454	-4.25027	RAB39A	RAB39A, member RAS oncogene family [Source:HGNC Symbol;Acc:HGNC:16521]
ENSGALG00000006804	-3.98978	3.28581	13.8957	0.000193242	0.00963473	-1.09077	0.93933	-0.181399	-0.305969	-1.46786	-0.450002	-11.0717	-2.43112	-5.59266	-4.50967	-3.07162	-1.70119	ODF2L	outer dense fiber of sperm tails 2-like [Source:HGNC Symbol;Acc:HGNC:29225]
ENSGALG00000016543	-4.00028	1.04652	12.2167	0.000473646	0.0185173	-3.10302	-4.20134	-5.15624	-3.83207	-5.40349	-4.92738	-9.85912	-12.1609	-6.47972	-4.3241	-4.16082	-2.97685	NHS	Nance-Horan syndrome (congenital cataracts and dental anomalies) [Source:HGNC Symbol;Acc:HGNC:7820]
ENSGALG00000012595	-4.00524	2.56454	10.7997	0.00101516	0.0314464	-1.17036	-3.36091	-2.94624	-1.88642	-5.26581	-4.22652	-9.33149	-12.479	-4.63934	-3.96009	-4.00293	-2.83727	AGTPBP1	ATP/GTP binding protein 1 [Source:HGNC Symbol;Acc:HGNC:17258]
ENSGALG00000003014	-4.05013	2.66708	17.8863	2.34508e-05	0.00204821	1.26864	1.88457	0.61731	-1.13692	1.13606	0.559066	-1.76953	-7.05445	-2.62299	-2.49379	-4.7764	-2.33167	CHRNA3	Neuronal acetylcholine receptor subunit alpha-3 [Source:UniProtKB/Swiss-Prot;Acc:P09481]
ENSGALG00000012555	-4.05672	0.606854	12.3688	0.000436576	0.0173433	-3.83996	-7.10417	-4.36738	-4.57962	-4.31037	-4.42105	-7.66257	-9.74842	-9.0845	-5.98572	-3.64937	-3.53987	CCDC148	coiled-coil domain containing 148 [Source:HGNC Symbol;Acc:HGNC:25191]
ENSGALG00000017040	-4.09914	0.0802392	10.1091	0.00147539	0.0408289	-4.5858	-4.15775	-5.37447	-5.70575	-5.13709	-7.00007	-12.1652	-12.1652	-7.20238	-4.22929	-5.81293	-5.27013		Uncharacterized protein [Source:UniProtKB/TrEMBL;Acc:F1P587]
ENSGALG00000026855	-4.11263	-0.439415	11.0391	0.000892096	0.0284615	-1.05167	-1.86403	-1.1838	-0.135438	-0.471769	-0.758894	-4.40092	-5.26599	-7.54841	-1.18574	-0.936065	-1.82243		Uncharacterized protein [Source:UniProtKB/TrEMBL;Acc:R4GFC3]
ENSGALG00000008953	-4.11395	2.569	26.6259	2.46909e-07	6.61018e-05	-2.7924	-1.88449	-1.98208	-1.959	-2.22496	-2.22312	-11.6715	-6.22804	-5.32281	-1.75811	-2.03649	-1.29179	AASS	aminoadipate-semialdehyde synthase [Source:HGNC Symbol;Acc:HGNC:17366]
ENSGALG00000017238	-4.14648	2.16023	13.1981	0.00028023	0.0125038	-3.38438	-5.20723	-6.65725	-4.88169	-7.95755	-8.91243	-8.20076	-9.27151	-8.62578	-5.81843	-9.65835	-6.24301	GRM5	metabotropic glutamate receptor 5 precursor [Source:RefSeq peptide;Acc:NP_989469]
ENSGALG00000004339	-4.1787	0.392639	9.89291	0.00165917	0.0443897	-5.67592	-5.92791	-4.81378	-6.84146	-5.98636	-4.99761	-8.90053	-9.83827	-10.0179	-4.98122	-4.72964	-12.9642	PDE8B	phosphodiesterase 8B [Source:HGNC Symbol;Acc:HGNC:8794]
ENSGALG00000008629	-4.18953	1.32343	18.272	1.91497e-05	0.00181407	-4.24527	-5.24109	-5.14841	-5.37903	-5.30464	-4.62067	-7.86219	-9.10451	-12.2305	-2.68187	-2.34847	-3.35899		Uncharacterized protein [Source:UniProtKB/TrEMBL;Acc:F1NLS1]
ENSGALG00000013606	-4.20851	1.92299	25.1285	5.3634e-07	0.000115878	-0.949677	-0.789275	-1.70026	-0.429053	-1.3949	-0.61907	-4.45402	-7.87475	-5.19435	-1.43022	-1.44073	-1.91337	FGL1	Gallus gallus fibrinogen-like 1 (FGL1), mRNA. [Source:RefSeq mRNA;Acc:NM_001277819]
ENSGALG00000003456	-4.22948	3.91395	24.903	6.02883e-07	0.000125839	0.608312	1.6306	0.289748	0.186097	-1.94735	0.453145	-2.27088	-3.31852	-7.53637	-2.083	-2.25463	-3.11492	CA12	carbonic anhydrase XII [Source:HGNC Symbol;Acc:HGNC:1371]
ENSGALG00000012123	-4.2992	3.14823	10.2003	0.00140422	0.0395719	0.737038	-1.16178	-2.45711	-0.503608	-2.25956	-4.2607	-3.09996	-10.914	-10.914	-0.446952	-1.55585	0.556742	Pax-6	Paired box protein Pax-6 [Source:UniProtKB/Swiss-Prot;Acc:P47237]
ENSGALG00000013079	-4.31074	1.21414	16.9009	3.93834e-05	0.00300165	-5.94072	-7.60472	-5.84457	-5.64967	-6.62754	-5.66782	-9.92827	-9.95065	-13.6054	-3.82577	-4.28316	-5.55358	ABCA13	ATP-binding cassette, sub-family A (ABC1), member 13 [Source:HGNC Symbol;Acc:HGNC:14638]
ENSGALG00000010943	-4.34749	0.370162	10.7268	0.00105597	0.0324297	-3.35236	-4.33166	-5.59262	-5.26397	-6.60799	-7.07853	-8.53356	-7.6009	-10.4749	-4.95222	-9.17989	-8.67484	SCN1A	sodium channel, voltage gated, type I alpha subunit [Source:HGNC Symbol;Acc:HGNC:10585]
ENSGALG00000014695	-4.35039	1.62482	14.4758	0.000141968	0.00777041	-3.44208	-3.02279	-2.68193	-3.38593	-3.35331	-2.69226	-5.77744	-11.9424	-11.9424	-4.86414	-3.58909	-2.77008	CLCN1	chloride channel, voltage-sensitive 1 [Source:HGNC Symbol;Acc:HGNC:2019]
ENSGALG00000010391	-4.35086	0.811532	14.6158	0.000131805	0.00738716	-4.31327	-5.70379	-4.79678	-3.85465	-3.24014	-3.04373	-12.1835	-7.8383	-10.0611	-5.62144	-6.99332	-4.35311	MMRN1	multimerin 1 [Source:HGNC Symbol;Acc:HGNC:7178]
ENSGALG00000021875	-4.35332	2.63625	16.8421	4.0622e-05	0.00305037	-1.07254	-4.31228	-4.24406	-2.90436	-5.10854	-5.0936	-6.68666	-6.18033	-7.63533	-2.91644	-6.29704	-5.17123		Uncharacterized protein [Source:UniProtKB/TrEMBL;Acc:E1BTN1]
ENSGALG00000028376	-4.3553	2.24759	11.7841	0.000597377	0.0216374	-0.732953	-0.722636	1.2472	0.733144	0.316635	1.27428	-2.55681	-9.35196	-7.22963	-2.78994	-2.9997	-9.35196	Fgf19	fibroblast growth factor 19 precursor [Source:RefSeq peptide;Acc:NP_990005]
ENSGALG00000012286	-4.37648	0.845682	19.904	8.14288e-06	0.000928515	-5.27617	-6.06548	-5.42867	-5.13825	-5.17414	-4.47481	-11.1653	-9.1219	-9.99952	-6.96848	-5.98696	-6.75477	AMPH	amphiphysin [Source:RefSeq peptide;Acc:NP_001004398]
ENSGALG00000002888	-4.47041	0.171097	10.4832	0.00120463	0.0355756	-4.05042	-3.97679	-6.64755	-4.60762	-8.89033	-6.84972	-8.52531	-8.16158	-12.2025	-4.34024	-4.72235	-6.35321	CASZ1	castor zinc finger 1 [Source:HGNC Symbol;Acc:HGNC:26002]
ENSGALG00000012456	-4.55086	-0.167554	9.82474	0.0017218	0.0452111	-5.33778	-4.66183	-4.00581	-3.48105	-6.09266	-3.36042	-9.94049	-7.65807	-9.94049	-1.43767	-1.80178	-3.51466	RAC2	ras-related C3 botulinum toxin substrate 2 [Source:RefSeq peptide;Acc:NP_001188381]
ENSGALG00000000894	-4.62821	2.03514	14.5339	0.000137661	0.00756829	-2.70853	-2.33227	-2.64345	-1.82574	-1.65335	-1.59598	-11.5144	-8.38841	-5.83321	-1.97363	-3.60825	-8.99815	APCDD1	Protein APCDD1 [Source:UniProtKB/Swiss-Prot;Acc:Q5R2I8]
ENSGALG00000007132	-4.64389	0.875927	14.0682	0.000176304	0.00918285	-6.47228	-2.19589	-4.42676	-3.31458	-1.40359	-2.19792	-10.5194	-7.39346	-7.57307	-2.51341	-2.38071	-2.06681	ACOX2	acyl-CoA oxidase 2, branched chain [Source:HGNC Symbol;Acc:HGNC:120]
ENSGALG00000012317	-4.65854	1.47299	11.8933	0.000563371	0.0210345	-3.79014	-4.93811	-4.91124	-3.49573	-4.13431	-4.4002	-9.29178	-7.97256	-12.9689	-12.9689	-5.34024	-3.59842	ADGB	androglobin [Source:HGNC Symbol;Acc:HGNC:21212]
ENSGALG00000000695	-4.66592	1.0273	16.1098	5.97735e-05	0.00402246	-1.69728	-1.44982	-2.81441	-2.98938	-4.4886	-3.62479	-5.64427	-10.4779	-6.32651	-1.21401	-2.18272	-4.88667	MFSD4	major facilitator superfamily domain containing 4 [Source:HGNC Symbol;Acc:HGNC:25433]
ENSGALG00000028936	-4.66679	-0.282324	11.252	0.000795364	0.0262237	-4.15792	-3.33354	-4.6693	-2.81122	-3.80034	-4.18467	-7.0767	-10.2242	-10.2242	-3.86152	-2.10211	-4.63299		Aldehyde dehydrogenase [Source:UniProtKB/TrEMBL;Acc:R4GM83]
ENSGALG00000013006	-4.72241	1.02267	13.6449	0.000220846	0.0103673	-1.14793	-1.77397	-1.14696	-0.720367	-3.066	-1.58228	-9.63264	-4.47138	-9.63264	-0.530096	-3.22448	-2.92035	ROPN1L	rhophilin associated tail protein 1-like [Source:HGNC Symbol;Acc:HGNC:24060]
ENSGALG00000003849	-4.73416	0.52477	14.0894	0.000174323	0.00913528	-5.06376	-4.90792	-5.40407	-5.88766	-6.52586	-5.90758	-8.47288	-10.8101	-13.0925	-5.97153	-4.37606	-8.47168	TRPM1	transient receptor potential cation channel, subfamily M, member 1 [Source:HGNC Symbol;Acc:HGNC:7146]
ENSGALG00000008298	-4.74263	2.23263	9.67644	0.00186646	0.0477498	-0.575793	-2.26371	-1.03986	-0.183645	-1.72254	-1.02026	-4.29445	-10.6789	-10.6789	-0.912655	-4.11494	-10.6789	P37NB	leucine-rich repeat-containing protein 17 precursor [Source:RefSeq peptide;Acc:NP_001185529]
ENSGALG00000025821	-4.74603	0.123612	10.1734	0.0014248	0.0398191	-6.83656	-1.25006	-3.00411	-1.54039	-2.63054	-1.78848	-7.66668	-5.92757	-9.96844	-9.96844	-9.96844	-9.96844	CLDN16	claudin 16 [Source:HGNC Symbol;Acc:HGNC:2037]
ENSGALG00000024306	-4.77666	1.12926	13.3625	0.000256712	0.0116657	-0.866051	-3.308	-2.87546	-2.00037	-3.51581	-2.44756	-5.22335	-10.8133	-8.69098	-7.09154	-3.02866	-3.86214		Uncharacterized protein [Source:UniProtKB/TrEMBL;Acc:F1NNB4]
ENSGALG00000026042	-4.79422	0.293626	11.7878	0.000596212	0.0216374	-0.834658	-0.0651246	0.137686	0.762981	-0.501953	-0.111776	-3.69421	-7.75791	-5.63558	-0.477569	-1.79601	-7.75791	SHISA3	shisa family member 3 [Source:HGNC Symbol;Acc:HGNC:25159]
ENSGALG00000006376	-4.84384	-0.454885	10.028	0.00154179	0.0421936	-2.59648	-3.06571	-4.30469	-6.06646	-4.08228	-5.3793	-10.898	-10.898	-6.49723	-10.898	-7.48065	-10.898	TMC3	transmembrane channel-like protein 3 [Source:RefSeq peptide;Acc:NP_001005820]
ENSGALG00000012761	-4.84889	-0.14088	12.6086	0.00038397	0.0157096	-3.17413	-3.61195	-3.30705	-3.09889	-6.14957	-3.72135	-6.63002	-10.6937	-10.6937	-4.40413	-5.16416	-3.58621	DRAM1	DNA-damage regulated autophagy modulator 1 [Source:HGNC Symbol;Acc:HGNC:25645]
ENSGALG00000015167	-4.85043	1.33531	23.8265	1.0542e-06	0.00019092	-3.9507	-4.20829	-4.55403	-5.36136	-4.97721	-4.87843	-8.53576	-8.37299	-13.3694	-5.87878	-5.5847	-7.2032	PRUNE2	prune homolog 2 (Drosophila) [Source:HGNC Symbol;Acc:HGNC:25209]
ENSGALG00000016518	-4.85721	2.4285	38.357	5.89163e-10	4.53471e-07	-2.74153	-2.82811	-3.55521	-3.05558	-3.16174	-3.47692	-7.90415	-11.9679	-6.85766	-1.64441	-1.59313	-1.47043	PHKA2	phosphorylase kinase, alpha 2 (liver) [Source:HGNC Symbol;Acc:HGNC:8926]
ENSGALG00000007012	-4.8627	2.42319	25.8418	3.70582e-07	8.45133e-05	0.213799	-0.36745	-0.458479	-0.22131	-2.24497	-1.32978	-7.72353	-3.8074	-5.87392	0.53793	-1.97166	-0.565037	ARRDC4	arrestin domain containing 4 [Source:HGNC Symbol;Acc:HGNC:28087]
ENSGALG00000012419	-4.86356	0.435825	11.8775	0.00056817	0.0210345	-0.277797	-0.236238	-0.309401	0.123922	-0.224321	0.148465	-3.92436	-7.60151	-5.47917	0.260703	0.807628	-7.60151		Uncharacterized protein [Source:UniProtKB/TrEMBL;Acc:F1NDY4]
ENSGALG00000013925	-4.8721	0.391163	10.2588	0.00136033	0.0387681	-4.66617	-4.60401	-4.6785	-4.64653	-4.62492	-4.11889	-10.1609	-10.1803	-8.6131	-5.0734	-12.4627	-12.4627	KIT	Mast/stem cell growth factor receptor Kit [Source:UniProtKB/Swiss-Prot;Acc:Q08156]
ENSGALG00000012812	-4.87414	-0.00817794	14.2708	0.000158305	0.00851322	-3.89105	-3.45816	-3.24755	-4.64515	-4.16317	-5.507	-10.8597	-6.81887	-10.8597	-2.72297	-4.11122	-4.4339	SVOPL	SVOP-like [Source:HGNC Symbol;Acc:HGNC:27034]
ENSGALG00000013568	-4.90869	0.444471	15.57	7.95048e-05	0.00504691	-3.70365	-3.85188	-4.33061	-3.65862	-3.36043	-4.60013	-11.2535	-8.97103	-7.78592	-3.63801	-2.57062	-6.16406	NR4A3	nuclear receptor subfamily 4, group A, member 3 [Source:HGNC Symbol;Acc:HGNC:7982]
ENSGALG00000003203	-4.93403	-0.612764	10.2801	0.00134475	0.0386931	-3.09319	-2.13249	-2.64806	-2.77244	-2.37678	-1.79286	-6.77159	-9.07335	-6.95102	-2.71068	-9.07335	-2.57039		Uncharacterized protein [Source:UniProtKB/TrEMBL;Acc:F1NNM9]
ENSGALG00000016934	-4.97074	-0.822307	9.99553	0.0015692	0.0426594	-2.71385	-4.81124	-3.61171	-2.11198	-3.00597	-3.34546	-6.96958	-9.27133	-9.27133	-4.857	-4.36195	-1.85391		Uncharacterized protein [Source:UniProtKB/TrEMBL;Acc:F1NY34]
ENSGALG00000001695	-5.02746	-0.247728	9.68662	0.00185614	0.0476217	-4.43602	-3.66648	-5.34344	-5.81114	-5.27198	-4.63624	-11.3593	-11.3593	-7.89174	-3.71423	-11.3593	-3.65388	GABRA6	Gamma-aminobutyric acid receptor subunit alpha-6 [Source:UniProtKB/Swiss-Prot;Acc:Q90845]
ENSGALG00000014932	-5.13926	1.06377	21.4616	3.60984e-06	0.000488519	-4.71376	-6.45698	-4.60248	-6.25298	-6.8972	-6.70085	-9.61547	-11.1091	-10.0837	-7.03224	-10.8177	-8.38585		Uncharacterized protein [Source:UniProtKB/TrEMBL;Acc:F1NTR1]
ENSGALG00000016080	-5.1514	-0.606473	11.5405	0.00068096	0.0236812	-4.82906	-3.75363	-2.21625	-3.94669	-2.25475	-2.04593	-6.87882	-9.18058	-9.18058	-2.3895	-3.65101	-2.07306	ABRA	actin-binding Rho activating protein [Source:HGNC Symbol;Acc:HGNC:30655]
ENSGALG00000025748	-5.17816	0.879308	16.6876	4.40689e-05	0.00317373	-4.49383	-3.14818	-4.49626	-2.27147	-4.10139	-2.71236	-9.55033	-7.81122	-11.8521	-8.66161	-6.53972	-11.8521	Fgf9	glia-activating factor [Source:RefSeq peptide;Acc:NP_989730]
ENSGALG00000004729	-5.23464	-0.629838	11.6203	0.000652352	0.0230342	-5.61853	-4.9814	-4.50692	-4.47434	-6.75427	-5.96357	-9.46432	-11.7661	-9.64374	-9.42563	-6.57594	-4.65856	SLC7A10	solute carrier family 7 (neutral amino acid transporter light chain, asc system), member 10 [Source:HGNC Symbol;Acc:HGNC:11058]
ENSGALG00000020873	-5.2368	0.492704	13.4747	0.000241802	0.0110766	-5.79799	-6.46138	-5.45288	-4.80082	-5.35222	-5.22337	-10.8882	-10.064	-13.19	-4.93334	-6.09643	-13.19		Uncharacterized protein [Source:UniProtKB/TrEMBL;Acc:E1BVY9]
ENSGALG00000010165	-5.26152	0.040588	16.6003	4.61436e-05	0.00328473	-2.46886	-1.88258	-3.19923	-2.03626	-2.04187	-2.25833	-6.11543	-9.79257	-9.79257	-3.36034	-4.4802	-5.17175	TCTE1	t-complex-associated-testis-expressed 1 [Source:HGNC Symbol;Acc:HGNC:11693]
ENSGALG00000001533	-5.2647	-0.233324	13.9519	0.000187551	0.00950396	-4.89134	-3.5135	-3.45668	-3.61827	-3.86637	-3.89259	-10.6821	-7.55615	-10.6821	-6.57289	-3.42741	-3.52604	TSNAXIP1	translin-associated factor X interacting protein 1 [Source:HGNC Symbol;Acc:HGNC:18586]
ENSGALG00000026486	-5.27961	2.08801	31.5138	1.98029e-08	7.17273e-06	0.0707669	0.241368	-0.837831	-0.44005	-0.705453	-0.476948	-5.92204	-6.85978	-4.40211	-4.91894	-2.89219	-1.81097	ZNF322	zinc finger protein 322 [Source:HGNC Symbol;Acc:HGNC:23640]
ENSGALG00000009957	-5.34278	1.14864	17.0833	3.57753e-05	0.00283732	-3.72105	-3.48919	-2.80093	-2.49237	-2.55976	-2.01327	-10.2178	-7.09184	-10.2178	-4.8377	-0.159488	-1.03377	TIE1	tyrosine kinase with immunoglobulin-like and EGF-like domains 1 [Source:HGNC Symbol;Acc:HGNC:11809]
ENSGALG00000029064	-5.37812	2.55033	43.3154	4.659e-11	6.37507e-08	-4.31178	-3.99784	-5.09401	-4.86903	-4.89692	-4.38411	-10.1733	-8.65956	-12.4192	-5.62066	-5.4732	-6.41472		Uncharacterized protein [Source:UniProtKB/TrEMBL;Acc:R4GH97]
ENSGALG00000006175	-5.39547	-0.649892	10.2551	0.0013631	0.0387681	-1.40813	-1.33775	-1.67288	-5.11906	-2.81607	-1.96069	-8.4636	-5.33764	-8.4636	-1.30111	-2.7453	-8.4636	DPEP1	dipeptidase 1 (renal) [Source:HGNC Symbol;Acc:HGNC:3002]
ENSGALG00000015847	-5.45015	0.787545	16.6676	4.45343e-05	0.0031886	-0.165962	-3.19082	-1.93744	-0.863328	-3.33554	-2.94758	-9.6009	-9.6009	-5.2001	-1.52804	-2.76827	-2.18348	PRSS35	protease, serine, 35 [Source:HGNC Symbol;Acc:HGNC:21387]
ENSGALG00000012613	-5.48616	1.15862	26.1227	3.20396e-07	7.58783e-05	-3.58193	-2.39503	-2.44654	-1.94559	-2.25614	-2.00125	-10.2537	-7.97129	-7.30736	-1.49934	-2.16544	-0.812928	FBP1	fructose-1,6-bisphosphatase 1 [Source:RefSeq peptide;Acc:NP_001264977]
ENSGALG00000014657	-5.48639	5.3371	35.3593	2.74163e-09	1.46796e-06	0.190998	-3.94222	-4.02691	-3.48007	-5.44777	-4.67277	-6.86748	-7.53358	-6.12262	-3.13153	-3.47489	-2.27056	ADGRV1	adhesion G protein-coupled receptor V1 [Source:HGNC Symbol;Acc:HGNC:17416]
ENSGALG00000008890	-5.50935	2.37444	36.1481	1.82877e-09	1.07244e-06	-6.13974	-3.898	-5.01707	-3.42686	-3.62609	-3.05379	-10.7143	-8.97522	-13.0161	-3.1397	-2.97535	-2.67791	ADGRL4	adhesion G protein-coupled receptor L4 [Source:HGNC Symbol;Acc:HGNC:20822]
ENSGALG00000015526	-5.5284	0.291499	14.3967	0.000148061	0.00803247	-2.07997	-2.37117	-2.2643	-2.96895	-3.24342	-1.27039	-6.19934	-9.87649	-9.87649	-2.17401	-3.4145	-7.36027	MCMDC2	minichromosome maintenance domain containing 2 [Source:HGNC Symbol;Acc:HGNC:26368]
ENSGALG00000011353	-5.56387	-0.389313	16.9671	3.80337e-05	0.00296446	-4.66024	-4.46912	-5.18821	-5.84648	-5.68255	-6.86038	-12.3791	-9.25315	-10.2568	-7.14717	-8.58086	-9.8629	TNNI3K	serine/threonine-protein kinase TNNI3K [Source:RefSeq peptide;Acc:NP_001191745]
ENSGALG00000011104	-5.65583	0.061727	11.5338	0.000683429	0.0236812	-3.69227	-10.9071	-4.02693	-3.12052	-4.91779	-3.72214	-8.6053	-10.9071	-10.9071	-5.52696	-3.59262	-2.28931	GCG	Glucagon Glicentin-related polypeptide Glucagon Glucagon-like peptide 1 Glucagon-like peptide 1(7-37) Glucagon-like peptide 1(7-36) Glucagon-like peptide 2 [Source:UniProtKB/Swiss-Prot;Acc:P68259]
ENSGALG00000004103	-5.67412	-0.410186	16.8843	3.97295e-05	0.00300165	-2.1223	-3.17769	-4.27932	-3.75456	-4.12671	-4.17448	-7.06651	-10.214	-10.214	-4.57666	-3.86174	-4.14595	FAM81A	family with sequence similarity 81, member A [Source:HGNC Symbol;Acc:HGNC:28379]
ENSGALG00000002299	-5.68552	-0.472187	12.4508	0.000417815	0.0167602	-3.81675	-3.24714	-3.49334	-3.8779	-5.27254	-5.62032	-10.7854	-7.65948	-10.7854	-3.89217	-5.15842	-10.7854	RGR	RPE-retinal G protein-coupled receptor [Source:RefSeq peptide;Acc:NP_001026387]
ENSGALG00000004849	-5.73335	0.120278	11.8285	0.000583295	0.0212523	-3.5444	-1.41847	-3.49083	-4.99891	-4.33495	-4.34676	-6.61803	-10.6817	-10.6817	-3.15891	-6.58244	-10.6817	WSCD2	WSC domain containing 2 [Source:HGNC Symbol;Acc:HGNC:29117]
ENSGALG00000026200	-5.7485	1.85603	29.4486	5.74187e-08	1.91111e-05	-3.7544	-2.84363	-4.14595	-3.67583	-4.8605	-4.26961	-8.41211	-9.65442	-9.83403	-2.89776	-3.79228	-6.71233	FAM134B	family with sequence similarity 134, member B [Source:HGNC Symbol;Acc:HGNC:25964]
ENSGALG00000016507	-5.76239	-0.345893	12.1458	0.000491989	0.0191736	-3.4245	-1.84151	-3.65345	-2.40553	-2.38724	-2.52355	-9.31307	-7.03065	-9.31307	-2.52199	-1.80712	-9.31307	FNDC4	fibronectin type III domain containing 4 [Source:HGNC Symbol;Acc:HGNC:20239]
ENSGALG00000002118	-5.77859	0.418086	10.6813	0.00108225	0.0329084	-9.87284	-3.78045	-5.95093	-9.87284	-9.87284	-7.29199	-9.87284	-9.87284	-9.87284	-0.472555	-2.24415	-0.412586	CO6	calcium-activated potassium channel subunit beta-1 [Source:RefSeq peptide;Acc:NP_989933]
ENSGALG00000013869	-5.7813	0.332301	15.11	0.000101424	0.00618338	-2.80601	-3.12387	-4.31684	-4.72521	-3.38709	-4.13518	-11.1076	-8.82514	-8.16121	-3.49212	-3.24081	-11.1076	IL20RA	interleukin 20 receptor, alpha [Source:HGNC Symbol;Acc:HGNC:6003]
ENSGALG00000010583	-5.7919	-0.089183	10.2921	0.00133598	0.0385307	-3.7181	-5.60908	-6.13929	-5.62249	-9.7046	-6.80239	-12.1551	-9.02916	-12.1551	-5.86553	-3.64035	-12.1551	VIT	vitrin precursor [Source:RefSeq peptide;Acc:NP_001019751]
ENSGALG00000015795	-5.79516	0.450958	17.2284	3.31445e-05	0.00268536	-5.903	-5.50451	-3.63791	-5.44827	-6.68614	-4.9159	-8.90305	-12.0505	-12.0505	-2.73977	-5.10027	-4.99329	ADAMTS5	ADAM metallopeptidase with thrombospondin type 1 motif, 5 [Source:HGNC Symbol;Acc:HGNC:221]
ENSGALG00000008570	-5.80032	-1.18336	11.5592	0.000674149	0.0235856	-7.11497	-4.59184	-4.67383	-5.04898	-7.17354	-5.67816	-9.41593	-11.7177	-11.7177	-11.7177	-11.7177	-11.7177	MOV10L1	Mov10 RISC complex RNA helicase like 1 [Source:HGNC Symbol;Acc:HGNC:7201]
ENSGALG00000005348	-5.82504	0.59145	17.0418	3.65663e-05	0.00286824	-5.39083	-2.66913	-3.78215	-3.99284	-3.64079	-3.17891	-7.90567	-10.2074	-10.2074	-2.42288	-0.42769	-3.31237	RBBP8NL	RBBP8 N-terminal like [Source:HGNC Symbol;Acc:HGNC:16144]
ENSGALG00000010252	-5.8488	-0.201632	11.3019	0.000774283	0.0257016	-3.00897	-4.46639	-4.89916	-7.21423	-5.54697	-2.94898	-8.25702	-10.5588	-10.5588	-4.42748	-1.95753	-7.17451	KRT80	keratin 80, type II [Source:HGNC Symbol;Acc:HGNC:27056]
ENSGALG00000000653	-5.93422	1.17913	21.1624	4.21969e-06	0.000541308	-2.42161	-1.50511	-4.52179	-2.60623	-2.28037	-3.74	-6.94424	-11.3125	-9.19018	-5.56192	-3.91287	-7.39009	CNTN2	contactin-2 precursor [Source:RefSeq peptide;Acc:NP_001004395]
ENSGALG00000006106	-5.95407	-0.734932	12.5022	0.000406469	0.016466	-2.95525	-1.02542	-4.24753	-3.38728	-1.95754	-1.15243	-6.63365	-8.93541	-8.93541	-8.93541	-8.93541	-8.93541		Uncharacterized protein [Source:UniProtKB/TrEMBL;Acc:F1NCY6]
ENSGALG00000026333	-5.95536	-1.04389	10.4482	0.00122769	0.0359977	-1.87517	-5.56237	-3.46666	-4.5969	-1.67608	-3.55383	-7.94145	-7.94145	-7.94145	-0.699325	-2.22314	-0.738391	GNGT2	guanine nucleotide binding protein (G protein), gamma transducing activity polypeptide 2 [Source:HGNC Symbol;Acc:HGNC:4412]
ENSGALG00000009050	-5.95982	0.0374418	10.5999	0.00113094	0.034085	-4.6508	-3.99456	-5.56533	-5.02167	-5.05722	-5.80386	-11.3226	-11.3226	-9.20025	-1.84624	-7.22329	-11.3226	CAPN3	calpain-3 [Source:RefSeq peptide;Acc:NP_001004405]
ENSGALG00000016721	-5.98272	-0.268191	10.5926	0.00113541	0.034085	-5.14694	-3.94834	-3.81846	-3.73287	-6.39356	-4.43481	-10.9377	-10.9377	-8.81538	-2.31104	-6.83842	-10.9377	PLCXD1	PI-PLC X domain-containing protein 1 [Source:RefSeq peptide;Acc:NP_001122109]
ENSGALG00000015658	-5.9841	-0.632816	14.1476	0.000169012	0.008933	-2.03515	-2.36948	-3.80396	-2.29502	-4.56201	-4.19373	-9.35886	-7.07644	-9.35886	-4.47856	-2.13497	-4.48481	GDAP1	ganglioside induced differentiation associated protein 1 [Source:HGNC Symbol;Acc:HGNC:15968]
ENSGALG00000010933	-5.98797	0.718112	16.5684	4.69263e-05	0.00332125	-3.24931	-5.98872	-4.98193	-4.7702	-7.60195	-5.48484	-8.72166	-12.3988	-12.3988	-3.07882	-7.08643	-4.79478		Uncharacterized protein [Source:UniProtKB/TrEMBL;Acc:F1NSM0]
ENSGALG00000001869	-6.02093	-0.692516	12.0874	0.000507629	0.0195358	-2.30331	-1.93466	-4.60496	-2.38515	-0.985974	-0.896014	-7.61904	-7.61904	-7.61904	-0.630335	0.00964208	-2.02784	LINGO2	leucine rich repeat and Ig domain containing 2 [Source:HGNC Symbol;Acc:HGNC:21207]
ENSGALG00000007573	-6.03427	0.647274	22.7647	1.83097e-06	0.000289083	-2.72771	-1.76424	-3.02648	-5.18771	-4.2866	-4.18391	-8.06493	-7.55767	-11.2124	-6.7981	-5.68286	-3.54004	STK32A	serine/threonine-protein kinase 32A [Source:RefSeq peptide;Acc:NP_001020782]
ENSGALG00000003595	-6.0557	-0.525895	11.1905	0.000822182	0.0267862	-5.07454	-2.78471	-6.93923	-3.88779	-3.35102	-3.60295	-9.12168	-9.12168	-9.12168	-4.24139	-1.21556	-0.833632	SARM1	sterile alpha and TIR motif containing 1 [Source:HGNC Symbol;Acc:HGNC:17074]
ENSGALG00000005975	-6.0655	-0.191363	10.7131	0.0010638	0.0325888	-2.96538	-5.93264	-4.43403	-2.70502	-5.08866	-5.50659	-10.8593	-8.5769	-10.8593	-2.66137	-6.11387	-10.8593	ZNF488	zinc finger protein 488 [Source:HGNC Symbol;Acc:HGNC:23535]
ENSGALG00000016740	-6.09856	1.39033	21.289	3.95001e-06	0.000528744	-4.92844	-4.23393	-6.29064	-4.88764	-5.22163	-5.21569	-11.726	-9.98687	-11.9054	-10.8373	-6.42278	-11.5115	OCA2	Uncharacterized protein [Source:UniProtKB/TrEMBL;Acc:F1NES9]
ENSGALG00000006973	-6.11242	2.76286	22.8314	1.76855e-06	0.000282853	-2.59982	-2.38417	-3.62762	-2.75881	-4.63127	-2.84877	-7.58259	-10.1598	-11.1634	-13.2857	-4.3161	-4.18609	BLNK	B-cell linker protein [Source:UniProtKB/Swiss-Prot;Acc:Q9YGC1]
ENSGALG00000003611	-6.12454	1.00913	24.3253	8.13618e-07	0.000154149	-2.30381	-2.01216	-1.38735	-1.86492	-1.32548	-1.09088	-9.99585	-9.99585	-6.52831	-4.24525	-1.43103	-3.73784		Uncharacterized protein [Source:UniProtKB/TrEMBL;Acc:E1BXH8]
ENSGALG00000009514	-6.13987	3.81709	40.3821	2.0885e-10	2.14332e-07	-1.88793	-3.22481	-3.92675	-1.93637	-4.90416	-3.92774	-9.29187	-7.85179	-10.9651	-2.13977	-4.80883	-3.19182	NRCAM	neuronal cell adhesion molecule [Source:HGNC Symbol;Acc:HGNC:7994]
ENSGALG00000014793	-6.14342	-0.430239	18.98	1.32094e-05	0.00136701	-4.32965	-4.77562	-4.34126	-4.47758	-4.26152	-5.86639	-11.3851	-11.3851	-9.26279	-5.43166	-5.28104	-5.04076		Uncharacterized protein [Source:UniProtKB/TrEMBL;Acc:E1C8K8]
ENSGALG00000027633	-6.15158	1.88309	39.6391	3.05503e-10	2.89405e-07	-3.113	-3.78272	-3.73878	-2.80542	-3.90836	-2.62987	-11.7177	-9.43527	-8.77134	-2.37044	-1.80156	-1.83328	RASSF9	Ras association (RalGDS/AF-6) domain family (N-terminal) member 9 [Source:HGNC Symbol;Acc:HGNC:15739]
ENSGALG00000025876	-6.16666	-0.654389	13.6401	0.000221405	0.0103673	-3.48414	-1.93289	-2.96214	-1.30302	-0.909821	-1.41427	-7.83565	-7.83565	-7.83565	-1.70435	-1.48339	-0.163263	Tpo	thrombopoietin precursor [Source:RefSeq peptide;Acc:NP_001001784]
ENSGALG00000010736	-6.18083	-0.191268	19.2358	1.15527e-05	0.00122648	-2.83172	-1.51789	-2.13335	-1.89683	-3.17209	-3.38861	-9.05619	-6.77377	-9.05619	-1.93522	-1.57609	-2.55324	DIO1	Gallus gallus deiodinase, iodothyronine, type I (DIO1), mRNA. [Source:RefSeq mRNA;Acc:NM_001097614]
ENSGALG00000005502	-6.22727	0.625684	17.8995	2.32879e-05	0.00204821	-2.70129	-5.82466	-4.10605	-3.33836	-4.11826	-3.03515	-8.44957	-10.7513	-10.7513	-5.00074	-2.68028	-1.20659	cKv6.3	Uncharacterized protein [Source:UniProtKB/TrEMBL;Acc:E1BQU8]
ENSGALG00000026902	-6.23593	0.0636991	20.127	7.24665e-06	0.000849929	-0.712005	-2.8316	-1.98403	-0.700418	-1.99624	-1.05679	-6.32755	-8.6293	-8.6293	-1.83822	-1.92477	-1.47323	P2RX6	purinergic receptor P2X, ligand gated ion channel, 6 [Source:HGNC Symbol;Acc:HGNC:8538]
ENSGALG00000015528	-6.23712	0.350868	18.731	1.50512e-05	0.00151931	-5.26496	-4.33894	-5.95051	-6.41391	-8.07651	-6.72848	-9.72586	-12.8734	-12.8734	-6.66074	-6.70311	-3.71294	JAKMIP1	janus kinase and microtubule interacting protein 1 [Source:HGNC Symbol;Acc:HGNC:26460]
ENSGALG00000026345	-6.25257	0.112701	17.8309	2.41427e-05	0.0020647	-4.4853	-3.26026	-4.49854	-3.69032	-5.7832	-3.52753	-10.9821	-10.9821	-8.85972	-5.4676	-3.63865	-2.43538	GMIP	GEM interacting protein [Source:HGNC Symbol;Acc:HGNC:24852]
ENSGALG00000002829	-6.3496	0.238122	16.1105	5.97506e-05	0.00402246	-5.07566	-3.12211	-3.68082	-2.21526	-2.55615	-2.20884	-9.1228	-9.1228	-9.1228	-2.08864	-0.249173	-0.540149	SCARF1	scavenger receptor class F, member 1 [Source:HGNC Symbol;Acc:HGNC:16820]
ENSGALG00000013659	-6.43713	1.48632	20.3026	6.61118e-06	0.000791734	-1.84514	-2.84453	-5.54819	-1.539	-3.56228	-5.93395	-7.90977	-11.9735	-9.85114	-9.63304	-11.9735	-11.9735	NOX3	NADPH oxidase 3 [Source:HGNC Symbol;Acc:HGNC:7890]
ENSGALG00000021570	-6.45522	-0.202758	18.2984	1.88861e-05	0.00180767	-0.422806	0.936224	-0.669302	0.393903	-1.10531	-1.92947	-7.09459	-7.09459	-4.97225	-0.152809	-1.90445	0.322834	ZBTB6	zinc finger and BTB domain-containing protein 6 [Source:RefSeq peptide;Acc:NP_001264570]
ENSGALG00000011202	-6.46079	-0.667206	11.2494	0.000796485	0.0262237	-4.92033	-7.71163	-6.78993	-4.57027	-6.11341	-4.68829	-11.4778	-11.4778	-11.4778	-4.3996	-3.94647	-11.4778	COLQ	collagen-like tail subunit (single strand of homotrimer) of asymmetric acetylcholinesterase [Source:HGNC Symbol;Acc:HGNC:2226]
ENSGALG00000001242	-6.46656	-0.705701	11.1214	0.000853381	0.0275115	-4.57309	-2.21015	-3.58227	-1.50784	-2.63096	-3.92454	-8.62023	-8.62023	-8.62023	-1.00479	-1.42784	-8.62023		Uncharacterized protein [Source:UniProtKB/TrEMBL;Acc:H9KYZ6]
ENSGALG00000003432	-6.47047	-0.868002	12.433	0.000421811	0.0168656	-4.03218	-5.68704	-5.71132	-2.7706	-3.47338	-3.81913	-10.3992	-10.3992	-10.3992	-4.64861	-4.97415	-10.3992	AGXT2	alanine--glyoxylate aminotransferase 2 [Source:HGNC Symbol;Acc:HGNC:14412]
ENSGALG00000005011	-6.47253	0.632992	31.6791	1.81866e-08	6.7869e-06	-2.73681	-2.57075	-3.71514	-3.75838	-4.28316	-4.47987	-9.15049	-11.4523	-8.5059	-4.55898	-4.70374	-4.61558	SHC4	SHC (Src homology 2 domain containing) family, member 4 [Source:HGNC Symbol;Acc:HGNC:16743]
ENSGALG00000004880	-6.4767	0.763859	18.4115	1.77982e-05	0.00172587	-2.47105	-4.28887	-4.65926	-4.2061	-3.54182	-3.89325	-11.5394	-8.41343	-11.5394	-9.19895	-3.15792	-3.06747	SYCP2	synaptonemal complex protein 2 [Source:HGNC Symbol;Acc:HGNC:11490]
ENSGALG00000020292	-6.47894	-0.79027	16.8097	4.13216e-05	0.00308409	-5.18368	-3.83991	-4.83513	-5.67667	-5.53408	-6.28072	-9.49769	-11.7994	-11.7994	-11.7994	-11.7994	-11.7994	GABRE	Gamma-aminobutyric acid receptor subunit gamma-4 [Source:UniProtKB/Swiss-Prot;Acc:P34904]
ENSGALG00000027789	-6.5447	-0.569472	15.0679	0.000103712	0.00620004	-3.51232	-3.77123	-3.64328	-2.59591	-3.68528	-4.50249	-9.19818	-9.19818	-9.19818	-3.34259	-1.9133	-1.09591	RAB37	RAB37, member RAS oncogene family [Source:HGNC Symbol;Acc:HGNC:30268]
ENSGALG00000001933	-6.56598	-0.739276	9.61366	0.00193135	0.0489395	-4.59415	-10.6604	-4.42539	-3.28675	-6.81259	-4.73455	-10.6604	-10.6604	-10.6604	-10.6604	-3.46804	-3.28341	CORO2A	coronin, actin binding protein, 2A [Source:HGNC Symbol;Acc:HGNC:2255]
ENSGALG00000023356	-6.57925	0.0344697	10.9653	0.000928317	0.0292384	-4.26702	-8.42195	-9.21221	-9.25275	-10.6836	-8.18471	-10.8324	-13.1341	-13.1341	-4.26244	-13.1341	-5.3649		Uncharacterized protein [Source:UniProtKB/TrEMBL;Acc:F1P4Z3]
ENSGALG00000028341	-6.58918	-0.684399	13.7193	0.000212266	0.0100929	-3.63237	-2.2344	-2.3864	-5.75509	-2.24582	-1.05017	-8.23509	-8.23509	-8.23509	-1.554	-1.0749	-1.28391	MADCAM1	mucosal vascular addressin cell adhesion molecule 1 [Source:HGNC Symbol;Acc:HGNC:6765]
ENSGALG00000028459	-6.58981	-0.192439	13.8401	0.000199039	0.00972682	-5.47493	-3.94917	-3.91521	-5.39849	-5.35262	-4.32927	-9.39764	-11.6994	-11.6994	-7.28507	-11.6994	-3.96174	FAM180A	FAM180A protein [Source:UniProtKB/TrEMBL;Acc:G1E6K3]
ENSGALG00000023439	-6.72894	-0.67716	14.9408	0.000110939	0.00653373	-5.05157	-3.38851	-4.4262	-1.88607	-3.78088	-2.8958	-9.86818	-9.86818	-9.86818	-5.20213	-3.30423	-5.5547	DFNB59	deafness, autosomal recessive 59 [Source:HGNC Symbol;Acc:HGNC:29502]
ENSGALG00000028576	-6.77134	0.235569	15.2373	9.48105e-05	0.00589693	-1.96633	-2.69134	-0.0195628	-1.57964	-1.09925	-0.463335	-6.39027	-8.69203	-8.69203	-8.69203	-3.78264	-0.891923	PAX1	paired box 1 [Source:HGNC Symbol;Acc:HGNC:8615]
ENSGALG00000014994	-6.77899	0.0887704	23.4163	1.30466e-06	0.000226294	-2.45714	-0.570344	-2.32308	-2.97457	-3.18554	-3.84258	-7.58035	-7.59969	-9.88211	-9.88211	-7.80214	-7.36589		Uncharacterized protein [Source:UniProtKB/TrEMBL;Acc:E1C1R3]
ENSGALG00000021714	-6.80456	0.0317099	15.8542	6.84153e-05	0.00443439	-1.86576	-0.754484	-3.73606	-6.15597	-4.26668	-5.64973	-7.73558	-10.0373	-7.91501	-5.62301	-10.0373	-2.88127	PADI1	Peptidylarginine deiminase type I [Source:UniProtKB/TrEMBL;Acc:E1C0W6]
ENSGALG00000000371	-6.81233	0.0712453	16.6947	4.39034e-05	0.00317373	-6.45999	-1.9222	-3.9038	-5.34005	-3.87004	-5.9441	-11.4628	-11.4628	-8.51648	-11.4628	-8.56443	-11.4628	CRHR1	corticotropin-releasing factor receptor 1 precursor [Source:RefSeq peptide;Acc:NP_989652]
ENSGALG00000006203	-6.84874	-0.703411	16.2783	5.46862e-05	0.00378348	-2.78456	-5.3558	-3.85065	-2.54872	-3.42297	-2.65718	-9.51027	-9.51027	-9.51027	-3.75967	-2.89792	-3.00731	C20orf96	chromosome 20 open reading frame 96 [Source:HGNC Symbol;Acc:HGNC:16227]
ENSGALG00000011706	-6.90106	-0.834818	11.454	0.000713406	0.0241363	-2.23587	-5.1954	-3.0269	-0.979469	-4.72397	-3.294	-8.96158	-8.96158	-8.96158	-2.1185	-8.96158	-3.51906	ACKR4	atypical chemokine receptor 4 [Source:HGNC Symbol;Acc:HGNC:1611]
ENSGALG00000005474	-6.98855	-0.211665	15.1682	9.83472e-05	0.00608616	-6.64131	-2.31954	-2.44553	-1.40422	-3.56463	-2.88951	-8.92904	-8.92904	-8.92904	-0.509394	-1.70515	-2.96625	PNAT10	arylamine N-acetyltransferase, pineal gland isozyme NAT-10 [Source:RefSeq peptide;Acc:NP_990671]
ENSGALG00000011358	-6.98943	-1.27246	11.6992	0.000625264	0.0224493	-3.69613	-2.97773	-5.8405	-4.93083	-6.45028	-4.24367	-9.7624	-9.7624	-9.7624	-2.55955	-4.85302	-9.7624	Wnt6	Gallus gallus wingless-type MMTV integration site family, member 6 (WNT6), mRNA. [Source:RefSeq mRNA;Acc:NM_001007594]
ENSGALG00000019211	-6.98994	-0.590153	15.5938	7.85136e-05	0.00500982	-3.1762	-6.23788	-3.98823	-3.09652	-5.20721	-5.61645	-10.0041	-10.0041	-10.0041	-2.38862	-3.39171	-3.05288	MAEL	maelstrom spermatogenic transposon silencer [Source:HGNC Symbol;Acc:HGNC:25929]
ENSGALG00000027720	-7.02568	0.498844	28.7662	8.16648e-08	2.57872e-05	-2.68448	-1.38416	-2.06849	-1.47335	-2.80359	-1.70424	-9.78146	-7.49904	-9.78146	-3.15868	-2.49658	-2.94479	OTX2	homeobox protein OTX2 [Source:RefSeq peptide;Acc:NP_989851]
ENSGALG00000009562	-7.04546	1.05288	22.5915	2.00373e-06	0.000308449	-0.878012	-1.2241	-1.5836	-1.96441	-1.5868	-3.18471	-9.83803	-6.71207	-9.83803	-7.49759	-1.80204	-0.854682	PLEK2	pleckstrin-2 [Source:RefSeq peptide;Acc:NP_001264366]
ENSGALG00000010513	-7.0529	0.116517	12.0213	0.000525964	0.0200534	-3.44043	-5.99793	-2.14916	-0.902401	-3.86681	-3.42871	-9.23121	-9.23121	-9.23121	0.0326483	-2.71734	-9.23121	TCTN3	tectonic-3 [Source:RefSeq peptide;Acc:NP_001098788]
ENSGALG00000014987	-7.06378	0.0632436	14.6419	0.000129992	0.00735485	-5.90488	-4.60483	-3.62746	-1.7094	-4.32852	-4.98886	-10.5076	-10.5076	-10.5076	-7.31711	-2.30426	-2.8022	OTOP1	otopetrin 1 [Source:HGNC Symbol;Acc:HGNC:19656]
ENSGALG00000005258	-7.07714	-1.44283	9.93867	0.00161843	0.0436126	-1.29262	0.385177	-4.68289	-2.98397	-6.86534	-2.86997	-6.86534	-6.86534	-6.86534	-6.86534	-2.11989	0.290732	SS5R	somatostatin receptor type 5 [Source:RefSeq peptide;Acc:NP_001020005]
ENSGALG00000003951	-7.0978	-0.729882	10.6645	0.0010921	0.0331262	-3.67232	-3.56141	-1.79621	-8.84008	-5.52795	-2.33717	-8.84008	-8.84008	-8.84008	-8.84008	-1.92795	-0.737802	SASH3	SAM and SH3 domain-containing protein 3 [Source:RefSeq peptide;Acc:NP_001026281]
ENSGALG00000028207	-7.16239	-0.757733	11.0099	0.000906283	0.0287651	-5.04057	-10.6133	-3.22661	-3.45393	-10.6133	-5.26055	-10.6133	-10.6133	-10.6133	-5.94724	-3.8221	-3.45721	ZBBX	zinc finger, B-box domain containing [Source:HGNC Symbol;Acc:HGNC:26245]
ENSGALG00000005305	-7.18	-0.357137	13.8151	0.000201704	0.00981813	-0.376959	-7.70067	-1.85197	-0.408934	-3.46306	-0.618108	-7.70067	-7.70067	-7.70067	-0.807393	-1.89651	0.27204	ACKR2	atypical chemokine receptor 2 [Source:HGNC Symbol;Acc:HGNC:1565]
ENSGALG00000004128	-7.19941	-0.739308	15.3973	8.71105e-05	0.00550136	-0.712353	0.389984	-3.24038	0.0144337	-1.76682	0.193749	-6.77863	-6.77863	-6.77863	-2.66941	-0.16628	-0.0663415	CYSLTR1	cysteinyl leukotriene receptor 1 [Source:HGNC Symbol;Acc:HGNC:17451]
ENSGALG00000007388	-7.22639	-0.463832	14.5714	0.000134947	0.00748592	-5.07642	-5.35105	-5.2084	-3.6569	-4.5716	-4.47106	-11.4434	-11.4434	-11.4434	-4.01959	-7.34415	-11.4434		Uncharacterized protein [Source:UniProtKB/TrEMBL;Acc:E1C6U3]
ENSGALG00000023296	-7.23217	0.156096	19.3719	1.07581e-05	0.00115205	-2.2783	-3.5761	-1.57993	-3.45606	-1.80621	-0.594802	-8.50277	-8.50277	-8.50277	-0.519756	-1.21789	0.0439047	SCL	Gallus gallus T-cell acute lymphocytic leukemia 1 (TAL1), mRNA. [Source:RefSeq mRNA;Acc:NM_205352]
ENSGALG00000017398	-7.26837	1.11158	11.3268	0.000763964	0.0254276	-0.204573	-3.00411	-4.54949	-1.948	-10.9141	-4.49272	-10.9141	-7.25934	-10.9141	-10.9141	-4.12291	-10.9141		Uncharacterized protein [Source:UniProtKB/TrEMBL;Acc:F1NTQ4]
ENSGALG00000024466	-7.31492	-0.524842	14.5499	0.000136497	0.00753796	-1.47437	0.458223	-3.50884	-1.36427	1.16122	0.599044	-7.04709	-7.04709	-7.04709	-1.98029	-2.13771	-7.04709		C-C motif chemokine [Source:UniProtKB/TrEMBL;Acc:E1BSY1]
ENSGALG00000000820	-7.3341	-0.656808	16.3441	5.28204e-05	0.00367505	-0.792	-0.760935	-0.294264	-0.480094	-2.39539	-2.24385	-6.93954	-6.93954	-6.93954	0.871361	-0.148356	-3.55527	HTR1D	5-hydroxytryptamine (serotonin) receptor 1D, G protein-coupled [Source:HGNC Symbol;Acc:HGNC:5289]
ENSGALG00000026727	-7.33909	-0.179227	16.2214	5.63529e-05	0.00387702	-8.93171	-3.68113	-5.46218	-5.29993	-3.29955	-6.05431	-11.2194	-11.2194	-11.2194	-3.97732	-3.84764	-3.80201	SLC30A10	solute carrier family 30, member 10 [Source:HGNC Symbol;Acc:HGNC:25355]
ENSGALG00000003005	-7.33919	0.683516	15.8265	6.94217e-05	0.00447606	-4.49629	-1.6742	-2.0489	-2.66029	-1.68481	-2.11069	-10.4764	-8.19403	-10.4764	-3.0526	-10.4764	-10.4764	CHRNB4	neuronal acetylcholine receptor subunit beta-4 precursor [Source:RefSeq peptide;Acc:NP_990150]
ENSGALG00000026733	-7.34242	-1.06531	11.9317	0.000551864	0.0208472	-2.26229	-3.34094	-2.97303	-3.11392	-3.93979	-3.7859	-9.13864	-9.13864	-9.13864	-9.13864	-2.11494	-9.13864	FFAR4	free fatty acid receptor 4 [Source:HGNC Symbol;Acc:HGNC:19061]
ENSGALG00000004632	-7.35227	-0.674986	14.7528	0.000122566	0.00702046	-1.72309	-0.254151	-0.44548	-1.63928	-0.405757	-1.23632	-7.03882	-7.03882	-7.03882	-7.03882	0.388142	-0.326536		Uncharacterized protein [Source:UniProtKB/TrEMBL;Acc:F1NJJ7]
ENSGALG00000006003	-7.36832	0.0786948	17.8448	2.39674e-05	0.00206405	-2.19711	-2.22716	-2.13885	-3.33025	-8.56414	-2.52461	-8.56414	-8.56414	-8.56414	-0.861663	-1.43688	0.68849		Uncharacterized protein [Source:UniProtKB/TrEMBL;Acc:E1C6S6]
ENSGALG00000022696	-7.37036	-0.455274	15.0836	0.000102853	0.00620004	-2.27611	-0.120293	-2.55389	-0.68431	-4.27973	-2.42673	-7.59185	-7.59185	-7.59185	-2.71155	-1.48777	0.972925	KCNE3	potassium channel, voltage gated subfamily E regulatory beta subunit 3 [Source:HGNC Symbol;Acc:HGNC:6243]
ENSGALG00000014267	-7.39102	-1.08458	10.937	0.000942614	0.029613	-7.12056	-2.41891	-2.48545	-3.86016	-9.40829	-5.02067	-9.40829	-9.40829	-9.40829	-9.40829	-3.52311	-2.20523	RBM47	RNA binding motif protein 47 [Source:HGNC Symbol;Acc:HGNC:30358]
ENSGALG00000011344	-7.40785	-0.0191313	10.5914	0.00113617	0.034085	0.367745	-7.42877	-2.39081	-0.0954812	-0.931754	-4.84792	-7.42877	-7.42877	-7.42877	1.82552	-1.32469	-7.42877	TTLL2	tubulin tyrosine ligase-like family member 2 [Source:HGNC Symbol;Acc:HGNC:21211]
ENSGALG00000010417	-7.43081	-0.383638	13.1313	0.000290406	0.0127393	-3.59841	-3.42487	-4.0025	-3.03132	-4.10588	-4.42757	-10.0952	-10.0952	-10.0952	-10.0952	-6.67778	-1.34498		vitamin D3 hydroxylase-associated protein [Source:RefSeq peptide;Acc:NP_990307]
ENSGALG00000014759	-7.46025	0.338391	22.4267	2.1832e-06	0.00032788	-5.27458	-3.35925	-4.87583	-3.93146	-3.74665	-2.8468	-10.7245	-10.7245	-10.7245	-3.6463	-2.50547	-2.05567	STYK1	serine/threonine/tyrosine kinase 1 [Source:HGNC Symbol;Acc:HGNC:18889]
ENSGALG00000011616	-7.49985	0.0793993	19.5021	1.00491e-05	0.00109628	-1.96806	-2.54194	-2.33513	-5.02462	-5.20835	-3.49019	-10.5728	-8.29033	-10.5728	-4.07417	-7.67435	-10.5728	NPFFR2	neuropeptide FF receptor 2 [Source:RefSeq peptide;Acc:NP_001029997]
ENSGALG00000019233	-7.51181	-0.799456	16.1496	5.85323e-05	0.00398246	-3.62089	-4.22354	-4.69894	-4.25127	-5.83678	-7.17868	-10.6336	-10.6336	-10.6336	-2.90327	-5.72424	-6.32015		Uncharacterized protein [Source:UniProtKB/TrEMBL;Acc:E1C202]
ENSGALG00000013723	-7.515	-0.712461	15.3459	8.95145e-05	0.00562434	-2.90044	-0.31547	-1.41576	-1.91103	-0.461085	-1.21414	-7.71704	-7.71704	-7.71704	-7.71704	-1.25506	-1.99106	OAS*A	59 kDa 2'-5'-oligoadenylate synthase-like protein [Source:RefSeq peptide;Acc:NP_990372]
ENSGALG00000006236	-7.5573	0.230292	21.1981	4.14183e-06	0.000540164	-3.93215	-4.35892	-2.89747	-3.85571	-2.59761	-2.51049	-10.1566	-10.1566	-10.1566	-1.18812	-3.86252	-3.20544	TPH1	Tryptophan 5-hydroxylase 1 [Source:UniProtKB/Swiss-Prot;Acc:P70080]
ENSGALG00000008514	-7.56029	-0.593959	11.5831	0.000665545	0.023351	-9.91684	-2.00685	-4.47487	-4.23402	-4.14618	-3.33677	-9.91684	-9.91684	-9.91684	-7.5764	-1.88085	-7.40063	DLL4	delta-like 4 (Drosophila) [Source:HGNC Symbol;Acc:HGNC:2910]
ENSGALG00000009488	-7.60636	-0.874424	12.3391	0.00044358	0.0174527	-1.54562	-1.66452	-0.687609	-2.295	-0.4277	-4.38819	-7.84313	-7.84313	-7.84313	-7.84313	-1.38115	-7.84313	LRRN3	leucine rich repeat neuronal 3 [Source:HGNC Symbol;Acc:HGNC:17200]
ENSGALG00000012117	-7.68185	-0.189231	18.2151	1.97305e-05	0.00185481	-4.13089	-2.96214	-5.69073	-7.21969	-3.22634	-5.04551	-10.5642	-10.5642	-10.5642	-2.36629	-4.33074	-3.14682	STEAP3	STEAP family member 3, metalloreductase [Source:HGNC Symbol;Acc:HGNC:24592]
ENSGALG00000002643	-7.71246	-0.767036	16.059	6.13977e-05	0.00410931	-3.3363	-2.76793	-3.52916	-4.65989	-2.96795	-4.2262	-9.89378	-9.89378	-9.89378	-9.89378	-4.58141	-2.9426	SELP	selectin P (granule membrane protein 140kDa, antigen CD62) [Source:HGNC Symbol;Acc:HGNC:10721]
ENSGALG00000007487	-7.74118	-0.714328	16.7048	4.36693e-05	0.00317373	-4.06131	-2.5623	-3.06137	-2.43911	-3.58672	-4.18451	-9.85209	-9.85209	-9.85209	-3.89862	-9.85209	-4.57535	C21orf58	chromosome 21 open reading frame 58 [Source:HGNC Symbol;Acc:HGNC:1300]
ENSGALG00000000547	-7.76032	-0.525207	12.0354	0.000521994	0.0199638	-3.93664	-1.50202	-3.83168	-4.80794	-2.81993	-3.34705	-9.38658	-9.38658	-9.38658	-9.38658	-1.24787	-9.38658	CNKSR1	connector enhancer of kinase suppressor of Ras 1 [Source:HGNC Symbol;Acc:HGNC:19700]
ENSGALG00000005272	-7.78974	4.72486	119.444	8.37089e-28	1.03088e-23	-1.91104	-0.154433	-0.967552	0.214509	-0.0411103	0.664046	-7.2565	-11.6248	-9.50244	-0.279186	1.2565	1.14974	CDH5	Cadherin-5 [Source:UniProtKB/Swiss-Prot;Acc:Q8AYD0]
ENSGALG00000008757	-7.79157	0.581705	15.0976	0.000102092	0.0061934	-2.75534	-9.31282	-1.41722	0.391735	-1.50349	-1.52984	-9.31282	-9.31282	-9.31282	-2.19185	-2.21927	-9.31282	CNRIP1	CB1 cannabinoid receptor-interacting protein 1 [Source:RefSeq peptide;Acc:NP_001264459]
ENSGALG00000008560	-7.80282	0.867868	18.1673	2.02319e-05	0.00185937	-1.11425	-3.03715	-3.56195	-1.94534	-7.47526	-3.41725	-8.48562	-10.7874	-10.7874	-3.36353	-2.64867	-10.7874	MLC1	megalencephalic leukoencephalopathy with subcortical cysts 1 [Source:HGNC Symbol;Acc:HGNC:17082]
ENSGALG00000004173	-7.83368	-0.807534	13.1544	0.000286846	0.0126668	-4.12148	-3.67947	-5.19604	-4.1933	-7.1969	-4.89986	-11.0447	-11.0447	-11.0447	-11.0447	-4.29622	-11.0447	AXDND1	axonemal dynein light chain domain containing 1 [Source:HGNC Symbol;Acc:HGNC:26564]
ENSGALG00000026853	-7.86435	2.86065	45.7363	1.35289e-11	2.38012e-08	0.224136	-0.252725	1.0983	0.566641	-0.0499905	0.313356	-7.86276	-6.12365	-10.1645	-2.35361	-3.416	-10.1645	FGF3	Fibroblast growth factor 3 [Source:UniProtKB/Swiss-Prot;Acc:P48801]
ENSGALG00000016140	-7.91404	-0.574673	18.006	2.20205e-05	0.00195095	-1.92805	-3.87557	-3.1338	-2.04466	-3.90261	-3.09319	-9.67327	-9.67327	-9.67327	-3.81768	-4.92782	-9.67327	FAM3B	family with sequence similarity 3, member B [Source:HGNC Symbol;Acc:HGNC:1253]
ENSGALG00000008709	-7.94008	-0.45984	11.541	0.000680767	0.0236812	-5.22008	-3.06793	-3.62616	-8.19002	-6.43242	-4.24864	-10.67	-10.67	-10.67	-2.10395	-10.67	-10.67	MCOLN3	mucolipin 3 [Source:HGNC Symbol;Acc:HGNC:13358]
ENSGALG00000004365	-7.94507	0.138417	25.4364	4.57221e-07	0.000102376	-4.32737	-3.10965	-3.39286	-2.9501	-3.54909	-3.75189	-10.4749	-10.4749	-10.4749	-2.19922	-4.01293	-2.97994	WDR66	WD repeat domain 66 [Source:HGNC Symbol;Acc:HGNC:28506]
ENSGALG00000009395	-7.95034	-0.0110731	18.7138	1.51876e-05	0.00152061	-5.39808	-4.10963	-5.59639	-3.44226	-3.713	-4.74887	-11.8314	-11.8314	-11.8314	-11.8314	-7.73213	-5.11914	GLRB	glycine receptor, beta [Source:HGNC Symbol;Acc:HGNC:4329]
ENSGALG00000013603	-7.97483	0.305734	27.4014	1.6531e-07	4.73439e-05	0.647527	1.65609	0.894631	1.05832	0.908165	1.52091	-5.84922	-5.84922	-5.84922	1.22899	2.50405	2.32555	MYCT1	myc target 1 [Source:HGNC Symbol;Acc:HGNC:23172]
ENSGALG00000009041	-7.99688	0.0881449	17.4584	2.93671e-05	0.00244362	-1.25391	-2.78412	-3.43695	-2.1806	-1.8563	-3.67547	-9.1942	-9.1942	-9.1942	-1.12133	-1.03906	-9.1942		Uncharacterized protein [Source:UniProtKB/TrEMBL;Acc:F1NGZ1]
ENSGALG00000013969	-8.00263	-1.10832	18.1126	2.08214e-05	0.00188541	-3.22557	-3.97022	-2.56297	-4.34281	-5.60467	-5.19941	-10.1488	-10.1488	-10.1488	-6.95834	-10.1488	-10.1488	ALDH8A1	aldehyde dehydrogenase 8 family, member A1 [Source:HGNC Symbol;Acc:HGNC:15471]
ENSGALG00000008702	-8.01755	-0.255262	24.4213	7.74085e-07	0.000148951	-1.80962	-2.31097	-2.50622	-3.07885	-2.93626	-2.06698	-9.20163	-9.20163	-9.20163	-2.41055	-3.48332	-1.70665	OVOL2	ovo-like zinc finger 2 [Source:HGNC Symbol;Acc:HGNC:15804]
ENSGALG00000005473	-8.04067	-0.0306601	16.9038	3.93224e-05	0.00300165	-2.60507	-1.92353	0.679588	0.208251	-0.630034	0.0736778	-7.60791	-7.60791	-7.60791	-7.60791	-1.80375	0.0307008	PNAT3	Arylamine N-acetyltransferase, pineal gland isozyme NAT-3 [Source:UniProtKB/Swiss-Prot;Acc:P13914]
ENSGALG00000018878	-8.20168	-0.207608	13.9569	0.000187052	0.00950396	-2.8621	-1.65915	-3.5973	-7.20995	-9.68996	-3.26858	-9.68996	-9.68996	-9.68996	-1.28754	-2.43525	-9.68996		Uncharacterized protein [Source:UniProtKB/TrEMBL;Acc:H9KZL5]
ENSGALG00000005932	-8.20551	0.78988	18.5027	1.69666e-05	0.00168503	-4.21769	-6.79087	-6.73987	-3.66264	-4.19642	-5.73548	-12.5886	-12.5886	-12.5886	-3.33428	-5.10847	-12.5886	MYT1	myelin transcription factor 1 [Source:HGNC Symbol;Acc:HGNC:7622]
ENSGALG00000008351	-8.22749	-0.5843	18.1818	2.0079e-05	0.00185919	-0.665688	-1.49956	-2.11059	-2.15352	-2.11202	-3.18315	-8.53588	-8.53588	-8.53588	-3.86984	-8.53588	-1.82359	CAV3	caveolin-3 [Source:RefSeq peptide;Acc:NP_989701]
ENSGALG00000007868	-8.29898	1.3485	43.4139	4.43032e-11	6.37507e-08	-1.30199	-2.1742	-3.0295	-2.46463	-2.8133	-3.39004	-8.80446	-11.1062	-11.1062	-2.86887	-4.59235	-3.08028	BCO2	beta-carotene oxygenase 2 [Source:HGNC Symbol;Acc:HGNC:18503]
ENSGALG00000024379	-8.30339	2.67048	63.9367	1.28481e-15	5.27416e-12	-1.79169	-1.24292	-2.55061	-1.00851	-1.94025	-0.122146	-10.8704	-8.58801	-10.8704	-1.26803	-0.447417	-0.569553		Uncharacterized protein [Source:UniProtKB/TrEMBL;Acc:F1NUH5]
ENSGALG00000003842	-8.30475	-0.123637	14.639	0.000130196	0.00735485	-4.21087	-1.29993	-2.96541	-1.87427	-4.46197	-1.81399	-9.66082	-9.66082	-9.66082	-9.66082	-2.37593	-9.66082	GHRH	growth hormone releasing hormone precursor [Source:RefSeq peptide;Acc:NP_001035554]
ENSGALG00000006602	-8.32178	0.607237	19.38	1.07125e-05	0.00115205	-1.03452	-0.957562	-0.998507	-0.694223	-3.31102	-0.606646	-8.32283	-8.32283	-8.32283	1.13695	-0.304687	-8.32283	SYT8	synaptotagmin VIII [Source:HGNC Symbol;Acc:HGNC:19264]
ENSGALG00000007157	-8.33768	-0.184351	19.5825	9.63501e-06	0.00106897	0.146111	0.229902	-0.893812	-1.62727	-1.54918	-1.19023	-7.43328	-7.43328	-7.43328	-7.43328	0.0204945	0.239103	FAM46D	family with sequence similarity 46, member D [Source:HGNC Symbol;Acc:HGNC:28399]
ENSGALG00000003399	-8.36825	0.956236	21.4874	3.56156e-06	0.00048734	-6.89472	-0.464079	-3.01685	-2.8001	-0.560328	-2.60238	-9.18245	-9.18245	-9.18245	-1.2228	0.498628	-1.10518	SELE	selectin E [Source:HGNC Symbol;Acc:HGNC:10718]
ENSGALG00000028653	-8.41746	0.507861	24.8055	6.34171e-07	0.00012803	-2.59528	-3.21331	-1.88458	-2.67875	-2.95776	-2.80103	-9.88359	-9.88359	-9.88359	-3.67098	-4.07944	-0.329757	C6orf163	chromosome 6 open reading frame 163 [Source:HGNC Symbol;Acc:HGNC:21403]
ENSGALG00000003028	-8.49851	0.243433	20.784	5.14102e-06	0.000646038	-5.71879	-2.84994	-3.29742	-3.24798	-3.54552	-6.33883	-11.0345	-11.0345	-11.0345	-7.84404	-3.47822	-2.83638	ADAMTS13	ADAM metallopeptidase with thrombospondin type 1 motif, 13 [Source:HGNC Symbol;Acc:HGNC:1366]
ENSGALG00000016448	-8.56631	-0.277241	13.1862	0.000282022	0.0125383	1.24836	-3.34941	-3.8876	-0.79591	-1.9254	-1.88363	-7.80951	-7.80951	-7.80951	-0.420217	-7.80951	-7.80951	KCNF1	potassium channel, voltage gated modifier subfamily F, member 1 [Source:HGNC Symbol;Acc:HGNC:6246]
ENSGALG00000017046	-8.58037	3.21009	53.4882	2.60149e-13	5.33956e-10	-1.98623	-5.44171	-0.609908	-1.07098	-1.55207	-1.3539	-11.8518	-8.72583	-11.8518	-1.86149	-2.21098	-0.741745	OSF-2	periostin precursor [Source:RefSeq peptide;Acc:NP_001025712]
ENSGALG00000004781	-8.58207	1.0395	34.6636	3.91895e-09	1.85623e-06	-3.71353	-3.57464	-4.60449	-2.77834	-3.3662	-3.76844	-11.4846	-11.4846	-11.4846	-3.72692	-3.679	-2.03408	ZBTB40	zinc finger and BTB domain containing 40 [Source:HGNC Symbol;Acc:HGNC:29045]
ENSGALG00000012327	-8.6943	0.548671	33.655	6.58059e-09	2.79448e-06	-3.70487	-2.34584	-2.35782	-2.44777	-3.07915	-3.19174	-10.3767	-10.3767	-10.3767	-2.08216	-2.72463	-3.31939	INHBA	inhibin beta A chain precursor [Source:RefSeq peptide;Acc:NP_990727]
ENSGALG00000011527	-8.73815	0.851499	24.8101	6.32652e-07	0.00012803	-2.97992	-2.72497	-3.61051	-1.01978	-3.34872	-2.39271	-10.8014	-10.8014	-10.8014	-4.75629	-3.24511	-10.8014	ENTPD3	ectonucleoside triphosphate diphosphohydrolase 3 [Source:HGNC Symbol;Acc:HGNC:3365]
ENSGALG00000004921	-8.77273	0.436752	22.7195	1.87452e-06	0.000292212	-4.44685	-4.07771	-8.65715	-3.48656	-6.80839	-7.06032	-12.5791	-12.5791	-12.5791	-5.5449	-5.55536	-5.57386	SLC6A1	solute carrier family 6 (neurotransmitter transporter), member 1 [Source:HGNC Symbol;Acc:HGNC:11042]
ENSGALG00000016076	-8.8613	2.7517	57.2778	3.78396e-14	9.31989e-11	-3.73315	-3.30974	-3.7636	-3.02398	-2.79756	-3.42904	-11.452	-11.452	-11.452	-0.278551	-1.55043	0.407612	DPYS	dihydropyrimidinase isoform 2 [Source:RefSeq peptide;Acc:NP_001264356]
ENSGALG00000015568	-9.02334	1.90165	36.0163	1.9567e-09	1.09531e-06	-4.32252	-2.52345	-4.92926	-3.18537	-3.70887	-3.29869	-11.5745	-11.5745	-11.5745	-0.789066	-1.38282	-4.41847	SH3TC1	SH3 domain and tetratricopeptide repeats 1 [Source:HGNC Symbol;Acc:HGNC:26009]
ENSGALG00000009791	-9.13993	1.39268	36.3652	1.63596e-09	1.06036e-06	-5.29183	-2.98948	-4.23334	-2.74335	-4.6021	-4.1707	-12.0175	-12.0175	-12.0175	-2.25805	-4.38885	-3.3156	PROX1	prospero homeobox protein 1 [Source:RefSeq peptide;Acc:NP_001005616]
ENSGALG00000003895	-9.20355	-0.080601	25.0315	5.64003e-07	0.000119753	-3.39121	0.0768208	-2.40705	-2.7691	-3.28408	-2.64835	-9.37137	-9.37137	-9.37137	-9.37137	-9.37137	-9.37137	PRDM12	PR domain containing 12 [Source:HGNC Symbol;Acc:HGNC:13997]
ENSGALG00000009853	-9.26809	0.430798	29.0632	7.00546e-08	2.27032e-05	0.0914174	1.93492	1.08646	1.56221	0.331271	0.324215	-7.04591	-7.04591	-7.04591	-7.04591	-2.13653	-4.5297	FOXG1	forkhead box protein G1 [Source:RefSeq peptide;Acc:NP_990524]
ENSGALG00000008908	-9.38237	1.03092	34.281	4.7702e-09	2.17574e-06	-0.12683	2.52781	0.491754	2.71785	1.85142	1.49571	-6.95469	-6.95469	-6.95469	-6.95469	-6.95469	-6.95469	NEUROD1	neurogenic differentiation factor 1 [Source:RefSeq peptide;Acc:NP_990251]
ENSGALG00000010500	-9.40116	0.956412	18.1993	1.98954e-05	0.00185615	0.944935	-0.507627	0.861633	1.31612	-1.13908	-0.465521	-7.83565	-7.83565	-7.83565	1.35984	-7.83565	-7.83565	Nkx-6.2	homeobox protein Nkx-6.2 [Source:RefSeq peptide;Acc:NP_001186477]
ENSGALG00000016215	-9.60132	2.53997	58.6106	1.92174e-14	5.91657e-11	-2.34642	-1.86337	-2.0184	-0.727647	-1.43809	-0.458666	-10.6656	-10.6656	-10.6656	-2.37112	0.222997	-0.285952	CXorf36	chromosome X open reading frame 36 [Source:HGNC Symbol;Acc:HGNC:25866]
ENSGALG00000015347	-9.65011	1.27861	20.7577	5.21209e-06	0.000648353	-4.82843	-11.7048	-1.61792	-2.64905	-5.5257	-1.36986	-11.7048	-11.7048	-11.7048	-11.7048	-11.7048	-11.7048	ZPLD1	zona pellucida-like domain containing 1 [Source:HGNC Symbol;Acc:HGNC:27022]
ENSGALG00000016153	-9.68839	0.428394	29.7502	4.91443e-08	1.68115e-05	-0.474602	0.302295	-0.252239	-1.30531	-2.9097	-2.45883	-8.7938	-8.7938	-8.7938	-8.7938	-4.44557	-2.44944	PSCA	prostate stem cell antigen [Source:HGNC Symbol;Acc:HGNC:9500]

## Sheet: Front_13_v_Front_15_bulk
geneId	logFC	logCPM	LR	PValue	FDR	Stream_13_2	Stream_13_3	Stream_13_4	Stream_15_1	Stream_15_2	Stream_15_3	Trailblazer_13_2	Trailblazer_13_3	Trailblazer_13_4	Trailblazer_15_1	Trailblazer_15_2	Trailblazer_15_3	Name	Description
ENSGALG00000015826	8.96955	0.0956757	12.2312	0.000469962	0.0216623	-0.296883	-3.67936	-4.7302	1.62612	-2.36849	-1.24506	2.64145	-6.91265	-6.91265	-6.91265	-6.91265	-6.91265	HTR1E	5-hydroxytryptamine (serotonin) receptor 1E, G protein-coupled [Source:HGNC Symbol;Acc:HGNC:5291]
ENSGALG00000011040	8.59892	-0.0165799	22.5999	1.99499e-06	0.000400845	-4.45793	-5.26211	-6.05066	-10.1101	-7.79329	-10.0093	-5.1154	-7.77997	-4.03307	-12.5901	-12.5901	-12.5901	SCN3A	sodium channel, voltage gated, type III alpha subunit [Source:HGNC Symbol;Acc:HGNC:10590]
ENSGALG00000007727	8.50753	-0.374643	14.0629	0.000176798	0.0107255	-3.80611	-6.38477	-5.83853	-9.01814	-11.4981	-5.69565	-3.73539	-3.13393	-11.4981	-11.4981	-11.4981	-11.4981		Uncharacterized protein [Source:UniProtKB/TrEMBL;Acc:F1NS00]
ENSGALG00000001410	8.02835	-0.557547	12.1774	0.000483725	0.0219818	-6.66432	-5.8401	-4.6737	-5.14427	-4.34121	-5.74831	-11.267	-2.6547	-11.267	-11.267	-11.267	-11.267	SPNS3	spinster homolog 3 (Drosophila) [Source:HGNC Symbol;Acc:HGNC:28433]
ENSGALG00000012464	7.74081	-0.603429	19.1455	1.21124e-05	0.00144819	-4.47838	-3.32561	-3.79963	-4.13953	-4.79984	-3.82927	-3.17808	-6.12337	-2.68236	-10.1642	-10.1642	-10.1642	SOUL	SOUL protein [Source:RefSeq peptide;Acc:NP_990120]
ENSGALG00000003603	7.721	-0.56641	16.5459	4.74856e-05	0.00427892	-2.16995	-3.34094	-3.28994	-1.97928	-3.25453	-4.44295	-1.48429	-6.85622	-2.33539	-9.13864	-9.13864	-9.13864		Uncharacterized protein [Source:UniProtKB/TrEMBL;Acc:F1NJ68]
ENSGALG00000019896	7.18983	-1.06922	13.008	0.000310164	0.0162585	-4.88836	-2.66865	-5.48029	-3.40405	-4.69316	-6.25002	-4.68506	-6.57901	-2.22308	-9.70497	-9.70497	-9.70497		Uncharacterized protein [Source:UniProtKB/TrEMBL;Acc:F1NWL1]
ENSGALG00000007772	6.99228	1.69323	15.7952	7.05815e-05	0.00565483	-0.406754	1.65402	-0.382439	0.21413	-0.0341283	0.324217	-6.63588	-8.93764	-1.4026	-8.93764	-8.93764	-8.93764	CBLN4	cerebellin-4 precursor [Source:RefSeq peptide;Acc:NP_001072955]
ENSGALG00000000548	6.86242	-0.0622151	16.4124	5.09496e-05	0.00448174	-4.14206	-3.00759	-5.20292	-5.52393	-4.76855	-4.33644	-3.1319	-2.10335	-8.63549	-10.7578	-8.67785	-10.7578	MATN1	cartilage matrix protein precursor [Source:RefSeq peptide;Acc:NP_001025546]
ENSGALG00000008267	6.67744	-0.201343	17.8501	2.3901e-05	0.00247345	-3.96779	-4.49116	-3.57891	-3.85132	-5.7867	-7.12861	-4.13279	-1.90167	-4.2349	-10.5836	-10.5836	-8.06733	IL5RA	interleukin-5 receptor subunit alpha [Source:RefSeq peptide;Acc:NP_001243081]
ENSGALG00000012190	6.56035	0.200909	12.8456	0.000338282	0.0170038	-5.87301	-7.52641	-5.7957	-4.27485	-5.5988	-4.78895	-9.41066	-13.0878	-6.08273	-13.0878	-13.0878	-13.0878	TMEM163	transmembrane protein 163 [Source:HGNC Symbol;Acc:HGNC:25380]
ENSGALG00000016608	6.22278	-0.75661	13.0201	0.00030816	0.0162585	-5.80328	-3.46513	-5.36803	-5.17211	-6.16839	-5.24087	-2.99647	-8.12357	-2.67603	-10.406	-8.32602	-10.406	ADCY3	adenylate cyclase 3 [Source:HGNC Symbol;Acc:HGNC:234]
ENSGALG00000007107	6.15422	-0.346926	11.8706	0.00057026	0.0243817	-3.23669	-5.37974	-3.29916	-3.85137	-3.88667	-4.83851	-2.68887	-0.569638	-9.5342	-9.5342	-6.6358	-9.5342		Uncharacterized protein [Source:UniProtKB/TrEMBL;Acc:E1C5X3]
ENSGALG00000014252	6.1401	0.563798	12.6156	0.000382532	0.018694	-5.18501	-6.49514	-6.02847	-6.45915	-7.30934	-5.44025	-2.47377	-12.6737	-8.82415	-10.3333	-9.77535	-10.1575
ENSGALG00000010342	5.8907	2.1406	10.9435	0.000939308	0.0347375	-3.24267	-3.26403	-4.53354	-4.52969	-5.4016	-5.38954	-2.16516	-13.2673	-13.2673	-9.54548	-8.7068	-13.2673	OTOGL	otogelin-like [Source:HGNC Symbol;Acc:HGNC:26901]
ENSGALG00000001745	5.69716	0.00589754	10.9309	0.000945753	0.0348711	-5.44119	-3.63107	-3.56602	-5.35738	-6.90909	-5.40419	-2.60716	-1.84928	-10.7569	-10.7569	-10.7569	-6.8345	PSTPIP2	proline-serine-threonine phosphatase interacting protein 2 [Source:HGNC Symbol;Acc:HGNC:9581]
ENSGALG00000022976	5.60505	-0.302939	14.656	0.000129025	0.00863558	-6.68783	-6.48401	-6.09289	-6.55168	-5.59853	-6.43153	-4.95048	-8.53553	-4.61527	-9.38592	-12.5764	-12.5764	OFCC1	orofacial cleft 1 candidate 1 [Source:HGNC Symbol;Acc:HGNC:21017]
ENSGALG00000024487	5.60002	1.23751	13.0075	0.000310252	0.0162585	1.13694	-1.56091	0.438271	-1.06626	-0.235485	-2.06458	-8.39955	1.0528	0.144609	-8.39955	-4.05132	-8.39955	C8orf22	chromosome 8 open reading frame 22 [Source:HGNC Symbol;Acc:HGNC:31745]
ENSGALG00000016802	5.53725	0.608996	14.2615	0.000159085	0.00997205	-3.97768	-5.47084	-4.57785	-6.47391	-5.18126	-5.80717	-3.79852	-4.49125	-10.4744	-12.5967	-8.79843	-12.5967		Uncharacterized protein [Source:UniProtKB/TrEMBL;Acc:F1P4Q2]
ENSGALG00000022810	5.44754	-0.920756	10.6287	0.00111348	0.0391786	-5.61139	-8.35826	-8.05329	-7.01291	-6.7947	-6.64213	-3.4619	-9.30913	-4.62464	-11.5915	-9.51157	-9.07533		Uncharacterized protein [Source:UniProtKB/TrEMBL;Acc:F1N9M5]
ENSGALG00000009920	5.16186	2.86218	11.4981	0.000696679	0.0278702	-3.10351	-6.36228	-4.58734	-3.66302	-7.51026	-3.9693	-2.95878	2.16098	-3.57512	-2.98559	-8.74241	-8.30616	Protein	Cochlin [Source:UniProtKB/Swiss-Prot;Acc:O42163]
ENSGALG00000008346	4.91247	0.0116146	11.6201	0.000652441	0.0267288	-3.34847	-2.70004	-4.02457	-2.71798	-3.08525	-3.36044	-0.885181	-7.4994	-2.85412	-6.59134	-6.36444	-9.78182	CASP18	caspase 18 [Source:RefSeq peptide;Acc:NP_001038154]
ENSGALG00000006662	4.70123	1.58007	18.3979	1.79254e-05	0.00195355	-0.939224	-1.02381	-2.11299	-1.18802	-1.2122	-0.675645	-2.87388	-5.72005	-3.31129	-10.3164	-6.89899	-10.3164	BPIFB3	Ovocalyxin-36 precursor [Source:RefSeq peptide;Acc:NP_001026032]
ENSGALG00000020679	4.67734	3.20054	10.4615	0.00121887	0.042164	0.15314	0.142076	-0.942132	-0.305388	-1.20186	0.762125	-0.556712	-4.88094	-10.8545	-10.8545	-5.22751	-10.8545	PLEKHS1	pleckstrin homology domain containing, family S member 1 [Source:HGNC Symbol;Acc:HGNC:26285]
ENSGALG00000006666	4.59863	1.91053	11.2798	0.000783565	0.0303447	0.621359	0.860533	-0.150085	0.984331	0.738706	1.3154	-1.11508	-5.67134	-8.79731	-8.79731	-5.89891	-8.79731	BPIFB7	protein TENP [Source:RefSeq peptide;Acc:NP_990357]
ENSGALG00000027026	4.2229	-0.0386691	11.4878	0.000700558	0.0279203	-2.72804	-4.13277	-3.64888	-4.26996	-4.7452	-4.14968	-2.95024	-3.43067	-2.45115	-10.3927	-5.64728	-10.3927		Uncharacterized protein [Source:UniProtKB/TrEMBL;Acc:R4GI33]
ENSGALG00000012845	3.90934	0.265154	11.9826	0.000536998	0.0236183	-5.70283	-5.98695	-5.87944	-4.99014	-5.89982	-5.53064	-4.0933	-5.66672	-6.19896	-8.99378	-7.97011	-12.7156	MYLK4	myosin light chain kinase family, member 4 [Source:HGNC Symbol;Acc:HGNC:27972]
ENSGALG00000027887	3.33958	3.56853	13.0465	0.000303844	0.0161984	-0.0617777	1.25807	0.399314	-2.15234	-0.276799	-1.05511	-0.609273	-0.711492	-1.90509	-10.9205	-2.86691	-6.29972		Uncharacterized protein [Source:UniProtKB/TrEMBL;Acc:R4GKL8]
ENSGALG00000011421	3.11621	1.62174	10.1012	0.00148174	0.0489211	-3.2614	-3.18977	-2.03857	-2.32494	-3.601	-1.90798	-3.20355	0.0152151	-0.680008	-2.96909	-4.00612	-6.43595	HAL	histidine ammonia-lyase [Source:RefSeq peptide;Acc:NP_989735]
ENSGALG00000016570	2.74491	2.78534	12.1862	0.000481446	0.0219593	-1.85284	-2.51175	-0.404206	-0.27326	-0.315623	-0.306116	0.642719	0.272558	-2.2167	-4.3364	-2.75852	-2.00182		Uncharacterized protein [Source:UniProtKB/TrEMBL;Acc:F1NHN3]
ENSGALG00000005692	2.54315	3.7243	12.0714	0.000512024	0.0229198	-1.50616	-2.91181	-1.8804	-2.6002	-2.03279	-1.73685	0.0698927	-1.20882	1.36498	-4.47137	-0.986754	-2.77817	CRISPLD2	cysteine-rich secretory protein LCCL domain containing 2 [Source:HGNC Symbol;Acc:HGNC:25248]
ENSGALG00000020554	2.42908	5.85217	37.3137	1.00575e-09	7.74113e-07	-2.02756	-2.94808	-2.3426	-2.24662	-2.15626	-2.01873	-2.74389	-3.23161	-4.82107	-5.71375	-5.80966	-5.86304	ADAMTSL1	ADAMTS-like 1 [Source:HGNC Symbol;Acc:HGNC:14632]
ENSGALG00000003406	2.22305	5.21881	22.9919	1.62684e-06	0.000345423	1.84673	2.55344	1.90219	-0.0205428	1.56574	0.745402	2.23269	1.66253	1.52522	-1.53497	0.408966	-0.676425	RXRG	retinoic acid receptor RXR-gamma [Source:RefSeq peptide;Acc:NP_990625]
ENSGALG00000007631	2.18186	3.57818	16.1904	5.72829e-05	0.0048482	-3.28555	-3.52011	-3.70822	-4.02877	-4.18449	-4.4992	-2.90287	-4.36477	-3.67381	-5.44933	-5.1727	-7.22595	MEGF11	multiple EGF-like-domains 11 [Source:HGNC Symbol;Acc:HGNC:29635]
ENSGALG00000022909	2.15993	4.41526	16.0959	6.02136e-05	0.00501034	-2.53516	-2.57645	-2.6493	-2.37182	-3.38684	-2.91538	-2.45045	-1.43617	-4.16366	-5.32956	-3.95171	-4.42475	PTPN3	protein tyrosine phosphatase, non-receptor type 3 [Source:HGNC Symbol;Acc:HGNC:9655]
ENSGALG00000012173	2.02778	3.79461	10.1269	0.00146123	0.0483739	3.06089	3.66906	2.93933	2.62524	2.01683	2.67797	3.66623	3.84779	0.260238	1.73006	1.11795	0.53613	LGALS3	lectin, galactoside-binding, soluble, 3 [Source:HGNC Symbol;Acc:HGNC:6563]
ENSGALG00000016866	-2.01031	3.4319	13.3468	0.000258864	0.0143599	-3.24163	-4.2398	-3.64532	-4.4493	-4.12098	-4.16001	-5.87847	-5.02467	-4.0067	-2.59344	-3.68497	-2.32299	FGF14	fibroblast growth factor 14 [Source:HGNC Symbol;Acc:HGNC:3671]
ENSGALG00000002845	-2.06106	4.75914	12.5972	0.000386317	0.0188043	-5.32771	-5.37643	-4.64628	-4.60143	-5.24095	-4.40608	-6.05428	-4.85275	-4.17227	-1.66673	-4.4142	-3.70181	CTNNA3	catenin alpha-3 [Source:RefSeq peptide;Acc:NP_001186465]
ENSGALG00000006851	-2.07944	5.43329	14.0997	0.000173367	0.0106217	-2.20298	-3.8414	-4.8297	-2.7345	-3.65482	-4.04137	-4.6138	-4.54774	-4.16233	-2.82342	-3.28704	-1.53247		Uncharacterized protein [Source:UniProtKB/TrEMBL;Acc:E1BVK1]
ENSGALG00000012662	-2.07948	4.91021	23.7053	1.12272e-06	0.00026589	-0.0534771	-0.50768	-0.848801	-0.451036	-0.74961	-0.993257	-1.50739	-1.98003	-2.70881	-1.06598	0.557448	0.324539	NUAK1	NUAK family, SNF1-like kinase, 1 [Source:HGNC Symbol;Acc:HGNC:14311]
ENSGALG00000012278	-2.09459	5.04995	16.6142	4.5807e-05	0.00417861	-0.198605	-0.465943	-1.17586	-0.148106	-1.05338	-0.739861	-0.618327	-2.73638	-2.66234	-0.453121	0.860737	0.630855	EMCN	endomucin [Source:HGNC Symbol;Acc:HGNC:16041]
ENSGALG00000006221	-2.13049	3.77559	19.8421	8.41106e-06	0.00115091	-0.435355	-0.275208	-1.56363	-1.44212	-1.43965	-1.91864	-2.71172	-3.5098	-2.07453	-0.469061	-0.666913	-0.432547	KIF1A	kinesin family member 1A [Source:HGNC Symbol;Acc:HGNC:888]
ENSGALG00000001496	-2.14908	3.35225	12.0715	0.000511979	0.0229198	-1.2425	-0.811819	-0.736635	-0.5327	-1.07114	-1.06178	-2.15312	-5.32384	-1.99326	-0.653471	-0.372179	-0.298365		Uncharacterized protein [Source:UniProtKB/TrEMBL;Acc:E1BU26]
ENSGALG00000016216	-2.19696	4.63654	15.085	0.000102776	0.0072738	0.126909	0.3933	-1.22554	-0.646838	-1.44752	-1.88233	-1.49279	-2.92077	-3.25731	-0.316512	-1.39732	0.613448	NDRG1	N-myc downstream regulated 1 [Source:HGNC Symbol;Acc:HGNC:7679]
ENSGALG00000009155	-2.23822	4.38288	15.7451	7.24744e-05	0.00575821	-1.82914	-1.93797	-1.84755	-1.61099	-1.72841	-1.35679	-5.72804	-2.15269	-3.38767	-1.13901	-1.21205	-0.484867	CHGB	chromogranin B [Source:HGNC Symbol;Acc:HGNC:1930]
ENSGALG00000016834	-2.25312	4.02204	22.3615	2.25853e-06	0.000434591	-2.914	-2.50377	-2.78822	-2.50985	-3.63476	-2.77571	-4.87351	-5.99129	-5.12279	-3.55335	-3.5133	-2.3104	MCF2L	guanine nucleotide exchange factor DBS [Source:RefSeq peptide;Acc:NP_001238992]
ENSGALG00000002326	-2.25514	2.44751	11.457	0.000712258	0.0281136	-3.75486	-5.11019	-4.46014	-4.69863	-4.21385	-3.85278	-4.55109	-5.16778	-4.06083	-1.53546	-2.71253	-3.00531		Uncharacterized protein [Source:UniProtKB/TrEMBL;Acc:E1BVN3]
ENSGALG00000028400	-2.25999	4.34094	25.9566	3.49177e-07	9.77298e-05	0.938383	0.06365	1.24491	2.63157	1.28112	2.00983	0.0155715	-0.359223	-0.827698	1.50054	2.11826	2.03169	GCHFR	GTP cyclohydrolase 1 feedback regulatory protein [Source:RefSeq peptide;Acc:NP_001186451]
ENSGALG00000025818	-2.28623	3.19329	11.5783	0.000667271	0.0270311	-1.59511	-1.89128	-1.64758	-1.07991	-2.36026	-1.62118	-2.61862	-5.61632	-4.58695	-1.19548	-2.33421	-1.12263	KCNK5	potassium channel, two pore domain subfamily K, member 5 [Source:HGNC Symbol;Acc:HGNC:6280]
ENSGALG00000002437	-2.30455	2.72779	12.242	0.000467249	0.0216623	0.633802	1.04382	0.830197	0.652795	0.397455	0.583357	-3.42165	-1.80346	-0.416523	0.955439	0.640811	1.06164	FAM69B	family with sequence similarity 69, member B [Source:HGNC Symbol;Acc:HGNC:28290]
ENSGALG00000026873	-2.36155	2.41218	12.3471	0.000441684	0.0210827	-2.58486	-2.90472	-2.87939	-3.39091	-3.24277	-3.48028	-5.68094	-6.22921	-4.09606	-2.19607	-3.12257	-2.87175	RSPO2	R-spondin 2 [Source:HGNC Symbol;Acc:HGNC:28583]
ENSGALG00000028582	-2.39956	4.27012	11.7223	0.000617564	0.0256071	-0.615592	-0.360518	0.460648	0.293863	0.690326	0.876347	-1.50295	-0.0704372	0.616117	-0.893085	3.36006	2.05799	LMO2	Gallus gallus LIM domain only 2 (rhombotin-like 1) (LMO2), mRNA. [Source:RefSeq mRNA;Acc:NM_204271]
ENSGALG00000012735	-2.40539	4.98843	17.1889	3.38416e-05	0.00328157	-1.47312	-0.308656	1.45805	0.904085	1.14132	1.9314	1.06217	1.73227	2.10052	3.20863	3.80627	4.81513	EDN1	endothelin 1 [Source:HGNC Symbol;Acc:HGNC:3176]
ENSGALG00000009415	-2.41971	4.62928	12.9713	0.000316305	0.0164891	-0.929152	-3.00597	-3.39537	-1.20084	-3.31296	-3.26271	-3.31203	-4.9147	-4.76427	-1.5115	-2.4939	-1.38057	SMOC1	SPARC related modular calcium binding 1 [Source:HGNC Symbol;Acc:HGNC:20318]
ENSGALG00000007929	-2.42038	3.90452	26.6136	2.48488e-07	7.46373e-05	-0.35455	-0.86613	-1.77533	-0.757397	-0.594674	-0.893074	-2.36213	-3.05698	-2.43094	-0.481503	-0.640558	0.39957	DIXDC1	DIX domain containing 1 [Source:HGNC Symbol;Acc:HGNC:23695]
ENSGALG00000013073	-2.42783	3.57278	13.9781	0.000184952	0.0110567	-0.911111	-0.594343	-0.282358	1.10494	0.10233	0.63385	-0.837756	-4.33438	-1.03023	0.512743	1.57529	0.58482	UPP1	uridine phosphorylase 1 [Source:HGNC Symbol;Acc:HGNC:12576]
ENSGALG00000011124	-2.42876	2.80424	12.2359	0.000468789	0.0216623	-2.81799	-2.589	-3.30274	-2.46527	-2.37405	-2.147	-4.05917	-5.71151	-2.40552	-1.45622	-0.588657	-1.27508	ARHGAP24	Rho GTPase activating protein 24 [Source:HGNC Symbol;Acc:HGNC:25361]
ENSGALG00000015862	-2.43316	5.63485	12.0085	0.000529589	0.02346	0.969211	1.52035	0.888427	2.30695	1.87487	1.87413	-1.50453	1.19694	-3.00139	3.19715	0.883516	1.97673	CA2	Carbonic anhydrase 2 [Source:UniProtKB/Swiss-Prot;Acc:P07630]
ENSGALG00000001840	-2.47087	3.20384	17.3613	3.09052e-05	0.00302061	-3.58562	-2.55527	-2.68983	-2.31101	-2.45079	-1.39689	-2.95829	-4.63628	-3.67505	-1.8907	-0.573941	-1.22983	TEK	TEK tyrosine kinase, endothelial [Source:HGNC Symbol;Acc:HGNC:11724]
ENSGALG00000023882	-2.51486	2.57649	12.8919	0.00033	0.0167932	0.983876	1.88573	1.34679	1.18449	0.258576	1.01719	-1.08529	0.0155182	-2.69575	2.10675	1.02825	1.56855	MALL	MAL-like protein [Source:RefSeq peptide;Acc:NP_001186357]
ENSGALG00000014516	-2.55468	1.37291	10.069	0.00150789	0.0493873	-3.54081	-4.36296	-5.34201	-3.9186	-4.53732	-4.26942	-7.01373	-5.68148	-5.77814	-3.59228	-3.76958	-3.18623	CPEB2	cytoplasmic polyadenylation element binding protein 2 [Source:HGNC Symbol;Acc:HGNC:21745]
ENSGALG00000014242	-2.69305	3.0717	25.3383	4.81068e-07	0.000131652	-1.55498	-1.93611	-1.91159	-1.48288	-1.66375	-1.52689	-3.17057	-4.10643	-3.81778	-0.512281	-1.59903	-0.949401	BEND4	BEN domain containing 4 [Source:HGNC Symbol;Acc:HGNC:23815]
ENSGALG00000006014	-2.71772	1.77003	10.3081	0.00132448	0.0446875	-4.3982	-5.10839	-5.58954	-4.32276	-4.7275	-4.97626	-7.10578	-7.91749	-4.87708	-4.09314	-2.92259	-3.2055	PRKCB	protein kinase C, beta [Source:HGNC Symbol;Acc:HGNC:9395]
ENSGALG00000021685	-2.76204	2.00099	15.0743	0.000103363	0.0072738	-0.193799	-0.644509	-0.59362	-0.270387	-0.740758	-0.550828	-3.27925	-2.19293	-2.95605	0.655967	-0.848117	-0.132762	SERINC2	serine incorporator 2 precursor [Source:RefSeq peptide;Acc:NP_001026061]
ENSGALG00000007564	-2.84104	3.20513	29.432	5.79136e-08	2.30066e-05	-1.77574	-1.38129	-1.80537	-1.33724	-1.51469	-1.1356	-3.0708	-4.05773	-3.88977	-1.37483	-0.456058	-0.62892		Uncharacterized protein [Source:UniProtKB/TrEMBL;Acc:E1BZW6]
ENSGALG00000029012	-2.85592	1.84247	12.452	0.00041754	0.0201647	-4.41725	-4.57044	-4.97205	-4.46015	-5.64889	-4.49463	-6.09377	-8.23833	-7.46009	-3.33075	-5.00423	-4.66532		Uncharacterized protein [Source:UniProtKB/TrEMBL;Acc:R4GI08]
ENSGALG00000004376	-2.86432	2.5025	14.4461	0.000144231	0.00929947	-1.22444	-1.90603	-1.48929	0.521175	-0.380736	0.349574	-2.3533	-3.82881	-1.331	-0.911437	0.691531	1.42513	IRK1	inward rectifier potassium channel 2 [Source:RefSeq peptide;Acc:NP_990701]
ENSGALG00000009864	-2.89932	2.14099	11.3608	0.000750099	0.0292325	-1.48506	-1.28393	-1.83152	-1.15171	-1.63904	-1.0554	-7.61893	-3.8498	-4.67728	-3.77773	-1.9745	-0.955937	TRAF-5	TNF receptor-associated factor 5 [Source:RefSeq peptide;Acc:NP_989550]
ENSGALG00000006793	-2.94637	2.38645	15.3674	8.85044e-05	0.00673532	-4.96391	-4.35364	-5.56726	-4.55463	-4.78993	-4.5421	-6.99487	-8.91794	-7.71056	-3.89915	-6.28273	-4.93055	NTRK3	NT-3 growth factor receptor precursor [Source:RefSeq peptide;Acc:NP_990500]
ENSGALG00000015448	-2.96555	4.32499	30.984	2.60163e-08	1.20363e-05	-1.96205	-3.66225	-3.37088	-2.50531	-4.16218	-3.29907	-5.84898	-6.51937	-6.93021	-3.47056	-3.67762	-3.11208	TOX	thymocyte selection-associated high mobility group box protein TOX [Source:RefSeq peptide;Acc:NP_001026196]
ENSGALG00000016820	-2.96692	3.29417	13.0228	0.000307718	0.0162585	-2.02838	-1.82908	-1.96673	-2.04909	-2.29737	-1.88829	-4.67913	-9.73793	-2.8882	-1.01355	-1.64914	-0.844053	GAS6	growth arrest-specific 6 [Source:HGNC Symbol;Acc:HGNC:4168]
ENSGALG00000015167	-2.99701	1.33531	10.3157	0.00131906	0.044627	-3.9507	-4.20829	-4.55403	-5.36136	-4.97721	-4.87843	-8.53576	-8.37299	-13.3694	-5.87878	-5.5847	-7.2032	PRUNE2	prune homolog 2 (Drosophila) [Source:HGNC Symbol;Acc:HGNC:25209]
ENSGALG00000004191	-3.00327	0.580832	10.5711	0.00114867	0.0401871	-3.72393	-2.16687	-2.5077	-3.15684	-3.2428	-2.19769	-5.38707	-5.22431	-5.42201	-2.8668	-2.31456	-2.02253	RIC8A	Synembryn-A [Source:UniProtKB/Swiss-Prot;Acc:Q5ZL77]
ENSGALG00000006519	-3.00499	1.19087	10.8409	0.000992838	0.0359612	-1.26546	-3.26537	-2.05057	-2.14981	-1.71636	-0.876765	-3.42698	-5.2151	-4.8486	-0.763213	-1.2714	-2.17281	DD1	uncharacterized protein LOC415485 [Source:RefSeq peptide;Acc:NP_001007828]
ENSGALG00000002562	-3.00872	2.23428	12.7376	0.000358383	0.0175836	-3.65557	-3.09775	-3.40915	-3.60446	-2.2571	-2.17737	-2.33154	-5.50704	-3.35871	-1.88703	0.602237	-0.389188	ARAP3	ArfGAP with RhoGAP domain, ankyrin repeat and PH domain 3 [Source:HGNC Symbol;Acc:HGNC:24097]
ENSGALG00000013907	-3.03094	4.57686	10.2652	0.00135561	0.0453649	-3.04714	-2.58117	-1.73794	-1.52732	-1.84019	-1.21884	-11.6661	-0.940063	-1.58355	0.0262805	1.5225	1.63034	KDR	vascular endothelial growth factor receptor 2 precursor [Source:RefSeq peptide;Acc:NP_001004368]
ENSGALG00000003562	-3.13439	2.25221	10.8905	0.00096659	0.0351563	-1.49651	-0.831975	-1.65806	-1.46944	-1.48927	-1.89128	-6.99624	-5.79858	-1.74971	-0.188443	-0.0898001	0.0331776	NPTX2	neuronal pentraxin II [Source:HGNC Symbol;Acc:HGNC:7953]
ENSGALG00000011200	-3.14947	1.15812	10.7533	0.00104095	0.0371573	-5.40894	-3.53019	-4.55054	-3.06968	-3.30908	-3.18844	-8.62847	-7.7351	-5.25936	-3.11993	-3.81275	-3.19332	THBS2	Thrombospondin-2 [Source:UniProtKB/Swiss-Prot;Acc:P35440]
ENSGALG00000015110	-3.1575	2.69529	15.2901	9.21981e-05	0.00683988	-2.9921	-1.39912	-2.47199	-1.98012	-1.87789	-1.72013	-3.02501	-7.35556	-5.04779	-1.3113	-0.800982	-1.19617	FAM189A2	family with sequence similarity 189, member A2 [Source:HGNC Symbol;Acc:HGNC:24820]
ENSGALG00000015599	-3.22946	3.32148	19.089	1.2476e-05	0.00147732	-0.191964	2.68609	1.21064	2.0564	1.45723	2.55326	-1.69362	-0.0528768	-1.71582	1.60746	1.6266	3.10698	SOHO-1	sensory organ homeobox protein SOHo [Source:RefSeq peptide;Acc:NP_990717]
ENSGALG00000012286	-3.42278	0.845682	12.8025	0.000346165	0.0171206	-5.27617	-6.06548	-5.42867	-5.13825	-5.17414	-4.47481	-11.1653	-9.1219	-9.99952	-6.96848	-5.98696	-6.75477	AMPH	amphiphysin [Source:RefSeq peptide;Acc:NP_001004398]
ENSGALG00000008135	-3.46581	1.2791	13.3498	0.000258452	0.0143599	-7.3405	-6.45379	-7.84414	-6.91266	-7.31387	-7.15699	-9.81786	-9.62732	-7.50978	-4.15583	-5.92271	-6.14943	SATB2	DNA-binding protein SATB2 [Source:RefSeq peptide;Acc:NP_001186039]
ENSGALG00000026763	-3.48541	0.514182	11.2305	0.000804641	0.0309884	-3.2596	-3.63681	-4.8634	-2.3667	-3.48629	-3.52953	-4.09922	-7.05689	-6.33326	-1.60139	-1.77372	-2.08058		Uncharacterized protein [Source:UniProtKB/TrEMBL;Acc:R4GK13]
ENSGALG00000029169	-3.49321	3.13307	22.9376	1.67344e-06	0.000349296	-2.41165	0.844946	0.113279	0.162825	0.261243	-0.171798	-0.512889	-1.10862	-0.398873	1.49869	3.58401	2.76521	HHEX	hematopoietically-expressed homeobox protein HHEX [Source:RefSeq peptide;Acc:NP_990583]
ENSGALG00000008359	-3.49784	0.809417	10.6303	0.00111247	0.0391786	-2.01721	-2.31299	-3.30949	-0.983774	-0.246666	-0.0597754	-7.99737	-1.70645	-2.63113	-0.381927	1.20352	1.13905	CD93	complement component C1q receptor precursor [Source:RefSeq peptide;Acc:NP_001186380]
ENSGALG00000014069	-3.51495	0.891758	12.2255	0.000471417	0.0216623	-4.35474	-3.84723	-4.14281	-3.00154	-3.45019	-4.06506	-4.15488	-8.50567	-6.38728	-2.03372	-2.07165	-1.66382	TP53I11	tumor protein p53-inducible protein 11 [Source:RefSeq peptide;Acc:NP_001244298]
ENSGALG00000013606	-3.72663	1.92299	20.394	6.30284e-06	0.000935175	-0.949677	-0.789275	-1.70026	-0.429053	-1.3949	-0.61907	-4.45402	-7.87475	-5.19435	-1.43022	-1.44073	-1.91337	FGL1	Gallus gallus fibrinogen-like 1 (FGL1), mRNA. [Source:RefSeq mRNA;Acc:NM_001277819]
ENSGALG00000019144	-3.75183	2.46652	11.9249	0.000553878	0.0238497	-6.70031	-5.56207	-7.13193	-6.61467	-5.86817	-6.00593	-7.41666	-8.16275	-12.8617	-4.57612	-3.59585	-8.91594	GABRG3	gamma-aminobutyric acid (GABA) A receptor, gamma 3 [Source:HGNC Symbol;Acc:HGNC:4088]
ENSGALG00000002652	-3.77252	1.31713	11.4213	0.000726067	0.0285287	0.563953	0.595346	0.390287	0.53892	0.57318	0.278585	-0.879013	-7.56825	-5.44591	0.482678	1.19181	1.99462	FZD10	frizzled-10 precursor [Source:RefSeq peptide;Acc:NP_989429]
ENSGALG00000014695	-3.85842	1.62482	11.8478	0.000577294	0.0245151	-3.44208	-3.02279	-2.68193	-3.38593	-3.35331	-2.69226	-5.77744	-11.9424	-11.9424	-4.86414	-3.58909	-2.77008	CLCN1	chloride channel, voltage-sensitive 1 [Source:HGNC Symbol;Acc:HGNC:2019]
ENSGALG00000014657	-3.86183	5.3371	20.398	6.28955e-06	0.000935175	0.190998	-3.94222	-4.02691	-3.48007	-5.44777	-4.67277	-6.86748	-7.53358	-6.12262	-3.13153	-3.47489	-2.27056	ADGRV1	adhesion G protein-coupled receptor V1 [Source:HGNC Symbol;Acc:HGNC:17416]
ENSGALG00000010391	-3.88908	0.811532	11.9622	0.000542915	0.0236311	-4.31327	-5.70379	-4.79678	-3.85465	-3.24014	-3.04373	-12.1835	-7.8383	-10.0611	-5.62144	-6.99332	-4.35311	MMRN1	multimerin 1 [Source:HGNC Symbol;Acc:HGNC:7178]
ENSGALG00000026146	-3.89047	1.01498	14.5647	0.000135431	0.00887144	-2.48493	-1.44815	-2.12297	-0.898296	0.128703	-0.975093	-3.22405	-4.4029	-1.89912	-1.06895	1.31464	1.7066	CRLF1	cytokine receptor-like factor 1 [Source:HGNC Symbol;Acc:HGNC:2364]
ENSGALG00000009686	-3.90515	1.3851	16.2951	5.4205e-05	0.00466807	-5.84287	-5.99613	-5.73039	-4.84688	-7.1919	-6.07913	-8.85532	-7.47104	-9.83933	-4.86821	-3.68854	-5.71621	PPP1R9A	protein phosphatase 1, regulatory subunit 9A [Source:HGNC Symbol;Acc:HGNC:14946]
ENSGALG00000007702	-3.96576	-0.0703064	13.0716	0.00029981	0.016123	-4.72426	-3.93046	-4.31746	-3.95067	-3.38202	-3.7568	-8.10836	-7.28416	-5.79671	-3.09254	-2.30484	-3.20707	XYLT2	xylosyltransferase 2 [Source:RefSeq peptide;Acc:NP_001001785]
ENSGALG00000017091	-3.98267	2.96583	21.6832	3.21596e-06	0.000587313	-4.16449	-3.43319	-5.06717	-4.13378	-3.87393	-3.57647	-7.25368	-9.37772	-5.40036	-4.11708	-2.93904	-1.67135	FLT1	vascular endothelial growth factor receptor 1 precursor [Source:RefSeq peptide;Acc:NP_989583]
ENSGALG00000013875	-3.98728	1.49304	11.3833	0.000741064	0.0289721	-0.723619	-0.718894	-1.88289	-1.28746	-1.5491	-1.21921	-2.42424	-9.26957	-9.26957	0.190215	-0.498808	0.141509	FAM83H	family with sequence similarity 83, member H [Source:HGNC Symbol;Acc:HGNC:24797]
ENSGALG00000029064	-3.99658	2.55033	26.479	2.66417e-07	7.63006e-05	-4.31178	-3.99784	-5.09401	-4.86903	-4.89692	-4.38411	-10.1733	-8.65956	-12.4192	-5.62066	-5.4732	-6.41472		Uncharacterized protein [Source:UniProtKB/TrEMBL;Acc:R4GH97]
ENSGALG00000006775	-4.01933	1.37207	10.4897	0.00120042	0.0417604	-2.99633	-1.79337	-2.98806	-2.03764	-1.32132	-1.85756	-9.82418	-9.82418	-3.02094	0.308731	-0.921077	-1.9352	TGM2	protein-glutamine gamma-glutamyltransferase 2 [Source:RefSeq peptide;Acc:NP_990779]
ENSGALG00000026853	-4.02586	2.86065	15.1401	9.98223e-05	0.00714918	0.224136	-0.252725	1.0983	0.566641	-0.0499905	0.313356	-7.86276	-6.12365	-10.1645	-2.35361	-3.416	-10.1645	FGF3	Fibroblast growth factor 3 [Source:UniProtKB/Swiss-Prot;Acc:P48801]
ENSGALG00000000894	-4.03277	2.03514	11.5998	0.000659596	0.0268669	-2.70853	-2.33227	-2.64345	-1.82574	-1.65335	-1.59598	-11.5144	-8.38841	-5.83321	-1.97363	-3.60825	-8.99815	APCDD1	Protein APCDD1 [Source:UniProtKB/Swiss-Prot;Acc:Q5R2I8]
ENSGALG00000006973	-4.0556	2.76286	11.9829	0.0005369	0.0236183	-2.59982	-2.38417	-3.62762	-2.75881	-4.63127	-2.84877	-7.58259	-10.1598	-11.1634	-13.2857	-4.3161	-4.18609	BLNK	B-cell linker protein [Source:UniProtKB/Swiss-Prot;Acc:Q9YGC1]
ENSGALG00000005103	-4.07283	0.337957	14.036	0.000179348	0.010774	-3.94163	-2.8371	-3.61325	-3.51559	-3.8848	-2.49339	-7.16116	-8.02623	-5.34584	-3.02831	-2.38325	-1.87562	GDPD1	glycerophosphodiester phosphodiesterase domain containing 1 [Source:HGNC Symbol;Acc:HGNC:20883]
ENSGALG00000026855	-4.17176	-0.439415	11.3315	0.000762032	0.0296039	-1.05167	-1.86403	-1.1838	-0.135438	-0.471769	-0.758894	-4.40092	-5.26599	-7.54841	-1.18574	-0.936065	-1.82243		Uncharacterized protein [Source:UniProtKB/TrEMBL;Acc:R4GFC3]
ENSGALG00000014074	-4.20294	0.105122	10.9704	0.000925791	0.0345944	-5.59127	-4.48772	-4.31191	-5.79102	-6.45134	-4.68109	-8.66824	-11.8157	-7.20234	-2.98212	-5.35376	-5.64959	CPEB4	cytoplasmic polyadenylation element binding protein 4 [Source:HGNC Symbol;Acc:HGNC:21747]
ENSGALG00000026983	-4.21583	-0.24507	11.796	0.000593576	0.0249726	-4.87296	-2.86618	-3.31008	-2.80697	-3.38839	-2.82236	-5.10741	-9.47568	-6.52933	-1.80164	-1.69102	-2.97273	CHRD	chordin precursor [Source:RefSeq peptide;Acc:NP_990311]
ENSGALG00000008442	-4.2213	2.98087	23.1306	1.51361e-06	0.00032702	-4.76376	-6.25071	-6.7819	-4.77461	-5.51694	-5.4673	-7.29019	-10.7078	-9.68671	-4.1434	-6.00204	-3.651	TENM1	teneurin-1 [Source:RefSeq peptide;Acc:NP_990193]
ENSGALG00000016543	-4.22791	1.04652	13.3955	0.000252232	0.0141837	-3.10302	-4.20134	-5.15624	-3.83207	-5.40349	-4.92738	-9.85912	-12.1609	-6.47972	-4.3241	-4.16082	-2.97685	NHS	Nance-Horan syndrome (congenital cataracts and dental anomalies) [Source:HGNC Symbol;Acc:HGNC:7820]
ENSGALG00000010806	-4.24655	0.955985	15.8145	6.98667e-05	0.00565483	-5.74826	-5.76535	-5.08949	-3.74221	-5.97964	-3.85762	-9.94325	-8.59025	-6.56385	-4.40822	-3.64376	-2.83393	RIN3	Ras and Rab interactor 3 [Source:HGNC Symbol;Acc:HGNC:18751]
ENSGALG00000012317	-4.29244	1.47299	10.4046	0.001257	0.0431198	-3.79014	-4.93811	-4.91124	-3.49573	-4.13431	-4.4002	-9.29178	-7.97256	-12.9689	-12.9689	-5.34024	-3.59842	ADGB	androglobin [Source:HGNC Symbol;Acc:HGNC:21212]
ENSGALG00000012875	-4.32899	-0.142718	11.1323	0.000848377	0.0321469	-3.41215	-4.28781	-4.35381	-3.49543	-3.79148	-4.93576	-5.45489	-10.2885	-10.2885	-3.21028	-2.38238	-2.64989	WEE2	WEE1 homolog 2 (S. pombe) [Source:HGNC Symbol;Acc:HGNC:19684]
ENSGALG00000013006	-4.36156	1.02267	11.9707	0.000540441	0.0236311	-1.14793	-1.77397	-1.14696	-0.720367	-3.066	-1.58228	-9.63264	-4.47138	-9.63264	-0.530096	-3.22448	-2.92035	ROPN1L	rhophilin associated tail protein 1-like [Source:HGNC Symbol;Acc:HGNC:24060]
ENSGALG00000003849	-4.36256	0.52477	12.3023	0.000452396	0.0215063	-5.06376	-4.90792	-5.40407	-5.88766	-6.52586	-5.90758	-8.47288	-10.8101	-13.0925	-5.97153	-4.37606	-8.47168	TRPM1	transient receptor potential cation channel, subfamily M, member 1 [Source:HGNC Symbol;Acc:HGNC:7146]
ENSGALG00000000695	-4.41396	1.0273	14.7093	0.000125425	0.00844045	-1.69728	-1.44982	-2.81441	-2.98938	-4.4886	-3.62479	-5.64427	-10.4779	-6.32651	-1.21401	-2.18272	-4.88667	MFSD4	major facilitator superfamily domain containing 4 [Source:HGNC Symbol;Acc:HGNC:25433]
ENSGALG00000004103	-4.44182	-0.410186	10.9659	0.000928025	0.0345944	-2.1223	-3.17769	-4.27932	-3.75456	-4.12671	-4.17448	-7.06651	-10.214	-10.214	-4.57666	-3.86174	-4.14595	FAM81A	family with sequence similarity 81, member A [Source:HGNC Symbol;Acc:HGNC:28379]
ENSGALG00000012123	-4.44746	3.14823	10.7659	0.0010339	0.037013	0.737038	-1.16178	-2.45711	-0.503608	-2.25956	-4.2607	-3.09996	-10.914	-10.914	-0.446952	-1.55585	0.556742	Pax-6	Paired box protein Pax-6 [Source:UniProtKB/Swiss-Prot;Acc:P47237]
ENSGALG00000015526	-4.53851	0.291499	10.3568	0.00128997	0.0440054	-2.07997	-2.37117	-2.2643	-2.96895	-3.24342	-1.27039	-6.19934	-9.87649	-9.87649	-2.17401	-3.4145	-7.36027	MCMDC2	minichromosome maintenance domain containing 2 [Source:HGNC Symbol;Acc:HGNC:26368]
ENSGALG00000012555	-4.58805	0.606854	15.2396	9.46975e-05	0.00694166	-3.83996	-7.10417	-4.36738	-4.57962	-4.31037	-4.42105	-7.66257	-9.74842	-9.0845	-5.98572	-3.64937	-3.53987	CCDC148	coiled-coil domain containing 148 [Source:HGNC Symbol;Acc:HGNC:25191]
ENSGALG00000008953	-4.61787	2.569	32.199	1.39164e-08	7.45133e-06	-2.7924	-1.88449	-1.98208	-1.959	-2.22496	-2.22312	-11.6715	-6.22804	-5.32281	-1.75811	-2.03649	-1.29179	AASS	aminoadipate-semialdehyde synthase [Source:HGNC Symbol;Acc:HGNC:17366]
ENSGALG00000008055	-4.62017	-1.03605	11.4971	0.000697037	0.0278702	-5.09083	-5.94647	-5.36861	-6.5252	-7.95605	-6.95163	-10.4066	-6.75181	-8.28423	-3.37241	-3.65806	-3.02955	SYT13	synaptotagmin-13 [Source:RefSeq peptide;Acc:NP_001186572]
ENSGALG00000015847	-4.62511	0.787545	12.7712	0.00035199	0.017339	-0.165962	-3.19082	-1.93744	-0.863328	-3.33554	-2.94758	-9.6009	-9.6009	-5.2001	-1.52804	-2.76827	-2.18348	PRSS35	protease, serine, 35 [Source:HGNC Symbol;Acc:HGNC:21387]
ENSGALG00000016298	-4.6406	1.60336	11.1771	0.000828135	0.0315742	-4.82117	-5.63203	-4.43854	-5.48517	-6.71364	-6.50482	-7.47455	-11.357	-13.6395	-3.92116	-3.62101	-11.1233	ADCY8	adenylate cyclase 8 (brain) [Source:HGNC Symbol;Acc:HGNC:239]
ENSGALG00000005576	-4.68557	-0.176109	10.1692	0.00142807	0.0475317	-6.60247	-4.42052	-4.36907	-4.60292	-4.70817	-3.83506	-11.2052	-7.16432	-11.2052	-5.07389	-2.79606	-6.89171	ATP2C2	ATPase, Ca++ transporting, type 2C, member 2 [Source:HGNC Symbol;Acc:HGNC:29103]
ENSGALG00000007012	-4.70183	2.42319	24.4847	7.49014e-07	0.000185783	0.213799	-0.36745	-0.458479	-0.22131	-2.24497	-1.32978	-7.72353	-3.8074	-5.87392	0.53793	-1.97166	-0.565037	ARRDC4	arrestin domain containing 4 [Source:HGNC Symbol;Acc:HGNC:28087]
ENSGALG00000002048	-4.73297	0.522641	14.4708	0.000142346	0.00922625	-1.68269	-1.08955	-0.97556	0.0782336	-0.387418	-0.334066	-3.1466	-7.9802	-7.9802	-1.08693	1.02613	-1.02902	GPRIN2	GRIN2-like protein [Source:RefSeq peptide;Acc:NP_990175]
ENSGALG00000005011	-4.77041	0.632992	18.6311	1.58612e-05	0.00179202	-2.73681	-2.57075	-3.71514	-3.75838	-4.28316	-4.47987	-9.15049	-11.4523	-8.5059	-4.55898	-4.70374	-4.61558	SHC4	SHC (Src homology 2 domain containing) family, member 4 [Source:HGNC Symbol;Acc:HGNC:16743]
ENSGALG00000012812	-4.82893	-0.00817794	14.0441	0.000178574	0.010774	-3.89105	-3.45816	-3.24755	-4.64515	-4.16317	-5.507	-10.8597	-6.81887	-10.8597	-2.72297	-4.11122	-4.4339	SVOPL	SVOP-like [Source:HGNC Symbol;Acc:HGNC:27034]
ENSGALG00000008430	-4.88548	-0.655188	10.3417	0.00130056	0.0442443	-3.99568	-3.41065	-5.61892	-6.61106	-4.50316	-5.54301	-10.4924	-7.36647	-8.37009	-7.30195	-3.6598	-2.51972	MAPK8IP1	mitogen-activated protein kinase 8 interacting protein 1 [Source:HGNC Symbol;Acc:HGNC:6882]
ENSGALG00000007211	-4.88565	-0.676398	12.3923	0.000431113	0.0206582	-7.98046	-7.5675	-5.862	-5.23454	-6.38007	-6.10172	-9.72584	-8.90164	-12.0276	-6.39026	-4.49625	-4.82455	CDH22	cadherin 22, type 2 [Source:HGNC Symbol;Acc:HGNC:13251]
ENSGALG00000004792	-4.93927	-0.219587	10.0954	0.00148641	0.0489443	-4.70345	-6.84209	-7.48069	-5.8327	-5.86818	-6.0296	-7.89177	-9.67305	-11.9555	-8.76499	-5.60321	-2.85583	PLCB2	phospholipase C, beta 2 [Source:HGNC Symbol;Acc:HGNC:9055]
ENSGALG00000028075	-4.98117	0.584639	18.3989	1.79158e-05	0.00195355	-4.122	-6.15952	-5.761	-5.84769	-5.42922	-5.14832	-9.76053	-8.93633	-7.44888	-4.50792	-4.48145	-2.42057	VSTM2A	V-set and transmembrane domain containing 2A [Source:HGNC Symbol;Acc:HGNC:28499]
ENSGALG00000016774	-5.05503	-0.665965	11.7942	0.000594151	0.0249726	-6.9572	-7.7324	-8.92387	-5.47209	-7.64693	-8.85041	-10.544	-12.8458	-9.89943	-6.89231	-6.14124	-4.90044	NPAS2	neuronal PAS domain-containing protein 2 [Source:RefSeq peptide;Acc:NP_001025713]
ENSGALG00000006877	-5.09001	4.04963	16.439	5.02398e-05	0.0044511	-2.06506	-2.13158	-2.21827	-0.972084	-1.39901	-0.554604	-3.24824	-11.8118	-11.8118	-2.01884	1.22057	0.00698703	KLHL4	kelch-like family member 4 [Source:HGNC Symbol;Acc:HGNC:6355]
ENSGALG00000020873	-5.10136	0.492704	12.9025	0.000328148	0.0167682	-5.79799	-6.46138	-5.45288	-4.80082	-5.35222	-5.22337	-10.8882	-10.064	-13.19	-4.93334	-6.09643	-13.19		Uncharacterized protein [Source:UniProtKB/TrEMBL;Acc:E1BVY9]
ENSGALG00000001533	-5.10627	-0.233324	13.234	0.000274914	0.0149401	-4.89134	-3.5135	-3.45668	-3.61827	-3.86637	-3.89259	-10.6821	-7.55615	-10.6821	-6.57289	-3.42741	-3.52604	TSNAXIP1	translin-associated factor X interacting protein 1 [Source:HGNC Symbol;Acc:HGNC:18586]
ENSGALG00000012419	-5.11943	0.435825	12.925	0.000324217	0.016706	-0.277797	-0.236238	-0.309401	0.123922	-0.224321	0.148465	-3.92436	-7.60151	-5.47917	0.260703	0.807628	-7.60151		Uncharacterized protein [Source:UniProtKB/TrEMBL;Acc:F1NDY4]
ENSGALG00000013869	-5.12585	0.332301	12.4446	0.000419205	0.0201661	-2.80601	-3.12387	-4.31684	-4.72521	-3.38709	-4.13518	-11.1076	-8.82514	-8.16121	-3.49212	-3.24081	-11.1076	IL20RA	interleukin 20 receptor, alpha [Source:HGNC Symbol;Acc:HGNC:6003]
ENSGALG00000000957	-5.22302	1.10687	16.6784	4.42824e-05	0.00406968	-2.70314	0.242109	-1.79236	-1.21203	-0.978354	-1.09095	-8.27586	-8.27586	-2.79684	-0.439079	1.26221	1.27797	ESAM	endothelial cell adhesion molecule [Source:HGNC Symbol;Acc:HGNC:17474]
ENSGALG00000005688	-5.28091	-0.0300648	15.5256	8.13962e-05	0.0063098	-3.26273	-1.25044	-2.64378	-2.36388	-1.9454	-2.43359	-8.57847	-4.5376	-8.57847	-0.82076	-0.183099	-2.00231	DNASE1L3	deoxyribonuclease gamma precursor [Source:RefSeq peptide;Acc:NP_001029987]
ENSGALG00000015658	-5.30769	-0.632816	11.5223	0.000687646	0.0276744	-2.03515	-2.36948	-3.80396	-2.29502	-4.56201	-4.19373	-9.35886	-7.07644	-9.35886	-4.47856	-2.13497	-4.48481	GDAP1	ganglioside induced differentiation associated protein 1 [Source:HGNC Symbol;Acc:HGNC:15968]
ENSGALG00000009953	-5.31988	-0.508506	14.6148	0.000131873	0.0086846	-3.89498	-1.99448	-1.6212	-0.351038	-0.684045	-1.05297	-4.40839	-7.55588	-7.55588	-0.521728	-1.20362	-0.307332		Uncharacterized protein [Source:UniProtKB/TrEMBL;Acc:F1NGV7]
ENSGALG00000013568	-5.33862	0.444471	17.9295	2.29243e-05	0.00239248	-3.70365	-3.85188	-4.33061	-3.65862	-3.36043	-4.60013	-11.2535	-8.97103	-7.78592	-3.63801	-2.57062	-6.16406	NR4A3	nuclear receptor subfamily 4, group A, member 3 [Source:HGNC Symbol;Acc:HGNC:7982]
ENSGALG00000010980	-5.34876	0.603086	18.4524	1.74206e-05	0.00194215	-6.24644	-5.32281	-7.70764	-4.51933	-4.24271	-4.43737	-7.0987	-11.9323	-11.9323	-3.69496	-3.65206	-2.83266	STK31	serine/threonine kinase 31 [Source:HGNC Symbol;Acc:HGNC:11407]
ENSGALG00000014793	-5.36327	-0.430239	14.8313	0.000117571	0.00804382	-4.32965	-4.77562	-4.34126	-4.47758	-4.26152	-5.86639	-11.3851	-11.3851	-9.26279	-5.43166	-5.28104	-5.04076		Uncharacterized protein [Source:UniProtKB/TrEMBL;Acc:E1C8K8]
ENSGALG00000016934	-5.37929	-0.822307	11.4724	0.000706382	0.0279809	-2.71385	-4.81124	-3.61171	-2.11198	-3.00597	-3.34546	-6.96958	-9.27133	-9.27133	-4.857	-4.36195	-1.85391		Uncharacterized protein [Source:UniProtKB/TrEMBL;Acc:F1NY34]
ENSGALG00000003611	-5.38856	1.00913	19.661	9.24717e-06	0.00121148	-2.30381	-2.01216	-1.38735	-1.86492	-1.32548	-1.09088	-9.99585	-9.99585	-6.52831	-4.24525	-1.43103	-3.73784		Uncharacterized protein [Source:UniProtKB/TrEMBL;Acc:E1BXH8]
ENSGALG00000026200	-5.42769	1.85603	26.8915	2.15206e-07	6.62566e-05	-3.7544	-2.84363	-4.14595	-3.67583	-4.8605	-4.26961	-8.41211	-9.65442	-9.83403	-2.89776	-3.79228	-6.71233	FAM134B	family with sequence similarity 134, member B [Source:HGNC Symbol;Acc:HGNC:25964]
ENSGALG00000028459	-5.46057	-0.192439	10.1872	0.00141415	0.047196	-5.47493	-3.94917	-3.91521	-5.39849	-5.35262	-4.32927	-9.39764	-11.6994	-11.6994	-7.28507	-11.6994	-3.96174	FAM180A	FAM180A protein [Source:UniProtKB/TrEMBL;Acc:G1E6K3]
ENSGALG00000028936	-5.49243	-0.282324	14.9428	0.000110823	0.00771062	-4.15792	-3.33354	-4.6693	-2.81122	-3.80034	-4.18467	-7.0767	-10.2242	-10.2242	-3.86152	-2.10211	-4.63299		Aldehyde dehydrogenase [Source:UniProtKB/TrEMBL;Acc:R4GM83]
ENSGALG00000028576	-5.57109	0.235569	11.0863	0.00086967	0.0327523	-1.96633	-2.69134	-0.0195628	-1.57964	-1.09925	-0.463335	-6.39027	-8.69203	-8.69203	-8.69203	-3.78264	-0.891923	PAX1	paired box 1 [Source:HGNC Symbol;Acc:HGNC:8615]
ENSGALG00000004946	-5.59622	0.132061	14.735	0.000123726	0.00837187	-6.04944	-6.62884	-5.4958	-6.80172	-6.22421	-6.38625	-12.7212	-8.68036	-12.7212	-6.22264	-7.40885	-3.31015	COL4A4	collagen, type IV, alpha 4 [Source:HGNC Symbol;Acc:HGNC:2206]
ENSGALG00000026687	-5.62426	0.0145034	15.7017	7.41587e-05	0.00585426	-4.03598	-2.88321	-3.42057	-6.3773	-4.35744	-4.05427	-5.65814	-9.72185	-9.72185	-3.59055	-0.715519	-1.77651	PLCD4	phospholipase C, delta 4 [Source:HGNC Symbol;Acc:HGNC:9062]
ENSGALG00000023094	-5.68086	-0.180298	16.485	4.90368e-05	0.004376	0.253063	-1.46142	-1.53684	0.537592	-0.150939	-1.22206	-6.5748	-6.5748	-3.10726	1.60305	-0.222534	1.39791		Uncharacterized protein [Source:UniProtKB/TrEMBL;Acc:E1C5F7]
ENSGALG00000005956	-5.69153	0.50117	11.1806	0.000826563	0.0315742	-3.38694	-6.79734	-5.12154	-3.11229	-5.76667	-5.6141	-6.49981	-7.43756	-10.5635	-0.614141	-2.40838	-10.5635		Annexin [Source:UniProtKB/TrEMBL;Acc:E1C8K3]
ENSGALG00000012754	-5.69225	-0.513273	10.4419	0.0012319	0.0424955	-4.43762	-6.64749	-6.88887	-5.77352	-12.0744	-7.37874	-12.0744	-12.0744	-9.12808	-3.95866	-8.27618	-4.82588	PAH	phenylalanine-4-hydroxylase [Source:RefSeq peptide;Acc:NP_001001298]
ENSGALG00000007132	-5.78362	0.875927	20.2851	6.67193e-06	0.000978153	-6.47228	-2.19589	-4.42676	-3.31458	-1.40359	-2.19792	-10.5194	-7.39346	-7.57307	-2.51341	-2.38071	-2.06681	ACOX2	acyl-CoA oxidase 2, branched chain [Source:HGNC Symbol;Acc:HGNC:120]
ENSGALG00000016080	-5.79517	-0.606473	14.1859	0.000165604	0.0101971	-4.82906	-3.75363	-2.21625	-3.94669	-2.25475	-2.04593	-6.87882	-9.18058	-9.18058	-2.3895	-3.65101	-2.07306	ABRA	actin-binding Rho activating protein [Source:HGNC Symbol;Acc:HGNC:30655]
ENSGALG00000016507	-5.80141	-0.345893	12.2937	0.000454479	0.0215063	-3.4245	-1.84151	-3.65345	-2.40553	-2.38724	-2.52355	-9.31307	-7.03065	-9.31307	-2.52199	-1.80712	-9.31307	FNDC4	fibronectin type III domain containing 4 [Source:HGNC Symbol;Acc:HGNC:20239]
ENSGALG00000016221	-5.80643	-0.235076	13.3726	0.00025533	0.0142927	-7.33611	-6.65115	-7.20987	-5.05701	-6.47276	-5.41834	-12.6518	-10.3694	-10.5295	-10.3114	-6.84769	-3.88593	EFHC2	EF-hand domain-containing family member C2 [Source:RefSeq peptide;Acc:NP_001032918]
ENSGALG00000016140	-5.81938	-0.574673	10.478	0.00120802	0.0419065	-1.92805	-3.87557	-3.1338	-2.04466	-3.90261	-3.09319	-9.67327	-9.67327	-9.67327	-3.81768	-4.92782	-9.67327	FAM3B	family with sequence similarity 3, member B [Source:HGNC Symbol;Acc:HGNC:1253]
ENSGALG00000009514	-5.88794	3.81709	37.9399	7.29575e-10	6.41765e-07	-1.88793	-3.22481	-3.92675	-1.93637	-4.90416	-3.92774	-9.29187	-7.85179	-10.9651	-2.13977	-4.80883	-3.19182	NRCAM	neuronal cell adhesion molecule [Source:HGNC Symbol;Acc:HGNC:7994]
ENSGALG00000005975	-5.92462	-0.191363	10.3189	0.00131673	0.044627	-2.96538	-5.93264	-4.43403	-2.70502	-5.08866	-5.50659	-10.8593	-8.5769	-10.8593	-2.66137	-6.11387	-10.8593	ZNF488	zinc finger protein 488 [Source:HGNC Symbol;Acc:HGNC:23535]
ENSGALG00000028506	-5.92662	-1.01525	13.9078	0.000192005	0.011368	-3.49348	-2.81193	-4.95806	-2.94819	-3.48451	-2.82873	-6.19456	-8.49632	-8.49632	-1.14244	-1.43727	-3.87549	NHSL2	NHS-like 2 [Source:HGNC Symbol;Acc:HGNC:33737]
ENSGALG00000021570	-6.00633	-0.202758	16.1774	5.76791e-05	0.0048482	-0.422806	0.936224	-0.669302	0.393903	-1.10531	-1.92947	-7.09459	-7.09459	-4.97225	-0.152809	-1.90445	0.322834	ZBTB6	zinc finger and BTB domain-containing protein 6 [Source:RefSeq peptide;Acc:NP_001264570]
ENSGALG00000003432	-6.01549	-0.868002	10.9123	0.000955275	0.035117	-4.03218	-5.68704	-5.71132	-2.7706	-3.47338	-3.81913	-10.3992	-10.3992	-10.3992	-4.64861	-4.97415	-10.3992	AGXT2	alanine--glyoxylate aminotransferase 2 [Source:HGNC Symbol;Acc:HGNC:14412]
ENSGALG00000007487	-6.0514	-0.714328	10.8882	0.000967763	0.0351563	-4.06131	-2.5623	-3.06137	-2.43911	-3.58672	-4.18451	-9.85209	-9.85209	-9.85209	-3.89862	-9.85209	-4.57535	C21orf58	chromosome 21 open reading frame 58 [Source:HGNC Symbol;Acc:HGNC:1300]
ENSGALG00000016153	-6.05613	0.428394	12.8152	0.00034381	0.0171206	-0.474602	0.302295	-0.252239	-1.30531	-2.9097	-2.45883	-8.7938	-8.7938	-8.7938	-8.7938	-4.44557	-2.44944	PSCA	prostate stem cell antigen [Source:HGNC Symbol;Acc:HGNC:9500]
ENSGALG00000010933	-6.0714	0.718112	16.9272	3.88404e-05	0.00367938	-3.24931	-5.98872	-4.98193	-4.7702	-7.60195	-5.48484	-8.72166	-12.3988	-12.3988	-3.07882	-7.08643	-4.79478		Uncharacterized protein [Source:UniProtKB/TrEMBL;Acc:F1NSM0]
ENSGALG00000026902	-6.08125	0.0636991	19.2411	1.15207e-05	0.00140473	-0.712005	-2.8316	-1.98403	-0.700418	-1.99624	-1.05679	-6.32755	-8.6293	-8.6293	-1.83822	-1.92477	-1.47323	P2RX6	purinergic receptor P2X, ligand gated ion channel, 6 [Source:HGNC Symbol;Acc:HGNC:8538]
ENSGALG00000027720	-6.13452	0.498844	22.5778	2.01806e-06	0.000400845	-2.68448	-1.38416	-2.06849	-1.47335	-2.80359	-1.70424	-9.78146	-7.49904	-9.78146	-3.15868	-2.49658	-2.94479	OTX2	homeobox protein OTX2 [Source:RefSeq peptide;Acc:NP_989851]
ENSGALG00000013079	-6.19583	1.21414	30.9564	2.6389e-08	1.20363e-05	-5.94072	-7.60472	-5.84457	-5.64967	-6.62754	-5.66782	-9.92827	-9.95065	-13.6054	-3.82577	-4.28316	-5.55358	ABCA13	ATP-binding cassette, sub-family A (ABC1), member 13 [Source:HGNC Symbol;Acc:HGNC:14638]
ENSGALG00000004880	-6.25814	0.763859	17.4399	2.96534e-05	0.00296895	-2.47105	-4.28887	-4.65926	-4.2061	-3.54182	-3.89325	-11.5394	-8.41343	-11.5394	-9.19895	-3.15792	-3.06747	SYCP2	synaptonemal complex protein 2 [Source:HGNC Symbol;Acc:HGNC:11490]
ENSGALG00000008629	-6.2597	1.32343	35.8094	2.17594e-09	1.57627e-06	-4.24527	-5.24109	-5.14841	-5.37903	-5.30464	-4.62067	-7.86219	-9.10451	-12.2305	-2.68187	-2.34847	-3.35899		Uncharacterized protein [Source:UniProtKB/TrEMBL;Acc:F1NLS1]
ENSGALG00000010736	-6.28088	-0.191268	19.7869	8.65719e-06	0.00116542	-2.83172	-1.51789	-2.13335	-1.89683	-3.17209	-3.38861	-9.05619	-6.77377	-9.05619	-1.93522	-1.57609	-2.55324	DIO1	Gallus gallus deiodinase, iodothyronine, type I (DIO1), mRNA. [Source:RefSeq mRNA;Acc:NM_001097614]
ENSGALG00000016518	-6.28949	2.4285	58.1929	2.37637e-14	5.60182e-11	-2.74153	-2.82811	-3.55521	-3.05558	-3.16174	-3.47692	-7.90415	-11.9679	-6.85766	-1.64441	-1.59313	-1.47043	PHKA2	phosphorylase kinase, alpha 2 (liver) [Source:HGNC Symbol;Acc:HGNC:8926]
ENSGALG00000015528	-6.29848	0.350868	19.0191	1.29413e-05	0.00150703	-5.26496	-4.33894	-5.95051	-6.41391	-8.07651	-6.72848	-9.72586	-12.8734	-12.8734	-6.66074	-6.70311	-3.71294	JAKMIP1	janus kinase and microtubule interacting protein 1 [Source:HGNC Symbol;Acc:HGNC:26460]
ENSGALG00000009395	-6.32344	-0.0110731	12.493	0.000408475	0.0198046	-5.39808	-4.10963	-5.59639	-3.44226	-3.713	-4.74887	-11.8314	-11.8314	-11.8314	-11.8314	-7.73213	-5.11914	GLRB	glycine receptor, beta [Source:HGNC Symbol;Acc:HGNC:4329]
ENSGALG00000016721	-6.34682	-0.268191	11.6215	0.000651939	0.0267288	-5.14694	-3.94834	-3.81846	-3.73287	-6.39356	-4.43481	-10.9377	-10.9377	-8.81538	-2.31104	-6.83842	-10.9377	PLCXD1	PI-PLC X domain-containing protein 1 [Source:RefSeq peptide;Acc:NP_001122109]
ENSGALG00000025939	-6.40038	-0.613428	16.9702	3.79712e-05	0.00362493	-6.20562	-6.9434	-7.43089	-6.60885	-4.67769	-5.32059	-11.6556	-11.6556	-9.53323	-6.58876	-3.82927	-4.23814		Uncharacterized protein [Source:UniProtKB/TrEMBL;Acc:R4GGW5]
ENSGALG00000009562	-6.41576	1.05288	19.5174	9.96892e-06	0.00125273	-0.878012	-1.2241	-1.5836	-1.96441	-1.5868	-3.18471	-9.83803	-6.71207	-9.83803	-7.49759	-1.80204	-0.854682	PLEK2	pleckstrin-2 [Source:RefSeq peptide;Acc:NP_001264366]
ENSGALG00000008351	-6.41863	-0.5843	11.9525	0.000545755	0.0236654	-0.665688	-1.49956	-2.11059	-2.15352	-2.11202	-3.18315	-8.53588	-8.53588	-8.53588	-3.86984	-8.53588	-1.82359	CAV3	caveolin-3 [Source:RefSeq peptide;Acc:NP_989701]
ENSGALG00000008560	-6.42559	0.867868	13.5151	0.000236649	0.0134923	-1.11425	-3.03715	-3.56195	-1.94534	-7.47526	-3.41725	-8.48562	-10.7874	-10.7874	-3.36353	-2.64867	-10.7874	MLC1	megalencephalic leukoencephalopathy with subcortical cysts 1 [Source:HGNC Symbol;Acc:HGNC:17082]
ENSGALG00000010252	-6.47104	-0.201632	13.2954	0.00026606	0.0146274	-3.00897	-4.46639	-4.89916	-7.21423	-5.54697	-2.94898	-8.25702	-10.5588	-10.5588	-4.42748	-1.95753	-7.17451	KRT80	keratin 80, type II [Source:HGNC Symbol;Acc:HGNC:27056]
ENSGALG00000010868	-6.49526	1.96715	39.6541	3.03162e-10	2.87188e-07	-3.78065	-4.68305	-5.91699	-3.4625	-4.43624	-3.42197	-7.48339	-7.50651	-11.8517	-1.90229	-0.907633	-2.56593	MACC1	metastasis associated in colon cancer 1 [Source:HGNC Symbol;Acc:HGNC:30215]
ENSGALG00000023439	-6.54044	-0.67716	14.1927	0.000165012	0.0101971	-5.05157	-3.38851	-4.4262	-1.88607	-3.78088	-2.8958	-9.86818	-9.86818	-9.86818	-5.20213	-3.30423	-5.5547	DFNB59	deafness, autosomal recessive 59 [Source:HGNC Symbol;Acc:HGNC:29502]
ENSGALG00000013723	-6.55563	-0.712461	12.1901	0.000480428	0.0219593	-2.90044	-0.31547	-1.41576	-1.91103	-0.461085	-1.21414	-7.71704	-7.71704	-7.71704	-7.71704	-1.25506	-1.99106	OAS*A	59 kDa 2'-5'-oligoadenylate synthase-like protein [Source:RefSeq peptide;Acc:NP_990372]
ENSGALG00000015795	-6.61534	0.450958	21.3456	3.83508e-06	0.00063823	-5.903	-5.50451	-3.63791	-5.44827	-6.68614	-4.9159	-8.90305	-12.0505	-12.0505	-2.73977	-5.10027	-4.99329	ADAMTS5	ADAM metallopeptidase with thrombospondin type 1 motif, 5 [Source:HGNC Symbol;Acc:HGNC:221]
ENSGALG00000005404	-6.66154	-0.308072	19.3158	1.10783e-05	0.0013643	-4.6479	-8.69504	-5.15679	-0.793522	-2.1284	-2.27366	-8.69504	-6.41262	-8.69504	-0.858256	-1.63599	-1.27762	LRTM1	leucine-rich repeats and transmembrane domains 1 [Source:HGNC Symbol;Acc:HGNC:25023]
ENSGALG00000011706	-6.71275	-0.834818	10.947	0.000937535	0.0347375	-2.23587	-5.1954	-3.0269	-0.979469	-4.72397	-3.294	-8.96158	-8.96158	-8.96158	-2.1185	-8.96158	-3.51906	ACKR4	atypical chemokine receptor 4 [Source:HGNC Symbol;Acc:HGNC:1611]
ENSGALG00000000400	-6.71517	-0.607826	19.6184	9.45523e-06	0.0012257	-5.44031	-7.65697	-5.8523	-6.61853	-5.00615	-5.37153	-10.8903	-8.60784	-10.8903	-3.07935	-3.63555	-3.43353	KCNC4	potassium channel, voltage gated Shaw related subfamily C, member 4 [Source:HGNC Symbol;Acc:HGNC:6236]
ENSGALG00000003842	-6.71731	-0.123637	10.5954	0.00113372	0.039777	-4.21087	-1.29993	-2.96541	-1.87427	-4.46197	-1.81399	-9.66082	-9.66082	-9.66082	-9.66082	-2.37593	-9.66082	GHRH	growth hormone releasing hormone precursor [Source:RefSeq peptide;Acc:NP_001035554]
ENSGALG00000002643	-6.75604	-0.767036	12.8556	0.000336479	0.0169874	-3.3363	-2.76793	-3.52916	-4.65989	-2.96795	-4.2262	-9.89378	-9.89378	-9.89378	-9.89378	-4.58141	-2.9426	SELP	selectin P (granule membrane protein 140kDa, antigen CD62) [Source:HGNC Symbol;Acc:HGNC:10721]
ENSGALG00000011104	-6.80748	0.061727	15.5636	7.97771e-05	0.00625768	-3.69227	-10.9071	-4.02693	-3.12052	-4.91779	-3.72214	-8.6053	-10.9071	-10.9071	-5.52696	-3.59262	-2.28931	GCG	Glucagon Glicentin-related polypeptide Glucagon Glucagon-like peptide 1 Glucagon-like peptide 1(7-37) Glucagon-like peptide 1(7-36) Glucagon-like peptide 2 [Source:UniProtKB/Swiss-Prot;Acc:P68259]
ENSGALG00000012613	-6.81292	1.15862	37.7221	8.1574e-10	6.69723e-07	-3.58193	-2.39503	-2.44654	-1.94559	-2.25614	-2.00125	-10.2537	-7.97129	-7.30736	-1.49934	-2.16544	-0.812928	FBP1	fructose-1,6-bisphosphatase 1 [Source:RefSeq peptide;Acc:NP_001264977]
ENSGALG00000026345	-6.8279	0.112701	20.6591	5.48767e-06	0.000865492	-4.4853	-3.26026	-4.49854	-3.69032	-5.7832	-3.52753	-10.9821	-10.9821	-8.85972	-5.4676	-3.63865	-2.43538	GMIP	GEM interacting protein [Source:HGNC Symbol;Acc:HGNC:24852]
ENSGALG00000011358	-6.88281	-1.27246	11.4179	0.000727407	0.0285287	-3.69613	-2.97773	-5.8405	-4.93083	-6.45028	-4.24367	-9.7624	-9.7624	-9.7624	-2.55955	-4.85302	-9.7624	Wnt6	Gallus gallus wingless-type MMTV integration site family, member 6 (WNT6), mRNA. [Source:RefSeq mRNA;Acc:NM_001007594]
ENSGALG00000007868	-6.95674	1.3485	32.0566	1.49749e-08	7.68399e-06	-1.30199	-2.1742	-3.0295	-2.46463	-2.8133	-3.39004	-8.80446	-11.1062	-11.1062	-2.86887	-4.59235	-3.08028	BCO2	beta-carotene oxygenase 2 [Source:HGNC Symbol;Acc:HGNC:18503]
ENSGALG00000007388	-6.97248	-0.463832	13.7125	0.000213032	0.0123749	-5.07642	-5.35105	-5.2084	-3.6569	-4.5716	-4.47106	-11.4434	-11.4434	-11.4434	-4.01959	-7.34415	-11.4434		Uncharacterized protein [Source:UniProtKB/TrEMBL;Acc:E1C6U3]
ENSGALG00000023356	-7.01521	0.0344697	12.0654	0.000513671	0.0229198	-4.26702	-8.42195	-9.21221	-9.25275	-10.6836	-8.18471	-10.8324	-13.1341	-13.1341	-4.26244	-13.1341	-5.3649		Uncharacterized protein [Source:UniProtKB/TrEMBL;Acc:F1P4Z3]
ENSGALG00000014267	-7.098	-1.08458	10.2957	0.00133342	0.0448663	-7.12056	-2.41891	-2.48545	-3.86016	-9.40829	-5.02067	-9.40829	-9.40829	-9.40829	-9.40829	-3.52311	-2.20523	RBM47	RNA binding motif protein 47 [Source:HGNC Symbol;Acc:HGNC:30358]
ENSGALG00000006992	-7.11786	-1.25243	10.9623	0.000929821	0.0345944	-3.09914	-4.63053	-2.85032	-8.785	-2.43821	-3.61988	-8.785	-8.785	-8.785	-8.785	-2.22105	-1.94833	MMP9	matrix metalloproteinase-9 precursor [Source:RefSeq peptide;Acc:NP_989998]
ENSGALG00000012456	-7.1197	-0.167554	21.6416	3.28647e-06	0.000587313	-5.33778	-4.66183	-4.00581	-3.48105	-6.09266	-3.36042	-9.94049	-7.65807	-9.94049	-1.43767	-1.80178	-3.51466	RAC2	ras-related C3 botulinum toxin substrate 2 [Source:RefSeq peptide;Acc:NP_001188381]
ENSGALG00000009050	-7.17015	0.0374418	14.0905	0.000174225	0.0106217	-4.6508	-3.99456	-5.56533	-5.02167	-5.05722	-5.80386	-11.3226	-11.3226	-9.20025	-1.84624	-7.22329	-11.3226	CAPN3	calpain-3 [Source:RefSeq peptide;Acc:NP_001004405]
ENSGALG00000004128	-7.18625	-0.739308	15.3511	8.92704e-05	0.00673532	-0.712353	0.389984	-3.24038	0.0144337	-1.76682	0.193749	-6.77863	-6.77863	-6.77863	-2.66941	-0.16628	-0.0663415	CYSLTR1	cysteinyl leukotriene receptor 1 [Source:HGNC Symbol;Acc:HGNC:17451]
ENSGALG00000010293	-7.28249	-0.813593	11.7334	0.000613899	0.0256071	-4.16623	-10.2325	-4.38381	-2.70769	-3.73549	-4.87977	-10.2325	-10.2325	-10.2325	-3.11154	-10.2325	-3.65635	Rd	Riboflavin-binding protein Riboflavin-binding protein, plasma form Riboflavin-binding protein, yolk major form Riboflavin-binding protein, yolk minor form [Source:UniProtKB/Swiss-Prot;Acc:P02752]
ENSGALG00000004267	-7.28667	-0.107269	13.0558	0.000302341	0.0161884	-3.5674	-2.68037	-9.01735	-4.43871	-2.75198	-4.62973	-6.71559	-9.01735	-9.01735	-0.48255	-0.183989	-9.01735	SIGIRR	single Ig IL-1-related receptor [Source:RefSeq peptide;Acc:NP_001186471]
ENSGALG00000006203	-7.32784	-0.703411	18.4431	1.75053e-05	0.00194215	-2.78456	-5.3558	-3.85065	-2.54872	-3.42297	-2.65718	-9.51027	-9.51027	-9.51027	-3.75967	-2.89792	-3.00731	C20orf96	chromosome 20 open reading frame 96 [Source:HGNC Symbol;Acc:HGNC:16227]
ENSGALG00000008890	-7.33563	2.37444	57.9205	2.72926e-14	5.60182e-11	-6.13974	-3.898	-5.01707	-3.42686	-3.62609	-3.05379	-10.7143	-8.97522	-13.0161	-3.1397	-2.97535	-2.67791	ADGRL4	adhesion G protein-coupled receptor L4 [Source:HGNC Symbol;Acc:HGNC:20822]
ENSGALG00000005473	-7.40211	-0.0306601	14.7732	0.000121248	0.00824956	-2.60507	-1.92353	0.679588	0.208251	-0.630034	0.0736778	-7.60791	-7.60791	-7.60791	-7.60791	-1.80375	0.0307008	PNAT3	Arylamine N-acetyltransferase, pineal gland isozyme NAT-3 [Source:UniProtKB/Swiss-Prot;Acc:P13914]
ENSGALG00000011527	-7.41278	0.851499	18.6659	1.55744e-05	0.00177592	-2.97992	-2.72497	-3.61051	-1.01978	-3.34872	-2.39271	-10.8014	-10.8014	-10.8014	-4.75629	-3.24511	-10.8014	ENTPD3	ectonucleoside triphosphate diphosphohydrolase 3 [Source:HGNC Symbol;Acc:HGNC:3365]
ENSGALG00000019233	-7.44156	-0.799456	15.8937	6.70018e-05	0.00546442	-3.62089	-4.22354	-4.69894	-4.25127	-5.83678	-7.17868	-10.6336	-10.6336	-10.6336	-2.90327	-5.72424	-6.32015		Uncharacterized protein [Source:UniProtKB/TrEMBL;Acc:E1C202]
ENSGALG00000017347	-7.49848	6.20797	12.9652	0.00031733	0.0164891	-1.27044	-1.90376	-1.07331	-2.19014	6.93874	-2.19365	-2.81126	0.129394	-2.75226	7.95947	-2.46658	-2.90675	HBE	hemoglobin subunit epsilon [Source:RefSeq peptide;Acc:NP_001075173]
ENSGALG00000008514	-7.50752	-0.593959	11.4717	0.000706624	0.0279809	-9.91684	-2.00685	-4.47487	-4.23402	-4.14618	-3.33677	-9.91684	-9.91684	-9.91684	-7.5764	-1.88085	-7.40063	DLL4	delta-like 4 (Drosophila) [Source:HGNC Symbol;Acc:HGNC:2910]
ENSGALG00000008757	-7.52379	0.581705	14.284	0.000157198	0.00997205	-2.75534	-9.31282	-1.41722	0.391735	-1.50349	-1.52984	-9.31282	-9.31282	-9.31282	-2.19185	-2.21927	-9.31282	CNRIP1	CB1 cannabinoid receptor-interacting protein 1 [Source:RefSeq peptide;Acc:NP_001264459]
ENSGALG00000004632	-7.52856	-0.674986	15.3421	8.96948e-05	0.00673532	-1.72309	-0.254151	-0.44548	-1.63928	-0.405757	-1.23632	-7.03882	-7.03882	-7.03882	-7.03882	0.388142	-0.326536		Uncharacterized protein [Source:UniProtKB/TrEMBL;Acc:F1NJJ7]
ENSGALG00000028207	-7.52959	-0.757733	11.8644	0.000572172	0.0243817	-5.04057	-10.6133	-3.22661	-3.45393	-10.6133	-5.26055	-10.6133	-10.6133	-10.6133	-5.94724	-3.8221	-3.45721	ZBBX	zinc finger, B-box domain containing [Source:HGNC Symbol;Acc:HGNC:26245]
ENSGALG00000009957	-7.54915	1.14864	30.1284	4.04371e-08	1.77851e-05	-3.72105	-3.48919	-2.80093	-2.49237	-2.55976	-2.01327	-10.2178	-7.09184	-10.2178	-4.8377	-0.159488	-1.03377	TIE1	tyrosine kinase with immunoglobulin-like and EGF-like domains 1 [Source:HGNC Symbol;Acc:HGNC:11809]
ENSGALG00000000547	-7.56272	-0.525207	11.5957	0.000661037	0.0268669	-3.93664	-1.50202	-3.83168	-4.80794	-2.81993	-3.34705	-9.38658	-9.38658	-9.38658	-9.38658	-1.24787	-9.38658	CNKSR1	connector enhancer of kinase suppressor of Ras 1 [Source:HGNC Symbol;Acc:HGNC:19700]
ENSGALG00000005502	-7.66365	0.625684	25.146	5.31511e-07	0.000142295	-2.70129	-5.82466	-4.10605	-3.33836	-4.11826	-3.03515	-8.44957	-10.7513	-10.7513	-5.00074	-2.68028	-1.20659	cKv6.3	Uncharacterized protein [Source:UniProtKB/TrEMBL;Acc:E1BQU8]
ENSGALG00000027633	-7.68501	1.88309	57.6008	3.21094e-14	5.64896e-11	-3.113	-3.78272	-3.73878	-2.80542	-3.90836	-2.62987	-11.7177	-9.43527	-8.77134	-2.37044	-1.80156	-1.83328	RASSF9	Ras association (RalGDS/AF-6) domain family (N-terminal) member 9 [Source:HGNC Symbol;Acc:HGNC:15739]
ENSGALG00000001933	-7.70025	-0.739276	12.2425	0.000467132	0.0216623	-4.59415	-10.6604	-4.42539	-3.28675	-6.81259	-4.73455	-10.6604	-10.6604	-10.6604	-10.6604	-3.46804	-3.28341	CORO2A	coronin, actin binding protein, 2A [Source:HGNC Symbol;Acc:HGNC:2255]
ENSGALG00000011202	-7.73955	-0.667206	15.1395	9.98505e-05	0.00714918	-4.92033	-7.71163	-6.78993	-4.57027	-6.11341	-4.68829	-11.4778	-11.4778	-11.4778	-4.3996	-3.94647	-11.4778	COLQ	collagen-like tail subunit (single strand of homotrimer) of asymmetric acetylcholinesterase [Source:HGNC Symbol;Acc:HGNC:2226]
ENSGALG00000027232	-7.80644	-1.30632	14.2568	0.00015948	0.00997205	-6.00356	-4.55109	-5.18968	-7.18446	-6.35234	-6.20953	-9.66447	-9.66447	-9.66447	-9.66447	-2.37959	-2.16949	C1QTNF2	complement C1q tumor necrosis factor-related protein 2 precursor [Source:RefSeq peptide;Acc:NP_001264631]
ENSGALG00000008702	-7.82932	-0.255262	23.358	1.34486e-06	0.000301125	-1.80962	-2.31097	-2.50622	-3.07885	-2.93626	-2.06698	-9.20163	-9.20163	-9.20163	-2.41055	-3.48332	-1.70665	OVOL2	ovo-like zinc finger 2 [Source:HGNC Symbol;Acc:HGNC:15804]
ENSGALG00000001242	-7.83504	-0.705701	15.2157	9.59042e-05	0.00698852	-4.57309	-2.21015	-3.58227	-1.50784	-2.63096	-3.92454	-8.62023	-8.62023	-8.62023	-1.00479	-1.42784	-8.62023		Uncharacterized protein [Source:UniProtKB/TrEMBL;Acc:H9KYZ6]
ENSGALG00000000820	-7.84457	-0.656808	18.3305	1.85708e-05	0.00200613	-0.792	-0.760935	-0.294264	-0.480094	-2.39539	-2.24385	-6.93954	-6.93954	-6.93954	0.871361	-0.148356	-3.55527	HTR1D	5-hydroxytryptamine (serotonin) receptor 1D, G protein-coupled [Source:HGNC Symbol;Acc:HGNC:5289]
ENSGALG00000005348	-7.85693	0.59145	28.19	1.0997e-07	3.66021e-05	-5.39083	-2.66913	-3.78215	-3.99284	-3.64079	-3.17891	-7.90567	-10.2074	-10.2074	-2.42288	-0.42769	-3.31237	RBBP8NL	RBBP8 N-terminal like [Source:HGNC Symbol;Acc:HGNC:16144]
ENSGALG00000026333	-7.86356	-1.04389	16.8289	4.09048e-05	0.00381623	-1.87517	-5.56237	-3.46666	-4.5969	-1.67608	-3.55383	-7.94145	-7.94145	-7.94145	-0.699325	-2.22314	-0.738391	GNGT2	guanine nucleotide binding protein (G protein), gamma transducing activity polypeptide 2 [Source:HGNC Symbol;Acc:HGNC:4412]
ENSGALG00000025876	-7.88025	-0.654389	21.6778	3.22508e-06	0.000587313	-3.48414	-1.93289	-2.96214	-1.30302	-0.909821	-1.41427	-7.83565	-7.83565	-7.83565	-1.70435	-1.48339	-0.163263	Tpo	thrombopoietin precursor [Source:RefSeq peptide;Acc:NP_001001784]
ENSGALG00000028341	-7.93867	-0.684399	19.0147	1.29716e-05	0.00150703	-3.63237	-2.2344	-2.3864	-5.75509	-2.24582	-1.05017	-8.23509	-8.23509	-8.23509	-1.554	-1.0749	-1.28391	MADCAM1	mucosal vascular addressin cell adhesion molecule 1 [Source:HGNC Symbol;Acc:HGNC:6765]
ENSGALG00000001869	-7.95637	-0.692516	20.1106	7.30913e-06	0.00102566	-2.30331	-1.93466	-4.60496	-2.38515	-0.985974	-0.896014	-7.61904	-7.61904	-7.61904	-0.630335	0.00964208	-2.02784	LINGO2	leucine rich repeat and Ig domain containing 2 [Source:HGNC Symbol;Acc:HGNC:21207]
ENSGALG00000000736	-7.96983	-1.27121	13.9335	0.000189396	0.0112677	-5.08436	-8.74527	-5.73118	-8.74527	-3.09774	-4.35765	-8.74527	-8.74527	-8.74527	-1.22244	-4.94701	-1.25029	MATK	megakaryocyte-associated tyrosine kinase [Source:HGNC Symbol;Acc:HGNC:6906]
ENSGALG00000007157	-7.98009	-0.184351	18.231	1.95668e-05	0.00207728	0.146111	0.229902	-0.893812	-1.62727	-1.54918	-1.19023	-7.43328	-7.43328	-7.43328	-7.43328	0.0204945	0.239103	FAM46D	family with sequence similarity 46, member D [Source:HGNC Symbol;Acc:HGNC:28399]
ENSGALG00000008709	-7.98267	-0.45984	11.6279	0.0006497	0.0267288	-5.22008	-3.06793	-3.62616	-8.19002	-6.43242	-4.24864	-10.67	-10.67	-10.67	-2.10395	-10.67	-10.67	MCOLN3	mucolipin 3 [Source:HGNC Symbol;Acc:HGNC:13358]
ENSGALG00000004921	-8.01553	0.436752	19.5823	9.63592e-06	0.00122764	-4.44685	-4.07771	-8.65715	-3.48656	-6.80839	-7.06032	-12.5791	-12.5791	-12.5791	-5.5449	-5.55536	-5.57386	SLC6A1	solute carrier family 6 (neurotransmitter transporter), member 1 [Source:HGNC Symbol;Acc:HGNC:11042]
ENSGALG00000003951	-8.03821	-0.729882	12.8163	0.000343619	0.0171206	-3.67232	-3.56141	-1.79621	-8.84008	-5.52795	-2.33717	-8.84008	-8.84008	-8.84008	-8.84008	-1.92795	-0.737802	SASH3	SAM and SH3 domain-containing protein 3 [Source:RefSeq peptide;Acc:NP_001026281]
ENSGALG00000019211	-8.11548	-0.590153	20.2025	6.9661e-06	0.00100315	-3.1762	-6.23788	-3.98823	-3.09652	-5.20721	-5.61645	-10.0041	-10.0041	-10.0041	-2.38862	-3.39171	-3.05288	MAEL	maelstrom spermatogenic transposon silencer [Source:HGNC Symbol;Acc:HGNC:25929]
ENSGALG00000005305	-8.14176	-0.357137	16.91	3.91936e-05	0.0036845	-0.376959	-7.70067	-1.85197	-0.408934	-3.46306	-0.618108	-7.70067	-7.70067	-7.70067	-0.807393	-1.89651	0.27204	ACKR2	atypical chemokine receptor 2 [Source:HGNC Symbol;Acc:HGNC:1565]
ENSGALG00000010417	-8.19439	-0.383638	15.255	9.39263e-05	0.00692636	-3.59841	-3.42487	-4.0025	-3.03132	-4.10588	-4.42757	-10.0952	-10.0952	-10.0952	-10.0952	-6.67778	-1.34498		vitamin D3 hydroxylase-associated protein [Source:RefSeq peptide;Acc:NP_990307]
ENSGALG00000007458	-8.20533	6.23727	14.6292	0.000130873	0.00866509	-3.49298	-1.94173	-3.1566	-2.29636	6.8899	-1.50952	-2.14134	-1.17932	-1.43765	8.24742	-1.33062	-5.32827	HBZ	Hemoglobin subunit pi [Source:UniProtKB/Swiss-Prot;Acc:P02007]
ENSGALG00000001115	-8.29495	-0.980326	12.9281	0.00032369	0.016706	-7.70002	-6.90083	-9.17848	-8.01639	-5.27364	-11.3609	-11.3609	-11.3609	-11.3609	-3.10428	-11.3609	-3.98391	MMEL1	membrane metallo-endopeptidase-like 1 [Source:HGNC Symbol;Acc:HGNC:14668]
ENSGALG00000022696	-8.30449	-0.455274	18.3074	1.87976e-05	0.00201297	-2.27611	-0.120293	-2.55389	-0.68431	-4.27973	-2.42673	-7.59185	-7.59185	-7.59185	-2.71155	-1.48777	0.972925	KCNE3	potassium channel, voltage gated subfamily E regulatory beta subunit 3 [Source:HGNC Symbol;Acc:HGNC:6243]
ENSGALG00000000437	-8.31786	-1.05945	14.2564	0.00015952	0.00997205	-8.40047	-2.97353	-8.40047	-5.92047	-5.08835	-8.40047	-8.40047	-8.40047	-8.40047	-0.22263	-2.43857	-1.39528		embryonic pepsinogen precursor [Source:RefSeq peptide;Acc:NP_990385]
ENSGALG00000012907	-8.32449	-1.22765	11.1213	0.000853419	0.0322388	-6.74853	-6.74853	-6.74853	-6.74853	-6.74853	-2.75316	-6.74853	-6.74853	-6.74853	0.240178	-6.74853	1.72339	MC4R	melanocortin receptor 4 [Source:RefSeq peptide;Acc:NP_001026685]
ENSGALG00000026727	-8.34118	-0.179227	20.1053	7.32915e-06	0.00102566	-8.93171	-3.68113	-5.46218	-5.29993	-3.29955	-6.05431	-11.2194	-11.2194	-11.2194	-3.97732	-3.84764	-3.80201	SLC30A10	solute carrier family 30, member 10 [Source:HGNC Symbol;Acc:HGNC:25355]
ENSGALG00000027789	-8.34159	-0.569472	23.4464	1.28441e-06	0.000292917	-3.51232	-3.77123	-3.64328	-2.59591	-3.68528	-4.50249	-9.19818	-9.19818	-9.19818	-3.34259	-1.9133	-1.09591	RAB37	RAB37, member RAS oncogene family [Source:HGNC Symbol;Acc:HGNC:30268]
ENSGALG00000003028	-8.34922	0.243433	20.1918	7.00535e-06	0.00100315	-5.71879	-2.84994	-3.29742	-3.24798	-3.54552	-6.33883	-11.0345	-11.0345	-11.0345	-7.84404	-3.47822	-2.83638	ADAMTS13	ADAM metallopeptidase with thrombospondin type 1 motif, 13 [Source:HGNC Symbol;Acc:HGNC:1366]
ENSGALG00000018878	-8.35442	-0.207608	14.3395	0.000152628	0.00978967	-2.8621	-1.65915	-3.5973	-7.20995	-9.68996	-3.26858	-9.68996	-9.68996	-9.68996	-1.28754	-2.43525	-9.68996		Uncharacterized protein [Source:UniProtKB/TrEMBL;Acc:H9KZL5]
ENSGALG00000014987	-8.41366	0.0632436	19.5756	9.66958e-06	0.00122764	-5.90488	-4.60483	-3.62746	-1.7094	-4.32852	-4.98886	-10.5076	-10.5076	-10.5076	-7.31711	-2.30426	-2.8022	OTOP1	otopetrin 1 [Source:HGNC Symbol;Acc:HGNC:19656]
ENSGALG00000012117	-8.48619	-0.189231	21.5233	3.49558e-06	0.00060631	-4.13089	-2.96214	-5.69073	-7.21969	-3.22634	-5.04551	-10.5642	-10.5642	-10.5642	-2.36629	-4.33074	-3.14682	STEAP3	STEAP family member 3, metalloreductase [Source:HGNC Symbol;Acc:HGNC:24592]
ENSGALG00000005474	-8.5263	-0.211665	21.2623	4.00542e-06	0.00065769	-6.64131	-2.31954	-2.44553	-1.40422	-3.56463	-2.88951	-8.92904	-8.92904	-8.92904	-0.509394	-1.70515	-2.96625	PNAT10	arylamine N-acetyltransferase, pineal gland isozyme NAT-10 [Source:RefSeq peptide;Acc:NP_990671]
ENSGALG00000009041	-8.5308	0.0881449	19.3556	1.085e-05	0.00134967	-1.25391	-2.78412	-3.43695	-2.1806	-1.8563	-3.67547	-9.1942	-9.1942	-9.1942	-1.12133	-1.03906	-9.1942		Uncharacterized protein [Source:UniProtKB/TrEMBL;Acc:F1NGZ1]
ENSGALG00000027067	-8.54987	-0.494389	15.1681	9.83536e-05	0.00712485	-3.79494	-9.24488	-3.92542	-2.39344	-4.70072	-3.1	-9.24488	-9.24488	-9.24488	-9.24488	-1.87308	-0.609897	C1QTNF6	C1q and tumor necrosis factor related protein 6 [Source:HGNC Symbol;Acc:HGNC:14343]
ENSGALG00000023740	-8.57578	7.00469	16.3517	5.2609e-05	0.00459489	-4.05176	-3.84795	-3.7053	-3.27162	5.56607	-3.02637	-4.47317	-2.77038	-2.97343	6.91903	-3.58807	-4.6636	HBZ	Hemoglobin subunit pi [Source:UniProtKB/Swiss-Prot;Acc:P02007]
ENSGALG00000004365	-8.58579	0.138417	29.3387	6.07696e-08	2.33868e-05	-4.32737	-3.10965	-3.39286	-2.9501	-3.54909	-3.75189	-10.4749	-10.4749	-10.4749	-2.19922	-4.01293	-2.97994	WDR66	WD repeat domain 66 [Source:HGNC Symbol;Acc:HGNC:28506]
ENSGALG00000003595	-8.59548	-0.525895	20.4161	6.23051e-06	0.000935175	-5.07454	-2.78471	-6.93923	-3.88779	-3.35102	-3.60295	-9.12168	-9.12168	-9.12168	-4.24139	-1.21556	-0.833632	SARM1	sterile alpha and TIR motif containing 1 [Source:HGNC Symbol;Acc:HGNC:17074]
ENSGALG00000010500	-8.61146	0.956412	16.0301	6.23418e-05	0.00515261	0.944935	-0.507627	0.861633	1.31612	-1.13908	-0.465521	-7.83565	-7.83565	-7.83565	1.35984	-7.83565	-7.83565	Nkx-6.2	homeobox protein Nkx-6.2 [Source:RefSeq peptide;Acc:NP_001186477]
ENSGALG00000012327	-8.75295	0.548671	34.0769	5.29762e-09	3.4337e-06	-3.70487	-2.34584	-2.35782	-2.44777	-3.07915	-3.19174	-10.3767	-10.3767	-10.3767	-2.08216	-2.72463	-3.31939	INHBA	inhibin beta A chain precursor [Source:RefSeq peptide;Acc:NP_990727]
ENSGALG00000017046	-8.80613	3.21009	55.6378	8.71308e-14	1.34127e-10	-1.98623	-5.44171	-0.609908	-1.07098	-1.55207	-1.3539	-11.8518	-8.72583	-11.8518	-1.86149	-2.21098	-0.741745	OSF-2	periostin precursor [Source:RefSeq peptide;Acc:NP_001025712]
ENSGALG00000011344	-8.82233	-0.0191313	13.5587	0.000231221	0.0132441	0.367745	-7.42877	-2.39081	-0.0954812	-0.931754	-4.84792	-7.42877	-7.42877	-7.42877	1.82552	-1.32469	-7.42877	TTLL2	tubulin tyrosine ligase-like family member 2 [Source:HGNC Symbol;Acc:HGNC:21211]
ENSGALG00000006236	-8.86898	0.230292	28.2028	1.09247e-07	3.66021e-05	-3.93215	-4.35892	-2.89747	-3.85571	-2.59761	-2.51049	-10.1566	-10.1566	-10.1566	-1.18812	-3.86252	-3.20544	TPH1	Tryptophan 5-hydroxylase 1 [Source:UniProtKB/Swiss-Prot;Acc:P70080]
ENSGALG00000010513	-8.87801	0.116517	17.0724	3.59815e-05	0.00346181	-3.44043	-5.99793	-2.14916	-0.902401	-3.86681	-3.42871	-9.23121	-9.23121	-9.23121	0.0326483	-2.71734	-9.23121	TCTN3	tectonic-3 [Source:RefSeq peptide;Acc:NP_001098788]
ENSGALG00000013603	-8.96557	0.305734	34.1108	5.20604e-09	3.4337e-06	0.647527	1.65609	0.894631	1.05832	0.908165	1.52091	-5.84922	-5.84922	-5.84922	1.22899	2.50405	2.32555	MYCT1	myc target 1 [Source:HGNC Symbol;Acc:HGNC:23172]
ENSGALG00000023296	-9.02344	0.156096	28.7919	8.05873e-08	2.91892e-05	-2.2783	-3.5761	-1.57993	-3.45606	-1.80621	-0.594802	-8.50277	-8.50277	-8.50277	-0.519756	-1.21789	0.0439047	SCL	Gallus gallus T-cell acute lymphocytic leukemia 1 (TAL1), mRNA. [Source:RefSeq mRNA;Acc:NM_205352]
ENSGALG00000005932	-9.03904	0.78988	21.545	3.45614e-06	0.00060631	-4.21769	-6.79087	-6.73987	-3.66264	-4.19642	-5.73548	-12.5886	-12.5886	-12.5886	-3.33428	-5.10847	-12.5886	MYT1	myelin transcription factor 1 [Source:HGNC Symbol;Acc:HGNC:7622]
ENSGALG00000014759	-9.12624	0.338391	32.5095	1.18612e-08	6.63958e-06	-5.27458	-3.35925	-4.87583	-3.93146	-3.74665	-2.8468	-10.7245	-10.7245	-10.7245	-3.6463	-2.50547	-2.05567	STYK1	serine/threonine/tyrosine kinase 1 [Source:HGNC Symbol;Acc:HGNC:18889]
ENSGALG00000028653	-9.19313	0.507861	28.7925	8.05609e-08	2.91892e-05	-2.59528	-3.21331	-1.88458	-2.67875	-2.95776	-2.80103	-9.88359	-9.88359	-9.88359	-3.67098	-4.07944	-0.329757	C6orf163	chromosome 6 open reading frame 163 [Source:HGNC Symbol;Acc:HGNC:21403]
ENSGALG00000006003	-9.31501	0.0786948	26.5079	2.62467e-07	7.63006e-05	-2.19711	-2.22716	-2.13885	-3.33025	-8.56414	-2.52461	-8.56414	-8.56414	-8.56414	-0.861663	-1.43688	0.68849		Uncharacterized protein [Source:UniProtKB/TrEMBL;Acc:E1C6S6]
ENSGALG00000006602	-9.32697	0.607237	23.1797	1.47546e-06	0.00032447	-1.03452	-0.957562	-0.998507	-0.694223	-3.31102	-0.606646	-8.32283	-8.32283	-8.32283	1.13695	-0.304687	-8.32283	SYT8	synaptotagmin VIII [Source:HGNC Symbol;Acc:HGNC:19264]
ENSGALG00000024379	-9.352	2.67048	78.6348	7.47222e-19	2.39188e-15	-1.79169	-1.24292	-2.55061	-1.00851	-1.94025	-0.122146	-10.8704	-8.58801	-10.8704	-1.26803	-0.447417	-0.569553		Uncharacterized protein [Source:UniProtKB/TrEMBL;Acc:F1NUH5]
ENSGALG00000002829	-9.35518	0.238122	33.6965	6.44173e-09	3.96649e-06	-5.07566	-3.12211	-3.68082	-2.21526	-2.55615	-2.20884	-9.1228	-9.1228	-9.1228	-2.08864	-0.249173	-0.540149	SCARF1	scavenger receptor class F, member 1 [Source:HGNC Symbol;Acc:HGNC:16820]
ENSGALG00000005272	-9.48711	4.72486	162.089	3.95615e-37	4.872e-33	-1.91104	-0.154433	-0.967552	0.214509	-0.0411103	0.664046	-7.2565	-11.6248	-9.50244	-0.279186	1.2565	1.14974	CDH5	Cadherin-5 [Source:UniProtKB/Swiss-Prot;Acc:Q8AYD0]
ENSGALG00000011784	-9.56333	0.533019	20.6425	5.53531e-06	0.000865492	-6.19367	-2.42749	-6.19367	0.475048	1.92476	1.88356	-6.19367	-6.19367	-6.19367	-6.19367	3.11396	2.77617	APOLD1	apolipoprotein L domain containing 1 [Source:HGNC Symbol;Acc:HGNC:25268]
ENSGALG00000004781	-9.56555	1.0395	42.4088	7.40578e-11	8.29111e-08	-3.71353	-3.57464	-4.60449	-2.77834	-3.3662	-3.76844	-11.4846	-11.4846	-11.4846	-3.72692	-3.679	-2.03408	ZBTB40	zinc finger and BTB domain containing 40 [Source:HGNC Symbol;Acc:HGNC:29045]
ENSGALG00000003399	-9.80246	0.956236	27.677	1.4336e-07	4.646e-05	-6.89472	-0.464079	-3.01685	-2.8001	-0.560328	-2.60238	-9.18245	-9.18245	-9.18245	-1.2228	0.498628	-1.10518	SELE	selectin E [Source:HGNC Symbol;Acc:HGNC:10718]
ENSGALG00000009791	-9.94534	1.39268	42.189	8.28664e-11	8.50416e-08	-5.29183	-2.98948	-4.23334	-2.74335	-4.6021	-4.1707	-12.0175	-12.0175	-12.0175	-2.25805	-4.38885	-3.3156	PROX1	prospero homeobox protein 1 [Source:RefSeq peptide;Acc:NP_001005616]
ENSGALG00000002118	-10.0369	0.418086	27.4547	1.60819e-07	5.07818e-05	-9.87284	-3.78045	-5.95093	-9.87284	-9.87284	-7.29199	-9.87284	-9.87284	-9.87284	-0.472555	-2.24415	-0.412586	CO6	calcium-activated potassium channel subunit beta-1 [Source:RefSeq peptide;Acc:NP_989933]
ENSGALG00000017345	-10.5739	7.14801	10.8052	0.00101213	0.0363813	-3.02667	-3.61199	-3.15351	-3.49681	8.36443	-4.79733	-7.37818	-1.23722	-3.52859	9.59536	-5.2982	-7.37818	HBG1	Hemoglobin subunit rho [Source:UniProtKB/Swiss-Prot;Acc:P02127]
ENSGALG00000015568	-11.0023	1.90165	50.693	1.08003e-12	1.47784e-09	-4.32252	-2.52345	-4.92926	-3.18537	-3.70887	-3.29869	-11.5745	-11.5745	-11.5745	-0.789066	-1.38282	-4.41847	SH3TC1	SH3 domain and tetratricopeptide repeats 1 [Source:HGNC Symbol;Acc:HGNC:26009]
ENSGALG00000028273	-11.1513	1.7653	11.9312	0.000552018	0.0238497	-7.95469	-7.95469	-7.95469	-7.95469	1.88539	-7.95469	-7.95469	-7.95469	-7.95469	3.78137	-7.95469	-7.95469	HBG2	Hemoglobin subunit beta [Source:UniProtKB/Swiss-Prot;Acc:P02112]
ENSGALG00000016215	-11.2053	2.53997	78.5578	7.769e-19	2.39188e-15	-2.34642	-1.86337	-2.0184	-0.727647	-1.43809	-0.458666	-10.6656	-10.6656	-10.6656	-2.37112	0.222997	-0.285952	CXorf36	chromosome X open reading frame 36 [Source:HGNC Symbol;Acc:HGNC:25866]
ENSGALG00000007468	-11.3396	6.5899	10.9034	0.000959887	0.0351563	-6.44495	-6.44495	-6.44495	-6.44495	8.5285	-6.44495	-6.44495	-1.44859	-4.32262	10.0524	-4.36498	-6.44495	HBAA	Gallus gallus hemoglobin, alpha 1 (HBAA), mRNA. [Source:RefSeq mRNA;Acc:NM_001004376]
ENSGALG00000016076	-12.1835	2.7517	108.404	2.19235e-25	1.34994e-21	-3.73315	-3.30974	-3.7636	-3.02398	-2.79756	-3.42904	-11.452	-11.452	-11.452	-0.278551	-1.55043	0.407612	DPYS	dihydropyrimidinase isoform 2 [Source:RefSeq peptide;Acc:NP_001264356]

## Sheet: Stream_13_v_Stream_15_bulk
geneId	logFC	logCPM	LR	PValue	FDR	Stream_13_2	Stream_13_3	Stream_13_4	Stream_15_1	Stream_15_2	Stream_15_3	Trailblazer_13_2	Trailblazer_13_3	Trailblazer_13_4	Trailblazer_15_1	Trailblazer_15_2	Trailblazer_15_3	Name	Description
ENSGALG00000018439	-2.70559	3.89117	39.0212	4.19233e-10	5.16286e-06	2.27249	1.81126	1.76861	4.59834	4.87253	4.52274	3.92057	4.96017	4.9247	5.2241	5.06457	5.09417	DLX1	Gallus gallus distal-less homeobox 1 (DLX1), mRNA. [Source:RefSeq mRNA;Acc:NM_001045842]

## Sheet: Front_v_Stream_13and15_overlap
geneId	Name	HH13_FRONT_v_STREAM_logFC	HH13_FRONT_v_STREAM_FDR	HH15_FRONT_v_STREAM_logFC	HH15_FRONT_v_STREAM_FDR
ENSGALG00000009844	ACTC1	4.93917	0.0436126	8.03168	0.00210185
ENSGALG00000026787	HAND1	4.78959	0.000318315	7.16784	2.47296e-06
ENSGALG00000014847	MYOM1	4.43902	0.0127393	5.9932	0.00164961
ENSGALG00000007831	TLX1	4.28514	7.13782e-05	3.94273	0.000439399
ENSGALG00000006421	SLC16A12	4.19353	7.13782e-05	3.22977	0.0060411
ENSGALG00000005352	GATA5	4.12103	4.25365e-05	4.53938	1.39659e-05
ENSGALG00000000302	TNNT2	4.03693	0.00412968	5.2413	0.000368782
ENSGALG00000023195	DLX6	3.91159	0.000279022	3.16402	0.00804963
ENSGALG00000006343	ACTG2	3.73411	4.04959e-06	2.52546	0.00726763
ENSGALG00000006104	ADAMTSL3	3.59939	9.41269e-07	2.87911	0.000252093
ENSGALG00000003814	Dkk-1	3.54127	0.000224521	2.69927	0.014876
ENSGALG00000000365	NKX2-6	3.48842	0.00938403	3.40875	0.0237798
ENSGALG00000014976	GATA6	3.44406	0.00317373	4.60601	0.00014477
ENSGALG00000005323	DIRAS2	3.4402	0.0104504	3.48714	0.0230653
ENSGALG00000002886	NKX2-5	3.1014	0.000466394	3.98652	1.18517e-05
ENSGALG00000002355	RBPMS2	3.05456	1.62298e-06	3.02446	6.2629e-06
ENSGALG00000000313	TNNI1	3.0482	7.37389e-05	2.17755	0.0173786
ENSGALG00000007837	KAZALD1	2.74272	2.14332e-07	2.65242	1.44024e-06
ENSGALG00000005493	ITGB1BP2	2.69509	0.0282788	2.87559	0.0399895
ENSGALG00000027532	COLEC11	2.65148	0.000233997	3.34865	3.69101e-06
ENSGALG00000001857	FAM132A	2.63139	0.0195358	2.94231	0.0143923
ENSGALG00000015148	ANXA1	2.18845	0.000223845	2.63547	1.18517e-05
ENSGALG00000011902	TAGLN	2.12487	0.0365928	2.29841	0.0419967
ENSGALG00000012290	SOX10	-2.50157	0.0296923	-2.74028	0.0318845
ENSGALG00000023689	ASS1	-2.51719	0.00142342	-3.17081	6.23368e-05
ENSGALG00000006054	CALCA	-2.8638	0.0450119	-3.65179	0.0147878
ENSGALG00000001150		-3.9141	0.00283732	-5.42718	8.77163e-05
ENSGALG00000003014	CHRNA3	-4.05013	0.00204821	-3.33804	0.0318845
ENSGALG00000025821	CLDN16	-4.74603	0.0398191	-9.0492	0.000979556
ENSGALG00000025748	Fgf9	-5.17816	0.00317373	-4.94195	0.00794709
ENSGALG00000002118	CO6	-5.77859	0.0329084	7.97533	0.00104597
ENSGALG00000008570	MOV10L1	-5.80032	0.0235856	-6.9794	0.0272993
ENSGALG00000006106		-5.95407	0.016466	-8.02735	0.00594289
ENSGALG00000013659	NOX3	-6.43713	0.000791734	-8.35292	0.000124834
ENSGALG00000020292	GABRE	-6.47894	0.00308409	-6.99317	0.0116823
ENSGALG00000014994		-6.77899	0.000226294	-4.94692	0.0237798
ENSGALG00000026853	FGF3	-7.86435	2.38012e-08	-3.66913	0.0103033
ENSGALG00000016076	DPYS	-8.8613	9.31989e-11	2.79352	0.00381691
ENSGALG00000003895	PRDM12	-9.20355	0.000119753	-7.48755	0.00594289
ENSGALG00000009853	FOXG1	-9.26809	2.27032e-05	-4.29444	0.0434347
ENSGALG00000008908	NEUROD1	-9.38237	2.17574e-06	-10.0698	1.44024e-06
ENSGALG00000015347	ZPLD1	-9.65011	0.000648353	-10.3025	0.000702272
