# Supplementary material for: Single-cell transcriptome analysis of avian neural crest migration reveals signatures of invasion and molecular transitions
Source: eLife. 2017 Dec 4;6:e28415. doi: 10.7554/eLife.28415 (PMC5728719; doi:10.7554/eLife.28415)
Supplement: Figure 2—source data 2. — Differential expression threshold was set at log2 FC greater than 2 or less than −2 and adjusted p value less than 0.05. [file elife-28415-fig2-data2.xlsx]

## Sheet: In Vivo_vs_In Vitro
ensid	Name	Chr	Start	End	Strand	Biotype	Description	in_vivo_vs_in_vitro.log2fc	in_vivo_vs_in_vitro.log2cpm	in_vivo_vs_in_vitro.pval	in_vivo_vs_in_vitro.padj
ENSGALG00000008455	SEMA3C	chr1	10867382	10986273	+	protein_coding	semaphorin-3C precursor [Source:RefSeq peptide;Acc:NP_989574]	2.41252	5.13044	0.010688	0.0401263
ENSGALG00000008298	P37NB	chr1	12679724	12694908	+	protein_coding	leucine-rich repeat-containing protein 17 precursor [Source:RefSeq peptide;Acc:NP_001185529]	3.9171	1.28984	0.00185238	0.00968622
ENSGALG00000007917	LAMB4	chr1	14725779	14766576	-	protein_coding	laminin, beta 4 [Source:HGNC Symbol;Acc:HGNC:6491]	2.8879	2.75092	0.000155049	0.00122085
ENSGALG00000008635		chr1	20126933	20130565	-	protein_coding	Uncharacterized protein [Source:UniProtKB/TrEMBL;Acc:F1NLQ7]	8.06627	6.31767	1.1203e-06	1.69401e-05
ENSGALG00000008805	LMOD2	chr1	22047781	22055493	-	protein_coding	leiomodin-2 [Source:RefSeq peptide;Acc:NP_001186644]	2.5769	-0.148948	0.00156109	0.00846769
ENSGALG00000008926	CADPS2	chr1	22359460	22601087	+	protein_coding	Ca++-dependent secretion activator 2 [Source:HGNC Symbol;Acc:HGNC:16018]	2.94428	3.5233	0.0011558	0.00663147
ENSGALG00000008961	PTPRZ1	chr1	22669170	22806015	-	protein_coding	receptor-type tyrosine-protein phosphatase zeta precursor [Source:RefSeq peptide;Acc:NP_001186241]	2.5939	6.29848	0.000405488	0.00273086
ENSGALG00000026138		chr1	22776957	22777065	+	miRNA		2.32244	0.475238	0.000358036	0.00246609
ENSGALG00000009002	CPED1	chr1	23043272	23183320	-	protein_coding	cadherin-like and PC-esterase domain containing 1 [Source:HGNC Symbol;Acc:HGNC:26159]	9.66237	4.94772	1.78248e-20	2.64475e-18
ENSGALG00000025216	gga-mir-1645	chr1	23147247	23147310	-	miRNA	gga-mir-1645 [Source:miRBase;Acc:MI0007377]	3.88141	0.2999	8.78373e-11	2.85001e-09
ENSGALG00000009638	ANO6	chr1	30541566	30613151	+	protein_coding	anoctamin 6 [Source:HGNC Symbol;Acc:HGNC:25240]	4.36446	1.55157	0.000352672	0.00243267
ENSGALG00000009867	WIF1	chr1	33841539	33883296	-	protein_coding	wnt inhibitory factor 1 precursor [Source:RefSeq peptide;Acc:NP_001186536]	7.92339	3.28216	4.01881e-09	9.97281e-08
ENSGALG00000010029	BEST3	chr1	35488978	35512697	-	protein_coding	bestrophin-3 [Source:RefSeq peptide;Acc:NP_001186598]	2.25337	0.332593	0.000461256	0.00305162
ENSGALG00000010049	PTPRB	chr1	35803701	35863585	-	protein_coding	protein tyrosine phosphatase, receptor type, B [Source:HGNC Symbol;Acc:HGNC:9665]	2.99769	2.80185	0.000530489	0.00343504
ENSGALG00000010208	CAPS2	chr1	37663436	37692817	-	protein_coding	calcyphosine 2 [Source:HGNC Symbol;Acc:HGNC:16471]	2.94126	1.40199	0.0120371	0.0440308
ENSGALG00000028946	CSRP2	chr1	38160285	38171384	-	protein_coding	Cysteine and glycine-rich protein 2 [Source:UniProtKB/Swiss-Prot;Acc:P50460]	2.36549	6.47843	7.42112e-07	1.17413e-05
ENSGALG00000028091	MYF5	chr1	39931917	39937449	+	protein_coding	myogenic factor 5 [Source:RefSeq peptide;Acc:NP_001025534]	4.2812	2.48003	1.07729e-07	2.09631e-06
ENSGALG00000028360	MGAT4C	chr1	42095834	42213439	-	protein_coding	MGAT4 family, member C [Source:HGNC Symbol;Acc:HGNC:30871]	3.88963	0.258291	0.000235934	0.00174127
ENSGALG00000011206	KITLG	chr1	42864376	42916342	-	protein_coding	Kit ligand Processed kit ligand [Source:UniProtKB/Swiss-Prot;Acc:Q09108]	3.06973	2.79961	0.000853063	0.00515529
ENSGALG00000011207	MKP3	chr1	43171637	43175978	-	protein_coding	dual specificity protein phosphatase 6 [Source:RefSeq peptide;Acc:NP_989685]	2.14104	5.64608	1.35149e-11	4.97434e-10
ENSGALG00000011269	EPYC	chr1	43798643	43821219	-	protein_coding	Epiphycan [Source:UniProtKB/Swiss-Prot;Acc:Q90944]	3.04573	-0.0118162	0.000417841	0.00279687
ENSGALG00000011271	LUM	chr1	43860883	43872867	-	protein_coding	Lumican [Source:UniProtKB/Swiss-Prot;Acc:P51890]	3.70927	6.53269	9.6712e-05	0.000819979
ENSGALG00000011274	DCN	chr1	43894096	43932320	-	protein_coding	decorin precursor [Source:RefSeq peptide;Acc:NP_001025918]	3.34342	4.0818	0.00115646	0.00663147
ENSGALG00000011435	ELK3	chr1	45621783	45655886	+	protein_coding	ETS domain-containing protein Elk-3 [Source:RefSeq peptide;Acc:NP_001025920]	2.39052	6.89621	5.38447e-16	4.05801e-14
ENSGALG00000011582	SLC17A8	chr1	47112357	47141991	+	protein_coding	solute carrier family 17 (vesicular glutamate transporter), member 8 [Source:HGNC Symbol;Acc:HGNC:20151]	3.10396	-0.012112	0.000939973	0.00558107
ENSGALG00000011809	GRIN2B	chr1	48326390	48527237	-	protein_coding	glutamate receptor, ionotropic, N-methyl D-aspartate 2B [Source:HGNC Symbol;Acc:HGNC:4586]	2.76495	0.0243933	0.00548025	0.0234417
ENSGALG00000012422		chr1	51030351	51038344	-	protein_coding	Uncharacterized protein [Source:UniProtKB/TrEMBL;Acc:F1NDY2]	3.63506	0.200278	0.000317306	0.00223196
ENSGALG00000012457	SS3R	chr1	51269724	51274129	+	protein_coding	somatostatin receptor type 3 [Source:RefSeq peptide;Acc:NP_001019754]	4.18861	0.443943	0.000146657	0.00116408
ENSGALG00000027067	C1QTNF6	chr1	51283694	51289313	+	protein_coding	C1q and tumor necrosis factor related protein 6 [Source:HGNC Symbol;Acc:HGNC:14343]	5.5071	1.24994	1.35428e-05	0.00015106
ENSGALG00000012542	RASD2	chr1	51881968	51884335	-	protein_coding	RASD family, member 2 [Source:HGNC Symbol;Acc:HGNC:18229]	3.84313	0.286023	0.000137861	0.00110073
ENSGALG00000026311	OCC-1	chr1	54142067	54158684	-	protein_coding	Overexpressed in colon carcinoma 1 protein homolog [Source:UniProtKB/Swiss-Prot;Acc:P0C915]	2.0021	3.34831	0.00029528	0.00210615
ENSGALG00000012751	STAB2	chr1	54927408	55004223	-	protein_coding	stabilin 2 [Source:HGNC Symbol;Acc:HGNC:18629]	5.46696	1.64819	4.99636e-05	0.000469757
ENSGALG00000012988	B4GALNT3	chr1	60438890	60496703	+	protein_coding	beta-1,4-N-acetyl-galactosaminyl transferase 3 [Source:HGNC Symbol;Acc:HGNC:24137]	4.68822	2.81061	2.48565e-05	0.000256122
ENSGALG00000012998	WNT5B	chr1	61044205	61059847	+	protein_coding	protein Wnt-5b precursor [Source:RefSeq peptide;Acc:NP_001032346]	2.82925	3.95029	0.000158354	0.00123978
ENSGALG00000013071	CALD1	chr1	62400842	62587151	+	protein_coding	caldesmon [Source:RefSeq peptide;Acc:NP_989489]	3.26876	5.86713	6.52305e-11	2.15079e-09
ENSGALG00000014232	RIBC2	chr1	70569531	70584392	+	protein_coding	RIB43A domain with coiled-coils 2 [Source:HGNC Symbol;Acc:HGNC:13241]	2.84992	-0.0742558	0.000299479	0.00212863
ENSGALG00000025798		chr1	73719066	73720392	+	protein_coding	Uncharacterized protein [Source:UniProtKB/TrEMBL;Acc:R4GJW3]	2.34534	-0.203854	0.00095093	0.00562969
ENSGALG00000014407	CASR	chr1	76166946	76245007	+	protein_coding	calcium-sensing receptor [Source:HGNC Symbol;Acc:HGNC:1514]	2.669	-0.0207268	0.00882477	0.0345424
ENSGALG00000013999	FBXO40	chr1	76342957	76354161	+	protein_coding	F-box protein 40 [Source:HGNC Symbol;Acc:HGNC:29816]	2.21014	-0.147542	0.0131659	0.0473094
ENSGALG00000027215		chr1	77640523	77641850	-	protein_coding	Uncharacterized protein [Source:UniProtKB/TrEMBL;Acc:R4GLC8]	2.21	-0.230999	0.00136452	0.00760414
ENSGALG00000014973	GPR156	chr1	79376821	79384556	+	protein_coding	G protein-coupled receptor 156 [Source:HGNC Symbol;Acc:HGNC:20844]	3.33379	0.0812583	0.000310595	0.00218885
ENSGALG00000014988	POPDC2	chr1	79597189	79606955	+	protein_coding	popeye domain-containing protein 2 [Source:RefSeq peptide;Acc:NP_996747]	4.5062	1.97132	0.00100135	0.00588902
ENSGALG00000015006	MAB21L3	chr1	79738380	79767515	-	protein_coding	mab-21-like 3 (C. elegans) [Source:HGNC Symbol;Acc:HGNC:26787]	2.20548	-0.233758	0.0024019	0.0120298
ENSGALG00000015079	UPK1B	chr1	80216650	80227498	-	protein_coding	uroplakin 1B [Source:HGNC Symbol;Acc:HGNC:12578]	7.70546	3.89712	1.62323e-07	3.0022e-06
ENSGALG00000019232	CFAP44	chr1	82632011	82677284	+	protein_coding	cilia and flagella associated protein 44 [Source:HGNC Symbol;Acc:HGNC:25631]	2.99646	2.375	0.00133256	0.00745813
ENSGALG00000015253	COL8A1	chr1	83661753	83748442	-	protein_coding	collagen, type VIII, alpha 1 [Source:HGNC Symbol;Acc:HGNC:2215]	2.44254	-0.0815706	0.0046711	0.0205482
ENSGALG00000015307	ABI3BP	chr1	84389704	84521596	-	protein_coding	ABI family, member 3 (NESH) binding protein [Source:HGNC Symbol;Acc:HGNC:17265]	4.2587	1.51872	0.00329583	0.0154835
ENSGALG00000015322	IMPG2	chr1	84610640	84660808	-	protein_coding	interphotoreceptor matrix proteoglycan 2 precursor [Source:RefSeq peptide;Acc:NP_001038104]	2.78178	-0.0893745	0.000429773	0.00286862
ENSGALG00000015346	NFKBIZ	chr1	84799655	84816004	+	protein_coding	NF-kappa-B inhibitor zeta [Source:RefSeq peptide;Acc:NP_001006254]	2.0942	3.12361	0.0108478	0.0405874
ENSGALG00000015347	ZPLD1	chr1	84961484	84992403	+	protein_coding	zona pellucida-like domain containing 1 [Source:HGNC Symbol;Acc:HGNC:27022]	5.36306	4.1456	0.0023432	0.0117701
ENSGALG00000015358	myosin	chr1	86879998	86923778	-	protein_coding	myosin heavy chain, cardiac muscle isoform [Source:RefSeq peptide;Acc:NP_990097]	2.57812	5.99953	0.00116256	0.00665409
ENSGALG00000015379	TAGLN3	chr1	87951757	87962695	+	protein_coding	transgelin 3 [Source:HGNC Symbol;Acc:HGNC:29868]	4.71454	5.22366	0.00201815	0.0103928
ENSGALG00000015395		chr1	88084658	88092055	+	protein_coding	Uncharacterized protein [Source:UniProtKB/TrEMBL;Acc:E1C4A0]	2.61404	-0.136205	0.00105254	0.00613936
ENSGALG00000015403	EPHA3	chr1	88543354	88765491	+	protein_coding	ephrin type-A receptor 3 precursor [Source:RefSeq peptide;Acc:NP_990761]	4.56286	3.1226	2.64423e-06	3.62856e-05
ENSGALG00000015440	RCSD1	chr1	90911605	90946738	-	protein_coding	capZ-interacting protein [Source:RefSeq peptide;Acc:NP_001025960]	5.06769	3.22028	9.01489e-06	0.00010621
ENSGALG00000015494	HTR1F	chr1	91933437	91934537	-	protein_coding	5-hydroxytryptamine (serotonin) receptor 1F, G protein-coupled [Source:HGNC Symbol;Acc:HGNC:5292]	2.48525	-0.168453	0.00104435	0.00609909
ENSGALG00000015737	NCAM2	chr1	100155276	100281469	+	protein_coding	neural cell adhesion molecule 2 [Source:HGNC Symbol;Acc:HGNC:7657]	3.65149	1.42973	0.00133341	0.00746
ENSGALG00000015888		chr1	104373632	104395666	+	protein_coding	Uncharacterized protein [Source:UniProtKB/TrEMBL;Acc:F1NXQ0]	3.41294	0.346581	0.00149873	0.00820129
ENSGALG00000016054	KCNJ6	chr1	106629205	106630185	-	protein_coding	potassium channel, inwardly rectifying subfamily J, member 6 [Source:HGNC Symbol;Acc:HGNC:6267]	3.41342	0.111936	0.000118495	0.000972821
ENSGALG00000016058	ERG	chr1	106944608	107008750	-	protein_coding	Transcriptional regulator Erg [Source:UniProtKB/Swiss-Prot;Acc:Q90837]	2.64928	3.55764	1.18795e-06	1.77743e-05
ENSGALG00000016132	IGSF5	chr1	107469994	107477780	+	protein_coding	immunoglobulin superfamily, member 5 [Source:HGNC Symbol;Acc:HGNC:5952]	2.70298	-0.115691	0.00116043	0.00664623
ENSGALG00000016169	TMPRSS3	chr1	108738273	108751340	-	protein_coding	transmembrane protease, serine 3 [Source:HGNC Symbol;Acc:HGNC:11877]	2.82818	-0.0771566	0.00108255	0.00628657
ENSGALG00000016173	UBASH3A	chr1	108752863	108771059	+	protein_coding	ubiquitin associated and SH3 domain containing A [Source:HGNC Symbol;Acc:HGNC:12462]	2.73655	-0.101853	0.00130531	0.00733737
ENSGALG00000016221	EFHC2	chr1	110382985	110442596	+	protein_coding	EF-hand domain-containing family member C2 [Source:RefSeq peptide;Acc:NP_001032918]	4.49723	0.60348	4.57929e-05	0.00043427
ENSGALG00000026370		chr1	112406171	112458249	-	protein_coding	Uncharacterized protein [Source:UniProtKB/TrEMBL;Acc:R4GGW7]	3.07811	-0.00251934	0.000545417	0.00351376
ENSGALG00000016269		chr1	112755759	112776808	+	protein_coding	Uncharacterized protein [Source:UniProtKB/TrEMBL;Acc:E1C6R3]	3.22754	0.409452	0.00214072	0.010894
ENSGALG00000019164		chr1	112906641	112985873	+	protein_coding	Uncharacterized protein [Source:UniProtKB/TrEMBL;Acc:F1NJ49]	3.07392	0.360458	0.00530444	0.0227992
ENSGALG00000016358	PTCHD1	chr1	117874036	117893768	-	protein_coding	patched domain containing 1 [Source:HGNC Symbol;Acc:HGNC:26392]	2.44004	4.38346	8.36889e-06	9.97544e-05
ENSGALG00000016375	PHEX	chr1	118329959	118421519	-	protein_coding	phosphate regulating endopeptidase homolog, X-linked [Source:RefSeq peptide;Acc:NP_001186206]	3.32537	0.82486	0.00668254	0.0275407
ENSGALG00000016511	ADGRG2	chr1	119811748	119834097	+	protein_coding	adhesion G protein-coupled receptor G2 [Source:HGNC Symbol;Acc:HGNC:4516]	3.70988	1.64987	0.00659858	0.0272514
ENSGALG00000016558	FIGF	chr1	121427181	121458777	+	protein_coding	vascular endothelial growth factor D precursor [Source:RefSeq peptide;Acc:NP_989899]	2.72961	5.60142	0.00118867	0.00678344
ENSGALG00000016569	FANCB	chr1	121725602	121741660	+	protein_coding	Fanconi anemia, complementation group B [Source:RefSeq peptide;Acc:NP_001186029]	2.45128	3.7776	0.000371978	0.00254501
ENSGALG00000016615	GPR143	chr1	124557329	124571165	+	protein_coding	G-protein coupled receptor 143 [Source:RefSeq peptide;Acc:NP_001264668]	3.11528	0.00458161	0.00055084	0.00353909
ENSGALG00000016635	MXRA5	chr1	127679910	127698770	+	protein_coding	matrix-remodelling associated 5 [Source:HGNC Symbol;Acc:HGNC:7539]	5.98119	4.30616	1.36814e-07	2.59146e-06
ENSGALG00000016750	VWA3B	chr1	131334588	131405083	-	protein_coding	von Willebrand factor A domain containing 3B [Source:HGNC Symbol;Acc:HGNC:28385]	3.09434	0.608626	0.00853581	0.0336239
ENSGALG00000016782	IL1R2	chr1	133109396	133119021	+	protein_coding	interleukin 1 receptor, type II [Source:HGNC Symbol;Acc:HGNC:5994]	2.60529	-0.152106	0.00137681	0.00765171
ENSGALG00000016786	IL18R1	chr1	133259701	133278851	+	protein_coding	interleukin-18 receptor 1 precursor [Source:RefSeq peptide;Acc:NP_001138697]	2.51955	-0.157257	0.00130758	0.00734722
ENSGALG00000016804	SLC5A7	chr1	135397400	135423764	+	protein_coding	high affinity choline transporter 1 [Source:RefSeq peptide;Acc:NP_001001763]	2.65799	-0.12223	0.00164142	0.00879292
ENSGALG00000016822	ATP4B	chr1	136636254	136641973	+	protein_coding	potassium-transporting ATPase subunit beta [Source:RefSeq peptide;Acc:NP_989749]	2.166	-0.237762	0.00207606	0.0106143
ENSGALG00000016826	ADPRHL1	chr1	136753731	136773443	+	protein_coding	ADP-ribosylhydrolase like 1 [Source:HGNC Symbol;Acc:HGNC:21303]	7.62675	3.00812	1.09475e-07	2.12159e-06
ENSGALG00000016841	COL4A1	chr1	138136838	138247249	-	protein_coding	collagen alpha-1(IV) chain precursor [Source:RefSeq peptide;Acc:NP_001155871]	2.32939	5.93606	3.89279e-10	1.12931e-08
ENSGALG00000016843	COL4A2	chr1	138247624	138387983	+	protein_coding	collagen, type IV, alpha 2 precursor [Source:RefSeq peptide;Acc:NP_001155862]	2.78188	5.17005	1.06301e-09	2.91183e-08
ENSGALG00000016867	ITGBL1	chr1	142614261	142752083	-	protein_coding	integrin, beta-like 1 (with EGF-like repeat domains) [Source:HGNC Symbol;Acc:HGNC:6164]	4.97802	0.988963	0.000108199	0.000901805
ENSGALG00000016906	SPRY2	chr1	151896142	151897919	+	protein_coding	protein sprouty homolog 2 [Source:RefSeq peptide;Acc:NP_990131]	2.65574	5.34828	1.01542e-17	9.83923e-16
ENSGALG00000027514	SCEL	chr1	153268787	153321083	-	protein_coding	sciellin [Source:HGNC Symbol;Acc:HGNC:10573]	4.86584	0.826573	4.945e-05	0.000465543
ENSGALG00000016907	KLHL1	chr1	156898969	157114305	+	protein_coding	kelch-like family member 1 [Source:HGNC Symbol;Acc:HGNC:6352]	3.35872	0.0935771	0.000220655	0.00164656
ENSGALG00000016934		chr1	161176976	161182699	+	protein_coding	Uncharacterized protein [Source:UniProtKB/TrEMBL;Acc:F1NY34]	3.23311	0.91987	0.0113126	0.0420175
ENSGALG00000017034	FKHR	chr1	169877052	169935660	+	protein_coding	Gallus gallus forkhead box O1 (FOXO1), mRNA. [Source:RefSeq mRNA;Acc:NM_204328]	3.18707	3.12665	3.87661e-05	0.000377949
ENSGALG00000017040		chr1	170575659	170618202	-	protein_coding	Uncharacterized protein [Source:UniProtKB/TrEMBL;Acc:F1P587]	2.68023	-0.120467	0.000549113	0.00353149
ENSGALG00000017041	FREM2	chr1	170636418	170751330	-	protein_coding	FRAS1 related extracellular matrix protein 2 [Source:HGNC Symbol;Acc:HGNC:25396]	5.68024	3.27724	1.91873e-08	4.2605e-07
ENSGALG00000026714	SHISA2	chr1	176294304	176296214	-	protein_coding	protein shisa-2 homolog precursor [Source:RefSeq peptide;Acc:NP_989832]	2.72324	4.85496	2.29692e-12	9.82502e-11
ENSGALG00000025748	Fgf9	chr1	177601063	177635306	-	protein_coding	glia-activating factor [Source:RefSeq peptide;Acc:NP_989730]	4.18625	1.10865	0.00124621	0.00705524
ENSGALG00000017136	GJB6	chr1	178193453	178195286	+	protein_coding	Gap junction beta-6 protein [Source:UniProtKB/Swiss-Prot;Acc:O93533]	4.57832	2.87006	0.000319778	0.00224601
ENSGALG00000022720		chr1	178210944	178217940	+	protein_coding	Gap junction protein [Source:UniProtKB/TrEMBL;Acc:E1C2J9]	2.35229	-0.0111915	0.00139571	0.00773559
ENSGALG00000017179	PDGFD	chr1	181229612	181286186	+	protein_coding	Gallus gallus platelet derived growth factor D (PDGFD), mRNA. [Source:RefSeq mRNA;Acc:NM_001277811]	2.86419	1.91049	0.00617358	0.0258257
ENSGALG00000017205	ENDOD1	chr1	184706330	184712962	-	protein_coding	endonuclease domain containing 1 [Source:HGNC Symbol;Acc:HGNC:29129]	3.1902	0.0271103	0.000341007	0.00236373
ENSGALG00000019054	NAALAD2	chr1	186813786	186845023	-	protein_coding	N-acetylated alpha-linked acidic dipeptidase 2 [Source:HGNC Symbol;Acc:HGNC:14526]	3.33688	0.249575	4.45616e-06	5.74941e-05
ENSGALG00000017238	GRM5	chr1	187158336	187407442	+	protein_coding	metabotropic glutamate receptor 5 precursor [Source:RefSeq peptide;Acc:NP_989469]	3.60123	0.187305	0.000294	0.00209921
ENSGALG00000017242	7	chr1	187935346	187939781	+	protein_coding	Frizzled-4 [Source:UniProtKB/Swiss-Prot;Acc:Q9IA05]	2.55453	3.68615	2.32357e-05	0.000241936
ENSGALG00000000818	LRRC32	chr1	192794857	192798682	+	protein_coding	leucine rich repeat containing 32 [Source:HGNC Symbol;Acc:HGNC:4161]	6.9518	2.40334	6.60241e-09	1.5994e-07
ENSGALG00000017333	LCMT2	chr1	193426028	193446131	-	protein_coding	leucine carboxyl methyltransferase 2 [Source:HGNC Symbol;Acc:HGNC:17558]	2.24267	6.81072	9.92089e-13	4.5148e-11
ENSGALG00000022702	CHRNA10	chr1	193907281	193910675	+	protein_coding	neuronal acetylcholine receptor subunit alpha-10 precursor [Source:RefSeq peptide;Acc:NP_001094506]	4.8622	0.819584	8.70707e-05	0.000751202
ENSGALG00000028960	NEU3	chr1	194924375	194927079	-	protein_coding	sialidase 3 (membrane sialidase) [Source:HGNC Symbol;Acc:HGNC:7760]	2.83071	1.37228	0.00425414	0.0190374
ENSGALG00000017310	XRRA1	chr1	194938172	194949182	+	protein_coding	X-ray radiation resistance associated 1 [Source:HGNC Symbol;Acc:HGNC:18868]	2.52941	-0.154933	0.00124988	0.00707322
ENSGALG00000023647	Gbx-1	chr2	173804	179883	+	protein_coding	Transcription factor Gbx-1 [Source:UniProtKB/TrEMBL;Acc:Q9DEB1]	2.95719	0.645778	1.53732e-07	2.8587e-06
ENSGALG00000027946	NOS3	chr2	309959	322560	-	protein_coding	nitric oxide synthase 3 (endothelial cell) [Source:HGNC Symbol;Acc:HGNC:7876]	2.04748	1.1772	3.83088e-10	1.11529e-08
ENSGALG00000028939	AOC1	chr2	337796	340851	-	protein_coding	amine oxidase, copper containing 1 [Source:HGNC Symbol;Acc:HGNC:80]	2.90914	-0.061254	0.000477421	0.00314833
ENSGALG00000005209	AQP1	chr2	1094833	1112902	+	protein_coding	aquaporin 1 (Colton blood group) [Source:RefSeq peptide;Acc:NP_001034542]	3.56731	3.65413	0.00241292	0.0120722
ENSGALG00000004754	OBSCN	chr2	2080439	2253956	-	protein_coding	obscurin, cytoskeletal calmodulin and titin-interacting RhoGEF [Source:HGNC Symbol;Acc:HGNC:15719]	4.80318	1.50733	0.00158047	0.00854027
ENSGALG00000025750		chr2	4773238	4774287	+	protein_coding	Uncharacterized protein [Source:UniProtKB/TrEMBL;Acc:R4GM06]	2.12776	0.137823	0.00166297	0.00888163
ENSGALG00000006575	VPAC2	chr2	9612723	9663652	-	protein_coding	vasoactive intestinal polypeptide receptor 2 precursor [Source:RefSeq peptide;Acc:NP_001014970]	2.76317	-0.0963789	0.000982342	0.00579159
ENSGALG00000007065	GJD4	chr2	12778766	12787894	-	protein_coding	gap junction protein, delta 4, 40.1kDa [Source:HGNC Symbol;Acc:HGNC:23296]	3.58044	0.382356	0.00169332	0.00903255
ENSGALG00000007140	NRP1	chr2	13816140	13922505	+	protein_coding	neuropilin-1 precursor [Source:RefSeq peptide;Acc:NP_990113]	2.49777	4.5351	0.000423781	0.0028313
ENSGALG00000007588	GAD2	chr2	16147743	16180423	-	protein_coding	glutamate decarboxylase 2 (pancreatic islets and brain, 65kDa) [Source:HGNC Symbol;Acc:HGNC:4093]	4.45943	0.806019	0.000239971	0.00176466
ENSGALG00000008629		chr2	19455261	19499773	-	protein_coding	Uncharacterized protein [Source:UniProtKB/TrEMBL;Acc:F1NLS1]	5.20257	1.03739	3.56153e-05	0.000349624
ENSGALG00000008671	ST8SIA6	chr2	19614633	19653024	+	protein_coding	alpha-2,8-sialyltransferase 8F [Source:RefSeq peptide;Acc:NP_001001603]	3.07198	1.50907	0.00103327	0.00605179
ENSGALG00000008997	STEAP4	chr2	20889645	20894978	-	protein_coding	STEAP family member 4 [Source:HGNC Symbol;Acc:HGNC:21923]	4.00913	0.359237	0.000177951	0.00137087
ENSGALG00000009004	ZNF804B	chr2	21054837	21268859	+	protein_coding	zinc finger protein 804B [Source:HGNC Symbol;Acc:HGNC:21958]	2.33751	-0.200256	0.000600537	0.00381196
ENSGALG00000009006		chr2	21523765	21533990	+	protein_coding	Uncharacterized protein [Source:UniProtKB/TrEMBL;Acc:E1BTZ9]	3.68695	2.05132	8.17935e-05	0.000713015
ENSGALG00000009482	HEPACAM2	chr2	23053747	23075529	-	protein_coding	HEPACAM family member 2 [Source:HGNC Symbol;Acc:HGNC:27364]	2.53027	-0.154981	0.00110002	0.00637263
ENSGALG00000009509		chr2	23188382	23325400	-	protein_coding		2.1552	-0.23778	0.0025541	0.0126629
ENSGALG00000023195	DLX6	chr2	24572105	24577130	+	protein_coding	distal-less homeobox 6 [Source:RefSeq peptide;Acc:NP_001074359]	7.12801	2.55913	4.74472e-12	1.9365e-10
ENSGALG00000009129	DLX5	chr2	24580154	24582822	-	protein_coding	Homeobox protein DLX-5 [Source:UniProtKB/Swiss-Prot;Acc:P50577]	4.05231	6.12213	4.51963e-19	5.54979e-17
ENSGALG00000010718	THSD7A	chr2	26394647	26589579	-	protein_coding	thrombospondin, type I, domain containing 7A [Source:HGNC Symbol;Acc:HGNC:22207]	4.94989	3.70857	1.49799e-05	0.000165663
ENSGALG00000010794	MEOX2	chr2	28171684	28225369	-	protein_coding	homeobox protein MOX-2 [Source:RefSeq peptide;Acc:NP_001005427]	3.7943	0.26618	0.000136708	0.00109397
ENSGALG00000019651	AGR3	chr2	28722114	28732817	-	protein_coding	anterior gradient protein 3 homolog precursor [Source:RefSeq peptide;Acc:NP_001186542]	3.07096	2.47371	0.01098	0.0410174
ENSGALG00000026059	TWIST1	chr2	29699892	29701106	-	protein_coding	twist family bHLH transcription factor 1 [Source:HGNC Symbol;Acc:HGNC:12428]	4.56326	1.93608	5.44866e-21	8.72031e-19
ENSGALG00000010868	MACC1	chr2	30032054	30066287	-	protein_coding	metastasis associated in colon cancer 1 [Source:HGNC Symbol;Acc:HGNC:30215]	7.65143	3.02864	3.81955e-07	6.50008e-06
ENSGALG00000010980	STK31	chr2	31470769	31506970	+	protein_coding	serine/threonine kinase 31 [Source:HGNC Symbol;Acc:HGNC:11407]	4.70234	0.716325	3.20225e-05	0.00031786
ENSGALG00000025982		chr2	31596365	31597513	-	protein_coding	Uncharacterized protein [Source:UniProtKB/TrEMBL;Acc:R4GLC2]	2.94612	1.12409	0.00610202	0.0255714
ENSGALG00000010983	NPY	chr2	31596875	31604784	+	protein_coding	Pro-neuropeptide Y Neuropeptide Y C-flanking peptide of NPY [Source:UniProtKB/Swiss-Prot;Acc:P28673]	3.32173	2.26631	0.00629134	0.0262259
ENSGALG00000026247	HOTAIRM1_2	chr2	32795929	32796148	+	misc_RNA	HOX antisense intergenic RNA myeloid 1 conserved region 2 [Source:RFAM;Acc:RF01976]	2.68569	0.152009	1.89029e-09	4.99542e-08
ENSGALG00000011145	TRIL	chr2	34036516	34038789	-	protein_coding	TLR4 interactor with leucine-rich repeats [Source:HGNC Symbol;Acc:HGNC:22200]	2.85701	4.26324	2.93143e-13	1.44984e-11
ENSGALG00000011170	WIPF3	chr2	34369172	34374862	+	protein_coding	WAS/WASL interacting protein family, member 3 [Source:HGNC Symbol;Acc:HGNC:22004]	2.39522	-0.188853	0.00021069	0.00158367
ENSGALG00000011241	RFTN1	chr2	34829807	34925176	-	protein_coding	raftlin [Source:RefSeq peptide;Acc:NP_989789]	2.58025	3.56842	0.000932148	0.00554153
ENSGALG00000011442	TGFBR2	chr2	40385525	40447574	+	protein_coding	TGF-beta receptor type-2 [Source:UniProtKB/Swiss-Prot;Acc:Q90999]	2.39122	3.17495	0.00308548	0.014756
ENSGALG00000011447	GADL1	chr2	40463088	40532241	-	protein_coding	glutamate decarboxylase-like 1 [Source:HGNC Symbol;Acc:HGNC:27949]	2.2568	-0.217273	0.00310505	0.0148169
ENSGALG00000011888	TGM4	chr2	43743131	43753642	-	protein_coding	protein-glutamine gamma-glutamyltransferase 4 [Source:RefSeq peptide;Acc:NP_001006368]	3.96074	0.339378	0.000280515	0.00202209
ENSGALG00000012151	TBX20	chr2	47818323	47850665	+	protein_coding	T-box transcription factor TBX20 [Source:UniProtKB/Swiss-Prot;Acc:Q8UW76]	3.31981	0.726437	0.0101536	0.0384749
ENSGALG00000012226	PPP1R17	chr2	49067176	49085386	-	protein_coding	protein phosphatase 1, regulatory subunit 17 [Source:HGNC Symbol;Acc:HGNC:16973]	4.19571	5.90092	5.56285e-07	9.09727e-06
ENSGALG00000012732	PHACTR1	chr2	62320937	62589197	-	protein_coding	phosphatase and actin regulator 1 [Source:RefSeq peptide;Acc:NP_989777]	2.36338	4.88681	1.00541e-06	1.54156e-05
ENSGALG00000012735	EDN1	chr2	62756871	62762088	-	protein_coding	endothelin 1 [Source:HGNC Symbol;Acc:HGNC:3176]	5.87819	4.03804	9.90966e-06	0.000115039
ENSGALG00000022976	OFCC1	chr2	63540510	63597084	+	protein_coding	orofacial cleft 1 candidate 1 [Source:HGNC Symbol;Acc:HGNC:21017]	2.66889	-0.120346	0.000885002	0.00532425
ENSGALG00000012790	DSP	chr2	64611442	64640267	-	protein_coding	desmoplakin [Source:HGNC Symbol;Acc:HGNC:3052]	2.39946	5.38851	0.000414929	0.00278523
ENSGALG00000028813	NRN1	chr2	65203624	65210310	+	protein_coding	neuritin precursor [Source:RefSeq peptide;Acc:NP_001185660]	4.21447	1.31571	8.63853e-06	0.000102199
ENSGALG00000012927	CDH10	chr2	72176697	72272302	+	protein_coding	cadherin-10 precursor [Source:RefSeq peptide;Acc:NP_999838]	5.84813	1.49794	2.6352e-06	3.61965e-05
ENSGALG00000013060	ADCY2	chr2	79220949	79424359	-	protein_coding	adenylate cyclase 2 (brain) [Source:HGNC Symbol;Acc:HGNC:233]	2.86745	3.40074	0.00434454	0.0193447
ENSGALG00000022909	PTPN3	chr2	84632425	84785709	-	protein_coding	protein tyrosine phosphatase, non-receptor type 3 [Source:HGNC Symbol;Acc:HGNC:9655]	2.14436	4.02255	0.00257197	0.0127205
ENSGALG00000013149	MOCOS	chr2	84812789	85025689	-	protein_coding	molybdenum cofactor sulfurase [Source:HGNC Symbol;Acc:HGNC:18234]	2.81668	2.07167	1.00394e-07	1.96971e-06
ENSGALG00000013748	CD226	chr2	93698470	93716328	+	protein_coding	CD226 molecule [Source:HGNC Symbol;Acc:HGNC:16961]	2.02581	-0.105571	0.0133803	0.0478868
ENSGALG00000027737	CIDEA	chr2	97144112	97156128	-	protein_coding	cell death activator CIDE-A [Source:RefSeq peptide;Acc:NP_001182052]	3.00362	4.71754	1.12698e-06	1.70231e-05
ENSGALG00000022875		chr2	97952712	97956997	-	protein_coding	Uncharacterized protein [Source:UniProtKB/TrEMBL;Acc:E1C107]	2.36779	-0.0529489	0.00340879	0.0159185
ENSGALG00000014847	MYOM1	chr2	100573569	100647380	+	protein_coding	myomesin-1 [Source:RefSeq peptide;Acc:NP_990290]	7.60375	2.98058	2.24515e-06	3.12915e-05
ENSGALG00000014858	ADCYAP1	chr2	101496505	101499219	-	protein_coding	adenylate cyclase activating polypeptide 1 (pituitary) [Source:HGNC Symbol;Acc:HGNC:241]	2.43581	2.16419	0.000134247	0.00107926
ENSGALG00000015735		chr2	101499227	101500118	-	protein_coding	Uncharacterized protein [Source:UniProtKB/TrEMBL;Acc:F1NDU1]	2.06442	0.150634	0.00181688	0.00955323
ENSGALG00000014938	ABHD3	chr2	102106447	102127328	-	protein_coding	abhydrolase domain containing 3 [Source:HGNC Symbol;Acc:HGNC:18718]	3.86653	0.294948	0.000210535	0.00158367
ENSGALG00000014976	GATA6	chr2	102302371	102315684	+	protein_coding	GATA binding protein 6 [Source:HGNC Symbol;Acc:HGNC:4174]	5.64627	1.9692	9.10803e-05	0.000779119
ENSGALG00000015034	ANKRD29	chr2	102746740	102769955	-	protein_coding	ankyrin repeat domain 29 [Source:HGNC Symbol;Acc:HGNC:27110]	2.67027	-0.121869	0.000760595	0.00465588
ENSGALG00000015056	LAMA3	chr2	102780728	102893609	+	protein_coding	laminin, alpha 3 [Source:HGNC Symbol;Acc:HGNC:6483]	3.53053	0.528736	0.00202225	0.0104102
ENSGALG00000019489	CHST9	chr2	104126305	104127381	-	protein_coding	carbohydrate (N-acetylgalactosamine 4-0) sulfotransferase 9 [Source:HGNC Symbol;Acc:HGNC:19898]	2.18708	3.22193	0.00593858	0.0249894
ENSGALG00000015140		chr2	105634159	105655438	-	protein_coding	Uncharacterized protein [Source:UniProtKB/TrEMBL;Acc:F1NJD7]	3.55228	3.88511	0.000569477	0.00364077
ENSGALG00000015254	ST18	chr2	109274972	109324045	-	protein_coding	suppression of tumorigenicity 18, zinc finger [Source:HGNC Symbol;Acc:HGNC:18695]	6.60637	2.10845	3.95069e-06	5.18029e-05
ENSGALG00000015404		chr2	110878688	110899609	-	protein_coding	Uncharacterized protein [Source:UniProtKB/TrEMBL;Acc:F1N8T5]	3.19902	1.54344	0.00939906	0.0362622
ENSGALG00000015520	TRIM55	chr2	114674302	114710966	+	protein_coding	tripartite motif-containing protein 55 [Source:RefSeq peptide;Acc:NP_001186333]	6.48101	1.99199	1.7236e-05	0.000187126
ENSGALG00000014185	ADHFE1	chr2	114787387	114799160	+	protein_coding	alcohol dehydrogenase, iron containing, 1 [Source:HGNC Symbol;Acc:HGNC:16354]	2.6757	3.11892	0.00377159	0.017263
ENSGALG00000015622	EYA1	chr2	116629419	116718405	-	protein_coding	EYA transcriptional coactivator and phosphatase 1 [Source:HGNC Symbol;Acc:HGNC:3519]	2.56244	6.05969	9.44237e-09	2.21577e-07
ENSGALG00000019470	MSC	chr2	116915841	116918080	-	protein_coding	musculin [Source:HGNC Symbol;Acc:HGNC:7321]	5.64498	4.04488	1.77956e-06	2.55525e-05
ENSGALG00000015914	CALB1	chr2	124187670	124207058	-	protein_coding	Calbindin [Source:UniProtKB/Swiss-Prot;Acc:P04354]	3.7673	0.253359	0.000160791	0.00125565
ENSGALG00000015926	RUNX1T1	chr2	124823184	124932746	-	protein_coding	protein CBFA2T1 [Source:RefSeq peptide;Acc:NP_990075]	2.13826	2.76813	0.0134082	0.0479623
ENSGALG00000022788	NIPAL2	chr2	127319287	127366379	-	protein_coding	NIPA-like domain containing 2 [Source:HGNC Symbol;Acc:HGNC:25854]	3.67315	0.212316	0.000126739	0.00103276
ENSGALG00000014208	GRHL2	chr2	128591603	128652059	+	protein_coding	grainyhead-like 2 (Drosophila) [Source:HGNC Symbol;Acc:HGNC:2799]	2.80468	1.71565	0.0115195	0.042586
ENSGALG00000016111	CSMD3	chr2	132812344	133381395	-	protein_coding	CUB and Sushi multiple domains 3 [Source:HGNC Symbol;Acc:HGNC:19291]	2.96451	1.98422	4.60749e-09	1.13545e-07
ENSGALG00000016393		chr2	136958880	137037748	+	protein_coding	Uncharacterized protein [Source:UniProtKB/TrEMBL;Acc:F1NN15]	2.68206	0.348564	0.00803482	0.0319419
ENSGALG00000028745		chr2	144397138	144414593	-	protein_coding	Uncharacterized protein [Source:UniProtKB/TrEMBL;Acc:R4GIH0]	2.3954	-0.190543	0.00185878	0.00971256
ENSGALG00000016163	GPR20	chr2	145753410	145778152	-	protein_coding	G protein-coupled receptor 20 [Source:HGNC Symbol;Acc:HGNC:4475]	2.8198	-0.0110805	0.0050298	0.0218495
ENSGALG00000008359	CD93	chr3	3258573	3260939	+	protein_coding	complement component C1q receptor precursor [Source:RefSeq peptide;Acc:NP_001186380]	5.63054	1.33593	3.30751e-06	4.43618e-05
ENSGALG00000028576	PAX1	chr3	3418572	3422402	-	protein_coding	paired box 1 [Source:HGNC Symbol;Acc:HGNC:8615]	5.55807	1.5199	2.84764e-05	0.000288285
ENSGALG00000008732	OTOR	chr3	5580123	5585119	+	protein_coding	Otoraplin [Source:UniProtKB/Swiss-Prot;Acc:Q9I8P6]	3.2284	1.51859	0.000158237	0.00123978
ENSGALG00000028579		chr3	9585397	9586257	-	protein_coding	Uncharacterized protein [Source:UniProtKB/TrEMBL;Acc:R4GH70]	3.30567	0.0702234	4.70676e-05	0.000444583
ENSGALG00000009042	ISM1	chr3	12067879	12108397	-	protein_coding	isthmin 1, angiogenesis inhibitor [Source:HGNC Symbol;Acc:HGNC:16213]	4.84193	1.26136	0.000904755	0.00541
ENSGALG00000009037	SPTLC3	chr3	12135230	12217452	-	protein_coding	serine palmitoyltransferase, long chain base subunit 3 [Source:HGNC Symbol;Acc:HGNC:16253]	4.03292	0.371267	6.01422e-05	0.000550203
ENSGALG00000026351		chr3	12843173	12844879	-	protein_coding	Uncharacterized protein [Source:UniProtKB/TrEMBL;Acc:R4GKT3]	2.6787	3.70676	2.55037e-12	1.08117e-10
ENSGALG00000008830	BMP2	chr3	14447219	14450083	-	protein_coding	bone morphogenetic protein 2 precursor [Source:RefSeq peptide;Acc:NP_989689]	2.61462	2.11323	0.0047696	0.0209169
ENSGALG00000008552	MAL	chr3	15440021	15443931	+	protein_coding	myelin and lymphocyte protein [Source:RefSeq peptide;Acc:NP_001186320]	3.72095	0.223791	0.000104475	0.00087589
ENSGALG00000008544	NCX1	chr3	15666219	15743112	+	protein_coding	sodium/calcium exchanger 1 precursor [Source:RefSeq peptide;Acc:NP_001072941]	3.21757	0.495134	0.00684879	0.0280489
ENSGALG00000009155	CHGB	chr3	16172663	16238767	+	protein_coding	chromogranin B [Source:HGNC Symbol;Acc:HGNC:1930]	2.05583	4.67418	0.00102368	0.00600548
ENSGALG00000027018		chr3	16432972	16434045	+	protein_coding	Uncharacterized protein [Source:UniProtKB/TrEMBL;Acc:R4GFZ5]	3.06232	-0.0133937	0.000310717	0.00218885
ENSGALG00000009388	SUSD4	chr3	17136650	17173601	+	protein_coding	sushi domain containing 4 [Source:HGNC Symbol;Acc:HGNC:25470]	3.5421	0.143158	0.000238267	0.00175559
ENSGALG00000027554	HLX	chr3	17936724	17938913	-	protein_coding	H2.0-like homeobox [Source:HGNC Symbol;Acc:HGNC:4978]	5.69514	1.38498	1.23994e-11	4.62347e-10
ENSGALG00000009877	KCNH1	chr3	21679620	21839004	+	protein_coding	potassium channel, voltage gated eag related subfamily H, member 1 [Source:HGNC Symbol;Acc:HGNC:6250]	3.61927	0.175435	0.000303898	0.00214932
ENSGALG00000023303	Six2	chr3	25240527	25243491	-	protein_coding	homeobox protein SIX2 [Source:RefSeq peptide;Acc:NP_001038160]	2.12044	0.0201376	0.000707427	0.00436783
ENSGALG00000010057	KIF6	chr3	28295093	28437362	+	protein_coding	kinesin family member 6 [Source:HGNC Symbol;Acc:HGNC:21202]	2.17596	-0.0158006	0.00139234	0.00771991
ENSGALG00000010303		chr3	30203971	30214506	+	protein_coding	Uncharacterized protein [Source:UniProtKB/TrEMBL;Acc:E1C7F4]	3.02332	2.40173	0.00487196	0.0212872
ENSGALG00000010435	RASGRP3	chr3	30420675	30444025	-	protein_coding	ras guanyl-releasing protein 3 [Source:RefSeq peptide;Acc:NP_001006401]	3.45845	4.58982	4.80959e-05	0.000453694
ENSGALG00000010635		chr3	33173349	33182377	+	protein_coding	Uncharacterized protein [Source:UniProtKB/TrEMBL;Acc:E1C693]	2.28926	-0.215056	0.00192082	0.00998182
ENSGALG00000010664	KIF26B	chr3	33669293	33956337	-	protein_coding	kinesin family member 26B [Source:HGNC Symbol;Acc:HGNC:25484]	3.09969	4.83319	1.14262e-07	2.20534e-06
ENSGALG00000010773	GREM2	chr3	35493725	35533009	+	protein_coding	gremlin 2, DAN family BMP antagonist [Source:HGNC Symbol;Acc:HGNC:17655]	4.41382	0.559558	5.63924e-06	7.07712e-05
ENSGALG00000010778	CHRM3	chr3	35727538	35877494	-	protein_coding	muscarinic acetylcholine receptor M3 [Source:RefSeq peptide;Acc:NP_990730]	5.06313	1.4822	1.62634e-05	0.000178059
ENSGALG00000011205	SMOC2	chr3	40939403	41033678	-	protein_coding	SPARC related modular calcium binding 2 [Source:HGNC Symbol;Acc:HGNC:20323]	2.3444	6.00233	2.95601e-07	5.15998e-06
ENSGALG00000011489	T	chr3	42233586	42241528	+	protein_coding	brachyury protein [Source:RefSeq peptide;Acc:NP_990271]	4.35049	1.27147	8.86219e-05	0.000761817
ENSGALG00000013603	MYCT1	chr3	48758839	48759372	+	protein_coding	myc target 1 [Source:HGNC Symbol;Acc:HGNC:23172]	2.8839	-0.0640206	0.000968989	0.00572324
ENSGALG00000013742	EZR	chr3	51391093	51427199	-	protein_coding	ezrin [Source:RefSeq peptide;Acc:NP_990216]	2.4105	7.28324	8.32794e-05	0.000723531
ENSGALG00000013747	TAGAP	chr3	51494688	51502392	+	protein_coding	T-cell activation RhoGTPase activating protein [Source:HGNC Symbol;Acc:HGNC:15669]	5.52901	1.25683	1.61485e-05	0.000176938
ENSGALG00000027536	PERP	chr3	53805127	53822823	+	protein_coding	PERP, TP53 apoptosis effector [Source:RefSeq peptide;Acc:NP_001264632]	3.49972	2.61703	0.00247942	0.0123529
ENSGALG00000029024	TCF21	chr3	55546608	55552571	-	protein_coding	transcription factor 21 [Source:RefSeq peptide;Acc:NP_001264640]	4.71513	1.37671	0.000218024	0.00162934
ENSGALG00000013987	EYA4	chr3	55666849	55823894	-	protein_coding	EYA transcriptional coactivator and phosphatase 4 [Source:HGNC Symbol;Acc:HGNC:3522]	2.65789	2.88403	0.000266684	0.00193975
ENSGALG00000002869	ENPP3	chr3	56723839	56757736	-	protein_coding	ectonucleotide pyrophosphatase/phosphodiesterase 3 [Source:HGNC Symbol;Acc:HGNC:3358]	3.90133	1.29225	0.00559727	0.0238206
ENSGALG00000014783	PTPRK	chr3	58029862	58422557	+	protein_coding	protein tyrosine phosphatase, receptor type, K [Source:HGNC Symbol;Acc:HGNC:9674]	2.32061	4.22329	3.23371e-07	5.59671e-06
ENSGALG00000014823	C6orf58	chr3	58527005	58539770	-	protein_coding	chromosome 6 open reading frame 58 [Source:HGNC Symbol;Acc:HGNC:20960]	2.67256	-0.122271	0.00174641	0.0092682
ENSGALG00000027036	PKIB	chr3	60687661	60743857	-	protein_coding	protein kinase (cAMP-dependent, catalytic) inhibitor beta [Source:HGNC Symbol;Acc:HGNC:9018]	3.77897	0.387466	0.000378911	0.00258116
ENSGALG00000014913	ROS1	chr3	62908210	62980553	+	protein_coding	proto-oncogene tyrosine-protein kinase ROS precursor [Source:RefSeq peptide;Acc:NP_990588]	3.85017	0.282002	0.000327566	0.00229167
ENSGALG00000014917	VGLL2	chr3	62989673	62997520	-	protein_coding	transcription cofactor vestigial-like protein 2 [Source:RefSeq peptide;Acc:NP_001139462]	7.62067	2.99986	5.44841e-08	1.1313e-06
ENSGALG00000019941	FAM162B	chr3	63183804	63186450	+	protein_coding	family with sequence similarity 162, member B [Source:HGNC Symbol;Acc:HGNC:21549]	2.68332	-0.121544	0.000540131	0.00348443
ENSGALG00000026594	HS3ST5	chr3	64050590	64195525	+	protein_coding	heparan sulfate (glucosamine) 3-O-sulfotransferase 5 [Source:HGNC Symbol;Acc:HGNC:19419]	5.6317	1.33715	2.76802e-05	0.00028116
ENSGALG00000015001	LAMA4	chr3	65122174	65221853	+	protein_coding	laminin, alpha 4 [Source:HGNC Symbol;Acc:HGNC:6484]	2.5338	4.77131	0.0040594	0.0182637
ENSGALG00000027420	POPDC3	chr3	68255196	68259535	+	protein_coding	Popeye domain-containing protein 3 [Source:UniProtKB/Swiss-Prot;Acc:Q9DG25]	4.58138	1.79651	0.00088225	0.00531365
ENSGALG00000015410	BVES	chr3	68268129	68295765	+	protein_coding	Blood vessel epicardial substance [Source:UniProtKB/Swiss-Prot;Acc:Q9DG23]	5.42034	1.18482	5.06853e-06	6.475e-05
ENSGALG00000015466	SIM1	chr3	70369050	70409288	+	protein_coding	single-minded family bHLH transcription factor 1 [Source:HGNC Symbol;Acc:HGNC:10882]	2.99351	-0.0317923	0.000551485	0.00354004
ENSGALG00000015605	BACH2	chr3	74768582	74811042	+	protein_coding	BTB and CNC homology 1, basic leucine zipper transcription factor 2 [Source:HGNC Symbol;Acc:HGNC:14078]	2.43503	1.77226	0.00178723	0.00942864
ENSGALG00000015834	TBX18	chr3	76646414	76672046	+	protein_coding	Gallus gallus T-box 18 (TBX18), mRNA. [Source:RefSeq mRNA;Acc:NM_204453]	4.11054	0.817708	0.000364728	0.00250791
ENSGALG00000015877	SH3BGRL2	chr3	78756279	78772633	-	protein_coding	SH3 domain binding glutamate-rich protein like 2 [Source:HGNC Symbol;Acc:HGNC:15567]	2.78221	0.744865	0.000368227	0.00252407
ENSGALG00000015897	IMPG1	chr3	79802794	79856460	+	protein_coding	Interphotoreceptor matrix proteoglycan 1 [Source:UniProtKB/Swiss-Prot;Acc:Q8JIR8]	2.52369	-0.161175	0.000773369	0.00472581
ENSGALG00000016309	KLHL31	chr3	87554346	87560990	+	protein_coding	kelch-like family member 31 [Source:HGNC Symbol;Acc:HGNC:21353]	4.31242	0.495953	0.000137678	0.00109988
ENSGALG00000016324	GSTA3	chr3	87785842	87793876	+	protein_coding	glutathione S-transferase alpha 3 [Source:RefSeq peptide;Acc:NP_990149]	3.00488	1.74988	0.00971615	0.037137
ENSGALG00000016352	DLGAP2	chr3	90624220	91037359	-	protein_coding	discs, large (Drosophila) homolog-associated protein 2 [Source:HGNC Symbol;Acc:HGNC:2906]	2.97335	0.307233	0.00301767	0.014551
ENSGALG00000016400	RSAD2	chr3	94589239	94594293	+	protein_coding	Uncharacterized protein [Source:UniProtKB/TrEMBL;Acc:F1NLJ6]	3.37754	0.0991684	0.000497652	0.0032636
ENSGALG00000016448	KCNF1	chr3	96578938	96581015	+	protein_coding	potassium channel, voltage gated modifier subfamily F, member 1 [Source:HGNC Symbol;Acc:HGNC:6246]	4.36221	0.539232	4.94037e-05	0.000465414
ENSGALG00000016470	KCNS3	chr3	99922984	99942855	+	protein_coding	potassium voltage-gated channel, modifier subfamily S, member 3 [Source:HGNC Symbol;Acc:HGNC:6302]	7.13252	2.56276	1.54282e-09	4.1386e-08
ENSGALG00000016473	OSR1	chr3	100695798	100697672	-	protein_coding	protein odd-skipped-related 1 [Source:RefSeq peptide;Acc:NP_001162180]	3.28465	0.0676162	7.02581e-05	0.000630597
ENSGALG00000016556		chr3	104625524	104632845	-	protein_coding	Uncharacterized protein [Source:UniProtKB/TrEMBL;Acc:F1NHR3]	2.00019	-0.266888	0.00487354	0.0212876
ENSGALG00000025971	KCNK3	chr3	104844800	104855646	-	protein_coding	TASK-1 potassium channel [Source:UniProtKB/TrEMBL;Acc:Q2XP57]	3.28948	0.605541	0.000235712	0.00174053
ENSGALG00000016577	OTOF	chr3	104893481	104964667	+	protein_coding	otoferlin [Source:HGNC Symbol;Acc:HGNC:8515]	2.59123	-0.139987	0.00127195	0.00717532
ENSGALG00000016662	GATA4	chr3	106954748	106976693	+	protein_coding	GATA binding protein 4 [Source:HGNC Symbol;Acc:HGNC:4173]	2.67326	-0.125803	0.00102972	0.00603345
ENSGALG00000016723		chr3	109693698	109698484	+	protein_coding	Uncharacterized protein [Source:UniProtKB/TrEMBL;Acc:F1NEY4]	2.5388	-0.153415	0.00132533	0.00742644
ENSGALG00000024095		chr4	859228	861210	-	protein_coding	Uncharacterized protein [Source:UniProtKB/TrEMBL;Acc:E1C6F4]	2.40493	-0.185888	0.000202445	0.00153058
ENSGALG00000003841		chr4	1816321	1827815	-	protein_coding		3.19811	0.80597	0.00785215	0.0313338
ENSGALG00000005638	IL2RG	chr4	2367919	2370689	+	protein_coding	interleukin 2 receptor, gamma [Source:HGNC Symbol;Acc:HGNC:6010]	2.4246	-0.180332	0.0016204	0.00871969
ENSGALG00000005648		chr4	2374308	2377289	+	protein_coding	Uncharacterized protein [Source:UniProtKB/TrEMBL;Acc:F1NGI3]	2.81855	0.754277	0.00551045	0.0235284
ENSGALG00000005936	AGTR2	chr4	2989458	2990579	+	protein_coding	angiotensin II receptor, type 2 [Source:HGNC Symbol;Acc:HGNC:338]	6.20385	1.77718	1.56404e-06	2.27097e-05
ENSGALG00000006087	GPC3	chr4	3824471	3937271	-	protein_coding	glypican 3 [Source:HGNC Symbol;Acc:HGNC:4451]	3.24173	5.91259	0.000220893	0.00164733
ENSGALG00000006412	VGLL1	chr4	4328298	4331251	+	protein_coding	vestigial-like family member 1 [Source:HGNC Symbol;Acc:HGNC:20985]	4.65537	0.693402	9.1127e-05	0.000779119
ENSGALG00000006821	TNMD	chr4	5164394	5172188	-	protein_coding	tenomodulin [Source:RefSeq peptide;Acc:NP_996868]	3.88347	0.298165	5.16527e-05	0.000483087
ENSGALG00000006822	Pcdh19	chr4	5187964	5236035	+	protein_coding	protocadherin-19 precursor [Source:RefSeq peptide;Acc:NP_001092077]	3.15172	3.2549	6.02941e-06	7.47457e-05
ENSGALG00000006877	KLHL4	chr4	8058003	8091302	-	protein_coding	kelch-like family member 4 [Source:HGNC Symbol;Acc:HGNC:6355]	6.74522	2.34449	3.15199e-05	0.000313745
ENSGALG00000020292	GABRE	chr4	10807767	10840783	+	protein_coding	Gamma-aminobutyric acid receptor subunit gamma-4 [Source:UniProtKB/Swiss-Prot;Acc:P34904]	4.58927	0.663063	8.47206e-05	0.000734933
ENSGALG00000007282	CNGA2	chr4	10889950	10892483	-	protein_coding	cyclic nucleotide gated channel alpha 2 [Source:HGNC Symbol;Acc:HGNC:2149]	3.76946	0.254376	0.00015841	0.00123978
ENSGALG00000027977	PRRG3	chr4	10906727	10913244	-	protein_coding	proline rich Gla (G-carboxyglutamic acid) 3 (transmembrane) [Source:HGNC Symbol;Acc:HGNC:30798]	2.45934	3.42658	1.04357e-11	3.95337e-10
ENSGALG00000007466	EDNRB2	chr4	11117414	11126899	+	protein_coding	endothelin receptor B subtype 2 precursor [Source:RefSeq peptide;Acc:NP_989451]	3.22635	0.0456492	0.00038957	0.00264365
ENSGALG00000007526		chr4	11253797	11258428	-	protein_coding	Uncharacterized protein [Source:UniProtKB/TrEMBL;Acc:E1C2F4]	3.54494	3.07527	0.00908512	0.0352996
ENSGALG00000007546		chr4	11303685	11326754	-	protein_coding	Uncharacterized protein [Source:UniProtKB/TrEMBL;Acc:E1BR53]	2.32346	-0.236363	0.00344193	0.0160166
ENSGALG00000007570		chr4	11396597	11408463	-	protein_coding	Uncharacterized protein [Source:UniProtKB/TrEMBL;Acc:E1BZV5]	2.96367	2.69592	0.00540473	0.0231534
ENSGALG00000007594	ASB12	chr4	11612707	11617276	+	protein_coding	ankyrin repeat and SOCS box protein 12 [Source:RefSeq peptide;Acc:NP_001264599]	5.75562	1.41887	1.89604e-05	0.000202757
ENSGALG00000007599	AMER1	chr4	11626001	11629405	+	protein_coding	APC membrane recruitment protein 1 [Source:HGNC Symbol;Acc:HGNC:26837]	2.05548	3.10346	0.00964944	0.0369614
ENSGALG00000007657	CDXB	chr4	12065414	12074015	+	protein_coding	caudal type homeobox 4 [Source:RefSeq peptide;Acc:NP_989945]	2.49533	-0.165659	7.53619e-05	0.000670313
ENSGALG00000008326		chr4	14122936	14147078	+	protein_coding	Uncharacterized protein [Source:UniProtKB/TrEMBL;Acc:F1P0X9]	3.01485	-0.0247206	0.000682478	0.00423582
ENSGALG00000008856		chr4	16601371	16634073	+	protein_coding	Uncharacterized protein [Source:UniProtKB/TrEMBL;Acc:F1NNR0]	2.09741	3.91982	0.000635029	0.00398474
ENSGALG00000009865	RNF150	chr4	29246319	29359420	-	protein_coding	ring finger protein 150 [Source:HGNC Symbol;Acc:HGNC:23138]	4.33732	0.671898	2.55501e-06	3.54023e-05
ENSGALG00000009880	INPP4B	chr4	29544234	29718460	-	protein_coding	inositol polyphosphate-4-phosphatase, type II, 105kDa [Source:HGNC Symbol;Acc:HGNC:6075]	2.0078	3.64971	0.0123719	0.0449668
ENSGALG00000020233		chr4	30093526	30095103	+	protein_coding	Uncharacterized protein [Source:UniProtKB/TrEMBL;Acc:E1C4F7]	2.62969	-0.133264	0.000507167	0.00330925
ENSGALG00000010071	MAB21L2	chr4	32453927	32455006	+	protein_coding	mab-21-like 2 [Source:RefSeq peptide;Acc:NP_989521]	4.10234	1.99375	1.56951e-08	3.54295e-07
ENSGALG00000010122	SH2D4A	chr4	33513178	33525476	+	protein_coding	SH2 domain containing 4A [Source:HGNC Symbol;Acc:HGNC:26102]	4.8007	0.783576	1.15601e-06	1.73693e-05
ENSGALG00000010268	PARM1	chr4	34053977	34056448	-	protein_coding	prostate androgen-regulated mucin-like protein 1 [Source:HGNC Symbol;Acc:HGNC:24536]	4.06184	1.24774	0.000340015	0.00236022
ENSGALG00000010521	COL25A1	chr4	36799079	37092841	+	protein_coding	collagen, type XXV, alpha 1 [Source:HGNC Symbol;Acc:HGNC:18603]	2.97512	4.07424	1.19006e-06	1.77872e-05
ENSGALG00000010596	TACR3	chr4	38618456	38652708	+	protein_coding	tachykinin receptor 3 [Source:HGNC Symbol;Acc:HGNC:11528]	2.36754	-0.193019	0.00185876	0.00971256
ENSGALG00000010815	WDR17	chr4	43727567	43765630	+	protein_coding	WD repeat domain 17 [Source:HGNC Symbol;Acc:HGNC:16661]	4.38691	0.541429	0.000146302	0.00116225
ENSGALG00000026560	PRDM8	chr4	44734247	44737047	+	protein_coding	PR domain containing 8 [Source:HGNC Symbol;Acc:HGNC:13993]	2.85456	-0.0735516	0.00018253	0.00140009
ENSGALG00000011339	IGFBP7	chr4	48581286	48595158	+	protein_coding	insulin-like growth factor binding protein 7 [Source:HGNC Symbol;Acc:HGNC:5476]	2.83675	4.91813	8.38349e-27	3.06191e-24
ENSGALG00000011612	GC	chr4	49817085	49822899	-	protein_coding	vitamin D-binding protein precursor [Source:RefSeq peptide;Acc:NP_990213]	2.66985	-0.121841	0.00112854	0.00649757
ENSGALG00000011616	NPFFR2	chr4	49832925	49847032	+	protein_coding	neuropeptide FF receptor 2 [Source:RefSeq peptide;Acc:NP_001029997]	4.02118	0.364699	0.000127567	0.00103713
ENSGALG00000011658		chr4	50277990	50289526	+	protein_coding	Alpha-fetoprotein [Source:UniProtKB/TrEMBL;Acc:E1BV96]	3.78256	0.257616	5.27995e-06	6.72096e-05
ENSGALG00000011664	RASSF6	chr4	50293965	50313187	-	protein_coding	Ras association (RalGDS/AF-6) domain family member 6 [Source:HGNC Symbol;Acc:HGNC:20796]	7.03447	2.478	3.77109e-09	9.44031e-08
ENSGALG00000011680	EPHA5	chr4	50470435	50669744	-	protein_coding	ephrin type-A receptor 5 precursor [Source:RefSeq peptide;Acc:NP_990436]	2.82622	4.43611	0.000334119	0.00232717
ENSGALG00000011962	NDNF	chr4	53606932	53623955	+	protein_coding	neuron-derived neurotrophic factor [Source:HGNC Symbol;Acc:HGNC:26256]	3.14461	3.08311	0.00509674	0.0220635
ENSGALG00000012018	CGT	chr4	55856553	55899875	-	protein_coding	2-hydroxyacylsphingosine 1-beta-galactosyltransferase precursor [Source:RefSeq peptide;Acc:NP_989535]	3.93465	2.29194	0.00275281	0.0134561
ENSGALG00000026627	LRIT3	chr4	57694998	57708362	-	protein_coding	leucine-rich repeat, immunoglobulin-like and transmembrane domains 3 [Source:HGNC Symbol;Acc:HGNC:24783]	2.51237	-0.165381	0.0014043	0.00777715
ENSGALG00000012278	EMCN	chr4	59791983	59835703	-	protein_coding	endomucin [Source:HGNC Symbol;Acc:HGNC:16041]	3.32723	3.70383	0.00694684	0.0284015
ENSGALG00000013663	FGF20	chr4	62875510	62879757	+	protein_coding	fibroblast growth factor 20 [Source:HGNC Symbol;Acc:HGNC:3677]	2.74405	-0.101377	0.000929317	0.00552761
ENSGALG00000013907	KDR	chr4	64794087	64824189	+	protein_coding	vascular endothelial growth factor receptor 2 precursor [Source:RefSeq peptide;Acc:NP_001004368]	3.29058	4.70584	0.0106663	0.040066
ENSGALG00000014144	CORIN	chr4	66262035	66367775	+	protein_coding	corin, serine peptidase [Source:HGNC Symbol;Acc:HGNC:19012]	3.55728	0.16364	0.000302016	0.00214026
ENSGALG00000014192	ATP10D	chr4	66374739	66404130	-	protein_coding	ATPase, class V, type 10D [Source:HGNC Symbol;Acc:HGNC:13549]	2.3346	3.84978	0.00596815	0.0250842
ENSGALG00000014250	phox2b	chr4	68048132	68050245	+	protein_coding	Uncharacterized protein [Source:UniProtKB/TrEMBL;Acc:F1NMR6]	2.46982	-0.170818	0.000504244	0.00329319
ENSGALG00000014267	RBM47	chr4	68541428	68547721	+	protein_coding	RNA binding motif protein 47 [Source:HGNC Symbol;Acc:HGNC:30358]	3.77799	0.257058	8.92284e-05	0.000766105
ENSGALG00000027093	TLR1LB	chr4	69117413	69122553	+	protein_coding	toll-like receptor 6 [Source:RefSeq peptide;Acc:NP_001075178]	3.20117	1.3793	0.00134187	0.00749847
ENSGALG00000017485	TLR1LA	chr4	69131053	69133509	+	protein_coding	toll-like receptor1 precursor [Source:RefSeq peptide;Acc:NP_001007489]	3.609	0.185679	0.000141562	0.00112712
ENSGALG00000014398	PPARGC1A	chr4	73626292	73691855	+	protein_coding	peroxisome proliferator-activated receptor gamma coactivator 1-alpha [Source:RefSeq peptide;Acc:NP_001006457]	7.31572	2.72688	5.56846e-10	1.57064e-08
ENSGALG00000014987	OTOP1	chr4	78082184	78095668	-	protein_coding	otopetrin 1 [Source:HGNC Symbol;Acc:HGNC:19656]	4.01268	0.36743	0.000226745	0.00168129
ENSGALG00000015559	ABLIM2	chr4	80230321	80370428	-	protein_coding	actin binding LIM protein family, member 2 [Source:HGNC Symbol;Acc:HGNC:19195]	3.78414	0.73082	1.25085e-05	0.00014107
ENSGALG00000015568	SH3TC1	chr4	80381670	80409920	+	protein_coding	SH3 domain and tetratricopeptide repeats 1 [Source:HGNC Symbol;Acc:HGNC:26009]	5.52349	1.26027	6.16726e-05	0.000562037
ENSGALG00000015575	HTRA3	chr4	80438630	80461899	+	protein_coding	HtrA serine peptidase 3 [Source:HGNC Symbol;Acc:HGNC:30406]	4.20092	0.455049	4.62637e-05	0.00043757
ENSGALG00000015597	CPZ	chr4	80746268	80784359	+	protein_coding	carboxypeptidase Z precursor [Source:RefSeq peptide;Acc:NP_989909]	2.13037	5.91239	5.05469e-05	0.000474372
ENSGALG00000015599	SOHO-1	chr4	80966340	80969431	-	protein_coding	sensory organ homeobox protein SOHo [Source:RefSeq peptide;Acc:NP_990717]	5.12195	4.15331	1.56573e-05	0.000172352
ENSGALG00000015600	HMX1	chr4	80975027	80978215	-	protein_coding	Homeobox protein HMX1 [Source:UniProtKB/Swiss-Prot;Acc:Q9DE09]	2.63385	-0.0930167	0.0001658	0.00128982
ENSGALG00000015623	HGFAC	chr4	81495986	81536120	-	protein_coding	HGF activator [Source:HGNC Symbol;Acc:HGNC:4894]	2.75258	-0.102187	0.00104701	0.00611214
ENSGALG00000015685	CFAP99	chr4	82161953	82209841	-	protein_coding	cilia and flagella associated protein 99 [Source:HGNC Symbol;Acc:HGNC:51180]	2.24712	1.78431	0.0130842	0.0470753
ENSGALG00000015935	SMYD1	chr4	85479636	85501396	+	protein_coding	SET and MYND domain-containing protein 1 [Source:RefSeq peptide;Acc:NP_989486]	7.90086	3.2574	6.14314e-06	7.59623e-05
ENSGALG00000022935	FOXI3	chr4	85595844	85600029	-	protein_coding	forkhead box I3 [Source:HGNC Symbol;Acc:HGNC:35123]	5.12984	1.49735	1.41792e-05	0.000157297
ENSGALG00000020108		chr4	85618178	85625770	+	protein_coding	Uncharacterized protein [Source:UniProtKB/TrEMBL;Acc:E1C0D9]	2.97204	0.684253	0.0103839	0.0392019
ENSGALG00000010588		chr4	89250035	89251887	-	protein_coding	CCR4-NOT transcription complex, subunit 2 [Source:RefSeq peptide;Acc:NP_990529]	2.46256	-0.171227	0.00131719	0.00738952
ENSGALG00000013185	PITPNM1	chr5	77511	85880	-	protein_coding	phosphatidylinositol transfer protein, membrane-associated 1 [Source:HGNC Symbol;Acc:HGNC:9003]	2.31718	1.94741	0.00182329	0.00957985
ENSGALG00000003386	SPTB	chr5	142307	159206	-	protein_coding	spectrin, beta, erythrocytic [Source:HGNC Symbol;Acc:HGNC:11274]	2.14305	-0.146399	0.00811367	0.0322194
ENSGALG00000024090	UNC93B1	chr5	176152	179890	-	protein_coding	Uncharacterized protein [Source:UniProtKB/TrEMBL;Acc:Q5ZHK6]	2.17959	2.87782	0.0122991	0.0447825
ENSGALG00000003619		chr5	243271	244206	-	protein_coding	Olfactory receptor [Source:UniProtKB/TrEMBL;Acc:F1NTA9]	2.96325	0.383187	0.0038696	0.0175761
ENSGALG00000005175	BAAT	chr5	471495	473922	-	protein_coding	bile acid CoA:amino acid N-acyltransferase [Source:HGNC Symbol;Acc:HGNC:932]	3.88281	0.300081	5.44214e-05	0.000504017
ENSGALG00000004501		chr5	961363	962999	+	protein_coding	Uncharacterized protein [Source:UniProtKB/TrEMBL;Acc:E1C0Q3]	3.30533	0.121492	0.000658087	0.00410791
ENSGALG00000004267	SIGIRR	chr5	1555415	1560214	+	protein_coding	single Ig IL-1-related receptor [Source:RefSeq peptide;Acc:NP_001186471]	6.18256	1.76296	3.72373e-06	4.91047e-05
ENSGALG00000004044	CSRP3	chr5	1699237	1709220	-	protein_coding	cysteine and glycine-rich protein 3 [Source:RefSeq peptide;Acc:NP_001186415]	4.53061	3.44024	0.00135613	0.00756333
ENSGALG00000012032	PRRG4	chr5	5617015	5623941	+	protein_coding	transmembrane gamma-carboxyglutamic acid protein 4 precursor [Source:RefSeq peptide;Acc:NP_001186344]	3.04914	0.649672	0.00605216	0.0253998
ENSGALG00000006208	OTOG	chr5	11381876	11476414	+	protein_coding	otogelin [Source:HGNC Symbol;Acc:HGNC:8516]	8.44377	4.41678	9.774e-09	2.28606e-07
ENSGALG00000006602	SYT8	chr5	13487247	13490212	-	protein_coding	synaptotagmin VIII [Source:HGNC Symbol;Acc:HGNC:19264]	5.91552	1.54999	2.86619e-06	3.8919e-05
ENSGALG00000007217	BEST1	chr5	16141083	16148272	+	protein_coding	bestrophin 1 [Source:HGNC Symbol;Acc:HGNC:12703]	2.17141	-0.23594	0.00322645	0.0152531
ENSGALG00000010831		chr5	16165089	16180665	+	protein_coding	Uncharacterized protein [Source:UniProtKB/TrEMBL;Acc:F1NAZ0]	2.20052	-0.234617	0.0022529	0.0113876
ENSGALG00000028536	MPEG1	chr5	16208866	16211779	+	protein_coding	macrophage expressed 1 [Source:HGNC Symbol;Acc:HGNC:29619]	2.011	0.467772	8.53893e-06	0.000101273
ENSGALG00000004841	APLNR	chr5	16355389	16356501	+	protein_coding	apelin receptor [Source:HGNC Symbol;Acc:HGNC:339]	4.1106	2.90853	1.29063e-05	0.000145312
ENSGALG00000028376	Fgf19	chr5	16862037	16868089	-	protein_coding	fibroblast growth factor 19 precursor [Source:RefSeq peptide;Acc:NP_990005]	4.07949	4.18648	0.000689758	0.0042717
ENSGALG00000007562	FGF4	chr5	16892092	16895043	-	protein_coding	fibroblast growth factor 4 [Source:HGNC Symbol;Acc:HGNC:3682]	2.39693	-0.187942	0.00152645	0.0083178
ENSGALG00000007566		chr5	16929905	16955722	+	protein_coding	Uncharacterized protein [Source:UniProtKB/TrEMBL;Acc:F1NS68]	3.39082	0.0974507	0.000193721	0.00147166
ENSGALG00000007617	ANO1	chr5	17049568	17108690	+	protein_coding	anoctamin 1, calcium activated chloride channel [Source:HGNC Symbol;Acc:HGNC:21625]	7.19202	2.61812	7.42883e-08	1.49548e-06
ENSGALG00000028582	LMO2	chr5	17708714	17717820	-	protein_coding	Gallus gallus LIM domain only 2 (rhombotin-like 1) (LMO2), mRNA. [Source:RefSeq mRNA;Acc:NM_204271]	3.7395	4.61609	3.94006e-06	5.17256e-05
ENSGALG00000007886	PAMR1	chr5	18394011	18447963	-	protein_coding	peptidase domain containing associated with muscle regeneration 1 [Source:HGNC Symbol;Acc:HGNC:24554]	2.77832	2.70965	0.00577284	0.0244509
ENSGALG00000028047	RHOV	chr5	23569204	23575558	-	protein_coding	ras homolog family member V [Source:HGNC Symbol;Acc:HGNC:18313]	3.53852	1.10986	0.0053799	0.0230748
ENSGALG00000008599		chr5	23943885	23944826	+	protein_coding	Uncharacterized protein [Source:UniProtKB/TrEMBL;Acc:F1NY83]	4.35958	0.97945	0.000434526	0.00289766
ENSGALG00000028402		chr5	24752952	24764650	-	protein_coding	Uncharacterized protein [Source:UniProtKB/TrEMBL;Acc:R4GG74]	3.10316	0.00399151	0.000894291	0.00536574
ENSGALG00000009315	PAPLN	chr5	25589641	25615991	-	protein_coding	papilin, proteoglycan-like sulfated glycoprotein [Source:HGNC Symbol;Acc:HGNC:19262]	3.12828	1.10013	0.00852381	0.0336115
ENSGALG00000026215	CCDC177	chr5	27240840	27243396	+	protein_coding	coiled-coil domain containing 177 [Source:HGNC Symbol;Acc:HGNC:23243]	2.50343	1.12393	6.53939e-05	0.000592162
ENSGALG00000009507	PLEKHH1	chr5	28086530	28129476	+	protein_coding	pleckstrin homology domain containing, family H (with MyTH4 domain) member 1 [Source:HGNC Symbol;Acc:HGNC:17733]	3.09266	4.05336	0.00129844	0.0073045
ENSGALG00000009853	FOXG1	chr5	32806683	32807906	+	protein_coding	forkhead box protein G1 [Source:RefSeq peptide;Acc:NP_990524]	4.66162	0.699486	1.7276e-06	2.48564e-05
ENSGALG00000009920	Protein	chr5	33517885	33534657	+	protein_coding	Cochlin [Source:UniProtKB/Swiss-Prot;Acc:O42163]	4.91658	1.38708	0.000694124	0.00429531
ENSGALG00000010113		chr5	35995651	35997070	-	protein_coding	Uncharacterized protein [Source:UniProtKB/TrEMBL;Acc:F1NB11]	2.87977	1.48402	0.00295834	0.0142986
ENSGALG00000010114	Pax-9	chr5	35997255	36015533	+	protein_coding	Paired box protein Pax-9 [Source:UniProtKB/TrEMBL;Acc:F1N8W6]	3.73918	2.95299	0.000159662	0.0012482
ENSGALG00000010139	SS1R	chr5	36632383	36633663	+	protein_coding	somatostatin receptor type 1 [Source:RefSeq peptide;Acc:NP_001106638]	3.08926	0.138959	0.00172265	0.00915919
ENSGALG00000010518	NRXN3	chr5	38796212	39223738	+	protein_coding	neurexin 3 isoform a precursor [Source:RefSeq peptide;Acc:NP_001258852]	4.86871	1.47986	0.000279399	0.00201711
ENSGALG00000010820	CHGA	chr5	44155021	44165632	+	protein_coding	chromogranin A [Source:HGNC Symbol;Acc:HGNC:1929]	4.57595	5.53448	0.000200264	0.00151732
ENSGALG00000011225	SLC25A47	chr5	48456828	48465791	+	protein_coding	solute carrier family 25, member 47 [Source:HGNC Symbol;Acc:HGNC:20115]	2.41303	-0.182464	0.00164755	0.00882145
ENSGALG00000011244	DLK1	chr5	48844046	48853652	+	protein_coding	protein delta homolog 1 precursor [Source:RefSeq peptide;Acc:NP_001135726]	4.52103	0.620341	5.45133e-05	0.00050454
ENSGALG00000011581	KIF26A	chr5	50610382	50708576	+	protein_coding	kinesin family member 26A [Source:HGNC Symbol;Acc:HGNC:20226]	2.85258	5.06631	0.00343443	0.0160017
ENSGALG00000011656		chr5	51711521	51736637	-	protein_coding		2.65546	2.15291	0.00980304	0.0374355
ENSGALG00000011893	SLC38A6	chr5	54134021	54169085	-	protein_coding	solute carrier family 38, member 6 [Source:HGNC Symbol;Acc:HGNC:19863]	3.19852	5.99983	2.54037e-08	5.56693e-07
ENSGALG00000011911		chr5	54307428	54310044	-	protein_coding	Uncharacterized protein [Source:UniProtKB/TrEMBL;Acc:E1BVN2]	7.34234	2.74934	4.54705e-13	2.18074e-11
ENSGALG00000022994	SIX1	chr5	54315397	54317576	+	protein_coding	homeobox protein SIX1 [Source:RefSeq peptide;Acc:NP_001038150]	5.89513	4.21853	5.07764e-14	2.82523e-12
ENSGALG00000012021		chr5	54839246	54849270	+	protein_coding	Uncharacterized protein [Source:UniProtKB/TrEMBL;Acc:F7AVB9]	4.15521	0.433041	8.50406e-05	0.000736811
ENSGALG00000012023	DACT1	chr5	54991344	55000030	-	protein_coding	dapper homolog 1 [Source:RefSeq peptide;Acc:NP_001038157]	2.12292	4.05057	0.00680701	0.027915
ENSGALG00000001813		chr6	31077	35916	+	protein_coding	Uncharacterized protein [Source:UniProtKB/TrEMBL;Acc:F1NFT3]	2.03999	1.59016	4.37121e-06	5.66032e-05
ENSGALG00000001854		chr6	383920	392143	-	protein_coding	Uncharacterized protein [Source:UniProtKB/TrEMBL;Acc:F1NFP4]	6.82659	4.40682	4.29043e-09	1.06099e-07
ENSGALG00000002012	MMRN2	chr6	2083110	2101710	-	protein_coding	multimerin 2 [Source:HGNC Symbol;Acc:HGNC:19888]	2.99925	4.06178	2.86609e-05	0.000289742
ENSGALG00000002555	RET	chr6	4283164	4363396	-	protein_coding	ret proto-oncogene precursor [Source:RefSeq peptide;Acc:NP_990521]	2.89526	5.43345	0.000126076	0.00102854
ENSGALG00000002744	PCDH15	chr6	5764830	6063170	+	protein_coding	protocadherin-related 15 [Source:HGNC Symbol;Acc:HGNC:14674]	2.96423	3.80697	0.0037968	0.0173561
ENSGALG00000003073	RHOBTB1	chr6	8116443	8138753	+	protein_coding	rho-related BTB domain-containing protein 1 [Source:RefSeq peptide;Acc:NP_001186537]	2.95422	3.68043	0.00280441	0.0136848
ENSGALG00000003612	RNLS	chr6	8962083	9024949	+	protein_coding	renalase precursor [Source:RefSeq peptide;Acc:NP_001186528]	2.20818	2.10938	0.0108098	0.0404984
ENSGALG00000003814	Dkk-1	chr6	9764380	9766014	+	protein_coding	Uncharacterized protein [Source:UniProtKB/TrEMBL;Acc:F6ULT8]	7.19288	3.3862	1.32019e-12	5.91346e-11
ENSGALG00000004286	COL13A1	chr6	10558568	10638887	+	protein_coding	collagen, type XIII, alpha 1 [Source:HGNC Symbol;Acc:HGNC:2190]	5.55361	2.80916	1.05089e-05	0.000121113
ENSGALG00000004569	UNC5B	chr6	11331410	11360275	+	protein_coding	netrin receptor UNC5B precursor [Source:RefSeq peptide;Acc:NP_001026396]	2.40491	5.51222	3.47513e-05	0.000342321
ENSGALG00000004653		chr6	11375533	11501581	+	protein_coding	Uncharacterized protein [Source:UniProtKB/TrEMBL;Acc:F1NG38]	4.54145	1.52671	3.1972e-06	4.29631e-05
ENSGALG00000005207	SYNPO2L	chr6	15537987	15569127	+	protein_coding	synaptopodin 2-like [Source:HGNC Symbol;Acc:HGNC:23532]	3.3757	0.100272	0.000290036	0.00207915
ENSGALG00000020899		chr6	16089578	16107758	+	protein_coding	Uncharacterized protein [Source:UniProtKB/TrEMBL;Acc:E1BVD9]	2.84438	3.10036	0.00505225	0.0219203
ENSGALG00000005462	ZP4	chr6	16111040	16115551	-	protein_coding	zona pellucida sperm-binding protein 4 [Source:RefSeq peptide;Acc:NP_990210]	2.93887	-0.04431	0.000498044	0.00326467
ENSGALG00000005599		chr6	16330894	16340084	+	protein_coding	Uncharacterized protein [Source:UniProtKB/TrEMBL;Acc:F1NQS8]	4.85374	0.814775	1.76759e-05	0.000191756
ENSGALG00000005956		chr6	17424714	17438731	-	protein_coding	Annexin [Source:UniProtKB/TrEMBL;Acc:E1C8K3]	6.19361	1.98729	1.22739e-05	0.000138753
ENSGALG00000005981	GDF2	chr6	17554592	17557812	-	protein_coding	Dorsalin-1 [Source:UniProtKB/Swiss-Prot;Acc:P34822]	3.33691	0.0808179	0.000395656	0.00268113
ENSGALG00000006137	ARHGAP22	chr6	17831517	17965896	-	protein_coding	Rho GTPase activating protein 22 [Source:HGNC Symbol;Acc:HGNC:30320]	2.83856	1.85436	0.00322617	0.0152531
ENSGALG00000028136	CXCL12	chr6	18559508	18577315	-	protein_coding	stromal cell-derived factor 1 precursor [Source:RefSeq peptide;Acc:NP_989841]	2.84813	4.02414	5.07499e-06	6.47744e-05
ENSGALG00000006343	ACTG2	chr6	18777069	18785435	-	protein_coding	actin, aortic smooth muscle [Source:RefSeq peptide;Acc:NP_001026400]	2.41336	7.955	0.00116675	0.00667439
ENSGALG00000006384		chr6	18900981	18904128	+	protein_coding	Uncharacterized protein [Source:UniProtKB/TrEMBL;Acc:F1P3J2]	2.4462	-0.174629	0.00155888	0.00845894
ENSGALG00000006421	SLC16A12	chr6	18907922	18916250	-	protein_coding	solute carrier family 16, member 12 [Source:HGNC Symbol;Acc:HGNC:23094]	7.92463	3.28119	9.27908e-09	2.18465e-07
ENSGALG00000029169	HHEX	chr6	20253583	20257076	-	protein_coding	hematopoietically-expressed homeobox protein HHEX [Source:RefSeq peptide;Acc:NP_990583]	4.78459	3.63608	0.000481524	0.00317098
ENSGALG00000006973	BLNK	chr6	20638215	20730717	-	protein_coding	B-cell linker protein [Source:UniProtKB/Swiss-Prot;Acc:Q9YGC1]	3.39163	2.78414	0.00788289	0.0314433
ENSGALG00000007055		chr6	21486151	21531654	-	protein_coding	Uncharacterized protein [Source:UniProtKB/TrEMBL;Acc:E1C7Q7]	3.36334	1.96304	0.0106713	0.0400743
ENSGALG00000007090	CPN1	chr6	21583529	21590251	+	protein_coding	carboxypeptidase N catalytic chain precursor [Source:RefSeq peptide;Acc:NP_001264183]	2.26759	3.41545	0.00800023	0.0318311
ENSGALG00000020753		chr6	21669881	21670765	+	protein_coding	Uncharacterized protein [Source:UniProtKB/TrEMBL;Acc:F1P347]	4.42001	0.5692	5.9905e-06	7.43929e-05
ENSGALG00000007508	HPSE2	chr6	21711624	21788394	+	protein_coding	heparanase 2 (inactive) [Source:HGNC Symbol;Acc:HGNC:18374]	2.92519	2.00407	0.0057612	0.0244088
ENSGALG00000017419	HPS1	chr6	21789162	21793861	+	protein_coding	Hermansky-Pudlak syndrome 1 [Source:RefSeq peptide;Acc:NP_001026751]	3.38107	4.56672	4.72449e-08	9.92561e-07
ENSGALG00000013090	LOXL4	chr6	21800170	21804682	+	protein_coding	lysyl oxidase-like 4 [Source:HGNC Symbol;Acc:HGNC:17171]	5.34189	1.13144	2.61616e-06	3.60742e-05
ENSGALG00000027119		chr6	21801418	21802488	-	protein_coding	Uncharacterized protein [Source:UniProtKB/TrEMBL;Acc:R4GFP4]	3.07356	-0.00817409	6.89118e-05	0.000619684
ENSGALG00000007706	FGF8	chr6	22253323	22259681	+	protein_coding	fibroblast growth factor 8 precursor [Source:RefSeq peptide;Acc:NP_001012785]	6.656	2.56932	2.59459e-07	4.5514e-06
ENSGALG00000007831	TLX1	chr6	22577419	22580874	-	protein_coding	T-cell leukemia homeobox protein 1 [Source:UniProtKB/Swiss-Prot;Acc:O93366]	6.53834	3.08066	1.94164e-07	3.5274e-06
ENSGALG00000028196		chr6	22580918	22582108	-	protein_coding	Uncharacterized protein [Source:UniProtKB/TrEMBL;Acc:R4GIS5]	2.86796	-0.0693106	8.40195e-06	9.99316e-05
ENSGALG00000007837	KAZALD1	chr6	22598417	22602875	-	protein_coding	Kazal-type serine peptidase inhibitor domain 1 [Source:HGNC Symbol;Acc:HGNC:25460]	2.15538	5.76686	9.35153e-05	0.00079642
ENSGALG00000008840	ACSL5	chr6	26247834	26264411	+	protein_coding	long-chain-fatty-acid--CoA ligase 5 [Source:RefSeq peptide;Acc:NP_001026408]	2.89422	0.238574	0.0121738	0.0444511
ENSGALG00000008980	VWA2	chr6	27267818	27285089	+	protein_coding	von Willebrand factor A domain containing 2 [Source:HGNC Symbol;Acc:HGNC:24709]	4.2197	0.46255	6.43556e-05	0.000583873
ENSGALG00000023414	HMX2	chr6	31018104	31023370	+	protein_coding	H6 family homeobox 2 [Source:HGNC Symbol;Acc:HGNC:5018]	2.75238	-0.0998076	0.000440476	0.00292773
ENSGALG00000009693	CPXM2	chr6	31278697	31344582	-	protein_coding	carboxypeptidase X (M14 family), member 2 [Source:HGNC Symbol;Acc:HGNC:26977]	2.20419	-0.227491	0.00335051	0.0156989
ENSGALG00000009718	FAM53B	chr6	31636707	31661235	-	protein_coding	family with sequence similarity 53, member B [Source:HGNC Symbol;Acc:HGNC:28968]	2.25517	1.91804	0.000566344	0.00362725
ENSGALG00000027867	TEX36	chr6	32007895	32012786	-	protein_coding	testis expressed 36 [Source:HGNC Symbol;Acc:HGNC:31653]	2.7172	0.398625	0.014124	0.0499629
ENSGALG00000009823	PTPRE	chr6	32859478	32884309	+	protein_coding	protein tyrosine phosphatase, receptor type, E [Source:HGNC Symbol;Acc:HGNC:9669]	3.37751	3.02908	0.000779232	0.00475959
ENSGALG00000010461	EBF3	chr6	33682903	33790682	-	protein_coding	early B-cell factor 3 [Source:HGNC Symbol;Acc:HGNC:19087]	8.85206	5.32311	1.82301e-36	1.99746e-33
ENSGALG00000029149		chr7	3367	4695	-	protein_coding	Uncharacterized protein [Source:UniProtKB/TrEMBL;Acc:R4GJK2]	2.79174	-0.0945651	0.000512299	0.00333968
ENSGALG00000002594	TFPI	chr7	1033234	1060832	+	protein_coding	tissue factor pathway inhibitor (lipoprotein-associated coagulation inhibitor) [Source:HGNC Symbol;Acc:HGNC:11760]	5.32445	5.09286	7.74929e-07	1.21833e-05
ENSGALG00000002632	CALCRL	chr7	1099279	1125855	+	protein_coding	calcitonin gene-related peptide type 1 receptor precursor [Source:RefSeq peptide;Acc:NP_001157122]	2.05653	4.31402	0.000925941	0.00551384
ENSGALG00000002907	MYL1	chr7	2739204	2756780	-	protein_coding	Myosin light chain 1, skeletal muscle isoform [Source:UniProtKB/Swiss-Prot;Acc:P02604]	5.69139	1.36419	1.83446e-05	0.000197727
ENSGALG00000003553	ABCA12	chr7	4209985	4288793	-	protein_coding	ATP-binding cassette, sub-family A (ABC1), member 12 [Source:HGNC Symbol;Acc:HGNC:14637]	2.95639	-0.0424852	0.000847474	0.00512369
ENSGALG00000007511	ITGB2	chr7	7175043	7186628	-	protein_coding	integrin beta-2 precursor [Source:RefSeq peptide;Acc:NP_990582]	3.87112	0.30371	0.000322015	0.00225934
ENSGALG00000008908	NEUROD1	chr7	13758808	13759956	+	protein_coding	neurogenic differentiation factor 1 [Source:RefSeq peptide;Acc:NP_990251]	7.27096	2.68695	1.58483e-06	2.29881e-05
ENSGALG00000009089	titin	chr7	14648300	14691849	+	protein_coding	Uncharacterized protein [Source:UniProtKB/TrEMBL;Acc:F1NGF6]	4.19419	3.33888	0.00676501	0.0277937
ENSGALG00000018439	DLX1	chr7	17337963	17338619	-	protein_coding	Gallus gallus distal-less homeobox 1 (DLX1), mRNA. [Source:RefSeq mRNA;Acc:NM_001045842]	8.35747	3.6894	3.41373e-18	3.52356e-16
ENSGALG00000009513	METAP1D	chr7	17340599	17361534	-	protein_coding	methionyl aminopeptidase type 1D (mitochondrial) [Source:HGNC Symbol;Acc:HGNC:32583]	2.5948	4.04538	3.1345e-07	5.4316e-06
ENSGALG00000009545	SLC25A12	chr7	17412087	17457269	+	protein_coding	solute carrier family 25 (aspartate/glutamate carrier), member 12 [Source:HGNC Symbol;Acc:HGNC:10982]	2.15819	5.42969	2.18938e-07	3.91286e-06
ENSGALG00000010933		chr7	18880968	18930989	-	protein_coding	Uncharacterized protein [Source:UniProtKB/TrEMBL;Acc:F1NSM0]	2.28936	-0.217337	0.00099316	0.0058464
ENSGALG00000011009	SCN2A	chr7	19318427	19366026	-	protein_coding	sodium channel, voltage gated, type II alpha subunit [Source:HGNC Symbol;Acc:HGNC:10588]	2.63837	-0.056755	0.00101057	0.00593588
ENSGALG00000011040	SCN3A	chr7	19411316	19468431	+	protein_coding	sodium channel, voltage gated, type III alpha subunit [Source:HGNC Symbol;Acc:HGNC:10590]	2.05405	-0.15157	0.00747872	0.0300923
ENSGALG00000011252		chr7	21628477	21632296	+	protein_coding	Uncharacterized protein [Source:UniProtKB/TrEMBL;Acc:F1P341]	2.48602	3.84532	9.29663e-06	0.000108987
ENSGALG00000026721		chr7	21631194	21632426	-	protein_coding	Uncharacterized protein [Source:UniProtKB/TrEMBL;Acc:R4GK29]	2.30332	2.7466	1.06329e-05	0.000122268
ENSGALG00000026698	FEV	chr7	21853455	21857352	+	protein_coding	FEV (ETS oncogene family) [Source:HGNC Symbol;Acc:HGNC:18562]	2.29612	-0.209086	0.00111107	0.00642295
ENSGALG00000011433	VIL1	chr7	22032622	22037892	-	protein_coding	villin-1 [Source:RefSeq peptide;Acc:NP_990773]	2.8738	0.365007	0.0129952	0.0468142
ENSGALG00000018521	CATIP	chr7	22054330	22056268	-	protein_coding	ciliogenesis associated TTC17 interacting protein [Source:HGNC Symbol;Acc:HGNC:25062]	3.6307	0.196132	7.52073e-05	0.000669533
ENSGALG00000011566	GYPC	chr7	23526353	23552998	-	protein_coding	glycophorin C (Gerbich blood group) [Source:RefSeq peptide;Acc:NP_001004407]	3.072	4.58688	9.05642e-10	2.51461e-08
ENSGALG00000012092	ESYT3	chr7	27789278	27816492	-	protein_coding	extended synaptotagmin-like protein 3 [Source:HGNC Symbol;Acc:HGNC:24295]	5.07829	3.56997	5.30267e-05	0.000492792
ENSGALG00000012190	TMEM163	chr7	29843289	29923932	-	protein_coding	transmembrane protein 163 [Source:HGNC Symbol;Acc:HGNC:25380]	4.07878	0.837441	0.0029071	0.014099
ENSGALG00000028759	LYPD6B	chr7	34342481	34374375	+	protein_coding	LY6/PLAUR domain containing 6B [Source:HGNC Symbol;Acc:HGNC:27018]	3.24655	2.86914	0.00448513	0.0198713
ENSGALG00000012481	TNFIP6	chr7	34630769	34644425	+	protein_coding	tumor necrosis factor-inducible gene 6 protein precursor [Source:RefSeq peptide;Acc:NP_001032926]	6.26518	1.82039	2.22589e-06	3.10534e-05
ENSGALG00000012538	NR4A2	chr7	35531192	35536596	-	protein_coding	nuclear receptor subfamily 4, group A, member 2 [Source:HGNC Symbol;Acc:HGNC:7981]	3.13953	0.59726	0.00151232	0.00825638
ENSGALG00000012545	CYTIP	chr7	35716692	35725457	-	protein_coding	cytohesin 1 interacting protein [Source:HGNC Symbol;Acc:HGNC:9506]	2.6295	-0.132224	0.000834379	0.00505956
ENSGALG00000001896	NTNG1	chr8	822750	960453	+	protein_coding	netrin G1 [Source:HGNC Symbol;Acc:HGNC:23319]	2.17394	1.66562	9.95369e-05	0.000840927
ENSGALG00000002207	ATP6V1G3	chr8	2100045	2111059	+	protein_coding	ATPase, H+ transporting, lysosomal 13kDa, V1 subunit G3 [Source:HGNC Symbol;Acc:HGNC:18265]	3.90909	0.312877	5.2983e-05	0.000492792
ENSGALG00000002451	KCNT2	chr8	2684298	2791265	+	protein_coding	potassium channel, sodium activated subfamily T, member 2 [Source:HGNC Symbol;Acc:HGNC:18866]	2.26389	2.51175	0.00393484	0.0178043
ENSGALG00000002549	RGS1	chr8	3600074	3604434	-	protein_coding	regulator of G-protein signaling 1 [Source:HGNC Symbol;Acc:HGNC:9991]	4.22609	0.460977	8.68268e-05	0.000749552
ENSGALG00000021074	MYOC	chr8	4707987	4710477	+	protein_coding	myocilin, trabecular meshwork inducible glucocorticoid response [Source:HGNC Symbol;Acc:HGNC:7610]	2.65057	-0.0287816	0.00297796	0.0143839
ENSGALG00000003324	PRRX1	chr8	4818202	4849737	-	protein_coding	paired mesoderm homeobox protein 1 [Source:RefSeq peptide;Acc:NP_001264653]	4.63303	3.1354	3.48017e-14	1.99885e-12
ENSGALG00000003334	METTL11B	chr8	4947464	4964307	-	protein_coding	methyltransferase like 11B [Source:HGNC Symbol;Acc:HGNC:31932]	3.23611	0.044998	0.00019191	0.00146258
ENSGALG00000003885		chr8	5805597	5806479	-	protein_coding	Uncharacterized protein [Source:UniProtKB/TrEMBL;Acc:F1NCA0]	3.66377	0.162869	0.000108938	0.0009069
ENSGALG00000004163	NPHS2	chr8	6115623	6121916	+	protein_coding	nephrosis 2, idiopathic, steroid-resistant (podocin) [Source:HGNC Symbol;Acc:HGNC:13394]	3.23771	0.0227496	0.00038725	0.00263042
ENSGALG00000004424	SEC16B	chr8	6597575	6608922	+	protein_coding	protein transport protein Sec16B [Source:RefSeq peptide;Acc:NP_001026440]	2.7297	0.30791	0.00899112	0.03503
ENSGALG00000004526	TNR	chr8	6987423	7040612	+	protein_coding	tenascin-R precursor [Source:RefSeq peptide;Acc:NP_990607]	3.70059	0.285358	7.54832e-05	0.000670313
ENSGALG00000004857	BRINP3	chr8	8198959	8401728	+	protein_coding	bone morphogenetic protein/retinoic acid inducible neural-specific 3 [Source:HGNC Symbol;Acc:HGNC:22393]	3.59966	0.551767	0.00303956	0.0146258
ENSGALG00000005208	S1PR1	chr8	10616090	10617229	-	protein_coding	sphingosine-1-phosphate receptor 1 [Source:HGNC Symbol;Acc:HGNC:3165]	2.23918	2.33271	0.00935851	0.0361523
ENSGALG00000005257	VCAM1	chr8	10818883	10826594	+	protein_coding	vascular cell adhesion molecule 1 [Source:HGNC Symbol;Acc:HGNC:12663]	4.74221	0.744473	0.000134264	0.00107926
ENSGALG00000020791	CLCA2	chr8	14916579	14928355	-	protein_coding	chloride channel accessory 2 [Source:HGNC Symbol;Acc:HGNC:2016]	5.73433	4.04518	2.07103e-05	0.000218354
ENSGALG00000008709	MCOLN3	chr8	15314683	15329774	+	protein_coding	mucolipin 3 [Source:HGNC Symbol;Acc:HGNC:13358]	3.73703	0.240258	0.000381737	0.00259545
ENSGALG00000008890	ADGRL4	chr8	17428093	17504825	+	protein_coding	adhesion G protein-coupled receptor L4 [Source:HGNC Symbol;Acc:HGNC:20822]	4.5151	0.619239	9.35419e-05	0.00079642
ENSGALG00000010469		chr8	20783471	20790800	+	protein_coding	Uncharacterized protein [Source:UniProtKB/TrEMBL;Acc:F1NNP0]	2.22898	-0.228771	0.00307261	0.0147297
ENSGALG00000010473	PDZK1IP1	chr8	20794711	20799010	-	protein_coding	PDZK1-interacting protein 1 precursor [Source:RefSeq peptide;Acc:NP_001264522]	2.77093	-0.0977771	0.000531584	0.00343864
ENSGALG00000023296	SCL	chr8	20810415	20813774	-	protein_coding	Gallus gallus T-cell acute lymphocytic leukemia 1 (TAL1), mRNA. [Source:RefSeq mRNA;Acc:NM_205352]	3.55051	0.160695	0.000310043	0.00218735
ENSGALG00000028153		chr8	20873411	20875481	+	protein_coding	Uncharacterized protein [Source:UniProtKB/TrEMBL;Acc:R4GI79]	6.45732	2.40855	9.03652e-06	0.000106377
ENSGALG00000010785	ACOT11	chr8	24131387	24140486	+	protein_coding	acyl-CoA thioesterase 11 [Source:HGNC Symbol;Acc:HGNC:18156]	3.22697	1.45753	0.00310762	0.0148173
ENSGALG00000010826	PRKAA2	chr8	24663005	24679845	+	protein_coding	5'-AMP-activated protein kinase catalytic subunit alpha-2 [Source:RefSeq peptide;Acc:NP_001034694]	3.44619	0.122651	9.17946e-05	0.000783416
ENSGALG00000011058	LPR	chr8	27238562	27268762	+	protein_coding	leptin receptor precursor [Source:RefSeq peptide;Acc:NP_989654]	5.00946	0.910991	7.50751e-05	0.000668774
ENSGALG00000011115	WDR78	chr8	27471548	27487186	-	protein_coding	WD repeat domain 78 [Source:HGNC Symbol;Acc:HGNC:26252]	2.99964	1.95933	1.34693e-07	2.5615e-06
ENSGALG00000001327	AIRE	chr9	382665	385476	+	protein_coding	autoimmune regulator [Source:HGNC Symbol;Acc:HGNC:360]	2.29638	-0.144907	0.00370524	0.017036
ENSGALG00000001780	PROC	chr9	788897	797608	+	protein_coding	vitamin K-dependent protein C precursor [Source:RefSeq peptide;Acc:NP_989772]	3.55314	0.167106	0.000181591	0.00139514
ENSGALG00000002263	KLHL6	chr9	2069219	2087633	-	protein_coding	kelch-like 6 [Source:RefSeq peptide;Acc:NP_001026474]	4.77636	0.882526	0.000278113	0.00201089
ENSGALG00000021009	FOXL2	chr9	5200075	5200992	-	protein_coding	forkhead box protein L2 [Source:RefSeq peptide;Acc:NP_001012630]	3.86575	1.85877	0.00017693	0.00136374
ENSGALG00000021057	KCNE4	chr9	7608275	7608766	+	protein_coding	potassium channel, voltage gated subfamily E regulatory beta subunit 4 [Source:HGNC Symbol;Acc:HGNC:6244]	3.38536	0.100244	8.10747e-05	0.000708918
ENSGALG00000024000	7	chr9	11878868	11880012	+	protein_coding	Type-1 angiotensin II receptor [Source:UniProtKB/Swiss-Prot;Acc:P79785]	3.65136	1.93293	0.003217	0.0152236
ENSGALG00000007324	TP63	chr9	13522136	13675334	-	protein_coding	tumor protein 63 [Source:RefSeq peptide;Acc:NP_989682]	3.07955	0.588911	0.00904629	0.0351775
ENSGALG00000007419	MASP1	chr9	14339432	14355179	+	protein_coding	mannan-binding lectin serine protease 1 precursor [Source:RefSeq peptide;Acc:NP_998751]	5.35827	1.30821	2.97777e-05	0.000300179
ENSGALG00000007701	B3GNT7	chr9	14744529	14748605	+	protein_coding	UDP-GlcNAc:betaGal beta-1,3-N-acetylglucosaminyltransferase 7 [Source:HGNC Symbol;Acc:HGNC:18811]	2.89466	3.90973	0.000193079	0.00146756
ENSGALG00000007814		chr9	15043911	15046938	+	protein_coding	Alkaline phosphatase [Source:UniProtKB/TrEMBL;Acc:E1C0U5]	2.27474	-0.212544	0.00206791	0.0105878
ENSGALG00000027617		chr9	17089500	17208056	-	protein_coding	Uncharacterized protein [Source:UniProtKB/TrEMBL;Acc:R4GHT5]	5.0091	1.40294	5.34167e-06	6.78135e-05
ENSGALG00000009355	CLDN11	chr9	19248959	19256591	-	protein_coding	claudin 11 [Source:HGNC Symbol;Acc:HGNC:8514]	2.44856	1.61206	0.00383912	0.0174822
ENSGALG00000009437	MECOM	chr9	19449373	19752139	+	protein_coding	MDS1 and EVI1 complex locus [Source:HGNC Symbol;Acc:HGNC:3498]	3.0242	4.29562	3.10415e-13	1.52467e-11
ENSGALG00000009468		chr9	20016228	20026060	-	protein_coding	Uncharacterized protein [Source:UniProtKB/TrEMBL;Acc:F1NXD6]	3.75782	0.233635	0.000132959	0.00107059
ENSGALG00000020627	SHOX2	chr9	22073505	22076647	+	protein_coding	short stature homeobox 2 [Source:HGNC Symbol;Acc:HGNC:10854]	2.05618	-0.257892	0.00253107	0.012575
ENSGALG00000010337	7	chr9	22627534	22648732	+	protein_coding	Probable G-protein coupled receptor 149 [Source:UniProtKB/Swiss-Prot;Acc:Q9DDD1]	3.55606	0.597736	0.00329795	0.0154883
ENSGALG00000010357	7	chr9	22832785	22835332	-	protein_coding	P2Y purinoceptor 1 [Source:UniProtKB/Swiss-Prot;Acc:P34996]	3.57101	1.53153	0.000280508	0.00202209
ENSGALG00000027400		chr9	23437761	23438972	-	protein_coding	Uncharacterized protein [Source:UniProtKB/TrEMBL;Acc:R4GM89]	2.34429	0.439556	0.000170228	0.00131994
ENSGALG00000025885	COR7A	chr10	276437	277408	+	protein_coding	chick olfactory receptor 7a [Source:RefSeq peptide;Acc:NP_001025563]	2.78645	0.0167862	0.00430101	0.0191868
ENSGALG00000002560		chr10	283204	284133	-	protein_coding	Olfactory receptor [Source:UniProtKB/TrEMBL;Acc:F1NWU8]	2.07047	-0.254276	0.00382331	0.0174381
ENSGALG00000002097		chr10	890806	892892	-	protein_coding	uncharacterized protein LOC415324 [Source:RefSeq peptide;Acc:NP_001180205]	2.83414	-0.0761147	0.000680177	0.0042254
ENSGALG00000002093	NR2E3	chr10	896000	899679	+	protein_coding	photoreceptor-specific nuclear receptor [Source:RefSeq peptide;Acc:NP_989925]	2.14013	-0.24264	0.00343536	0.0160017
ENSGALG00000028855	CCDC33	chr10	2060314	2084749	-	protein_coding	coiled-coil domain containing 33 [Source:HGNC Symbol;Acc:HGNC:26552]	2.23333	-0.222594	0.00204649	0.010497
ENSGALG00000001552		chr10	2126745	2130034	+	protein_coding	Uncharacterized protein [Source:UniProtKB/TrEMBL;Acc:F1NPF5]	3.24828	0.0162843	0.00016137	0.00125879
ENSGALG00000002678	CSPG4	chr10	2203963	2222300	-	protein_coding	chondroitin sulfate proteoglycan 4 [Source:HGNC Symbol;Acc:HGNC:2466]	3.16008	0.0245668	0.000319308	0.00224382
ENSGALG00000003014	CHRNA3	chr10	3121889	3127878	+	protein_coding	Neuronal acetylcholine receptor subunit alpha-3 [Source:UniProtKB/Swiss-Prot;Acc:P09481]	3.3006	2.4813	0.00861246	0.0338641
ENSGALG00000003456	CA12	chr10	3588343	3607364	+	protein_coding	carbonic anhydrase XII [Source:HGNC Symbol;Acc:HGNC:1371]	3.76791	3.59079	0.00167477	0.00894131
ENSGALG00000028158	FGF7	chr10	10038183	10069033	+	protein_coding	keratinocyte growth factor [Source:RefSeq peptide;Acc:NP_001012543]	4.80244	0.776871	4.98337e-05	0.000468845
ENSGALG00000006045	SH3GL3	chr10	10908822	10953483	+	protein_coding	endophilin-A3 [Source:RefSeq peptide;Acc:NP_989859]	2.60105	3.11329	0.00344881	0.0160329
ENSGALG00000006104	ADAMTSL3	chr10	10980738	11157843	+	protein_coding	ADAMTS-like 3 [Source:HGNC Symbol;Acc:HGNC:14633]	8.66635	3.97923	9.39319e-08	1.85829e-06
ENSGALG00000006376	TMC3	chr10	11575708	11593383	+	protein_coding	transmembrane channel-like protein 3 [Source:RefSeq peptide;Acc:NP_001005820]	2.69029	-0.117323	0.00126494	0.0071414
ENSGALG00000006981	MCTP2	chr10	14461079	14573856	+	protein_coding	multiple C2 domains, transmembrane 2 [Source:HGNC Symbol;Acc:HGNC:25636]	2.86792	2.53573	0.00370653	0.0170364
ENSGALG00000021024		chr10	17269580	17276590	-	protein_coding	Uncharacterized protein [Source:UniProtKB/TrEMBL;Acc:E1BQR3]	5.42849	2.36753	1.07324e-05	0.000123284
ENSGALG00000007631	MEGF11	chr10	17666849	17858077	-	protein_coding	multiple EGF-like-domains 11 [Source:HGNC Symbol;Acc:HGNC:29635]	2.71326	1.64775	0.0073514	0.0296638
ENSGALG00000025898	SMAD6	chr10	18171488	18201886	+	protein_coding	Mothers against decapentaplegic homolog 6 [Source:UniProtKB/Swiss-Prot;Acc:Q9W734]	3.24377	3.97942	6.56195e-08	1.33909e-06
ENSGALG00000026032		chr10	18665947	18683065	-	protein_coding	Uncharacterized protein [Source:UniProtKB/TrEMBL;Acc:R4GGS1]	2.22826	-0.223317	0.000816321	0.00496062
ENSGALG00000008302	CIB1	chr10	19537085	19539574	-	protein_coding	calcium and integrin-binding protein 1 isoform a [Source:RefSeq peptide;Acc:NP_001264577]	2.51674	5.40807	7.85268e-12	3.01492e-10
ENSGALG00000008340	FES	chr10	19587025	19592804	-	protein_coding	FES proto-oncogene, tyrosine kinase [Source:HGNC Symbol;Acc:HGNC:3657]	3.6755	0.210869	0.000319238	0.00224382
ENSGALG00000013914	SERINC4	chr10	19616509	19620261	+	protein_coding	serine incorporator 4 [Source:HGNC Symbol;Acc:HGNC:32237]	2.57616	1.44069	0.00747316	0.0300785
ENSGALG00000021512		chr11	51584	52510	-	protein_coding	Uncharacterized protein [Source:UniProtKB/TrEMBL;Acc:E1C8U0]	2.24585	0.525176	0.0133702	0.0478638
ENSGALG00000000774	TLR21	chr11	342413	345901	+	protein_coding	Toll-like receptor 21 precursor [Source:RefSeq peptide;Acc:NP_001025729]	2.82204	-0.08077	0.000898585	0.00538471
ENSGALG00000001234	CETP	chr11	620994	627089	+	protein_coding	cholesteryl ester transfer protein precursor [Source:RefSeq peptide;Acc:NP_001029986]	2.33788	-0.200977	0.00244706	0.012213
ENSGALG00000024466		chr11	777104	778328	+	protein_coding	C-C motif chemokine [Source:UniProtKB/TrEMBL;Acc:E1BSY1]	2.75351	0.208808	0.0130488	0.0469835
ENSGALG00000002407	HYDIN	chr11	1537250	1641091	+	protein_coding	HYDIN, axonemal central pair apparatus protein [Source:HGNC Symbol;Acc:HGNC:19368]	2.47392	-0.168633	0.00169905	0.00905737
ENSGALG00000002775	FA2H	chr11	1883699	1891541	-	protein_coding	fatty acid 2-hydroxylase [Source:HGNC Symbol;Acc:HGNC:21197]	3.1879	3.28158	0.00155244	0.00843361
ENSGALG00000023828	LDHD	chr11	1954985	1958515	-	protein_coding	lactate dehydrogenase D [Source:HGNC Symbol;Acc:HGNC:19708]	4.13495	1.5902	5.37161e-05	0.000498133
ENSGALG00000003323	OSGIN1	chr11	2590160	2594660	-	protein_coding	oxidative stress induced growth inhibitor 1 [Source:HGNC Symbol;Acc:HGNC:30093]	2.46408	-0.172231	0.00203269	0.010453
ENSGALG00000003580	MMP2	chr11	3182494	3220410	-	protein_coding	72 kDa type IV collagenase [Source:UniProtKB/Swiss-Prot;Acc:Q90611]	2.64	7.38406	1.33467e-07	2.54159e-06
ENSGALG00000028008		chr11	3198830	3198884	+	miRNA		2.37248	2.94545	5.64728e-07	9.20365e-06
ENSGALG00000003588		chr11	3660025	3663534	-	protein_coding	Uncharacterized protein [Source:UniProtKB/TrEMBL;Acc:E1C7A8]	2.27758	0.915688	0.00192358	0.0099925
ENSGALG00000005272	CDH5	chr11	10982217	11011468	-	protein_coding	Cadherin-5 [Source:UniProtKB/Swiss-Prot;Acc:Q8AYD0]	5.07172	3.59689	0.0032798	0.0154489
ENSGALG00000005361		chr11	13417403	13423498	+	protein_coding	Uncharacterized protein [Source:UniProtKB/TrEMBL;Acc:F1NZ98]	2.54513	-0.106641	0.00226213	0.0114302
ENSGALG00000005467	HSD17B2	chr11	15211744	15220427	+	protein_coding	hydroxysteroid (17-beta) dehydrogenase 2 [Source:HGNC Symbol;Acc:HGNC:5211]	3.96533	1.32334	0.00257082	0.0127193
ENSGALG00000005728		chr11	16858663	16867226	-	protein_coding		3.49708	0.139436	4.10835e-06	5.36383e-05
ENSGALG00000006242	PABPN1L	chr11	17993034	17995848	-	protein_coding	poly(A) binding protein, nuclear 1-like (cytoplasmic) [Source:HGNC Symbol;Acc:HGNC:37237]	2.86048	0.640076	0.0026835	0.0131715
ENSGALG00000006234	CBFA2T3	chr11	17999326	18017927	-	protein_coding	protein CBFA2T3 [Source:RefSeq peptide;Acc:NP_001025751]	3.24521	0.932615	2.40692e-05	0.00024934
ENSGALG00000000893	TAT	chr11	19280394	19289813	+	protein_coding	tyrosine aminotransferase [Source:HGNC Symbol;Acc:HGNC:11573]	3.6294	0.196946	0.000249244	0.00182156
ENSGALG00000028339	AMIGO3	chr12	2379402	2380922	-	protein_coding	adhesion molecule with Ig-like domain 3 [Source:HGNC Symbol;Acc:HGNC:24075]	2.41186	3.66545	8.29967e-05	0.000721737
ENSGALG00000025992	CDHR4	chr12	2420987	2427304	-	protein_coding	cadherin-related family member 4 [Source:HGNC Symbol;Acc:HGNC:34527]	3.55749	0.353944	5.48074e-06	6.91476e-05
ENSGALG00000004476	SEMA3G	chr12	3118857	3124115	-	protein_coding	sema domain, immunoglobulin domain (Ig), short basic domain, secreted, (semaphorin) 3G [Source:HGNC Symbol;Acc:HGNC:30400]	2.46125	5.14601	5.32878e-05	0.000494483
ENSGALG00000013722	SEMA3B	chr12	3221940	3226152	+	protein_coding	sema domain, immunoglobulin domain (Ig), short basic domain, secreted, (semaphorin) 3B [Source:HGNC Symbol;Acc:HGNC:10724]	3.05759	0.498808	0.000136142	0.00109167
ENSGALG00000004930	HRH1	chr12	4370554	4371978	+	protein_coding	histamine receptor H1 [Source:HGNC Symbol;Acc:HGNC:5182]	2.88472	-0.0804891	0.00110013	0.00637263
ENSGALG00000005131	BARX1	chr12	6125099	6126552	+	protein_coding	homeobox protein BarH-like 1b [Source:RefSeq peptide;Acc:NP_989524]	2.86443	0.0729364	0.000129265	0.00104676
ENSGALG00000005419	ERC2	chr12	8028015	8344033	-	protein_coding	ELKS/RAB6-interacting/CAST family member 2 [Source:HGNC Symbol;Acc:HGNC:31922]	2.22652	3.03347	0.0133513	0.0478189
ENSGALG00000026089	SLC26A6	chr12	9039885	9045644	+	protein_coding	solute carrier family 26 member 6 [Source:RefSeq peptide;Acc:NP_001239183]	2.7492	-0.0998353	0.00102963	0.00603345
ENSGALG00000006651	OGG1	chr12	11461614	11463556	+	protein_coding	N-glycosylase/DNA lyase [Source:RefSeq peptide;Acc:NP_001264767]	2.1332	2.9387	0.000103073	0.000866689
ENSGALG00000006937	P4HTM	chr12	11639594	11652624	-	protein_coding	prolyl 4-hydroxylase, transmembrane (endoplasmic reticulum) [Source:HGNC Symbol;Acc:HGNC:28858]	2.47821	0.933903	0.00458258	0.0202652
ENSGALG00000007785	PROK2	chr12	16290360	16292199	-	protein_coding	prokineticin 2 [Source:HGNC Symbol;Acc:HGNC:18455]	2.98791	-0.0353419	0.000493839	0.00324308
ENSGALG00000007862	CNTN3	chr12	16877532	16970255	-	protein_coding	contactin 3 (plasmacytoma associated) [Source:HGNC Symbol;Acc:HGNC:2173]	2.35209	2.58616	0.00571604	0.0242739
ENSGALG00000008339	GRM7	chr12	18847535	19073767	+	protein_coding	glutamate receptor, metabotropic 7 [Source:HGNC Symbol;Acc:HGNC:4599]	2.65988	2.10431	0.00846365	0.0333858
ENSGALG00000008349	LMCD1	chr12	19214897	19234835	+	protein_coding	LIM and cysteine-rich domains 1 [Source:HGNC Symbol;Acc:HGNC:6633]	2.51647	3.27548	0.000165954	0.00129031
ENSGALG00000026141		chr13	89809	91332	+	protein_coding	Uncharacterized protein [Source:UniProtKB/TrEMBL;Acc:R4GL65]	2.50543	1.08541	0.00115849	0.00664047
ENSGALG00000002570		chr13	1308096	1310139	+	protein_coding	Uncharacterized protein [Source:UniProtKB/TrEMBL;Acc:F1NHZ1]	2.48604	-0.171813	0.000795388	0.0048396
ENSGALG00000002562	ARAP3	chr13	1309826	1324899	-	protein_coding	ArfGAP with RhoGAP domain, ankyrin repeat and PH domain 3 [Source:HGNC Symbol;Acc:HGNC:24097]	7.26638	2.6805	9.27059e-10	2.55911e-08
ENSGALG00000002577	STARD10	chr13	1328980	1335143	-	protein_coding	StAR-related lipid transfer (START) domain containing 10 [Source:HGNC Symbol;Acc:HGNC:10666]	2.42271	3.62683	0.0049284	0.0214771
ENSGALG00000002203	FGF18	chr13	2567435	2611832	-	protein_coding	Gallus gallus fibroblast growth factor 18 (FGF18), mRNA. [Source:RefSeq mRNA;Acc:NM_204714]	3.74315	2.71665	0.00157566	0.00852075
ENSGALG00000002118	CO6	chr13	3153571	3162255	+	protein_coding	calcium-activated potassium channel subunit beta-1 [Source:RefSeq peptide;Acc:NP_989933]	4.26915	1.03348	0.00108342	0.00628657
ENSGALG00000001255	ARHGEF37	chr13	7763330	7774372	-	protein_coding	Rho guanine nucleotide exchange factor (GEF) 37 [Source:HGNC Symbol;Acc:HGNC:34430]	4.38778	0.539631	0.000111693	0.000927133
ENSGALG00000002704	AFAP1L1	chr13	7864573	7883261	-	protein_coding	actin filament associated protein 1-like 1 [Source:HGNC Symbol;Acc:HGNC:26714]	3.29405	3.04266	0.000100683	0.000849103
ENSGALG00000002790	ABLIM3	chr13	7884129	7919331	-	protein_coding	actin binding LIM protein family, member 3 [Source:HGNC Symbol;Acc:HGNC:29132]	5.66737	2.04396	1.89872e-05	0.000202891
ENSGALG00000002846	NEURL1B	chr13	8254942	8280226	-	protein_coding	neuralized E3 ubiquitin protein ligase 1B [Source:HGNC Symbol;Acc:HGNC:35422]	3.75552	0.442358	2.50317e-05	0.000257067
ENSGALG00000002886	NKX2-5	chr13	8535721	8537935	-	protein_coding	homeobox protein Nkx-2.5 [Source:RefSeq peptide;Acc:NP_990495]	8.22918	3.56709	6.49901e-11	2.14784e-09
ENSGALG00000018998	UNC5A	chr13	9652962	9657656	-	protein_coding	unc-5 homolog A (C. elegans) [Source:HGNC Symbol;Acc:HGNC:12567]	3.8177	0.863481	0.00165461	0.00885028
ENSGALG00000003285	CDHR2	chr13	9688763	9697357	-	protein_coding	cadherin-related family member 2 [Source:HGNC Symbol;Acc:HGNC:18231]	3.35144	0.151623	0.00136737	0.00761707
ENSGALG00000003512	SPINK7	chr13	9876040	9900608	+	protein_coding	Ovomucoid [Source:UniProtKB/Swiss-Prot;Acc:P01005]	6.09962	6.02515	1.28358e-08	2.93943e-07
ENSGALG00000027387	SPINK5	chr13	9909229	9913885	+	protein_coding	serine peptidase inhibitor, Kazal type 5 [Source:HGNC Symbol;Acc:HGNC:15464]	5.29648	1.09793	1.49137e-05	0.000165058
ENSGALG00000026787	HAND1	chr13	11453019	11454119	+	protein_coding	heart- and neural crest derivatives-expressed protein 1 [Source:RefSeq peptide;Acc:NP_990296]	3.28594	0.362931	0.000646664	0.00404527
ENSGALG00000004357	ANXA6	chr13	12350519	12362997	+	protein_coding	annexin A6 [Source:RefSeq peptide;Acc:NP_990061]	3.06706	4.52008	1.32066e-06	1.94937e-05
ENSGALG00000004521	GPX3	chr13	12377503	12379482	-	protein_coding	glutathione peroxidase 3 precursor [Source:RefSeq peptide;Acc:NP_001156704]	3.86805	4.08838	3.69449e-15	2.53001e-13
ENSGALG00000005672	SLC6A7	chr13	12538728	12548642	-	protein_coding	solute carrier family 6 (neurotransmitter transporter), member 7 [Source:HGNC Symbol;Acc:HGNC:11054]	5.81244	1.46504	5.32301e-06	6.76369e-05
ENSGALG00000005679	CDX-A	chr13	12551722	12561961	-	protein_coding	Homeobox protein CDX-1 [Source:UniProtKB/Swiss-Prot;Acc:Q9DEB6]	2.40938	-0.181801	0.00189999	0.00989523
ENSGALG00000005725	CSF1R	chr13	12594407	12611465	+	protein_coding	colony stimulating factor 1 receptor [Source:HGNC Symbol;Acc:HGNC:2433]	3.00721	-0.0240405	0.000683183	0.00423835
ENSGALG00000005802	FLT4	chr13	12682533	12711218	+	protein_coding	fms-related tyrosine kinase 4 [Source:HGNC Symbol;Acc:HGNC:3767]	4.24144	3.71691	0.000378531	0.00258104
ENSGALG00000006708	COL23A1	chr13	13578334	13606087	+	protein_coding	collagen, type XXIII, alpha 1 [Source:HGNC Symbol;Acc:HGNC:22990]	2.70452	4.4394	1.02044e-18	1.17219e-16
ENSGALG00000006297	TRPC7	chr13	14312689	14371262	+	protein_coding	transient receptor potential cation channel, subfamily C, member 7 [Source:HGNC Symbol;Acc:HGNC:20754]	3.39741	0.245334	0.00240985	0.0120611
ENSGALG00000006346	JSC	chr13	14654459	14662648	+	protein_coding	C-X-C motif chemokine 14 precursor [Source:RefSeq peptide;Acc:NP_990043]	5.75685	8.13973	3.2338e-18	3.3622e-16
ENSGALG00000006907	SOWAHA	chr13	16410668	16411957	+	protein_coding	sosondowah ankyrin repeat domain family member A [Source:HGNC Symbol;Acc:HGNC:27033]	2.95591	0.460023	2.69727e-05	0.000274628
ENSGALG00000026251	SPRY4	chr13	16670608	16671501	-	protein_coding	protein sprouty homolog 4 [Source:RefSeq peptide;Acc:NP_001073203]	2.90517	-0.0083952	1.41763e-07	2.66394e-06
ENSGALG00000003217	LITAF	chr14	924499	931316	+	protein_coding	lipopolysaccharide-induced tumor necrosis factor-alpha factor homolog [Source:RefSeq peptide;Acc:NP_989598]	3.49332	1.48191	0.00517207	0.0223043
ENSGALG00000004398	CARD11	chr14	3426898	3466182	-	protein_coding	caspase recruitment domain-containing protein 11 [Source:RefSeq peptide;Acc:NP_001006161]	3.37687	0.169169	0.00146432	0.00805009
ENSGALG00000004745	C14H17ORF103	chr14	4510804	4517041	+	protein_coding	Protein NATD1 [Source:UniProtKB/Swiss-Prot;Acc:Q5ZJI6]	2.07175	5.05324	3.76841e-05	0.000367905
ENSGALG00000004746		chr14	4514869	4516830	-	protein_coding	Uncharacterized protein [Source:UniProtKB/TrEMBL;Acc:E1BT65]	2.09568	2.97463	1.07545e-05	0.000123438
ENSGALG00000004972	MYO15A	chr14	5008968	5029591	+	protein_coding	myosin XVA [Source:HGNC Symbol;Acc:HGNC:7594]	4.48325	0.52424	0.000192724	0.00146574
ENSGALG00000005215	CACNA1H	chr14	5230050	5338554	-	protein_coding	Uncharacterized protein [Source:UniProtKB/TrEMBL;Acc:F1P435]	2.30692	1.96662	0.00509321	0.0220577
ENSGALG00000005258	SS5R	chr14	5610706	5611785	-	protein_coding	somatostatin receptor type 5 [Source:RefSeq peptide;Acc:NP_001020005]	3.08287	0.000710121	0.000714857	0.0044084
ENSGALG00000005411		chr14	6045113	6056878	-	protein_coding	Uncharacterized protein [Source:UniProtKB/TrEMBL;Acc:E1BQ93]	2.01827	-0.263941	0.00282384	0.0137655
ENSGALG00000027592	ERN2	chr14	6889933	6898661	-	protein_coding	endoplasmic reticulum to nucleus signaling 2 [Source:HGNC Symbol;Acc:HGNC:16942]	2.23807	3.13828	0.00503994	0.0218802
ENSGALG00000006202	SCNN1B	chr14	6949246	6957640	-	protein_coding	sodium channel, non voltage gated 1 beta subunit [Source:HGNC Symbol;Acc:HGNC:10600]	3.14932	2.04663	0.00886561	0.0346642
ENSGALG00000007070	OTOA	chr14	8746592	8776869	+	protein_coding	otoancorin [Source:HGNC Symbol;Acc:HGNC:16378]	4.66246	3.23652	0.000181931	0.00139624
ENSGALG00000023740	HBZ	chr14	12090645	12099745	+	protein_coding	Hemoglobin subunit pi [Source:UniProtKB/Swiss-Prot;Acc:P02007]	4.80696	0.903828	8.03777e-07	1.26162e-05
ENSGALG00000002535		chr14	13096738	13106562	+	protein_coding		3.21624	2.39971	0.000127898	0.00103864
ENSGALG00000028345	RHBDL1	chr14	13136531	13139108	+	protein_coding	rhomboid, veinlet-like 1 (Drosophila) [Source:HGNC Symbol;Acc:HGNC:10007]	2.69519	-0.114885	0.000115538	0.000953627
ENSGALG00000029047	TMEM204	chr14	13771539	13799490	-	protein_coding	transmembrane protein 204 [Source:HGNC Symbol;Acc:HGNC:14158]	2.74213	5.28516	3.92133e-10	1.13527e-08
ENSGALG00000020723	NOG2	chr14	14062585	14063118	-	protein_coding	noggin-2 precursor [Source:RefSeq peptide;Acc:NP_001034693]	2.81025	-0.0429082	0.00012644	0.00103092
ENSGALG00000001866	GPR151	chr14	14447489	14451837	-	protein_coding	G protein-coupled receptor 151 [Source:RefSeq peptide;Acc:NP_001122137]	3.81957	0.282951	0.00015781	0.00123736
ENSGALG00000027146	GPR139	chr14	14604690	14623162	+	protein_coding	G protein-coupled receptor 139 [Source:HGNC Symbol;Acc:HGNC:19995]	3.57763	1.043	0.00152549	0.00831576
ENSGALG00000001621	cldn5	chr15	694098	694748	-	protein_coding	claudin 5 [Source:RefSeq peptide;Acc:NP_989532]	2.50134	0.598615	0.00640137	0.0265757
ENSGALG00000002242	GALNT9	chr15	2342102	2458959	+	protein_coding	polypeptide N-acetylgalactosaminyltransferase 9 [Source:HGNC Symbol;Acc:HGNC:4131]	3.02841	3.83845	0.013528	0.0482696
ENSGALG00000004582	MYL2	chr15	6028493	6032632	-	protein_coding	myosin regulatory light chain 2A, cardiac muscle isoform [Source:RefSeq peptide;Acc:NP_001258858]	8.08971	4.67697	3.50464e-05	0.000344991
ENSGALG00000028177		chr15	6235770	6237893	+	protein_coding	Uncharacterized protein [Source:UniProtKB/TrEMBL;Acc:F1NFZ4]	2.51116	-0.165479	0.00175553	0.00930276
ENSGALG00000005994	DERL3	chr15	8010321	8014793	-	protein_coding	derlin 3 [Source:HGNC Symbol;Acc:HGNC:14236]	2.64264	5.24809	2.80433e-08	6.09846e-07
ENSGALG00000006053		chr15	8023820	8030876	+	protein_coding	Uncharacterized protein [Source:UniProtKB/TrEMBL;Acc:E1C4E5]	3.7899	0.257622	0.000102706	0.000864626
ENSGALG00000006320		chr15	8073585	8081073	+	protein_coding	Uncharacterized protein [Source:UniProtKB/TrEMBL;Acc:F1P492]	2.58747	-0.141185	0.00126464	0.0071414
ENSGALG00000006501	GGT5	chr15	8357677	8374452	+	protein_coding	gamma-glutamyltransferase 5 [Source:HGNC Symbol;Acc:HGNC:4260]	3.08479	4.94956	3.58318e-06	4.74741e-05
ENSGALG00000006642	ADORA2A	chr15	8481375	8491459	-	protein_coding	adenosine A2a receptor [Source:HGNC Symbol;Acc:HGNC:263]	6.17747	1.753	5.37974e-08	1.11867e-06
ENSGALG00000007116	CABP1	chr15	9206727	9233056	-	protein_coding	calcium binding protein 1 [Source:HGNC Symbol;Acc:HGNC:1384]	3.2867	0.132778	0.000407142	0.00273812
ENSGALG00000007376	CCDC60	chr15	9672623	9717861	-	protein_coding	coiled-coil domain containing 60 [Source:HGNC Symbol;Acc:HGNC:28610]	2.39916	-0.14015	0.00927382	0.0358762
ENSGALG00000007728		chr15	10110679	10115553	-	protein_coding	Uncharacterized protein [Source:UniProtKB/TrEMBL;Acc:F1NRZ9]	2.45074	4.84736	2.0238e-06	2.85133e-05
ENSGALG00000008250	TBX3	chr15	12207814	12219746	+	protein_coding	T-box transcription factor TBX3 [Source:RefSeq peptide;Acc:NP_001257807]	5.13539	2.49048	2.19961e-14	1.31644e-12
ENSGALG00000008337	SLC8B1	chr15	12584397	12587862	+	protein_coding	solute carrier family 8 (sodium/lithium/calcium exchanger), member B1 [Source:HGNC Symbol;Acc:HGNC:26175]	3.58824	0.8474	0.000173942	0.00134581
ENSGALG00000010153	CYP21A2	chr16	37924	41746	-	protein_coding	steroid 21-hydroxylase precursor [Source:RefSeq peptide;Acc:NP_001092828]	2.6971	0.0491635	0.000435987	0.00290468
ENSGALG00000000107	TRIM7.1	chr16	177447	186760	+	protein_coding	tripartite motif-containing protein 7 [Source:RefSeq peptide;Acc:NP_001092822]	2.29243	-0.209003	0.00144428	0.00796141
ENSGALG00000028399		chr16	247113	252747	-	protein_coding	Uncharacterized protein [Source:UniProtKB/TrEMBL;Acc:R4GJ99]	2.24518	2.54287	3.94831e-05	0.000383889
ENSGALG00000009090	UAP1L1	chr17	355265	371182	-	protein_coding	UDP-N-acetylglucosamine pyrophosphorylase 1 like 1 [Source:HGNC Symbol;Acc:HGNC:28082]	2.00128	4.58228	1.37006e-07	2.59165e-06
ENSGALG00000008898	GRIN1	chr17	1005919	1138144	-	protein_coding	glutamate [Source:RefSeq peptide;Acc:NP_996862]	2.12764	-0.19752	0.0132275	0.0474589
ENSGALG00000008881	RGS3	chr17	1365415	1417184	-	protein_coding	Gallus gallus regulator of G-protein signaling 3 (RGS3), transcript variant 2, mRNA. [Source:RefSeq mRNA;Acc:NM_001048051]	2.80387	5.52917	6.85719e-06	8.36966e-05
ENSGALG00000023909		chr17	1883863	1894238	-	protein_coding		3.324	0.0784493	0.000163066	0.00127063
ENSGALG00000007186	C9orf91	chr17	2510801	2518312	+	protein_coding	chromosome 9 open reading frame 91 [Source:HGNC Symbol;Acc:HGNC:24513]	5.79652	1.46508	3.32096e-06	4.45003e-05
ENSGALG00000007174	ChTL1A	chr17	2556497	2569744	-	protein_coding	tumor necrosis factor ligand superfamily member 15 [Source:RefSeq peptide;Acc:NP_001019749]	3.12436	2.04484	0.00272834	0.0133686
ENSGALG00000007003		chr17	3555764	3561244	+	protein_coding	Uncharacterized protein [Source:UniProtKB/TrEMBL;Acc:F1NGS6]	2.82461	-0.0806754	0.00118228	0.00675235
ENSGALG00000007001	TLR4	chr17	3566454	3571907	+	protein_coding	toll-like receptor 4 precursor [Source:RefSeq peptide;Acc:NP_001025864]	2.99333	-0.0303218	0.00104127	0.00608613
ENSGALG00000028236	PRRX2	chr17	5655699	5671868	+	protein_coding	paired related homeobox 2 [Source:HGNC Symbol;Acc:HGNC:21338]	8.10054	3.44729	1.2349e-25	3.99769e-23
ENSGALG00000023689	ASS1	chr17	5881860	5902534	+	protein_coding	argininosuccinate synthase [Source:RefSeq peptide;Acc:NP_001013413]	2.26534	5.33398	0.00408996	0.0183835
ENSGALG00000003895	PRDM12	chr17	5956541	5962675	+	protein_coding	PR domain containing 12 [Source:HGNC Symbol;Acc:HGNC:13997]	3.83662	2.1605	0.000402601	0.00271656
ENSGALG00000025516	gga-mir-1753	chr17	5958864	5958942	+	miRNA	gga-mir-1753 [Source:miRBase;Acc:MI0007494]	2.35357	-0.0977841	0.00155336	0.00843541
ENSGALG00000003852	LAMC3	chr17	6063756	6078732	+	protein_coding	laminin, gamma 3 [Source:HGNC Symbol;Acc:HGNC:6494]	5.13509	0.955403	8.06228e-06	9.67474e-05
ENSGALG00000028635	AIF1L	chr17	6079262	6091444	+	protein_coding	allograft inflammatory factor 1-like [Source:HGNC Symbol;Acc:HGNC:28904]	2.0782	5.43961	0.00121252	0.00690846
ENSGALG00000001434	STOM	chr17	8422956	8430634	-	protein_coding	stomatin [Source:HGNC Symbol;Acc:HGNC:3383]	2.11209	4.79158	0.000354235	0.00244227
ENSGALG00000001347	LHX6	chr17	8724589	8732994	-	protein_coding	LIM homeobox 6 [Source:HGNC Symbol;Acc:HGNC:21735]	2.29332	-0.209699	0.000416991	0.00279512
ENSGALG00000001124	LHX2	chr17	9224740	9243501	+	protein_coding	LIM homeobox 2 [Source:HGNC Symbol;Acc:HGNC:6594]	4.69223	0.722791	1.65237e-06	2.38948e-05
ENSGALG00000000940	ALC	chr17	10052537	10053722	-	protein_coding	ALC protein [Source:RefSeq peptide;Acc:NP_989771]	2.04197	-0.265993	0.00328216	0.0154549
ENSGALG00000000779	MYH13	chr18	297153	334809	-	protein_coding	myosin, heavy chain 13, skeletal muscle [Source:HGNC Symbol;Acc:HGNC:7571]	3.64169	0.196524	0.000221899	0.0016531
ENSGALG00000026090		chr18	1035597	1042814	+	protein_coding	Uncharacterized protein [Source:UniProtKB/TrEMBL;Acc:R4GG21]	2.07547	-0.252995	0.00267458	0.0131322
ENSGALG00000001404		chr18	2868764	2947619	-	protein_coding	Uncharacterized protein [Source:UniProtKB/TrEMBL;Acc:E1BX46]	2.93185	0.130553	0.00178537	0.00942317
ENSGALG00000001740	MGAT5B	chr18	4139174	4184210	-	protein_coding	mannosyl (alpha-1,6-)-glycoprotein beta-1,6-N-acetyl-glucosaminyltransferase, isozyme B [Source:HGNC Symbol;Acc:HGNC:24140]	4.21229	0.455438	4.40742e-07	7.41195e-06
ENSGALG00000001892	CYGB	chr18	4317487	4324555	+	protein_coding	cytoglobin [Source:RefSeq peptide;Acc:NP_001008789]	2.42802	0.563934	0.00613454	0.0256775
ENSGALG00000028892		chr18	4322901	4324052	-	protein_coding	Uncharacterized protein [Source:UniProtKB/TrEMBL;Acc:R4GI18]	2.20552	0.094201	0.00462341	0.0204078
ENSGALG00000003011	TOM1L1	chr18	5786851	5807221	+	protein_coding	target of myb1 (chicken)-like 1 [Source:HGNC Symbol;Acc:HGNC:11983]	3.95336	2.90745	0.00135875	0.00757496
ENSGALG00000004373	KCNJ16	chr18	8451086	8452375	+	protein_coding	potassium channel, inwardly rectifying subfamily J, member 16 [Source:HGNC Symbol;Acc:HGNC:6262]	6.62165	2.12259	8.73156e-07	1.35935e-05
ENSGALG00000004502	KIF19	chr18	9398568	9402518	+	protein_coding	kinesin family member 19 [Source:HGNC Symbol;Acc:HGNC:26735]	5.38499	1.16275	3.97008e-05	0.000385742
ENSGALG00000023354	FSCN2	chr18	9463625	9466414	-	protein_coding	fascin-2 [Source:RefSeq peptide;Acc:NP_001171209]	3.25358	0.0533172	0.000128417	0.00104108
ENSGALG00000013743	ENPP7	chr18	9916228	9920976	-	protein_coding	ectonucleotide pyrophosphatase/phosphodiesterase 7 [Source:HGNC Symbol;Acc:HGNC:23764]	2.34377	-0.19854	0.00099328	0.0058464
ENSGALG00000027789	RAB37	chr18	10703909	10709349	+	protein_coding	RAB37, member RAS oncogene family [Source:HGNC Symbol;Acc:HGNC:30268]	4.48206	0.601618	4.84399e-06	6.22162e-05
ENSGALG00000027415	GRIN2C	chr18	10769812	10777868	-	protein_coding	glutamate receptor, ionotropic, N-methyl D-aspartate 2C [Source:HGNC Symbol;Acc:HGNC:4587]	3.30598	0.0720782	0.000144335	0.00114727
ENSGALG00000007775	USH1G	chr18	10812362	10827732	-	protein_coding	Usher syndrome 1G (autosomal recessive) [Source:HGNC Symbol;Acc:HGNC:16356]	2.50211	-0.161347	0.0017516	0.00928539
ENSGALG00000022557	cldn3	chr19	714995	715639	-	protein_coding	claudin-3 [Source:RefSeq peptide;Acc:NP_989533]	4.27867	1.11823	7.99659e-06	9.604e-05
ENSGALG00000027569	CLDN4	chr19	721144	722360	+	protein_coding	claudin 4 [Source:HGNC Symbol;Acc:HGNC:2046]	2.45335	-0.0554568	0.000363327	0.00250132
ENSGALG00000001564	ATP2A3	chr19	3274476	3308472	+	protein_coding	sarcoplasmic/endoplasmic reticulum calcium ATPase 3 [Source:RefSeq peptide;Acc:NP_990222]	5.16369	2.41115	1.16499e-05	0.000132725
ENSGALG00000001617	CAMKK1	chr19	3364944	3409288	+	protein_coding	calcium/calmodulin-dependent protein kinase kinase 1, alpha [Source:HGNC Symbol;Acc:HGNC:1469]	2.03852	4.35308	0.00750928	0.0301812
ENSGALG00000001793	Myl2	chr19	3752431	3773359	-	protein_coding	myosin regulatory light chain 2B, cardiac muscle isoform [Source:RefSeq peptide;Acc:NP_001090995]	2.53748	-0.160568	0.00182228	0.00957804
ENSGALG00000021636		chr19	4100970	4106611	+	protein_coding	Uncharacterized protein [Source:UniProtKB/TrEMBL;Acc:F1NGM7]	2.35601	1.97248	0.00539338	0.0231256
ENSGALG00000001885		chr19	4176616	4178279	-	protein_coding	Uncharacterized protein [Source:UniProtKB/TrEMBL;Acc:F1NF48]	7.4832	2.87842	8.71254e-09	2.06148e-07
ENSGALG00000023921	UPK3B	chr19	4178760	4181450	-	protein_coding	uroplakin 3B [Source:HGNC Symbol;Acc:HGNC:21444]	2.29558	-0.210278	7.25176e-05	0.000648832
ENSGALG00000001926	HSPB1	chr19	4253518	4255722	-	protein_coding	heat shock protein beta-1 [Source:RefSeq peptide;Acc:NP_990621]	2.18768	3.88891	5.8922e-05	0.000540081
ENSGALG00000002186	UNC45B	chr19	4463010	4471724	-	protein_coding	unc-45 homolog B (C. elegans) [Source:HGNC Symbol;Acc:HGNC:14304]	5.74916	1.55077	5.59645e-05	0.000516294
ENSGALG00000021589	RTN4RL1	chr19	5465307	5466656	-	protein_coding	reticulon 4 receptor-like 1 [Source:HGNC Symbol;Acc:HGNC:21329]	3.89886	0.310273	9.17325e-05	0.000783416
ENSGALG00000026718	HIC1	chr19	5520666	5524129	+	protein_coding	Gallus gallus hypermethylated in cancer 1 (HIC1), mRNA. [Source:RefSeq mRNA;Acc:NM_205236]	2.76251	0.107653	0.00303209	0.0146008
ENSGALG00000004009	DHRS13	chr19	5879955	5882087	-	protein_coding	dehydrogenase/reductase (SDR family) member 13 [Source:HGNC Symbol;Acc:HGNC:28326]	3.81521	1.48717	2.42602e-05	0.000250953
ENSGALG00000004900	FAM101B	chr19	6991393	6994939	+	protein_coding	family with sequence similarity 101, member B [Source:HGNC Symbol;Acc:HGNC:28705]	4.23278	2.03218	5.55173e-08	1.1494e-06
ENSGALG00000023577	TBX2	chr19	7630833	7638493	-	protein_coding	T-box 2 [Source:HGNC Symbol;Acc:HGNC:11597]	2.50188	0.209817	0.00202618	0.0104266
ENSGALG00000000974	IGSF1	chr20	40715	45256	+	protein_coding	immunoglobulin superfamily member 1 [Source:RefSeq peptide;Acc:NP_001138698]	2.18399	-0.0694928	0.0121085	0.0442693
ENSGALG00000001786	GDF5	chr20	1438852	1442860	+	protein_coding	growth/differentiation factor 5 precursor [Source:RefSeq peptide;Acc:NP_989669]	2.05261	-0.256059	0.00439275	0.0195227
ENSGALG00000003550	ARHGAP40	chr20	4036301	4076622	-	protein_coding	Rho GTPase-activating protein 18-like [Source:RefSeq peptide;Acc:NP_001138488]	3.39662	3.72502	0.000222744	0.00165853
ENSGALG00000029089		chr20	5458592	5461795	+	protein_coding	Uncharacterized protein [Source:UniProtKB/TrEMBL;Acc:R4GG68]	2.50754	-0.16019	0.00107331	0.00624775
ENSGALG00000004508	EYA2	chr20	6012484	6104467	+	protein_coding	eyes absent homolog 2 [Source:RefSeq peptide;Acc:NP_990246]	2.40165	5.74728	6.37394e-06	7.86064e-05
ENSGALG00000005170	HRH3	chr20	8120601	8123051	-	protein_coding	histamine receptor H3 [Source:HGNC Symbol;Acc:HGNC:5184]	3.31787	0.0722174	0.00028536	0.00205182
ENSGALG00000005348	RBBP8NL	chr20	8309311	8320262	-	protein_coding	RBBP8 N-terminal like [Source:HGNC Symbol;Acc:HGNC:16144]	6.52347	2.03951	1.02019e-06	1.55751e-05
ENSGALG00000005352	GATA5	chr20	8368251	8377966	-	protein_coding	transcription factor GATA-5 [Source:RefSeq peptide;Acc:NP_990752]	3.58143	4.06915	0.000961318	0.00568411
ENSGALG00000005852	SRMS	chr20	9373970	9382871	-	protein_coding	src-related kinase lacking C-terminal regulatory tyrosine and N-terminal myristylation sites [Source:HGNC Symbol;Acc:HGNC:11298]	3.84119	0.281505	9.56662e-05	0.000812079
ENSGALG00000005932	MYT1	chr20	9447729	9504782	-	protein_coding	myelin transcription factor 1 [Source:HGNC Symbol;Acc:HGNC:7622]	6.32699	1.87659	1.12106e-05	0.000128157
ENSGALG00000028347	SDCBP2	chr20	10178536	10180514	+	protein_coding	syndecan binding protein (syntenin) 2 [Source:HGNC Symbol;Acc:HGNC:15756]	3.74126	0.240823	0.000131637	0.00106174
ENSGALG00000026890	ANGPT4	chr20	10237437	10245306	+	protein_coding	angiopoietin 4 [Source:HGNC Symbol;Acc:HGNC:487]	3.63097	1.90649	4.34987e-05	0.000416395
ENSGALG00000000017		chr20	10267361	10268205	+	protein_coding	Uncharacterized protein [Source:UniProtKB/TrEMBL;Acc:H9KYN4]	2.31597	0.123593	0.00139988	0.0077557
ENSGALG00000023636	REM1	chr20	10327399	10330347	+	protein_coding	RAS (RAD and GEM)-like GTP-binding 1 [Source:HGNC Symbol;Acc:HGNC:15922]	2.66456	1.14364	0.00557051	0.0237564
ENSGALG00000006210	Id1	chr20	10351641	10352379	+	protein_coding	DNA-binding protein inhibitor ID-1 [Source:RefSeq peptide;Acc:NP_989921]	2.68209	7.38475	8.06504e-25	2.29757e-22
ENSGALG00000006479	CCM2L	chr20	10446236	10449489	+	protein_coding	cerebral cavernous malformation 2-like [Source:HGNC Symbol;Acc:HGNC:16153]	3.90496	0.31133	0.000225194	0.00167327
ENSGALG00000006666	BPIFB7	chr20	10643158	10647278	-	protein_coding	protein TENP [Source:RefSeq peptide;Acc:NP_990357]	5.02525	3.98235	0.000478688	0.00315376
ENSGALG00000006679	BPIFB4	chr20	10663664	10668879	+	protein_coding	BPI fold containing family B, member 4 [Source:HGNC Symbol;Acc:HGNC:16179]	3.62902	0.195217	0.000212989	0.00159864
ENSGALG00000006693		chr20	10672579	10675472	+	protein_coding	Uncharacterized protein [Source:UniProtKB/TrEMBL;Acc:E1C0M7]	3.75482	0.375835	5.23988e-05	0.000488142
ENSGALG00000006775	TGM2	chr20	10714657	10723053	+	protein_coding	protein-glutamine gamma-glutamyltransferase 2 [Source:RefSeq peptide;Acc:NP_990779]	6.24372	1.81249	9.23052e-07	1.42913e-05
ENSGALG00000006832	WFDC2	chr20	10829801	10840153	+	protein_coding	WAP four-disulfide core domain 2 [Source:HGNC Symbol;Acc:HGNC:15939]	2.27411	1.58939	0.00211516	0.0107789
ENSGALG00000007543	Pgo2	chr20	11503875	11517756	+	protein_coding	Uncharacterized protein [Source:UniProtKB/TrEMBL;Acc:F1NSX1]	4.68742	1.15372	8.97169e-05	0.00076891
ENSGALG00000027260	MC3R	chr20	12405996	12406958	-	protein_coding	melanocortin 3 receptor [Source:HGNC Symbol;Acc:HGNC:6931]	2.47965	-0.167033	0.00129185	0.00727317
ENSGALG00000007772	CBLN4	chr20	12452387	12456928	+	protein_coding	cerebellin-4 precursor [Source:RefSeq peptide;Acc:NP_001072955]	5.98185	2.25504	1.41022e-05	0.000156809
ENSGALG00000007786	DOK5	chr20	12598230	12633483	-	protein_coding	docking protein 5 [Source:HGNC Symbol;Acc:HGNC:16173]	3.78323	6.03807	2.76942e-15	1.91494e-13
ENSGALG00000008018	SNAI1	chr20	14136361	14139739	-	protein_coding	snail homolog 1 [Source:RefSeq peptide;Acc:NP_990473]	3.39839	6.62049	1.77804e-08	3.96344e-07
ENSGALG00000000479	PADI3	chr21	129323	135282	-	protein_coding	protein-arginine deiminase type-3 [Source:RefSeq peptide;Acc:NP_990374]	3.55911	0.15055	0.000333478	0.00232453
ENSGALG00000001040	MEGF6	chr21	994531	1027576	+	protein_coding	multiple EGF-like-domains 6 [Source:HGNC Symbol;Acc:HGNC:3232]	3.00343	1.28628	0.00163752	0.00878195
ENSGALG00000001063	PRDM16	chr21	1036825	1239991	-	protein_coding	Uncharacterized protein [Source:UniProtKB/TrEMBL;Acc:F1NXT8]	2.95266	2.94236	6.23337e-07	1.00553e-05
ENSGALG00000001141	HES5	chr21	1432928	1434563	+	protein_coding	transcription factor HES-5 [Source:RefSeq peptide;Acc:NP_001012713]	2.88017	4.70532	0.00104964	0.00612496
ENSGALG00000001857	FAM132A	chr21	2478212	2493408	+	protein_coding	family with sequence similarity 132, member A [Source:HGNC Symbol;Acc:HGNC:32308]	4.17115	3.41619	0.00110088	0.00637438
ENSGALG00000002228	SAMD11	chr21	2919061	2959863	-	protein_coding	sterile alpha motif domain-containing protein 11 [Source:RefSeq peptide;Acc:NP_001026048]	3.08577	3.35222	9.34077e-06	0.000109326
ENSGALG00000002390	CA6	chr21	3231041	3238017	+	protein_coding	carbonic anhydrase VI [Source:HGNC Symbol;Acc:HGNC:1380]	2.53694	-0.0244876	0.0129131	0.0466011
ENSGALG00000002466	SLC2A5	chr21	3235858	3248083	-	protein_coding	solute carrier family 2 (facilitated glucose/fructose transporter), member 5 [Source:HGNC Symbol;Acc:HGNC:11010]	2.43858	-0.0858991	0.0104779	0.0394833
ENSGALG00000004102	C21H1orf158	chr21	5253356	5257720	-	protein_coding	uncharacterized protein LOC395744 [Source:RefSeq peptide;Acc:NP_990245]	2.44694	0.1301	0.0109793	0.0410174
ENSGALG00000000098	ANTXR1	chr22	148116	238186	-	protein_coding	anthrax toxin receptor 1 [Source:HGNC Symbol;Acc:HGNC:21014]	2.91189	-0.00535177	0.00126811	0.00715649
ENSGALG00000000120	BMP-10	chr22	276543	282395	+	protein_coding	bone morphogenetic protein 10 precursor [Source:RefSeq peptide;Acc:NP_001264975]	4.12239	0.376932	0.000308084	0.00217694
ENSGALG00000000132	ARHGAP25	chr22	291968	308523	-	protein_coding	rho GTPase-activating protein 25 [Source:RefSeq peptide;Acc:NP_001026054]	3.30559	0.462792	0.00984229	0.0375451
ENSGALG00000000365	NKX2-6	chr22	1163640	1164119	+	protein_coding	homeobox protein Nkx-2.6 [Source:RefSeq peptide;Acc:NP_990468]	4.94437	2.39964	0.000170632	0.00132235
ENSGALG00000001560	KCNU1	chr22	1989333	2026713	+	protein_coding	potassium channel, subfamily U, member 1 [Source:HGNC Symbol;Acc:HGNC:18867]	3.25756	0.0589536	0.000501985	0.0032842
ENSGALG00000003118	ADGRA2	chr22	2203023	2212432	+	protein_coding	adhesion G protein-coupled receptor A2 [Source:HGNC Symbol;Acc:HGNC:17849]	2.67055	0.623031	0.00281761	0.0137446
ENSGALG00000019018	ADRB3	chr22	2237794	2240084	-	protein_coding	adrenoceptor beta 3 [Source:HGNC Symbol;Acc:HGNC:288]	5.41476	1.18534	4.78356e-07	7.99731e-06
ENSGALG00000003209	NODAL	chr22	2253832	2256437	-	protein_coding	nodal growth differentiation factor [Source:HGNC Symbol;Acc:HGNC:7865]	2.22051	-0.22484	0.00248855	0.0123912
ENSGALG00000003349	TAPP2	chr22	2404254	2413653	+	protein_coding	pleckstrin homology domain-containing family A member 2 [Source:RefSeq peptide;Acc:NP_990029]	3.01681	1.27498	0.00673809	0.0277151
ENSGALG00000003594	chAnk1	chr22	2614341	2660633	-	protein_coding	Uncharacterized protein [Source:UniProtKB/TrEMBL;Acc:F1NJR5]	2.15942	-0.237351	0.00224336	0.0113623
ENSGALG00000028651		chr22	2753877	2755407	-	protein_coding	Uncharacterized protein [Source:UniProtKB/TrEMBL;Acc:R4GIN6]	2.48494	-0.167749	0.00131187	0.00736551
ENSGALG00000000509	AIM1L	chr23	188096	199912	+	protein_coding	absent in melanoma 1-like [Source:HGNC Symbol;Acc:HGNC:17295]	3.24923	2.25383	0.00739845	0.0298199
ENSGALG00000000720		chr23	1402269	1407058	+	protein_coding	Uncharacterized protein [Source:UniProtKB/TrEMBL;Acc:F1N9J3]	3.03123	-0.0167563	0.000666091	0.00414858
ENSGALG00000028785	MAP3K6	chr23	1930454	1936866	-	protein_coding	mitogen-activated protein kinase kinase kinase 6 [Source:HGNC Symbol;Acc:HGNC:6858]	3.28857	0.123927	8.57678e-05	0.000741759
ENSGALG00000001038	MAN1C1	chr23	2257731	2299072	-	protein_coding	mannosidase, alpha, class 1C, member 1 [Source:HGNC Symbol;Acc:HGNC:19080]	2.25084	2.59526	0.00265762	0.0130625
ENSGALG00000028258		chr23	2538761	2547184	+	protein_coding	Uncharacterized protein [Source:UniProtKB/TrEMBL;Acc:R4GHK4]	3.08612	0.517572	0.00501203	0.0217877
ENSGALG00000021658	PAFAH2	chr23	3186847	3190095	+	protein_coding	platelet-activating factor acetylhydrolase 2, 40kDa [Source:HGNC Symbol;Acc:HGNC:8579]	3.61124	2.11106	0.00054085	0.00348749
ENSGALG00000002532	GJA4	chr23	4398099	4400981	-	protein_coding	connexin 37 [Source:RefSeq peptide;Acc:NP_996867]	3.32793	0.693255	0.0038964	0.0176696
ENSGALG00000026836	COL16A1	chr23	4921631	4939423	-	protein_coding	collagen, type XVI, alpha 1 [Source:HGNC Symbol;Acc:HGNC:2193]	2.20429	0.912415	0.00110237	0.00637779
ENSGALG00000021593	HEYL	chr23	5435506	5440414	-	protein_coding	hes-related family bHLH transcription factor with YRPW motif-like [Source:HGNC Symbol;Acc:HGNC:4882]	2.28144	3.75206	1.24756e-05	0.00014081
ENSGALG00000000957	ESAM	chr24	289700	292570	+	protein_coding	endothelial cell adhesion molecule [Source:HGNC Symbol;Acc:HGNC:17474]	4.82893	0.796154	9.23845e-06	0.000108485
ENSGALG00000001129	KIRREL3	chr24	451348	687741	-	protein_coding	kin of IRRE like 3 (Drosophila) [Source:HGNC Symbol;Acc:HGNC:23204]	2.59091	2.08337	0.00107533	0.00625693
ENSGALG00000001161	FLI1	chr24	986189	1055149	+	protein_coding	Friend leukemia integration 1 transcription factor [Source:RefSeq peptide;Acc:NP_001026079]	3.25951	4.92751	8.4048e-06	9.99316e-05
ENSGALG00000025702	5S_rRNA	chr24	1029528	1029634	-	rRNA	5S ribosomal RNA [Source:RFAM;Acc:RF00001]	2.89712	0.984436	1.50064e-07	2.80513e-06
ENSGALG00000027176		chr24	2799490	2800146	+	protein_coding	Uncharacterized protein [Source:UniProtKB/TrEMBL;Acc:R4GJP7]	3.04295	-0.0215331	0.000472394	0.00311806
ENSGALG00000021375		chr24	2827734	2830433	+	protein_coding	Uncharacterized protein [Source:UniProtKB/TrEMBL;Acc:E1BSM4]	3.74606	0.229994	0.000203772	0.00153735
ENSGALG00000006469	ATP12A	chr24	2845500	2863118	-	protein_coding	potassium-transporting ATPase alpha chain 2 [Source:RefSeq peptide;Acc:NP_001026080]	3.68925	0.204984	0.000257258	0.00187436
ENSGALG00000006582		chr24	3282749	3322693	+	protein_coding	Uncharacterized protein [Source:UniProtKB/TrEMBL;Acc:F1P4L1]	2.08895	-0.00151686	0.011199	0.0417074
ENSGALG00000006584		chr24	3361189	3363063	+	protein_coding	Uncharacterized protein [Source:UniProtKB/TrEMBL;Acc:E1BUE1]	3.1543	0.118762	0.000332769	0.00232124
ENSGALG00000007815	ANKK1	chr24	5769724	5780497	-	protein_coding	ankyrin repeat and kinase domain containing 1 [Source:HGNC Symbol;Acc:HGNC:21027]	2.20944	-0.230519	0.00186131	0.00972221
ENSGALG00000026070		chr25	433336	437382	-	protein_coding	Uncharacterized protein [Source:UniProtKB/TrEMBL;Acc:R4GFB4]	2.90864	2.96068	0.00266198	0.0130749
ENSGALG00000029140	CRABP2	chr25	468703	470859	+	protein_coding	cellular retinoic acid binding protein 2 [Source:HGNC Symbol;Acc:HGNC:2339]	2.35019	3.20055	1.7507e-23	3.8964e-21
ENSGALG00000013232	RHBG	chr25	511571	515860	+	protein_coding	Rhesus blood group, B glycoprotein [Source:RefSeq peptide;Acc:NP_989698]	4.8152	0.795675	2.83771e-06	3.86059e-05
ENSGALG00000025817	NHLH1	chr25	1195012	1199650	+	protein_coding	helix-loop-helix protein 1 [Source:RefSeq peptide;Acc:NP_989452]	3.181	4.48439	0.00510831	0.0220895
ENSGALG00000018702		chr25	1585869	1586430	+	protein_coding	Uncharacterized protein [Source:UniProtKB/TrEMBL;Acc:H9L116]	2.56658	3.93318	5.84873e-07	9.5102e-06
ENSGALG00000022137	CRP	chr25	1674627	1675765	+	protein_coding	C-reactive protein precursor [Source:RefSeq peptide;Acc:NP_001034653]	3.86987	0.293035	4.3855e-06	5.67367e-05
ENSGALG00000000826	MAPK13	chr26	159809	170262	+	protein_coding	mitogen-activated protein kinase 13 [Source:HGNC Symbol;Acc:HGNC:6875]	2.1634	2.46037	0.011352	0.0421077
ENSGALG00000000742	PIM1	chr26	224386	227839	-	protein_coding	Pim-1 proto-oncogene, serine/threonine kinase [Source:HGNC Symbol;Acc:HGNC:8986]	2.62632	3.26904	7.23332e-09	1.74334e-07
ENSGALG00000026033	SYT2	chr26	661662	664656	+	protein_coding	synaptotagmin II [Source:HGNC Symbol;Acc:HGNC:11510]	2.61849	-0.139585	0.000922722	0.00549697
ENSGALG00000000313	TNNI1	chr26	774174	777490	+	protein_coding	troponin I type 1 (skeletal, slow) [Source:HGNC Symbol;Acc:HGNC:11945]	3.58596	4.34809	5.04978e-05	0.000474372
ENSGALG00000000309	LAD1	chr26	782938	787983	+	protein_coding	ladinin 1 [Source:HGNC Symbol;Acc:HGNC:6472]	3.53941	0.160072	0.000116182	0.000958253
ENSGALG00000000302	TNNT2	chr26	789217	797274	+	protein_coding	troponin T, cardiac muscle isoforms [Source:RefSeq peptide;Acc:NP_990780]	6.3976	4.81372	5.98747e-05	0.000548107
ENSGALG00000028721	LMOD1	chr26	1105423	1114192	+	protein_coding	leiomodin 1 (smooth muscle) [Source:HGNC Symbol;Acc:HGNC:6647]	4.30294	1.06752	0.000235136	0.00173718
ENSGALG00000000394	SLC6A17	chr26	1296239	1303356	+	protein_coding	solute carrier family 6 (neutral amino acid transporter), member 17 [Source:HGNC Symbol;Acc:HGNC:31399]	3.71811	0.227939	0.000297589	0.00211731
ENSGALG00000000437		chr26	1376304	1379433	+	protein_coding	embryonic pepsinogen precursor [Source:RefSeq peptide;Acc:NP_990385]	4.25968	0.48587	0.000151684	0.00119634
ENSGALG00000000834	RASSF5	chr26	2438015	2447837	+	protein_coding	Ras association (RalGDS/AF-6) domain family member 5 [Source:RefSeq peptide;Acc:NP_001008452]	2.37696	1.16369	0.00287878	0.0139854
ENSGALG00000001177	CD34	chr26	2670687	2678872	-	protein_coding	CD34 molecule [Source:HGNC Symbol;Acc:HGNC:1662]	4.57753	2.55515	0.000161805	0.00126149
ENSGALG00000001343	LAMB3	chr26	3056480	3075970	-	protein_coding	laminin, beta 3 [Source:HGNC Symbol;Acc:HGNC:6490]	2.81599	-0.0804011	0.000880776	0.00530701
ENSGALG00000028858		chr26	3087400	3091783	+	protein_coding	Uncharacterized protein [Source:UniProtKB/TrEMBL;Acc:R4GJF2]	3.13157	0.0125065	0.000293738	0.00209921
ENSGALG00000001369		chr26	3092512	3095075	+	protein_coding	Uncharacterized protein [Source:UniProtKB/TrEMBL;Acc:E1BZ22]	3.27092	0.132181	0.00187254	0.00977014
ENSGALG00000001373	TRAF3IP3	chr26	3097402	3106046	+	protein_coding	TRAF3 interacting protein 3 [Source:HGNC Symbol;Acc:HGNC:30766]	2.86927	-0.0677414	0.000934351	0.00555231
ENSGALG00000002082	AMPD1	chr26	3833687	3843675	-	protein_coding	adenosine monophosphate deaminase 1 [Source:HGNC Symbol;Acc:HGNC:468]	4.27142	1.22666	0.000544867	0.0035118
ENSGALG00000028489	PGC	chr26	4976148	4979037	-	protein_coding	progastricsin (pepsinogen C) [Source:HGNC Symbol;Acc:HGNC:8890]	2.1713	-0.190846	0.0136274	0.0485493
ENSGALG00000000371	CRHR1	chr27	2226991	2253136	+	protein_coding	corticotropin-releasing factor receptor 1 precursor [Source:RefSeq peptide;Acc:NP_989652]	6.10028	1.69454	6.83897e-06	8.35457e-05
ENSGALG00000024062	RPRML	chr27	2298589	2298924	-	protein_coding	reprimo-like [Source:HGNC Symbol;Acc:HGNC:32422]	2.71741	-0.108732	4.80714e-05	0.000453694
ENSGALG00000000382		chr27	2320559	2331493	+	protein_coding	Uncharacterized protein [Source:UniProtKB/TrEMBL;Acc:F1NXY3]	3.61846	0.171719	0.000194261	0.00147419
ENSGALG00000019797	PTH3R	chr27	2822027	2826383	-	protein_coding	Uncharacterized protein [Source:UniProtKB/TrEMBL;Acc:E1C1Q7]	2.46609	-0.0879973	0.00993217	0.0377969
ENSGALG00000027677	DLX3	chr27	2989225	2994344	+	protein_coding	distal-less homeobox 3 [Source:RefSeq peptide;Acc:NP_990135]	3.70612	1.44217	9.59645e-10	2.63884e-08
ENSGALG00000027311	NGFR	chr27	3204183	3219385	-	protein_coding	tumor necrosis factor receptor superfamily member 16 precursor [Source:RefSeq peptide;Acc:NP_001139605]	4.49215	4.11306	6.7211e-14	3.66802e-12
ENSGALG00000027305	SKAP1	chr27	3711055	3815879	+	protein_coding	src kinase associated phosphoprotein 1 [Source:HGNC Symbol;Acc:HGNC:15605]	3.70434	0.221516	0.000202374	0.00153058
ENSGALG00000028797	PPP1R1B	chr27	4207961	4211606	+	protein_coding	protein phosphatase 1, regulatory (inhibitor) subunit 1B [Source:HGNC Symbol;Acc:HGNC:9287]	3.15196	3.23518	1.20531e-05	0.000136474
ENSGALG00000027281	PNMT	chr27	4232205	4234052	+	protein_coding	phenylethanolamine N-methyltransferase [Source:HGNC Symbol;Acc:HGNC:9160]	2.19432	0.157239	0.0139803	0.0495485
ENSGALG00000028806	GRB7	chr27	4249889	4255758	+	protein_coding	growth factor receptor-bound protein 7 [Source:HGNC Symbol;Acc:HGNC:4567]	4.76364	0.760448	3.11868e-05	0.000310865
ENSGALG00000024449	RAMP2	chr27	5030186	5032034	+	protein_coding	receptor activity-modifying protein 2 precursor [Source:RefSeq peptide;Acc:NP_001099080]	3.28535	1.25333	0.00264774	0.0130274
ENSGALG00000026845		chr28	881361	882992	-	protein_coding	Uncharacterized protein [Source:UniProtKB/TrEMBL;Acc:R4GFK2]	2.06571	0.152527	0.0135156	0.0482617
ENSGALG00000000722		chr28	912530	918361	+	protein_coding	Amino acid transporter [Source:UniProtKB/TrEMBL;Acc:F1N9I8]	2.74141	-0.101643	0.0009779	0.00577018
ENSGALG00000001544	ADAMTS10	chr28	1745352	1791963	-	protein_coding	ADAM metallopeptidase with thrombospondin type 1 motif, 10 [Source:HGNC Symbol;Acc:HGNC:13201]	2.74094	0.686227	0.000737042	0.00452519
ENSGALG00000000806	LINGO3	chr28	1904829	1919422	+	protein_coding	leucine rich repeat and Ig domain containing 3 [Source:HGNC Symbol;Acc:HGNC:21206]	2.99688	0.515098	0.0109895	0.0410421
ENSGALG00000000819		chr28	1954074	1955458	+	protein_coding	Uncharacterized protein [Source:UniProtKB/TrEMBL;Acc:E1BZQ2]	2.98559	-0.0354169	0.000248158	0.00181456
ENSGALG00000001171	SEMA6B	chr28	2496338	2502634	-	protein_coding	sema domain, transmembrane domain (TM), and cytoplasmic domain, (semaphorin) 6B [Source:HGNC Symbol;Acc:HGNC:10739]	2.44574	2.86839	0.000509179	0.00332085
ENSGALG00000026241	GRIN3B	chr28	2806107	2810896	+	protein_coding	glutamate receptor, ionotropic, N-methyl-D-aspartate 3B [Source:HGNC Symbol;Acc:HGNC:16768]	2.78592	1.99207	0.00112948	0.00650031
ENSGALG00000002453	ABCA7	chr28	2822969	2834381	-	protein_coding	ATP-binding cassette, sub-family A (ABC1), member 7 [Source:HGNC Symbol;Acc:HGNC:37]	3.7081	0.190409	0.000125399	0.00102477
ENSGALG00000003253	ATP8B1	chrZ	334046	366833	+	protein_coding	ATPase, class I, type 8B, member 1 [Source:RefSeq peptide;Acc:NP_001264704]	2.97086	2.76287	0.00993182	0.0377969
ENSGALG00000002898	ALPK2	chrZ	767645	796574	-	protein_coding	alpha-kinase 2 [Source:HGNC Symbol;Acc:HGNC:20565]	3.96034	2.6446	0.00841277	0.0332035
ENSGALG00000025954	RAX1	chrZ	918774	923060	-	protein_coding	retinal homeobox protein Rx2 [Source:RefSeq peptide;Acc:NP_001230653]	3.12395	0.0548714	0.000702185	0.00434111
ENSGALG00000002712	LIPG	chrZ	1060883	1069738	-	protein_coding	lipase, endothelial [Source:HGNC Symbol;Acc:HGNC:6623]	2.65215	4.63928	0.000781478	0.00477127
ENSGALG00000018499		chrZ	6016209	6212212	+	protein_coding	Uncharacterized protein [Source:UniProtKB/TrEMBL;Acc:E1C131]	2.36026	1.72199	0.00367255	0.0169075
ENSGALG00000026884	PINLYP	chrZ	7020206	7022821	-	protein_coding	phospholipase A2 inhibitor and LY6/PLAUR domain containing [Source:HGNC Symbol;Acc:HGNC:44206]	2.36984	-0.191386	0.00198042	0.010227
ENSGALG00000002452	AQP3	chrZ	7053682	7068826	-	protein_coding	aquaporin 3 (Gill blood group) [Source:HGNC Symbol;Acc:HGNC:636]	2.85267	-0.0705465	0.00123954	0.00702866
ENSGALG00000005812		chrZ	7480622	7495980	-	protein_coding	Uncharacterized protein [Source:UniProtKB/TrEMBL;Acc:E1C3D0]	3.96525	1.31278	0.000945101	0.00559984
ENSGALG00000028140	CNTFR	chrZ	7993514	8162224	+	protein_coding	Ciliary neurotrophic factor receptor subunit alpha [Source:UniProtKB/Swiss-Prot;Acc:P51641]	3.30259	3.20861	5.30307e-07	8.74271e-06
ENSGALG00000027630	NPR2	chrZ	8953621	8966661	-	protein_coding	natriuretic peptide receptor 2 [Source:HGNC Symbol;Acc:HGNC:7944]	2.79308	2.74695	1.83071e-06	2.6234e-05
ENSGALG00000027785	CCBE1	chrZ	9157781	9247668	-	protein_coding	collagen and calcium binding EGF domains 1 [Source:HGNC Symbol;Acc:HGNC:29426]	3.81775	2.39181	0.00204109	0.0104806
ENSGALG00000027887		chrZ	10228700	10246653	-	protein_coding	Uncharacterized protein [Source:UniProtKB/TrEMBL;Acc:R4GKL8]	3.06897	3.29546	0.00182877	0.00959097
ENSGALG00000014835	C7	chrZ	12795475	12817485	+	protein_coding	complement component 7 [Source:HGNC Symbol;Acc:HGNC:1346]	6.83375	2.27186	3.04005e-05	0.000305162
ENSGALG00000014872	FGF10	chrZ	13833652	13891525	-	protein_coding	fibroblast growth factor 10 precursor [Source:RefSeq peptide;Acc:NP_990027]	6.63169	3.30695	1.19148e-08	2.73732e-07
ENSGALG00000014884	ISL1	chrZ	15002784	15016470	+	protein_coding	Insulin gene enhancer protein ISL-1 [Source:UniProtKB/Swiss-Prot;Acc:P50211]	7.43521	6.12999	3.47485e-13	1.68928e-11
ENSGALG00000014908	FST	chrZ	15930691	15938408	+	protein_coding	Follistatin [Source:UniProtKB/Swiss-Prot;Acc:Q90844]	2.94829	5.58037	0.00483328	0.0211571
ENSGALG00000027707	ESM1	chrZ	16485064	16493920	-	protein_coding	endothelial cell-specific molecule 1 [Source:HGNC Symbol;Acc:HGNC:3466]	3.91892	0.312211	0.000288669	0.00207039
ENSGALG00000014727	PDE4D	chrZ	18112317	18254795	-	protein_coding	phosphodiesterase 4D, cAMP-specific [Source:HGNC Symbol;Acc:HGNC:8783]	3.06564	3.08478	9.70298e-06	0.000113008
ENSGALG00000004339	PDE8B	chrZ	23069196	23143219	-	protein_coding	phosphodiesterase 8B [Source:HGNC Symbol;Acc:HGNC:8794]	3.80525	0.763513	0.000787208	0.00480213
ENSGALG00000023379	F2RL2	chrZ	23350633	23353611	+	protein_coding	coagulation factor II (thrombin) receptor-like 2 [Source:HGNC Symbol;Acc:HGNC:3539]	3.22212	2.11193	3.28195e-07	5.67332e-06
ENSGALG00000014958	ANKDD1B	chrZ	23704323	23726114	-	protein_coding	ankyrin repeat and death domain containing 1B [Source:HGNC Symbol;Acc:HGNC:32525]	2.50398	-0.0266124	0.00960956	0.0368647
ENSGALG00000014944	GCNT4	chrZ	23948263	23965346	+	protein_coding	glucosaminyl (N-acetyl) transferase 4, core 2 [Source:HGNC Symbol;Acc:HGNC:17973]	6.10997	1.68912	1.00997e-06	1.54689e-05
ENSGALG00000026790	DMRT2	chrZ	25902813	25905855	+	protein_coding	doublesex and mab-3 related transcription factor 2 [Source:HGNC Symbol;Acc:HGNC:2935]	3.379	0.0921728	0.000324946	0.00227558
ENSGALG00000005426	FREM1	chrZ	31576518	31643574	-	protein_coding	FRAS1 related extracellular matrix 1 [Source:HGNC Symbol;Acc:HGNC:23399]	2.582	3.12771	0.006301	0.0262508
ENSGALG00000015145	TMC1	chrZ	35666936	35725728	+	protein_coding	transmembrane channel-like protein 1 [Source:RefSeq peptide;Acc:NP_001006580]	2.65877	1.0101	0.00521362	0.0224494
ENSGALG00000015164	PCSK5	chrZ	36922222	37183206	+	protein_coding	proprotein convertase subtilisin/kexin type 5 [Source:HGNC Symbol;Acc:HGNC:8747]	2.28615	5.02163	0.000176297	0.0013596
ENSGALG00000015176	GNA14	chrZ	37568752	37598066	-	protein_coding	guanine nucleotide binding protein (G protein), alpha 14 [Source:HGNC Symbol;Acc:HGNC:4382]	3.93393	1.19348	9.84863e-05	0.000832545
ENSGALG00000012594	NTRK2	chrZ	40148867	40355175	+	protein_coding	neurotrophic tyrosine kinase, receptor, type 2 [Source:HGNC Symbol;Acc:HGNC:8032]	4.17365	0.446415	0.000152119	0.0011991
ENSGALG00000005323	DIRAS2	chrZ	43855478	43871400	-	protein_coding	DIRAS family, GTP-binding RAS-like 2 [Source:HGNC Symbol;Acc:HGNC:19323]	6.17295	1.75137	2.62406e-06	3.61132e-05
ENSGALG00000000151	ADAMTS19	chrZ	45146955	45309166	-	protein_coding	ADAM metallopeptidase with thrombospondin type 1 motif, 19 [Source:HGNC Symbol;Acc:HGNC:17111]	3.33727	4.34539	8.34178e-06	9.95145e-05
ENSGALG00000015290	LIX1	chrZ	51375633	51406317	+	protein_coding	Protein limb expression 1 [Source:UniProtKB/Swiss-Prot;Acc:Q8UVV7]	2.7949	2.73281	0.00802431	0.031918
ENSGALG00000015332	CPLX1	chrZ	52082066	52346243	+	protein_coding	complexin 1 [Source:HGNC Symbol;Acc:HGNC:2309]	3.49271	0.139048	5.15022e-05	0.000481995
ENSGALG00000015382	CHRNA6	chrZ	53426451	53435522	+	protein_coding	neuronal acetylcholine receptor subunit alpha-6 precursor [Source:RefSeq peptide;Acc:NP_990695]	2.8525	-0.0731451	0.000891833	0.00536003
ENSGALG00000015422	NRG1	chrZ	53782385	54246036	-	protein_coding	Pro-neuregulin-1, membrane-bound isoform Neuregulin-1 [Source:UniProtKB/Swiss-Prot;Acc:Q05199]	3.35013	1.00896	0.00175775	0.00931102
ENSGALG00000014645	MEF2C	chrZ	60141410	60260421	+	protein_coding	Uncharacterized protein [Source:UniProtKB/TrEMBL;Acc:E1C5C0]	2.29105	4.37278	2.07078e-07	3.73843e-06
ENSGALG00000023094		chrZ	60288949	60289831	+	protein_coding	Uncharacterized protein [Source:UniProtKB/TrEMBL;Acc:E1C5F7]	2.90779	-0.0556367	0.000163975	0.00127701
ENSGALG00000015630	EDIL3	chrZ	61983370	62255549	+	protein_coding	EGF-like repeats and discoidin I-like domains 3 [Source:HGNC Symbol;Acc:HGNC:3173]	4.18772	0.74007	0.000125389	0.00102477
ENSGALG00000015627	HAPLN1	chrZ	62344745	62440821	+	protein_coding	Hyaluronan and proteoglycan link protein 1 [Source:UniProtKB/Swiss-Prot;Acc:P07354]	2.92261	6.784	3.76496e-15	2.56594e-13
ENSGALG00000015572	CCDC125	chrZ	63971581	63984248	-	protein_coding	coiled-coil domain containing 125 [Source:HGNC Symbol;Acc:HGNC:28924]	4.96221	2.37338	6.6915e-05	0.000604016
ENSGALG00000015551	GRIN3A	chrZ	64830090	64898868	+	protein_coding	glutamate receptor, ionotropic, N-methyl-D-aspartate 3A [Source:HGNC Symbol;Acc:HGNC:16767]	4.80598	0.787311	7.80777e-06	9.41692e-05
ENSGALG00000027345	SLC46A2	chrZ	65673926	65679018	+	protein_coding	solute carrier family 46, member 2 [Source:HGNC Symbol;Acc:HGNC:16055]	2.28134	-0.211008	0.00166234	0.00888162
ENSGALG00000015729	LPAR1	chrZ	66635458	66700595	-	protein_coding	lysophosphatidic acid receptor 1 [Source:RefSeq peptide;Acc:NP_001108554]	2.21715	5.27564	0.000232356	0.00171842
ENSGALG00000001869	LINGO2	chrZ	68667026	68668846	-	protein_coding	leucine rich repeat and Ig domain containing 2 [Source:HGNC Symbol;Acc:HGNC:21207]	4.9034	0.848843	1.56772e-05	0.000172437
ENSGALG00000016431	Pax5	chrZ	81615205	81720849	+	protein_coding	paired box protein Pax-5 [Source:RefSeq peptide;Acc:NP_989755]	2.57909	-0.141759	0.00163723	0.00878195
ENSGALG00000028349		chr1_AADN03009259_random	9768	12557	-	protein_coding	Uncharacterized protein [Source:UniProtKB/TrEMBL;Acc:R4GI23]	2.33029	-0.140196	0.00374341	0.0171837
ENSGALG00000022940	FOXC2	chr2_JH375162_random	3207	4643	+	protein_coding	Gallus gallus forkhead box C2 (MFH-1, mesenchyme forkhead 1) (FOXC2), mRNA. [Source:RefSeq mRNA;Acc:NM_205138]	4.49766	1.48758	1.60328e-08	3.61348e-07
ENSGALG00000002215		chr11_AADN03010444_random	10628	19882	+	protein_coding	Uncharacterized protein [Source:UniProtKB/TrEMBL;Acc:F1NV84]	2.57318	1.20256	0.00298603	0.0144131
ENSGALG00000007458	HBZ	chr14_AADN03010587_random	7843	9971	+	protein_coding	Hemoglobin subunit pi [Source:UniProtKB/Swiss-Prot;Acc:P02007]	4.20318	0.45266	2.14119e-07	3.84603e-06
ENSGALG00000007468	HBAA	chr14_AADN03010595_random	5125	5931	-	protein_coding	Gallus gallus hemoglobin, alpha 1 (HBAA), mRNA. [Source:RefSeq mRNA;Acc:NM_001004376]	4.06785	0.387939	6.35382e-07	1.02149e-05
ENSGALG00000007463	HBAD	chr14_AADN03010595_random	8017	9433	-	protein_coding	Gallus gallus alpha-D-globin (HBAD), mRNA. [Source:RefSeq mRNA;Acc:NM_001004375]	3.02249	-0.0217836	8.25595e-05	0.000718374
ENSGALG00000005152	TRPV4	chr15_JH375192_random	13889	16051	+	protein_coding	Gallus gallus transient receptor potential cation channel, subfamily V, member 4 (TRPV4), mRNA. [Source:RefSeq mRNA;Acc:NM_204692]	2.72003	0.33319	0.0134438	0.0480644
ENSGALG00000007197		chr18_AADN03010814_random	3080	4087	-	protein_coding	Gallus gallus uncharacterized LOC422090 (LOC422090), mRNA. [Source:RefSeq mRNA;Acc:NM_001006423]	2.40469	0.672625	0.00194009	0.01006
ENSGALG00000024396	NEUROD4	chrLGE22C19W28_E50C23	460147	461139	-	protein_coding	neurogenic differentiation factor 4 [Source:RefSeq peptide;Acc:NP_990407]	2.96364	-0.0401638	0.000323851	0.00226903
ENSGALG00000012169	KRT8	chrLGE22C19W28_E50C23	543750	550149	+	protein_coding	keratin 8, type II [Source:HGNC Symbol;Acc:HGNC:6446]	2.34595	4.45313	0.000604537	0.00382542
ENSGALG00000018666	KRT4	chrLGE22C19W28_E50C23	558727	563179	+	protein_coding	keratin 4, type II [Source:HGNC Symbol;Acc:HGNC:6441]	3.79122	0.256403	0.000117645	0.000966957
ENSGALG00000028089		chrLGE22C19W28_E50C23	657674	663371	+	protein_coding	Uncharacterized protein [Source:UniProtKB/TrEMBL;Acc:R4GGI4]	3.66238	0.264125	4.23994e-06	5.51038e-05
ENSGALG00000018947	KRT5	chrLGE22C19W28_E50C23	667141	673450	+	protein_coding	keratin, type II cytoskeletal 5 [Source:RefSeq peptide;Acc:NP_001001195]	2.6202	-0.00862576	0.000702867	0.00434345
ENSGALG00000010250		chrLGE22C19W28_E50C23	713333	717769	-	protein_coding	Uncharacterized protein [Source:UniProtKB/TrEMBL;Acc:H9KZP6]	3.85075	4.70372	6.5957e-06	8.10606e-05
ENSGALG00000002720	AQP5	chrLGE22C19W28_E50C23	831420	835163	+	protein_coding	aquaporin 5 [Source:HGNC Symbol;Acc:HGNC:638]	2.00048	-0.269562	0.00520778	0.0224311
ENSGALG00000026616	KRT78	chrLGE22C19W28_N03011265_random	21	5724	+	protein_coding	keratin 78, type II [Source:HGNC Symbol;Acc:HGNC:28926]	3.63475	5.96428	0.000232334	0.00171842
ENSGALG00000026620		chrUn_AADN03014167	710	4428	-	protein_coding	Uncharacterized protein [Source:UniProtKB/TrEMBL;Acc:R4GFL5]	2.07716	-0.10305	0.0123082	0.0448039
ENSGALG00000026183		chrUn_AADN03014486	21	984	+	protein_coding	Uncharacterized protein [Source:UniProtKB/TrEMBL;Acc:R4GII0]	2.07136	0.0509034	0.00196341	0.010155
ENSGALG00000027075	RAB25	chrUn_AADN03014764	578	1726	-	protein_coding	RAB25, member RAS oncogene family [Source:HGNC Symbol;Acc:HGNC:18238]	2.11113	-0.247161	0.0023839	0.011948
ENSGALG00000026439		chrUn_AADN03014841	2	1115	-	protein_coding	Uncharacterized protein [Source:UniProtKB/TrEMBL;Acc:R4GGR7]	2.14836	0.995671	5.9132e-07	9.59312e-06
ENSGALG00000025744		chrUn_AADN03016787	596	1374	-	protein_coding	Uncharacterized protein [Source:UniProtKB/TrEMBL;Acc:R4GF85]	3.60384	0.659636	0.000754304	0.0046232
ENSGALG00000022619	ZNF541	chrUn_AADN03017309	21	9777	-	protein_coding	zinc finger protein 541 [Source:HGNC Symbol;Acc:HGNC:25294]	2.26072	0.0866935	0.00308215	0.0147521
ENSGALG00000012531		chrUn_AADN03018760	360	10879	+	protein_coding	Uncharacterized protein [Source:UniProtKB/TrEMBL;Acc:H9KZV9]	2.99906	-0.0270848	0.000373493	0.00255035
ENSGALG00000001305		chrUn_AADN03019707	616	9422	-	protein_coding	Linker for activation of T-cells family member 2 [Source:UniProtKB/Swiss-Prot;Acc:Q5S7W5]	2.42693	0.00679257	0.00760357	0.0304742
ENSGALG00000026611	CYP4F22	chrUn_AADN03027099	283	5104	-	protein_coding	cytochrome P450, family 4, subfamily F, polypeptide 22 [Source:HGNC Symbol;Acc:HGNC:26820]	2.12867	0.889566	0.00210035	0.0107077
ENSGALG00000026510	FCER2	chrUn_JH375454	245	5080	+	protein_coding	Fc fragment of IgE, low affinity II, receptor for (CD23) [Source:HGNC Symbol;Acc:HGNC:3612]	2.19781	-0.23158	0.00230109	0.0115942
ENSGALG00000022316		chrUn_JH375454	5895	10036	+	protein_coding	Uncharacterized protein [Source:UniProtKB/TrEMBL;Acc:H9L2G9]	3.04155	0.45281	0.00646245	0.0267653
ENSGALG00000014634	PMEL	chrUn_JH375501	21	4308	-	protein_coding	melanocyte protein PMEL precursor [Source:RefSeq peptide;Acc:NP_990443]	2.32279	1.68865	0.000664928	0.00414315
ENSGALG00000027089	ANKLE1	chrUn_JH375512	9363	12559	+	protein_coding	ankyrin repeat and LEM domain containing 1 [Source:HGNC Symbol;Acc:HGNC:26812]	2.43304	2.16456	2.86978e-05	0.000289909
ENSGALG00000027694		chrUn_JH375515	21	4305	+	protein_coding	Uncharacterized protein [Source:UniProtKB/TrEMBL;Acc:R4GHK2]	3.20743	2.24788	0.000374253	0.00255432
ENSGALG00000028404	GPR182	chrUn_JH375545	1074	2171	-	protein_coding	G protein-coupled receptor 182 [Source:HGNC Symbol;Acc:HGNC:13708]	2.39132	-0.187292	0.000695441	0.00430129
ENSGALG00000027933	RDH5	chrUn_JH375638	3251	6090	+	protein_coding	11-cis retinol dehydrogenase precursor [Source:RefSeq peptide;Acc:NP_990044]	2.14395	2.0136	4.71429e-24	1.11917e-21
ENSGALG00000026147	PLVAP	chrUn_JH375640	2147	5383	-	protein_coding	plasmalemma vesicle associated protein [Source:HGNC Symbol;Acc:HGNC:13635]	2.77654	0.256745	0.000142117	0.0011309
ENSGALG00000027676		chrUn_JH376001	4459	6632	-	protein_coding	Uncharacterized protein [Source:UniProtKB/TrEMBL;Acc:R4GJ88]	3.64117	0.197718	5.17147e-05	0.000483349
ENSGALG00000022280		chrUn_JH376151	5010	6537	-	protein_coding	Uncharacterized protein [Source:UniProtKB/TrEMBL;Acc:H9L2D3]	2.53288	-0.157338	0.000522269	0.00339225
ENSGALG00000026282	ANKRD13D	chrUn_JH376180	108204	110911	+	protein_coding	ankyrin repeat domain 13 family, member D [Source:HGNC Symbol;Acc:HGNC:27880]	2.7554	2.92165	4.20773e-05	0.000405514
ENSGALG00000028616	CELSR2	chrUn_JH376248	65	10958	-	protein_coding	cadherin, EGF LAG seven-pass G-type receptor 2 [Source:HGNC Symbol;Acc:HGNC:3231]	2.49574	-0.164238	0.00086	0.00519061
ENSGALG00000026345	GMIP	chrUn_JH376279	70611	89346	+	protein_coding	GEM interacting protein [Source:HGNC Symbol;Acc:HGNC:24852]	5.38499	2.08908	3.7127e-05	0.000362963
ENSGALG00000026173		chrUn_JH376336	7697	9124	+	protein_coding	Gallus gallus NK-lysin (LOC693257), mRNA. [Source:RefSeq mRNA;Acc:NM_001044680]	2.02203	4.12844	1.46845e-05	0.000162649
ENSGALG00000027495	LRRC16B	chrUn_JH376349	36793	55599	-	protein_coding	leucine rich repeat containing 16B [Source:HGNC Symbol;Acc:HGNC:20272]	2.30283	1.51754	7.59742e-05	0.000674253
ENSGALG00000028531	MTMR12	chr1	533348	534498	-	protein_coding	myotubularin related protein 12 [Source:HGNC Symbol;Acc:HGNC:18191]	-2.7545	-0.232213	2.58633e-06	3.56974e-05
ENSGALG00000020819		chr1	875595	881843	-	protein_coding	Uncharacterized protein [Source:UniProtKB/TrEMBL;Acc:F1NLH2]	-3.53958	-0.143977	3.60729e-09	9.0942e-08
ENSGALG00000008048	CPA2	chr1	902989	909381	+	protein_coding	carboxypeptidase A2 precursor [Source:RefSeq peptide;Acc:NP_001244143]	-3.65821	-0.32254	2.66179e-18	2.80848e-16
ENSGALG00000026622		chr1	4017316	4052368	+	protein_coding	transmembrane protein 110-like [Source:RefSeq peptide;Acc:NP_001026013]	-2.91393	3.70613	1.62503e-07	3.0022e-06
ENSGALG00000006576	GRM3	chr1	7521678	7592555	-	protein_coding	glutamate receptor, metabotropic 3 [Source:HGNC Symbol;Acc:HGNC:4595]	-2.6024	2.40079	0.000862069	0.0052009
ENSGALG00000023801		chr1	7629906	7723748	+	protein_coding	Uncharacterized protein [Source:UniProtKB/TrEMBL;Acc:E1BUJ7]	-2.81443	0.347008	5.85217e-06	7.28657e-05
ENSGALG00000008509	SEMA3E	chr1	9325096	9459193	+	protein_coding	semaphorin-3E precursor [Source:RefSeq peptide;Acc:NP_989573]	-2.28106	2.56493	7.88473e-05	0.000694207
ENSGALG00000013399	CELSR1	chr1	15539606	15697582	-	protein_coding	cadherin, EGF LAG seven-pass G-type receptor 1 [Source:HGNC Symbol;Acc:HGNC:1850]	-2.27602	2.6058	0.000193911	0.00147231
ENSGALG00000008554	IL17REL	chr1	19824030	19859442	-	protein_coding	interleukin 17 receptor E-like [Source:HGNC Symbol;Acc:HGNC:33808]	-2.63285	4.2263	8.64241e-05	0.000746528
ENSGALG00000008560	MLC1	chr1	19873600	19889970	-	protein_coding	megalencephalic leukoencephalopathy with subcortical cysts 1 [Source:HGNC Symbol;Acc:HGNC:17082]	-4.18866	2.79991	5.71216e-08	1.17804e-06
ENSGALG00000005013		chr1	19992697	19993437	-	protein_coding	Tetraspanin [Source:UniProtKB/TrEMBL;Acc:F1P219]	-2.17304	-0.248886	5.61574e-05	0.000517739
ENSGALG00000009393	CAV1	chr1	24999077	25013429	-	protein_coding	caveolin-1 [Source:RefSeq peptide;Acc:NP_001099134]	-2.67153	-0.00416252	4.44392e-05	0.000423085
ENSGALG00000009514	NRCAM	chr1	28525499	28668231	+	protein_coding	neuronal cell adhesion molecule [Source:HGNC Symbol;Acc:HGNC:7994]	-2.48329	4.21688	0.000136861	0.00109458
ENSGALG00000009730	SLC38A4	chr1	31044183	31064734	-	protein_coding	sodium-coupled neutral amino acid transporter 4 [Source:RefSeq peptide;Acc:NP_001186478]	-3.03557	-0.160466	4.15774e-06	5.42334e-05
ENSGALG00000027213	ALX1	chr1	41746969	41769781	+	protein_coding	ALX homeobox 1 [Source:HGNC Symbol;Acc:HGNC:1494]	-2.46877	3.70449	8.28038e-06	9.91152e-05
ENSGALG00000027192	NTS	chr1	42055609	42070038	+	protein_coding	neurotensin/neuromedin N precursor [Source:RefSeq peptide;Acc:NP_001264289]	-2.15039	0.808814	0.00152387	0.0083101
ENSGALG00000011594	FXR	chr1	47156727	47195707	+	protein_coding	bile acid receptor [Source:RefSeq peptide;Acc:NP_989444]	-4.11267	0.188929	5.31579e-09	1.30324e-07
ENSGALG00000011614	ANO4	chr1	47292275	47464213	+	protein_coding	anoctamin 4 [Source:HGNC Symbol;Acc:HGNC:23837]	-2.73782	0.221847	0.000127329	0.00103638
ENSGALG00000011633	SLC5A8	chr1	47470899	47493729	-	protein_coding	solute carrier family 5 (sodium/monocarboxylate cotransporter), member 8 [Source:HGNC Symbol;Acc:HGNC:19119]	-2.56448	-0.254882	1.69725e-05	0.000184828
ENSGALG00000011739	ERP27	chr1	47853221	47871847	+	protein_coding	endoplasmic reticulum protein 27 [Source:HGNC Symbol;Acc:HGNC:26495]	-2.05745	0.142208	0.00245064	0.0122138
ENSGALG00000011742	ART4	chr1	47903204	47907797	+	protein_coding	ecto-ADP-ribosyltransferase 4 precursor [Source:RefSeq peptide;Acc:NP_001135727]	-2.16722	1.2577	0.00255529	0.0126644
ENSGALG00000011872	NFAM1	chr1	49108596	49112609	+	protein_coding	NFAT activating protein with ITAM motif 1 [Source:HGNC Symbol;Acc:HGNC:29872]	-2.48882	-0.314003	2.22331e-06	3.10534e-05
ENSGALG00000012178	PDGFB	chr1	50582287	50594411	+	protein_coding	platelet-derived growth factor subunit B precursor [Source:RefSeq peptide;Acc:NP_989601]	-2.64446	0.943779	0.000574713	0.00366931
ENSGALG00000012454	CYTH4	chr1	51229151	51248424	-	protein_coding	cytohesin-4 [Source:RefSeq peptide;Acc:NP_001012833]	-4.27343	0.340122	1.11716e-09	3.04843e-08
ENSGALG00000012647	RFX4	chr1	53674650	53748422	-	protein_coding	regulatory factor X, 4 (influences HLA class II expression) [Source:HGNC Symbol;Acc:HGNC:9985]	-2.0616	2.97031	0.00325368	0.0153411
ENSGALG00000012754	PAH	chr1	55229689	55269638	+	protein_coding	phenylalanine-4-hydroxylase [Source:RefSeq peptide;Acc:NP_001001298]	-2.59834	-0.202126	2.59691e-10	7.7548e-09
ENSGALG00000012812	SVOPL	chr1	56510668	56527880	+	protein_coding	SVOP-like [Source:HGNC Symbol;Acc:HGNC:27034]	-2.13598	0.141706	0.00239292	0.011989
ENSGALG00000012875	WEE2	chr1	57477122	57488706	+	protein_coding	WEE1 homolog 2 (S. pombe) [Source:HGNC Symbol;Acc:HGNC:19684]	-2.3197	0.0829818	0.000624339	0.00392631
ENSGALG00000019290	SLC6A12	chr1	60293835	60328513	-	protein_coding	solute carrier family 6 (neurotransmitter transporter), member 12 [Source:HGNC Symbol;Acc:HGNC:11045]	-2.29138	-0.110397	0.000617559	0.00388538
ENSGALG00000012989	NINJ2	chr1	60503834	60505016	-	protein_coding	ninjurin 2 [Source:HGNC Symbol;Acc:HGNC:7825]	-2.07686	1.35541	0.000549095	0.00353149
ENSGALG00000013008	chunk-1	chr1	61121260	61123185	+	protein_coding	CHUNK-1 protein [Source:RefSeq peptide;Acc:NP_990167]	-2.5739	-0.180901	5.09778e-05	0.000477716
ENSGALG00000013218	C3AR1	chr1	66940437	66943731	+	protein_coding	C3a anaphylatoxin chemotactic receptor [Source:RefSeq peptide;Acc:NP_001025940]	-4.54338	-0.0934688	2.09051e-19	2.73185e-17
ENSGALG00000014126		chr1	68465289	68474995	+	protein_coding	Uncharacterized protein [Source:UniProtKB/TrEMBL;Acc:E1C036]	-2.3487	-0.291907	0.000149262	0.00118011
ENSGALG00000017274	CD9	chr1	74509653	74533385	+	protein_coding	CD9 antigen [Source:RefSeq peptide;Acc:NP_990093]	-2.41989	3.39309	5.84909e-06	7.28657e-05
ENSGALG00000027772	NANOG	chr1	75366745	75371263	-	protein_coding	nanog homeobox [Source:RefSeq peptide;Acc:NP_001139614]	-2.74932	0.048632	8.58788e-05	0.000742268
ENSGALG00000014764	HSD3B2	chr1	77954029	77969647	-	protein_coding	Gallus gallus hydroxy-delta-5-steroid dehydrogenase, 3 beta- and steroid delta-isomerase 2 (HSD3B2), mRNA. [Source:RefSeq mRNA;Acc:NM_205118]	-3.74436	-0.294255	3.48031e-18	3.56645e-16
ENSGALG00000014766	HAO2	chr1	77970578	77981343	-	protein_coding	hydroxyacid oxidase 2 (long chain) [Source:HGNC Symbol;Acc:HGNC:4810]	-4.80271	-0.112545	3.19947e-25	9.90722e-23
ENSGALG00000015287	LNP1	chr1	84288844	84301834	+	protein_coding	leukemia NUP98 fusion partner 1 [Source:HGNC Symbol;Acc:HGNC:28014]	-3.80251	-0.0315085	3.99849e-09	9.9397e-08
ENSGALG00000026299	C3orf52	chr1	88036814	88046429	+	protein_coding	chromosome 3 open reading frame 52 [Source:HGNC Symbol;Acc:HGNC:26255]	-2.57298	-0.169943	6.61752e-05	0.000598476
ENSGALG00000015474	CD80	chr1	91635375	91642963	+	protein_coding	Gallus gallus CD80 molecule (CD80), mRNA. [Source:RefSeq mRNA;Acc:NM_001079739]	-2.70549	-0.396171	1.37873e-14	8.57582e-13
ENSGALG00000016254	OTC	chr1	112238933	112264837	-	protein_coding	ornithine carbamoyltransferase, mitochondrial precursor [Source:RefSeq peptide;Acc:NP_990241]	-2.66342	-0.103495	0.000117162	0.000963546
ENSGALG00000022792		chr1	113688262	113692283	-	protein_coding	Uncharacterized protein [Source:UniProtKB/TrEMBL;Acc:F1NRN8]	-2.03141	-0.276882	1.6967e-06	2.44613e-05
ENSGALG00000027180		chr1	123814778	123821938	-	protein_coding	Uncharacterized protein [Source:UniProtKB/TrEMBL;Acc:R4GHK6]	-2.19636	2.02656	0.000502176	0.0032842
ENSGALG00000016721	PLCXD1	chr1	129423877	129442045	-	protein_coding	PI-PLC X domain-containing protein 1 [Source:RefSeq peptide;Acc:NP_001122109]	-2.72335	0.525474	0.000328551	0.00229631
ENSGALG00000016764	EIF5B	chr1	131925076	131944008	+	protein_coding	eukaryotic translation initiation factor 5B [Source:RefSeq peptide;Acc:NP_001033585]	-2.00141	7.98699	2.92635e-49	4.1683e-45
ENSGALG00000016767	AFF3	chr1	132026147	132299346	-	protein_coding	AF4/FMR2 family, member 3 [Source:HGNC Symbol;Acc:HGNC:6473]	-2.61849	2.90452	4.22033e-05	0.000406178
ENSGALG00000016805	SULT1C	chr1	135521670	135527319	+	protein_coding	sulfotransferase 1C1 [Source:RefSeq peptide;Acc:NP_989932]	-2.17466	1.27655	0.00695032	0.0284066
ENSGALG00000022749		chr1	145645684	145647112	-	protein_coding	Uncharacterized protein [Source:UniProtKB/TrEMBL;Acc:F1NAA0]	-3.41569	0.141702	1.50906e-07	2.81717e-06
ENSGALG00000017016	FAM124A	chr1	169341617	169350372	+	protein_coding	family with sequence similarity 124A [Source:HGNC Symbol;Acc:HGNC:26413]	-2.07293	2.17041	0.00107035	0.00623306
ENSGALG00000017149	RNF17	chr1	178552889	178595779	-	protein_coding	ring finger protein 17 [Source:HGNC Symbol;Acc:HGNC:10060]	-2.25225	-0.37426	7.41583e-06	8.99754e-05
ENSGALG00000017269		chr1	192008564	192029116	-	protein_coding	Ubiquitin carboxyl-terminal hydrolase [Source:UniProtKB/TrEMBL;Acc:E1C6Z2]	-2.2978	0.56677	0.00193416	0.0100438
ENSGALG00000000733	MYO7A	chr1	192356567	192453329	-	protein_coding	myosin VIIA [Source:HGNC Symbol;Acc:HGNC:7606]	-2.30915	0.454162	0.00155615	0.00844731
ENSGALG00000017342		chr1	193668690	193669649	+	protein_coding	Olfactory receptor [Source:UniProtKB/TrEMBL;Acc:E1C4Q9]	-2.22234	0.676513	0.0014383	0.00793459
ENSGALG00000005401	WNT9a	chr2	2573612	2624503	+	protein_coding	protein Wnt-9a precursor [Source:RefSeq peptide;Acc:NP_990312]	-2.21646	0.842176	0.0041201	0.0185015
ENSGALG00000023454	C9orf152	chr2	6174629	6180337	+	protein_coding	chromosome 9 open reading frame 152 [Source:HGNC Symbol;Acc:HGNC:31455]	-2.50357	-0.243574	1.33415e-05	0.000149282
ENSGALG00000006379	SHH	chr2	8080091	8089855	-	protein_coding	sonic hedgehog protein precursor [Source:RefSeq peptide;Acc:NP_990152]	-4.34557	2.91527	1.38758e-20	2.12524e-18
ENSGALG00000007426	MKX	chr2	15606690	15649798	+	protein_coding	mohawk homeobox [Source:HGNC Symbol;Acc:HGNC:23729]	-4.17767	1.44386	3.51895e-09	8.90301e-08
ENSGALG00000008602	SLC39A12	chr2	19249639	19287303	-	protein_coding	solute carrier family 39 (zinc transporter), member 12 [Source:HGNC Symbol;Acc:HGNC:20860]	-2.58838	0.298513	0.000512632	0.00334031
ENSGALG00000008912	ABCB1LB	chr2	20547214	20632812	-	protein_coding	multidrug resistance protein 1 [Source:RefSeq peptide;Acc:NP_990225]	-2.08979	-0.264362	0.000302309	0.00214073
ENSGALG00000019662	SLC25A40	chr2	20696196	20709565	-	protein_coding	solute carrier family 25, member 40 [Source:HGNC Symbol;Acc:HGNC:29680]	-3.47997	0.50844	1.95847e-06	2.77853e-05
ENSGALG00000010711	NXPH1	chr2	25215575	25351551	+	protein_coding	neurexophilin 1 [Source:HGNC Symbol;Acc:HGNC:20693]	-3.47886	1.03821	4.79395e-07	8.00528e-06
ENSGALG00000011322	NEK10	chr2	38961151	39013276	-	protein_coding	NIMA-related kinase 10 [Source:HGNC Symbol;Acc:HGNC:18592]	-2.81147	0.314626	3.02483e-05	0.000303848
ENSGALG00000028090	TOPAZ1	chr2	41236477	41280987	-	protein_coding	testis and ovary specific PAZ domain containing 1 [Source:HGNC Symbol;Acc:HGNC:24746]	-2.20521	0.0919925	0.00236864	0.0118883
ENSGALG00000012235	NEUROD6	chr2	49217227	49220714	+	protein_coding	neuronal differentiation 6 [Source:HGNC Symbol;Acc:HGNC:13804]	-3.03504	-0.268585	1.5993e-07	2.96485e-06
ENSGALG00000019589		chr2	56213417	56218826	-	protein_coding	Uncharacterized protein [Source:UniProtKB/TrEMBL;Acc:E1BRZ4]	-2.00773	-0.334658	0.000364813	0.00250791
ENSGALG00000027133	CD83	chr2	60775850	60790940	+	protein_coding	CD83 molecule [Source:HGNC Symbol;Acc:HGNC:1703]	-6.27984	2.17012	3.22249e-15	2.21745e-13
ENSGALG00000012917	CDH6	chr2	69347372	69444035	-	protein_coding	Cadherin-6 [Source:UniProtKB/Swiss-Prot;Acc:Q90762]	-2.10645	3.33102	0.0012219	0.00695076
ENSGALG00000012920		chr2	69404411	69420399	+	protein_coding	Uncharacterized protein [Source:UniProtKB/TrEMBL;Acc:E1C265]	-2.29691	0.138884	8.5421e-05	0.000739208
ENSGALG00000012941	CDH12	chr2	73046218	73413333	+	protein_coding	cadherin 12, type 2 (N-cadherin 2) [Source:HGNC Symbol;Acc:HGNC:1751]	-2.21137	1.42669	0.00387084	0.0175761
ENSGALG00000027026		chr2	78319552	78332004	+	protein_coding	Uncharacterized protein [Source:UniProtKB/TrEMBL;Acc:R4GI33]	-2.19902	1.22814	0.00142628	0.00788332
ENSGALG00000013083	ZPBP	chr2	80510980	80537096	-	protein_coding	zona pellucida-binding protein 1 [Source:RefSeq peptide;Acc:NP_001025551]	-3.94022	0.0298836	4.3452e-10	1.25289e-08
ENSGALG00000028075	VSTM2A	chr2	82285136	82324750	+	protein_coding	V-set and transmembrane domain containing 2A [Source:HGNC Symbol;Acc:HGNC:28499]	-2.62302	0.161892	0.000154411	0.0012165
ENSGALG00000027053	C18orf42	chr2	100141468	100160125	+	protein_coding	chromosome 18 open reading frame 42 [Source:HGNC Symbol;Acc:HGNC:28285]	-2.30373	-0.191975	0.000253442	0.0018494
ENSGALG00000014904	CLUL1	chr2	101615896	101625416	-	protein_coding	clusterin-like 1 (retinal) [Source:HGNC Symbol;Acc:HGNC:2096]	-5.40798	1.06046	2.07198e-15	1.46832e-13
ENSGALG00000015153		chr2	105917552	105952043	-	protein_coding	Uncharacterized protein [Source:UniProtKB/TrEMBL;Acc:F1NU85]	-2.8629	0.0123463	1.94555e-05	0.000207429
ENSGALG00000024487	C8orf22	chr2	108189927	108193054	+	protein_coding	chromosome 8 open reading frame 22 [Source:HGNC Symbol;Acc:HGNC:31745]	-4.05789	2.13241	2.96404e-08	6.43594e-07
ENSGALG00000015261	NPBWR1	chr2	109787986	109790507	+	protein_coding	neuropeptides B/W receptor 1 [Source:HGNC Symbol;Acc:HGNC:4522]	-4.23901	0.104507	2.50589e-10	7.49872e-09
ENSGALG00000015448	TOX	chr2	111851189	112072073	-	protein_coding	thymocyte selection-associated high mobility group box protein TOX [Source:RefSeq peptide;Acc:NP_001026196]	-2.78346	2.58415	6.53013e-10	1.83101e-08
ENSGALG00000015736	STMN2	chr2	120505360	120515753	+	protein_coding	Gallus gallus stathmin-like 2 (STMN2), mRNA. [Source:RefSeq mRNA;Acc:NM_205181]	-2.0901	1.2147	0.00447527	0.0198338
ENSGALG00000028628	LAPTM4B	chr2	127102614	127165676	+	protein_coding	lysosomal protein transmembrane 4 beta [Source:HGNC Symbol;Acc:HGNC:13646]	-3.38522	3.58427	1.04163e-05	0.00012043
ENSGALG00000016032	FBXO43	chr2	128160369	128168119	-	protein_coding	F-box protein 43 [Source:HGNC Symbol;Acc:HGNC:28521]	-2.03242	-0.316776	0.000600486	0.00381196
ENSGALG00000016368	KLHL38	chr2	137696848	137701773	-	protein_coding	kelch-like family member 38 [Source:HGNC Symbol;Acc:HGNC:34435]	-3.35104	-0.342847	5.19417e-18	5.17383e-16
ENSGALG00000016360	ANXA13	chr2	137709300	137734052	-	protein_coding	annexin A13 [Source:RefSeq peptide;Acc:NP_001186430]	-2.74772	0.160991	0.000202593	0.00153089
ENSGALG00000026593	HHLA1	chr2	140961259	140974304	-	protein_coding	HERV-H LTR-associating 1 [Source:HGNC Symbol;Acc:HGNC:4904]	-2.54148	-0.29899	5.42564e-06	6.86959e-05
ENSGALG00000016233	TG	chr2	141333054	141469306	+	protein_coding	thyroglobulin [Source:HGNC Symbol;Acc:HGNC:11764]	-2.55031	0.585997	0.000247272	0.00180994
ENSGALG00000016234	SLA	chr2	141410203	141432079	-	protein_coding	src-like-adapter [Source:RefSeq peptide;Acc:NP_989722]	-2.20035	0.576995	9.51066e-18	9.27876e-16
ENSGALG00000016153	PSCA	chr2	147859019	147863129	+	protein_coding	prostate stem cell antigen [Source:HGNC Symbol;Acc:HGNC:9500]	-3.05681	1.29479	6.65541e-06	8.17239e-05
ENSGALG00000023934		chr3	2120796	2165960	+	protein_coding	Uncharacterized protein [Source:UniProtKB/TrEMBL;Acc:F1P4L4]	-4.5629	0.213465	7.47516e-14	4.04853e-12
ENSGALG00000020084	CAPN13	chr3	7749554	7787813	+	protein_coding	calpain 13 [Source:HGNC Symbol;Acc:HGNC:16663]	-3.48093	-0.000872127	6.91867e-08	1.40384e-06
ENSGALG00000008928		chr3	8983993	8989307	+	protein_coding	Uncharacterized protein [Source:UniProtKB/TrEMBL;Acc:E1BY50]	-3.0357	-0.31048	7.85245e-09	1.87984e-07
ENSGALG00000028234	SYNDIG1	chr3	15008233	15108357	+	protein_coding	synapse differentiation inducing 1 [Source:HGNC Symbol;Acc:HGNC:15885]	-2.72538	3.79968	3.91185e-11	1.33943e-09
ENSGALG00000008660	CST7	chr3	15162124	15167409	+	protein_coding	cystatin-F precursor [Source:RefSeq peptide;Acc:NP_001186323]	-3.93543	-0.212968	5.02232e-14	2.80541e-12
ENSGALG00000020077	DNAH14	chr3	16773684	16784549	-	protein_coding	dynein, axonemal, heavy chain 14 [Source:HGNC Symbol;Acc:HGNC:2945]	-2.75599	-0.307767	5.55722e-07	9.09727e-06
ENSGALG00000009444	HHIPL2	chr3	17413492	17428388	+	protein_coding	HHIP-like 2 [Source:HGNC Symbol;Acc:HGNC:25842]	-2.19821	0.0155182	0.00262344	0.0129302
ENSGALG00000026727	SLC30A10	chr3	18207442	18229528	+	protein_coding	solute carrier family 30, member 10 [Source:HGNC Symbol;Acc:HGNC:25355]	-2.21311	0.716789	0.0046577	0.0205019
ENSGALG00000010032	PLB1	chr3	26632539	26715148	-	protein_coding	phospholipase B1 [Source:HGNC Symbol;Acc:HGNC:30041]	-2.71576	0.0560239	0.00017017	0.00131994
ENSGALG00000010772	RGS7	chr3	35238582	35471485	+	protein_coding	regulator of G-protein signaling 7 [Source:RefSeq peptide;Acc:NP_001185527]	-2.73555	0.239496	0.000106299	0.000888109
ENSGALG00000011273		chr3	41111752	41117676	-	protein_coding	Sulfotransferase [Source:UniProtKB/TrEMBL;Acc:E1BRF0]	-2.57777	-0.377017	4.51948e-10	1.29789e-08
ENSGALG00000012297	GRM1	chr3	45937157	46118743	+	protein_coding	Glutamate receptor metabotropic 1 isoform f transcript variant 1 [Source:UniProtKB/TrEMBL;Acc:F1NBM2]	-2.28554	0.464622	0.00224989	0.0113764
ENSGALG00000023054		chr3	50322346	50368673	-	protein_coding	Uncharacterized protein [Source:UniProtKB/TrEMBL;Acc:F1NKH8]	-2.43489	-0.244811	2.38901e-06	3.31667e-05
ENSGALG00000013822	TXLNB	chr3	53273170	53301050	+	protein_coding	beta-taxilin [Source:RefSeq peptide;Acc:NP_990085]	-2.38852	-0.27314	3.09747e-05	0.000309399
ENSGALG00000013861	TNFAIP3	chr3	53854460	53873283	-	protein_coding	tumor necrosis factor, alpha-induced protein 3 [Source:HGNC Symbol;Acc:HGNC:11896]	-2.29729	3.73982	2.11752e-05	0.000222926
ENSGALG00000014829	RSPO3	chr3	58726123	58785427	-	protein_coding	R-spondin 3 [Source:HGNC Symbol;Acc:HGNC:20866]	-2.80133	3.05723	4.63568e-05	0.00043816
ENSGALG00000015057	DDO	chr3	65969395	65975774	+	protein_coding	D-aspartate oxidase [Source:HGNC Symbol;Acc:HGNC:2727]	-3.40639	2.72004	6.80558e-07	1.08676e-05
ENSGALG00000015895	HTR1B	chr3	79492220	79493385	+	protein_coding	5-hydroxytryptamine receptor 1B [Source:RefSeq peptide;Acc:NP_001166252]	-3.15989	0.0348626	1.04252e-07	2.0342e-06
ENSGALG00000016176	ADGRB3	chr3	82664538	83111962	-	protein_coding	adhesion G protein-coupled receptor B3 [Source:HGNC Symbol;Acc:HGNC:945]	-2.70045	1.48088	0.000468445	0.00309487
ENSGALG00000016183		chr3	84449717	84579680	+	protein_coding	Uncharacterized protein [Source:UniProtKB/TrEMBL;Acc:F1NLR5]	-5.32275	0.149069	7.3589e-22	1.34385e-19
ENSGALG00000017926	7SK	chr3	87768167	87768495	-	misc_RNA	7SK RNA [Source:RFAM;Acc:RF00100]	-4.22546	2.47678	7.20581e-30	3.5393e-27
ENSGALG00000027528	C2orf50	chr3	96720339	96726973	+	protein_coding	chromosome 2 open reading frame 50 [Source:HGNC Symbol;Acc:HGNC:26324]	-2.65594	-0.176001	9.40886e-08	1.8588e-06
ENSGALG00000016600	Pomc	chr3	105013957	105016899	+	protein_coding	pro-opiomelanocortin precursor [Source:RefSeq peptide;Acc:NP_001026269]	-2.06684	-0.140103	0.0023775	0.0119243
ENSGALG00000016651		chr3	106804291	106812581	+	protein_coding	Uncharacterized protein [Source:UniProtKB/TrEMBL;Acc:F1NFM2]	-2.98863	2.02197	1.96316e-05	0.000208681
ENSGALG00000016661	BLK	chr3	106862804	106898321	+	protein_coding	BLK proto-oncogene, Src family tyrosine kinase [Source:HGNC Symbol;Acc:HGNC:1057]	-2.55324	0.45273	2.6608e-05	0.000271493
ENSGALG00000016667	GAL10	chr3	107053577	107056194	+	protein_coding	Gallinacin-10 [Source:UniProtKB/Swiss-Prot;Acc:Q6QLQ9]	-3.50219	-0.202713	2.30699e-09	6.04059e-08
ENSGALG00000016670	DEFB1	chr3	107088312	107090857	-	protein_coding	Gallinacin-3 [Source:UniProtKB/Swiss-Prot;Acc:Q9DG58]	-4.62815	0.0389188	2.23072e-19	2.88858e-17
ENSGALG00000019843	GAL4	chr3	107097384	107099252	-	protein_coding	Gallinacin-4 [Source:UniProtKB/Swiss-Prot;Acc:Q6GXJ1]	-3.74127	-0.211337	1.30299e-11	4.83329e-10
ENSGALG00000016725	OPN5	chr3	109727731	109741746	+	protein_coding	opsin-5 [Source:RefSeq peptide;Acc:NP_001124215]	-3.28362	-0.179609	9.5798e-07	1.47359e-05
ENSGALG00000004599	EDA2R	chr4	360637	369568	-	protein_coding	tumor necrosis factor receptor superfamily member 27 [Source:RefSeq peptide;Acc:NP_001076829]	-2.40063	1.88289	0.000229481	0.00170069
ENSGALG00000004734		chr4	1807529	1811398	+	protein_coding	Uncharacterized protein [Source:UniProtKB/TrEMBL;Acc:F1NHE2]	-4.53438	0.0986056	1.11505e-11	4.19071e-10
ENSGALG00000007123		chr4	9317485	9318803	-	protein_coding	Uncharacterized protein [Source:UniProtKB/TrEMBL;Acc:E1C5W4]	-2.49875	0.0357463	0.000212508	0.0015965
ENSGALG00000007157	FAM46D	chr4	9464756	9466356	-	protein_coding	family with sequence similarity 46, member D [Source:HGNC Symbol;Acc:HGNC:28399]	-2.00448	0.565625	0.00548909	0.0234583
ENSGALG00000007538		chr4	11290443	11296120	+	protein_coding	Uncharacterized protein [Source:UniProtKB/TrEMBL;Acc:F1NSY9]	-4.28341	-0.219751	4.53369e-22	8.61038e-20
ENSGALG00000020283		chr4	11562204	11564074	-	protein_coding	Uncharacterized protein [Source:UniProtKB/TrEMBL;Acc:E1C3V7]	-2.17756	0.952445	0.00304833	0.0146443
ENSGALG00000008408	GAB3	chr4	14214093	14257191	-	protein_coding	GRB2-associated binding protein 3 [Source:HGNC Symbol;Acc:HGNC:17515]	-2.29993	1.02267	0.00276665	0.0135191
ENSGALG00000009489	FSTL5	chr4	22250827	22516765	-	protein_coding	follistatin-like 5 [Source:HGNC Symbol;Acc:HGNC:21386]	-3.82331	1.4968	3.69831e-07	6.3164e-06
ENSGALG00000009830		chr4	29125100	29158609	-	protein_coding		-3.12111	0.0169941	1.13218e-06	1.70653e-05
ENSGALG00000010402	HPGDS	chr4	36621105	36636068	-	protein_coding	Hematopoietic prostaglandin D synthase [Source:UniProtKB/Swiss-Prot;Acc:O73888]	-2.97108	2.09257	1.60115e-05	0.000175571
ENSGALG00000010755	SCRG1	chr4	42763397	42769576	-	protein_coding	stimulator of chondrogenesis 1 [Source:HGNC Symbol;Acc:HGNC:17036]	-2.19979	0.37478	0.000464563	0.00307065
ENSGALG00000010864	EREG	chr4	44141004	44149715	+	protein_coding	proepiregulin precursor [Source:RefSeq peptide;Acc:NP_001001203]	-3.99641	-0.2638	1.22575e-22	2.56759e-20
ENSGALG00000010883		chr4	44289269	44291731	-	protein_coding	Uncharacterized protein [Source:UniProtKB/TrEMBL;Acc:E1C768]	-2.44522	-0.0028185	0.000192386	0.00146542
ENSGALG00000023172		chr4	48984184	48996527	+	protein_coding	Uncharacterized protein [Source:UniProtKB/TrEMBL;Acc:F1NCJ5]	-3.01477	0.0524916	1.79324e-05	0.000193801
ENSGALG00000027872	FAM47E-STBD1	chr4	49315135	49316800	-	protein_coding	FAM47E-STBD1 readthrough [Source:HGNC Symbol;Acc:HGNC:44667]	-2.61432	3.63065	3.0941e-07	5.37468e-06
ENSGALG00000026098	IL8	chr4	50355001	50359957	+	protein_coding	Interleukin-8 [Source:UniProtKB/Swiss-Prot;Acc:P08317]	-5.88223	1.28627	5.18328e-13	2.46925e-11
ENSGALG00000024484		chr4	50379773	50381069	+	protein_coding	Uncharacterized protein [Source:UniProtKB/TrEMBL;Acc:E1BRC5]	-2.07592	-0.209967	0.00130407	0.00733329
ENSGALG00000012271	MTTP	chr4	59638502	59665944	+	protein_coding	microsomal triglyceride transfer protein large subunit precursor [Source:RefSeq peptide;Acc:NP_001103254]	-3.67321	0.445978	9.75694e-07	1.49922e-05
ENSGALG00000013414	PDLIM3	chr4	60671425	60692637	-	protein_coding	PDZ and LIM domain protein 3 [Source:RefSeq peptide;Acc:NP_001001764]	-2.42383	1.02444	0.00313725	0.0149355
ENSGALG00000013468	TLR3	chr4	60925661	60939133	+	protein_coding	toll-like receptor 3 precursor [Source:RefSeq peptide;Acc:NP_001011691]	-3.50023	-0.177576	1.37783e-09	3.71702e-08
ENSGALG00000014372	SLC34A2	chr4	73038472	73055616	-	protein_coding	sodium-dependent phosphate transport protein 2B [Source:RefSeq peptide;Acc:NP_989805]	-4.13701	-0.0923148	1.48335e-11	5.43157e-10
ENSGALG00000027109	SPON2	chr4	84441720	84468575	+	protein_coding	spondin 2, extracellular matrix protein [Source:HGNC Symbol;Acc:HGNC:11253]	-4.00426	-0.262132	2.6081e-20	3.7908e-18
ENSGALG00000021810		chr4	85938145	86209254	+	protein_coding	Uncharacterized protein [Source:UniProtKB/TrEMBL;Acc:E1BU94]	-2.12045	-0.362529	1.7232e-05	0.000187126
ENSGALG00000003608		chr5	225251	226264	+	protein_coding	Olfactory receptor [Source:UniProtKB/TrEMBL;Acc:E1C5F0]	-2.25207	-0.294258	0.000146695	0.00116408
ENSGALG00000004792	PLCB2	chr5	665318	702105	-	protein_coding	phospholipase C, beta 2 [Source:HGNC Symbol;Acc:HGNC:9055]	-2.43212	0.143766	0.000611096	0.00385494
ENSGALG00000004414	LUZP2	chr5	1107502	1274845	-	protein_coding	leucine zipper protein 2 [Source:RefSeq peptide;Acc:NP_001186450]	-3.35144	1.56104	1.2114e-06	1.80494e-05
ENSGALG00000004280	ANO9	chr5	1537037	1551688	+	protein_coding	anoctamin 9 [Source:HGNC Symbol;Acc:HGNC:20679]	-2.52959	-0.351932	5.24152e-07	8.67134e-06
ENSGALG00000013304	SLC5A12	chr5	3407276	3423420	-	protein_coding	solute carrier family 5 (sodium/monocarboxylate cotransporter), member 12 [Source:HGNC Symbol;Acc:HGNC:28750]	-4.09185	0.47905	3.38244e-09	8.61886e-08
ENSGALG00000012140	FSH	chr5	4546066	4549439	+	protein_coding	follitropin subunit beta precursor [Source:RefSeq peptide;Acc:NP_989588]	-3.56758	-0.32429	1.21417e-20	1.92162e-18
ENSGALG00000005662	AMPD3	chr5	8361714	8387323	-	protein_coding	AMP deaminase 3 [Source:RefSeq peptide;Acc:NP_001186517]	-2.46658	2.17344	1.84652e-06	2.64074e-05
ENSGALG00000005892	SCUBE2	chr5	8927057	8961764	+	protein_coding	signal peptide, CUB domain, EGF-like 2 [Source:HGNC Symbol;Acc:HGNC:30425]	-2.40221	1.67735	0.00171331	0.00912314
ENSGALG00000006551	tyrosine	chr5	13094004	13110393	+	protein_coding	tyrosine 3-monooxygenase [Source:RefSeq peptide;Acc:NP_990136]	-2.25473	0.853232	0.00512846	0.0221573
ENSGALG00000014297	IRF-3	chr5	15206202	15209669	+	protein_coding	interferon regulatory factor 3 [Source:RefSeq peptide;Acc:NP_990703]	-3.37267	2.68392	5.01936e-07	8.34257e-06
ENSGALG00000027874	CHAC1	chr5	23730412	23732558	+	protein_coding	cation transport regulator-like protein 1 [Source:RefSeq peptide;Acc:NP_001186585]	-2.57141	5.65763	1.55459e-06	2.25955e-05
ENSGALG00000009705	RYR3	chr5	29439524	29623554	-	protein_coding	ryanodine receptor 3 [Source:RefSeq peptide;Acc:NP_996757]	-3.88365	2.63281	1.2719e-17	1.21591e-15
ENSGALG00000028483	NKX2-8	chr5	35952997	35955492	-	protein_coding	NK2 homeobox 8 [Source:HGNC Symbol;Acc:HGNC:16364]	-2.28396	0.678396	0.00312306	0.0148779
ENSGALG00000010323	BATF	chr5	37562117	37567648	+	protein_coding	basic leucine zipper transcription factor, ATF-like [Source:HGNC Symbol;Acc:HGNC:958]	-2.37103	0.243756	0.000309739	0.00218629
ENSGALG00000010456		chr5	38465526	38472972	-	protein_coding	Uncharacterized protein [Source:UniProtKB/TrEMBL;Acc:E1C128]	-2.62768	1.08638	0.000603848	0.00382316
ENSGALG00000010458	NOXRED1	chr5	38491459	38495653	-	protein_coding	NADP-dependent oxidoreductase domain containing 1 [Source:HGNC Symbol;Acc:HGNC:20487]	-2.04797	-0.0723122	0.00393095	0.0177923
ENSGALG00000010974	GSC	chr5	44981707	44983006	-	protein_coding	homeobox protein goosecoid [Source:RefSeq peptide;Acc:NP_990662]	-3.01508	1.27047	1.59487e-05	0.000175018
ENSGALG00000011860		chr5	53750286	53761950	-	protein_coding	Uncharacterized protein [Source:UniProtKB/TrEMBL;Acc:F1NM05]	-2.63702	-0.29339	2.03958e-06	2.86789e-05
ENSGALG00000020359	SIX6	chr5	54339070	54341868	-	protein_coding	Homeobox protein SIX6 [Source:UniProtKB/Swiss-Prot;Acc:O93307]	-2.38547	-0.223017	0.00011213	0.000930217
ENSGALG00000020358	C14orf39	chr5	54345716	54373899	+	protein_coding	chromosome 14 open reading frame 39 [Source:HGNC Symbol;Acc:HGNC:19849]	-2.74625	-0.393744	9.71073e-15	6.20268e-13
ENSGALG00000012005	LRRC9	chr5	54545271	54565985	-	protein_coding	leucine rich repeat containing 9 [Source:HGNC Symbol;Acc:HGNC:19848]	-3.2268	-0.233251	8.28832e-09	1.97093e-07
ENSGALG00000012094	SLC35F4	chr5	55279123	55387350	+	protein_coding	solute carrier family 35, member F4 [Source:HGNC Symbol;Acc:HGNC:19845]	-2.4085	0.41054	0.000737449	0.00452573
ENSGALG00000012095	C14orf105	chr5	55387429	55393814	+	protein_coding	chromosome 14 open reading frame 105 [Source:HGNC Symbol;Acc:HGNC:20189]	-3.31472	1.53634	6.0584e-07	9.80635e-06
ENSGALG00000001825	FAM13C	chr6	89349	133958	+	protein_coding	family with sequence similarity 13, member C [Source:HGNC Symbol;Acc:HGNC:19371]	-2.85682	-0.108452	3.6447e-06	4.82034e-05
ENSGALG00000002432	DYDC1	chr6	3896161	3899840	+	protein_coding	DPY30 domain-containing protein 1 [Source:RefSeq peptide;Acc:NP_001186446]	-3.09433	-0.246015	5.47242e-08	1.13463e-06
ENSGALG00000002479	MAT1A	chr6	3915004	3932026	+	protein_coding	S-adenosylmethionine synthase isoform type-1 [Source:RefSeq peptide;Acc:NP_001186448]	-3.4097	2.37538	2.32998e-05	0.00024225
ENSGALG00000002503	SP-A	chr6	3961091	3967496	-	protein_coding	surfactant, pulmonary-associated protein A1 precursor [Source:RefSeq peptide;Acc:NP_989937]	-4.72522	-0.112767	2.12519e-21	3.73719e-19
ENSGALG00000024441		chr6	4631741	4641984	+	protein_coding	Uncharacterized protein [Source:UniProtKB/TrEMBL;Acc:F1NR05]	-2.02737	-0.255622	0.000953611	0.00564322
ENSGALG00000023842		chr6	17703944	17731676	-	protein_coding	Uncharacterized protein [Source:UniProtKB/TrEMBL;Acc:F1P069]	-2.57898	-0.389179	2.50977e-11	8.89284e-10
ENSGALG00000006165	WDFY4	chr6	17984757	18098872	+	protein_coding	WDFY family member 4 [Source:HGNC Symbol;Acc:HGNC:29323]	-2.9035	0.096369	5.49522e-05	0.000507613
ENSGALG00000028238		chr6	23104676	23106678	+	protein_coding	Uncharacterized protein [Source:UniProtKB/TrEMBL;Acc:R4GHS8]	-2.47202	0.0513704	1.05094e-05	0.000121113
ENSGALG00000008434	SORCS3	chr6	23968010	24235717	+	protein_coding	sortilin-related VPS10 domain containing receptor 3 [Source:HGNC Symbol;Acc:HGNC:16699]	-2.68277	-0.16172	1.70861e-05	0.000185782
ENSGALG00000010500	Nkx-6.2	chr6	34788047	34790162	-	protein_coding	homeobox protein Nkx-6.2 [Source:RefSeq peptide;Acc:NP_001186477]	-3.7562	3.66013	6.33748e-06	7.82245e-05
ENSGALG00000010513	TCTN3	chr6	34813618	34819184	+	protein_coding	tectonic-3 [Source:RefSeq peptide;Acc:NP_001098788]	-2.88708	1.71524	5.78951e-05	0.000532724
ENSGALG00000021038		chr7	4808405	4846775	-	protein_coding	Uncharacterized protein [Source:UniProtKB/TrEMBL;Acc:E1BQ81]	-3.37516	-0.319472	1.20776e-14	7.57859e-13
ENSGALG00000002213		chr7	6899882	6906295	+	protein_coding	Uncharacterized protein [Source:UniProtKB/TrEMBL;Acc:F1NV85]	-4.36135	-0.20568	2.94525e-23	6.45418e-21
ENSGALG00000008516	CPO	chr7	11854607	11868058	-	protein_coding	carboxypeptidase O [Source:HGNC Symbol;Acc:HGNC:21011]	-2.48823	-0.26327	4.58795e-05	0.000434802
ENSGALG00000020836		chr7	11928619	11936413	-	protein_coding	Neurosecretory protein GL [Source:UniProtKB/TrEMBL;Acc:E1BYC2]	-3.17431	2.91764	2.22139e-08	4.89048e-07
ENSGALG00000012061		chr7	27688524	27704865	+	protein_coding	Glycerol-3-phosphate dehydrogenase [NAD(+)] [Source:UniProtKB/TrEMBL;Acc:F1NFY2]	-4.14584	0.315981	2.35189e-09	6.1356e-08
ENSGALG00000025740	EN1	chr7	28021767	28026638	+	protein_coding	engrailed homeobox 1 [Source:HGNC Symbol;Acc:HGNC:3342]	-2.57889	1.06909	8.73704e-05	0.000752876
ENSGALG00000020592		chr7	30994039	30994929	-	protein_coding		-2.03804	-0.350966	9.52569e-05	0.00080957
ENSGALG00000002287	CRB1	chr8	2476868	2538304	-	protein_coding	crumbs family member 1, photoreceptor morphogenesis associated [Source:HGNC Symbol;Acc:HGNC:2343]	-2.53695	0.581245	0.000336553	0.00234091
ENSGALG00000004472	ASTN1	chr8	6711187	6754418	+	protein_coding	astrotactin 1 [Source:HGNC Symbol;Acc:HGNC:773]	-2.24719	2.87661	5.15948e-08	1.07759e-06
ENSGALG00000006031	BRDT	chr8	13240737	13261936	-	protein_coding	bromodomain, testis-specific [Source:HGNC Symbol;Acc:HGNC:1105]	-2.51084	-0.0214278	0.000267494	0.00194397
ENSGALG00000010436	DMBX1	chr8	20565276	20583037	-	protein_coding	diencephalon/mesencephalon homeobox 1 [Source:HGNC Symbol;Acc:HGNC:19026]	-2.37906	0.103799	0.0014689	0.00806901
ENSGALG00000010721	GLIS1	chr8	23804849	23900621	-	protein_coding	GLIS family zinc finger 1 [Source:HGNC Symbol;Acc:HGNC:29525]	-2.36304	1.18187	0.00305925	0.0146824
ENSGALG00000010791	C1orf177	chr8	24152396	24156229	+	protein_coding	chromosome 1 open reading frame 177 [Source:HGNC Symbol;Acc:HGNC:26854]	-2.05928	-0.366541	6.28974e-05	0.000572467
ENSGALG00000011113	SGIP1	chr8	27431896	27462447	+	protein_coding	SH3-domain GRB2-like (endophilin) interacting protein 1 [Source:HGNC Symbol;Acc:HGNC:25412]	-3.01396	0.544608	1.0884e-05	0.000124724
ENSGALG00000005511		chr9	5043819	5080768	-	protein_coding	Uncharacterized protein [Source:UniProtKB/TrEMBL;Acc:F1NTL8]	-2.38107	0.226033	0.000414018	0.00278042
ENSGALG00000007226	OSTN	chr9	13186472	13199826	-	protein_coding	osteocrin precursor [Source:RefSeq peptide;Acc:NP_001092078]	-3.24953	-0.0482796	1.52181e-06	2.21416e-05
ENSGALG00000026953	TMEM207	chr9	13388920	13395027	+	protein_coding	transmembrane protein 207 [Source:RefSeq peptide;Acc:NP_001264624]	-2.67583	-0.322263	1.10684e-06	1.67544e-05
ENSGALG00000008283		chr9	15165312	15170586	+	protein_coding	Uncharacterized protein [Source:UniProtKB/TrEMBL;Acc:F1P1T3]	-2.90229	-0.173497	7.18121e-07	1.14035e-05
ENSGALG00000026983	CHRD	chr9	15406844	15413438	-	protein_coding	chordin precursor [Source:RefSeq peptide;Acc:NP_990311]	-2.37641	1.6183	0.00133571	0.00746988
ENSGALG00000008848	SOX2	chr9	16342563	16343510	-	protein_coding	Transcription factor SOX-2 [Source:UniProtKB/Swiss-Prot;Acc:P48430]	-2.19568	0.384103	3.70528e-05	0.000362735
ENSGALG00000026672	SOX2OT_exon3	chr9	16352844	16353105	-	misc_RNA	SOX2 overlapping transcript exon 3 [Source:RFAM;Acc:RF01953]	-2.38713	-0.149076	2.01018e-06	2.8434e-05
ENSGALG00000020707	SOX2OT_exon1	chr9	16391649	16391874	-	misc_RNA	SOX2 overlapping transcript exon 1 [Source:RFAM;Acc:RF01951]	-2.3714	-0.314294	5.28926e-06	6.7268e-05
ENSGALG00000027947	Ghsr	chr9	18772273	18779087	+	protein_coding	growth hormone secretagogue receptor type 1 [Source:RefSeq peptide;Acc:NP_989725]	-4.02056	-0.0558262	1.72815e-11	6.23184e-10
ENSGALG00000010439		chr9	23399168	23405755	-	protein_coding	Uncharacterized protein [Source:UniProtKB/TrEMBL;Acc:F1N9J7]	-2.05759	2.74829	0.00340034	0.0158906
ENSGALG00000002786	PSTPIP1	chr10	2645392	2690216	-	protein_coding	proline-serine-threonine phosphatase interacting protein 1 [Source:HGNC Symbol;Acc:HGNC:9580]	-2.09176	-0.0172449	0.000528396	0.0034258
ENSGALG00000027498		chr10	4747883	4748845	-	protein_coding		-2.51867	-0.0496389	2.53265e-05	0.000259719
ENSGALG00000003849	TRPM1	chr10	5146745	5227651	+	protein_coding	transient receptor potential cation channel, subfamily M, member 1 [Source:HGNC Symbol;Acc:HGNC:7146]	-2.56002	0.0760586	6.02144e-05	0.000550509
ENSGALG00000004096	CHRNA7	chr10	6156717	6199170	-	protein_coding	neuronal acetylcholine receptor subunit alpha-7 precursor [Source:RefSeq peptide;Acc:NP_989512]	-2.53716	1.09708	0.000181041	0.00139166
ENSGALG00000004103	FAM81A	chr10	6216548	6227549	-	protein_coding	family with sequence similarity 81, member A [Source:HGNC Symbol;Acc:HGNC:28379]	-2.16589	1.27879	0.00240595	0.0120458
ENSGALG00000004545	WDR72	chr10	7807793	7874460	+	protein_coding	WD repeat domain 72 [Source:HGNC Symbol;Acc:HGNC:26790]	-2.91349	1.02642	0.000133647	0.00107552
ENSGALG00000004945	SLC12A1	chr10	9587065	9632792	+	protein_coding	solute carrier family 12 (sodium/potassium/chloride transporter), member 1 [Source:HGNC Symbol;Acc:HGNC:10910]	-4.85919	2.56667	2.93335e-11	1.02691e-09
ENSGALG00000007012	ARRDC4	chr10	15958078	15967730	+	protein_coding	arrestin domain containing 4 [Source:HGNC Symbol;Acc:HGNC:28087]	-2.18341	2.99428	8.21477e-05	0.000715227
ENSGALG00000000874	NDRG4	chr11	350494	364200	-	protein_coding	NDRG family member 4 [Source:HGNC Symbol;Acc:HGNC:14466]	-2.08387	1.26493	0.000332237	0.00231866
ENSGALG00000001011	CNGB1	chr11	457682	471120	+	protein_coding	cyclic nucleotide gated channel beta 1 [Source:HGNC Symbol;Acc:HGNC:2151]	-2.43908	0.758535	0.000241614	0.00177491
ENSGALG00000005708	HNF4beta	chr11	16459264	16479967	+	protein_coding	hepatic nuclear factor 4beta [Source:RefSeq peptide;Acc:NP_001025747]	-2.18483	0.570445	0.00302579	0.0145803
ENSGALG00000001697		chr12	770513	787917	+	protein_coding		-4.03041	-0.235925	1.18576e-18	1.34047e-16
ENSGALG00000004879	SLC6A11	chr12	4050596	4132519	+	protein_coding	solute carrier family 6 (neurotransmitter transporter), member 11 [Source:HGNC Symbol;Acc:HGNC:11044]	-2.11981	0.764389	0.00441745	0.0196142
ENSGALG00000005400	CACNA2D3	chr12	7310503	7722064	+	protein_coding	calcium channel, voltage-dependent, alpha 2/delta subunit 3 [Source:HGNC Symbol;Acc:HGNC:15460]	-2.41302	2.11762	0.00020701	0.00156096
ENSGALG00000005972	KBTBD12	chr12	9552454	9577601	-	protein_coding	kelch repeat and BTB (POZ) domain containing 12 [Source:HGNC Symbol;Acc:HGNC:25731]	-4.35498	-0.0613921	7.40398e-15	4.83772e-13
ENSGALG00000022644	CCDC36	chr12	11494200	11511030	-	protein_coding	coiled-coil domain containing 36 [Source:HGNC Symbol;Acc:HGNC:27945]	-2.95859	-0.220182	2.24722e-07	4.00117e-06
ENSGALG00000006944		chr12	11647655	11651011	+	protein_coding	crescent precursor [Source:RefSeq peptide;Acc:NP_990430]	-2.32167	1.82904	0.000764782	0.00467936
ENSGALG00000007152	FAM3D	chr12	11855792	11860341	-	protein_coding	family with sequence similarity 3, member D [Source:HGNC Symbol;Acc:HGNC:18665]	-2.66075	-0.0624821	0.000136191	0.00109167
ENSGALG00000027934	FAM19A1	chr12	14921472	15122905	+	protein_coding	family with sequence similarity 19 (chemokine (C-C motif)-like), member A1 [Source:HGNC Symbol;Acc:HGNC:21587]	-2.40786	0.883572	0.0021564	0.0109621
ENSGALG00000007927	CNTN6	chr12	17553475	17631889	+	protein_coding	contactin 6 [Source:HGNC Symbol;Acc:HGNC:2176]	-3.82436	0.304873	7.04561e-08	1.42553e-06
ENSGALG00000001045	SLC4A9	chr13	972298	989098	+	protein_coding	solute carrier family 4, sodium bicarbonate cotransporter, member 9 [Source:HGNC Symbol;Acc:HGNC:11035]	-2.7747	-0.296242	1.38767e-06	2.03983e-05
ENSGALG00000001132	APBB3	chr13	1096712	1100458	-	protein_coding	amyloid beta (A4) precursor protein-binding, family B, member 3 [Source:HGNC Symbol;Acc:HGNC:20708]	-2.81948	0.044521	1.84186e-05	0.000198004
ENSGALG00000002191	TLX2	chr13	2673915	2675387	-	protein_coding	T-cell leukemia homeobox 2 [Source:HGNC Symbol;Acc:HGNC:5057]	-2.096	0.795144	0.00695468	0.0284091
ENSGALG00000001695	GABRA6	chr13	6621733	6646067	-	protein_coding	Gamma-aminobutyric acid receptor subunit alpha-6 [Source:UniProtKB/Swiss-Prot;Acc:Q90845]	-3.45941	0.230762	4.55206e-07	7.63716e-06
ENSGALG00000001662	ATP10B	chr13	7040657	7094574	+	protein_coding	ATPase, class V, type 10B [Source:HGNC Symbol;Acc:HGNC:13543]	-4.61814	1.99399	2.6771e-10	7.96088e-09
ENSGALG00000001416	ADRA1B	chr13	7334921	7350963	-	protein_coding	adrenoceptor alpha 1B [Source:HGNC Symbol;Acc:HGNC:278]	-2.74811	0.209243	0.000343277	0.0023749
ENSGALG00000003818	CYFIP2	chr13	10683472	10727449	-	protein_coding	cytoplasmic FMR1 interacting protein 2 [Source:HGNC Symbol;Acc:HGNC:13760]	-2.06276	2.40377	0.00916662	0.0355194
ENSGALG00000006424	JADE2	chr13	15085600	15133192	-	protein_coding	jade family PHD finger 2 [Source:HGNC Symbol;Acc:HGNC:22984]	-3.50947	0.293003	7.59118e-07	1.19877e-05
ENSGALG00000004449	cyp3A37	chr14	3919206	3928547	-	protein_coding	cytochrome P450 A 37 [Source:RefSeq peptide;Acc:NP_001001751]	-2.0179	-0.116166	0.00361778	0.0166931
ENSGALG00000007278	GRIN2A	chr14	9244461	9392231	+	protein_coding	glutamate receptor, ionotropic, N-methyl D-aspartate 2A [Source:HGNC Symbol;Acc:HGNC:4585]	-2.21561	1.63659	0.00385287	0.0175336
ENSGALG00000013170	GSG1L	chr14	11811444	11867036	+	protein_coding	GSG1-like [Source:HGNC Symbol;Acc:HGNC:28283]	-2.13834	0.474771	0.00391621	0.0177369
ENSGALG00000023707	DNASE1L2	chr14	12310668	12313707	-	protein_coding	deoxyribonuclease I-like 2 [Source:HGNC Symbol;Acc:HGNC:2958]	-2.81115	-0.310126	1.75427e-07	3.22008e-06
ENSGALG00000007838	NLRC3	chr14	12754966	12764508	+	protein_coding	NLR family, CARD domain containing 3 [Source:HGNC Symbol;Acc:HGNC:29889]	-2.56189	-0.331782	2.62169e-06	3.61132e-05
ENSGALG00000004970	SVOP	chr15	6610623	6628850	-	protein_coding	SV2 related protein homolog (rat) [Source:HGNC Symbol;Acc:HGNC:25417]	-2.39166	2.38587	0.000155488	0.00122363
ENSGALG00000005379		chr15	6834753	6937004	+	protein_coding	Uncharacterized protein [Source:UniProtKB/TrEMBL;Acc:F1NXW4]	-2.46547	0.423976	0.00141747	0.00784096
ENSGALG00000026086	CRYBB2	chr15	6996738	6998847	+	protein_coding	beta-crystallin B2 [Source:RefSeq peptide;Acc:NP_990506]	-7.97994	1.83447	5.88821e-29	2.54157e-26
ENSGALG00000006719	GNAZ	chr15	8701230	8728679	-	protein_coding	guanine nucleotide binding protein (G protein), alpha z polypeptide [Source:HGNC Symbol;Acc:HGNC:4395]	-2.07167	3.50697	0.000125715	0.00102618
ENSGALG00000028023	LRRC74B	chr15	10068970	10078928	+	protein_coding	leucine rich repeat containing 74B [Source:HGNC Symbol;Acc:HGNC:34301]	-2.46597	2.15437	1.38508e-06	2.03812e-05
ENSGALG00000024372	BFIV21	chr16	59616	62099	+	protein_coding	MHC BF2 class I precursor [Source:RefSeq peptide;Acc:NP_001026509]	-2.04645	2.8863	6.73646e-09	1.6291e-07
ENSGALG00000000136	Blec2	chr16	108301	110805	+	protein_coding	putative NK receptor [Source:RefSeq peptide;Acc:NP_001038147]	-2.67158	-0.0856899	1.70682e-05	0.000185729
ENSGALG00000026574	POUV	chr17	460123	461472	-	protein_coding	POU domain, class 5, transcription factor 1 [Source:RefSeq peptide;Acc:NP_001103648]	-2.30693	2.72587	9.3216e-13	4.26935e-11
ENSGALG00000008822		chr17	1527858	1529074	-	protein_coding	Uncharacterized protein [Source:UniProtKB/TrEMBL;Acc:F1NPF8]	-2.7056	-0.0921569	4.42429e-06	5.71866e-05
ENSGALG00000002955	ADAMTSL2	chr17	6972901	6991273	+	protein_coding	ADAMTS-like 2 [Source:HGNC Symbol;Acc:HGNC:14631]	-2.14873	2.52274	0.00132361	0.00741972
ENSGALG00000001080	NR5A1	chr17	9429011	9444852	-	protein_coding	steroidogenic factor 1 [Source:RefSeq peptide;Acc:NP_990408]	-3.534	0.251883	1.72158e-08	3.85569e-07
ENSGALG00000000936	LMX1B	chr17	10059278	10152878	+	protein_coding	LIM/homeobox protein LMX-1.2 [Source:RefSeq peptide;Acc:NP_990689]	-2.36453	4.93469	1.99503e-12	8.61128e-11
ENSGALG00000026748	MYH1A	chr18	433290	451636	-	protein_coding	myosin, heavy chain 1A, skeletal muscle (similar to human myosin, heavy chain 1, skeletal muscle, adult) [Source:RefSeq peptide;Acc:NP_001013414]	-3.55053	-0.193416	1.25227e-10	3.95508e-09
ENSGALG00000027177	MYH1C	chr18	584154	601425	-	protein_coding	myosin, heavy chain 1C, skeletal muscle (similar to human myosin, heavy chain 1, skeletal muscle, adult) [Source:RefSeq peptide;Acc:NP_001107181]	-2.73546	-0.297005	1.10066e-06	1.66785e-05
ENSGALG00000017910	U6	chr18	3449567	3449673	-	snRNA	U6 spliceosomal RNA [Source:RFAM;Acc:RF00026]	-2.15474	0.961785	1.86487e-39	3.32041e-36
ENSGALG00000001955	AANAT	chr18	4348390	4352215	-	protein_coding	Serotonin N-acetyltransferase [Source:UniProtKB/Swiss-Prot;Acc:P79774]	-2.89302	-0.172906	6.27634e-07	1.01131e-05
ENSGALG00000003105	ANKFN1	chr18	6080249	6129240	+	protein_coding	ankyrin-repeat and fibronectin type III domain containing 1 [Source:HGNC Symbol;Acc:HGNC:26766]	-2.14522	1.07972	0.0049128	0.0214328
ENSGALG00000003426	RHBDL3	chr18	6678617	6695673	+	protein_coding	rhomboid, veinlet-like 3 (Drosophila) [Source:HGNC Symbol;Acc:HGNC:16502]	-2.09164	-0.181902	0.00164101	0.00879292
ENSGALG00000021399		chr18	8181915	8205387	-	protein_coding	Uncharacterized protein [Source:UniProtKB/TrEMBL;Acc:F1NW73]	-2.01951	0.336028	0.0113279	0.0420633
ENSGALG00000006988	RNF213	chr18	9771940	9818172	-	protein_coding	ring finger protein 213 [Source:HGNC Symbol;Acc:HGNC:14539]	-2.09147	0.997359	0.0057131	0.02427
ENSGALG00000007770	FADS6	chr18	10796506	10800958	-	protein_coding	fatty acid desaturase 6 [Source:HGNC Symbol;Acc:HGNC:30459]	-2.88883	-0.0286821	9.16622e-06	0.000107726
ENSGALG00000000956	CCL4	chr19	352190	372634	+	protein_coding	chemokine-like ligand 1 precursor [Source:RefSeq peptide;Acc:NP_001039296]	-5.6681	0.129674	1.81743e-36	1.99746e-33
ENSGALG00000000865	TRIM27	chr19	353752	359048	+	protein_coding	tripartite motif containing 27 [Source:HGNC Symbol;Acc:HGNC:9975]	-2.13266	1.19249	0.00724085	0.0293335
ENSGALG00000028193	2017-09-04	chr19	821428	828033	+	protein_coding	septin 4 [Source:HGNC Symbol;Acc:HGNC:9165]	-2.14462	0.169316	0.00224471	0.0113623
ENSGALG00000002558	ASL1	chr19	4945236	4952988	-	protein_coding	Delta-1 crystallin [Source:UniProtKB/Swiss-Prot;Acc:P02521]	-2.10488	4.31879	1.17506e-07	2.26489e-06
ENSGALG00000004246	SLC6A4	chr19	6201884	6214012	-	protein_coding	sodium-dependent serotonin transporter [Source:RefSeq peptide;Acc:NP_998737]	-2.19492	1.56673	0.00114818	0.00659465
ENSGALG00000004649	TRPV1	chr19	6662820	6673391	+	protein_coding	transient receptor potential cation channel subfamily V member 1 [Source:RefSeq peptide;Acc:NP_989903]	-2.10122	0.0878956	0.00445796	0.0197694
ENSGALG00000005995	SLC13A5	chr19	9774089	9789405	+	protein_coding	solute carrier family 13 (sodium-dependent citrate transporter), member 5 [Source:HGNC Symbol;Acc:HGNC:23089]	-2.7516	0.743095	0.000110481	0.000918138
ENSGALG00000027603	ZHX3	chr20	5280566	5284670	-	protein_coding	zinc fingers and homeoboxes 3 [Source:HGNC Symbol;Acc:HGNC:15935]	-2.17023	0.595773	0.0021714	0.0110226
ENSGALG00000004074	KCNS1	chr20	5520686	5526950	+	protein_coding	potassium voltage-gated channel, modifier subfamily S, member 1 [Source:HGNC Symbol;Acc:HGNC:6300]	-2.04442	0.689966	0.00504332	0.0218882
ENSGALG00000005524	NTSR1	chr20	8575357	8620192	+	protein_coding	neurotensin receptor type 1 [Source:RefSeq peptide;Acc:NP_001232911]	-2.78087	-0.0298796	1.3215e-05	0.000148099
ENSGALG00000006106		chr20	9998639	10003173	-	protein_coding	Uncharacterized protein [Source:UniProtKB/TrEMBL;Acc:F1NCY6]	-2.22275	0.420421	0.00386916	0.0175761
ENSGALG00000020895		chr20	12415877	12444994	+	protein_coding	Uncharacterized protein [Source:UniProtKB/TrEMBL;Acc:E1BVU8]	-2.8467	0.700807	0.000183016	0.00140305
ENSGALG00000008014	CEBPB	chr20	14054696	14055682	-	protein_coding	CCAAT/enhancer-binding protein beta [Source:UniProtKB/Swiss-Prot;Acc:Q05826]	-3.02772	1.75182	1.61734e-11	5.87687e-10
ENSGALG00000001527	VWA1	chr21	2174951	2188556	-	protein_coding	von Willebrand factor A domain containing 1 [Source:HGNC Symbol;Acc:HGNC:30910]	-2.70066	0.361576	0.000170827	0.00132314
ENSGALG00000003713		chr21	4312361	4316769	+	protein_coding	Chloride channel protein [Source:UniProtKB/TrEMBL;Acc:E1BS59]	-2.65281	0.51751	0.000372967	0.00255035
ENSGALG00000003782	Pax-7	chr21	4442610	4530774	+	protein_coding	paired box protein Pax-7 [Source:RefSeq peptide;Acc:NP_990396]	-2.03246	5.31219	3.09688e-06	4.17332e-05
ENSGALG00000004066	HTR6	chr21	4776632	4780155	+	protein_coding	5-hydroxytryptamine receptor 6 [Source:RefSeq peptide;Acc:NP_001166911]	-2.94897	-0.0122496	5.47029e-06	6.9077e-05
ENSGALG00000004426	TNFRSF8	chr21	5468760	5481849	-	protein_coding	tumor necrosis factor receptor superfamily member 8 precursor [Source:RefSeq peptide;Acc:NP_989775]	-2.87572	0.512635	0.000146958	0.00116552
ENSGALG00000003444		chr22	2443241	2448175	+	protein_coding	Uncharacterized protein [Source:UniProtKB/TrEMBL;Acc:F1NPZ3]	-2.18122	-0.0512931	0.00144585	0.00796702
ENSGALG00000013953	ASPR	chr22	2915445	2927562	+	protein_coding	substance-P receptor [Source:RefSeq peptide;Acc:NP_990199]	-3.56727	1.40147	2.54589e-06	3.53102e-05
ENSGALG00000000667	EDN2	chr23	950279	955659	+	protein_coding	endothelin-2 precursor [Source:RefSeq peptide;Acc:NP_001185584]	-6.83841	0.664769	1.33772e-31	8.66115e-29
ENSGALG00000003174	RIMS3	chr23	4853152	4855812	-	protein_coding	regulating synaptic membrane exocytosis 3 [Source:HGNC Symbol;Acc:HGNC:21292]	-2.81752	-0.108873	1.77979e-05	0.000192639
ENSGALG00000000421	HEPACAM	chr24	235948	239677	+	protein_coding	hepatic and glial cell adhesion molecule [Source:HGNC Symbol;Acc:HGNC:26361]	-2.32942	-0.221223	0.000118288	0.000971681
ENSGALG00000027164		chr24	5515277	5527369	+	protein_coding	Uncharacterized protein [Source:UniProtKB/TrEMBL;Acc:R4GGH2]	-4.63414	0.364592	1.86376e-10	5.66043e-09
ENSGALG00000000443		chr25	205888	214237	-	protein_coding	Uncharacterized protein [Source:UniProtKB/TrEMBL;Acc:H9KYU0]	-3.17007	0.223674	1.31704e-06	1.94726e-05
ENSGALG00000027316	CRNN	chr25	1132880	1134156	+	protein_coding	cornulin [Source:RefSeq peptide;Acc:NP_001165847]	-2.38899	1.06204	0.000537653	0.00347159
ENSGALG00000006370	Tulp	chr26	55541	59279	-	protein_coding	tubby-related protein 1 [Source:RefSeq peptide;Acc:NP_989946]	-3.12908	0.014079	7.99011e-06	9.604e-05
ENSGALG00000028318	CDKN1A	chr26	1543127	1545030	+	protein_coding	cdk inhibitor CIP1 (p21) [Source:RefSeq peptide;Acc:NP_989727]	-2.82601	5.00037	1.08583e-07	2.10744e-06
ENSGALG00000000656	TMEM81	chr26	1953427	1954203	-	protein_coding	transmembrane protein 81 [Source:HGNC Symbol;Acc:HGNC:32349]	-2.01832	-0.375238	3.69301e-05	0.000362032
ENSGALG00000000892	IL10	chr26	2504099	2506388	-	protein_coding	Interleukin-10 [Source:UniProtKB/Swiss-Prot;Acc:Q6A2H4]	-3.37668	-0.340389	7.72816e-19	9.02295e-17
ENSGALG00000000919	PIGR	chr26	2520032	2531914	-	protein_coding	polymeric immunoglobulin receptor precursor [Source:RefSeq peptide;Acc:NP_001038109]	-3.12479	-0.167013	7.43275e-08	1.49548e-06
ENSGALG00000001605	PPM1J	chr26	3499167	3506175	-	protein_coding	protein phosphatase, Mg2+/Mn2+ dependent, 1J [Source:HGNC Symbol;Acc:HGNC:20785]	-2.13717	0.470337	0.00495424	0.0215739
ENSGALG00000000870	DCAKD	chr27	1335387	1488476	-	protein_coding	dephospho-CoA kinase domain containing [Source:HGNC Symbol;Acc:HGNC:26238]	-2.46013	1.83707	4.30181e-07	7.26008e-06
ENSGALG00000019824		chr27	2153765	2179370	-	protein_coding	Uncharacterized protein [Source:UniProtKB/TrEMBL;Acc:F1NBJ4]	-3.23709	-0.141086	2.495e-07	4.39294e-06
ENSGALG00000019738	FBXO47	chr27	4074753	4081564	-	protein_coding	F-box protein 47 [Source:HGNC Symbol;Acc:HGNC:31969]	-5.13211	-0.0306174	2.38767e-30	1.21464e-27
ENSGALG00000028044	ADMP	chr28	899423	901661	-	protein_coding	anti-dorsalizing morphogenetic protein precursor [Source:RefSeq peptide;Acc:NP_990153]	-2.38401	-0.35023	5.44705e-06	6.88445e-05
ENSGALG00000013371	S1PR4	chr28	1215840	1216976	+	protein_coding	sphingosine-1-phosphate receptor 4 [Source:HGNC Symbol;Acc:HGNC:3170]	-2.13994	-0.268964	0.000616719	0.00388353
ENSGALG00000000803		chr28	1894155	1896857	+	protein_coding	Uncharacterized protein [Source:UniProtKB/TrEMBL;Acc:E1C069]	-2.48082	0.0822195	0.000601658	0.00381568
ENSGALG00000015192	GZMM	chr28	3113569	3115852	-	protein_coding	granzyme M (lymphocyte met-ase 1) [Source:HGNC Symbol;Acc:HGNC:4712]	-2.35104	-0.243161	7.65559e-07	1.20753e-05
ENSGALG00000024292		chr28	3363587	3367621	+	protein_coding	Uncharacterized protein [Source:UniProtKB/TrEMBL;Acc:E1BRG0]	-2.04854	-0.265279	3.23504e-05	0.000320445
ENSGALG00000026156	U6	chr28	4726981	4727087	+	snRNA	U6 spliceosomal RNA [Source:RFAM;Acc:RF00026]	-2.13392	0.757593	8.71408e-42	3.10308e-38
ENSGALG00000001705	SLC14A2	chrZ	2251638	2289905	-	protein_coding	solute carrier family 14 (urea transporter), member 2 [Source:HGNC Symbol;Acc:HGNC:10919]	-2.47514	0.744957	0.00135309	0.0075493
ENSGALG00000008893	SYT4	chrZ	3411089	3422336	+	protein_coding	synaptotagmin IV [Source:HGNC Symbol;Acc:HGNC:11512]	-2.09843	0.693506	0.00888022	0.034706
ENSGALG00000003432	AGXT2	chrZ	10443349	10455857	-	protein_coding	alanine--glyoxylate aminotransferase 2 [Source:HGNC Symbol;Acc:HGNC:14412]	-3.23737	0.311516	3.36672e-06	4.50286e-05
ENSGALG00000021304	RANBP3L	chrZ	10886299	10913615	-	protein_coding	RAN binding protein 3-like [Source:HGNC Symbol;Acc:HGNC:26353]	-4.47723	1.18823	5.45975e-10	1.5461e-08
ENSGALG00000014713	DDX4	chrZ	16787971	16819236	+	protein_coding	probable ATP-dependent RNA helicase DDX4 [Source:RefSeq peptide;Acc:NP_990039]	-5.78735	1.3475	4.79037e-15	3.18851e-13
ENSGALG00000014717	ANKRD55	chrZ	16950760	17001487	-	protein_coding	ankyrin repeat domain 55 [Source:HGNC Symbol;Acc:HGNC:25681]	-3.30049	-0.337312	3.59427e-16	2.81301e-14
ENSGALG00000010180	GLIS3	chrZ	26708083	26866140	-	protein_coding	GLIS family zinc finger 3 [Source:HGNC Symbol;Acc:HGNC:28510]	-3.9397	0.916428	9.48548e-09	2.22222e-07
ENSGALG00000019756	MLANA	chrZ	27673375	27679075	+	protein_coding	melan-A [Source:HGNC Symbol;Acc:HGNC:7124]	-2.28594	0.225638	0.000565818	0.00362551
ENSGALG00000026668		chrZ	34151392	34267309	-	protein_coding	Uncharacterized protein [Source:UniProtKB/TrEMBL;Acc:R4GJR3]	-2.13588	-0.225932	0.000139552	0.00111298
ENSGALG00000000184	SLC27A6	chrZ	45459381	45499133	-	protein_coding	solute carrier family 27 (fatty acid transporter), member 6 [Source:HGNC Symbol;Acc:HGNC:11000]	-2.47433	0.142487	0.000340874	0.00236373
ENSGALG00000015384	CHRNB3	chrZ	53438862	53449521	-	protein_coding	neuronal acetylcholine receptor subunit beta-3 precursor [Source:RefSeq peptide;Acc:NP_990143]	-4.74632	-0.133439	2.49805e-25	7.90716e-23
ENSGALG00000028673	2017-03-03	chrZ	56064526	56093305	-	protein_coding	membrane-associated ring finger (C3HC4) 3, E3 ubiquitin protein ligase [Source:HGNC Symbol;Acc:HGNC:28728]	-2.00342	2.05327	0.00268715	0.0131804
ENSGALG00000014668	MCTP1	chrZ	57356431	57528682	+	protein_coding	multiple C2 domains, transmembrane 1 [Source:HGNC Symbol;Acc:HGNC:26183]	-2.02962	0.0602962	0.00472907	0.0207775
ENSGALG00000015753		chrZ	66848485	66896689	+	protein_coding	Guanylate cyclase [Source:UniProtKB/TrEMBL;Acc:F1NDM7]	-2.87232	-0.350442	1.47486e-10	4.55703e-09
ENSGALG00000024328	FSTL3	chr28_AADN03011125_random	4326	12938	-	protein_coding	follistatin-like 3 (secreted glycoprotein) [Source:HGNC Symbol;Acc:HGNC:3973]	-2.7349	-0.150717	2.48664e-05	0.000256122
ENSGALG00000012428		chrUn_AADN03012816	6975	13031	-	protein_coding	Uncharacterized protein [Source:UniProtKB/TrEMBL;Acc:F1NDX6]	-2.04163	0.266712	0.000400767	0.00270546
ENSGALG00000028160		chrUn_AADN03020473	21	1839	+	protein_coding	Uncharacterized protein [Source:UniProtKB/TrEMBL;Acc:R4GIY0]	-2.6256	-0.0134804	1.88208e-08	4.18881e-07
ENSGALG00000028826	ABHD8	chrUn_JH375512	13692	20382	-	protein_coding	abhydrolase domain containing 8 [Source:HGNC Symbol;Acc:HGNC:23759]	-2.12099	0.812325	0.000326742	0.00228703
ENSGALG00000028085	JAK3	chrUn_JH375547	40253	46751	+	protein_coding	Gallus gallus Janus kinase 3 (JAK3), mRNA. [Source:RefSeq mRNA;Acc:NM_204996]	-2.58865	0.76663	0.000125566	0.00102555
ENSGALG00000029124	PDE1B	chrUn_JH375635	21	6141	-	protein_coding	phosphodiesterase 1B, calmodulin-dependent [Source:HGNC Symbol;Acc:HGNC:8775]	-3.85051	-0.180935	1.68799e-14	1.03192e-12
