# Supplementary material for: Single-cell transcriptome analysis of avian neural crest migration reveals signatures of invasion and molecular transitions
Source: eLife. 2017 Dec 4;6:e28415. doi: 10.7554/eLife.28415 (PMC5728719; doi:10.7554/eLife.28415)
Supplement: Figure 4—source data 1. — All differential expression thresholds were set at log2 FC greater than 2 or less than −2 and adjusted p value less than 0.05. Individual comparisons of invasive front subpopulations to all other cells isolated in vivo are displayed as individual tabs within the spreadsheet. Mean RPKM and the percentage of cells within each subpopulation that express each gene are also listed. [file elife-28415-fig4-data1.xlsx]

## Sheet: List of Tabs
List of Tabs
DEG_info_HH11_cluster1_dn.txt
DEG_info_HH11_cluster1_up.txt
DEG_info_HH11_cluster2_dn.txt
DEG_info_HH11_cluster2_up.txt
DEG_info_HH13_Lead_like_dn.txt
DEG_info_HH13_Lead_like_up.txt
DEG_info_HH15_Lead_like_dn.txt
DEG_info_HH15_Lead_like_up.txt
DEG_info_Trailblazer_dn.txt
DEG_info_Trailblazer_up.txt
DEG_HHSt11_Cluster1_vs_Cluster2.txt

## Sheet: DEG_info_HH11_cluster1_dn.txt
ensid	Name	HH11 Cluster 1_v_other_DE.dn.HH11 Cluster 1_v_other.log2fc	HH11 Cluster 1_v_other_DE.dn.HH11 Cluster 1_v_other.padj	mean_rpkm	pct_above_0_rpkm
ENSGALG00000011205	SMOC2	-9.91681	2.0686e-12	0.0179832	0.1
ENSGALG00000009002	CPED1	-9.78209	0.000581371	0	0
ENSGALG00000000242	EBF2	-9.70515	4.34984e-06	0.0245859	0.15
ENSGALG00000011271	LUM	-9.32403	0.00882733	0.0747579	0.1
ENSGALG00000001617	CAMKK1	-9.09079	0.000681281	0	0
ENSGALG00000002223	LHX9	-8.97789	0.00354785	0	0
ENSGALG00000019470	MSC	-8.85069	0.0239356	0	0
ENSGALG00000010521	COL25A1	-8.84258	3.48622e-06	0	0
ENSGALG00000006343	ACTG2	-8.7994	0.00111407	0.464724	0.3
ENSGALG00000016558	FIGF	-8.76365	0.00464365	0.0484571	0.15
ENSGALG00000010435	RASGRP3	-8.69485	0.00267316	0.00909656	0.05
ENSGALG00000007047	GAL	-8.4507	9.46652e-06	0.053061	0.1
ENSGALG00000009880	INPP4B	-8.3553	0.00435298	0	0
ENSGALG00000004508	EYA2	-8.29199	1.42666e-06	0.093174	0.15
ENSGALG00000005763	VILL	-8.27786	0.0357843	0	0
ENSGALG00000016635	MXRA5	-8.23344	0.0419241	0.0060184	0.05
ENSGALG00000011855	RHOJ	-8.10357	4.08811e-08	0	0
ENSGALG00000012290	SOX10	-8.0333	5.99939e-06	0.275485	0.75
ENSGALG00000002012	MMRN2	-7.99505	0.000681281	0.0112613	0.1
ENSGALG00000008349	LMCD1	-7.99337	0.000200326	0	0
ENSGALG00000022964		-7.98333	0.000998228	0	0
ENSGALG00000012023	DACT1	-7.97985	0.00954203	0.0121266	0.1
ENSGALG00000015440	RCSD1	-7.97927	0.0469608	0	0
ENSGALG00000015388	Blimp-1	-7.88653	0.0118043	0.00824133	0.05
ENSGALG00000008043	CORO2B	-7.87687	0.0282862	0	0
ENSGALG00000006351	FAS	-7.79644	0.0295522	0.0377501	0.05
ENSGALG00000001161	FLI1	-7.76073	0.00113009	0.0857897	0.2
ENSGALG00000018439	DLX1	-7.72761	0.0072796	0.0766603	0.05
ENSGALG00000006346	JSC	-7.70692	1.91311e-06	0.724449	0.65
ENSGALG00000016797	FHL2	-7.61806	0.0478458	0.00809023	0.05
ENSGALG00000011926		-7.60861	0.000588849	0.0286178	0.2
ENSGALG00000000620	FABP3	-7.58613	6.57519e-07	0.2555	0.1
ENSGALG00000006473	PLXNA4	-7.54032	0.00161158	0.0534413	0.3
ENSGALG00000007113	TNC	-7.5026	7.39889e-05	0.0290303	0.4
ENSGALG00000010461	EBF3	-7.49824	1.50971e-06	0.189059	0.35
ENSGALG00000011911		-7.45408	0.023472	0	0
ENSGALG00000007690	TFAP2C	-7.31976	0.0294371	0.0376807	0.25
ENSGALG00000011299	KIF25	-7.24765	0.000167444	0.0840749	0.15
ENSGALG00000015166	GCNT1	-7.18615	0.0483527	0.0376932	0.1
ENSGALG00000005792	ABCG2	-7.18211	0.0364935	0.0464493	0.05
ENSGALG00000006756		-7.12317	0.0116706	0.0248358	0.1
ENSGALG00000022994	SIX1	-6.9878	0.00118622	0.139361	0.1
ENSGALG00000013803	GPR126	-6.98189	0.0125019	0	0
ENSGALG00000014645	MEF2C	-6.9526	7.92467e-08	0.0832267	0.15
ENSGALG00000004575	STARD8	-6.92942	0.00541492	0.0189812	0.05
ENSGALG00000009478	BCHE	-6.92299	0.0114607	0.0322041	0.15
ENSGALG00000027694		-6.86391	0.0319877	0	0
ENSGALG00000007078	ENTPD1	-6.85259	0.0199733	0.0213501	0.1
ENSGALG00000008250	TBX3	-6.68698	0.000236822	0.00462956	0.05
ENSGALG00000003612	RNLS	-6.65799	0.0384918	0	0
ENSGALG00000014652	KIAA0907	-6.65458	0.000469896	0.0699198	0.25
ENSGALG00000012732	PHACTR1	-6.5688	1.4946e-06	0.11856	0.2
ENSGALG00000009740	RASGRP1	-6.53068	0.0027537	0.0730242	0.15
ENSGALG00000022819	PCP4	-6.50569	3.87678e-06	0.471031	0.05
ENSGALG00000008856		-6.46954	0.00214159	0.0261002	0.15
ENSGALG00000012374	FRMD6	-6.44143	0.0147125	0.0182608	0.05
ENSGALG00000014815	EMILIN2	-6.4165	0.0364935	0.0395122	0.2
ENSGALG00000008018	SNAI1	-6.29942	0.000155962	0.887145	0.35
ENSGALG00000023872	FAM129B	-6.16778	0.0221627	0	0
ENSGALG00000012173	LGALS3	-6.11923	0.00382876	0.201745	0.15
ENSGALG00000002393	TFAP2E	-6.11482	0.0300425	0.0404345	0.1
ENSGALG00000007579	APBB1IP	-6.02235	0.0283274	0	0
ENSGALG00000022940	FOXC2	-5.96042	0.0135346	0	0
ENSGALG00000016680	TFAP2B	-5.87941	3.68865e-06	2.37231	0.65
ENSGALG00000027554	HLX	-5.83422	0.046182	0	0
ENSGALG00000026862	CLDN1	-5.81792	0.00888585	3.17819	0.55
ENSGALG00000010071	MAB21L2	-5.77177	0.0106519	0.0289243	0.1
ENSGALG00000009129	DLX5	-5.65338	2.39195e-07	1.00605	0.25
ENSGALG00000028339	AMIGO3	-5.60658	0.0138713	0.170219	0.4
ENSGALG00000013892	MAP3K5	-5.55095	0.00512569	0.106729	0.4
ENSGALG00000023444		-5.54072	9.50408e-07	0.784634	0.3
ENSGALG00000028635	AIF1L	-5.43997	0.0271526	0.47817	0.15
ENSGALG00000012623	CFC1B	-5.43424	1.39395e-05	0.940745	0.4
ENSGALG00000012747	NEDD9	-5.39732	0.00066988	0.907052	0.6
ENSGALG00000009424	foxp2	-5.30117	0.0382847	0.130142	0.2
ENSGALG00000005628	COL9A3	-5.22611	1.50587e-05	0.87488	0.75
ENSGALG00000028236	PRRX2	-5.2076	0.0108713	0.110744	0.05
ENSGALG00000025702	5S_rRNA	-5.20153	0.00161992	0	0
ENSGALG00000013071	CALD1	-5.12789	0.000190302	0.846134	0.45
ENSGALG00000008118	RFTN2	-5.08834	4.9881e-06	1.12435	0.3
ENSGALG00000021610	F2RL3	-5.02926	0.0288361	0	0
ENSGALG00000005278	CDH11	-4.94386	3.59586e-13	2.56374	0.9
ENSGALG00000016912	EDNRB	-4.90645	0.0213802	0.29512	0.15
ENSGALG00000027737	CIDEA	-4.88712	0.00898488	0.234629	0.65
ENSGALG00000014727	PDE4D	-4.72432	0.0383122	0.0983945	0.25
ENSGALG00000028657		-4.68374	0.0142074	0	0
ENSGALG00000000379	ITGB3	-4.67451	2.1219e-06	3.77426	0.75
ENSGALG00000018702		-4.66381	0.00210224	1.4285	0.2
ENSGALG00000027677	DLX3	-4.61112	0.0112007	0.023141	0.1
ENSGALG00000027311	NGFR	-4.54244	0.00334542	0.172527	0.15
ENSGALG00000011566	GYPC	-4.51183	0.000998228	1.5006	0.25
ENSGALG00000013929	PDGFRA	-4.4924	0.00113236	0.625145	0.35
ENSGALG00000010986	GNG4	-4.48244	4.74159e-05	2.09974	0.15
ENSGALG00000005331	GJC2	-4.39946	0.02422	0.337594	0.05
ENSGALG00000014933	HEXB	-4.39855	5.53474e-07	4.55078	0.5
ENSGALG00000010107	FHDC1	-4.36688	0.0197111	0.131225	0.25
ENSGALG00000006805		-4.36573	0.00131884	1.03036	0.25
ENSGALG00000016210	ST3GAL1	-4.26058	0.0319877	0.681399	0.1
ENSGALG00000015729	LPAR1	-4.20579	0.0355379	1.30961	0.25
ENSGALG00000022733	ARL11	-4.19554	0.0495838	0.441339	0.15
ENSGALG00000001916	SLIT3	-4.11082	0.00168124	0.555057	0.4
ENSGALG00000007837	KAZALD1	-4.07694	0.0382928	1.23288	0.3
ENSGALG00000003406	RXRG	-3.95857	0.00307759	2.93828	0.45
ENSGALG00000027031		-3.93089	0.00293986	0	0
ENSGALG00000013948	RASL11B	-3.84214	0.000155605	5.21889	0.45
ENSGALG00000003324	PRRX1	-3.82575	0.0217466	0.665709	0.25
ENSGALG00000027460	gga-mir-6621	-3.81324	0.0452396	0	0
ENSGALG00000029047	TMEM204	-3.8002	0.00128254	1.29664	0.7
ENSGALG00000013478	S100A13	-3.73314	0.0449151	0.3571	0.15
ENSGALG00000006447	PHLDA2	-3.70517	0.00210224	1.86128	0.45
ENSGALG00000007728		-3.69112	0.0170223	1.11107	0.25
ENSGALG00000002802	PACSIN1	-3.66489	0.00254026	0.523634	0.2
ENSGALG00000000883	MAPKAPK2	-3.64065	0.00693869	0.0601185	0.3
ENSGALG00000002664	ANXA11	-3.63687	0.000377455	2.82352	0.45
ENSGALG00000003770	Protein	-3.62716	0.00506427	4.09163	0.5
ENSGALG00000001143	ETS1	-3.60295	0.00849213	1.73058	0.2
ENSGALG00000005848	IL11Ra	-3.52042	0.0215417	0.526551	0.2
ENSGALG00000026059	TWIST1	-3.52036	0.00288444	0.246088	0.1
ENSGALG00000001138		-3.50227	0.00541492	0.801102	0.1
ENSGALG00000011709	TMEM108	-3.47802	8.83339e-05	3.99175	0.45
ENSGALG00000018243	gga-let-7c	-3.43777	0.0387555	0	0
ENSGALG00000009052	LBH	-3.43737	0.00290393	3.05517	0.65
ENSGALG00000009090	UAP1L1	-3.33146	0.00224506	1.87374	0.7
ENSGALG00000000608	CDH1	-3.22659	0.0263132	0.26187	0.75
ENSGALG00000011288	DACT2	-3.17479	0.023472	11.2938	0.8
ENSGALG00000004521	GPX3	-3.17424	0.0156149	2.28158	0.45
ENSGALG00000003932	SDC4	-3.16186	0.028454	3.81244	0.3
ENSGALG00000003193	CRABP-I	-3.1389	0.000664571	56.2257	0.95
ENSGALG00000006341	SLC25A48	-3.06107	0.000616704	0.654447	0.85
ENSGALG00000010738	TC2N	-3.03438	0.0135828	0.200652	0.8
ENSGALG00000013715	DLC1	-2.96038	0.0142857	1.94975	0.6
ENSGALG00000011435	ELK3	-2.94723	8.70194e-06	6.63468	0.9
ENSGALG00000001805	MXRA7	-2.89987	0.00182858	1.79913	0.45
ENSGALG00000014758	ARHGAP28	-2.86913	0.011237	1.93169	0.2
ENSGALG00000015622	EYA1	-2.85733	0.0202539	2.54369	0.45
ENSGALG00000026838	MDFIC	-2.85021	0.0138277	1.55595	0.3
ENSGALG00000008293	SH3PXD2A	-2.84341	0.00846799	2.72079	0.65
ENSGALG00000005503	WFDC1	-2.81971	0.0227053	5.1388	0.45
ENSGALG00000011086	ACTA1	-2.81041	0.0262979	6.52243	0.95
ENSGALG00000016906	SPRY2	-2.79104	7.82456e-05	4.05283	0.75
ENSGALG00000003699	EBF1	-2.78549	0.00798965	2.32467	0.25
ENSGALG00000004724		-2.7854	0.0227053	4.61748	0.45
ENSGALG00000026864	ZCCHC24	-2.76936	0.000138559	4.44755	0.75
ENSGALG00000026714	SHISA2	-2.76793	0.0108577	6.73298	0.75
ENSGALG00000008910	CERKL	-2.73331	0.00321074	2.08019	0.6
ENSGALG00000027684	TUBB6	-2.69573	0.0427468	6.85381	0.7
ENSGALG00000026184	CREG1	-2.69152	0.0109872	3.96233	0.45
ENSGALG00000016800	C2orf40	-2.64591	0.00120756	6.80408	0.85
ENSGALG00000008407	IRAK2	-2.56847	0.000582518	2.80951	0.7
ENSGALG00000013760	GFPT2	-2.49502	0.00122789	8.10919	0.75
ENSGALG00000010410	PFN2	-2.48507	1.33372e-06	17.8781	0.85
ENSGALG00000027364	HEY1	-2.45049	0.000140206	20.5654	0.8
ENSGALG00000012834	AKR1D1	-2.39401	0.0115484	27.5055	0.9
ENSGALG00000006252	LMO4	-2.39046	0.0138713	0.915311	0.65
ENSGALG00000014770	EPB41L3	-2.38963	0.0409116	3.13544	0.45
ENSGALG00000014930	ENC1	-2.37231	0.0382545	7.90332	0.55
ENSGALG00000007253	IL1RAP	-2.35996	0.00251788	21.3881	0.65
ENSGALG00000025862	TMEM26	-2.31861	0.0261785	4.6953	0.85
ENSGALG00000008469	SPINT1	-2.2834	0.0031193	8.11653	0.55
ENSGALG00000009163	S100A11	-2.27655	0.0279507	11.9273	0.65
ENSGALG00000026762	WBSCR27	-2.25699	0.0112244	2.67945	0.55
ENSGALG00000011715	hsp70	-2.21997	0.0118179	23.971	0.9
ENSGALG00000002521	UBA7	-2.21675	0.00752275	1.71541	0.5
ENSGALG00000025346	gga-mir-1762	-2.14237	0.00109475	4.0613	0.5
ENSGALG00000019198		-2.12697	0.0145725	10.8227	0.55
ENSGALG00000025365	gga-mir-1656	-2.1108	0.0179584	1.79759	0.1
ENSGALG00000026432		-2.09742	0.0184506	1.09853	0.1
ENSGALG00000011207	MKP3	-2.07345	0.00590728	5.82051	0.55
ENSGALG00000012342	SASH1	-2.04485	0.0378798	2.4425	0.8

## Sheet: DEG_info_HH11_cluster1_up.txt
ensid	Name	HH11 Cluster 1_v_other_DE.up.HH11 Cluster 1_v_other.log2fc	HH11 Cluster 1_v_other_DE.up.HH11 Cluster 1_v_other.padj	mean_rpkm	pct_above_0_rpkm
ENSGALG00000017238	GRM5	7.72672	5.58184e-35	2.36357	0.2
ENSGALG00000027821	APC2	7.18727	2.92358e-25	1.87585	0.5
ENSGALG00000004930	HRH1	7.03682	9.14643e-24	4.11696	0.15
ENSGALG00000013862	OLIG3	7.01861	3.09967e-14	14.4718	0.45
ENSGALG00000012542	RASD2	6.86193	7.04079e-14	13.5648	0.4
ENSGALG00000011612	GC	6.67248	1.09046e-26	3.22786	0.25
ENSGALG00000021589	RTN4RL1	6.49468	4.05714e-12	8.13718	0.45
ENSGALG00000029070	FAM181A	6.10678	1.77963e-15	22.8922	0.55
ENSGALG00000012906	CDH20	5.84524	7.30801e-07	4.50584	0.2
ENSGALG00000009562	PLEK2	5.76523	1.28772e-06	36.2897	0.3
ENSGALG00000003110		5.73159	2.44986e-19	1.92474	0.15
ENSGALG00000003957	APOH	5.68507	1.29345e-46	34.9627	0.85
ENSGALG00000006811	ZIC1	5.61253	4.3848e-08	18.5051	0.9
ENSGALG00000015826	HTR1E	5.60515	1.53465e-09	3.93138	0.3
ENSGALG00000001705	SLC14A2	5.52242	3.48622e-06	3.03507	0.15
ENSGALG00000017418	NPTX1	5.49375	2.00688e-10	1.60688	0.1
ENSGALG00000012566	SYN3	5.23222	2.90284e-07	2.22089	0.3
ENSGALG00000020193	PLAC8	5.19737	6.38615e-19	3.00105	0.15
ENSGALG00000012647	RFX4	5.18519	3.87678e-06	23.0182	0.95
ENSGALG00000012250		5.17939	8.75785e-10	1.75338	0.3
ENSGALG00000006497	ZIC3	5.12562	2.85286e-16	10.9707	1
ENSGALG00000007511	ITGB2	5.08358	0.00010907	2.5343	0.05
ENSGALG00000005985	GDF10	5.06934	0.000140206	17.977	0.45
ENSGALG00000006810		5.02173	1.8502e-08	5.73131	0.8
ENSGALG00000004083	GluR1/A	4.94715	3.63349e-05	7.73248	0.35
ENSGALG00000028616	CELSR2	4.90029	1.55287e-06	0.739155	0.35
ENSGALG00000010794	MEOX2	4.88085	7.12125e-05	2.54851	0.2
ENSGALG00000016556		4.85461	5.92669e-06	0.290173	0.05
ENSGALG00000028745		4.83999	1.8772e-05	2.56529	0.2
ENSGALG00000014908	FST	4.83976	8.94721e-07	204.904	0.7
ENSGALG00000005031	DRP2	4.82891	0.000266908	5.08108	0.25
ENSGALG00000028048	PTN	4.76636	1.10482e-17	450.705	1
ENSGALG00000006471	SLCO2A1	4.73064	0.000141866	2.8858	0.15
ENSGALG00000003105	ANKFN1	4.70921	0.000223023	4.70491	0.5
ENSGALG00000016954	RGCC	4.70678	4.33866e-14	168.822	0.9
ENSGALG00000006189	CRYGN	4.69683	2.88358e-06	9.07638	0.3
ENSGALG00000011236	BEGAIN	4.65187	5.6086e-05	1.33512	0.25
ENSGALG00000015143	TTR	4.6507	2.4091e-12	1.69634	0.1
ENSGALG00000027498		4.63181	5.9889e-08	1.8593	0.35
ENSGALG00000015746	JAM2	4.62744	3.2956e-16	197.386	1
ENSGALG00000026395	TRABD2A	4.60644	0.000240236	3.04992	0.25
ENSGALG00000003670		4.51663	3.43112e-10	26.8862	0.65
ENSGALG00000015593	EPHA7	4.49433	1.69347e-09	73.0201	0.95
ENSGALG00000006482	FAH	4.47942	0.00117007	12.179	0.35
ENSGALG00000004285	HNF4Trailblazer	4.47706	4.5347e-05	0.987663	0.05
ENSGALG00000016013	HTR7	4.47444	0.000302918	1.5227	0.05
ENSGALG00000014829	RSPO3	4.43404	0.000236822	21.3029	0.6
ENSGALG00000002652	FZD10	4.42196	3.48622e-06	78.3142	1
ENSGALG00000005396	Wnt3a	4.40237	0.00143658	10.8291	0.7
ENSGALG00000001079	Wnt3	4.38267	0.000156106	1.36463	0.15
ENSGALG00000010926	SPP1	4.37993	0.00134046	92.9947	0.4
ENSGALG00000019280	LMO3	4.34569	0.000288813	16.2776	0.75
ENSGALG00000013454	HOXB1	4.33126	0.00011036	21.1764	0.4
ENSGALG00000010139	SS1R	4.33105	0.000664571	4.04317	0.4
ENSGALG00000001608	UNC5D	4.32045	0.00112546	5.83715	0.45
ENSGALG00000010772	RGS7	4.31432	0.000475179	0.825765	0.15
ENSGALG00000008602	SLC39A12	4.29644	0.00106445	0.529367	0.05
ENSGALG00000012123	Pax-6	4.28884	1.40089e-05	35.5609	0.85
ENSGALG00000010933		4.28856	0.000125267	0.826463	0.15
ENSGALG00000014235	WNT7B	4.28395	0.00435298	2.95093	0.35
ENSGALG00000012917	CDH6	4.22709	0.000370384	22.5725	0.55
ENSGALG00000016805	SULT1C	4.22674	0.00541492	7.89649	0.3
ENSGALG00000012920		4.18573	2.0783e-05	3.66484	0.45
ENSGALG00000004840	RPH3A	4.18152	0.000155962	1.63054	0.4
ENSGALG00000025559	gga-mir-1677	4.1802	9.25283e-12	51.0973	0.8
ENSGALG00000002888	CASZ1	4.17372	0.00421652	3.60165	0.45
ENSGALG00000006575	VPAC2	4.17115	0.00185057	1.56371	0.1
ENSGALG00000009308	CNIH3	4.14773	0.00210655	6.33383	0.25
ENSGALG00000001370	ADAMTS8	4.1406	0.00143273	3.91315	0.2
ENSGALG00000000600	PTPN7	4.12746	0.00169871	17.0876	0.55
ENSGALG00000001662	ATP10B	4.12375	0.00382848	0.870872	0.15
ENSGALG00000016222	NDP	4.10959	0.000234194	29.1897	0.85
ENSGALG00000021875		4.09348	0.00122789	15.6611	0.4
ENSGALG00000016173	UBASH3A	4.0801	0.00367486	1.13123	0.05
ENSGALG00000015013	MSX1	4.06461	9.1329e-16	1143.43	1
ENSGALG00000028075	VSTM2A	4.06249	0.00131121	0.374227	0.1
ENSGALG00000003904	MLPH	4.06162	0.00575184	2.86221	0.35
ENSGALG00000006495		4.0482	1.29101e-05	2.1134	0.5
ENSGALG00000014997	PLA1A	4.02635	0.00824236	6.18308	0.2
ENSGALG00000004078		3.98947	0.00680126	1.6722	0.25
ENSGALG00000008290	VSIG1	3.97859	0.00104232	1.32944	0.1
ENSGALG00000006576	GRM3	3.96215	0.0182265	6.07242	0.2
ENSGALG00000013305	NXNL1	3.95645	0.0016331	3.80283	0.2
ENSGALG00000015523		3.92808	0.00220743	0.549375	0.2
ENSGALG00000013455	HOXB3	3.89557	0.00203079	2.16198	0.5
ENSGALG00000013376	CAPSL	3.85599	0.00253978	16.8733	0.55
ENSGALG00000010792	AGMO	3.84431	2.77409e-05	1.16675	0.25
ENSGALG00000004074	KCNS1	3.82378	0.00716339	2.814	0.25
ENSGALG00000028612		3.752	0.00416853	0.280242	0.05
ENSGALG00000020049	KCNK16	3.74014	0.00541492	1.50007	0.05
ENSGALG00000006513	F9	3.7226	0.00143658	0.701142	0.05
ENSGALG00000010436	DMBX1	3.71215	0.0142857	1.44697	0.1
ENSGALG00000005024	EFCC1	3.71	0.000994728	24.3271	0.95
ENSGALG00000003567	FNDC5	3.68957	0.000149009	54.8062	0.65
ENSGALG00000014657	ADGRV1	3.64391	0.002128	6.3928	0.8
ENSGALG00000026237		3.64192	3.58844e-09	19.7855	0.9
ENSGALG00000017194	TRPC6	3.64072	0.0253509	1.23733	0.2
ENSGALG00000028294	VWA5B2	3.63161	0.000215667	8.16889	0.65
ENSGALG00000004631	DRAXIN	3.62405	7.78128e-08	344.89	0.95
ENSGALG00000029015	TM6SF2	3.61217	0.00954203	1.85903	0.2
ENSGALG00000012932	FGD4	3.6066	0.00143651	30.2336	0.75
ENSGALG00000014280	AICDA	3.58597	0.00376203	1.3108	0.1
ENSGALG00000005733	WNT8b	3.55976	0.000271613	0.635821	0.1
ENSGALG00000017398		3.55903	0.0470457	4.54948	0.2
ENSGALG00000017056	DCLK1	3.55545	0.0114607	2.18133	0.45
ENSGALG00000016699	cOpn5L2	3.53982	0.00799924	1.13325	0.05
ENSGALG00000008918	LAMP5	3.5285	0.00171248	37.1398	0.55
ENSGALG00000001264	PLXNA2	3.52423	0.000302093	12.7997	0.95
ENSGALG00000012382		3.52139	0.00624529	0.318276	0.2
ENSGALG00000015847	PRSS35	3.51014	0.0119336	8.49509	0.6
ENSGALG00000014668	MCTP1	3.50889	0.015594	1.04298	0.1
ENSGALG00000001346		3.47804	0.00188665	5.34651	0.25
ENSGALG00000001768	TENM2	3.44095	0.000428569	7.16834	0.8
ENSGALG00000012142	KCNA4	3.43909	0.0204618	0.756315	0.05
ENSGALG00000025774		3.42362	0.00117007	12.8017	0.8
ENSGALG00000016310	FAM84B	3.40907	0.0143191	1.39638	0.3
ENSGALG00000023699		3.40231	0.00648214	1.58031	0.05
ENSGALG00000026769		3.39263	0.0141384	1.18969	0.3
ENSGALG00000015720	CHODL	3.39045	8.60214e-07	187.32	1
ENSGALG00000028459	FAM180A	3.38643	0.0142074	0.288993	0.05
ENSGALG00000008815	LRRN4	3.38474	0.000138559	50.4121	0.95
ENSGALG00000002314	CDHR1	3.37182	0.0179898	0.210368	0.15
ENSGALG00000016543	NHS	3.3709	0.033149	2.40259	0.5
ENSGALG00000000604	NKAIN1	3.34027	0.00900759	9.55754	0.45
ENSGALG00000009237		3.33429	0.045012	9.77584	0.35
ENSGALG00000006728	SLC5A1	3.32055	0.0421295	3.51095	0.3
ENSGALG00000009884	SYT14	3.28801	0.0329401	3.82364	0.4
ENSGALG00000014639	GLI1	3.28196	0.0134271	2.54859	0.45
ENSGALG00000009693	CPXM2	3.25924	0.0429397	0.374849	0.05
ENSGALG00000024294		3.23988	0.0371059	1.46688	0.15
ENSGALG00000016577	OTOF	3.22869	0.0482191	0.274385	0.05
ENSGALG00000001505	NGEF	3.20073	0.0213802	7.40351	0.5
ENSGALG00000025911	ARHGDIG	3.18772	0.015604	8.56611	0.55
ENSGALG00000027333	gga-mir-6713	3.17749	0.00154651	6.46262	0.45
ENSGALG00000011487	SHROOM3	3.16697	0.00548221	9.23058	0.95
ENSGALG00000020160	ADH6	3.15222	0.0432846	0.826206	0.25
ENSGALG00000005256	EPHA4	3.12667	1.25161e-06	108.92	0.95
ENSGALG00000003103	MST1R	3.12519	0.0439728	0.347995	0.05
ENSGALG00000017328	P2RY2	3.11805	0.0215468	6.38587	0.5
ENSGALG00000027060		3.09441	0.01014	1.39247	0.15
ENSGALG00000007320		3.0897	0.020384	1.72876	0.15
ENSGALG00000004170	ADA	3.07845	0.0239356	38.0979	0.9
ENSGALG00000017178	GRIA4	3.07431	0.0218657	0.263221	0.1
ENSGALG00000021126		3.04425	0.00728544	0.331824	0.05
ENSGALG00000003163	GNAO1	3.04229	0.000162419	50.9305	0.95
ENSGALG00000015290	LIX1	3.03641	0.0474342	13.2371	0.55
ENSGALG00000009239	TLR2-2	3.03099	0.0336528	1.86671	0.3
ENSGALG00000010312	PLCH1	3.01314	0.0230574	15.8133	0.85
ENSGALG00000005685	KSR1	3.00991	0.0232045	9.76817	0.6
ENSGALG00000003640	FAM20C	3.00438	0.0465145	8.59632	0.45
ENSGALG00000025235	gga-mir-1746	2.99178	0.023472	7.40855	0.25
ENSGALG00000005967		2.98654	0.00551377	40.5356	0.8
ENSGALG00000010803	LRRC72	2.97802	0.0107334	0.662595	0.1
ENSGALG00000005803	ZNRF3	2.97103	0.000138559	34.8526	1
ENSGALG00000023526		2.95739	0.00459369	0.101872	0.05
ENSGALG00000000680	NUAK2	2.9547	0.0242802	0.325011	0.3
ENSGALG00000016875	CLYBL	2.94536	0.0095775	26.1263	0.9
ENSGALG00000008418	GYLTL1B	2.92375	0.0115199	47.2124	0.95
ENSGALG00000015132	CDH2	2.8878	2.87966e-05	133.483	1
ENSGALG00000028841	CTSZ	2.87375	0.00590728	0.808561	0.1
ENSGALG00000014935	GREB1L	2.85275	0.000167077	36.2399	0.95
ENSGALG00000027302	TMEM52B	2.85045	0.00143651	0.113982	0.05
ENSGALG00000017261	TENM4	2.82204	8.49891e-05	17.2371	0.9
ENSGALG00000005149	FAM222A	2.81078	0.0270666	4.43853	0.65
ENSGALG00000020463		2.80935	0.00242727	2.99395	0.65
ENSGALG00000006609	EPHB1	2.80478	0.00548221	16.3167	0.7
ENSGALG00000014911	ARL15	2.78248	0.0112575	10.4309	0.5
ENSGALG00000012005	LRRC9	2.77499	0.0343971	0.14556	0.05
ENSGALG00000010781	GLRA3	2.74761	0.0294356	0.151207	0.1
ENSGALG00000008279	Lrrn1	2.71043	3.59586e-13	199.774	1
ENSGALG00000027925	HOXA3	2.6964	0.000176407	7.47015	0.65
ENSGALG00000011350	NEGR1	2.68117	0.0408272	39.8404	0.9
ENSGALG00000003767	NKD1	2.60497	0.000292587	72.3843	1
ENSGALG00000023142	EP3	2.58259	0.000514516	7.38588	1
ENSGALG00000017295	PTHrP	2.57207	0.0169339	40.3473	0.75
ENSGALG00000010971	CSRNP3	2.56755	0.000167444	58.8319	1
ENSGALG00000016709	RCAN2	2.53384	0.024893	37.0934	0.95
ENSGALG00000014419	SLIT2	2.51749	0.0125924	14.2296	0.55
ENSGALG00000014261	UCH-L1	2.50011	2.48813e-07	1034.62	1
ENSGALG00000019077		2.48802	0.0108713	21.8331	1
ENSGALG00000004994	ZNF703	2.47991	3.6888e-06	9.43835	1
ENSGALG00000029175	EFNB2	2.47773	0.01014	28.313	0.9
ENSGALG00000000583	SOX13	2.46988	0.0294371	3.58255	0.75
ENSGALG00000014866	FABP7	2.46777	3.59586e-13	2788.34	1
ENSGALG00000015673	ZFHX4	2.44685	0.0142097	12.345	0.95
ENSGALG00000013194	IRX1	2.43179	0.0466324	17.6137	0.9
ENSGALG00000001169	CRB2	2.39682	0.0179619	22.8404	0.9
ENSGALG00000016294	HMGCLL1	2.38952	0.0496125	46.6443	0.85
ENSGALG00000028110	CCDC124	2.38787	0.0118043	5.56985	0.9
ENSGALG00000010858	LRP2	2.35873	0.0368828	6.15401	0.95
ENSGALG00000011283	ZNF385D	2.35743	0.0466418	6.6296	0.65
ENSGALG00000004594	Ii	2.33883	0.0368828	13.9613	0.55
ENSGALG00000011511	CKB	2.32669	4.65835e-12	1422.23	1
ENSGALG00000010579	STON2	2.31131	0.0205732	25.531	0.95
ENSGALG00000003582	SLC1A3	2.30705	0.0284545	34.5688	0.9
ENSGALG00000000206	RASSF2	2.30667	0.0170223	42.3377	1
ENSGALG00000015152	BOC	2.2911	0.0483527	29.744	0.85
ENSGALG00000027400		2.27273	0.0464189	2.64428	0.2
ENSGALG00000027107	PROCA1	2.21254	0.00146039	80.7403	1
ENSGALG00000009078	GALNT14	2.21073	2.018e-05	0.608546	0.55
ENSGALG00000000644	NFASC	2.21033	0.027889	30.2081	1
ENSGALG00000005551	DKK3	2.19833	3.65683e-05	267.074	1
ENSGALG00000004623	AGTRAP	2.17913	0.0485817	60.0444	0.7
ENSGALG00000003160	CERS1	2.17783	0.00894365	72.6073	0.95
ENSGALG00000015696		2.16924	0.0340441	3.70036	0.65
ENSGALG00000006498	PTPRN2	2.15346	0.00538758	21.9137	1
ENSGALG00000007483	LRIG1	2.15272	0.0450257	27.452	0.9
ENSGALG00000004893	TMEM119	2.13731	0.0488373	24.0946	0.5
ENSGALG00000006221	KIF1A	2.12494	0.0107334	23.5056	1
ENSGALG00000027342	METRN	2.10072	0.0133615	0.489832	0.8
ENSGALG00000017239	CTSC	2.09262	1.21366e-09	244.775	1
ENSGALG00000011505	MARK3	2.06764	6.36291e-12	137.001	1

## Sheet: DEG_info_HH11_cluster2_dn.txt
ensid	Name	HH11 Cluster 2_v_other_DE.dn.HH11 Cluster 2_v_other.log2fc	HH11 Cluster 2_v_other_DE.dn.HH11 Cluster 2_v_other.padj	mean_rpkm	pct_above_0_rpkm
ENSGALG00000008635		-10.057	9.1586e-05	0.0598324	0.127273
ENSGALG00000006351	FAS	-8.97271	2.13619e-09	0.00401952	0.0181818
ENSGALG00000011581	KIF26A	-8.96966	1.83505e-07	0.00623009	0.109091
ENSGALG00000006208	OTOG	-8.66424	3.11156e-05	0.00342433	0.0727273
ENSGALG00000015347	ZPLD1	-8.60769	0.0047904	0.00624017	0.0363636
ENSGALG00000009507	PLEKHH1	-8.51366	1.14095e-07	0.00404251	0.0545455
ENSGALG00000015079	UPK1B	-8.23771	9.70198e-05	0.0230643	0.0545455
ENSGALG00000006343	ACTG2	-8.1711	1.31943e-10	0.7921	0.509091
ENSGALG00000028376	Fgf19	-8.15482	6.84132e-05	0.0130482	0.0727273
ENSGALG00000011274	DCN	-8.14687	1.03659e-06	0.0319921	0.0727273
ENSGALG00000006104	ADAMTSL3	-8.11825	0.00183714	0.00590078	0.0363636
ENSGALG00000027207		-8.10421	0.000104575	0	0
ENSGALG00000004044	CSRP3	-8.10239	0.000332596	0.00831474	0.0181818
ENSGALG00000012735	EDN1	-8.05759	9.70198e-05	0.0211119	0.0545455
ENSGALG00000006421	SLC16A12	-8.00489	0.000118518	0.00435033	0.0181818
ENSGALG00000004582	MYL2	-7.983	0.0115301	0.114219	0.0363636
ENSGALG00000015935	SMYD1	-7.96067	0.00525648	0.00435522	0.0181818
ENSGALG00000010868	MACC1	-7.92652	0.000472303	0	0
ENSGALG00000016415	MAP7D2	-7.8375	5.52566e-07	0	0
ENSGALG00000001857	FAM132A	-7.83474	0.000186369	0.00858355	0.0545455
ENSGALG00000017046	OSF-2	-7.82099	0.000832339	0.00140848	0.0181818
ENSGALG00000009867	WIF1	-7.73173	0.000134335	0.00792784	0.0363636
ENSGALG00000019470	MSC	-7.72587	9.66692e-06	0.0442767	0.145455
ENSGALG00000014872	FGF10	-7.7122	2.92315e-06	0.0256942	0.0363636
ENSGALG00000017034	FKHR	-7.63359	3.47575e-11	0.00813861	0.0363636
ENSGALG00000020899		-7.58828	6.04955e-06	0.0083595	0.0363636
ENSGALG00000017136	GJB6	-7.53507	9.70198e-05	0.0032028	0.0181818
ENSGALG00000016826	ADPRHL1	-7.50698	0.000971016	0.00658043	0.0181818
ENSGALG00000016635	MXRA5	-7.40829	5.97514e-06	0.0128241	0.0727273
ENSGALG00000000302	TNNT2	-7.31407	0.00434501	0.21323	0.0363636
ENSGALG00000010865	TMEM196	-7.31343	0.00123651	0	0
ENSGALG00000007831	TLX1	-7.30982	7.73203e-05	0.0564944	0.0363636
ENSGALG00000015379	TAGLN3	-7.29561	0.00755453	0.253177	0.181818
ENSGALG00000028153		-7.27706	0.000565491	0	0
ENSGALG00000014835	C7	-7.22462	0.00647242	0	0
ENSGALG00000020679	PLEKHS1	-7.21151	0.00557907	0.00944355	0.0363636
ENSGALG00000027785	CCBE1	-7.18556	0.000152776	0	0
ENSGALG00000009530	PDZRN4	-7.18424	4.89239e-05	0.00635241	0.0181818
ENSGALG00000005802	FLT4	-7.01983	0.000356068	0.0209073	0.0909091
ENSGALG00000014934	HS3ST1	-7.01561	0.000204012	0.0264433	0.0545455
ENSGALG00000007886	PAMR1	-7.01253	3.24257e-05	0.00849685	0.0363636
ENSGALG00000004376	IRK1	-6.99718	0.000249275	0.00207384	0.0181818
ENSGALG00000010461	EBF3	-6.99178	3.96048e-20	0.291781	0.236364
ENSGALG00000014984	F2RL1	-6.98312	0.000478229	0	0
ENSGALG00000011271	LUM	-6.97795	6.04955e-06	0.497132	0.236364
ENSGALG00000006877	KLHL4	-6.97401	0.0081149	0.00161642	0.0181818
ENSGALG00000007617	ANO1	-6.97247	0.000829625	0.00236261	0.0545455
ENSGALG00000006666	BPIFB7	-6.95634	0.00447839	0.0955712	0.0545455
ENSGALG00000004373	KCNJ16	-6.88353	0.000827604	0	0
ENSGALG00000001177	CD34	-6.8823	0.000215891	0.016782	0.0181818
ENSGALG00000007908	EFEMP1	-6.84714	0.000356068	0.0178246	0.0909091
ENSGALG00000016215	CXorf36	-6.80951	0.00429136	0	0
ENSGALG00000006087	GPC3	-6.80492	2.0271e-06	0.391927	0.163636
ENSGALG00000007706	FGF8	-6.78926	0.000356068	0.0304155	0.0545455
ENSGALG00000005348	RBBP8NL	-6.78154	0.000892943	0	0
ENSGALG00000012988	B4GALNT3	-6.77566	4.83735e-05	0.0100132	0.0545455
ENSGALG00000008908	NEUROD1	-6.76304	0.00891984	0.0325748	0.0181818
ENSGALG00000028759	LYPD6B	-6.72711	0.000472527	0.0216943	0.0909091
ENSGALG00000022994	SIX1	-6.68818	3.47575e-11	0.190322	0.2
ENSGALG00000008461	HGF/SF	-6.67171	0.000230581	0	0
ENSGALG00000016076	DPYS	-6.66779	0.00222164	0.0042025	0.0181818
ENSGALG00000010500	Nkx-6.2	-6.66044	0.00358726	0	0
ENSGALG00000012298	SLC39A8	-6.64978	0.000203964	0	0
ENSGALG00000009945	CPM	-6.6251	0.000465405	0.0231163	0.0181818
ENSGALG00000002371	RUSC2	-6.61188	0.00101339	0	0
ENSGALG00000012647	RFX4	-6.60318	0.000976025	0.00461409	0.0363636
ENSGALG00000015974	ADRA1D	-6.58165	0.0013428	0.000936372	0.0181818
ENSGALG00000002594	TFPI	-6.5644	5.63009e-05	0.32921	0.127273
ENSGALG00000028602		-6.56238	0.000832427	0.00230278	0.0181818
ENSGALG00000006519	DD1	-6.55756	0.000140632	0.00168544	0.0181818
ENSGALG00000005932	MYT1	-6.55483	0.00378466	0	0
ENSGALG00000015520	TRIM55	-6.55369	0.00982142	0.00397715	0.0181818
ENSGALG00000014988	POPDC2	-6.54994	0.00169272	0.00313339	0.0181818
ENSGALG00000012481	TNFIP6	-6.5428	0.00143551	0	0
ENSGALG00000012894	7	-6.53303	0.00224717	0.00418959	0.0181818
ENSGALG00000014908	FST	-6.52864	0.000270957	0.201956	0.218182
ENSGALG00000026345	GMIP	-6.50481	0.00119306	0.0018678	0.0363636
ENSGALG00000027420	POPDC3	-6.48344	0.0015404	0	0
ENSGALG00000005936	AGTR2	-6.45524	0.00114302	0	0
ENSGALG00000001946	RSPO1	-6.45021	0.00197167	0	0
ENSGALG00000006025	XIRP1	-6.44943	0.0147267	0.00065571	0.0181818
ENSGALG00000004267	SIGIRR	-6.43652	0.00197873	0	0
ENSGALG00000010825	AGR2	-6.423	0.0117747	0.019301	0.0181818
ENSGALG00000019261	ARHGAP8	-6.42181	0.00249024	0.00294385	0.0181818
ENSGALG00000016324	GSTA3	-6.40016	0.000320284	0	0
ENSGALG00000014976	GATA6	-6.38626	0.00555316	0.0136395	0.0181818
ENSGALG00000020791	CLCA2	-6.36039	0.00244657	0.0833645	0.109091
ENSGALG00000010983	NPY	-6.35173	0.00202025	0.0514911	0.0363636
ENSGALG00000007055		-6.34912	0.00379083	0.00423504	0.0181818
ENSGALG00000027633	RASSF9	-6.34033	0.00178277	0.00116652	0.0181818
ENSGALG00000012018	CGT	-6.32876	0.00460134	0.0121427	0.0363636
ENSGALG00000020180	ALB	-6.31836	0.000183191	0.00207191	0.0181818
ENSGALG00000026853	FGF3	-6.30694	0.00379944	0.0531298	0.109091
ENSGALG00000006775	TGM2	-6.30162	0.00198835	0.00229211	0.0181818
ENSGALG00000024000	7	-6.29089	0.00169677	0.0102387	0.0363636
ENSGALG00000018439	DLX1	-6.27668	1.03659e-06	0.538009	0.109091
ENSGALG00000012226	PPP1R17	-6.23675	8.59595e-07	0.488735	0.181818
ENSGALG00000024379		-6.23233	0.0198751	0.0125759	0.0181818
ENSGALG00000003512	SPINK7	-6.23093	2.43778e-05	0.543694	0.2
ENSGALG00000013869	IL20RA	-6.18779	0.00164336	0	0
ENSGALG00000002186	UNC45B	-6.17771	0.00549027	0	0
ENSGALG00000005519	TLL2	-6.1447	0.00206612	0.00151599	0.0181818
ENSGALG00000005672	SLC6A7	-6.14349	0.00232913	0	0
ENSGALG00000006879	LRRC56	-6.14316	0.00771669	0	0
ENSGALG00000016511	ADGRG2	-6.14169	0.00396547	0.00138222	0.0181818
ENSGALG00000015453	DUSP27	-6.12174	0.00455657	0.00352544	0.0363636
ENSGALG00000006729	CYP26A1	-6.10102	0.00609065	0.00202056	0.0181818
ENSGALG00000015307	ABI3BP	-6.10066	0.00621512	0	0
ENSGALG00000001021	MYOCD	-6.0977	0.0038696	0	0
ENSGALG00000011270	KERA	-6.09599	0.00358726	0	0
ENSGALG00000022935	FOXI3	-6.09286	0.000252752	0	0
ENSGALG00000025730	RIPPLY3	-6.08663	0.00600802	0.0169724	0.0545455
ENSGALG00000002098	GRIK3	-6.05861	0.0029195	0.0124637	0.0727273
ENSGALG00000003217	LITAF	-6.05128	0.00114492	0	0
ENSGALG00000013528		-6.04788	0.00191888	0	0
ENSGALG00000015433	ABCA1	-6.04159	0.00124956	0.00152269	0.0363636
ENSGALG00000002886	NKX2-5	-6.02755	0.00163801	0.142125	0.109091
ENSGALG00000006602	SYT8	-6.00928	0.00378466	0.00348705	0.0181818
ENSGALG00000015632	TRPA1	-6.00779	0.00307679	0	0
ENSGALG00000002420	EGFL7	-6.0015	6.51471e-08	0.382756	0.2
ENSGALG00000019436	MAL2	-5.99511	0.00183997	0.00503117	0.0363636
ENSGALG00000002845	CTNNA3	-5.98539	0.00141368	0.00981801	0.0545455
ENSGALG00000029024	TCF21	-5.98085	0.00127299	0	0
ENSGALG00000008440	CHST1	-5.97572	0.000391437	0.0307271	0.0909091
ENSGALG00000007508	HPSE2	-5.97561	0.000356068	0.017135	0.0363636
ENSGALG00000006811	ZIC1	-5.9571	0.00282978	0.010472	0.0545455
ENSGALG00000002907	MYL1	-5.95447	0.00499579	0	0
ENSGALG00000005985	GDF10	-5.94408	0.00980522	0.0050973	0.0181818
ENSGALG00000027720	OTX2	-5.94304	0.000827604	0	0
ENSGALG00000013980	SLC2A12	-5.93982	0.00103185	0.00363383	0.0181818
ENSGALG00000006344	GSTT1	-5.93777	0.000709294	0	0
ENSGALG00000026200	FAM134B	-5.92772	0.00175848	0.00233229	0.0363636
ENSGALG00000027494	SPTSSB	-5.91478	0.00239167	0	0
ENSGALG00000006720		-5.90248	0.00175848	0	0
ENSGALG00000011182	DLL1	-5.90081	0.00262057	0.0274295	0.0363636
ENSGALG00000007911	CHL1	-5.89109	0.00639415	0.00320465	0.0181818
ENSGALG00000016112	NOV	-5.87962	0.000851612	0	0
ENSGALG00000013079	ABCA13	-5.86312	0.00501405	0	0
ENSGALG00000003014	CHRNA3	-5.86245	0.00994454	0.043769	0.0181818
ENSGALG00000009414	FAM198B	-5.85638	0.00524409	0	0
ENSGALG00000026594	HS3ST5	-5.85589	0.00647242	0	0
ENSGALG00000001933	CORO2A	-5.84735	0.00200486	0	0
ENSGALG00000006576	GRM3	-5.83678	0.00887726	0.00162869	0.0181818
ENSGALG00000015396	CD200	-5.82207	0.0222492	0.026328	0.0181818
ENSGALG00000014208	GRHL2	-5.8151	0.0019551	0.0105956	0.0363636
ENSGALG00000015568	SH3TC1	-5.78845	0.0101028	0	0
ENSGALG00000009844	ACTC1	-5.78627	0.0444911	0.593185	0.109091
ENSGALG00000015531	PPP2R2C	-5.78199	0.0187491	0.0297252	0.0181818
ENSGALG00000006873	RASSF7	-5.77933	5.62139e-05	0.0138899	0.0363636
ENSGALG00000013747	TAGAP	-5.77876	0.00460134	0	0
ENSGALG00000027554	HLX	-5.77714	1.57581e-06	0.00449775	0.0181818
ENSGALG00000008018	SNAI1	-5.77634	1.45437e-12	1.46649	0.345455
ENSGALG00000027868	AMER2	-5.77622	0.000331074	0	0
ENSGALG00000016361	FAM110C	-5.76852	0.0018927	0	0
ENSGALG00000021024		-5.76531	0.00274405	0.0469116	0.145455
ENSGALG00000017052	CCNA1	-5.76362	0.0043242	0	0
ENSGALG00000001885		-5.7577	0.00577321	0.153611	0.0363636
ENSGALG00000024449	RAMP2	-5.7528	0.000290883	0	0
ENSGALG00000027067	C1QTNF6	-5.7528	0.00422519	0	0
ENSGALG00000004119		-5.73471	0.000832339	0.00425635	0.0181818
ENSGALG00000003005	CHRNB4	-5.72869	0.0178592	0.00170122	0.0181818
ENSGALG00000016558	FIGF	-5.71558	2.50496e-05	0.615967	0.181818
ENSGALG00000006472	KCNQ1	-5.69796	0.00274796	0.000956209	0.0181818
ENSGALG00000002888	CASZ1	-5.69708	0.00251591	0	0
ENSGALG00000028130	KIAA1644	-5.66937	0.0041594	0	0
ENSGALG00000004893	TMEM119	-5.66235	2.78011e-09	0.080235	0.0727273
ENSGALG00000001558	MOV10	-5.65936	0.00184245	0	0
ENSGALG00000023751	CYP26C1	-5.64794	2.10844e-05	0.441933	0.272727
ENSGALG00000016411	col14A1	-5.64625	0.00872139	0.0225768	0.0363636
ENSGALG00000004641	MYO5C	-5.64336	0.00729688	0.00304056	0.0363636
ENSGALG00000013742	EZR	-5.64231	7.176e-09	1.71861	0.618182
ENSGALG00000004502	KIF19	-5.61749	0.00779713	0	0
ENSGALG00000020316	IL13RA2	-5.617	0.00550462	0	0
ENSGALG00000007419	MASP1	-5.60881	0.00455657	0.00245962	0.0181818
ENSGALG00000015615	DOK7	-5.59361	0.00169677	0	0
ENSGALG00000024031	CYB561	-5.58289	0.00285599	0.00715908	0.0181818
ENSGALG00000008072	CHRDL1	-5.58146	0.00468658	0	0
ENSGALG00000017021	ATP7B	-5.57372	0.00594432	0	0
ENSGALG00000005319	CDH8	-5.56378	0.0075276	0	0
ENSGALG00000002182	NR5A2	-5.5591	0.00285599	0	0
ENSGALG00000027387	SPINK5	-5.55818	0.00431033	0	0
ENSGALG00000009042	ISM1	-5.55615	0.0162283	0.00207827	0.0181818
ENSGALG00000002203	FGF18	-5.5515	0.00509275	0.209978	0.0545455
ENSGALG00000005396	Wnt3a	-5.54937	0.00283224	0	0
ENSGALG00000025916	EMILIN3	-5.52441	0.00703578	0.00703147	0.0181818
ENSGALG00000013194	IRX1	-5.52434	4.85824e-06	0.0866293	0.127273
ENSGALG00000005812		-5.4965	0.00322123	0.00485274	0.0363636
ENSGALG00000008629		-5.4633	0.00720094	0	0
ENSGALG00000014235	WNT7B	-5.43529	0.0100537	0.000757994	0.0181818
ENSGALG00000009002	CPED1	-5.42962	3.18605e-05	0.214485	0.163636
ENSGALG00000002869	ENPP3	-5.42947	0.0229406	0.00409835	0.0181818
ENSGALG00000026687	PLCD4	-5.41	0.00598603	0.00199362	0.0181818
ENSGALG00000007193	HRASLS	-5.40331	0.00460134	0.00219987	0.0181818
ENSGALG00000005426	FREM1	-5.40023	0.000832427	0.03044	0.0545455
ENSGALG00000027677	DLX3	-5.39698	6.86348e-11	0.00904296	0.0363636
ENSGALG00000000547	CNKSR1	-5.39024	0.00504417	0	0
ENSGALG00000025982		-5.3815	0.00127299	0.00509368	0.0181818
ENSGALG00000003126	ERBB4	-5.37974	0.0192102	0.00277142	0.0181818
ENSGALG00000010005	EPAS1	-5.37846	0.00525648	0.00969095	0.0181818
ENSGALG00000010567	RAB3B	-5.37277	0.00546843	0.0331555	0.0181818
ENSGALG00000025748	Fgf9	-5.35933	0.00636807	0.00107361	0.0181818
ENSGALG00000007526		-5.33415	0.0306059	0.12023	0.0545455
ENSGALG00000016954	RGCC	-5.33168	5.92522e-07	0.397529	0.2
ENSGALG00000028721	LMOD1	-5.32789	0.00245081	0.00304	0.0181818
ENSGALG00000007356	MAP3K8	-5.32401	0.00390519	0	0
ENSGALG00000002667	OLFML2B	-5.30184	0.00337196	0.00923901	0.0181818
ENSGALG00000022940	FOXC2	-5.29905	1.19212e-06	0.024111	0.0363636
ENSGALG00000011911		-5.29641	0.000339109	0.202225	0.0545455
ENSGALG00000011227	CDS1	-5.29577	0.00576218	0.00288441	0.0363636
ENSGALG00000014042	SSPN	-5.28357	0.0048389	0	0
ENSGALG00000005467	HSD17B2	-5.27376	0.0142719	0.0118419	0.0181818
ENSGALG00000028136	CXCL12	-5.25189	3.23794e-09	0.104648	0.163636
ENSGALG00000006992	MMP9	-5.24908	0.0045637	0	0
ENSGALG00000016744	GABRA5	-5.24754	0.00525952	0	0
ENSGALG00000007129	ALDH6	-5.24717	0.0270261	0.0076654	0.0181818
ENSGALG00000009012	ZNF385B	-5.24333	0.0130197	0.0136722	0.0545455
ENSGALG00000016287	NR0B1	-5.23787	0.000665945	0	0
ENSGALG00000003333	GHDC	-5.22805	0.00112517	0	0
ENSGALG00000016035	GFRA4	-5.22117	0.00125608	0.00344708	0.0181818
ENSGALG00000000365	NKX2-6	-5.21789	0.0154268	0.282439	0.0545455
ENSGALG00000001854		-5.21609	0.00146397	0.228849	0.236364
ENSGALG00000003446	PRLR	-5.2091	0.00356632	0	0
ENSGALG00000010408	OPN4-1	-5.20661	0.0127395	0.00139789	0.0181818
ENSGALG00000000313	TNNI1	-5.19504	0.000245119	0.734261	0.163636
ENSGALG00000016920	LMO7	-5.19298	5.02827e-08	0.442157	0.236364
ENSGALG00000004754	OBSCN	-5.18173	0.0470025	0.00150791	0.0181818
ENSGALG00000026263	RGS8	-5.17586	0.0120389	0.00128697	0.0181818
ENSGALG00000018998	UNC5A	-5.17442	0.00352292	0	0
ENSGALG00000013727	SYNJ2	-5.16967	0.00754904	0.0255505	0.0363636
ENSGALG00000019221		-5.16425	0.012454	0	0
ENSGALG00000003488	PTPRT	-5.15902	0.00285726	0.00272837	0.0181818
ENSGALG00000005689	PAX2	-5.15436	6.11774e-05	0.0825047	0.127273
ENSGALG00000014516	CPEB2	-5.12908	0.0088601	0.00221418	0.0181818
ENSGALG00000015926	RUNX1T1	-5.12789	0.000644024	0.0356661	0.0727273
ENSGALG00000023195	DLX6	-5.12757	0.000957385	0.0559724	0.0545455
ENSGALG00000006755	USP2	-5.12478	0.000125474	0	0
ENSGALG00000014206	GABRA2	-5.12348	0.0068193	0.00809644	0.0363636
ENSGALG00000005257	VCAM1	-5.11951	0.0147408	0	0
ENSGALG00000012151	TBX20	-5.11743	0.00800931	0	0
ENSGALG00000012190	TMEM163	-5.10969	0.00779713	0	0
ENSGALG00000027514	SCEL	-5.10061	0.00880016	0	0
ENSGALG00000006112	SCN5A	-5.09908	0.00376119	0.00542939	0.0727273
ENSGALG00000005975	ZNF488	-5.09271	0.00722953	0	0
ENSGALG00000000957	ESAM	-5.08998	0.00313281	0	0
ENSGALG00000022702	CHRNA10	-5.08651	0.0123114	0	0
ENSGALG00000007543	Pgo2	-5.0853	0.00794699	0.013314	0.0181818
ENSGALG00000028047	RHOV	-5.07697	0.0163487	0.00563673	0.0363636
ENSGALG00000010250		-5.05766	0.00020279	1.30437	0.418182
ENSGALG00000012436	CARD10	-5.04954	0.0111942	0.00945008	0.0363636
ENSGALG00000009737	tac1	-5.04318	0.00906239	0	0
ENSGALG00000002263	KLHL6	-5.04273	0.0261405	0.00219327	0.0181818
ENSGALG00000003744	ADAM19	-5.03666	0.0397879	0.0194896	0.0181818
ENSGALG00000015862	CA2	-5.03498	0.00441066	0.748575	0.109091
ENSGALG00000015728	MUSK	-5.013	0.00739306	0.00309618	0.0181818
ENSGALG00000016867	ITGBL1	-5.01027	0.0243957	0.00523646	0.0363636
ENSGALG00000028806	GRB7	-5.00417	0.00662202	0	0
ENSGALG00000010009	TTC29	-4.99281	0.00220778	0	0
ENSGALG00000004596	AR	-4.99122	0.0113283	0.00121601	0.0181818
ENSGALG00000003028	ADAMTS13	-4.98476	0.00993945	0	0
ENSGALG00000026616	KRT78	-4.98018	0.00220778	0.932152	0.345455
ENSGALG00000026395	TRABD2A	-4.97028	0.00859409	0.00257063	0.0545455
ENSGALG00000028091	MYF5	-4.95301	1.57348e-05	0.0350683	0.309091
ENSGALG00000021714	PADI1	-4.95058	0.00771669	0	0
ENSGALG00000004917	DOC2B	-4.93692	0.000202524	0.0458597	0.0727273
ENSGALG00000010980	STK31	-4.93604	0.00672948	0	0
ENSGALG00000010343	TSPAN1	-4.93449	0.00823871	0	0
ENSGALG00000029169	HHEX	-4.92376	0.0334614	0.484601	0.109091
ENSGALG00000003588		-4.90528	4.85824e-06	0.00806284	0.0181818
ENSGALG00000028158	FGF7	-4.90436	0.0182149	0.00166419	0.0181818
ENSGALG00000022800	KCNB2	-4.90176	0.00502494	0	0
ENSGALG00000009853	FOXG1	-4.89601	0.00114288	0	0
ENSGALG00000022557	cldn3	-4.89119	0.000718965	0.0408944	0.0181818
ENSGALG00000004751		-4.88633	0.00366938	0	0
ENSGALG00000006627	UPB1	-4.88416	0.0213569	0.0113419	0.0181818
ENSGALG00000029170	NPBWR2	-4.87695	0.0279272	0.00629996	0.0181818
ENSGALG00000027217		-4.87553	0.00701083	0.397891	0.163636
ENSGALG00000015293	TMEM45A	-4.86923	0.00480822	0	0
ENSGALG00000016805	SULT1C	-4.85667	0.00993945	0	0
ENSGALG00000012802	F13A1	-4.84062	0.0101752	0	0
ENSGALG00000025744		-4.8318	0.00174303	0	0
ENSGALG00000027093	TLR1LB	-4.81805	0.00320284	0.021	0.0181818
ENSGALG00000010736	DIO1	-4.80923	0.00210996	0	0
ENSGALG00000005539	ITM2C	-4.80773	0.00164336	0	0
ENSGALG00000004274	cdermo-1	-4.8049	0.0018927	0	0
ENSGALG00000016108	SYBU	-4.794	0.0238155	0.0154568	0.0363636
ENSGALG00000000865	TRIM27	-4.79238	0.0108013	0	0
ENSGALG00000015846	SNAP91	-4.78903	0.0165633	0.00277886	0.0363636
ENSGALG00000014994		-4.78703	0.0107721	0	0
ENSGALG00000009215	PDE11A	-4.77905	0.00338601	0.00925345	0.0363636
ENSGALG00000025817	NHLH1	-4.77717	0.0180056	0.464485	0.290909
ENSGALG00000011244	DLK1	-4.77185	0.00906239	0	0
ENSGALG00000005441	NFIB	-4.76766	0.0111942	0.00154026	0.0181818
ENSGALG00000023904	FIBIN	-4.75967	0.000121663	0.449127	0.0545455
ENSGALG00000012092	ESYT3	-4.7584	0.0188152	0.211946	0.163636
ENSGALG00000021598		-4.75569	0.00176751	0.00499484	0.0181818
ENSGALG00000001869	LINGO2	-4.74636	0.0221538	0.0102769	0.0181818
ENSGALG00000008121	CYP17A1	-4.74347	0.00484819	0	0
ENSGALG00000006412	VGLL1	-4.74268	0.0245262	0.00887618	0.0181818
ENSGALG00000028183		-4.73266	0.0200172	0	0
ENSGALG00000025898	SMAD6	-4.73203	4.30143e-08	0.167557	0.254545
ENSGALG00000014150		-4.72762	0.00202144	0.0027242	0.0181818
ENSGALG00000005540	MICAL2	-4.7212	0.00525648	0.133215	0.0363636
ENSGALG00000027532	COLEC11	-4.72109	0.0385459	0.075167	0.0181818
ENSGALG00000005473	PNAT3	-4.71114	0.0258512	0.0152985	0.0363636
ENSGALG00000004510	ZNF536	-4.71001	0.00794699	0	0
ENSGALG00000010337	7	-4.70566	0.00982142	0	0
ENSGALG00000010769	HPGD	-4.70334	0.00890453	0	0
ENSGALG00000004103	FAM81A	-4.68823	0.00938217	0.00507731	0.0181818
ENSGALG00000026881	PITX2	-4.68495	0.0432785	0.240377	0.0363636
ENSGALG00000009499	NPY5R	-4.68325	0.0188174	0	0
ENSGALG00000007324	TP63	-4.68096	0.00708387	0	0
ENSGALG00000007809	TSHZ2	-4.67638	0.00996434	0	0
ENSGALG00000028635	AIF1L	-4.66549	1.61403e-05	0.923034	0.309091
ENSGALG00000009493	TMEM229B	-4.6581	6.24905e-05	0.122842	0.181818
ENSGALG00000015630	EDIL3	-4.65661	0.00552733	0.00711728	0.0181818
ENSGALG00000014182	7	-4.65507	0.00503126	0	0
ENSGALG00000023581		-4.64644	0.0055117	0	0
ENSGALG00000009424	foxp2	-4.63304	2.56479e-05	0.236405	0.218182
ENSGALG00000010320	PAWR	-4.62938	0.000763432	0.387361	0.0727273
ENSGALG00000010815	WDR17	-4.62152	0.0160905	0	0
ENSGALG00000012997	DNAH5	-4.61641	0.0248731	0.00333762	0.0181818
ENSGALG00000019233		-4.6148	0.00685176	0	0
ENSGALG00000001892	CYGB	-4.61265	0.000226385	0	0
ENSGALG00000002775	FA2H	-4.60316	0.00629533	0.23587	0.0727273
ENSGALG00000006804	ODF2L	-4.60132	0.0307902	0.128717	0.0545455
ENSGALG00000025821	CLDN16	-4.59435	0.0185422	0.00159669	0.0181818
ENSGALG00000011801	ESR2	-4.59174	0.0264495	0.00317382	0.0363636
ENSGALG00000007090	CPN1	-4.59115	0.00164336	0.294494	0.109091
ENSGALG00000003550	ARHGAP40	-4.57665	0.00156069	0.103193	0.0909091
ENSGALG00000010936	MYF6	-4.56892	0.0173762	0.0639344	0.0363636
ENSGALG00000001532	WNT2B	-4.5653	0.00873568	0	0
ENSGALG00000016309	KLHL31	-4.56478	0.0154439	0	0
ENSGALG00000001621	cldn5	-4.55611	0.00125849	0.00804181	0.0181818
ENSGALG00000010866	AREG	-4.54656	0.0120389	0	0
ENSGALG00000004414	LUZP2	-4.54618	0.00578462	0	0
ENSGALG00000029083	NXPH2	-4.5389	0.00923254	0	0
ENSGALG00000000806	LINGO3	-4.53784	0.00938217	0	0
ENSGALG00000002386	TMEM8B	-4.52355	0.00613478	0	0
ENSGALG00000026017	Drg11	-4.5211	0.0147124	0	0
ENSGALG00000000437		-4.51072	0.0162351	0	0
ENSGALG00000001214	PARD6A	-4.50736	0.000827604	0	0
ENSGALG00000003895	PRDM12	-4.50346	0.00902714	0.179141	0.145455
ENSGALG00000007530		-4.49426	0.0156113	0	0
ENSGALG00000006637		-4.49333	0.00811576	0	0
ENSGALG00000005210	WNK2	-4.48757	0.000854989	0.0591405	0.145455
ENSGALG00000000132	ARHGAP25	-4.47941	0.0199822	0	0
ENSGALG00000015001	LAMA4	-4.47464	0.00278784	0.184614	0.145455
ENSGALG00000021009	FOXL2	-4.4738	0.00703578	0.152926	0.0181818
ENSGALG00000001255	ARHGEF37	-4.46895	0.0275029	0.00119527	0.0181818
ENSGALG00000011664	RASSF6	-4.4661	0.0199545	0.199527	0.0363636
ENSGALG00000013634	LRRC2	-4.45325	0.00820698	0	0
ENSGALG00000014997	PLA1A	-4.45132	0.0320522	0.0105414	0.0181818
ENSGALG00000005504	HNF1B	-4.44768	0.0155026	0	0
ENSGALG00000020108		-4.44178	0.0240538	0.0190185	0.0181818
ENSGALG00000015517	KLHL32	-4.43827	0.000455465	0.0127963	0.145455
ENSGALG00000026004		-4.4318	0.000453248	0	0
ENSGALG00000000120	BMP-10	-4.4318	0.0232081	0	0
ENSGALG00000000678	CITED4	-4.43103	0.0126146	0.637926	0.163636
ENSGALG00000012457	SS3R	-4.41816	0.0160905	0	0
ENSGALG00000012886	MARVELD3	-4.41789	0.0110697	0	0
ENSGALG00000008449		-4.41459	0.0181986	0	0
ENSGALG00000007079	PAPPA	-4.39796	0.00674677	0	0
ENSGALG00000007998	SLC26A4	-4.39494	0.00891984	0	0
ENSGALG00000012317	ADGB	-4.39274	0.0455378	0.0189057	0.0363636
ENSGALG00000028857		-4.39066	0.000270362	0	0
ENSGALG00000009374	GPR160	-4.3766	0.0134368	0.00646492	0.0181818
ENSGALG00000013414	PDLIM3	-4.3717	0.0172058	0	0
ENSGALG00000010114	Pax-9	-4.37152	0.00460134	0.254339	0.109091
ENSGALG00000015721	SVEP1	-4.36788	0.0373273	0.033312	0.0181818
ENSGALG00000028236	PRRX2	-4.36234	2.77306e-06	0.240076	0.0909091
ENSGALG00000012998	WNT5B	-4.35831	0.000167405	0.889451	0.145455
ENSGALG00000027789	RAB37	-4.34844	0.014421	0.0113077	0.0181818
ENSGALG00000000818	LRRC32	-4.34167	0.0257429	0.143362	0.0181818
ENSGALG00000001486	ZAP70	-4.33895	0.0148675	0	0
ENSGALG00000001629		-4.32615	0.0254033	0.00270739	0.0181818
ENSGALG00000015080	SLC24A2	-4.32227	0.0194205	0	0
ENSGALG00000006000	ADAMTS2	-4.32208	0.0195947	0.000938578	0.0181818
ENSGALG00000020753		-4.30951	0.0111803	0.0173593	0.0363636
ENSGALG00000003313		-4.30393	0.00905623	0	0
ENSGALG00000010113		-4.30203	0.00762695	0.187128	0.0909091
ENSGALG00000018276	gga-mir-126	-4.30202	7.93942e-07	0.397082	0.0545455
ENSGALG00000013071	CALD1	-4.29849	1.69606e-10	1.66614	0.490909
ENSGALG00000020876	AOX2P	-4.29575	0.0313257	0.00506977	0.0181818
ENSGALG00000001300		-4.29319	0.0185448	0.00347345	0.0181818
ENSGALG00000003226	APOBEC2	-4.29316	0.0135553	0.00850445	0.0181818
ENSGALG00000006453	TF	-4.29096	0.00906239	0.632612	0.127273
ENSGALG00000003833	CACNA1E	-4.28847	0.00867509	0	0
ENSGALG00000004660	TRPV3	-4.28263	0.0419643	0.00492741	0.0181818
ENSGALG00000017279	KCNA5	-4.27583	0.0198603	0	0
ENSGALG00000005352	GATA5	-4.27102	0.0145735	0.967492	0.0909091
ENSGALG00000014987	OTOP1	-4.26827	0.0200981	0	0
ENSGALG00000022586	HPX	-4.26538	0.0120783	0	0
ENSGALG00000008997	STEAP4	-4.26226	0.0176324	0	0
ENSGALG00000011354	CRYBA2	-4.25651	0.00920152	0	0
ENSGALG00000028186	RERG	-4.2553	9.71267e-06	0.0547092	0.490909
ENSGALG00000011616	NPFFR2	-4.2511	0.0145735	0	0
ENSGALG00000006003		-4.24505	0.016503	0	0
ENSGALG00000004183	FAM20A	-4.23946	0.0488922	0.0272174	0.0181818
ENSGALG00000005349	MSLN	-4.22559	0.0128539	0	0
ENSGALG00000008969	EPCAM	-4.22073	6.10237e-06	11.6508	0.709091
ENSGALG00000017374	SLITRK3	-4.20945	0.000460828	0	0
ENSGALG00000025896		-4.199	0.0135015	0	0
ENSGALG00000011888	TGM4	-4.19582	0.0224727	0	0
ENSGALG00000006845	SYT17	-4.19232	0.00330772	0.22553	0.163636
ENSGALG00000023742		-4.19104	0.0198751	0	0
ENSGALG00000011166		-4.18181	0.0470855	0.00792303	0.0181818
ENSGALG00000027707	ESM1	-4.18004	0.0226327	0	0
ENSGALG00000019361	FAM19A2	-4.17938	0.00921876	0	0
ENSGALG00000005401	WNT9a	-4.17393	0.0123114	0	0
ENSGALG00000029064		-4.17187	0.0130822	0	0
ENSGALG00000027934	FAM19A1	-4.17096	0.015057	0	0
ENSGALG00000015528	JAKMIP1	-4.16801	0.0116597	0	0
ENSGALG00000015877	SH3BGRL2	-4.15924	0.000369771	0.0925311	0.0727273
ENSGALG00000011813	HEG1	-4.15608	0.0455739	0.0290867	0.0181818
ENSGALG00000013862	OLIG3	-4.15517	0.0153634	0	0
ENSGALG00000026578		-4.15451	0.0145298	0	0
ENSGALG00000004740	TMOD2	-4.14744	0.0101421	0.0357429	0.0545455
ENSGALG00000020982	BPIFB3	-4.14224	0.0213008	0	0
ENSGALG00000013781	MYH7	-4.13565	0.0227701	0.00283669	0.0181818
ENSGALG00000012178	PDGFB	-4.13181	0.0118808	0	0
ENSGALG00000003814	Dkk-1	-4.12374	0.00221707	1.04826	0.2
ENSGALG00000021589	RTN4RL1	-4.12323	0.0120389	0	0
ENSGALG00000027247	EOMES	-4.12307	0.0142719	0	0
ENSGALG00000009667	MFAP3L	-4.12138	0.0117167	0	0
ENSGALG00000006812	TTC36	-4.1189	0.00644094	0	0
ENSGALG00000004841	APLNR	-4.11759	0.00422519	0.469349	0.127273
ENSGALG00000007314	DSCAML1	-4.11467	0.0155225	0	0
ENSGALG00000014938	ABHD3	-4.11304	0.0192102	0	0
ENSGALG00000026243	POU4F3	-4.11279	0.00568692	0	0
ENSGALG00000004812	FAM129A	-4.11021	0.035489	0.182303	0.0545455
ENSGALG00000010071	MAB21L2	-4.10921	3.80723e-05	0.20382	0.127273
ENSGALG00000026787	HAND1	-4.09979	0.00700976	0.00965596	0.0181818
ENSGALG00000008135	SATB2	-4.09721	0.0327169	0.00312004	0.0181818
ENSGALG00000022819	PCP4	-4.0961	8.92667e-10	4.14884	0.345455
ENSGALG00000013741	SYTL3	-4.09564	0.0273113	0.00314556	0.0181818
ENSGALG00000015729	LPAR1	-4.09537	3.49861e-06	1.54514	0.309091
ENSGALG00000021375		-4.09295	0.0179633	0	0
ENSGALG00000016220	WISP1	-4.09196	0.0246459	0	0
ENSGALG00000017194	TRPC6	-4.09181	0.0154926	0	0
ENSGALG00000012045	SLC12A8	-4.09055	0.0303389	0.0133513	0.0181818
ENSGALG00000014913	ROS1	-4.08748	0.0243177	0	0
ENSGALG00000006776	KLHDC8B	-4.08572	0.00672948	0	0
ENSGALG00000002864	LRRTM3	-4.08491	0.0448662	0.0126008	0.0181818
ENSGALG00000004653		-4.08452	0.00770355	0.0151926	0.109091
ENSGALG00000012670	NRSN1	-4.08444	0.0202514	0.260768	0.0545455
ENSGALG00000025702	5S_rRNA	-4.07842	1.34337e-07	0.565121	0.0727273
ENSGALG00000012542	RASD2	-4.07423	0.0151202	0	0
ENSGALG00000011054	HOXA3	-4.06676	0.0151202	0.0369017	0.0363636
ENSGALG00000011082	KCNH7	-4.04732	0.0307902	0.00340625	0.0363636
ENSGALG00000004921	SLC6A1	-4.04547	0.0163663	0	0
ENSGALG00000020943	AGXT	-4.03907	0.0104175	0	0
ENSGALG00000005245	SGPP2	-4.03535	0.014377	0	0
ENSGALG00000028360	MGAT4C	-4.03525	0.0405615	0.00113635	0.0181818
ENSGALG00000012021		-4.03425	0.0403592	0.00822595	0.0181818
ENSGALG00000027305	SKAP1	-4.02623	0.0180532	0	0
ENSGALG00000011295	SOCS2	-4.02494	1.59056e-10	0.991371	0.181818
ENSGALG00000011658		-4.02437	0.00210714	0	0
ENSGALG00000014267	RBM47	-4.01981	0.0116993	0	0
ENSGALG00000021627	IFI27L2	-4.01713	0.000332602	1.05013	0.145455
ENSGALG00000010794	MEOX2	-4.01512	0.0150248	0	0
ENSGALG00000012971	CCDC170	-4.00771	0.0203771	0	0
ENSGALG00000013912		-4.00645	0.0147267	0	0
ENSGALG00000016426	MAP3K15	-4.00148	0.0235859	0	0
ENSGALG00000012593	SLC28A3	-3.99735	0.0227079	0	0
ENSGALG00000009512	TFPI2	-3.9929	0.0068193	0	0
ENSGALG00000026727	SLC30A10	-3.98862	0.018033	0	0
ENSGALG00000009382	CAPN8	-3.97945	0.0265945	0	0
ENSGALG00000028347	SDCBP2	-3.97875	0.0145735	0	0
ENSGALG00000003545	C9orf171	-3.97796	0.0126173	0	0
ENSGALG00000002191	TLX2	-3.97779	0.0265945	0.0114807	0.0181818
ENSGALG00000020423		-3.97637	0.0197367	0	0
ENSGALG00000012541	MB	-3.97273	0.0104118	0	0
ENSGALG00000028222		-3.97243	0.0194226	0	0
ENSGALG00000008893	SYT4	-3.97171	0.0234344	0	0
ENSGALG00000007361	SS	-3.96953	0.0183083	0	0
ENSGALG00000022250		-3.96874	0.00644094	0	0
ENSGALG00000011344	TTLL2	-3.96719	0.0213008	0	0
ENSGALG00000006234	CBFA2T3	-3.96326	0.000799855	0.033033	0.109091
ENSGALG00000013051	SEMA5A	-3.96297	0.0209668	0.236515	0.0909091
ENSGALG00000008947	PAK7	-3.95589	0.0401591	0.0296602	0.0545455
ENSGALG00000013838		-3.95568	0.0421731	0.0047322	0.0181818
ENSGALG00000021183	C15orf26	-3.95231	0.012717	0	0
ENSGALG00000006469	ATP12A	-3.95099	0.0210048	0	0
ENSGALG00000008840	ACSL5	-3.94619	0.0188644	0	0
ENSGALG00000005024	EFCC1	-3.93918	0.0130069	0.203608	0.127273
ENSGALG00000015968	ESRP1	-3.92275	0.0407628	0.148405	0.0909091
ENSGALG00000008340	FES	-3.91692	0.0236203	0	0
ENSGALG00000001161	FLI1	-3.91686	0.000231437	1.85974	0.218182
ENSGALG00000022788	NIPAL2	-3.91413	0.0142758	0	0
ENSGALG00000026609		-3.91331	0.0147267	0	0
ENSGALG00000010369	IGSF10	-3.90899	0.00324339	0.0104892	0.163636
ENSGALG00000026351		-3.90537	1.12662e-14	0.655288	0.454545
ENSGALG00000006591	TNNI2	-3.90397	0.0185474	0	0
ENSGALG00000022137	CRP	-3.90394	0.0054188	0.0100502	0.0181818
ENSGALG00000005492	NBEAL2	-3.90282	0.0204822	0.0228886	0.0909091
ENSGALG00000010200	TRHDE	-3.90038	0.0127319	0	0
ENSGALG00000021180		-3.89516	0.00207405	0	0
ENSGALG00000025216	gga-mir-1645	-3.89271	2.31908e-05	0.157201	0.0181818
ENSGALG00000000779	MYH13	-3.89203	0.0195947	0	0
ENSGALG00000023577	TBX2	-3.89167	0.000566883	0	0
ENSGALG00000013060	ADCY2	-3.89124	0.0215063	0.231684	0.0909091
ENSGALG00000005852	SRMS	-3.8892	0.0265235	0.00236445	0.0181818
ENSGALG00000017244	PRSS23	-3.88903	0.0305724	0.196585	0.0181818
ENSGALG00000006076	RASGEF1C	-3.88885	0.0180123	0	0
ENSGALG00000016470	KCNS3	-3.88757	0.0383504	0.299786	0.0545455
ENSGALG00000010881	ASB2	-3.88677	0.0253396	0	0
ENSGALG00000010540	TTC39A	-3.88521	0.0308424	0.421085	0.145455
ENSGALG00000028483	NKX2-8	-3.8842	0.0217057	0	0
ENSGALG00000006389		-3.88046	0.00253426	0	0
ENSGALG00000000692	CDK18	-3.87607	0.0184387	0.0566972	0.0545455
ENSGALG00000012422		-3.87496	0.023499	0	0
ENSGALG00000027786	SOCS3	-3.87063	0.00921876	0	0
ENSGALG00000008702	OVOL2	-3.8595	0.0129434	0.0135859	0.0181818
ENSGALG00000010535	SGMS2	-3.85728	0.0109852	0.367715	0.0727273
ENSGALG00000000893	TAT	-3.85016	0.0209269	0	0
ENSGALG00000001828	SH2B2	-3.84286	0.0270261	0.0107824	0.0181818
ENSGALG00000017485	TLR1LA	-3.83674	0.0150726	0	0
ENSGALG00000010583	VIT	-3.83653	0.0170038	0	0
ENSGALG00000016833	F7	-3.82493	0.0209632	0	0
ENSGALG00000004398	CARD11	-3.82457	0.0189629	0	0
ENSGALG00000015865	FAM46A	-3.81924	0.000227048	0.239847	0.218182
ENSGALG00000023269		-3.81281	0.00964647	0	0
ENSGALG00000009719	PCDH10	-3.80513	0.0169816	0	0
ENSGALG00000023296	SCL	-3.8017	0.0231482	0	0
ENSGALG00000004945	SLC12A1	-3.80021	0.0474228	0.00983167	0.0181818
ENSGALG00000026584		-3.78787	0.0315049	0	0
ENSGALG00000027694		-3.78617	0.00769511	0.249903	0.0545455
ENSGALG00000021273	TMPRSS13	-3.78449	0.0147579	0	0
ENSGALG00000028928	LCAT	-3.78057	0.0215846	0	0
ENSGALG00000007174	ChTL1A	-3.78012	0.0278951	0.211444	0.109091
ENSGALG00000005964		-3.77259	0.00741561	0	0
ENSGALG00000005043	ACACB	-3.7687	0.0218699	0	0
ENSGALG00000003603		-3.76488	0.0234889	0	0
ENSGALG00000000309	LAD1	-3.76198	0.01351	0	0
ENSGALG00000023709		-3.75141	0.0196927	0.00478841	0.0181818
ENSGALG00000014961	FAM26E	-3.75047	0.0136804	0	0
ENSGALG00000014074	CPEB4	-3.74662	0.0311139	0.0162457	0.0363636
ENSGALG00000014884	ISL1	-3.74551	0.00262057	1.83052	0.309091
ENSGALG00000027094	OR11A1	-3.74321	0.0460317	0.00601144	0.0181818
ENSGALG00000003285	CDHR2	-3.73833	0.0301741	0	0
ENSGALG00000025914		-3.73079	0.023215	0	0
ENSGALG00000012097	AOAH	-3.727	0.0301979	0	0
ENSGALG00000009041		-3.72686	0.0244478	0	0
ENSGALG00000010806	RIN3	-3.71445	0.018033	0	0
ENSGALG00000016933	DACH1	-3.70612	0.00298995	0.190125	0.0909091
ENSGALG00000009437	MECOM	-3.69584	5.99734e-10	0.306173	0.927273
ENSGALG00000004102	C21H1orf158	-3.68546	0.00805386	0	0
ENSGALG00000002355	RBPMS2	-3.68354	0.000579772	0.997613	0.236364
ENSGALG00000016138	DSCAM	-3.67659	0.0248478	0	0
ENSGALG00000004078		-3.67269	0.0231091	0	0
ENSGALG00000006584		-3.66837	0.00639415	0	0
ENSGALG00000008830	BMP2	-3.65964	0.0213008	0.428695	0.127273
ENSGALG00000011838	GUCY2C	-3.65611	0.0290306	0	0
ENSGALG00000019157	SMPX	-3.65508	0.0308424	0	0
ENSGALG00000003580	MMP2	-3.65447	6.3879e-08	2.90774	0.636364
ENSGALG00000008961	PTPRZ1	-3.65189	0.00215462	0.767518	0.418182
ENSGALG00000000017		-3.65072	0.000196415	0	0
ENSGALG00000005981	GDF2	-3.64871	0.0250561	0	0
ENSGALG00000007566		-3.64661	0.0176539	0	0
ENSGALG00000007257	TEKT5	-3.64324	0.0277566	0	0
ENSGALG00000008918	LAMP5	-3.64293	0.0160905	0.402994	0.0545455
ENSGALG00000017238	GRM5	-3.64222	0.0479829	0.0014318	0.0181818
ENSGALG00000008040		-3.63931	0.0200272	0	0
ENSGALG00000007837	KAZALD1	-3.63224	3.07786e-05	1.8581	0.527273
ENSGALG00000013900	MAP7	-3.62644	0.0352865	0.266604	0.0909091
ENSGALG00000021057	KCNE4	-3.62321	0.0107405	0	0
ENSGALG00000008856		-3.62039	0.000183958	0.270102	0.290909
ENSGALG00000026790	DMRT2	-3.61065	0.0234771	0	0
ENSGALG00000016400	RSAD2	-3.60991	0.0301316	0	0
ENSGALG00000005207	SYNPO2L	-3.60324	0.0223569	0	0
ENSGALG00000029012		-3.60054	0.0452641	0.0939358	0.0181818
ENSGALG00000016603	MID1	-3.59883	4.43726e-05	1.96957	0.272727
ENSGALG00000002991	ARID5B	-3.5976	0.0045637	0.341855	0.109091
ENSGALG00000023485		-3.59649	0.0063662	0	0
ENSGALG00000000115	HEP21	-3.58636	0.0306451	0	0
ENSGALG00000009388	SUSD4	-3.58618	0.0439497	0.00311946	0.0181818
ENSGALG00000011994	SYNPO2	-3.5745	0.0208943	0	0
ENSGALG00000016020	CLIC6	-3.57189	0.0124831	0	0
ENSGALG00000014973	GPR156	-3.56894	0.0230139	0	0
ENSGALG00000000117	TRIM27.1	-3.56716	0.0129434	0	0
ENSGALG00000007980	KCNG1	-3.56625	0.0220757	0.420428	0.0727273
ENSGALG00000026276	TCF15	-3.56476	0.00120767	0.0412444	0.0727273
ENSGALG00000028892		-3.56354	0.000884495	0	0
ENSGALG00000015198		-3.56277	0.0183278	0	0
ENSGALG00000023909		-3.56229	0.0158785	0	0
ENSGALG00000007357	BCL6	-3.5618	0.022997	0.203381	0.0727273
ENSGALG00000004436		-3.55374	0.0306861	0	0
ENSGALG00000007515	SFRP5	-3.53135	0.0208943	0	0
ENSGALG00000008498	Diet1	-3.52481	0.0341206	0	0
ENSGALG00000017089	SLC46A3	-3.52346	0.0231704	0.00430706	0.0545455
ENSGALG00000004569	UNC5B	-3.52059	2.56752e-05	1.67632	0.309091
ENSGALG00000001071	ELN	-3.52009	0.00245081	0	0
ENSGALG00000005347	ADAMTS18	-3.51302	0.0231894	0.219371	0.145455
ENSGALG00000002290		-3.51199	0.0217548	0	0
ENSGALG00000005297	HHATL	-3.50684	0.0232081	0	0
ENSGALG00000016473	OSR1	-3.50293	0.00989199	0	0
ENSGALG00000025954	RAX1	-3.50032	0.0188617	0	0
ENSGALG00000029106	LGI1	-3.49214	0.0422322	0.0819435	0.0545455
ENSGALG00000026821	RUNX3	-3.48778	0.0180105	0	0
ENSGALG00000011314	LRRC3B	-3.48755	0.0197892	0	0
ENSGALG00000028008		-3.48661	1.14095e-07	14.7889	0.345455
ENSGALG00000013722	SEMA3B	-3.48658	0.00595972	0.0294306	0.0909091
ENSGALG00000001560	KCNU1	-3.48305	0.0301316	0	0
ENSGALG00000027669	NOL4	-3.47813	0.0276238	0	0
ENSGALG00000004501		-3.47338	0.0421014	0.0037043	0.0181818
ENSGALG00000001535		-3.45275	0.0185474	0.00404296	0.0545455
ENSGALG00000004729	SLC7A10	-3.45215	0.0202514	0	0
ENSGALG00000004827		-3.44991	0.0316013	0	0
ENSGALG00000006346	JSC	-3.44451	3.40322e-06	15.0526	0.781818
ENSGALG00000024171	HRH2	-3.44181	0.0215063	0	0
ENSGALG00000002729	GK5	-3.44143	0.0254033	0.582561	0.127273
ENSGALG00000013057		-3.43333	0.00156069	0.378625	0.381818
ENSGALG00000006106		-3.43257	0.0292282	0	0
ENSGALG00000015679	SAMSN1	-3.42487	0.0281386	0	0
ENSGALG00000014407	CASR	-3.41906	0.0394481	0	0
ENSGALG00000010299	RSPH9	-3.41905	0.0437718	0.660457	0.181818
ENSGALG00000012053	FAM83F	-3.41806	0.0247687	0	0
ENSGALG00000017205	ENDOD1	-3.4119	0.0238155	0	0
ENSGALG00000011124	ARHGAP24	-3.41004	0.0194973	0.524356	0.181818
ENSGALG00000026163	TNFSF11	-3.40789	0.0311139	0	0
ENSGALG00000011582	SLC17A8	-3.40474	0.0411074	0	0
ENSGALG00000026718	HIC1	-3.39568	0.0238418	0.00215765	0.0181818
ENSGALG00000010161	DMRT3	-3.38244	0.0350226	0	0
ENSGALG00000007690	TFAP2C	-3.38135	0.0145298	0.84274	0.145455
ENSGALG00000011809	GRIN2B	-3.38125	0.0298545	0	0
ENSGALG00000013094	DDC	-3.37836	0.0345184	0	0
ENSGALG00000005122	MYO1H	-3.37117	0.0385571	0	0
ENSGALG00000011306	DES	-3.36991	1.7152e-06	1.70864	0.581818
ENSGALG00000010762	OPN3	-3.36548	0.0169149	0	0
ENSGALG00000025885	COR7A	-3.36281	0.023215	0	0
ENSGALG00000017173	GUCY1A2	-3.35963	0.00501405	0.640072	0.127273
ENSGALG00000020873		-3.34913	0.0219206	0	0
ENSGALG00000007685	BCL9L	-3.34858	0.00720094	0.00481072	0.0181818
ENSGALG00000028946	CSRP2	-3.34682	5.42349e-06	2.89649	0.563636
ENSGALG00000016721	PLCXD1	-3.34654	0.032852	0	0
ENSGALG00000027176		-3.34395	0.0271302	0	0
ENSGALG00000016095	Emx1	-3.3426	0.00983452	0	0
ENSGALG00000008455	SEMA3C	-3.3407	0.0470025	0.795186	0.181818
ENSGALG00000026094	PCDHA11	-3.3404	0.0243957	0.0141479	0.0363636
ENSGALG00000026138		-3.33219	0.00159029	0.509027	0.0727273
ENSGALG00000011973	SUSD5	-3.32723	0.0243957	0	0
ENSGALG00000021399		-3.32604	0.0389253	0	0
ENSGALG00000016602	ARHGAP6	-3.32361	0.0111359	0.146006	0.127273
ENSGALG00000003551	PRELP	-3.31913	0.000569879	0.0758934	0.109091
ENSGALG00000028564	GRP	-3.31832	0.0259024	0	0
ENSGALG00000025919	BAMBI	-3.30528	1.32265e-05	3.56877	0.545455
ENSGALG00000000098	ANTXR1	-3.30281	0.0259024	0	0
ENSGALG00000028402		-3.30249	0.0430187	0	0
ENSGALG00000012023	DACT1	-3.30203	0.0128117	0.78356	0.163636
ENSGALG00000026370		-3.30096	0.0310791	0	0
ENSGALG00000028140	CNTFR	-3.29715	0.000403329	0.967716	0.181818
ENSGALG00000009969		-3.29701	0.0250961	0.00948727	0.0181818
ENSGALG00000005258	SS5R	-3.29568	0.0372649	0	0
ENSGALG00000026919		-3.29427	0.0307373	0.307559	0.0727273
ENSGALG00000027980	NANOS1	-3.29066	0.0261405	0.383614	0.0909091
ENSGALG00000004426	TNFRSF8	-3.28764	0.0405615	0	0
ENSGALG00000026928	KLF4	-3.28607	0.00689992	0	0
ENSGALG00000024483	HSBP1L1	-3.28177	0.0460961	0.184753	0.0181818
ENSGALG00000023354	FSCN2	-3.27624	0.032783	0.00406171	0.0181818
ENSGALG00000015466	SIM1	-3.27427	0.0301316	0	0
ENSGALG00000011269	EPYC	-3.27025	0.0264227	0	0
ENSGALG00000025937	FXYD6	-3.26902	0.00250984	1.26425	0.272727
ENSGALG00000027511	SP5	-3.26837	0.00633432	0.0889305	0.0545455
ENSGALG00000006810		-3.26237	0.0088412	0	0
ENSGALG00000022720		-3.26146	0.00176799	0	0
ENSGALG00000029174	AES	-3.26042	0.00169272	0.0768561	0.109091
ENSGALG00000028582	LMO2	-3.2559	0.00648019	0.945257	0.272727
ENSGALG00000023738	IRX6	-3.25352	0.00010841	0.0458771	0.0727273
ENSGALG00000012216	BMPR1B	-3.24742	2.33841e-05	1.44472	0.218182
ENSGALG00000025887	ATF3	-3.24523	0.00158345	1.21746	0.2
ENSGALG00000003324	PRRX1	-3.24113	2.19804e-05	1.13806	0.272727
ENSGALG00000002390	CA6	-3.23738	0.0400449	0	0
ENSGALG00000009048	ABLIM1	-3.23292	0.0444647	0.706151	0.145455
ENSGALG00000005725	CSF1R	-3.23159	0.0355318	0	0
ENSGALG00000002183	PRR16	-3.22479	0.0103675	0	0
ENSGALG00000028685		-3.22368	0.0165523	0.276568	0.0363636
ENSGALG00000007001	TLR4	-3.22225	0.0454092	0	0
ENSGALG00000004521	GPX3	-3.21318	1.52875e-07	2.42389	0.581818
ENSGALG00000020723	NOG2	-3.20638	0.00538254	0	0
ENSGALG00000028939	AOC1	-3.20381	0.0267214	0	0
ENSGALG00000012456	RAC2	-3.19929	0.0466781	0	0
ENSGALG00000015558	CPA6	-3.19909	0.0306557	0	0
ENSGALG00000003553	ABCA12	-3.1914	0.0400834	0	0
ENSGALG00000023279	EPN3	-3.19068	0.0221439	0	0
ENSGALG00000029136		-3.19031	0.0264495	0	0
ENSGALG00000009724	GREM1	-3.1893	0.0282154	0	0
ENSGALG00000006809	chOBF-1	-3.18179	0.0350226	0	0
ENSGALG00000005223	ADCYAP1R1	-3.17963	0.0427756	0.487396	0.109091
ENSGALG00000015905		-3.17146	0.0203647	0	0
ENSGALG00000004790	WNT4	-3.17125	0.00332502	0.347751	0.454545
ENSGALG00000024396	NEUROD4	-3.16906	0.0231704	0	0
ENSGALG00000001544	ADAMTS10	-3.16443	0.0199737	0.0226439	0.0909091
ENSGALG00000005462	ZP4	-3.15763	0.0292282	0	0
ENSGALG00000023393		-3.14769	0.0371587	0.106915	0.0363636
ENSGALG00000007367	WFIKKN2	-3.14766	0.0437732	0	0
ENSGALG00000017242	7	-3.14488	0.000370118	0.496024	0.290909
ENSGALG00000012285	BAIAP2L2	-3.14008	0.0440769	0	0
ENSGALG00000023094		-3.13144	0.0153471	0	0
ENSGALG00000028196		-3.13038	0.0024807	0	0
ENSGALG00000007043		-3.12808	0.0413039	0	0
ENSGALG00000006832	WFDC2	-3.12248	0.0110186	0.135468	0.127273
ENSGALG00000013603	MYCT1	-3.1218	0.0429412	0	0
ENSGALG00000015358	myosin	-3.11763	0.0307902	1.67867	0.618182
ENSGALG00000019710		-3.11736	0.0258795	0.184231	0.0909091
ENSGALG00000011127		-3.11724	0.0215846	0	0
ENSGALG00000006044	C2orf54	-3.11694	0.0234892	0	0
ENSGALG00000004930	HRH1	-3.11112	0.0460961	0	0
ENSGALG00000009604	DBX2	-3.1041	0.000126729	0.68971	0.236364
ENSGALG00000026869		-3.10107	0.0149865	0	0
ENSGALG00000004087	THSD4	-3.10071	0.00529779	0.46564	0.145455
ENSGALG00000003050		-3.09044	0.0329299	0	0
ENSGALG00000001373	TRAF3IP3	-3.08955	0.0426427	0	0
ENSGALG00000026560	PRDM8	-3.08847	0.0163487	0	0
ENSGALG00000015382	CHRNA6	-3.08197	0.0412845	0	0
ENSGALG00000001661	SLC22A7	-3.07506	0.0315452	0	0
ENSGALG00000026484	RUNX2	-3.07286	0.0262957	0.0629968	0.0909091
ENSGALG00000002452	AQP3	-3.06547	0.0498612	0	0
ENSGALG00000005389		-3.06545	0.0194859	0	0
ENSGALG00000005131	BARX1	-3.06051	0.0117747	0.0396911	0.0181818
ENSGALG00000005883	BRICD5	-3.05741	0.0341206	0	0
ENSGALG00000016169	TMPRSS3	-3.05397	0.045632	0	0
ENSGALG00000007003		-3.04507	0.0478561	0	0
ENSGALG00000028713		-3.04443	0.00262057	0.0382573	0.0727273
ENSGALG00000000774	TLR21	-3.04394	0.0413039	0	0
ENSGALG00000012662	NUAK1	-3.0395	0.00123651	3.15717	0.490909
ENSGALG00000002466	SLC2A5	-3.03223	0.043016	0	0
ENSGALG00000015559	ABLIM2	-3.02585	0.0352654	0.0190461	0.145455
ENSGALG00000008308	BHLHE40	-3.02542	0.0120734	0.033738	0.0181818
ENSGALG00000028060		-3.02367	0.0224321	0	0
ENSGALG00000003590	C17orf58	-3.01464	0.0316013	0	0
ENSGALG00000008814	ASB15	-3.0092	0.0486179	0	0
ENSGALG00000026957	SEMA4G	-3.0023	0.047783	0.426549	0.163636
ENSGALG00000023146	CBX7	-2.99053	0.0201146	0	0
ENSGALG00000010473	PDZK1IP1	-2.99018	0.0297922	0	0
ENSGALG00000011893	SLC38A6	-2.98797	0.000143992	2.07367	0.563636
ENSGALG00000012520	NCF4	-2.98412	0.0412845	0	0
ENSGALG00000006575	VPAC2	-2.98176	0.0430733	0	0
ENSGALG00000009355	CLDN11	-2.97493	0.0400449	0.419194	0.109091
ENSGALG00000015623	HGFAC	-2.97009	0.0448956	0	0
ENSGALG00000023414	HMX2	-2.96605	0.0264364	0	0
ENSGALG00000013663	FGF20	-2.9642	0.0415654	0	0
ENSGALG00000000722		-2.96404	0.0429412	0	0
ENSGALG00000012913	PKP2	-2.96195	0.040195	0.797186	0.236364
ENSGALG00000010323	BATF	-2.95839	0.022907	0	0
ENSGALG00000007140	NRP1	-2.95691	0.00658489	1.05927	0.236364
ENSGALG00000003965	DBX1	-2.95245	0.0449545	0	0
ENSGALG00000014999	MAP1B	-2.94606	0.000976025	1.92961	0.527273
ENSGALG00000008602	SLC39A12	-2.9429	0.0469707	0	0
ENSGALG00000001932	SRRM3	-2.94167	0.0382397	0	0
ENSGALG00000017690	KCNS2	-2.93511	0.03633	0	0
ENSGALG00000004778	SLC47A2	-2.93278	0.0478826	0	0
ENSGALG00000004829	ATP2B2	-2.92382	0.0382397	0.178226	0.218182
ENSGALG00000014815	EMILIN2	-2.91404	0.0232081	0.650374	0.145455
ENSGALG00000008780	CTBS	-2.90741	0.0253396	1.15292	0.109091
ENSGALG00000022976	OFCC1	-2.89322	0.0399335	0	0
ENSGALG00000016662	GATA4	-2.8911	0.0437902	0	0
ENSGALG00000010738	TC2N	-2.88801	6.14866e-07	0.24807	0.818182
ENSGALG00000000775	CTSS	-2.88291	0.0417957	0	0
ENSGALG00000021800	gga-mir-454	-2.88111	0.0176571	0.0485092	0.0181818
ENSGALG00000000917	NRG2	-2.87741	0.0470686	0	0
ENSGALG00000003176		-2.87091	0.0452447	0.00450371	0.0181818
ENSGALG00000015908	COL12A1	-2.86662	0.0114438	0.483487	0.2
ENSGALG00000008570	MOV10L1	-2.86612	0.0394647	0	0
ENSGALG00000009612	TGFB2	-2.86337	0.031554	0.703615	0.2
ENSGALG00000026033	SYT2	-2.86216	0.0401031	0	0
ENSGALG00000016945	LECT1	-2.85482	2.50496e-05	2.88015	0.490909
ENSGALG00000007806	FGF16	-2.8528	0.0478826	0	0
ENSGALG00000028778		-2.85182	0.0371126	0	0
ENSGALG00000009075	CD99L2	-2.84829	0.00325327	1.3316	0.181818
ENSGALG00000000974	IGSF1	-2.84335	0.0480304	0.00261748	0.0181818
ENSGALG00000028915		-2.84315	0.0364871	0	0
ENSGALG00000023460		-2.83496	0.0247988	0	0
ENSGALG00000028349		-2.83333	0.0257462	0	0
ENSGALG00000015395		-2.83122	0.0443721	0	0
ENSGALG00000004196		-2.82824	0.00982142	0.00312802	0.0363636
ENSGALG00000008747	ITGA8	-2.82363	0.0247687	0.791165	0.254545
ENSGALG00000002974	SPHKAP	-2.82152	0.0430467	0	0
ENSGALG00000004593	SULF2	-2.81753	0.00795639	2.31119	0.454545
ENSGALG00000011680	EPHA5	-2.8169	0.0222038	0.915583	0.2
ENSGALG00000001626	UTS2R	-2.81154	0.0467961	0	0
ENSGALG00000015348	ALCAM	-2.80812	0.000827604	4.58005	0.709091
ENSGALG00000006320		-2.80392	0.0486789	0	0
ENSGALG00000009155	CHGB	-2.80377	0.0068193	1.97547	0.327273
ENSGALG00000014857	SEPP1	-2.80072	0.0107535	1.94415	0.127273
ENSGALG00000027300	Id3	-2.79712	4.92835e-14	0.75957	0.327273
ENSGALG00000002555	RET	-2.79033	0.0174077	1.46481	0.4
ENSGALG00000023439	DFNB59	-2.78913	0.0402206	0	0
ENSGALG00000001062	GGT7	-2.7876	0.00146397	0.0566215	0.654545
ENSGALG00000025516	gga-mir-1753	-2.78653	0.0140136	0.0662686	0.0181818
ENSGALG00000009556	PRICKLE1	-2.78088	0.000592477	2.5829	0.327273
ENSGALG00000001327	AIRE	-2.77248	0.0260836	0	0
ENSGALG00000022280		-2.75513	0.0284854	0	0
ENSGALG00000029035		-2.75191	0.0452264	0	0
ENSGALG00000023626	NTN1	-2.74701	0.0437718	0	0
ENSGALG00000008881	RGS3	-2.74346	0.00249024	2.76835	0.436364
ENSGALG00000010772	RGS7	-2.73445	0.0482676	0	0
ENSGALG00000017310	XRRA1	-2.7279	0.0489767	0	0
ENSGALG00000020109		-2.70907	0.0499374	0	0
ENSGALG00000028616	CELSR2	-2.69522	0.0394336	0	0
ENSGALG00000015494	HTR1F	-2.69435	0.0437103	0	0
ENSGALG00000027920	CPLX2	-2.69045	0.00216509	0.0670616	0.0909091
ENSGALG00000013576	Mel1a	-2.68886	0.0320588	0.00607686	0.0181818
ENSGALG00000026250	DOK2	-2.68304	0.0431191	0	0
ENSGALG00000028433	BIN2	-2.68186	0.00525952	0.00358442	0.0181818
ENSGALG00000009628	KCTD12	-2.67195	0.0350226	0.9842	0.163636
ENSGALG00000010588		-2.6695	0.0497935	0	0
ENSGALG00000015186	KLHL14	-2.66876	0.0132732	0.306298	0.145455
ENSGALG00000001716	C15orf59	-2.66479	0.02692	0	0
ENSGALG00000014250	phox2b	-2.66253	0.0284044	0	0
ENSGALG00000018934	ACVRL1	-2.66069	0.0338979	0	0
ENSGALG00000015152	BOC	-2.65064	0.0148739	1.31871	0.290909
ENSGALG00000006507	CLMP	-2.64386	0.00274405	2.60054	0.381818
ENSGALG00000023303	Six2	-2.6338	0.00690367	0.0322251	0.0363636
ENSGALG00000003443	LRRC52	-2.63125	0.0473498	0.0769147	0.0545455
ENSGALG00000024095		-2.61666	0.0163487	0	0
ENSGALG00000026054		-2.61623	0.000970116	0.0410734	0.0909091
ENSGALG00000027240	TSPAN13	-2.61349	0.00010841	6.93947	0.854545
ENSGALG00000011170	WIPF3	-2.61179	0.016693	0	0
ENSGALG00000003921	DBNDD2	-2.59734	0.0103057	2.53812	0.272727
ENSGALG00000012790	DSP	-2.59405	0.0179223	1.01179	0.472727
ENSGALG00000014910	COLEC12	-2.59091	3.51045e-06	10.2786	0.872727
ENSGALG00000019806		-2.58049	0.0269253	0	0
ENSGALG00000021448	ROBO3	-2.57402	0.0474933	0	0
ENSGALG00000009362	ITGA6	-2.56916	1.10516e-08	4.00562	0.709091
ENSGALG00000007305	NME1	-2.56793	1.49744e-05	0.392268	0.709091
ENSGALG00000026147	PLVAP	-2.55489	0.0338979	0.0336339	0.0545455
ENSGALG00000013193	irx2	-2.5518	0.0209831	0.543165	0.290909
ENSGALG00000017169	ELMOD1	-2.5474	0.0459054	2.02559	0.327273
ENSGALG00000013743	ENPP7	-2.54089	0.0421924	0	0
ENSGALG00000006907	SOWAHA	-2.53441	0.024124	0.0925772	0.163636
ENSGALG00000018272	gga-mir-301a	-2.53153	0.00581454	0.0909265	0.0181818
ENSGALG00000005435	PKD1L3	-2.53079	0.0298714	0	0
ENSGALG00000007766	KIAA1217	-2.52988	0.00868861	0.733089	0.381818
ENSGALG00000007364	TOB	-2.52618	0.000995696	1.4124	0.327273
ENSGALG00000011469	IGFBP2	-2.52219	0.0399335	0.0116396	0.0181818
ENSGALG00000026698	FEV	-2.51021	0.0443604	0	0
ENSGALG00000009959		-2.5034	0.0120454	4.43254	0.418182
ENSGALG00000009020	JAG1	-2.49974	0.00274562	2.16569	0.218182
ENSGALG00000026714	SHISA2	-2.49253	1.59809e-06	8.899	0.818182
ENSGALG00000015425	LPL	-2.48981	0.0413703	1.72285	0.163636
ENSGALG00000009007	C2orf71	-2.48781	0.0221538	0	0
ENSGALG00000005292	KLHL40	-2.48038	0.0437256	0	0
ENSGALG00000028278		-2.47456	0.0458481	0	0
ENSGALG00000010828		-2.46071	0.0303394	0	0
ENSGALG00000025889	RMST_6	-2.44445	0.0460162	0	0
ENSGALG00000012370	C3H6ORF72	-2.39266	0.0316013	1.86637	0.2
ENSGALG00000009151		-2.3901	0.0470025	0	0
ENSGALG00000027168	CCDC3	-2.38003	0.0241603	1.02033	0.2
ENSGALG00000006210	Id1	-2.36763	1.12662e-14	74.3831	0.981818
ENSGALG00000021479		-2.36749	0.0289304	0	0
ENSGALG00000002749		-2.35583	3.21317e-06	0.479463	0.381818
ENSGALG00000005120	FBLN2	-2.35227	0.00249024	4.961	0.509091
ENSGALG00000017059	MAB21L1	-2.34194	0.0182139	0.272113	0.2
ENSGALG00000026824	SNTA1	-2.31145	0.00552733	1.06363	0.436364
ENSGALG00000006300	LDHA	-2.31037	0.000503339	22.4988	0.709091
ENSGALG00000027198	TMEM47	-2.28877	0.046289	1.64391	0.345455
ENSGALG00000015879	HUNK	-2.28512	0.0116241	1.55894	0.363636
ENSGALG00000011778	ITGB5	-2.28304	0.000320284	5.81796	0.654545
ENSGALG00000007929	DIXDC1	-2.26968	0.0290726	2.24057	0.272727
ENSGALG00000011250	ASIC4	-2.26896	0.0469808	0	0
ENSGALG00000003957	APOH	-2.26679	0.00418112	0.568933	0.709091
ENSGALG00000010029	BEST3	-2.25452	0.0399091	0.0212131	0.236364
ENSGALG00000016358	PTCHD1	-2.25394	0.00525952	1.62228	0.418182
ENSGALG00000009470	SERPINI1	-2.239	0.000659575	8.76841	0.6
ENSGALG00000017261	TENM4	-2.23616	0.00613478	0.765073	0.563636
ENSGALG00000007047	GAL	-2.22391	0.0109247	6.75755	0.490909
ENSGALG00000027835	PCBD1	-2.22215	5.92522e-07	14.7589	0.763636
ENSGALG00000004900	FAM101B	-2.21781	0.0465588	0.480628	0.163636
ENSGALG00000005016	ZNF608	-2.21704	0.00278784	1.15219	0.436364
ENSGALG00000006323	LECT2	-2.19937	0.0497935	0	0
ENSGALG00000011484	CMTM8	-2.18832	0.000232916	18.2762	0.8
ENSGALG00000015622	EYA1	-2.18763	0.000168936	4.33459	0.545455
ENSGALG00000010706	TENM3	-2.17942	0.000450998	0.803025	0.545455
ENSGALG00000029127		-2.17879	0.0468309	0.00930071	0.0181818
ENSGALG00000027495	LRRC16B	-2.16094	0.0203776	0.183234	0.454545
ENSGALG00000027069	TSC22D3	-2.14074	0.0343346	2.3294	0.327273
ENSGALG00000016614	SHROOM2	-2.13409	0.0443721	0.56135	0.290909
ENSGALG00000019647		-2.10619	0.0274577	0	0
ENSGALG00000015732	PKIA	-2.10383	0.0256318	1.77783	0.272727
ENSGALG00000027737	CIDEA	-2.09466	0.0159604	1.82086	0.654545
ENSGALG00000021087		-2.09047	0.0158785	1.09527	0.6
ENSGALG00000015377	PHLDB2	-2.08309	1.57581e-06	3.38637	0.654545
ENSGALG00000011476	2017-09-11	-2.06513	3.91655e-14	15.1228	0.963636
ENSGALG00000005503	WFDC1	-2.0523	0.000464314	9.38395	0.690909
ENSGALG00000023819		-2.04186	0.00378466	3.63682	0.654545
ENSGALG00000001813		-2.03408	0.0023996	0.529036	0.436364
ENSGALG00000016111	CSMD3	-2.0286	0.00906239	0.0761799	0.727273
ENSGALG00000027360	uc_338	-2.027	4.30143e-08	6.1414	0.6
ENSGALG00000011339	IGFBP7	-2.02221	8.52964e-10	8.38012	0.981818
ENSGALG00000004508	EYA2	-2.00566	0.00916933	7.39683	0.490909
ENSGALG00000002228	SAMD11	-2.00064	0.0476182	1.27925	0.309091

## Sheet: DEG_info_HH11_cluster2_up.txt
ensid	Name	HH11 Cluster 2_v_other_DE.up.HH11 Cluster 2_v_other.log2fc	HH11 Cluster 2_v_other_DE.up.HH11 Cluster 2_v_other.padj	mean_rpkm	pct_above_0_rpkm
ENSGALG00000001866	GPR151	5.88668	4.17878e-13	2.16242	0.0909091
ENSGALG00000027133	CD83	5.22649	1.55297e-13	0.355135	0.0363636
ENSGALG00000013234	HAPLN2	4.72722	1.40758e-08	5.61485	0.345455
ENSGALG00000004138	TDRD5	4.70786	1.94093e-08	0.426114	0.0727273
ENSGALG00000027412		4.54848	1.27462e-10	0.408057	0.2
ENSGALG00000008351	CAV3	4.46665	7.91863e-08	3.18476	0.254545
ENSGALG00000023459	MC1R	4.43581	1.63122e-07	2.89972	0.236364
ENSGALG00000004627	LAMC2	4.30798	1.64033e-11	0.227921	0.0363636
ENSGALG00000011544	BCL2L14	4.224	2.90622e-07	0.746223	0.145455
ENSGALG00000021512		4.10518	4.48942e-09	5.20397	0.472727
ENSGALG00000029089		4.07852	8.23161e-07	1.14161	0.0909091
ENSGALG00000028194		3.83624	1.33996e-06	1.1117	0.145455
ENSGALG00000000619	ANGPTL4	3.82182	8.59595e-07	6.0871	0.618182
ENSGALG00000006473	PLXNA4	3.81949	4.09721e-14	48.2062	0.963636
ENSGALG00000017269		3.73277	0.000123288	0.524956	0.127273
ENSGALG00000001825	FAM13C	3.58229	2.21727e-10	0.319519	0.0909091
ENSGALG00000004163	NPHS2	3.51996	0.00171246	1.543	0.0909091
ENSGALG00000008554	IL17REL	3.44532	0.000290128	33.6206	0.6
ENSGALG00000012446	ELFN2	3.40602	7.1177e-05	0.277221	0.0363636
ENSGALG00000027460	gga-mir-6621	3.34333	8.63865e-17	24.2051	0.818182
ENSGALG00000004173	AXDND1	3.13005	0.000370118	0.203336	0.0727273
ENSGALG00000023192		3.12536	1.0676e-07	0.426413	0.0363636
ENSGALG00000005152	TRPV4	3.10017	0.00378466	2.09659	0.163636
ENSGALG00000007849	CD44	3.05144	0.00209179	7.35184	0.327273
ENSGALG00000006725	ACAN	3.04301	0.00202144	0.37904	0.181818
ENSGALG00000006551	tyrosine	3.03472	0.00929408	1.76612	0.109091
ENSGALG00000028452	GNAT2	3.0165	5.19418e-06	0.29463	0.0363636
ENSGALG00000011235	GALNT15	3.00445	0.00176751	1.76032	0.236364
ENSGALG00000013515	SLC4A5	2.99561	0.00195993	0.174586	0.0181818
ENSGALG00000012155	EGF	2.97801	0.00456306	0.280135	0.0363636
ENSGALG00000009050	CAPN3	2.94494	0.00112981	0.285765	0.0909091
ENSGALG00000004129	SPP2	2.92553	0.000593062	0.614824	0.0363636
ENSGALG00000021490	ADGRG3	2.91715	0.00714424	0.453594	0.0363636
ENSGALG00000002511	SYCP1	2.91694	0.00105184	0.400132	0.0909091
ENSGALG00000006376	TMC3	2.91592	0.0067568	0.296249	0.0363636
ENSGALG00000027443	RGS22	2.90145	0.0040803	0.187501	0.0545455
ENSGALG00000016600	Pomc	2.88815	0.00123629	0.459042	0.0545455
ENSGALG00000013795	HIVEP2	2.88049	0.00550415	1.81591	0.454545
ENSGALG00000010342	OTOGL	2.87276	0.00249024	3.60166	0.509091
ENSGALG00000010486	JAKMIP3	2.86258	0.00459156	0.333946	0.0727273
ENSGALG00000001156	RNF222	2.85846	2.33304e-09	0.484451	0.0545455
ENSGALG00000015476	CLVS1	2.85717	0.00531868	2.37159	0.145455
ENSGALG00000017345	HBG1	2.8556	8.23161e-07	3.88899	0.709091
ENSGALG00000008105		2.83719	0.000832339	0.245965	0.0181818
ENSGALG00000010024		2.82372	0.00153931	0.484096	0.0545455
ENSGALG00000016797	FHL2	2.82169	0.000848415	23.6566	0.690909
ENSGALG00000007463	HBAD	2.80075	0.00206612	1.36408	0.236364
ENSGALG00000024490	TMEM156	2.7935	0.0119982	1.39138	0.109091
ENSGALG00000010755	SCRG1	2.79168	0.00176751	2.00543	0.218182
ENSGALG00000007781	GAL3ST1	2.78723	1.10419e-05	19.1719	0.836364
ENSGALG00000002413	CELF4	2.76935	0.00525952	6.78585	0.381818
ENSGALG00000001955	AANAT	2.7638	5.92743e-05	0.239926	0.0545455
ENSGALG00000006436	AQP12	2.7529	0.0112359	0.972845	0.0545455
ENSGALG00000013782	CDH7	2.75128	0.000219047	21.2321	0.8
ENSGALG00000027167		2.74273	0.000313937	4.0748	0.509091
ENSGALG00000027687		2.71637	3.37931e-06	0.299383	0.236364
ENSGALG00000026733	FFAR4	2.71636	0.000744808	0.588427	0.145455
ENSGALG00000014127	TXK	2.70448	0.000132079	0.340274	0.218182
ENSGALG00000014675	RHOBTB3	2.69227	0.00882592	1.02522	0.145455
ENSGALG00000021121		2.68307	0.000887324	0.545006	0.0545455
ENSGALG00000002638		2.67064	0.00626536	0.139133	0.0181818
ENSGALG00000014124	TEC	2.66948	0.00251591	11.1127	0.672727
ENSGALG00000006740	MUC5AC	2.66869	0.0123876	0.122238	0.127273
ENSGALG00000015034	ANKRD29	2.65207	0.0107532	1.14478	0.0545455
ENSGALG00000010707	GPR68	2.65061	0.00073168	0.324925	0.0363636
ENSGALG00000004545	WDR72	2.64286	0.0243957	0.69471	0.109091
ENSGALG00000008615	LTK	2.63363	2.10831e-08	43.1959	1
ENSGALG00000000562	LAPTM5	2.62934	0.0131717	0.745065	0.0181818
ENSGALG00000016101	TRHR	2.62498	0.0123114	0.825521	0.0545455
ENSGALG00000003114	NOG	2.61169	8.58276e-05	42.1414	0.836364
ENSGALG00000001695	GABRA6	2.61134	0.0083001	0.148888	0.0363636
ENSGALG00000007740		2.5869	0.000328761	1.25947	0.509091
ENSGALG00000023821	DHX58	2.58541	0.00762695	0.21544	0.0181818
ENSGALG00000004358	AMZ1	2.57732	0.00980522	0.43477	0.0727273
ENSGALG00000015936	C21orf62	2.56893	0.0130473	1.29824	0.0545455
ENSGALG00000007620	GFRA3	2.56403	0.00460134	5.20228	0.363636
ENSGALG00000016780	RFX8	2.54676	0.0026153	0.565498	0.218182
ENSGALG00000016577	OTOF	2.54065	0.0183083	0.142752	0.0363636
ENSGALG00000005631	TRPM2	2.52269	0.0270261	0.348937	0.0909091
ENSGALG00000005928	XAF1	2.52103	0.0156714	0.597085	0.0363636
ENSGALG00000028273	HBG2	2.50781	0.00123651	0.261308	0.0727273
ENSGALG00000003859	KRT222	2.49966	0.00278784	6.6874	0.527273
ENSGALG00000012290	SOX10	2.49463	1.6568e-07	231.836	1
ENSGALG00000004463	PRSS56	2.49231	0.0212127	0.722466	0.109091
ENSGALG00000016341	CSMD1	2.4886	0.00718204	1.96545	0.563636
ENSGALG00000011287		2.47825	0.00708387	6.49936	0.545455
ENSGALG00000026754		2.47266	0.00626536	12.2231	0.563636
ENSGALG00000005714	PKD1	2.47034	0.0139093	0.456997	0.2
ENSGALG00000011104	GCG	2.461	0.00540493	0.118994	0.0363636
ENSGALG00000012146	MGAT3	2.45876	0.0111798	1.83473	0.254545
ENSGALG00000002559	HMHA1	2.44445	0.00308492	0.717186	0.309091
ENSGALG00000011157	TRIM67	2.44392	0.0075907	0.448698	0.109091
ENSGALG00000000382		2.42246	0.04548	0.760699	0.0727273
ENSGALG00000012538	NR4A2	2.42118	0.0178424	0.987117	0.272727
ENSGALG00000011358	Wnt6	2.41458	0.0255086	2.64115	0.218182
ENSGALG00000019003		2.40938	8.20848e-05	20.1553	0.945455
ENSGALG00000007417	ARMC4	2.40689	0.00231728	8.74419	0.854545
ENSGALG00000007963	NFATC2	2.40631	0.0237084	1.1314	0.145455
ENSGALG00000001745	PSTPIP2	2.40296	0.0490223	1.36965	0.127273
ENSGALG00000002299	RGR	2.40246	0.0384909	0.415012	0.0727273
ENSGALG00000001806		2.39659	0.0126119	0.380443	0.0363636
ENSGALG00000028580	C15orf48	2.38988	0.00531868	0.164424	0.0181818
ENSGALG00000027624		2.38974	0.0127886	0.104348	0.0363636
ENSGALG00000007815	ANKK1	2.38877	0.0203647	0.1953	0.0545455
ENSGALG00000015838	MRAP2	2.3843	0.00894527	0.543562	0.0545455
ENSGALG00000006374	TBX6	2.37035	0.0282154	0.382804	0.0363636
ENSGALG00000004525	TSPAN10	2.36862	0.0202514	1.44506	0.181818
ENSGALG00000018499		2.36852	0.00220778	3.04615	0.6
ENSGALG00000009680	PAQR7	2.36392	0.000132079	19.903	0.890909
ENSGALG00000011609	ABTB2	2.34887	3.3104e-05	9.32862	0.927273
ENSGALG00000003952	RBPJL	2.3466	0.00283096	4.81962	0.636364
ENSGALG00000025866		2.34652	0.00795639	7.26892	0.327273
ENSGALG00000000780	SMPD3	2.33036	3.18964e-09	59.2031	1
ENSGALG00000027130		2.31265	0.0146433	0.926306	0.218182
ENSGALG00000015075		2.31053	0.00108146	21.8576	0.818182
ENSGALG00000027622	ADAM11	2.30986	0.0221436	0.277826	0.145455
ENSGALG00000006084	Wnt8c	2.30311	0.0469355	0.490088	0.0181818
ENSGALG00000005541	GJB1	2.30169	4.52734e-07	60.0144	0.945455
ENSGALG00000012195		2.29145	0.0371587	0.358587	0.0909091
ENSGALG00000008761	SPAM1	2.29107	0.0331508	0.32672	0.0181818
ENSGALG00000027131		2.28577	0.0110186	9.88454	0.581818
ENSGALG00000010050	LRFN2	2.28344	0.0267775	1.65251	0.290909
ENSGALG00000001832	PHYHIPL	2.2781	0.00846207	9.00605	0.527273
ENSGALG00000014268	CHRNA9	2.27656	0.0445587	0.625029	0.0545455
ENSGALG00000016912	EDNRB	2.26589	9.70198e-05	27.2843	1
ENSGALG00000007319	CCDC64	2.26375	0.0148642	0.402632	0.109091
ENSGALG00000013304	SLC5A12	2.24587	0.0224182	0.197792	0.0545455
ENSGALG00000005246	PAX3	2.23275	0.000134335	28.0651	1
ENSGALG00000013729	NETO1	2.23193	0.0363727	0.258814	0.0181818
ENSGALG00000017106	ATP8A2	2.22356	0.0212151	3.57282	0.436364
ENSGALG00000010775	FMN2	2.20973	0.00285599	3.80715	0.872727
ENSGALG00000011288	DACT2	2.1982	9.64704e-08	298.259	1
ENSGALG00000012144	MIEF1	2.19251	0.00732325	5.95984	0.509091
ENSGALG00000012357	CXCR4	2.1899	1.94093e-08	275.936	1
ENSGALG00000017332		2.18629	0.0208506	11.1206	0.636364
ENSGALG00000024062	RPRML	2.18105	0.012155	2.60829	0.218182
ENSGALG00000020788	CCDC141	2.17992	0.000277826	26.571	0.981818
ENSGALG00000003457	CNP	2.17139	0.000684837	12.9393	0.872727
ENSGALG00000000194		2.16583	0.0162259	0.10431	0.0363636
ENSGALG00000016680	TFAP2B	2.14921	4.30143e-08	403.92	1
ENSGALG00000013861	TNFAIP3	2.14027	0.00948031	9.88925	0.636364
ENSGALG00000005263	SOX8	2.12909	1.10516e-08	26.8301	1
ENSGALG00000011859	GBE	2.11636	0.0024807	15.8854	0.727273
ENSGALG00000006629	RBP4	2.10908	0.0290206	16.7625	0.509091
ENSGALG00000013892	MAP3K5	2.10438	0.000239573	15.2193	0.872727
ENSGALG00000014861	NIM1	2.07574	0.0307357	0.296885	0.0545455
ENSGALG00000025328	gga-mir-1601	2.07341	1.63243e-09	46.1515	0.945455
ENSGALG00000012989	NINJ2	2.06505	0.0482543	7.99466	0.327273
ENSGALG00000010003		2.05459	0.0178424	0.277309	0.145455

## Sheet: DEG_info_HH13_Lead_like_dn.txt
ensid	Name	HH13 Lead-like_v_other_DE.dn.HH13 Lead-like_v_other.log2fc	HH13 Lead-like_v_other_DE.dn.HH13 Lead-like_v_other.padj	mean_rpkm	pct_above_0_rpkm
ENSGALG00000002594	TFPI	-9.05933	0.00985618	0.0256933	0.111111
ENSGALG00000014908	FST	-8.39086	0.0494615	0.0414751	0.259259
ENSGALG00000016224	MAOA	-7.83975	0.0345592	0.0195976	0.148148
ENSGALG00000013766	DSEL	-7.1715	0.0356396	0	0
ENSGALG00000005114		-5.63936	0.0486292	0.191466	0.0740741

## Sheet: DEG_info_HH13_Lead_like_up.txt
ensid	Name	HH13 Lead-like_v_other_DE.up.HH13 Lead-like_v_other.log2fc	HH13 Lead-like_v_other_DE.up.HH13 Lead-like_v_other.padj	mean_rpkm	pct_above_0_rpkm
ENSGALG00000026584		6.77146	2.84905e-10	3.0906	0.037037
ENSGALG00000013993	VNN1	6.29847	1.18052e-09	6.28944	0.037037
ENSGALG00000009499	NPY5R	6.01026	1.39843e-06	13.0229	0.0740741
ENSGALG00000014823	C6orf58	5.59436	3.43519e-05	1.54722	0.037037
ENSGALG00000015347	ZPLD1	5.27095	0.00127334	70.4439	0.0740741
ENSGALG00000027965	OPRL1	5.2487	9.39189e-08	0.946981	0.111111
ENSGALG00000006320		4.90557	1.51905e-05	1.79877	0.111111
ENSGALG00000009382	CAPN8	4.87598	0.00065517	2.7971	0.037037
ENSGALG00000028158	FGF7	4.84363	0.000658484	3.49567	0.037037
ENSGALG00000016597	STMN4	4.79829	2.0853e-05	0.819593	0.0740741
ENSGALG00000022952	RNF212	4.7852	0.00240925	4.33788	0.037037
ENSGALG00000001300		4.59571	0.00057574	5.47722	0.0740741
ENSGALG00000016431	Pax5	4.58235	0.000268768	1.82273	0.037037
ENSGALG00000004742	BMP15	4.48262	4.12373e-06	0.636047	0.0740741
ENSGALG00000011582	SLC17A8	4.46223	0.003216	0.565135	0.037037
ENSGALG00000016804	SLC5A7	4.37813	0.00162777	0.384544	0.037037
ENSGALG00000004149	KCNK15	4.07272	0.00358356	2.95077	0.0740741
ENSGALG00000017052	CCNA1	4.01071	0.0239154	9.01926	0.111111
ENSGALG00000029170	NPBWR2	3.87023	0.038699	6.48806	0.111111
ENSGALG00000005554	ADIPOQ	3.86009	0.00934391	0.865195	0.037037
ENSGALG00000013659	NOX3	3.83699	0.0378388	6.53512	0.037037
ENSGALG00000009007	C2orf71	3.83164	0.000136134	0.330253	0.185185
ENSGALG00000009596	TMEM117	3.81214	0.0239866	1.67303	0.111111
ENSGALG00000007720	AIFM3	3.77696	0.0170156	1.16088	0.148148
ENSGALG00000020593		3.76794	0.00358356	2.61655	0.037037
ENSGALG00000002547		3.74206	0.00253472	0.963993	0.0740741
ENSGALG00000017212	GPR83	3.72545	0.00127424	0.702664	0.037037
ENSGALG00000022974	CCDC96	3.71874	0.0107902	3.7865	0.0740741
ENSGALG00000003747	OSMR	3.71146	0.0191836	11.8666	0.37037
ENSGALG00000007566		3.70189	0.0232946	11.0931	0.0740741
ENSGALG00000010293	Rd	3.68927	0.0239154	2.46541	0.0740741
ENSGALG00000009929	SOST	3.5712	0.0139434	6.77456	0.111111
ENSGALG00000006171		3.5441	0.0334481	8.05286	0.148148
ENSGALG00000004345	OIT3	3.52087	0.0170156	10.1789	0.259259
ENSGALG00000015336		3.5021	0.036182	0.769065	0.037037
ENSGALG00000003425		3.49655	0.0099947	0.903448	0.111111
ENSGALG00000026690		3.4781	0.020094	1.11625	0.037037
ENSGALG00000028308	TNS4	3.45686	0.000166526	2.96115	0.37037
ENSGALG00000000783	PTAFR	3.4492	0.0191836	0.856468	0.037037
ENSGALG00000000544	RAB44	3.43666	0.0283207	2.19951	0.037037
ENSGALG00000006424	JADE2	3.42641	0.0239866	0.488901	0.037037
ENSGALG00000027189		3.41758	0.0226548	1.71813	0.111111
ENSGALG00000027218	CRACR2A	3.30948	0.0245679	0.678231	0.037037
ENSGALG00000008702	OVOL2	3.30142	0.0335161	5.04343	0.259259
ENSGALG00000007692		3.27933	0.00430942	0.637465	0.037037
ENSGALG00000004790	WNT4	3.24232	0.000136134	16.9985	0.62963
ENSGALG00000023271		3.23416	0.0335161	0.415964	0.0740741
ENSGALG00000019014	SH2D2A	3.10656	0.0296843	0.611951	0.037037
ENSGALG00000000680	NUAK2	3.07521	0.020094	0.304229	0.0740741
ENSGALG00000025992	CDHR4	3.05216	0.00985618	1.83405	0.296296
ENSGALG00000025235	gga-mir-1746	3.04894	0.0335161	6.44841	0.0740741
ENSGALG00000006134	HOGA1	3.03191	0.0170156	0.331851	0.037037
ENSGALG00000005285	TBX4	3.00837	0.0191836	0.336171	0.037037
ENSGALG00000027537		2.97692	0.0249546	0.785099	0.111111
ENSGALG00000011277	PLEKHG7	2.85612	0.0283097	0.437034	0.148148
ENSGALG00000011937	NFE2L1	2.81864	0.0170156	8.70247	0.407407
ENSGALG00000008598		2.72801	0.0494615	1.88282	0.111111
ENSGALG00000005572	NOXO1	2.51713	0.0170156	4.70426	0.444444
ENSGALG00000023647	Gbx-1	2.16897	0.0250714	2.80536	0.518519
ENSGALG00000028472	TAGLN2	2.02052	4.02739e-12	17.3779	0.925926

## Sheet: DEG_info_HH15_Lead_like_dn.txt
ensid	Name	HH15 Lead-like_v_other_DE.dn.HH15 Lead-like_v_other.log2fc	HH15 Lead-like_v_other_DE.dn.HH15 Lead-like_v_other.padj	mean_rpkm	pct_above_0_rpkm
ENSGALG00000028400	GCHFR	-9.09311	4.97112e-05	0.0232656	0.0526316
ENSGALG00000006208	OTOG	-8.88087	0.00144423	0.00166842	0.0263158
ENSGALG00000001449	STRA6	-8.82954	2.45376e-06	0.041899	0.184211
ENSGALG00000015347	ZPLD1	-8.78329	0.0416551	0.00300372	0.0263158
ENSGALG00000015379	TAGLN3	-8.53183	0.0301455	0.0750531	0.131579
ENSGALG00000005272	CDH5	-8.45817	0.0379117	0	0
ENSGALG00000016127	SH3BGR	-8.39941	0.00142571	0.0150989	0.0526316
ENSGALG00000015140		-8.2081	0.000276763	0.00759607	0.0263158
ENSGALG00000027217		-8.19769	0.00036116	0	0
ENSGALG00000009089	titin	-8.18062	0.0240408	0	0
ENSGALG00000015599	SOHO-1	-8.1221	0.00107601	0.0145798	0.0789474
ENSGALG00000020679	PLEKHS1	-8.09419	0.0169193	0	0
ENSGALG00000006104	ADAMTSL3	-8.00938	0.0329812	0.0063377	0.0789474
ENSGALG00000010718	THSD7A	-7.98545	0.000652828	0.004189	0.0526316
ENSGALG00000023751	CYP26C1	-7.97583	1.99775e-05	0.0737548	0.263158
ENSGALG00000026853	FGF3	-7.94324	0.0095877	0.0110257	0.157895
ENSGALG00000010250		-7.93389	3.32826e-05	0.119712	0.236842
ENSGALG00000008554	IL17REL	-7.91614	0.00181366	0	0
ENSGALG00000004812	FAM129A	-7.87305	0.00246519	0.00225315	0.0263158
ENSGALG00000026616	KRT78	-7.82084	0.000765248	0.109932	0.263158
ENSGALG00000006666	BPIFB7	-7.74876	0.0249177	0.0381386	0.0789474
ENSGALG00000026881	PITX2	-7.7249	0.0141659	0.010297	0.0526316
ENSGALG00000004841	APLNR	-7.69512	3.34866e-05	0	0
ENSGALG00000012093	ELMO1	-7.69436	0.00241113	0.0138361	0.105263
ENSGALG00000001405	IRF6	-7.69218	0.000617924	0.0331376	0.131579
ENSGALG00000026366		-7.68518	0.00911954	0.00120133	0.0789474
ENSGALG00000026862	CLDN1	-7.66956	9.62474e-08	0.915598	0.631579
ENSGALG00000017136	GJB6	-7.64637	0.00327943	0	0
ENSGALG00000014934	HS3ST1	-7.60283	0.00145531	0	0
ENSGALG00000015876	ELOVL4	-7.5949	0.000112146	0	0
ENSGALG00000027207		-7.56126	0.0175408	0.00635605	0.0526316
ENSGALG00000011581	KIF26A	-7.54804	0.00145529	0.0249608	0.131579
ENSGALG00000001130	WBSCR17	-7.52513	0.00408112	0	0
ENSGALG00000003253	ATP8B1	-7.50053	0.00299576	0	0
ENSGALG00000027532	COLEC11	-7.49102	0.00911954	0	0
ENSGALG00000012278	EMCN	-7.48651	0.012128	0.0164444	0.0789474
ENSGALG00000002898	ALPK2	-7.4714	0.0279773	0	0
ENSGALG00000001407	ADAMTS15	-7.46697	0.00422203	0.0024163	0.0263158
ENSGALG00000006172	ABCC8	-7.46206	0.000231945	0.0123656	0.105263
ENSGALG00000008953	AASS	-7.45983	0.00513302	0.00394705	0.0526316
ENSGALG00000008006	CAPN6	-7.39687	0.0043758	0	0
ENSGALG00000005209	AQP1	-7.39022	0.0095877	0.0313813	0.0789474
ENSGALG00000007732	RTN4R	-7.38	1.28391e-06	0.00690609	0.0526316
ENSGALG00000012092	ESYT3	-7.37985	0.00953076	0.0179729	0.0789474
ENSGALG00000002775	FA2H	-7.37611	0.00141525	0.0142177	0.0789474
ENSGALG00000003212	TSPO2	-7.36037	5.90183e-05	0.0342035	0.0526316
ENSGALG00000009514	NRCAM	-7.33775	0.005399	0.00314115	0.0789474
ENSGALG00000006973	BLNK	-7.27486	0.0171189	0.00304238	0.0263158
ENSGALG00000025817	NHLH1	-7.23489	0.0129201	0.0634218	0.263158
ENSGALG00000006606	KIAA1324L	-7.21374	0.000900749	0.00280302	0.0526316
ENSGALG00000004028	MATN4	-7.19819	0.000451839	0.0208029	0.105263
ENSGALG00000001645	Segment	-7.18006	0.0148056	0.00204023	0.0263158
ENSGALG00000004044	CSRP3	-7.17865	0.0359132	0.0444066	0.0526316
ENSGALG00000010868	MACC1	-7.169	0.0455004	0.00419195	0.0789474
ENSGALG00000000365	NKX2-6	-7.16469	0.00792938	0	0
ENSGALG00000000826	MAPK13	-7.15405	9.00209e-05	0	0
ENSGALG00000006662	BPIFB3	-7.14489	0.0161778	0.00325549	0.0526316
ENSGALG00000008908	NEUROD1	-7.13934	0.0431849	0.00926924	0.0263158
ENSGALG00000027536	PERP	-7.13513	0.00571319	0.00258692	0.0263158
ENSGALG00000004849	WSCD2	-7.13445	0.00312913	0	0
ENSGALG00000000653	CNTN2	-7.11897	0.00271685	0.0100818	0.105263
ENSGALG00000005176	SCG2	-7.10933	0.0100829	0.0095076	0.0526316
ENSGALG00000024035		-7.09337	0.000193067	0.0107265	0.0789474
ENSGALG00000021024		-7.0886	0.00346056	0	0
ENSGALG00000011687	PRX	-7.08857	0.000152901	0.198679	0.184211
ENSGALG00000014398	PPARGC1A	-7.03665	0.0046819	0.00269557	0.0526316
ENSGALG00000016415	MAP7D2	-7.03307	0.00231066	0.0145369	0.0526316
ENSGALG00000012595	AGTPBP1	-6.99337	0.00971309	0	0
ENSGALG00000007831	TLX1	-6.98142	0.00574265	0.0740009	0.0789474
ENSGALG00000012988	B4GALNT3	-6.97727	0.00300896	0.00702415	0.0263158
ENSGALG00000001885		-6.97535	0.0158077	0.032534	0.0526316
ENSGALG00000005347	ADAMTS18	-6.97031	0.00101036	0.00995183	0.0526316
ENSGALG00000007772	CBLN4	-6.94844	0.0135658	0	0
ENSGALG00000006449	GRIP2	-6.945	0.00263775	0	0
ENSGALG00000009606		-6.92376	0.0120596	0	0
ENSGALG00000016367	SNTG2	-6.91263	0.0154648	0	0
ENSGALG00000014984	F2RL1	-6.9121	0.0156998	0	0
ENSGALG00000009173	GFRA1	-6.9044	0.00734799	0.00297263	0.0263158
ENSGALG00000010825	AGR2	-6.86594	0.0416551	0	0
ENSGALG00000010311	NAV3	-6.85424	0.00717795	0	0
ENSGALG00000002098	GRIK3	-6.84683	0.0095877	0	0
ENSGALG00000015572	CCDC125	-6.84615	0.0077766	0.00538197	0.0263158
ENSGALG00000014971	SLC2A9	-6.82395	0.00118258	0.00137307	0.0263158
ENSGALG00000000498	ACE	-6.80477	0.0179152	0	0
ENSGALG00000005453	PLCG2	-6.79144	0.0130571	0.0054725	0.0526316
ENSGALG00000005493	ITGB1BP2	-6.78948	0.0110443	0.0184116	0.0526316
ENSGALG00000002193	ARHGEF4	-6.78181	0.0207368	0.0119871	0.0263158
ENSGALG00000028628	LAPTM4B	-6.77786	0.0157332	0	0
ENSGALG00000014687	EPHA1	-6.77421	0.00745984	0.00419661	0.0526316
ENSGALG00000015254	ST18	-6.76923	0.0353153	0	0
ENSGALG00000016826	ADPRHL1	-6.7574	0.0454358	0.0251405	0.0526316
ENSGALG00000009612	TGFB2	-6.74933	0.00021723	0.0288332	0.105263
ENSGALG00000010299	RSPH9	-6.74633	0.00246519	0.0195642	0.0263158
ENSGALG00000020376		-6.74521	0.000430379	0	0
ENSGALG00000015968	ESRP1	-6.74275	0.00982914	0.0101218	0.0789474
ENSGALG00000022909	PTPN3	-6.73883	1.89069e-05	0.0430423	0.105263
ENSGALG00000002886	NKX2-5	-6.73111	0.0111427	0.0660852	0.105263
ENSGALG00000000600	PTPN7	-6.71811	0.00785929	0	0
ENSGALG00000014730	ELOVL7	-6.7136	0.0227193	0.00585621	0.0526316
ENSGALG00000005348	RBBP8NL	-6.71061	0.0218409	0	0
ENSGALG00000019232	CFAP44	-6.7	0.00107261	0.00236561	0.0263158
ENSGALG00000015531	PPP2R2C	-6.67826	0.0357084	0	0
ENSGALG00000006202	SCNN1B	-6.67584	0.00953654	0	0
ENSGALG00000007055		-6.65909	0.0228051	0	0
ENSGALG00000012894	7	-6.64321	0.0228229	0	0
ENSGALG00000011200	THBS2	-6.63783	0.0125246	0	0
ENSGALG00000010439		-6.63746	0.00635217	0	0
ENSGALG00000011041	DNAJC6	-6.63216	0.0181739	0	0
ENSGALG00000010497	SLC29A4	-6.60538	0.00180072	0	0
ENSGALG00000012018	CGT	-6.58434	0.0265351	0.00462959	0.0263158
ENSGALG00000014829	RSPO3	-6.57617	0.00734799	0	0
ENSGALG00000028048	PTN	-6.57369	6.41947e-07	0.415931	0.210526
ENSGALG00000006514	FSTL4	-6.56828	0.00936588	0.00318637	0.0263158
ENSGALG00000010724	VWDE	-6.56527	0.00547823	0	0
ENSGALG00000024000	7	-6.56455	0.0132521	0	0
ENSGALG00000016767	AFF3	-6.52121	0.0046819	0	0
ENSGALG00000015154	TRPM6	-6.50465	0.0141471	0	0
ENSGALG00000002744	PCDH15	-6.49151	0.0095877	0.0302714	0.105263
ENSGALG00000010909	PRKG2	-6.49114	0.0171189	0.00282694	0.0263158
ENSGALG00000007868	BCO2	-6.47458	0.0279773	0.00367017	0.0263158
ENSGALG00000011664	RASSF6	-6.47377	0.0129396	0.022945	0.0526316
ENSGALG00000013925	KIT	-6.46734	0.0380316	0	0
ENSGALG00000015602	CKMT2	-6.43467	0.0476408	0.00829289	0.0263158
ENSGALG00000010198	TPH2	-6.43178	0.0227193	0	0
ENSGALG00000014988	POPDC2	-6.3958	0.0341826	0.00472782	0.0263158
ENSGALG00000012647	RFX4	-6.39468	0.0262803	0.0067545	0.0263158
ENSGALG00000005936	AGTR2	-6.38447	0.0249177	0	0
ENSGALG00000009378	PDGFC	-6.38019	0.0032309	0	0
ENSGALG00000001946	RSPO1	-6.37942	0.0346515	0	0
ENSGALG00000000748	TJP3	-6.37072	0.00765375	0	0
ENSGALG00000016298	ADCY8	-6.36983	0.0129396	0.00543412	0.0526316
ENSGALG00000014884	ISL1	-6.3586	0.000285538	0.26524	0.315789
ENSGALG00000007911	CHL1	-6.35492	0.0251151	0	0
ENSGALG00000000920	CGN	-6.35389	0.00624891	0	0
ENSGALG00000007706	FGF8	-6.34523	0.0204911	0.0578941	0.0789474
ENSGALG00000020791	CLCA2	-6.33976	0.0331553	0.0768523	0.0789474
ENSGALG00000010812	RYR2	-6.33349	0.0434931	0	0
ENSGALG00000015123	ZDHHC23	-6.31843	0.0069356	0.00711127	0.105263
ENSGALG00000012290	SOX10	-6.29983	1.87028e-08	0.92762	0.605263
ENSGALG00000012890	DGKI	-6.29005	0.00426412	0	0
ENSGALG00000029072	NTN3	-6.28517	0.00518165	0	0
ENSGALG00000026947		-6.28479	0.000177886	0	0
ENSGALG00000010232	VRTN	-6.27709	0.0109822	0.0102335	0.0789474
ENSGALG00000003818	CYFIP2	-6.27697	0.0263813	0	0
ENSGALG00000019436	MAL2	-6.27449	0.0137127	0	0
ENSGALG00000014208	GRHL2	-6.27054	0.0101203	0	0
ENSGALG00000000371	CRHR1	-6.26802	0.0419561	0	0
ENSGALG00000001115	MMEL1	-6.26781	0.0165951	0	0
ENSGALG00000007645		-6.26469	0.0111427	0.00642664	0.0263158
ENSGALG00000027299	NTF3	-6.26433	0.0452234	0.00579529	0.0526316
ENSGALG00000016511	ADGRG2	-6.25997	0.0326453	0	0
ENSGALG00000002742	TMEM132B	-6.25943	0.0189126	0	0
ENSGALG00000008896	PPP1R1C	-6.25643	0.0168979	0	0
ENSGALG00000026200	FAM134B	-6.21928	0.0132992	0	0
ENSGALG00000028895		-6.20099	0.0158701	0.0134776	0.0263158
ENSGALG00000002957	SLC12A3	-6.19978	0.034579	0	0
ENSGALG00000012668	DCDC2	-6.19865	0.0323808	0.00144904	0.0263158
ENSGALG00000001812	ATCAY	-6.19321	0.00388824	0.0189633	0.105263
ENSGALG00000003645	PITPNM2	-6.19147	0.00574265	0.0236243	0.105263
ENSGALG00000016145	RIPK4	-6.17874	0.0232716	0	0
ENSGALG00000003744	ADAM19	-6.17679	0.043074	0	0
ENSGALG00000025774		-6.16834	0.000249836	0	0
ENSGALG00000005985	GDF10	-6.14911	0.0430918	0	0
ENSGALG00000009012	ZNF385B	-6.13302	0.0227193	0	0
ENSGALG00000007719	SHANK2	-6.12242	0.0338274	0	0
ENSGALG00000025822	CYP1B1	-6.11998	0.014741	0.00412617	0.0263158
ENSGALG00000006602	SYT8	-6.11837	0.0312556	0	0
ENSGALG00000013869	IL20RA	-6.11721	0.030803	0	0
ENSGALG00000007174	ChTL1A	-6.1172	0.00678474	0.0149663	0.0526316
ENSGALG00000001171	SEMA6B	-6.1144	4.06971e-05	0.0307633	0.0789474
ENSGALG00000012051	STAC	-6.08713	0.00689	0	0
ENSGALG00000028576	PAX1	-6.08294	0.0364931	0	0
ENSGALG00000011111	PGBD5	-6.05394	0.00638084	0	0
ENSGALG00000015290	LIX1	-6.05053	0.0163461	0.0232626	0.157895
ENSGALG00000012927	CDH10	-6.03563	0.0300595	0	0
ENSGALG00000012298	SLC39A8	-6.02876	0.0279773	0.0155306	0.0526316
ENSGALG00000024040	ANKMY1	-6.02526	0.0120622	0	0
ENSGALG00000022935	FOXI3	-6.02236	0.0109822	0	0
ENSGALG00000007349	RASL12	-6.01388	0.0178458	0.0108007	0.0526316
ENSGALG00000003895	PRDM12	-6.00332	0.0090413	0.0321124	0.0789474
ENSGALG00000012317	ADGB	-5.99591	0.0266797	0	0
ENSGALG00000007186	C9orf91	-5.97448	0.0329812	0	0
ENSGALG00000012292	BANK1	-5.9701	0.0222776	0	0
ENSGALG00000026683		-5.95868	0.000503698	0.00181395	0.0263158
ENSGALG00000011527	ENTPD3	-5.95541	0.0208156	0	0
ENSGALG00000010005	EPAS1	-5.9502	0.015673	0	0
ENSGALG00000004286	COL13A1	-5.93197	0.0298695	0.0352427	0.0789474
ENSGALG00000003777	NELL1	-5.91794	7.17381e-07	0.0969485	0.526316
ENSGALG00000029024	TCF21	-5.91038	0.0266797	0	0
ENSGALG00000010936	MYF6	-5.89142	0.0148293	0	0
ENSGALG00000009638	ANO6	-5.88936	0.0265737	0.00084342	0.0263158
ENSGALG00000013194	IRX1	-5.88094	0.000322898	0.0567706	0.131579
ENSGALG00000027555		-5.86833	0.00911954	0.00415613	0.0526316
ENSGALG00000012486	KCTD17	-5.85702	0.0279773	0	0
ENSGALG00000003761	NIPAL4	-5.8561	0.0389392	0	0
ENSGALG00000011202	COLQ	-5.85042	0.0271352	0	0
ENSGALG00000007573	STK32A	-5.84959	0.0494504	0.0123905	0.0263158
ENSGALG00000002475		-5.83928	0.00640604	0.0230167	0.0263158
ENSGALG00000006720		-5.83209	0.0323808	0	0
ENSGALG00000007667	GPR158	-5.83006	0.0363436	0.00111263	0.0263158
ENSGALG00000016324	GSTA3	-5.82907	0.0359045	0.0223226	0.0263158
ENSGALG00000008359	CD93	-5.82364	0.0324632	0	0
ENSGALG00000006472	KCNQ1	-5.80781	0.0249177	0	0
ENSGALG00000004641	MYO5C	-5.78389	0.0468529	0.0016533	0.0263158
ENSGALG00000001933	CORO2A	-5.77704	0.0350011	0	0
ENSGALG00000008952	noxa1	-5.77365	0.0296232	0	0
ENSGALG00000013244	ABCC9	-5.76417	0.0413631	0	0
ENSGALG00000024031	CYB561	-5.73527	0.0256758	0	0
ENSGALG00000009805	PPM1H	-5.73384	0.0174795	0	0
ENSGALG00000006873	RASSF7	-5.72241	0.00388387	0.0128662	0.0526316
ENSGALG00000012044	chAnk2	-5.70967	0.00448271	0.0185345	0.105263
ENSGALG00000016108	SYBU	-5.70029	0.0359848	0	0
ENSGALG00000002643	SELP	-5.6928	0.0249177	0	0
ENSGALG00000004309	GDAP1L1	-5.68383	0.00165597	0.0826611	0.0526316
ENSGALG00000000639	LRRN2	-5.68378	0.0127098	0	0
ENSGALG00000000695	MFSD4	-5.65475	0.0128179	0	0
ENSGALG00000008969	EPCAM	-5.65423	1.07737e-05	4.05308	0.605263
ENSGALG00000004275	RHOF	-5.6458	0.0178458	0.00719923	0.0263158
ENSGALG00000002289	CHAT	-5.64076	0.0169629	0	0
ENSGALG00000002888	CASZ1	-5.62692	0.0399984	0	0
ENSGALG00000007210		-5.61774	0.0497611	0.0810703	0.0263158
ENSGALG00000006032	IL13RA1	-5.60838	0.0298227	0	0
ENSGALG00000009957	TIE1	-5.60162	0.0497611	0	0
ENSGALG00000002993	CA10	-5.59899	0.00204406	0.0374963	0.105263
ENSGALG00000006911	TMC5	-5.59177	0.0157868	0	0
ENSGALG00000001558	MOV10	-5.58924	0.0333612	0	0
ENSGALG00000004936	GLRA4	-5.5883	0.0279773	0.00454536	0.0263158
ENSGALG00000003837	ADCY7	-5.58616	0.0284319	0	0
ENSGALG00000005102	CDH4	-5.58476	0.00246519	0.0222101	0.157895
ENSGALG00000004083	GluR1/A	-5.58291	0.0316117	0	0
ENSGALG00000013211	ST8SIA1	-5.57792	0.000112146	0.167908	0.105263
ENSGALG00000012791	TBXAS1	-5.57416	0.0116102	0	0
ENSGALG00000017027	THSD1	-5.57034	0.0340931	0	0
ENSGALG00000013454	HOXB1	-5.57002	0.00930137	0	0
ENSGALG00000012997	DNAH5	-5.56867	0.0303092	0	0
ENSGALG00000005657	CRHR2	-5.56219	0.014728	0	0
ENSGALG00000000587	PLEKHA6	-5.56173	0.0117482	0.00150996	0.0263158
ENSGALG00000011227	CDS1	-5.55985	0.02751	0	0
ENSGALG00000004119		-5.54748	0.0234766	0.00832935	0.0263158
ENSGALG00000008628		-5.53725	0.0284012	0	0
ENSGALG00000019144	GABRG3	-5.50796	0.0375168	0	0
ENSGALG00000010417		-5.4871	0.0401158	0	0
ENSGALG00000010364		-5.48222	0.0369696	0	0
ENSGALG00000019019	NTRK1	-5.48093	0.0154396	0.0137078	0.131579
ENSGALG00000005396	Wnt3a	-5.47936	0.0429218	0	0
ENSGALG00000003374	ESRP2	-5.46355	0.00443996	0.35661	0.184211
ENSGALG00000025748	Fgf9	-5.45884	0.0418285	0	0
ENSGALG00000026372	MANSC4	-5.45837	0.0492143	0.00730662	0.0526316
ENSGALG00000015847	PRSS35	-5.45458	0.0218552	0.0038626	0.0263158
ENSGALG00000015084	IGSF11	-5.44971	0.0486062	0.00159756	0.0263158
ENSGALG00000005752	ABCA4	-5.43298	0.0416551	0	0
ENSGALG00000028721	LMOD1	-5.43291	0.0226675	0	0
ENSGALG00000016592	PRPS2	-5.40832	0.037604	0	0
ENSGALG00000028250	ANKRD22	-5.39314	0.0473909	0	0
ENSGALG00000014689	FAM131B	-5.39047	0.00740392	0	0
ENSGALG00000010402	HPGDS	-5.38664	0.0350269	0	0
ENSGALG00000005577	SEZ6L	-5.38246	0.0376355	0	0
ENSGALG00000000313	TNNI1	-5.377	0.00600538	0.608833	0.263158
ENSGALG00000000607	GPR37L1	-5.36115	0.0217255	0	0
ENSGALG00000026395	TRABD2A	-5.3446	0.0355323	0	0
ENSGALG00000006112	SCN5A	-5.34318	0.0256101	0.00347389	0.105263
ENSGALG00000016543	NHS	-5.30433	0.0256499	0	0
ENSGALG00000023787		-5.30255	0.0379614	0	0
ENSGALG00000017652	TTC9	-5.3003	0.00911979	0	0
ENSGALG00000008599		-5.29638	0.0414378	0	0
ENSGALG00000012419		-5.29436	0.0154648	0	0
ENSGALG00000010156	DOCK8	-5.29241	0.0463989	0	0
ENSGALG00000014463	ACTN2	-5.2857	0.0375168	0.00712446	0.0263158
ENSGALG00000011861	SYT16	-5.25458	0.030725	0	0
ENSGALG00000016626	FBXO16	-5.24268	0.0455004	0	0
ENSGALG00000023740	HBZ	-5.23797	0.00711901	0	0
ENSGALG00000010213	VSX2	-5.22538	0.0327585	0	0
ENSGALG00000005892	SCUBE2	-5.20737	0.0489696	0	0
ENSGALG00000004035	CRYBA1	-5.16326	0.0111427	0	0
ENSGALG00000003333	GHDC	-5.15818	0.0246707	0	0
ENSGALG00000005247		-5.15594	0.0332919	0	0
ENSGALG00000006981	MCTP2	-5.15112	0.0292678	0.0256561	0.0789474
ENSGALG00000013234	HAPLN2	-5.14611	0.030803	0	0
ENSGALG00000010793	SLC24A4	-5.13908	0.0452687	0	0
ENSGALG00000013376	CAPSL	-5.13446	0.0179152	0	0
ENSGALG00000021525		-5.1321	0.0174263	0.0641751	0.0263158
ENSGALG00000014229	CFAP45	-5.12802	0.0187309	0	0
ENSGALG00000003016	MASP2	-5.11861	0.0489696	0	0
ENSGALG00000000548	MATN1	-5.11839	0.0305398	0	0
ENSGALG00000009355	CLDN11	-5.10992	0.00930137	0.0518101	0.0263158
ENSGALG00000006522	HCK	-5.10528	0.0163887	0	0
ENSGALG00000018998	UNC5A	-5.10491	0.0479339	0	0
ENSGALG00000016672	XKR5	-5.10204	0.013429	0.00631483	0.0263158
ENSGALG00000006120	PKD2L2	-5.09794	0.0208156	0.0755379	0.0526316
ENSGALG00000010903	RASGEF1B	-5.07831	0.0216738	0.288709	0.0526316
ENSGALG00000014812	SIDT1	-5.071	0.0439507	0	0
ENSGALG00000026465	TMEM100	-5.06668	0.00422203	0.393369	0.157895
ENSGALG00000000314	NEFL	-5.05725	0.0169193	0.624523	0.210526
ENSGALG00000003529	SYNC	-5.04598	0.0446308	0	0
ENSGALG00000004472	ASTN1	-5.03689	0.000680337	0.0110686	0.0789474
ENSGALG00000008961	PTPRZ1	-5.03112	0.00231066	0.273144	0.342105
ENSGALG00000001392	MMP23B	-5.01376	0.0046819	0	0
ENSGALG00000010801	TMEM61	-5.00525	0.0223007	0.0201231	0.0263158
ENSGALG00000010513	TCTN3	-4.96982	0.04083	0	0
ENSGALG00000002473	GPR157	-4.9596	0.0256758	0.0172509	0.0263158
ENSGALG00000012303	POU6F2	-4.95764	0.0416358	0	0
ENSGALG00000003512	SPINK7	-4.95742	0.013549	1.2655	0.289474
ENSGALG00000014657	ADGRV1	-4.95137	0.0369696	0.0259012	0.0526316
ENSGALG00000012989	NINJ2	-4.94917	0.0147085	0	0
ENSGALG00000004346	P2RY4	-4.94697	0.0474778	0	0
ENSGALG00000010397	GRID2	-4.94616	0.0397328	0.0477231	0.0526316
ENSGALG00000001235	ANKRD24	-4.93758	0.0432499	0	0
ENSGALG00000012163	BDNF	-4.93713	0.036504	0	0
ENSGALG00000002896	ENPP1	-4.93325	0.0386105	0	0
ENSGALG00000001846		-4.9292	0.000193067	0	0
ENSGALG00000015289	ARMC2	-4.9238	0.0240168	0.0294066	0.0526316
ENSGALG00000004653		-4.91619	0.0180492	0.00564656	0.0789474
ENSGALG00000004146	RIMS4	-4.91463	0.0241315	0	0
ENSGALG00000028091	MYF5	-4.89617	0.0017669	0.0344523	0.342105
ENSGALG00000010577	ARHGEF38	-4.89559	0.0433155	0	0
ENSGALG00000027655	TRABD2B	-4.88008	0.0482998	0.0316058	0.105263
ENSGALG00000001854		-4.87278	0.0335615	0.271165	0.263158
ENSGALG00000016341	CSMD1	-4.85929	0.0379264	0.0177124	0.0263158
ENSGALG00000007956	PLXDC2	-4.85551	0.0213117	0.0770823	0.0526316
ENSGALG00000003670		-4.84682	0.0017669	0.0467373	0.0789474
ENSGALG00000015126	TRPM3	-4.84019	0.0346515	0	0
ENSGALG00000009853	FOXG1	-4.82693	0.0249177	0	0
ENSGALG00000019672		-4.80659	0.00428092	0.0145673	0.0263158
ENSGALG00000010233	SYNDIG1L	-4.80003	0.0458249	0	0
ENSGALG00000026241	GRIN3B	-4.79428	0.012128	0.0389463	0.0263158
ENSGALG00000008109	CDHR3	-4.77334	0.0192315	0	0
ENSGALG00000027511	SP5	-4.76764	0.00130096	0	0
ENSGALG00000022557	cldn3	-4.75735	0.0182559	0.0468428	0.0789474
ENSGALG00000012032	PRRG4	-4.72902	0.0418113	0	0
ENSGALG00000015736	STMN2	-4.72532	0.0480356	0	0
ENSGALG00000027026		-4.70016	0.0340931	0	0
ENSGALG00000020615	STK32C	-4.67838	0.0256758	0	0
ENSGALG00000005087	FAM83G	-4.65623	0.0347411	0	0
ENSGALG00000021598		-4.64423	0.0364084	0.00601396	0.0263158
ENSGALG00000006835	TNNC2	-4.62899	0.0377264	0.293721	0.0526316
ENSGALG00000016933	DACH1	-4.6094	0.00753593	0.0911522	0.0789474
ENSGALG00000010773	GREM2	-4.59707	0.0379117	0	0
ENSGALG00000010958	PPFIA2	-4.58988	0.0446458	0.00755875	0.0789474
ENSGALG00000012932	FGD4	-4.57899	0.0382788	0.163223	0.0526316
ENSGALG00000016797	FHL2	-4.52349	0.0433501	0.271625	0.0526316
ENSGALG00000005210	WNK2	-4.51432	0.0156004	0.0538308	0.157895
ENSGALG00000012965	FAM105A	-4.50992	0.000390944	1.31364	0.157895
ENSGALG00000003838		-4.49039	0.0454358	0.0277477	0.0263158
ENSGALG00000021512		-4.47634	0.0151463	0	0
ENSGALG00000025733		-4.46025	0.030725	0	0
ENSGALG00000000164	MYBPH	-4.44436	0.0491382	0	0
ENSGALG00000007458	HBZ	-4.44181	0.0115454	0	0
ENSGALG00000008430	MAPK8IP1	-4.43916	0.0348528	0	0
ENSGALG00000013742	EZR	-4.43329	0.000503698	3.71752	0.578947
ENSGALG00000004790	WNT4	-4.4326	0.00245287	0.116669	0.289474
ENSGALG00000026817		-4.42713	0.0495969	0	0
ENSGALG00000025971	KCNK3	-4.41879	0.0211021	0.00579292	0.0263158
ENSGALG00000003554	OPTC	-4.41528	0.00120333	0.862145	0.131579
ENSGALG00000015221	CCDC181	-4.40559	0.0479339	0.0109503	0.0263158
ENSGALG00000015203		-4.39159	0.0241831	0	0
ENSGALG00000003642	PDGF-A	-4.38859	0.0300595	0.503566	0.105263
ENSGALG00000008976	ADAM22	-4.37742	0.0262803	0.051174	0.0263158
ENSGALG00000004096	CHRNA7	-4.35048	0.0497611	0	0
ENSGALG00000011902	TAGLN	-4.32222	0.0279773	1.48683	0.210526
ENSGALG00000013782	CDH7	-4.31096	0.0235866	0.298331	0.0789474
ENSGALG00000026506		-4.31032	0.0156004	0	0
ENSGALG00000000112	PLP1	-4.3074	0.0274335	0	0
ENSGALG00000010107	FHDC1	-4.26788	0.000150341	0.143798	0.184211
ENSGALG00000017589		-4.26634	0.0469884	0	0
ENSGALG00000027920	CPLX2	-4.24702	0.000102981	0	0
ENSGALG00000001442	OPCML	-4.243	0.0127609	0	0
ENSGALG00000003424	LMX1A	-4.24044	0.00865024	0.361342	0.105263
ENSGALG00000007468	HBAA	-4.23813	0.017051	0	0
ENSGALG00000026452	MURC	-4.23407	0.00574265	0.134833	0.131579
ENSGALG00000015364	GUCA1C	-4.23126	0.0253003	0	0
ENSGALG00000008734	PCSK2	-4.22706	0.0129396	0.196892	0.210526
ENSGALG00000011294	cTR	-4.22439	0.0243266	0.0273484	0.105263
ENSGALG00000006755	USP2	-4.2167	0.0404055	0.0106599	0.0526316
ENSGALG00000021706		-4.21353	0.0476048	0	0
ENSGALG00000029022	NPAS3	-4.20707	0.00316087	0.0376913	0.0526316
ENSGALG00000006245	KLF15	-4.19229	0.0484992	0	0
ENSGALG00000027737	CIDEA	-4.1918	0.000292063	0.400779	0.552632
ENSGALG00000015517	KLHL32	-4.15575	0.0158077	0.0148656	0.184211
ENSGALG00000012790	DSP	-4.15283	0.00571319	0.324559	0.184211
ENSGALG00000012429	BMP4	-4.14997	0.00233209	0.420691	0.184211
ENSGALG00000000608	CDH1	-4.14989	2.86678e-06	0.138513	0.5
ENSGALG00000023779	TMEM82	-4.14866	0.0332919	0	0
ENSGALG00000017374	SLITRK3	-4.14202	0.015559	0	0
ENSGALG00000002451	KCNT2	-4.12624	0.0211021	0.0767899	0.105263
ENSGALG00000001740	MGAT5B	-4.12142	0.0335635	0.00298081	0.0263158
ENSGALG00000000644	NFASC	-4.1136	0.00107261	0.482529	0.157895
ENSGALG00000015089	GAP43	-4.11311	0.0115454	0	0
ENSGALG00000003114	NOG	-4.11037	0.0107196	0.663534	0.0526316
ENSGALG00000000139		-4.10409	0.0221679	0	0
ENSGALG00000009026	CFAP69	-4.09171	0.0316117	0.275035	0.131579
ENSGALG00000014999	MAP1B	-4.07259	0.000711007	0.837641	0.289474
ENSGALG00000012913	PKP2	-4.06416	0.0448858	0.351793	0.184211
ENSGALG00000028857		-4.05556	0.0262803	0.00820936	0.0263158
ENSGALG00000029004		-4.05416	2.14743e-05	1.99525	0.236842
ENSGALG00000010566	NPNT	-4.03983	0.0416551	0.256999	0.157895
ENSGALG00000028506	NHSL2	-4.03834	0.0397582	0	0
ENSGALG00000003375	FOXP4	-3.99603	0.00923235	0.0794769	0.0263158
ENSGALG00000013598	SCGN	-3.99155	0.0219231	0.00665071	0.0526316
ENSGALG00000005321	LAMA5	-3.97687	0.00267609	0.109646	0.263158
ENSGALG00000006726	GATA3	-3.9711	0.00595214	0.187503	0.184211
ENSGALG00000011658		-3.95745	0.0363436	0	0
ENSGALG00000013722	SEMA3B	-3.94333	0.0209739	0.0125366	0.0526316
ENSGALG00000005862		-3.94293	0.0452953	0	0
ENSGALG00000006204	CHST13	-3.94051	0.00740246	0.0908465	0.0789474
ENSGALG00000021271	MPZL3	-3.9386	0.000765248	3.9206	0.394737
ENSGALG00000029174	AES	-3.90047	0.00548732	0.0408007	0.0526316
ENSGALG00000024315		-3.89693	0.0452687	0	0
ENSGALG00000006665	GALNT6	-3.88962	0.00231066	0.428071	0.210526
ENSGALG00000027866		-3.88622	0.0476252	0	0
ENSGALG00000012169	KRT8	-3.88449	0.0140511	1.34701	0.236842
ENSGALG00000013674	TUSC3	-3.88104	0.0472057	0.367671	0.0789474
ENSGALG00000005422	PDLIM1	-3.8764	0.000331088	2.45284	0.315789
ENSGALG00000002911	MOXD1	-3.87108	4.23168e-05	2.83119	0.342105
ENSGALG00000010320	PAWR	-3.83885	0.0445382	0.645789	0.0789474
ENSGALG00000007740		-3.81505	0.00807721	0	0
ENSGALG00000025766		-3.81453	0.0416551	0	0
ENSGALG00000006389		-3.8141	0.0405698	0	0
ENSGALG00000012998	WNT5B	-3.81083	0.0169193	1.25867	0.289474
ENSGALG00000027240	TSPAN13	-3.79701	2.37138e-05	2.85877	0.789474
ENSGALG00000017345	HBG1	-3.7839	0.00690189	0.0305638	0.0526316
ENSGALG00000027167		-3.78155	0.0254647	0.0323838	0.0263158
ENSGALG00000004043	NBL1	-3.77703	0.0284012	0.0880023	0.0526316
ENSGALG00000027497	CFD	-3.77472	0.0219755	0	0
ENSGALG00000022994	SIX1	-3.76243	0.0043758	1.59461	0.394737
ENSGALG00000016216	NDRG1	-3.7581	0.0076854	1.47709	0.315789
ENSGALG00000028634	ADGRB2	-3.75807	0.0387114	0	0
ENSGALG00000001264	PLXNA2	-3.74302	0.0426254	0.132712	0.184211
ENSGALG00000010369	IGSF10	-3.74287	0.0492143	0.0115585	0.184211
ENSGALG00000004969	TIMP4	-3.73656	0.0491107	0	0
ENSGALG00000028089		-3.7193	0.0425973	0.00362002	0.0263158
ENSGALG00000011086	ACTA1	-3.71268	2.23503e-06	3.65248	0.921053
ENSGALG00000009131	NLGN1	-3.70865	0.0452953	0.12112	0.131579
ENSGALG00000007945	CRYAB	-3.70554	0.0380316	1.2387	0.0789474
ENSGALG00000002005		-3.6978	0.00492246	0.545171	0.105263
ENSGALG00000015348	ALCAM	-3.69276	0.00103005	2.38151	0.552632
ENSGALG00000026845		-3.6604	0.034062	0	0
ENSGALG00000015735		-3.64696	0.00431884	0	0
ENSGALG00000005967		-3.63391	0.0387791	0.578718	0.105263
ENSGALG00000004631	DRAXIN	-3.63239	0.0032309	3.83815	0.421053
ENSGALG00000013409		-3.60291	0.0298227	0	0
ENSGALG00000009239	TLR2-2	-3.58988	0.0479339	0	0
ENSGALG00000000317	NEFM	-3.57993	0.0394572	2.23832	0.315789
ENSGALG00000004593	SULF2	-3.57574	0.014741	1.29085	0.289474
ENSGALG00000023655		-3.57481	1.89069e-05	0.744983	0.236842
ENSGALG00000026138		-3.56726	0.0153098	0.321358	0.0526316
ENSGALG00000028234	SYNDIG1	-3.56629	0.00744108	0.112964	0.394737
ENSGALG00000010858	LRP2	-3.56035	0.0174129	0.130803	0.157895
ENSGALG00000026054		-3.54553	0.000418643	0	0
ENSGALG00000001169	CRB2	-3.54395	0.0095877	0.48541	0.368421
ENSGALG00000007955	SLC16A5	-3.50455	0.0455004	0.024961	0.0789474
ENSGALG00000016111	CSMD3	-3.48833	0.000594164	0.0245578	0.447368
ENSGALG00000014858	ADCYAP1	-3.48269	0.00950083	0.770495	0.157895
ENSGALG00000007748	SLC16A2	-3.43685	0.0158077	0.317492	0.0789474
ENSGALG00000015593	EPHA7	-3.43307	0.0435329	0.675663	0.236842
ENSGALG00000026697		-3.41818	0.0209845	0.193364	0.157895
ENSGALG00000013362	CABP7	-3.41511	0.0486784	0	0
ENSGALG00000009207	TRIM2	-3.39235	0.0296372	1.55609	0.263158
ENSGALG00000006832	WFDC2	-3.36309	0.0482242	0.103682	0.0526316
ENSGALG00000010738	TC2N	-3.35895	1.73469e-05	0.167143	0.710526
ENSGALG00000004753		-3.32978	0.0419561	0	0
ENSGALG00000027852		-3.3222	0.0145275	0	0
ENSGALG00000028339	AMIGO3	-3.30601	0.0174795	0.992492	0.421053
ENSGALG00000004844	SEMA6D	-3.30125	0.0119502	0.515323	0.263158
ENSGALG00000012357	CXCR4	-3.29035	5.01727e-05	10.0652	0.684211
ENSGALG00000007781	GAL3ST1	-3.28531	0.0413631	0.541021	0.157895
ENSGALG00000016281	DMD	-3.26535	3.4427e-05	0.638104	0.394737
ENSGALG00000018947	KRT5	-3.26166	0.0469838	0	0
ENSGALG00000015075		-3.22986	0.0494504	0.751387	0.105263
ENSGALG00000025843		-3.20615	0.015916	0.00802753	0.0263158
ENSGALG00000022720		-3.19795	0.0332919	0	0
ENSGALG00000023937	CMC4	-3.18881	0.0430918	0.307	0.210526
ENSGALG00000007114	APOA1	-3.18281	0.0156998	5.81345	0.421053
ENSGALG00000027198	TMEM47	-3.16942	0.0439507	0.84308	0.236842
ENSGALG00000008615	LTK	-3.15546	0.00422664	1.45853	0.421053
ENSGALG00000015132	CDH2	-3.15191	0.00313396	2.90874	0.315789
ENSGALG00000001979	FBLN7	-3.1403	0.0182559	0.0501629	0.184211
ENSGALG00000023738	IRX6	-3.13263	0.0105099	0.0522405	0.0789474
ENSGALG00000001437	NTM	-3.11016	5.01727e-05	2.46438	0.421053
ENSGALG00000003582	SLC1A3	-3.08328	0.0256758	1.05266	0.131579
ENSGALG00000004518		-3.06735	0.000329864	1.01984	0.789474
ENSGALG00000028196		-3.06728	0.0402213	0	0
ENSGALG00000015903	FILIP1	-3.06632	0.0175876	0.802957	0.263158
ENSGALG00000021627	IFI27L2	-3.0659	0.0497611	1.99362	0.263158
ENSGALG00000029151	ISLR2	-3.06128	0.0476408	0	0
ENSGALG00000027569	CLDN4	-3.06092	0.0298227	0	0
ENSGALG00000014725	PLK2	-3.05992	0.0334503	1.28081	0.342105
ENSGALG00000026487		-3.0577	0.0133216	0.084139	0.0789474
ENSGALG00000025559	gga-mir-1677	-2.97764	0.0191565	0.122803	0.0263158
ENSGALG00000002427	SMIM5	-2.97173	0.0154648	0.703177	0.421053
ENSGALG00000014261	UCH-L1	-2.93616	8.40412e-06	32.1778	0.789474
ENSGALG00000011484	CMTM8	-2.92718	0.000170533	10.4266	0.736842
ENSGALG00000029023	DMRTB1	-2.92538	0.0241315	0.0129547	0.184211
ENSGALG00000001795	GFRA2	-2.92533	0.000515541	0.75243	0.236842
ENSGALG00000005751	RAB26	-2.92159	0.0371025	0.957439	0.263158
ENSGALG00000011609	ABTB2	-2.90063	0.0249177	0.40658	0.210526
ENSGALG00000007993	DCX	-2.8943	9.21371e-06	6.42939	0.447368
ENSGALG00000004994	ZNF703	-2.85285	0.000112146	0.289124	0.421053
ENSGALG00000009680	PAQR7	-2.85093	0.0480356	0.88263	0.210526
ENSGALG00000003163	GNAO1	-2.84925	0.0332042	1.22328	0.236842
ENSGALG00000003589	VTN	-2.80232	0.00731072	3.31166	0.342105
ENSGALG00000011893	SLC38A6	-2.7825	0.00930137	2.2525	0.552632
ENSGALG00000029175	EFNB2	-2.76394	0.0413631	0.989495	0.184211
ENSGALG00000022113		-2.75873	0.0435329	0.0586513	0.131579
ENSGALG00000010053	PTPRF	-2.74559	0.000176823	1.17226	0.421053
ENSGALG00000000056	DAPP1	-2.66441	0.0142305	0.841406	0.552632
ENSGALG00000000780	SMPD3	-2.66324	0.00181366	3.12902	0.710526
ENSGALG00000026400		-2.6577	0.000399309	0.980054	0.131579
ENSGALG00000025328	gga-mir-1601	-2.63447	0.000283645	2.21384	0.157895
ENSGALG00000011777	PDE4DIP	-2.63229	0.0224929	0.897496	0.421053
ENSGALG00000013124	FHOD3	-2.61033	0.00146565	1.18613	0.473684
ENSGALG00000000242	EBF2	-2.59976	0.0427056	6.05556	0.578947
ENSGALG00000011288	DACT2	-2.58872	0.00308453	17.4331	0.763158
ENSGALG00000006152		-2.58728	0.00913306	0.0667819	0.131579
ENSGALG00000005256	EPHA4	-2.58099	0.015673	3.1217	0.552632
ENSGALG00000003999	NAV2	-2.57032	0.000765248	0.773981	0.605263
ENSGALG00000026291	CDH3	-2.55367	5.76644e-06	6.51525	0.763158
ENSGALG00000001840	TEK	-2.54406	0.000369564	0.126598	0.815789
ENSGALG00000006059	INSC	-2.53537	0.0256758	0.074943	0.421053
ENSGALG00000007305	NME1	-2.53017	0.00145531	0.381094	0.763158
ENSGALG00000023819		-2.52352	0.0078105	2.406	0.526316
ENSGALG00000013239	NES	-2.52015	0.00207073	2.0266	0.5
ENSGALG00000006409	PODXL	-2.51964	0.000806313	6.34795	0.842105
ENSGALG00000006221	KIF1A	-2.49939	0.0160749	1.19531	0.368421
ENSGALG00000003767	NKD1	-2.48633	0.0179006	2.827	0.394737
ENSGALG00000007710		-2.48479	8.19461e-05	9.50093	0.526316
ENSGALG00000015970	COL9A1	-2.47321	0.00404356	5.30532	0.578947
ENSGALG00000022896	IRX4	-2.4493	0.0380989	0.0193595	0.0789474
ENSGALG00000001926	HSPB1	-2.4455	0.0221262	4.44865	0.447368
ENSGALG00000027139	KRT75	-2.43681	0.03219	0.0212142	0.0526316
ENSGALG00000027710	DAG1	-2.42822	0.0448858	0.286983	0.184211
ENSGALG00000007759	TMEFF2	-2.4126	0.0281658	0.784652	0.421053
ENSGALG00000027385		-2.39824	1.02264e-05	0.92393	0.578947
ENSGALG00000013363	NCALD	-2.39754	0.000976104	7.59034	0.552632
ENSGALG00000027684	TUBB6	-2.36681	0.00360925	8.86302	0.736842
ENSGALG00000018275	gga-mir-181a-2	-2.3668	0.000680337	4.51968	0.315789
ENSGALG00000012046	ARPP21	-2.36507	0.00740246	1.51295	0.578947
ENSGALG00000018274	gga-mir-181b-2	-2.36491	0.000680337	4.83872	0.315789
ENSGALG00000007839	NCAM1	-2.34222	0.000146837	3.14286	0.710526
ENSGALG00000027373		-2.33527	0.0218552	3.43547	0.421053
ENSGALG00000025738	RHOU	-2.32557	0.000586081	1.83237	0.526316
ENSGALG00000015537	MAN2B2	-2.31006	0.0350011	5.36082	0.421053
ENSGALG00000002714	TMEM132C	-2.26074	0.0224917	2.54673	0.421053
ENSGALG00000008512	GRIA3	-2.25644	0.00470188	0.166539	0.552632
ENSGALG00000016883	DOCK9	-2.24236	0.0214188	0.952811	0.605263
ENSGALG00000015774	CYYR1	-2.23846	0.0185932	7.49959	0.394737
ENSGALG00000027967	gga-mir-6630	-2.22796	0.000285538	4.02049	0.394737
ENSGALG00000013448	PARD3B	-2.22643	0.0383113	3.68776	0.394737
ENSGALG00000010384		-2.21998	0.0376213	2.26151	0.131579
ENSGALG00000026897		-2.212	0.00945101	4.78585	0.552632
ENSGALG00000026714	SHISA2	-2.21063	0.00154417	10.1595	0.815789
ENSGALG00000010715	CCDC88C	-2.20506	7.65803e-06	3.1908	0.894737
ENSGALG00000000681	PAK1	-2.20453	0.00970062	3.67186	0.605263
ENSGALG00000000528	DBNDD1	-2.19752	0.00385754	3.83725	0.526316
ENSGALG00000027172		-2.18903	0.0106867	4.64219	0.552632
ENSGALG00000027267		-2.16052	8.85891e-05	3.63413	0.921053
ENSGALG00000008423	SLC4A8	-2.15893	0.0429959	0.706578	0.289474
ENSGALG00000028539	TRAPPC3L	-2.15496	0.00398619	0.20371	0.657895
ENSGALG00000026781	ALOX5AP	-2.15388	0.0414416	0.0114708	0.0789474
ENSGALG00000011511	CKB	-2.11201	1.77844e-06	84.2923	1
ENSGALG00000002840	GRM4	-2.10222	0.0353785	1.29652	0.368421
ENSGALG00000011176	SCRN1	-2.08602	0.0169193	6.15641	0.473684
ENSGALG00000029025		-2.0628	0.0354947	0.355476	0.236842
ENSGALG00000009241	SFRP2	-2.04658	4.39449e-05	25.8867	0.842105
ENSGALG00000007076	CCNY	-2.04293	0.04425	0.383151	0.473684

## Sheet: DEG_info_HH15_Lead_like_up.txt
ensid	Name	HH15 Lead-like_v_other_DE.up.HH15 Lead-like_v_other.log2fc	HH15 Lead-like_v_other_DE.up.HH15 Lead-like_v_other.padj	mean_rpkm	pct_above_0_rpkm
ENSGALG00000009069	CAPN14	4.87336	8.45566e-14	0.599812	0.0789474
ENSGALG00000006454	SLC22A18	4.50443	4.23168e-05	2.03555	0.0526316
ENSGALG00000015573	FHL5	4.46285	2.57879e-06	5.08693	0.394737
ENSGALG00000023195	DLX6	4.25844	4.89291e-08	13.9734	0.947368
ENSGALG00000026187	NMNAT3	4.21793	8.40412e-06	0.427016	0.0789474
ENSGALG00000013606	FGL1	4.11467	1.77844e-06	15.2243	0.368421
ENSGALG00000017059	MAB21L1	3.88035	8.02382e-14	8.61105	0.868421
ENSGALG00000003814	Dkk-1	3.74822	6.41947e-07	99.8702	0.789474
ENSGALG00000013576	Mel1a	3.71416	1.46928e-05	1.61635	0.342105
ENSGALG00000004660	TRPV3	3.69764	0.00468102	2.27468	0.0526316
ENSGALG00000010980	STK31	3.59503	0.00468946	2.24319	0.157895
ENSGALG00000001706	GABRG2	3.50995	0.00154417	0.356395	0.0789474
ENSGALG00000005708	HNF4HH13 Lead-like	3.40645	0.00592108	1.47736	0.105263
ENSGALG00000020109		3.38887	0.0030023	1.60133	0.0526316
ENSGALG00000000808		3.18814	0.017784	0.894617	0.0789474
ENSGALG00000007395	ABCC2	3.1369	0.01094	0.267324	0.0263158
ENSGALG00000016635	MXRA5	3.13053	0.00118427	12.7795	0.736842
ENSGALG00000003386	SPTB	3.12143	0.00462382	0.183069	0.0263158
ENSGALG00000015461		3.1029	0.00159975	0.217749	0.0263158
ENSGALG00000010029	BEST3	3.03104	2.45621e-05	0.582656	0.210526
ENSGALG00000004386	Sox9	3.0218	7.96639e-09	35.5431	0.973684
ENSGALG00000027018		2.99836	0.0169193	1.81242	0.0526316
ENSGALG00000018439	DLX1	2.98476	0.000166598	192.592	1
ENSGALG00000009002	CPED1	2.93046	0.000329864	37.3866	0.947368
ENSGALG00000005318	OVCH2	2.91028	0.0205464	0.760223	0.0789474
ENSGALG00000002678	CSPG4	2.88828	0.0245857	0.235246	0.0526316
ENSGALG00000013293	GLDN	2.85132	0.0430329	1.853	0.0263158
ENSGALG00000026828	SH2D5	2.80146	0.0169453	0.660901	0.0526316
ENSGALG00000011076	SYNE3	2.78532	0.0419561	1.43082	0.131579
ENSGALG00000026147	PLVAP	2.75884	0.00127448	1.16076	0.473684
ENSGALG00000013371	S1PR4	2.73849	0.00329588	0.327922	0.0263158
ENSGALG00000025216	gga-mir-1645	2.72837	3.52215e-05	44.6149	0.842105
ENSGALG00000010331	MME	2.72632	0.00719746	19.8101	0.815789
ENSGALG00000010435	RASGRP3	2.71761	0.00181404	43.9723	0.868421
ENSGALG00000016802		2.69952	0.0264127	0.350543	0.0263158
ENSGALG00000015497	VGLL3	2.65872	0.00440838	0.270561	0.0263158
ENSGALG00000009509		2.64366	0.0296409	0.462689	0.0263158
ENSGALG00000007690	TFAP2C	2.63991	0.00484335	31.2549	0.842105
ENSGALG00000014141		2.6324	0.0162366	0.731137	0.157895
ENSGALG00000027243	EXPH5	2.62704	0.0451103	0.35592	0.0263158
ENSGALG00000027820	RBP1	2.62007	0.0218552	0.183369	0.0526316
ENSGALG00000009880	INPP4B	2.55004	0.00584847	7.29761	0.763158
ENSGALG00000016261	Nox2	2.54795	0.0310592	0.364476	0.0526316
ENSGALG00000018934	ACVRL1	2.52406	0.0389392	0.375434	0.157895
ENSGALG00000009004	ZNF804B	2.4855	0.0279773	0.103994	0.0263158
ENSGALG00000005131	BARX1	2.48506	0.0095877	3.89072	0.447368
ENSGALG00000027968		2.47336	0.0161778	4.42575	0.0526316
ENSGALG00000011009	SCN2A	2.41883	0.0486062	0.215929	0.0789474
ENSGALG00000012390	PPP1R14C	2.38437	0.000141215	64.0223	0.973684
ENSGALG00000016193	KCNK9	2.27637	0.0296372	0.423741	0.210526
ENSGALG00000005410	WNT5A	2.23074	3.53383e-09	47.1834	1
ENSGALG00000017173	GUCY1A2	2.2209	0.0139581	19.9653	0.789474
ENSGALG00000022819	PCP4	2.20914	1.83571e-05	219.484	1
ENSGALG00000013655	ZDHHC2	2.20682	7.52117e-05	82.0547	0.894737
ENSGALG00000027213	ALX1	2.20513	0.0482998	5.01846	0.710526
ENSGALG00000001934	OPN4-2	2.15877	0.0371025	0.145693	0.0526316
ENSGALG00000020390		2.0988	0.0353153	0.166198	0.0526316
ENSGALG00000006346	JSC	2.09462	0.000320477	455.901	1
ENSGALG00000010071	MAB21L2	2.0916	0.00879422	12.069	0.868421
ENSGALG00000009129	DLX5	2.08991	9.05498e-07	158.703	1
ENSGALG00000027069	TSC22D3	2.07582	0.00785929	29.3794	0.815789
ENSGALG00000005588	EVI2A	2.06728	0.0408973	0.682882	0.157895
ENSGALG00000007047	GAL	2.05934	0.00258659	86.3978	0.868421
ENSGALG00000026251	SPRY4	2.04885	0.00729168	1.30853	0.578947
ENSGALG00000001434	STOM	2.04813	0.00426412	43.079	0.894737
ENSGALG00000027841		2.02656	0.00034886	1.32099	0.605263
ENSGALG00000011686	SEMA5B	2.01875	4.18395e-05	83.3884	1
ENSGALG00000026173		2.01591	0.000305508	71.7963	0.921053
ENSGALG00000028136	CXCL12	2.00901	0.00431884	11.5297	0.947368

## Sheet: DEG_info_Trailblazer_dn.txt
ensid	Name	Trailblazer_v_other_DE.dn.Trailblazer_v_other.log2fc	Trailblazer_v_other_DE.dn.Trailblazer_v_other.padj	mean_rpkm	pct_above_0_rpkm
ENSGALG00000015347	ZPLD1	-9.09189	0.00288384	0	0
ENSGALG00000003782	Pax-7	-8.2972	3.65605e-11	0.0115356	0.0851064
ENSGALG00000015799	ELAVL2	-8.25459	0.000164762	0	0
ENSGALG00000018439	DLX1	-8.13661	1.98741e-09	0.0439011	0.0425532
ENSGALG00000027887		-8.1299	4.60514e-07	0	0
ENSGALG00000013782	CDH7	-8.08352	6.42413e-08	0.00955951	0.0638298
ENSGALG00000004322		-7.9578	6.42413e-08	0.00817302	0.0638298
ENSGALG00000010148	PTPRR	-7.88474	2.02666e-05	0	0
ENSGALG00000003320	CCDC180	-7.88003	2.6764e-06	0.00372584	0.0425532
ENSGALG00000020679	PLEKHS1	-7.8704	0.00287165	0.00199299	0.0212766
ENSGALG00000010342	OTOGL	-7.64094	1.84803e-05	0	0
ENSGALG00000012290	SOX10	-7.46804	1.96524e-15	0.416977	0.531915
ENSGALG00000020199	GPM6A	-7.37365	0.000624095	0	0
ENSGALG00000008908	NEUROD1	-7.28682	0.00550826	0.0051479	0.0212766
ENSGALG00000006666	BPIFB7	-7.24122	0.00477154	0.0708514	0.0212766
ENSGALG00000003014	CHRNA3	-7.2141	0.00079033	0	0
ENSGALG00000019651	AGR3	-7.21159	0.000363329	0	0
ENSGALG00000001832	PHYHIPL	-7.03929	5.33293e-06	0.00801038	0.0425532
ENSGALG00000004849	WSCD2	-6.93674	0.000290175	0.00219509	0.0212766
ENSGALG00000007781	GAL3ST1	-6.85697	2.63491e-08	0.0205306	0.0425532
ENSGALG00000006629	RBP4	-6.84151	1.08525e-05	0	0
ENSGALG00000015379	TAGLN3	-6.77176	0.0173484	0.3734	0.0638298
ENSGALG00000015531	PPP2R2C	-6.71531	0.00440038	0	0
ENSGALG00000010500	Nkx-6.2	-6.62659	0.00734234	0	0
ENSGALG00000000936	LMX1B	-6.61462	2.74069e-13	0.114172	0.0851064
ENSGALG00000000899	PSD2	-6.58	0.000666719	0	0
ENSGALG00000015254	ST18	-6.56461	0.00888548	0.00257773	0.0212766
ENSGALG00000015616	ACOT12	-6.53325	0.000196578	0	0
ENSGALG00000028895		-6.53077	0.000512077	0.00437874	0.0212766
ENSGALG00000001141	HES5	-6.50329	2.19431e-05	0.237413	0.12766
ENSGALG00000026754		-6.47122	4.13971e-05	0.0073104	0.0212766
ENSGALG00000006811	ZIC1	-6.44303	0.00128616	0.00260339	0.0212766
ENSGALG00000007980	KCNG1	-6.39949	0.000106102	0.0375217	0.12766
ENSGALG00000000371	CRHR1	-6.30494	0.0057905	0	0
ENSGALG00000012537	KCNJ3	-6.26387	2.10299e-05	0	0
ENSGALG00000012654	NFATC1	-6.26213	0.000103101	0	0
ENSGALG00000003193	CRABP-I	-6.24978	7.96739e-33	6.96444	0.638298
ENSGALG00000002957	SLC12A3	-6.23664	0.0041235	0	0
ENSGALG00000005985	GDF10	-6.186	0.00601164	0	0
ENSGALG00000012647	RFX4	-6.17416	0.00456938	0.0112741	0.0638298
ENSGALG00000012927	CDH10	-6.07247	0.00331927	0	0
ENSGALG00000015307	ABI3BP	-6.06696	0.0119715	0	0
ENSGALG00000003640	FAM20C	-6.03322	0.000149522	0	0
ENSGALG00000008281	NEURL	-5.98176	0.000241416	0.0169653	0.106383
ENSGALG00000005797	COL20A1	-5.97397	0.00158294	0	0
ENSGALG00000026710	DNAJC28	-5.97346	5.3942e-05	0	0
ENSGALG00000005628	COL9A3	-5.9308	7.83948e-19	0.563978	0.744681
ENSGALG00000006662	BPIFB3	-5.8641	0.0102368	0.0206311	0.0425532
ENSGALG00000012123	Pax-6	-5.85862	0.000430712	0.0537947	0.0638298
ENSGALG00000015618	ATP6AP1L	-5.82039	0.00213592	0.00452798	0.0212766
ENSGALG00000017332		-5.81396	0.000579203	0.0497989	0.0212766
ENSGALG00000009095	LHCGR	-5.78572	0.00239898	0.0104598	0.0638298
ENSGALG00000004859	ZNFX1	-5.75298	0.00163017	0	0
ENSGALG00000003895	PRDM12	-5.71938	0.00137306	0.0497494	0.0638298
ENSGALG00000020836		-5.67524	0.00223236	0.0166598	0.0212766
ENSGALG00000011371	STK36	-5.67226	0.0114615	0.00186183	0.0212766
ENSGALG00000006911	TMC5	-5.62838	0.00115952	0	0
ENSGALG00000003837	ADCY7	-5.62277	0.00303702	0	0
ENSGALG00000012421	ARHGAP15	-5.61303	0.0048847	0	0
ENSGALG00000017398		-5.60625	0.00848654	0	0
ENSGALG00000020554	ADAMTSL1	-5.58199	4.93661e-07	0.0353669	0.0851064
ENSGALG00000010820	CHGA	-5.54199	0.00879621	0.681385	0.0638298
ENSGALG00000017021	ATP7B	-5.54032	0.0113376	0	0
ENSGALG00000025748	Fgf9	-5.4953	0.00563052	0	0
ENSGALG00000002479	MAT1A	-5.48753	0.0133254	0	0
ENSGALG00000016740	OCA2	-5.48718	0.00566322	0	0
ENSGALG00000012522	pvalb1	-5.46944	9.78594e-05	0.018932	0.0212766
ENSGALG00000005577	SEZ6L	-5.41883	0.00466607	0	0
ENSGALG00000001862	ST6GALNAC1	-5.3878	0.0157871	0.00320698	0.0212766
ENSGALG00000008560	MLC1	-5.37632	0.0129089	0	0
ENSGALG00000006572	TNNT3	-5.37389	0.00856523	0	0
ENSGALG00000002556	NGF	-5.35409	0.00401869	0.00541555	0.0212766
ENSGALG00000002643	SELP	-5.34422	0.00969068	0.00426894	0.0212766
ENSGALG00000004502	KIF19	-5.33464	0.0276016	0.00467988	0.0212766
ENSGALG00000014235	WNT7B	-5.32891	0.0183886	0.00121813	0.0212766
ENSGALG00000007772	CBLN4	-5.27816	0.0252205	0.0564828	0.0212766
ENSGALG00000016821	TMEM255B	-5.27642	0.006569	0.0112514	0.0212766
ENSGALG00000005918	FAM69A	-5.26934	0.00459628	0.00488573	0.0212766
ENSGALG00000012286	AMPH	-5.20655	0.00296025	0	0
ENSGALG00000010224	GLIPR1L	-5.19047	0.0168966	0.0106452	0.0425532
ENSGALG00000000548	MATN1	-5.15455	0.00331841	0	0
ENSGALG00000010156	DOCK8	-5.11248	0.0144165	0.000761671	0.0212766
ENSGALG00000026263	RGS8	-5.10405	0.0214358	0.0014978	0.0212766
ENSGALG00000022702	CHRNA10	-5.05328	0.0217217	0	0
ENSGALG00000015980		-5.04711	0.0111001	0.000990495	0.0212766
ENSGALG00000003406	RXRG	-5.04636	8.97524e-13	1.4535	0.468085
ENSGALG00000027002		-5.04321	1.36586e-05	0.208372	0.319149
ENSGALG00000002252		-5.02641	0.0122573	0	0
ENSGALG00000000557	ETNK2	-5.02514	0.00118	0	0
ENSGALG00000000616	ELF3	-5.01616	0.012797	0	0
ENSGALG00000015115	MAMDC2	-5.00638	0.0172933	0	0
ENSGALG00000009523	CNTN1	-5.00574	0.0297154	0.00229047	0.0212766
ENSGALG00000008998	FAM179A	-4.99382	0.0104556	0	0
ENSGALG00000003310	SLC45A2	-4.97344	0.0036754	0.00228002	0.0425532
ENSGALG00000000769	RAB7B	-4.97118	0.00429911	0	0
ENSGALG00000005460	SLCO4A1	-4.96927	0.0482215	0.00695081	0.0425532
ENSGALG00000006126	COL6A2	-4.94593	0.0375531	0.00461965	0.0638298
ENSGALG00000014829	RSPO3	-4.84381	0.0179932	0.0554034	0.0638298
ENSGALG00000015293	TMEM45A	-4.83613	0.00922795	0	0
ENSGALG00000016805	SULT1C	-4.82363	0.0176747	0	0
ENSGALG00000023953		-4.81392	0.0155419	0	0
ENSGALG00000009573	ANXA10	-4.80488	0.0018956	0	0
ENSGALG00000015189	REEP6	-4.79892	2.91617e-09	0.178108	0.0425532
ENSGALG00000027146	GPR139	-4.77814	0.0122398	0.00523796	0.0425532
ENSGALG00000003470	ZMAT4	-4.77323	0.00113806	0	0
ENSGALG00000010408	OPN4-1	-4.7721	0.0445066	0.00518055	0.0212766
ENSGALG00000014994		-4.75398	0.018885	0	0
ENSGALG00000014699	MEGF10	-4.71999	0.0431784	0.00756459	0.0212766
ENSGALG00000025886	SUSD3	-4.70617	0.0106043	0.00235977	0.0212766
ENSGALG00000014561	PTPN6	-4.68544	0.019465	0	0
ENSGALG00000000949	HBEGF	-4.68501	0.000799684	0.00693838	0.0212766
ENSGALG00000028207	ZBBX	-4.66308	0.0208218	0	0
ENSGALG00000002647	PLS1	-4.65888	0.0119548	0	0
ENSGALG00000010980	STK31	-4.64698	0.0256813	0.00284787	0.0212766
ENSGALG00000012639	MTERF2	-4.63964	0.0039302	0	0
ENSGALG00000008061		-4.63923	0.0212393	0.00482863	0.0212766
ENSGALG00000023195	DLX6	-4.63166	0.00396737	0.0786388	0.0425532
ENSGALG00000005958	TRIM66	-4.6063	0.00904645	0	0
ENSGALG00000010071	MAB21L2	-4.57423	1.44308e-05	0.134782	0.12766
ENSGALG00000020292	GABRE	-4.57368	0.039749	0.00242101	0.0212766
ENSGALG00000003049	SIAT8C	-4.57128	0.00479813	0.0139157	0.0425532
ENSGALG00000006361	NEU4	-4.57125	0.00205637	0.0992392	0.0425532
ENSGALG00000005634	CRYBA4	-4.55319	0.00718955	0	0
ENSGALG00000003105	ANKFN1	-4.55303	0.0142675	0	0
ENSGALG00000003424	LMX1A	-4.53878	0.000211802	0.296927	0.0851064
ENSGALG00000004157	PLIN5	-4.53286	0.0263309	0.0290522	0.0212766
ENSGALG00000015982		-4.52561	0.0087008	0	0
ENSGALG00000024487	C8orf22	-4.52532	0.0300908	0.00344637	0.0212766
ENSGALG00000009596	TMEM117	-4.52471	0.0148597	0	0
ENSGALG00000011450		-4.5171	0.00901036	0	0
ENSGALG00000021512		-4.5117	0.00103199	0	0
ENSGALG00000005293	GNG13	-4.50895	0.0228751	0.0733829	0.0851064
ENSGALG00000016680	TFAP2B	-4.49219	1.31706e-11	6.36181	0.680851
ENSGALG00000026017	Drg11	-4.48828	0.0252448	0	0
ENSGALG00000012775	TFAP2A	-4.47423	7.72433e-16	0.894022	0.234043
ENSGALG00000027167		-4.46522	0.000215044	0	0
ENSGALG00000007530		-4.46145	0.0265903	0	0
ENSGALG00000016912	EDNRB	-4.45265	9.55149e-06	0.43877	0.234043
ENSGALG00000023359	BTBD17	-4.44966	0.0166396	0.120085	0.0425532
ENSGALG00000006346	JSC	-4.42037	3.05119e-08	7.40666	0.893617
ENSGALG00000001740	MGAT5B	-4.41118	0.00104693	0	0
ENSGALG00000002005		-4.40914	1.57746e-05	0.336209	0.106383
ENSGALG00000015583	cFuc-TIX	-4.40779	0.0116232	0	0
ENSGALG00000012457	SS3R	-4.38546	0.0272264	0	0
ENSGALG00000012886	MARVELD3	-4.38513	0.0191964	0	0
ENSGALG00000008449		-4.38189	0.0301846	0	0
ENSGALG00000016153	PSCA	-4.34759	0.0120507	0	0
ENSGALG00000006676	RLBP1	-4.33428	0.000146213	0.310052	0.106383
ENSGALG00000026939		-4.2613	0.0256855	0	0
ENSGALG00000016384	MYT1L	-4.24219	0.0080215	0	0
ENSGALG00000026817		-4.24167	0.0171885	0.00520334	0.0212766
ENSGALG00000015573	FHL5	-4.23368	0.0333598	0.0268548	0.0851064
ENSGALG00000007727		-4.23303	0.019081	0	0
ENSGALG00000004631	DRAXIN	-4.22684	1.13834e-05	2.64484	0.446809
ENSGALG00000012538	NR4A2	-4.22275	0.0125616	0.00454163	0.0425532
ENSGALG00000011616	NPFFR2	-4.21855	0.0248753	0	0
ENSGALG00000010521	COL25A1	-4.18968	5.5856e-06	0.543082	0.191489
ENSGALG00000010841	C1orf168	-4.18931	0.0190342	0	0
ENSGALG00000000607	GPR37L1	-4.15512	0.0383787	0.0301347	0.0212766
ENSGALG00000006551	tyrosine	-4.14938	0.0296583	0	0
ENSGALG00000005152	TRPV4	-4.14355	0.0180542	0	0
ENSGALG00000027934	FAM19A1	-4.13849	0.0255254	0	0
ENSGALG00000015575	HTRA3	-4.13593	0.0306853	0.00321423	0.0212766
ENSGALG00000015176	GNA14	-4.13576	0.0137942	0.0817812	0.0212766
ENSGALG00000013862	OLIG3	-4.12275	0.0260048	0	0
ENSGALG00000008905	HABP2	-4.11867	0.023971	0	0
ENSGALG00000002191	TLX2	-4.11431	0.0214913	0	0
ENSGALG00000000112	PLP1	-4.10766	0.00755743	0.00784753	0.0212766
ENSGALG00000010456		-4.09806	0.0345589	0.00451258	0.0212766
ENSGALG00000021589	RTN4RL1	-4.09079	0.0206825	0	0
ENSGALG00000027247	EOMES	-4.09061	0.0241629	0	0
ENSGALG00000011195	WDR27	-4.08881	0.0405955	0.0314166	0.0212766
ENSGALG00000001698	GABRA1	-4.0821	0.0320483	0.0510026	0.0638298
ENSGALG00000006644	ACSL6	-4.07987	1.45052e-07	0.988149	0.319149
ENSGALG00000017056	DCLK1	-4.07747	0.0242651	0.00685685	0.0425532
ENSGALG00000009489	FSTL5	-4.06437	0.0258166	0	0
ENSGALG00000016900	GPC6	-4.06408	0.00108364	0.0818249	0.0851064
ENSGALG00000007511	ITGB2	-4.06331	0.0394493	0	0
ENSGALG00000028415	HES6	-4.06203	0.0131291	0.125851	0.0638298
ENSGALG00000004545	WDR72	-4.06155	0.0260988	0	0
ENSGALG00000011243	DAZL	-4.06126	0.0307114	0	0
ENSGALG00000028657		-4.05826	1.19316e-05	0.0236462	0.0212766
ENSGALG00000014913	ROS1	-4.05524	0.0395987	0	0
ENSGALG00000007945	CRYAB	-4.03563	0.00230493	0.981193	0.0851064
ENSGALG00000004921	SLC6A1	-4.01311	0.0273936	0	0
ENSGALG00000010044	KCNMB4	-4.01289	0.00394766	0.131535	0.0425532
ENSGALG00000006471	SLCO2A1	-4.00124	0.0230745	0	0
ENSGALG00000003619		-3.996	0.0127934	0.00878523	0.0212766
ENSGALG00000011913	2017-09-03	-3.99511	0.0323196	0	0
ENSGALG00000001342	HCN2	-3.9857	0.0123879	0	0
ENSGALG00000023424		-3.98404	0.0361898	0	0
ENSGALG00000010794	MEOX2	-3.98279	0.0253766	0	0
ENSGALG00000002846	NEURL1B	-3.97567	0.00848088	0.0077047	0.0212766
ENSGALG00000012971	CCDC170	-3.97551	0.0333598	0	0
ENSGALG00000025896		-3.97363	0.0459504	0.00107093	0.0212766
ENSGALG00000016426	MAP3K15	-3.96933	0.038391	0	0
ENSGALG00000006297	TRPC7	-3.96684	0.0332027	0	0
ENSGALG00000011120	SLC4A10	-3.96263	0.0368499	0.0459848	0.0638298
ENSGALG00000015685	CFAP99	-3.9487	0.0155419	0.0814266	0.0212766
ENSGALG00000008709	MCOLN3	-3.94202	0.0424549	0	0
ENSGALG00000028222		-3.94016	0.0315281	0	0
ENSGALG00000004966	NYAP2	-3.9384	0.0278235	0	0
ENSGALG00000015608	ADRA2C	-3.92897	0.0175875	0.0156687	0.0638298
ENSGALG00000008840	ACSL5	-3.91396	0.0307705	0	0
ENSGALG00000010391	MMRN1	-3.90489	0.0333598	0	0
ENSGALG00000009478	BCHE	-3.90222	0.00116434	0.373463	0.0638298
ENSGALG00000004116	TRPM8	-3.88658	0.0343886	0	0
ENSGALG00000002319	TEKT2	-3.88635	0.0173498	0	0
ENSGALG00000001705	SLC14A2	-3.8507	0.0399834	0	0
ENSGALG00000004424	SEC16B	-3.8483	0.0270603	0.00328492	0.0212766
ENSGALG00000022137	CRP	-3.83885	0.0105128	0.0112894	0.0212766
ENSGALG00000028085	JAK3	-3.83369	0.0111138	0	0
ENSGALG00000025771	PLCD3	-3.82937	0.0287911	0.0742287	0.0425532
ENSGALG00000023036	FRMPD1	-3.8284	0.0291965	0	0
ENSGALG00000000893	TAT	-3.81807	0.0339879	0	0
ENSGALG00000000382		-3.81424	0.0298412	0	0
ENSGALG00000008037	HORMAD2	-3.80837	0.026999	0	0
ENSGALG00000008430	MAPK8IP1	-3.80479	0.0265903	0.0122419	0.0638298
ENSGALG00000024490	TMEM156	-3.78246	0.0274432	0	0
ENSGALG00000005631	TRPM2	-3.77507	0.0259625	0	0
ENSGALG00000007426	MKX	-3.76844	0.0223761	0	0
ENSGALG00000026584		-3.75608	0.0494098	0	0
ENSGALG00000004331	TUSC5	-3.75422	0.00986753	0	0
ENSGALG00000025992	CDHR4	-3.75381	0.00248096	0.00710055	0.0425532
ENSGALG00000005537	ASB14	-3.74873	0.0234454	0	0
ENSGALG00000014144	CORIN	-3.74292	0.0373552	0	0
ENSGALG00000000479	PADI3	-3.74007	0.0394273	0	0
ENSGALG00000007714	NMUR1	-3.7397	0.0142407	0	0
ENSGALG00000005043	ACACB	-3.73676	0.0355582	0	0
ENSGALG00000011521	FAM198A	-3.72711	7.8409e-05	0.441337	0.0851064
ENSGALG00000027821	APC2	-3.72186	0.0252205	0	0
ENSGALG00000005692	CRISPLD2	-3.71946	0.0283617	0.260708	0.106383
ENSGALG00000005708	HNF4HH13 Lead-like	-3.70746	0.0286842	0	0
ENSGALG00000023420	HOXD3	-3.70483	0.0273497	0	0
ENSGALG00000010711	NXPH1	-3.70274	0.0307114	0	0
ENSGALG00000027818	RDH8	-3.69874	0.0160721	0.0176203	0.0425532
ENSGALG00000012097	AOAH	-3.69579	0.0473668	0	0
ENSGALG00000010139	SS1R	-3.69216	0.0233564	0	0
ENSGALG00000019114	CLDN10	-3.68312	0.0247993	0	0
ENSGALG00000007047	GAL	-3.67812	4.69848e-05	2.41786	0.148936
ENSGALG00000023459	MC1R	-3.65922	0.0200659	0	0
ENSGALG00000016138	DSCAM	-3.64478	0.0399484	0	0
ENSGALG00000003582	SLC1A3	-3.64283	0.000467598	0.734963	0.191489
ENSGALG00000004078		-3.64097	0.037162	0	0
ENSGALG00000001011	CNGB1	-3.63877	0.032158	0.00238101	0.0212766
ENSGALG00000002393	TFAP2E	-3.63606	0.00248574	0.30531	0.106383
ENSGALG00000017342		-3.63419	0.033352	0.00812642	0.0212766
ENSGALG00000013033		-3.6258	0.0310293	0	0
ENSGALG00000007690	TFAP2C	-3.62493	0.0114192	0.655596	0.170213
ENSGALG00000005981	GDF2	-3.61712	0.0402206	0	0
ENSGALG00000005246	PAX3	-3.61451	0.000255948	0.82517	0.255319
ENSGALG00000019663	ACBD7	-3.61128	1.1411e-16	4.21427	0.425532
ENSGALG00000025866		-3.6107	0.00350258	0	0
ENSGALG00000002299	RGR	-3.59812	0.03186	0	0
ENSGALG00000024075	IL10R1	-3.59504	0.0432548	0	0
ENSGALG00000026941	EVA1A	-3.59329	0.0308579	0.0066251	0.0212766
ENSGALG00000016400	RSAD2	-3.57823	0.0470758	0	0
ENSGALG00000020895		-3.57365	0.0372807	0	0
ENSGALG00000000780	SMPD3	-3.5621	1.26279e-07	1.73033	0.510638
ENSGALG00000000115	HEP21	-3.55487	0.0477626	0	0
ENSGALG00000003457	CNP	-3.55353	0.000852573	0.385425	0.106383
ENSGALG00000015522	MYBL1	-3.54903	0.0164087	0	0
ENSGALG00000001605	PPM1J	-3.54	0.0347377	0	0
ENSGALG00000026855		-3.53585	0.0424332	0.00803211	0.0425532
ENSGALG00000023909		-3.53068	0.026265	0	0
ENSGALG00000008834		-3.52335	0.0167487	0	0
ENSGALG00000011684	STAP1	-3.52076	0.0270845	0	0
ENSGALG00000008615	LTK	-3.50934	3.87115e-05	1.12712	0.276596
ENSGALG00000004525	TSPAN10	-3.48707	0.0159754	0	0
ENSGALG00000012297	GRM1	-3.4859	0.0424914	0	0
ENSGALG00000009129	DLX5	-3.48366	7.12713e-10	4.64741	0.446809
ENSGALG00000022234		-3.47106	0.0306059	0	0
ENSGALG00000011708	MYLK	-3.4691	5.45858e-13	2.87328	0.744681
ENSGALG00000010986	GNG4	-3.46366	1.98479e-09	4.77077	0.255319
ENSGALG00000011314	LRRC3B	-3.45649	0.0316492	0	0
ENSGALG00000001560	KCNU1	-3.45153	0.0470251	0	0
ENSGALG00000013362	CABP7	-3.44804	0.00679007	0	0
ENSGALG00000027669	NOL4	-3.44674	0.0437764	0	0
ENSGALG00000011136	CAPN9	-3.44204	0.0377572	0	0
ENSGALG00000010153	CYP21A2	-3.43701	0.00492288	0	0
ENSGALG00000004163	NPHS2	-3.43588	0.0408038	0	0
ENSGALG00000017295	PTHrP	-3.42362	0.0027971	0.843143	0.0851064
ENSGALG00000005413	HS3ST6	-3.42215	0.0306853	0.00392161	0.0212766
ENSGALG00000007417	ARMC4	-3.42144	0.0156783	0.267199	0.106383
ENSGALG00000006106		-3.40133	0.0457451	0	0
ENSGALG00000007740		-3.39749	0.0035626	0.0104432	0.0425532
ENSGALG00000015679	SAMSN1	-3.39349	0.0442354	0	0
ENSGALG00000029131	ASAP3	-3.38597	0.00589847	0	0
ENSGALG00000027107	PROCA1	-3.37579	1.25827e-06	2.15316	0.191489
ENSGALG00000003654	FOXN1	-3.34404	0.0299227	0	0
ENSGALG00000003713		-3.33897	0.0413159	0	0
ENSGALG00000004463	PRSS56	-3.32919	0.0291417	0	0
ENSGALG00000008914	NRAP	-3.32541	0.0354935	0	0
ENSGALG00000010835	DTX4	-3.30995	0.000658961	0.258083	0.0212766
ENSGALG00000009603		-3.30422	0.0157455	0.347759	0.0425532
ENSGALG00000011352	CCDC108	-3.30213	0.0345589	0	0
ENSGALG00000012932	FGD4	-3.28413	0.0418071	0.435383	0.12766
ENSGALG00000027131		-3.27897	0.0377532	0.311816	0.0212766
ENSGALG00000003644		-3.27649	0.0394273	0.34697	0.0851064
ENSGALG00000005256	EPHA4	-3.26683	6.08788e-05	2.00773	0.404255
ENSGALG00000010293	Rd	-3.25858	0.044298	0	0
ENSGALG00000006810		-3.23123	0.015341	0	0
ENSGALG00000025304	gga-mir-1577	-3.19226	0.00142143	0.194982	0.0212766
ENSGALG00000012566	SYN3	-3.19224	0.0350396	0	0
ENSGALG00000020160	ADH6	-3.18062	0.0286815	0	0
ENSGALG00000007785	PROK2	-3.17965	0.044998	0	0
ENSGALG00000014958	ANKDD1B	-3.17824	0.0299419	0	0
ENSGALG00000010180	GLIS3	-3.17437	0.0412333	0	0
ENSGALG00000015558	CPA6	-3.16826	0.0471537	0	0
ENSGALG00000006854	NEURL2	-3.16016	0.0156053	0	0
ENSGALG00000028339	AMIGO3	-3.15909	0.00246708	1.1338	0.425532
ENSGALG00000010160	DMRT1	-3.15869	0.0185984	0	0
ENSGALG00000000690	GDPD4	-3.15784	7.30965e-06	3.9313	0.276596
ENSGALG00000014866	FABP7	-3.15706	3.44245e-17	76.8672	0.978723
ENSGALG00000002075	C16orf89	-3.15039	0.0306059	0.0753309	0.0425532
ENSGALG00000027965	OPRL1	-3.13885	0.0349914	0	0
ENSGALG00000004840	RPH3A	-3.13208	0.0215125	0	0
ENSGALG00000008848	SOX2	-3.1205	0.010929	0.00736335	0.0212766
ENSGALG00000012644	FOXD1	-3.10186	3.27092e-07	0.173389	0.0851064
ENSGALG00000011127		-3.08656	0.0344912	0	0
ENSGALG00000029015	TM6SF2	-3.06985	0.0373889	0	0
ENSGALG00000011544	BCL2L14	-3.05954	0.0356357	0	0
ENSGALG00000027907	NR2F1	-3.05866	1.17003e-10	0.445556	0.276596
ENSGALG00000029070	FAM181A	-3.0555	0.0341236	0	0
ENSGALG00000017393	PKDCC	-3.02534	4.88894e-07	2.80081	0.531915
ENSGALG00000026237		-3.0101	0.000715417	0.298775	0.191489
ENSGALG00000001787	LOXHD1	-3.00853	0.0467767	0	0
ENSGALG00000026361	SLITRK5	-3.00843	0.0218045	0	0
ENSGALG00000005470		-3.00774	0.00334588	0.331467	0.12766
ENSGALG00000015758	PAG1	-3.00264	0.00600074	0.937181	0.12766
ENSGALG00000027252	MPZ	-2.98079	0.00142655	0	0
ENSGALG00000015826	HTR1E	-2.97598	0.0438659	0	0
ENSGALG00000023414	HMX2	-2.93574	0.0413736	0	0
ENSGALG00000010323	BATF	-2.92823	0.0360625	0	0
ENSGALG00000012195		-2.92687	0.0440936	0	0
ENSGALG00000009063		-2.92534	0.0457526	0	0
ENSGALG00000027412		-2.9214	0.0355107	0	0
ENSGALG00000000544	RAB44	-2.91772	0.0449092	0	0
ENSGALG00000001842	PRSS57	-2.91736	0.0202788	0	0
ENSGALG00000001150		-2.91195	0.030303	0	0
ENSGALG00000011222	IL12RB2	-2.90487	0.0371982	0	0
ENSGALG00000024062	RPRML	-2.90431	0.0125553	0	0
ENSGALG00000013598	SCGN	-2.88659	0.0457526	0.0301925	0.148936
ENSGALG00000007701	B3GNT7	-2.87935	0.0207181	1.38956	0.191489
ENSGALG00000021862		-2.87445	0.0466857	0	0
ENSGALG00000013149	MOCOS	-2.873	0.000180856	0.140986	0.106383
ENSGALG00000002960	HMGCS2	-2.86918	0.0498129	0	0
ENSGALG00000011739	ERP27	-2.85774	0.0457962	0	0
ENSGALG00000015820	CA13	-2.8147	0.04238	0	0
ENSGALG00000011859	GBE	-2.79296	0.0168492	0.796926	0.0851064
ENSGALG00000005790		-2.79008	0.0494098	0	0
ENSGALG00000005915	C11orf16	-2.78503	0.0426362	0	0
ENSGALG00000011053	HOXA2	-2.78231	1.28642e-09	3.9039	0.510638
ENSGALG00000028536	MPEG1	-2.77437	0.000107454	0.0312458	0.106383
ENSGALG00000002206	SNX22	-2.76529	0.0275188	0	0
ENSGALG00000023565		-2.7548	0.0275556	0	0
ENSGALG00000014218	PHF21B	-2.75142	0.0128777	0.312131	0.0212766
ENSGALG00000006805		-2.74248	6.30843e-05	3.42276	0.297872
ENSGALG00000012671	PRL	-2.7412	0.0189181	0.0143611	0.0212766
ENSGALG00000012920		-2.70636	0.0250547	0	0
ENSGALG00000026183		-2.69027	0.0181896	0.0460588	0.0425532
ENSGALG00000027562	PURG	-2.67917	0.0316706	0.0547968	0.0425532
ENSGALG00000017059	MAB21L1	-2.67486	0.00820056	0.203421	0.0851064
ENSGALG00000029004		-2.66935	0.000299236	5.28428	0.255319
ENSGALG00000011157	TRIM67	-2.66587	0.0343538	0	0
ENSGALG00000007113	TNC	-2.66372	0.00264868	1.04323	0.361702
ENSGALG00000028431	YJEFN3	-2.65659	0.0470372	0	0
ENSGALG00000003957	APOH	-2.64054	0.00114844	0.429336	0.489362
ENSGALG00000014250	phox2b	-2.63307	0.0434925	0	0
ENSGALG00000007245		-2.62272	0.00825012	0.0620948	0.0212766
ENSGALG00000016616	KAL1	-2.59788	0.0360625	0.737135	0.255319
ENSGALG00000002461	MMP17	-2.58629	2.22277e-05	4.12443	0.489362
ENSGALG00000017178	GRIA4	-2.58619	0.0365205	0	0
ENSGALG00000007917	LAMB4	-2.58572	0.0315281	0.230478	0.148936
ENSGALG00000000379	ITGB3	-2.57551	7.34901e-07	17.3957	0.659574
ENSGALG00000023859	RPP25	-2.57142	0.0341552	0.0104832	0.0212766
ENSGALG00000002911	MOXD1	-2.55913	0.000486956	7.06283	0.404255
ENSGALG00000026173		-2.5504	0.000406924	4.34326	0.361702
ENSGALG00000025516	gga-mir-1753	-2.538	0.0460303	0.165224	0.0425532
ENSGALG00000010822	SPATA4	-2.50452	0.0418071	0	0
ENSGALG00000026719		-2.49479	0.043978	0	0
ENSGALG00000016428	Enpp2	-2.47378	0.000630477	4.01998	0.404255
ENSGALG00000009739	AMIGO2	-2.46355	0.00775208	2.70467	0.297872
ENSGALG00000009546	HTRA1	-2.45677	0.000574745	4.32117	0.382979
ENSGALG00000015013	MSX1	-2.45076	0.00137209	23.4609	0.595745
ENSGALG00000002515	OLFM1	-2.44126	2.30367e-11	13.4666	0.808511
ENSGALG00000016575	GPM6B	-2.4388	6.04446e-06	8.47237	0.425532
ENSGALG00000027373		-2.41296	0.00170065	3.2099	0.361702
ENSGALG00000009928		-2.39485	0.036149	0	0
ENSGALG00000022819	PCP4	-2.37648	0.000625321	13.2678	0.404255
ENSGALG00000028420	SAMD5	-2.32768	0.00755743	0.477806	0.0638298
ENSGALG00000023647	Gbx-1	-2.31041	0.00698416	0.155777	0.106383
ENSGALG00000012554	UPP2	-2.27857	0.0304075	0.159443	0.170213
ENSGALG00000015519		-2.27687	0.000192079	4.53835	0.468085
ENSGALG00000027159	CNKSR3	-2.2756	5.34604e-07	13.265	0.787234
ENSGALG00000019757		-2.25779	0.0452227	1.46765	0.106383
ENSGALG00000027060		-2.25526	0.0429458	0	0
ENSGALG00000005000	COMTD1	-2.23997	9.73503e-09	18.3591	0.978723
ENSGALG00000014930	ENC1	-2.22867	4.64301e-05	9.24519	0.553191
ENSGALG00000011288	DACT2	-2.19864	0.00114844	23.6042	0.702128
ENSGALG00000026556		-2.19055	3.95777e-08	3.75843	0.404255
ENSGALG00000000645	ESPN	-2.15761	0.000192079	0.217077	0.212766
ENSGALG00000026251	SPRY4	-2.1043	0.0323282	0.0649153	0.106383
ENSGALG00000016800	C2orf40	-2.07451	1.78436e-06	10.67	0.808511
ENSGALG00000010827	ITPK1	-2.05867	8.43363e-07	6.82494	0.723404
ENSGALG00000001109	GTSF1	-2.0277	0.00107135	7.22545	0.723404

[truncated: 3 more sheets: DEG_info_Trailblazer_up.txt, DEG_HHSt11_Cluster1_vs_Cluster2, DEG_HHSt11_1_vs_2 WNT.PCP]
