# Supplementary material for: Single-cell transcriptome analysis of avian neural crest migration reveals signatures of invasion and molecular transitions
Source: eLife. 2017 Dec 4;6:e28415. doi: 10.7554/eLife.28415 (PMC5728719; doi:10.7554/eLife.28415)
Supplement: Figure 5—source data 1. — Differentially expressed genes (log2 FC greater than 2 or less than −2 and adjusted p value less than 0.05) used to identify enriched (-log(p-value) greater than 1.3; p value less than 0.05) signaling pathways. [file elife-28415-fig5-data1.xlsx]

## Sheet: List of Tabs
List of Tabs
Signaling pathways enriched in Trailblazers
Signaling pathways enriched in HHSt11 Cluster 1
Signaling pathways enriched in HHSt11 Cluster 2
Signaling pathways enriched in HHSt13 Leaders
Signaling pathways enriched in HHSt13 Trailers
Signaling pathways enriched in HHSt15 Leaders
Signaling pathways enriched in HHSt15 Trailers

## Sheet: Trailblazer pathways
Ingenuity Canonical Pathways	-log(p-value)	Ratio	Molecules
Hepatic Fibrosis / Hepatic Stellate Cell Activation	12	0.197	FN1,MYL2,LHX2,LEPR,COL9A3,COL8A1,COL15A1,FAS,TGFBR2,IL1R2,EDN1,PROK1,TGFB2,COL22A1,MYL3,COL19A1,FLT1,COL6A2,EDNRB,IL1RAPL2,MYH13,COL12A1,FLT4,BAMBI,MMP2,COL20A1,PDGFB,MYL1,COL13A1,COL23A1,IL10RA,COL24A1,COL4A4,KDR,COL25A1,COL3A1
Cardiac Hypertrophy Signaling	6.7	0.136	MAP3K15,CAMK4,MYL2,PIK3R5,GNG13,HAND1,GNA14,MAPK13,KLB,TGFBR2,PLCD3,TGFB2,ADCY8,RHOF,PLCD4,MYL3,GNG4,ADCY2,RHOC,CACNA1C,TLR9,MYL1,GNG10,ADRA1D,NKX2-5,MEF2D,ADRA2C,MAP3K8,ADCY7,GATA4,ADRA1A,HSPB1
Thrombin Signaling	6.05	0.138	GATA5,F2RL2,CAMK4,MYL2,PIK3R5,GNG13,MYLK,GNA14,MAPK13,GATA2,KLB,PLCD3,GATA6,ADCY8,RHOF,PLCD4,MYL3,GNG4,ARHGEF4,ADCY2,PRKCQ,RHOC,TLR9,MYL1,GNG10,PRKCH,ADCY7,GATA4
Calcium Signaling	5.62	0.14	CAMK4,CHRNA6,MYL2,TNNT3,MYH13,TNNC2,TNNC1,TNNT2,RYR2,CHRNA10,TRPC5,GRIA4,NFATC1,MYL1,GRIN3A,TRPC7,ATP2B2,MEF2D,TNNI1,SLC8A1,CHRNA3,RCAN2,ACTC1,ACTA1,MYL3
Axonal Guidance Signaling	5.58	0.102	RAC2,LRRC4C,ADAMTS7,BMP4,MYL2,BDNF,BMP2,PIK3R5,GNG13,EPHA4,GNA14,NGF,ABLIM1,KLB,NFATC1,ADAMTS2,PLCD3,PROK1,WNT7B,MMP11,ABLIM2,RASSF5,PLCD4,ACE,MYL3,WNT5B,GNG4,PRKCQ,STK36,FES,WNT2B,MMP2,EPHA3,TLR9,ROBO3,BMP10,MYL1,PDGFB,GNG10,EPHA6,SEMA4G,PRKCH,SEMA3C,WNT11,WNT1,NRP1
G-Protein Coupled Receptor Signaling	5.29	0.118	ENPP6,CAMK4,HTR4,PDE3A,TBXA2R,LHCGR,PIK3R5,GNA14,KLB,CHRM3,OPRL1,HTR2C,HTR1E,PDE11A,ADCY8,ADCY2,HRH2,APLNR,PDE10A,GRM1,SSTR3,RGS4,IKBKE,TLR9,CRHR1,ADRA1D,RASGRP1,ADRA2C,MAP3K8,MC1R,ADCY7,ADRA1A
IL-8 Signaling	4.83	0.127	GNG4,RAC2,ANGPT2,PRKCQ,FLT1,MYL2,ANGPT1,RHOC,FLT4,PIK3R5,GNG13,HBEGF,MMP2,IKBKE,TLR9,KLB,ITGB3,GNG10,ITGB2,PROK1,NCF2,PRKCH,KDR,RHOF,TEK
Cellular Effects of Sildenafil (Viagra)	4.67	0.146	CACNG1,ADCY2,CAMK4,MYL2,GUCY2C,MYH13,PDE3A,CACNA1C,MYLK,MYL1,PLCD3,ACTG2,ADCY8,PLCD4,ACTC1,ADCY7,ACTA1,MYL3,SLC4A10
Human Embryonic Stem Cell Pluripotency	4.6	0.14	BMP4,BDNF,BMP2,WNT2B,SMAD6,PIK3R5,TLR9,NGF,KLB,BMP10,PDGFB,INHBA,TGFBR2,SOX2,WNT7B,TGFB2,FGFRL1,WNT11,WNT1,WNT5B
Cardiomyocyte Differentiation via BMP Receptors	4.51	0.35	NKX2-5,BMP4,MYL2,BMP2,SMAD6,GATA4,BMP10
Gαq Signaling	4.37	0.131	GNG4,CAMK4,PRKCQ,RHOC,GRM1,PIK3R5,GNG13,RGS4,IKBKE,GNA14,TLR9,KLB,CHRM3,NFATC1,GYS2,GNG10,ADRA1D,HTR2C,PRKCH,RHOF,ADRA1A
Leukocyte Extravasation Signaling	4.36	0.119	RAC2,CLDN11,CTNNA3,PIK3R5,MAPK13,KLB,ITGB3,MMP11,ACTG2,RASSF5,ACTC1,MMP17,ACTA1,CLDN10,PRKCQ,ACTN2,THY1,MMP2,TLR9,ITGB2,CLDN5,CDH5,RASGRP1,NCF2,PRKCH
Role of NFAT in Cardiac Hypertrophy	4.1	0.12	GNG4,ADCY2,CAMK4,PRKCQ,PIK3R5,GNG13,HAND1,MAPK13,TLR9,KLB,GNG10,TGFBR2,NKX2-5,PLCD3,MEF2D,TGFB2,PRKCH,ADCY8,SLC8A1,PLCD4,ADCY7,RCAN2,GATA4
eNOS Signaling	4.09	0.129	ADCY2,CAMK4,PRKCQ,FLT1,FLT4,PIK3R5,AQP1,AQP8,CHRNA10,AQP4,TLR9,KLB,CNGB1,PROK1,PRKCH,KDR,ADCY8,CHRNA3,ADCY7,ESR2
ILK Signaling	3.96	0.117	FN1,MYL2,RHOC,MYH13,BMP2,ACTN2,PIK3R5,TLR9,KLB,MYL1,ITGB3,ITGB2,PROK1,PPM1J,SH2B2,PPP2R2B,PPP2R2C,ACTG2,RHOF,ACTC1,DSP,ACTA1,MYL3
Transcriptional Regulatory Network in Embryonic Stem Cells	3.94	0.225	SOX2,RFX4,ISL1,GATA6,PAX6,HAND1,MYF5,EOMES,GATA4
Protein Kinase A Signaling	3.88	0.0944	ENPP6,CAMK4,MYL2,PDE3A,MYLK2,GNG13,MYLK,NFATC1,PHKA2,TGFBR2,PLCD3,DUSP26,TGFB2,PTPRZ1,PDE11A,ADCY8,PLCD4,MYL3,GNG4,PLN,PTPN6,ADCY2,PRKCQ,PPP1R1B,PDE10A,RYR2,TTN,MYL1,GYS2,GNG10,CNGB1,PTPRU,PRKCH,TNNI1,ADCY7,PTPRR,DUSP16
Serotonin Receptor Signaling	3.68	0.209	HTR2C,ADCY2,HTR4,DDC,HTR1E,SLC18A2,ADCY8,ADCY7,MAOA
Tight Junction Signaling	3.64	0.12	CLDN10,CLDN11,F2RL2,MYL2,MYH13,MYLK,IGSF5,CNKSR3,SNAP25,MYL1,TGFBR2,CLDN5,PPM1J,PPP2R2B,TGFB2,PPP2R2C,ACTG2,ACTC1,ACTA1,MYL3
Leptin Signaling in Obesity	3.58	0.153	NPY,SOCS3,ADCY2,LEPR,PDE3A,PIK3R5,TLR9,KLB,PLCD3,AGRP,ADCY8,PLCD4,ADCY7
α-Adrenergic Signaling	3.48	0.149	GNG4,ADCY2,PRKCQ,CAMK4,GNG13,PRKCH,SLC8A1,ADCY8,ADCY7,ADRA1A,PHKA2,GYS2,GNG10
RhoGDI Signaling	3.44	0.116	GNG4,ARHGEF4,MYL2,RHOC,ARHGDIG,GNG13,ARHGEF17,GNA14,MYL1,GNG10,CDH7,CDH5,CDH10,CDH8,ACTG2,RHOF,ACTC1,ESR2,ACTA1,MYL3
Cardiac β-adrenergic Signaling	3.37	0.124	GNG4,ENPP6,PLN,ADCY2,PDE10A,PDE3A,RYR2,GNG13,CACNA1C,GNG10,PPM1J,PPP2R2B,PPP2R2C,ADCY8,PDE11A,SLC8A1,ADCY7
Melanocyte Development and Pigmentation Signaling	3.1	0.137	ADCY2,PTPN6,SOX10,PIK3R5,TLR9,KLB,KITLG,PAX3,SH2B2,RPS6KB2,MC1R,ADCY8,ADCY7
GPCR-Mediated Nutrient Sensing in Enteroendocrine Cells	3.03	0.141	GNG4,PLCD3,CASR,ADCY2,PRKCQ,GNG13,PRKCH,GNA14,ADCY8,PLCD4,ADCY7,GNG10
Gαs Signaling	3.02	0.128	GNG4,ADCY2,HRH2,CNGB1,HTR4,RYR2,LHCGR,GNG13,MC1R,CRHR1,ADCY8,CHRM3,ADCY7,GNG10
Embryonic Stem Cell Differentiation into Cardiac Lineages	3.01	0.4	SOX2,NKX2-5,ISL1,GATA4
Role of NANOG in Mammalian Embryonic Stem Cell Pluripotency	3	0.123	BMP4,BMP2,WNT2B,PIK3R5,TLR9,KLB,BMP10,SOX2,WNT7B,GATA6,JAK3,WNT11,WNT1,GATA4,WNT5B
Agranulocyte Adhesion and Diapedesis	2.95	0.106	CLDN10,CLDN11,FN1,MYL2,MYH13,MMP2,MYL1,ITGB2,CLDN5,CDH5,SELP,CXCL14,MMP11,ACTG2,ACTC1,CD34,CX3CL1,MMP17,MYL3,ACTA1
TGF-β Signaling	2.94	0.138	TGFBR2,NKX2-5,GSC,BMP4,BMP2,SMAD6,TGFB2,MAPK13,PITX2,TLX2,INHBA,INHBB
RAR Activation	2.92	0.105	ADCY2,PRKCQ,RDH10,BMP2,CYP26A1,SMAD6,MAPK13,RDH8,SMARCA4,CRABP1,NR2F1,RXRG,KAT2B,ALDH1A2,TGFB2,PRKCH,ADCY8,ADCY7,PPARGC1A,RBP4
Signaling by Rho Family GTPases	2.9	0.0972	GNG4,ARHGEF4,MYL2,RHOC,PIK3R5,GNG13,MYLK,ARHGEF17,GNA14,TLR9,KLB,DES,MYL1,GNG10,CDH7,CDH5,CDH10,NCF2,CDH8,ACTG2,RHOF,ACTC1,ACTA1,MYL3
Nitric Oxide Signaling in the Cardiovascular System	2.87	0.124	PLN,PRKCQ,CAMK4,FLT1,GUCY2C,PROK1,RYR2,FLT4,PIK3R5,CACNA1C,PRKCH,TLR9,KDR,KLB
Dopamine Receptor Signaling	2.86	0.143	ADCY2,PRL,PPP1R1B,DDC,PPM1J,PPP2R2B,PPP2R2C,SLC18A2,ADCY8,ADCY7,MAOA
Production of Nitric Oxide and Reactive Oxygen Species in Macrophages	2.84	0.104	PPARA,MAP3K15,PTPN6,PRKCQ,RHOC,PIK3R5,IKBKE,MAPK13,TLR9,KLB,APOA1,PPM1J,NCF2,PPP2R2B,PRKCH,MAP3K8,PPP2R2C,JAK3,RHOF,RBP4
cAMP-mediated signaling	2.79	0.0987	ENPP6,HRH2,ADCY2,APLNR,CAMK4,HTR4,PDE10A,PDE3A,SSTR3,TBXA2R,LHCGR,RGS4,CRHR1,CHRM3,OPRL1,CNGB1,HTR1E,ADRA2C,MC1R,ADCY8,PDE11A,ADCY7
B Cell Receptor Signaling	2.68	0.103	MAP3K15,RAC2,PTPN6,CAMK4,PRKCQ,PIK3R5,IKBKE,MAPK13,TLR9,KLB,NFATC1,SYNJ2,CARD10,PAG1,SYK,RPS6KB2,MAP3K8,PIK3AP1,RASSF5
P2Y Purigenic Receptor Signaling Pathway	2.65	0.114	GNG4,ADCY2,PRKCQ,P2RY11,PIK3R5,GNG13,TLR9,KLB,GNG10,ITGB3,PLCD3,PRKCH,ADCY8,PLCD4,ADCY7
Dopamine-DARPP32 Feedback in cAMP Signaling	2.56	0.105	ADCY2,PRKCQ,CAMK4,KCNJ2,PPP1R1B,KCNJ16,CACNA1C,KCNJ3,GRIN3A,PLCD3,PPM1J,PPP2R2B,PRKCH,PPP2R2C,ADCY8,PLCD4,ADCY7
Basal Cell Carcinoma Signaling	2.56	0.139	BMP4,STK36,APC2,BMP2,WNT7B,WNT2B,WNT11,WNT5B,WNT1,BMP10
Colorectal Cancer Metastasis Signaling	2.56	0.0931	GNG4,ADCY2,RHOC,WNT2B,PIK3R5,GNG13,MMP2,TLR9,KLB,GNG10,TGFBR2,PROK1,WNT7B,TGFB2,MMP11,JAK3,ADCY8,RHOF,ADCY7,WNT11,WNT1,MMP17,WNT5B
CXCR4 Signaling	2.47	0.103	GNG4,ADCY2,PRKCQ,MYL2,RHOC,PIK3R5,GNG13,GNA14,TLR9,KLB,MYL1,GNG10,PRKCH,ADCY8,RHOF,ADCY7,MYL3
Neuropathic Pain Signaling In Dorsal Horn Neurons	2.38	0.114	PLCD3,PRKCQ,CAMK4,GRM1,BDNF,PIK3R5,TAC1,PRKCH,TLR9,PLCD4,KLB,GRIA4,GRIN3A
CREB Signaling in Neurons	2.34	0.0978	GNG4,ADCY2,CAMK4,PRKCQ,GRM1,GRIK3,PIK3R5,GNG13,GNA14,TLR9,KLB,GRIA4,GNG10,PLCD3,PRKCH,ADCY8,PLCD4,ADCY7
Actin Cytoskeleton Signaling	2.33	0.0921	RAC2,ARHGEF4,FN1,MYL2,MYH13,FGF9,ACTN2,MYLK2,PIK3R5,MYLK,TLR9,KLB,TTN,MYL1,PDGFB,FGF13,APC2,ACTG2,ACTC1,ACTA1,MYL3
VEGF Signaling	2.31	0.117	PTPN6,FLT1,PROK1,ACTN2,FLT4,PIK3R5,ACTG2,TLR9,KDR,KLB,ACTC1,ACTA1
Gα12/13 Signaling	2.3	0.108	F2RL2,MYL2,TBXA2R,PIK3R5,IKBKE,TLR9,KLB,MYL1,CDH7,CDH5,MEF2D,CDH10,CDH8,MYL3
GABA Receptor Signaling	2.26	0.134	GABRG3,GAD2,ADCY2,SLC6A1,GABRB1,GABRA1,ADCY8,ADCY7,GABRE
Germ Cell-Sertoli Cell Junction Signaling	2.26	0.0983	MAP3K15,RAC2,RHOC,ACTN2,PIK3R5,LAMC3,TLR9,KLB,PLS1,TGFBR2,SORBS1,TGFB2,MAP3K8,ACTG2,RHOF,ACTC1,ACTA1
Role of Osteoblasts, Osteoclasts and Chondrocytes in Rheumatoid Arthritis	2.25	0.0905	CAMK4,BMP4,IL1RAPL2,BMP2,DLX5,WNT2B,SMAD6,PIK3R5,IKBKE,TLR9,KLB,NFATC1,BMP10,ITGB3,IL18R1,IL1R2,APC2,WNT7B,WNT11,WNT1,WNT5B
Factors Promoting Cardiogenesis in Vertebrates	2.25	0.12	TGFBR2,NKX2-5,PRKCQ,BMP4,MYL2,BMP2,TGFB2,PRKCH,WNT11,GATA4,BMP10
Synaptic Long Term Depression	2.23	0.103	PRKCQ,GUCY2C,ABHD3,GRM1,RYR2,GNA14,CRHR1,GRIA4,PLCD3,PLB1,PPM1J,PPP2R2B,PRKCH,PPP2R2C,PLCD4
Molecular Mechanisms of Cancer	2.19	0.0802	RAC2,BMP4,BMP2,PIK3R5,GNA14,MAPK13,KLB,FAS,TGFBR2,WNT7B,TGFB2,ADCY8,RHOF,WNT5B,ADCY2,ARHGEF4,STK36,PRKCQ,RHOC,WNT2B,SMAD6,ARHGEF17,TLR9,BMP10,RASGRP1,PRKCH,JAK3,ADCY7,WNT1,WNT11
Gαi Signaling	2.19	0.108	GNG4,ADCY2,APLNR,TBXA2R,SSTR3,RGS4,GNG13,OPRL1,GNG10,HTR1E,ADRA2C,ADCY8,ADCY7
Granulocyte Adhesion and Diapedesis	2.17	0.096	CLDN10,CLDN11,HRH2,IL1RAPL2,THY1,MMP2,ITGB3,IL1R2,ITGB2,CLDN5,CDH5,SELP,CXCL14,MMP11,CX3CL1,MMP17,HSPB1
NF-κB Signaling	2.1	0.0944	SIGIRR,BMP4,PRKCQ,FLT1,BMP2,FLT4,PIK3R5,TLR9,NGF,KLB,TGFBR2,IL1R2,CARD10,CARD11,MAP3K8,FGFRL1,KDR
Relaxin Signaling	2.08	0.0987	ENPP6,GNG4,ADCY2,GUCY2C,PDE10A,PDE3A,PIK3R5,GNG13,GNA14,TLR9,KLB,GNG10,ADCY8,PDE11A,ADCY7
Tec Kinase Signaling	1.99	0.0941	GNG4,PRKCQ,RHOC,PIK3R5,GNG13,GNA14,TLR9,KLB,FAS,GNG10,PRKCH,ACTG2,JAK3,RHOF,ACTC1,ACTA1
Notch Signaling	1.99	0.158	DLL1,CNTN1,HES5,DTX4,MAML3,DLL4
Pregnenolone Biosynthesis	1.95	0.3	CYP11A1,MICAL2,CYP26A1
Endothelin-1 Signaling	1.94	0.0909	ADCY2,PRKCQ,EDNRB,GUCY2C,ABHD3,PIK3R5,MAPK13,GNA14,TLR9,KLB,PLCD3,EDN1,PLB1,PRKCH,ADCY8,PLCD4,ADCY7
Antiproliferative Role of Somatostatin Receptor 2	1.94	0.12	GNG4,PTPN6,SSTR2,GUCY2C,PIK3R5,GNG13,TLR9,KLB,GNG10
Breast Cancer Regulation by Stathmin1	1.92	0.0887	GNG4,ARHGEF4,ADCY2,CAMK4,PRKCQ,PIK3R5,GNG13,ARHGEF17,TRPC5,TLR9,KLB,GNG10,PPM1J,PPP2R2B,PRKCH,PPP2R2C,ADCY8,ADCY7
PCP pathway	1.92	0.127	RSPO3,WNT7B,WNT2B,CTHRC1,WNT11,WNT5B,WNT1,HSPB1
Ovarian Cancer Signaling	1.92	0.0972	FGF9,WNT2B,LHCGR,PIK3R5,MMP2,TLR9,KLB,EDN1,PROK1,WNT7B,RPS6KB2,WNT1,WNT5B,WNT11
Virus Entry via Endocytic Pathways	1.92	0.108	RAC2,ITGB2,PRKCQ,PIK3R5,PRKCH,ACTG2,TLR9,KLB,ACTC1,ACTA1,ITGB3
BMP signaling pathway	1.91	0.118	NKX2-5,BMP4,CAMK4,BMP2,SMAD6,MAPK13,PITX2,TLX2,BMP10
IL-4 Signaling	1.91	0.112	SYNJ2,PTPN6,IRF4,IL13RA1,PIK3R5,RPS6KB2,JAK3,TLR9,KLB,NFATC1
AMPK Signaling	1.9	0.0899	ACACB,PIK3R5,MAPK13,CHRNA10,TLR9,KLB,SMARCA4,GYS2,ADRA1D,KAT2B,PPM1J,PPP2R2B,ADRA2C,PPP2R2C,CHRNA3,ADRA1A,PPARGC1A
Integrin Signaling	1.9	0.0868	RAC2,CAPN6,MYL2,RHOC,ACTN2,MYLK2,PIK3R5,MYLK,TLR9,KLB,TTN,PDGFB,ITGB3,ITGB2,CAPN9,ACTG2,RHOF,ACTC1,ACTA1
Regulation of Actin-based Motility by Rho	1.85	0.11	RAC2,MYL2,RHOC,MYLK,ACTG2,RHOF,ACTC1,ACTA1,MYL3,MYL1
Mechanisms of Viral Exit from Host Cells	1.83	0.146	PRKCQ,SH3GL3,PRKCH,ACTG2,ACTC1,ACTA1
PPARα/RXRα Activation	1.81	0.0899	PPARA,ADCY2,IL1RAPL2,IKBKE,GNA14,ABCA1,TGFBR2,NR2F1,IL1R2,PLCD3,APOA1,TGFB2,ADCY8,PLCD4,ADCY7,PPARGC1A
Th1 Pathway	1.79	0.0963	SOCS3,ITGB2,DLL1,PRKCQ,PIK3R5,IL10RA,IL12RB2,JAK3,TLR9,KLB,DLL4,NFATC1,IL18R1
Phagosome Formation	1.75	0.0984	PLCD3,PRKCQ,FN1,MBL2,RHOC,SYK,PIK3R5,PRKCH,TLR9,RHOF,PLCD4,KLB
Macropinocytosis Signaling	1.74	0.111	ITGB2,PRKCQ,PIK3R5,PRKCH,TLR9,NGF,KLB,PDGFB,ITGB3
Sphingosine-1-phosphate Signaling	1.73	0.0976	PLCD3,ADCY2,RHOC,PIK3R5,TLR9,RHOF,ADCY8,PLCD4,KLB,ADCY7,SMPD3,PDGFB
Clathrin-mediated Endocytosis Signaling	1.73	0.0863	FGF9,SH3GL3,PIK3R5,TLR9,KLB,PDGFB,ITGB3,FGF13,ITGB2,APOA1,PROK1,AMPH,DAB2,ACTG2,ACTC1,ACTA1,RBP4
Gap Junction Signaling	1.71	0.0893	ADCY2,PRKCQ,GUCY2C,PIK3R5,TLR9,KLB,PLCD3,HTR2C,PRKCH,ACTG2,ADCY8,PLCD4,ACTC1,ADCY7,ACTA1
Agrin Interactions at Neuromuscular Junction	1.7	0.116	NRG1,RAC2,ITGB2,RAPSN,ACTG2,ACTC1,ACTA1,ITGB3
CCR5 Signaling in Macrophages	1.7	0.116	GNG4,PRKCQ,CAMK4,GNG13,PRKCH,MAPK13,FAS,GNG10
Wnt/β-catenin Signaling	1.69	0.0888	SOX10,WNT2B,TGFBR2,SOX2,CDH5,APC2,PPM1J,WNT7B,PPP2R2B,TGFB2,PPP2R2C,SOX18,WNT11,WNT1,WNT5B
Amyotrophic Lateral Sclerosis Signaling	1.67	0.0991	CAPN6,PROK1,GRIK3,PIK3R5,SLC1A2,CACNA1C,CAPN9,TLR9,KLB,GRIA4,GRIN3A
Corticotropin Releasing Hormone Signaling	1.67	0.0991	ADCY2,PRKCQ,CAMK4,GUCY2C,BDNF,MEF2D,PRKCH,MAPK13,CRHR1,ADCY8,ADCY7
Glioma Invasiveness Signaling	1.66	0.114	RHOC,PIK3R5,MMP2,PLAU,TLR9,RHOF,KLB,ITGB3
Glutamate Receptor Signaling	1.66	0.123	CAMK4,GRM1,GRIK3,SLC1A3,SLC1A2,GRIA4,GRIN3A
PEDF Signaling	1.64	0.107	ARHGAP22,BDNF,PIK3R5,IKBKE,MAPK13,TLR9,NGF,KLB,FAS
Role of JAK1 and JAK3 in γc Cytokine Signaling	1.63	0.113	SOCS3,FES,SYK,SH2B2,PIK3R5,JAK3,TLR9,KLB
Histidine Degradation VI	1.62	0.231	CYP11A1,MICAL2,CYP26A1
CDK5 Signaling	1.61	0.101	ADCY2,PPP1R1B,BDNF,PPM1J,PPP2R2B,PPP2R2C,MAPK13,NGF,ADCY8,ADCY7
GPCR-Mediated Integration of Enteroendocrine Signaling Exemplified by an L Cell	1.6	0.111	PLCD3,ADCY2,GAL,GNA14,VIP,ADCY8,PLCD4,ADCY7
MSP-RON Signaling Pathway	1.59	0.119	ITGB2,PIK3R5,ACTG2,TLR9,KLB,ACTC1,ACTA1
Regulation of the Epithelial-Mesenchymal Transition Pathway	1.59	0.0847	FGF9,WNT2B,PIK3R5,MMP2,TLR9,KLB,FGF13,TGFBR2,GSC,WNT7B,TGFB2,FGFRL1,JAK3,WNT1,WNT5B,WNT11
Phospholipase C Signaling	1.58	0.0802	GNG4,ARHGEF4,ADCY2,CAMK4,PRKCQ,MYL2,RHOC,GNG13,ARHGEF17,NFATC1,MYL1,GNG10,MEF2D,SYK,PRKCH,ADCY8,RHOF,ADCY7,MYL3
Coagulation System	1.56	0.143	F8,PROC,PLAU,TFPI,SERPINF2
PAK Signaling	1.56	0.099	MYL2,PIK3R5,MYLK,DSCAM,EPHA3,TLR9,KLB,MYL3,PDGFB,MYL1
nNOS Signaling in Neurons	1.56	0.128	CAPN6,PRKCQ,CAMK4,PRKCH,CAPN9,GRIN3A
LPS/IL-1 Mediated Inhibition of RXR Function	1.56	0.0811	PPARA,SULT1C2,IL1RAPL2,ACSL6,HMGCS2,GSTT1,ABCA1,SOD3,IL1R2,SULT1E1,CYP3A4,ACSL5,HS3ST2,ALDH1A2,FABP7,HS3ST6,PPARGC1A,MAOA
STAT3 Pathway	1.56	0.11	TGFBR2,SOCS3,PTPN6,FLT1,FLT4,MAPK13,FGFRL1,KDR
Xenobiotic Metabolism Signaling	1.55	0.0767	MAP3K15,CAMK4,PRKCQ,SULT1C2,PIK3R5,MAPK13,TLR9,KLB,GSTT1,SOD3,SULT1E1,CYP3A4,PPM1J,HS3ST2,ALDH1A2,PPP2R2B,PRKCH,MAP3K8,PPP2R2C,HS3ST6,PPARGC1A,MAOA
Epithelial Adherens Junction Signaling	1.54	0.089	TGFBR2,DLL1,MYL2,LMO7,SORBS1,MYH13,ACTN2,TGFB2,ACTG2,ACTC1,ACTA1,MYL3,MYL1
p70S6K Signaling	1.54	0.0916	PLCD3,F2RL2,PRKCQ,SYK,PPM1J,PPP2R2B,PIK3R5,PRKCH,PPP2R2C,TLR9,PLCD4,KLB
G Beta Gamma Signaling	1.53	0.102	GNG4,ADCY2,PRKCQ,GNG13,HBEGF,PRKCH,KCNJ3,GNA14,GNG10
HER-2 Signaling in Breast Cancer	1.53	0.102	NRG1,ITGB2,PRKCQ,PIK3R5,PRKCH,MMP2,TLR9,KLB,ITGB3
VEGF Family Ligand-Receptor Interactions	1.53	0.102	PRKCQ,FLT1,FLT4,PIK3R5,PRKCH,TLR9,KDR,KLB,NRP1
Dermatan Sulfate Biosynthesis	1.52	0.115	SULT1E1,SULT1C2,XYLT1,HS3ST2,HS3ST6,DSEL,B3GAT2
p38 MAPK Signaling	1.52	0.094	TGFBR2,IL1R2,TIFA,IL1RAPL2,MEF2D,TGFB2,RPS6KB2,HSPB7,MAPK13,FAS,HSPB1
Role of Macrophages, Fibroblasts and Endothelial Cells in Rheumatoid Arthritis	1.47	0.0744	SOCS3,FN1,CAMK4,PRKCQ,IL1RAPL2,WNT2B,PIK3R5,IKBKE,TLR9,KLB,NFATC1,PDGFB,IL18R1,IL1R2,PLCD3,PROK1,APC2,WNT7B,PRKCH,PLCD4,WNT11,WNT1,WNT5B
PTEN Signaling	1.47	0.0924	TGFBR2,SYNJ2,RAC2,FLT1,FLT4,PIK3R5,RPS6KB2,IKBKE,FGFRL1,KDR,CNKSR3
IL-1 Signaling	1.45	0.0989	GNG4,ADCY2,GNG13,IKBKE,GNA14,MAPK13,ADCY8,ADCY7,GNG10
Renin-Angiotensin Signaling	1.45	0.0917	PTPN6,ADCY2,PRKCQ,PIK3R5,PRKCH,MAPK13,TLR9,ADCY8,KLB,ADCY7,ACE
Synaptic Long Term Potentiation	1.45	0.0917	PLCD3,PRKCQ,CAMK4,GRM1,CACNA1C,PRKCH,GNA14,ADCY8,PLCD4,GRIA4,GRIN3A
nNOS Signaling in Skeletal Muscle Cells	1.45	0.2	CAMK4,SNTB1,RYR2
Angiopoietin Signaling	1.44	0.104	ANGPT2,ANGPT1,PIK3R5,IKBKE,TLR9,KLB,TEK,TIE1
fMLP Signaling in Neutrophils	1.43	0.0909	GNG4,PRKCQ,CAMK4,NCF2,PIK3R5,GNG13,PRKCH,TLR9,KLB,NFATC1,GNG10
Acute Phase Response Signaling	1.39	0.0828	SOCS3,HPX,FN1,APOH,IKBKE,MAPK13,SERPINF2,CRABP1,MBL2,APOA1,F8,CRP,HRG,RBP4
Netrin Signaling	1.38	0.128	RAC2,RYR2,ABLIM2,ABLIM1,NFATC1
Role of NFAT in Regulation of the Immune Response	1.38	0.0811	GNG4,CAMK4,PRKCQ,PIK3R5,GNG13,IKBKE,GNA14,TLR9,KLB,NFATC1,GNG10,MEF2D,SYK,RCAN2,GATA4
Th1 and Th2 Activation Pathway	1.38	0.0811	TGFBR2,SOCS3,ITGB2,DLL1,PRKCQ,HAVCR1,PIK3R5,IL10RA,IL12RB2,JAK3,TLR9,KLB,DLL4,NFATC1,IL18R1
T Cell Receptor Signaling	1.36	0.0917	PRKCQ,CAMK4,CARD11,RASGRP1,PAG1,PIK3R5,IKBKE,TLR9,KLB,NFATC1
Growth Hormone Signaling	1.33	0.0988	SOCS3,PTPN6,PRKCQ,PIK3R5,RPS6KB2,PRKCH,TLR9,KLB
4-hydroxybenzoate Biosynthesis	1.31	1	TAT,
4-hydroxyphenylpyruvate Biosynthesis	1.31	1	TAT,
Thio-molybdenum Cofactor Biosynthesis	1.31	1	MOCOS,
Ubiquinol-10 Biosynthesis (Eukaryotic)	1.31	0.176	CYP11A1,MICAL2,CYP26A1
IL-6 Signaling	1.3	0.0866	IL1R2,SOCS3,IL1RAPL2,CRP,PIK3R5,HSPB7,IKBKE,MAPK13,TLR9,KLB,HSPB1
Type II Diabetes Mellitus Signaling	1.3	0.0866	SOCS3,PRKCQ,ACSL5,SH2B2,ACSL6,PIK3R5,PRKCH,IKBKE,TLR9,KLB,SMPD3

## Sheet: HHSt11 Cluster1 pathways
Ingenuity Canonical Pathways	-log(p-value)	Ratio	Molecules
Axonal Guidance Signaling	5.95	0.0489	EPHA7,GNG4,SLIT3,FZD10,ADAMTS8,NGEF,WNT3,EPHA4,SLIT2,PLXNA2,WNT8B,EFNB2,EPHB1,WNT3A,TUBB6,WNT7B,NGFR,GNAO1,UNC5D,VEGFD,PFN2,GLI1
PCP pathway	5.39	0.127	FZD10,RSPO3,WNT3A,WNT3,WNT7B,PFN2,SDC4,WNT8B
Wnt/β-catenin Signaling	5.06	0.071	FZD10,CDH1,CDH2,WNT3A,WNT3,APC2,DKK3,WNT7B,SOX10,GNAO1,SOX13,WNT8B
RhoGDI Signaling	4.96	0.0694	GNG4,CDH1,CDH2,ARHGDIG,CDH20,GNAO1,CDH6,RHOJ,ACTG2,DLC1,ACTA1,CDH11
Role of Osteoblasts, Osteoclasts and Chondrocytes in Rheumatoid Arthritis	4.34	0.056	FZD10,SPP1,WNT3,DLX5,MAP3K5,WNT8B,ITGB3,WNT3A,DKK3,APC2,NGFR,WNT7B,IL1RAP
Basal Cell Carcinoma Signaling	4.02	0.0972	FZD10,WNT3A,WNT3,APC2,WNT7B,GLI1,WNT8B
Regulation of the Epithelial-Mesenchymal Transition Pathway	3.9	0.0582	ETS1,FOXC2,FZD10,CDH1,CDH2,WNT3A,WNT3,WNT7B,SNAI1,TWIST1,WNT8B
Gα12/13 Signaling	3.85	0.0692	CDH1,CDH2,F2RL3,LPAR1,CDH20,CDH6,MEF2C,MAP3K5,CDH11
G-Protein Coupled Receptor Signaling	3.65	0.0478	VIPR2,GRM3,PTGER3,DUSP6,RGS7,GRM5,HRH1,LPAR1,HTR1E,RASGRP1,HTR7,GNAO1,PDE4D
Role of Macrophages, Fibroblasts and Endothelial Cells in Rheumatoid Arthritis	3.64	0.0453	TLR2,FZD10,WNT3A,WNT3,APC2,DKK3,WNT7B,NGFR,GNAO1,VEGFD,MAPKAPK2,IL1RAP,WNT8B,IRAK2
Transcriptional Regulatory Network in Embryonic Stem Cells	3.53	0.125	RFX4,ZIC3,PAX6,HNF4A,HOXB1
Role of Wnt/GSK-3β Signaling in the Pathogenesis of Influenza	3.03	0.0789	FZD10,WNT3A,WNT3,APC2,WNT7B,WNT8B
Colorectal Cancer Metastasis Signaling	2.92	0.0445	GNG4,TLR2,FZD10,CDH1,WNT3A,WNT3,PTGER3,WNT7B,VEGFD,RHOJ,WNT8B
Glutamate Receptor Signaling	2.81	0.0877	GRM5,GRM3,GRIA1,SLC1A3,GRIA4
MSP-RON Signaling Pathway	2.74	0.0847	TLR2,ITGB2,MST1R,ACTG2,ACTA1
cAMP-mediated signaling	2.72	0.0448	LPAR1,VIPR2,PTGER3,GRM3,HTR1E,DUSP6,RGS7,GNAO1,HTR7,PDE4D
Sumoylation Pathway	2.51	0.0625	ETS1,CDH1,ARHGDIG,RHOJ,MAP3K5,FAS
Signaling by Rho Family GTPases	2.41	0.0405	GNG4,CDH1,CDH2,CDH20,GNAO1,CDH6,RHOJ,ACTG2,ACTA1,CDH11
Ephrin Receptor Signaling	2.35	0.046	EPHA7,GNG4,EFNB2,NGEF,EPHB1,GNAO1,VEGFD,EPHA4
Granulocyte Adhesion and Diapedesis	2.3	0.0452	ITGB2,HRH1,CLDN1,NGFR,CXCL14,SDC4,IL1RAP,ITGB3
Human Embryonic Stem Cell Pluripotency	2.26	0.049	FZD10,WNT3A,WNT3,ZIC3,WNT7B,PDGFRA,WNT8B
Hepatic Fibrosis / Hepatic Stellate Cell Activation	2.22	0.0437	EDNRB,NGFR,PDGFRA,COL9A3,VEGFD,COL25A1,IL1RAP,FAS
p38 MAPK Signaling	2.1	0.0513	MEF2C,MAP3K5,MAPKAPK2,IL1RAP,FAS,IRAK2
Gαi Signaling	2.05	0.05	GNG4,LPAR1,PTGER3,GRM3,HTR1E,RGS7
ILK Signaling	2.04	0.0408	ITGB2,CDH1,SNAI1,VEGFD,RHOJ,ACTG2,ACTA1,ITGB3
LXR/RXR Activation	2.03	0.0496	RXRG,TTR,APOH,NGFR,GC,IL1RAP
RhoA Signaling	2.01	0.0492	NGEF,LPAR1,PFN2,ACTG2,DLC1,ACTA1
Glioblastoma Multiforme Signaling	2.01	0.044	FZD10,WNT3A,WNT3,WNT7B,PDGFRA,RHOJ,WNT8B
Molecular Mechanisms of Cancer	1.99	0.0321	FZD10,CDH1,WNT3A,WNT3,RASGRP1,WNT7B,GNAO1,RHOJ,MAP3K5,GLI1,WNT8B,FAS
Ephrin A Signaling	1.92	0.0667	EPHA7,NGEF,NGFR,EPHA4
Leukocyte Extravasation Signaling	1.88	0.0381	ITGB2,CLDN1,RASGRP1,JAM2,ACTG2,DLC1,ACTA1,ITGB3
Germ Cell-Sertoli Cell Junction Signaling	1.83	0.0405	CDH1,CDH2,TUBB6,RHOJ,MAP3K5,ACTG2,ACTA1
Calcium Signaling	1.77	0.0393	GRIA1,CAMKK1,MEF2C,TRPC6,RCAN2,GRIA4,ACTA1
Sertoli Cell-Sertoli Cell Junction Signaling	1.77	0.0393	CDH1,TUBB6,CLDN1,JAM2,MAP3K5,ACTG2,ACTA1
Remodeling of Epithelial Adherens Junctions	1.74	0.0588	CDH1,TUBB6,ACTG2,ACTA1
Agrin Interactions at Neuromuscular Junction	1.72	0.058	ITGB2,ACTG2,ACTA1,ITGB3
Ovarian Cancer Signaling	1.69	0.0417	FZD10,WNT3A,WNT3,WNT7B,VEGFD,WNT8B
Caveolar-mediated Endocytosis Signaling	1.67	0.0563	ITGB2,ACTG2,ACTA1,ITGB3
Epithelial Adherens Junction Signaling	1.66	0.0411	CDH1,CDH2,TUBB6,SNAI1,ACTG2,ACTA1
Ephrin B Signaling	1.64	0.0548	GNG4,EFNB2,EPHB1,GNAO1
Agranulocyte Adhesion and Diapedesis	1.64	0.037	ITGB2,HRH1,CLDN1,CXCL14,ACTG2,SDC4,ACTA1
IL-8 Signaling	1.55	0.0355	GNG4,ITGB2,CDH1,VEGFD,RHOJ,IRAK2,ITGB3
Role of NANOG in Mammalian Embryonic Stem Cell Pluripotency	1.45	0.041	FZD10,WNT3A,WNT3,WNT7B,WNT8B
Acute Phase Response Signaling	1.39	0.0355	TTR,APOH,NGFR,MAP3K5,IL1RAP,CRABP1
Tec Kinase Signaling	1.38	0.0353	GNG4,GNAO1,RHOJ,ACTG2,FAS,ACTA1
Integrin Signaling	1.34	0.032	ITGB2,PFN2,RHOJ,ACTG2,NEDD9,ACTA1,ITGB3
IL-1 Signaling	1.33	0.044	GNG4,GNAO1,IL1RAP,IRAK2
Regulation of Actin-based Motility by Rho	1.33	0.044	PFN2,RHOJ,ACTG2,ACTA1
Death Receptor Signaling	1.32	0.0435	MAP3K5,ACTG2,FAS,ACTA1

## Sheet: HHSt11 Cluster2 pathways
Ingenuity Canonical Pathways	-log(p-value)	Ratio	Molecules
Regulation of the Epithelial-Mesenchymal Transition Pathway	8.38	0.143	FGF8,EGF,WNT6,FOXC2,FGF10,FGF18,WNT7B,TGFB2,WNT4,FGF3,FGF7,WNT5B,FGF19,FGF16,TWIST2,WNT9A,FGF9,WNT2B,SNAI1,MMP2,TLR9,WNT8A,WNT3A,FGF20,JAG1,CLDN3,MMP9
Axonal Guidance Signaling	7.82	0.0978	RAC2,RGS3,MYL2,UNC5A,BMP2,UNC5B,CXCL12,EGF,WNT6,ADAM11,ABLIM1,ADAMTS2,NTN1,WNT7B,ADAM19,VEGFD,WNT4,ABLIM2,SEMA3B,PLCD4,WNT5B,PAPPA,ADAMTS13,FES,CXCR4,WNT9A,SEMA5A,WNT2B,MMP2,TLR9,ROBO3,PDGFB,BMP10,MYL1,WNT8A,WNT3A,NFATC2,GNAT2,EPHA5,SEMA4G,PAK5,SEMA3C,MMP9,NRP1
Cardiomyocyte Differentiation via BMP Receptors	6.42	0.4	NKX2-5,MYL2,BMP2,SMAD6,MYH7,BMPR1B,GATA4,BMP10
Leukocyte Extravasation Signaling	5.18	0.11	RAC2,CLDN11,VCAM1,ARHGAP6,CXCR4,CTNNA3,ITGA6,CXCL12,MMP2,NCF4,TLR9,TEC,EDIL3,CLDN5,TXK,CLDN16,EZR,CD44,ACTG2,ACTC1,CLDN3,MMP9,ARHGAP8/PRR5-ARHGAP8
Bladder Cancer Signaling	4.57	0.149	FGF16,FGF10,FGF18,FGF9,FGF8,EGF,VEGFD,FGF20,MMP2,FGF3,FGF7,MMP9,FGF19
Agranulocyte Adhesion and Diapedesis	4.37	0.106	CLDN11,VCAM1,MYL2,MYH13,CXCR4,CXCL12,ITGA6,MYH7,MMP2,MYL1,HRH1,CLDN5,CLDN16,EZR,CXCL14,ACTG2,ACTC1,CD34,CLDN3,MMP9
Actin Cytoskeleton Signaling	4.13	0.0965	FGF16,RAC2,MYL2,MYH13,FGF9,FGF8,EGF,MYH7,TLR9,MYL1,PDGFB,FGF10,FGF18,EZR,FGF20,PAK5,FGF3,ACTG2,FGF7,ARHGAP24,ACTC1,FGF19
Clathrin-mediated Endocytosis Signaling	4.12	0.102	FGF16,FGF9,FGF8,EGF,TLR9,PDGFB,ALB,FGF10,FGF18,TF,VEGFD,FGF20,FGF3,ACTG2,FGF7,ACTC1,ITGB5,SNAP91,FGF19,RBP4
Human Embryonic Stem Cell Pluripotency	3.9	0.112	BMP2,WNT9A,WNT2B,SMAD6,WNT6,TLR9,BMP10,PDGFB,NOG,WNT8A,WNT3A,FOXO1,WNT7B,TGFB2,WNT4,WNT5B
Ovarian Cancer Signaling	3.86	0.111	FGF9,WNT9A,WNT2B,EGF,MMP2,WNT6,TLR9,WNT8A,WNT3A,EDN1,WNT7B,CD44,WNT4,VEGFD,MMP9,WNT5B
BMP signaling pathway	3.83	0.145	NKX2-5,FST,RUNX2,BMP2,SMAD6,GREM1,BMPR1B,PITX2,NOG,TLX2,BMP10
Calcium Signaling	3.74	0.101	GRIN2B,TP63,CHRNA6,TNNI2,MYL2,MYH13,CHRNA9,TNNT2,CHRNB4,MYH7,CHRNA10,TRPC6,MYL1,ATP2B2,NFATC2,TNNI1,CHRNA3,ACTC1
Role of NANOG in Mammalian Embryonic Stem Cell Pluripotency	3.6	0.115	BMP2,WNT9A,WNT2B,WNT6,BMPR1B,TLR9,BMP10,WNT8A,WNT3A,WNT7B,WNT4,GATA6,GATA4,WNT5B
Role of Osteoblasts, Osteoclasts and Chondrocytes in Rheumatoid Arthritis	3.59	0.0905	TNFSF11,BMP2,WNT9A,WNT2B,SMAD6,WNT6,MAP3K5,TLR9,CSF1R,BMP10,WNT8A,WNT3A,WIF1,FOXO1,RUNX2,WNT7B,NFATC2,SFRP5,WNT4,DKK1,WNT5B
Hepatic Fibrosis / Hepatic Stellate Cell Activation	3.59	0.0984	VCAM1,EDNRB,MYL2,MYH13,COL12A1,FLT4,BAMBI,EGF,MMP2,MYH7,PDGFB,MYL1,FAS,TLR4,EDN1,TGFB2,VEGFD,MMP9
Wnt/β-catenin Signaling	3.54	0.101	WNT9A,SOX10,WNT2B,WNT6,WNT8A,WNT3A,WIF1,WNT7B,TGFB2,CD44,NR5A2,SFRP5,WNT4,PPP2R2C,SOX8,DKK1,WNT5B
Basal Cell Carcinoma Signaling	3.38	0.139	WNT8A,WNT3A,BMP2,WNT9A,WNT7B,WNT2B,WNT4,WNT6,WNT5B,BMP10
Netrin Signaling	3.2	0.179	RAC2,UNC5A,UNC5B,NFATC2,ABLIM2,ABLIM1,NTN1
PCP pathway	3.19	0.143	WNT8A,WNT3A,WNT9A,WNT7B,WNT2B,WNT4,WNT6,PRICKLE1,WNT5B
FGF Signaling	3.18	0.122	FGF16,FGF10,FGF18,FGF9,FGF8,FGF20,MAP3K5,FGF3,TLR9,FGF7,FGF19
Transcriptional Regulatory Network in Embryonic Stem Cells	3.13	0.175	RFX4,ISL1,GATA6,HAND1,MYF5,EOMES,GATA4
Role of Macrophages, Fibroblasts and Endothelial Cells in Rheumatoid Arthritis	2.69	0.0744	SOCS3,TNFSF11,VCAM1,WNT9A,WNT2B,CXCL12,WNT6,TLR9,PDGFB,TLR4,WNT8A,WNT3A,WIF1,F2RL1,WNT7B,TLR6,VEGFD,NFATC2,SFRP5,WNT4,DKK1,PLCD4,WNT5B
Sphingomyelin Metabolism	2.56	0.375	SGMS2,ENPP7,SMPD3
Factors Promoting Cardiogenesis in Vertebrates	2.55	0.109	NKX2-5,MYL2,BMP2,TGFB2,MYH7,BMPR1B,DKK1,NOG,GATA4,BMP10
Glioblastoma Multiforme Signaling	2.47	0.0881	RHOV,WNT8A,WNT3A,FOXO1,WNT9A,WNT7B,WNT2B,EGF,WNT4,WNT6,TLR9,PLCD4,WNT5B,PDGFB
ILK Signaling	2.42	0.0816	MYL2,MYH13,BMP2,SNAI1,MYH7,TLR9,MYL1,RHOV,SH2B2,VEGFD,PPP2R2C,ACTG2,ACTC1,DSP,ITGB5,MMP9
Cellular Effects of Sildenafil (Viagra)	2.36	0.0923	SLC4A5,ADCY2,CACNA1E,MYL2,GUCY2C,MYH13,GUCY1A2,MYH7,ACTG2,PLCD4,ACTC1,MYL1
Agrin Interactions at Neuromuscular Junction	2.31	0.116	RAC2,NRG2,ERBB4,MUSK,ITGA6,PAK5,ACTG2,ACTC1
Embryonic Stem Cell Differentiation into Cardiac Lineages	2.26	0.3	NKX2-5,ISL1,GATA4
TGF-β Signaling	2.21	0.103	NKX2-5,RUNX3,RUNX2,BMP2,SMAD6,TGFB2,BMPR1B,PITX2,TLX2
eNOS Signaling	2.16	0.0839	ADCY2,CHRNA9,FLT4,CHRNB4,CHRNA10,TLR9,AQP3,CCNA1,LPAR1,GUCY1A2,VEGFD,ESR2,CHRNA3
RhoGDI Signaling	2.15	0.0809	RHOV,ARHGAP6,CDH7,MYL2,EZR,CD44,CDH8,GNAT2,PAK5,ACTG2,ESR2,ACTC1,MYL1,ARHGAP8/PRR5-ARHGAP8
Colorectal Cancer Metastasis Signaling	2.14	0.0729	ADCY2,WNT9A,WNT2B,EGF,MMP2,WNT6,TLR9,TLR4,WNT8A,RHOV,WNT3A,WNT7B,TLR6,TGFB2,VEGFD,WNT4,MMP9,WNT5B
Thymine Degradation	2.08	0.5	DPYS,UPB1
Uracil Degradation II (Reductive)	2.08	0.5	DPYS,UPB1
Granulocyte Adhesion and Diapedesis	2.07	0.0791	CLDN11,HRH2,VCAM1,CXCR4,CXCL12,ITGA6,MMP2,HRH1,CLDN5,CLDN16,EZR,CXCL14,CLDN3,MMP9
Role of Wnt/GSK-3β Signaling in the Pathogenesis of Influenza	2.06	0.105	WNT8A,WNT3A,WNT9A,WNT7B,WNT2B,WNT4,WNT6,WNT5B
FXR/RXR Activation	2.03	0.0873	HPX,ALB,LCAT,FOXO1,APOH,TF,LPL,NR5A2,SLC22A7,FGF19,RBP4
VDR/RXR Activation	2	0.103	TNFSF11,CASR,FOXO1,RUNX2,TGFB2,SEMA3B,KLF4,HSD17B2
Epithelial Adherens Junction Signaling	1.97	0.0822	EPN3,DLL1,MYL2,LMO7,MYH13,SNAI1,TGFB2,EGF,MYH7,ACTG2,ACTC1,MYL1
LXR/RXR Activation	1.74	0.0826	TLR4,HPX,ALB,LCAT,APOH,TF,LPL,ABCA1,MMP9,RBP4
Caveolar-mediated Endocytosis Signaling	1.72	0.0986	ALB,ITGA8,ITGA6,EGF,ACTG2,ACTC1,ITGB5
Serotonin and Melatonin Biosynthesis	1.7	0.333	DDC,AANAT
Cardiac Hypertrophy Signaling	1.7	0.0681	MAP3K15,ADCY2,MYL2,HAND1,MAP3K5,TLR9,MYL1,ADRA1D,NKX2-5,RHOV,CACNA1E,TGFB2,GNAT2,MAP3K8,PLCD4,GATA4
Extrinsic Prothrombin Activation Pathway	1.66	0.188	F13A1,F7,TFPI
Integrin Signaling	1.65	0.0685	RAC2,CAPN8,RHOV,MYL2,TSPAN1,GRB7,ITGA8,ITGA6,PAK5,ACTG2,TLR9,ACTC1,PDGFB,ITGB5,CAPN3
Atherosclerosis Signaling	1.61	0.0787	VCAM1,ALB,LCAT,CXCR4,ABHD3,LPL,CXCL12,MMP9,PDGFB,RBP4
Tight Junction Signaling	1.55	0.0719	CLDN11,CLDN5,MYL2,MYH13,CLDN16,TGFB2,MYH7,PPP2R2C,ACTG2,ACTC1,CLDN3,MYL1
Molecular Mechanisms of Cancer	1.49	0.0588	RAC2,ADCY2,BMP2,WNT9A,WNT2B,SMAD6,WNT6,BMPR1B,MAP3K5,TLR9,FAS,BMP10,WNT8A,RHOV,WNT3A,FOXO1,WNT7B,TGFB2,GNAT2,WNT4,PAK5,WNT5B
Airway Pathology in Chronic Obstructive Pulmonary Disease	1.45	0.25	MMP2,MMP9
Germ Cell-Sertoli Cell Junction Signaling	1.45	0.0694	EPN3,RAC2,MAP3K15,RHOV,TGFB2,ITGA6,MAP3K8,PAK5,MAP3K5,ACTG2,TLR9,ACTC1
Circadian Rhythm Signaling	1.44	0.121	GRIN2B,ADCYAP1R1,VIPR2,BHLHE40
4-hydroxybenzoate Biosynthesis	1.42	1	TAT,
4-hydroxyphenylpyruvate Biosynthesis	1.42	1	TAT,
Role of JAK2 in Hormone-like Cytokine Signaling	1.39	0.118	SOCS3,SH2B2,SOCS2,PRLR
Leptin Signaling in Obesity	1.35	0.0824	NPY,SOCS3,ADCY2,FOXO1,POMC,TLR9,PLCD4
Maturity Onset Diabetes of Young (MODY) Signaling	1.35	0.143	NEUROD1,HNF1B,CACNA1E
NF-κB Signaling	1.34	0.0667	SIGIRR,TLR4,TNFSF11,BMP2,ZAP70,TLR6,FLT4,EGF,TNFAIP3,MAP3K8,BMPR1B,TLR9

## Sheet: HHSt13 Leader pathways
Ingenuity Canonical Pathways	-log(p-value)	Ratio	Molecules
UDP-N-acetyl-D-glucosamine Biosynthesis II	1.89	0.167	FMO3,
RhoA Signaling	1.54	0.0164	MYL2,TTN
Cardiomyocyte Differentiation via BMP Receptors	1.37	0.05	MYL2,
The Visual Cycle	1.37	0.05	RDH10,
Maturity Onset Diabetes of Young (MODY) Signaling	1.35	0.0476	HNF1B,

## Sheet: HHSt13 Trailer pathways
Ingenuity Canonical Pathways	-log(p-value)	Ratio	Molecules
Hepatic Fibrosis / Hepatic Stellate Cell Activation	7.99	0.0656	VCAM1,FLT1,EDN1,MYL2,LEPR,BAMBI,IL1RAPL1,TNFRSF1B,PDGFB,FGF1,COL3A1,AGT
Actin Cytoskeleton Signaling	2.84	0.0307	MYL2,APC2,ACTG2,TTN,ACTA1,PDGFB,FGF1
RhoGDI Signaling	2.77	0.0347	CDH5,MYL2,CDH20,GNG13,ACTG2,ACTA1
Integrin Signaling	2.26	0.0274	MYL2,TSPAN1,ACTG2,TTN,ACTA1,PDGFB
Role of Macrophages, Fibroblasts and Endothelial Cells in Rheumatoid Arthritis	2.12	0.0227	VCAM1,APC2,TLR6,IL1RAPL1,TNFRSF1B,PLCD4,PDGFB
Acute Phase Response Signaling	2.1	0.0296	ITIH2,APOH,F8,TNFRSF1B,AGT
Cardiomyocyte Differentiation via BMP Receptors	2.04	0.1	MYL2,SMAD6
Signaling by Rho Family GTPases	2.02	0.0243	CDH5,MYL2,CDH20,GNG13,ACTG2,ACTA1
LXR/RXR Activation	1.92	0.0331	APOH,IL1RAPL1,TNFRSF1B,AGT
RhoA Signaling	1.91	0.0328	MYL2,ACTG2,TTN,ACTA1
Agranulocyte Adhesion and Diapedesis	1.9	0.0265	VCAM1,CDH5,MYL2,ACTG2,ACTA1
Agrin Interactions at Neuromuscular Junction	1.85	0.0435	NRG1,ACTG2,ACTA1
IL-8 Signaling	1.83	0.0254	VCAM1,FLT1,MYL2,GNG13,TEK
Cellular Effects of Sildenafil (Viagra)	1.82	0.0308	MYL2,ACTG2,PLCD4,ACTA1
Intrinsic Prothrombin Activation Pathway	1.72	0.069	F8,COL3A1
Epithelial Adherens Junction Signaling	1.65	0.0274	MYL2,ACTG2,ACTA1,FGF1
GPCR-Mediated Nutrient Sensing in Enteroendocrine Cells	1.61	0.0353	TRPM5,GNG13,PLCD4
Crosstalk between Dendritic Cells and Natural Killer Cells	1.56	0.0337	ACTG2,TNFRSF1B,ACTA1
Regulation of Actin-based Motility by Rho	1.54	0.033	MYL2,ACTG2,ACTA1
Death Receptor Signaling	1.53	0.0326	ACTG2,TNFRSF1B,ACTA1
PPAR Signaling	1.51	0.0323	IL1RAPL1,TNFRSF1B,PDGFB
Netrin Signaling	1.48	0.0513	UNC5B,RYR2
Tight Junction Signaling	1.47	0.024	MYL2,ACTG2,TNFRSF1B,ACTA1
Gap Junction Signaling	1.46	0.0238	HTR2C,ACTG2,PLCD4,ACTA1
Mechanisms of Viral Exit from Host Cells	1.44	0.0488	ACTG2,ACTA1
Serotonin Receptor Signaling	1.41	0.0465	HTR2C,HTR1A
VEGF Signaling	1.4	0.0291	FLT1,ACTG2,ACTA1
Granulocyte Adhesion and Diapedesis	1.39	0.0226	VCAM1,CDH5,IL1RAPL1,TNFRSF1B
Calcium Signaling	1.38	0.0225	MYL2,RYR2,CHRNB4,ACTA1
Dermatan Sulfate Biosynthesis (Late Stages)	1.34	0.0426	SULT1C2,HS3ST6
Axonal Guidance Signaling	1.33	0.0156	ADAMTS13,MYL2,GLIS1,UNC5B,GNG13,PLCD4,PDGFB
Dendritic Cell Maturation	1.3	0.0211	LEPR,TNFRSF1B,PLCD4,COL3A1

## Sheet: HHSt15 Leader pathways
Ingenuity Canonical Pathways	-log(p-value)	Ratio	Molecules
Netrin Signaling	3.64	0.103	RYR2,UNC5D,ABLIM2,NTN1
Tyrosine Degradation I	3.23	0.4	TAT,HGD
Axonal Guidance Signaling	3.12	0.0244	EPHA7,SHH,PDGFA,NTRK1,ITGA2,UNC5D,WNT6,ABLIM2,SEMA3B,ADAM8,NTN1
Dopamine-DARPP32 Feedback in cAMP Signaling	2.79	0.037	KCNJ8,KCNJ15,ADCY3,PPM1L,ADCY8,GRIN3A
GPCR-Mediated Integration of Enteroendocrine Signaling Exemplified by an L Cell	2.63	0.0556	ADCY3,GRP,ADCY8,CALCA
Human Embryonic Stem Cell Pluripotency	2.29	0.035	FGF4,PDGFA,NTRK1,WNT6,NOG
Melanocyte Development and Pigmentation Signaling	2.2	0.0421	PAX3,SOX10,ADCY3,ADCY8
CDK5 Signaling	2.14	0.0404	ADCY3,ITGA2,PPM1L,ADCY8
4-hydroxybenzoate Biosynthesis	2.11	1	TAT,
4-hydroxyphenylpyruvate Biosynthesis	2.11	1	TAT,
Actin Cytoskeleton Signaling	2.06	0.0263	FGF4,PDGFA,ITGA2,TTN,ACTA1,FGF19
Gαs Signaling	1.99	0.0367	ADCY3,RYR2,CRHR1,ADCY8
Corticotropin Releasing Hormone Signaling	1.97	0.036	SHH,ADCY3,CRHR1,ADCY8
Hepatic Fibrosis / Hepatic Stellate Cell Activation	1.86	0.0273	VCAM1,COL9A1,EDNRB,PDGFA,COL9A3
Sphingosine-1-phosphate Signaling	1.82	0.0325	PDGFA,ADCY3,ADCY8,SMPD3
GABA Receptor Signaling	1.82	0.0448	GABRA4,ADCY3,ADCY8
Caveolar-mediated Endocytosis Signaling	1.76	0.0423	ITGA2,CAV1,ACTA1
Clathrin-mediated Endocytosis Signaling	1.73	0.0254	FGF4,PDGFA,ACTA1,FGF19,APOD
Glutathione-mediated Detoxification	1.68	0.069	GSTA3,HPGDS
Angiopoietin Signaling	1.66	0.039	DOK2,TEK,TIE1
Dopamine Receptor Signaling	1.66	0.039	ADCY3,PPM1L,ADCY8
Cardiac β-adrenergic Signaling	1.66	0.0292	ADCY3,PPM1L,RYR2,ADCY8
S-adenosyl-L-methionine Biosynthesis	1.64	0.333	MAT1A,
Thyroid Hormone Biosynthesis	1.64	0.333	IYD,
Catecholamine Biosynthesis	1.52	0.25	PNMT,
eNOS Signaling	1.49	0.0258	AQP3,ADCY3,CAV1,ADCY8
Noradrenaline and Adrenaline Degradation	1.42	0.05	PNMT,DHRS9
Transcriptional Regulatory Network in Embryonic Stem Cells	1.42	0.05	GBX2,HOXB1
Gap Junction Signaling	1.38	0.0238	ADCY3,CAV1,ADCY8,ACTA1
Serotonin Receptor Signaling	1.36	0.0465	ADCY3,ADCY8
PAK Signaling	1.36	0.0297	PDGFA,ITGA2,DSCAM
Virus Entry via Endocytic Pathways	1.35	0.0294	ITGA2,CAV1,ACTA1
Ephrin Receptor Signaling	1.34	0.023	EPHA7,PDGFA,ITGA2,GRIN3A
Chondroitin and Dermatan Biosynthesis	1.34	0.167	CSGALNACT1,
Calcium Signaling	1.31	0.0225	RYR2,RCAN2,ACTA1,GRIN3A
Role of Oct4 in Mammalian Embryonic Stem Cell Pluripotency	1.31	0.0435	FGF4,HOXB1

## Sheet: HHSt15 Trailer pathways
Ingenuity Canonical Pathways	-log(p-value)	Ratio	Molecules
Calcium Signaling	4.64	0.0562	GRIN2A,MYL2,TNNI2,TNNT3,GRIA1,CHRNB4,CHRNA10,CHRNA3,ACTA1,TRPC7
nNOS Signaling in Neurons	3.85	0.106	NOS1,GRIN2A,DLG2,PRKCH,RASD1
Thrombin Signaling	3.45	0.0443	GATA5,RHOV,MYL2,ADCY1,PIK3R6,GNG13,GATA6,PRKCH,GNA14
CXCR4 Signaling	3.38	0.0485	RHOV,MYL2,EGR1,ADCY1,PIK3R6,GNG13,PRKCH,GNA14
RhoGDI Signaling	3.25	0.0462	RHOV,CDH4,CDH12,MYL2,GNG13,GNA14,CDH13,ACTA1
Synaptic Long Term Depression	3	0.0479	NOS1,GRIA1,PPP1R17,PRKCH,PPP2R2C,GNA14,CRHR1
Regulation of the Epithelial-Mesenchymal Transition Pathway	3	0.0423	LOX,FGF16,CDH12,FGF9,EGR1,FGF8,PIK3R6,PDGFRB
Amyotrophic Lateral Sclerosis Signaling	2.9	0.0541	NOS1,GRIN2A,GRIA1,NEFM,PIK3R6,NEFH
eNOS Signaling	2.85	0.0452	ADCY1,PIK3R6,CHRNB4,PRKCH,CHRNA10,CHRNA3,LPAR3
Signaling by Rho Family GTPases	2.85	0.0364	RHOV,CDH4,CDH12,MYL2,PIK3R6,GNG13,GNA14,CDH13,ACTA1
Tec Kinase Signaling	2.62	0.0412	TLR4,RHOV,PIK3R6,GNG13,PRKCH,GNA14,ACTA1
Gα12/13 Signaling	2.56	0.0462	CDH4,CDH12,MYL2,PIK3R6,CDH13,LPAR3
CREB Signaling in Neurons	2.43	0.038	GRIN2A,GRIA1,ADCY1,PIK3R6,GNG13,PRKCH,GNA14
Gαs Signaling	2.2	0.0459	ADCY1,GNG13,DRD5,CRHR1,ADORA2A
Dopamine-DARPP32 Feedback in cAMP Signaling	2.09	0.037	NOS1,GRIN2A,ADCY1,DRD5,PRKCH,PPP2R2C
BMP signaling pathway	2.05	0.0526	NKX2-5,RUNX2,NOG,TLX2
Synaptic Long Term Potentiation	2.02	0.0417	GRIN2A,GRIA1,ADCY1,PRKCH,GNA14
Phagosome Formation	2	0.041	TLR4,RHOV,PIK3R6,PRKCH,FCER2
RhoA Signaling	2	0.041	NGEF,MYL2,PLEKHG5,LPAR3,ACTA1
Prolactin Signaling	1.92	0.0482	PIK3R6,PRKCH,NR3C1,IRF1
GPCR-Mediated Nutrient Sensing in Enteroendocrine Cells	1.88	0.0471	ADCY1,GNG13,PRKCH,GNA14
Cardiac Hypertrophy Signaling	1.87	0.0298	NKX2-5,RHOV,MYL2,ADCY1,PIK3R6,GNG13,GNA14
P2Y Purigenic Receptor Signaling Pathway	1.86	0.0379	P2RY4,ADCY1,PIK3R6,GNG13,PRKCH
G Beta Gamma Signaling	1.83	0.0455	ADCY1,GNG13,PRKCH,GNA14
Endothelin-1 Signaling	1.81	0.0321	NOS1,EDN1,ADCY1,PIK3R6,PRKCH,GNA14
FGF Signaling	1.8	0.0444	FGF16,FGF9,FGF8,PIK3R6
Factors Promoting Cardiogenesis in Vertebrates	1.77	0.0435	NKX2-5,MYL2,PRKCH,NOG
Production of Nitric Oxide and Reactive Oxygen Species in Macrophages	1.75	0.0311	TLR4,RHOV,PIK3R6,PRKCH,PPP2R2C,IRF1
Cardiomyocyte Differentiation via BMP Receptors	1.72	0.1	NKX2-5,MYL2
IL-8 Signaling	1.71	0.0305	RHOV,MYL2,PIK3R6,GNG13,PRKCH,TEK
CDK5 Signaling	1.66	0.0404	EGR1,ADCY1,DRD5,PPP2R2C
MSP-RON Signaling Pathway	1.6	0.0508	TLR4,PIK3R6,ACTA1
G-Protein Coupled Receptor Signaling	1.56	0.0257	RASGRP1,ADCY1,PIK3R6,DRD5,GNA14,CRHR1,ADORA2A
Gαq Signaling	1.54	0.0312	RHOV,PIK3R6,GNG13,PRKCH,GNA14
Corticotropin Releasing Hormone Signaling	1.5	0.036	NOS1,ADCY1,PRKCH,CRHR1
Neuropathic Pain Signaling In Dorsal Horn Neurons	1.47	0.0351	GRIN2A,GRIA1,PIK3R6,PRKCH
Xenobiotic Metabolism Signaling	1.45	0.0244	PIK3R6,PRKCH,UGT8,PPP2R2C,HS3ST4,SOD3,HS3ST5
Actin Cytoskeleton Signaling	1.44	0.0263	FGF16,MYL2,FGF9,FGF8,PIK3R6,ACTA1
Renin-Angiotensin Signaling	1.4	0.0333	ADCY1,PIK3R6,PRKCH,AGT
Glycerol-3-phosphate Shuttle	1.38	0.25	GPD1,
GPCR-Mediated Integration of Enteroendocrine Signaling Exemplified by an L Cell	1.38	0.0417	ADCY1,GNA14,CALCA
Phospholipase C Signaling	1.37	0.0253	TGM2,RHOV,MYL2,ADCY1,GNG13,PRKCH
Heparan Sulfate Biosynthesis (Late Stages)	1.36	0.0411	HS3ST4,RPE65,HS3ST5
Sphingosine-1-phosphate Signaling	1.36	0.0325	RHOV,ADCY1,PIK3R6,PDGFRB
Gustation Pathway	1.35	0.0323	P2RY4,PKD1L3,ADCY1,GNG13
Huntington's Disease Signaling	1.34	0.0249	TGM2,NEUROD1,PIK3R6,GNG13,PRKCH,GNA14
Hepatic Fibrosis / Hepatic Stellate Cell Activation	1.33	0.0273	TLR4,EDN1,MYL2,AGT,PDGFRB
Antiproliferative Role of Somatostatin Receptor 2	1.33	0.04	NOS1,PIK3R6,GNG13
MIF-mediated Glucocorticoid Regulation	1.31	0.0606	TLR4,NR3C1
GNRH Signaling	1.3	0.031	EGR1,ADCY1,PRKCH,GNA14
Dopamine Receptor Signaling	1.3	0.039	ADCY1,DRD5,PPP2R2C
