# Supplementary material for: Single-cell transcriptome analysis of avian neural crest migration reveals signatures of invasion and molecular transitions
Source: eLife. 2017 Dec 4;6:e28415. doi: 10.7554/eLife.28415 (PMC5728719; doi:10.7554/eLife.28415)
Supplement: Figure 6—source data 1. — The three morpholinos tested as well as the gene Ensemble IDs and primer sequences used to test morpholino activity are shown. Primers were also designed and used for sequence upstream of the region targeted by morpholino for controls. [file elife-28415-fig6-data1.xlsx]

## Sheet: List of Tabs
List of Tabs
HH13_leaders_v_all_other_invivo
HH13_trailers_v_all_other_inviv
HH15_leaders_v_all_other_invivo
HH15_trailers_v_all_other_inviv

## Sheet: HH13_leaders_v_all_other_invivo
ensid	Name	Chr	Start	End	Strand	Biotype	Description	HH15_Invasive_Front_v_other.log2fc	HH15_Invasive_Front_v_other.log2cpm	HH15_Invasive_Front_v_other.pval	HH15_Invasive_Front_v_other.padj	HH13_Invasive_Front_v_other.log2fc	HH13_Invasive_Front_v_other.log2cpm	HH13_Invasive_Front_v_other.pval	HH13_Invasive_Front_v_other.padj	HH11_Invasive_Front_v_other.log2fc	HH11_Invasive_Front_v_other.log2cpm	HH11_Invasive_Front_v_other.pval	HH11_Invasive_Front_v_other.padj	HH15_Leader_v_other.log2fc	HH15_Leader_v_other.log2cpm	HH15_Leader_v_other.pval	HH15_Leader_v_other.padj	HH13_Leader_v_other.log2fc	HH13_Leader_v_other.log2cpm	HH13_Leader_v_other.pval	HH13_Leader_v_other.padj	HH15_Trailer_v_other.log2fc	HH15_Trailer_v_other.log2cpm	HH15_Trailer_v_other.pval	HH15_Trailer_v_other.padj	HH13_Trailer_v_other.log2fc	HH13_Trailer_v_other.log2cpm	HH13_Trailer_v_other.pval	HH13_Trailer_v_other.padj
ENSGALG00000027460	gga-mir-6621	chr1	2622379	2622488	+	miRNA	gga-mir-6621 [Source:miRBase;Acc:MI0022441]	-1.81399	0.303271	0.00863689	0.0898093	-1.08278	0.303268	0.108163	0.422933	2.5903	0.303271	1.37899e-12	3.9439e-10	-1.91392	0.303266	0.00850814	0.142211	-2.69597	0.303264	0.000203445	0.040156	-1.6734	0.303268	0.018936	0.191286	0.0735291	0.303265	0.835143	0.992118
ENSGALG00000008635		chr1	20126933	20130565	-	protein_coding	Uncharacterized protein [Source:UniProtKB/TrEMBL;Acc:F1NLQ7]	3.69167	6.65201	2.96665e-05	0.00166966	-0.0163403	6.65201	0.842097	0.968657	-9.68937	6.65201	1.0438e-09	1.53977e-07	1.05981	6.65201	0.258487	0.761373	-10.2482	6.65201	6.56396e-06	0.00511041	-10.9922	6.65201	3.53732e-06	0.000505836	-8.78939	6.65201	6.75156e-06	0.00497981
ENSGALG00000010204	KCNC2	chr1	37557146	37660197	-	protein_coding	potassium channel, voltage gated Shaw related subfamily C, member 2 [Source:HGNC Symbol;Acc:HGNC:6234]	0.542131	1.88312	0.43738	0.79456	0.450266	1.8831	0.505946	0.834613	-0.199694	1.88312	0.86037	0.948811	0.0236785	1.8831	0.848133	0.987403	-5.73751	1.88309	1.05511e-05	0.00616095	1.51961	1.88311	0.0441022	0.295771	-1.7815	1.88309	0.0866886	0.566366
ENSGALG00000019325		chr1	49029412	49037608	+	protein_coding	Uncharacterized protein [Source:UniProtKB/TrEMBL;Acc:E1BZ47]	-5.31718	1.12245	0.00163857	0.0319762	-0.233734	1.12243	1	1	-2.04838	1.12245	0.111601	0.36782	-1.17849	1.12241	0.591355	0.93606	3.91777	1.1224	2.4786e-05	0.0117833	-5.30459	1.12243	0.00374729	0.0795675	-1.14597	1.1224	0.506734	0.955641
ENSGALG00000028048	PTN	chr1	57819052	57871230	+	protein_coding	pleiotrophin precursor [Source:RefSeq peptide;Acc:NP_001263291]	-2.03551	5.93775	0.00574043	0.069798	-1.66622	5.93775	0.0225643	0.18406	2.8246	5.93775	2.23519e-12	6.02385e-10	-1.46926	5.93775	0.0497407	0.357451	-3.29118	5.93775	3.85041e-05	0.0168515	-1.7451	5.93775	0.0199555	0.19708	-0.0777575	5.93775	0.961632	1
ENSGALG00000014240	PKDREJ	chr1	71473108	71512233	-	protein_coding	polycystin (PKD) family receptor for egg jelly [Source:HGNC Symbol;Acc:HGNC:9015]	-0.893987	0.625117	0.10778	0.408443	-0.500902	0.625132	0.37938	0.76407	-1.1735	0.625119	0.00529159	0.0475989	-1.21485	0.62514	0.0357779	0.303779	2.41517	0.625146	1.36804e-10	9.58585e-07	0.346225	0.625129	0.428674	0.820689	-0.955246	0.625145	0.0562563	0.45492
ENSGALG00000014695	CLCN1	chr1	77089395	77125849	-	protein_coding	chloride channel, voltage-sensitive 1 [Source:HGNC Symbol;Acc:HGNC:2019]	-1.00052	0.901121	0.507592	0.834258	-0.303005	0.901106	0.942922	0.997987	1.11702	0.90112	0.135435	0.411836	-0.342971	0.901097	0.931485	1	-4.98734	0.901092	0.000208345	0.040536	0.92284	0.901109	0.274284	0.701044	-0.270017	0.901093	0.921301	0.997671
ENSGALG00000015358	myosin	chr1	86879998	86923778	-	protein_coding	myosin heavy chain, cardiac muscle isoform [Source:RefSeq peptide;Acc:NP_990097]	6.06334	6.20652	4.36631e-30	3.05947e-26	-2.57961	6.20652	0.0200859	0.173435	-2.90246	6.20652	0.000429857	0.00720576	-4.34933	6.20652	0.000558138	0.0347633	-5.19653	6.20652	4.20868e-05	0.0168515	-4.23789	6.20652	0.000621472	0.0268774	-3.76838	6.20652	0.000357425	0.0365617
ENSGALG00000015379	TAGLN3	chr1	87951757	87962695	+	protein_coding	transgelin 3 [Source:HGNC Symbol;Acc:HGNC:29868]	-8.73993	5.44937	0.000173422	0.00647331	-9.29233	5.44937	8.37034e-05	0.00598479	-7.00474	5.44937	9.73792e-06	0.000411046	-0.270157	5.44937	0.960446	1	-9.47484	5.44937	4.85163e-05	0.0174518	5.76176	5.44937	7.35273e-11	5.15206e-08	-3.57279	5.44937	0.0400613	0.378569
ENSGALG00000016745	GABRB3	chr1	130705242	130819496	+	protein_coding	Gallus gallus gamma-aminobutyric acid (GABA) A receptor, beta 3 (GABRB3), mRNA. [Source:RefSeq mRNA;Acc:NM_205346]	-6.17039	1.75795	9.27973e-05	0.00407668	1.31888	1.75796	0.149621	0.499832	1.20703	1.75796	0.134051	0.409758	-1.10287	1.75797	0.546698	0.929022	-6.16604	1.75797	0.00011426	0.0291134	1.06859	1.75796	0.239892	0.662826	-1.91712	1.75797	0.176526	0.751014
ENSGALG00000022749		chr1	145645684	145647112	-	protein_coding	Uncharacterized protein [Source:UniProtKB/TrEMBL;Acc:F1NAA0]	-2.0409	-0.296732	0.0273603	0.182151	-2.03875	-0.296741	0.0274815	0.203756	-0.619228	-0.296733	0.495913	0.772789	-2.02967	-0.296747	0.0332531	0.29162	2.79951	-0.29675	0.000119154	0.0298184	-2.02965	-0.296739	0.0430336	0.290918	0.497386	-0.296749	0.466417	0.946682
ENSGALG00000017254	DLG2	chr1	188459667	189196267	-	protein_coding	discs, large homolog 2 (Drosophila) [Source:HGNC Symbol;Acc:HGNC:2901]	-1.43273	1.82867	0.372195	0.747269	-1.8294	1.82866	0.253116	0.646574	-1.42818	1.82867	0.195929	0.501882	0.235464	1.82866	0.680851	0.957977	-6.02825	1.82865	0.000248634	0.0446713	3.49389	1.82866	3.6578e-05	0.00355975	-1.39228	1.82865	0.322292	0.889087
ENSGALG00000017308	CHRDL2	chr1	194991364	195010253	+	protein_coding	chordin-like 2 [Source:HGNC Symbol;Acc:HGNC:24168]	-1.89116	-0.324949	0.0419128	0.232237	-1.88894	-0.324952	0.0418793	0.255173	-0.537359	-0.324949	0.595608	0.830698	-1.88	-0.324954	0.0495201	0.356616	3.61891	-0.324955	1.61933e-07	0.000319247	-1.88061	-0.324952	0.063586	0.355584	-1.922	-0.324955	0.0184747	0.235898
ENSGALG00000009482	HEPACAM2	chr2	23053747	23075529	-	protein_coding	HEPACAM family member 2 [Source:HGNC Symbol;Acc:HGNC:27364]	-2.7365	-0.132988	0.0120547	0.109841	-1.96663	-0.133005	0.127207	0.458507	-2.76137	-0.132989	0.000760539	0.0111255	-2.31709	-0.133014	0.0726737	0.433877	4.05482	-0.13302	4.26353e-08	0.000119498	-2.72449	-0.133001	0.0210822	0.20295	-0.0699313	-0.133019	1	1
ENSGALG00000009686	PPP1R9A	chr2	23846203	23968530	+	protein_coding	protein phosphatase 1, regulatory subunit 9A [Source:HGNC Symbol;Acc:HGNC:14946]	1.6708	1.19176	0.0584157	0.284842	-0.364682	1.19175	0.916107	0.988811	-0.920949	1.19176	0.395626	0.701009	0.865552	1.19174	0.318365	0.812936	-5.41692	1.19174	0.000192108	0.03846	0.124605	1.19175	0.75489	0.951437	-0.479279	1.19174	0.789097	0.988382
ENSGALG00000011202	COLQ	chr2	34463938	34490356	-	protein_coding	collagen-like tail subunit (single strand of homotrimer) of asymmetric acetylcholinesterase [Source:HGNC Symbol;Acc:HGNC:2226]	1.42142	1.54904	0.123709	0.43881	-4.33681	1.54903	0.0107406	0.120899	0.875629	1.54904	0.276867	0.598432	-5.88314	1.54902	0.000282887	0.0237388	-5.89527	1.54901	0.000219399	0.040536	0.70844	1.54903	0.409301	0.808878	0.191811	1.54901	0.724671	0.981811
ENSGALG00000026505	RDH10	chr2	117438975	117467086	+	protein_coding	retinol dehydrogenase 10 (all-trans) [Source:RefSeq peptide;Acc:NP_001186388]	2.86635	2.30271	0.00113047	0.0254737	-0.539171	2.30273	0.825063	0.964472	-0.290444	2.30271	0.856613	0.947313	0.0763444	2.30275	0.782156	0.977886	-6.82033	2.30275	4.98124e-05	0.0174518	-1.28426	2.30273	0.466492	0.841367	-3.14284	2.30275	0.0336469	0.342431
ENSGALG00000027207		chr3	53787119	53797292	+	protein_coding	PERP, TP53 apoptosis effector [Source:RefSeq peptide;Acc:NP_001264633]	2.94145	3.44913	0.00104682	0.0240889	-0.154147	3.44913	0.930966	0.994009	-1.30689	3.44913	0.26286	0.584363	0.781135	3.44913	0.378267	0.849479	-8.07858	3.44914	1.33883e-05	0.00721627	-4.72157	3.44913	0.013023	0.158976	-1.63562	3.44914	0.269571	0.859557
ENSGALG00000015517	KLHL32	chr3	71939187	72029882	-	protein_coding	kelch-like family member 32 [Source:HGNC Symbol;Acc:HGNC:21221]	1.13154	1.57414	0.0848258	0.354427	-0.353238	1.57413	0.773601	0.94936	-1.23264	1.57414	0.0809138	0.304491	0.688632	1.57413	0.297945	0.797899	-4.23819	1.57413	0.000124827	0.0301608	0.40785	1.57414	0.507819	0.859697	0.484161	1.57413	0.422091	0.935921
ENSGALG00000015928		chr3	80944374	80961995	-	protein_coding	Uncharacterized protein [Source:UniProtKB/TrEMBL;Acc:F1NVJ6]	-2.09137	-0.312892	0.0379235	0.220066	-0.00789682	-0.312735	1	1	-2.23558	-0.312877	0.00148232	0.0185807	-2.06672	-0.312647	0.0457412	0.340605	3.67437	-0.312589	3.40471e-06	0.00318091	-0.34041	-0.312763	0.966687	1	-2.12631	-0.312598	0.0163859	0.220165
ENSGALG00000026941	EVA1A	chr3	110190488	110259846	-	protein_coding	eva-1 homolog A (C. elegans) [Source:HGNC Symbol;Acc:HGNC:25816]	0.204204	0.45935	0.705517	0.919817	0.396628	0.459338	0.56025	0.862357	-0.236679	0.459349	0.848356	0.94356	0.58795	0.459331	0.430656	0.880312	-4.23392	0.459326	0.000220402	0.040536	0.582258	0.45934	0.433115	0.822826	-0.0520253	0.459327	1	1
ENSGALG00000006087	GPC3	chr4	3824471	3937271	-	protein_coding	glypican 3 [Source:HGNC Symbol;Acc:HGNC:4451]	2.98115	6.16386	1.08626e-06	0.000109516	0.128248	6.16386	0.764757	0.946158	-1.7732	6.16386	0.0173378	0.110542	0.00221269	6.16386	0.880826	0.992645	-4.31267	6.16386	0.000191316	0.03846	-0.137987	6.16386	0.984651	1	-4.1055	6.16386	5.97607e-05	0.0164213
ENSGALG00000007309	RIPPLY1	chr4	10917000	10918178	-	protein_coding	ripply transcriptional repressor 1 [Source:HGNC Symbol;Acc:HGNC:25117]	1.03424	-0.251165	0.186339	0.54463	-2.25651	-0.251181	0.022942	0.185951	-2.28101	-0.251166	0.00240942	0.0265452	-2.2471	-0.25119	0.0277845	0.265733	2.87613	-0.251196	0.00017598	0.0379412	-2.24707	-0.251178	0.0372865	0.27248	-0.577281	-0.251195	0.703735	0.979226
ENSGALG00000007546		chr4	11303685	11326754	-	protein_coding	Uncharacterized protein [Source:UniProtKB/TrEMBL;Acc:E1BR53]	0.854781	-0.227072	0.327234	0.708662	-2.53885	-0.22687	0.0237243	0.189492	-2.7007	-0.227053	0.000666874	0.0100167	-2.52281	-0.226757	0.0285262	0.269021	3.83134	-0.226683	6.1805e-06	0.00509492	-2.54509	-0.226907	0.0394609	0.279988	-2.58397	-0.226694	0.00939977	0.164045
ENSGALG00000011190		chr4	45841896	45843110	-	protein_coding	Uncharacterized protein [Source:UniProtKB/TrEMBL;Acc:F1P0D3]	-0.143874	0.73062	1	1	-0.0313939	0.730614	1	1	1.04475	0.730619	0.0932521	0.330176	-0.101763	0.73061	1	1	-4.71813	0.730608	1.05368e-05	0.00616095	-0.23516	0.730615	0.941469	0.998063	0.0695025	0.730609	0.831902	0.992118
ENSGALG00000023172		chr4	48984184	48996527	+	protein_coding	Uncharacterized protein [Source:UniProtKB/TrEMBL;Acc:F1NCJ5]	-2.05908	-0.293727	0.0308986	0.1962	-0.397795	-0.293732	0.918876	0.990037	-0.277556	-0.293728	0.814148	0.930778	-2.04744	-0.293734	0.0365183	0.306815	3.18312	-0.293736	1.28778e-05	0.00721627	-2.04816	-0.293731	0.0484897	0.31007	-2.0912	-0.293736	0.012757	0.193481
ENSGALG00000014080	CWH43	chr4	65834288	65859538	-	protein_coding	cell wall biogenesis 43 C-terminal homolog (S. cerevisiae) [Source:HGNC Symbol;Acc:HGNC:26133]	-0.0273554	0.602782	1	1	-0.853747	0.602767	0.153071	0.50581	0.244065	0.60278	0.50389	0.776738	-1.5488	0.602758	0.0122422	0.170879	2.38256	0.602752	6.33882e-10	2.4817e-06	-2.34395	0.602769	0.000180964	0.0115877	-2.07877	0.602753	9.19779e-05	0.02046
ENSGALG00000015013	MSX1	chr4	78388177	78390740	+	protein_coding	Homeobox protein GHOX-7 [Source:UniProtKB/Swiss-Prot;Acc:P50223]	0.638085	7.37331	0.152504	0.492215	-2.21273	7.37331	0.000327162	0.0152321	2.16292	7.37331	4.10801e-10	6.87709e-08	-1.57257	7.37331	0.0102738	0.155819	-2.31465	7.37331	0.000186797	0.03846	-1.49073	7.37331	0.0134988	0.162126	-0.742673	7.37331	0.151334	0.708349
ENSGALG00000023393		chr5	18304373	18308342	+	protein_coding	Uncharacterized protein [Source:UniProtKB/TrEMBL;Acc:E1BSE9]	-0.966536	0.556445	0.429994	0.78969	-0.785358	0.556447	0.552681	0.858685	-0.464497	0.556445	0.621006	0.842138	-1.4609	0.556448	0.244824	0.746738	-4.4194	0.556449	8.58442e-05	0.0235886	2.85914	0.556447	6.73596e-05	0.00552034	-0.345942	0.556449	0.816328	0.989013
ENSGALG00000012248	MAP3K9	chr5	26586981	26631624	+	protein_coding	mitogen-activated protein kinase kinase kinase 9 [Source:HGNC Symbol;Acc:HGNC:6861]	0.455977	1.01091	0.533869	0.845136	1.05144	1.01089	0.21804	0.603252	0.968406	1.01091	0.197711	0.504135	-2.17479	1.01088	0.150431	0.618766	-5.15194	1.01087	0.000186274	0.03846	-0.104306	1.01089	1	1	-0.860431	1.01087	0.526881	0.959678
ENSGALG00000005956		chr6	17424714	17438731	-	protein_coding	Annexin [Source:UniProtKB/TrEMBL;Acc:E1C8K3]	2.84532	2.25665	0.00277397	0.0447862	-2.09942	2.25667	0.255006	0.648575	-2.61237	2.25665	0.0411644	0.200653	2.24804	2.25668	0.023804	0.241286	-6.76619	2.25668	0.000222726	0.040536	-3.22735	2.25666	0.0948692	0.437623	-6.0045	2.25668	0.000470663	0.0390986
ENSGALG00000029169	HHEX	chr6	20253583	20257076	-	protein_coding	hematopoietically-expressed homeobox protein HHEX [Source:RefSeq peptide;Acc:NP_990583]	3.27329	3.89377	0.000197597	0.00713691	1.39475	3.89377	0.135357	0.475055	-3.81454	3.89377	0.00236396	0.0262925	-0.203046	3.89377	0.951255	1	-7.95969	3.89377	5.56137e-05	0.0180848	-4.86244	3.89377	0.0106921	0.142569	-4.62008	3.89377	0.00431312	0.105857
ENSGALG00000009089	titin	chr7	14648300	14691849	+	protein_coding	Uncharacterized protein [Source:UniProtKB/TrEMBL;Acc:F1NGF6]	6.02834	3.58352	2.94682e-11	9.60389e-09	-3.21083	3.58355	0.125637	0.455072	-3.19386	3.58353	0.0271534	0.151786	-7.96969	3.58356	0.000540943	0.0344581	-8.2264	3.58357	0.000170463	0.037326	-1.50563	3.58354	0.505167	0.859215	-8.1011	3.58357	4.73548e-05	0.0154049
ENSGALG00000021856		chr7	17682611	17695850	-	protein_coding	Uncharacterized protein [Source:UniProtKB/TrEMBL;Acc:F1P403]	-1.70991	-0.35562	0.0456649	0.246026	-1.70783	-0.35562	0.045996	0.268355	-0.0956586	-0.35562	1	1	-1.69922	-0.355621	0.0546489	0.378384	2.60005	-0.355621	0.000185816	0.03846	-1.69989	-0.35562	0.0675433	0.367308	0.00263988	-0.355621	1	1
ENSGALG00000003316	FMO3	chr8	4792393	4800086	-	protein_coding	flavin containing monooxygenase 6 pseudogene [Source:RefSeq peptide;Acc:NP_989910]	1.42078	0.182484	0.000539186	0.014816	-0.92709	0.182474	0.106157	0.418741	-0.717321	0.182483	0.0828971	0.308722	-0.22058	0.182469	0.762893	0.975195	-2.29089	0.182465	5.49834e-05	0.0180848	1.57175	0.182476	0.000138241	0.00949662	-1.18427	0.182466	0.0155499	0.214688
ENSGALG00000006804	ODF2L	chr8	14932436	14952372	+	protein_coding	outer dense fiber of sperm tails 2-like [Source:HGNC Symbol;Acc:HGNC:29225]	-3.54129	3.1641	0.0291521	0.189753	-2.15345	3.1641	0.172004	0.535882	0.231101	3.1641	0.710732	0.883495	0.249942	3.16409	0.672618	0.957155	-7.42059	3.16409	3.87517e-05	0.0168515	1.32979	3.1641	0.142717	0.53408	1.27025	3.16409	0.137848	0.687718
ENSGALG00000007361	SS	chr9	14279799	14281333	+	protein_coding	Somatostatin Somatostatin-28 Somatostatin-14 [Source:UniProtKB/Swiss-Prot;Acc:P33094]	-3.94958	0.307218	0.00424706	0.0588126	-0.857463	0.30725	0.671057	0.910421	-4.11093	0.307221	2.85444e-05	0.000956989	-1.76252	0.307268	0.299913	0.79963	5.01052	0.30728	7.08349e-10	2.4817e-06	-2.24062	0.307245	0.184744	0.600208	-3.82448	0.307278	0.00324751	0.0902848
ENSGALG00000008608	FETUB	chr9	15620750	15629885	+	protein_coding	fetuin-B precursor [Source:RefSeq peptide;Acc:NP_001264337]	-1.91329	-0.322192	0.0450541	0.243216	-1.91069	-0.322185	0.0448775	0.26549	-2.04168	-0.322191	0.00204141	0.0236042	0.0485514	-0.322181	0.799488	0.981587	3.73409	-0.322178	1.29534e-07	0.000302548	-1.9034	-0.322186	0.0682319	0.368905	-1.94446	-0.322179	0.0201502	0.247632
ENSGALG00000009437	MECOM	chr9	19449373	19752139	+	protein_coding	MDS1 and EVI1 complex locus [Source:HGNC Symbol;Acc:HGNC:3498]	2.4339	4.56008	1.71783e-13	8.30127e-11	0.781219	4.56008	0.0407867	0.251467	-2.01592	4.56008	1.14172e-07	9.19546e-06	0.814808	4.56009	0.0368223	0.308076	-2.06879	4.56009	4.18139e-05	0.0168515	-1.16676	4.56008	0.01741	0.183475	-4.28991	4.56009	6.01143e-17	4.21221e-13
ENSGALG00000010373	P2RY12	chr9	22992557	22993576	+	protein_coding	purinergic receptor P2Y, G-protein coupled, 12 [Source:HGNC Symbol;Acc:HGNC:18124]	-0.32098	-0.13999	0.812591	0.951349	-0.453435	-0.14	0.672758	0.910921	-1.49865	-0.139991	0.0184746	0.11584	-1.35246	-0.140006	0.135029	0.588274	2.61085	-0.14001	2.77115e-06	0.0029873	-0.943019	-0.139998	0.342561	0.758734	-0.414157	-0.140009	0.633776	0.974019
ENSGALG00000028602		chr13	8824620	8863288	+	protein_coding	Uncharacterized protein [Source:UniProtKB/TrEMBL;Acc:R4GG75]	1.59572	2.29188	0.0813869	0.346309	-1.11576	2.29189	0.518087	0.842668	-0.664951	2.29188	0.577639	0.820249	-2.96538	2.29189	0.0848564	0.471709	-6.80329	2.29189	4.64109e-05	0.0174518	2.22724	2.29189	0.0151448	0.171854	-1.41463	2.29189	0.323421	0.88975
ENSGALG00000012322	KCTD16	chr13	17026764	17061115	+	protein_coding	potassium channel tetramerization domain containing 16 [Source:HGNC Symbol;Acc:HGNC:29244]	-2.23478	-0.25709	0.0217551	0.156514	0.665049	-0.257101	0.366195	0.754458	-2.2452	-0.257091	0.00222563	0.025133	0.100067	-0.257107	0.785537	0.978279	2.97302	-0.257111	6.66005e-05	0.0201014	-2.22328	-0.257099	0.0352775	0.263669	-2.26803	-0.25711	0.00832816	0.152763
ENSGALG00000023740	HBZ	chr14	12090645	12099745	+	protein_coding	Hemoglobin subunit pi [Source:UniProtKB/Swiss-Prot;Acc:P02007]	-1.03889	1.09439	0.408068	0.774136	-5.28277	1.0944	1.31018e-05	0.00162485	0.322703	1.09439	0.601818	0.832958	-2.97521	1.0944	0.0238055	0.241286	2.91049	1.0944	5.6497e-05	0.0180848	-2.09215	1.0944	0.104438	0.458547	-0.810473	1.0944	0.476266	0.950343
ENSGALG00000002242	GALNT9	chr15	2342102	2458959	+	protein_coding	polypeptide N-acetylgalactosaminyltransferase 9 [Source:HGNC Symbol;Acc:HGNC:4131]	-3.80144	4.03065	0.0261562	0.176228	-3.3404	4.03065	0.0493935	0.281273	-2.52359	4.03065	0.030252	0.163688	0.671978	4.03064	0.428003	0.879378	-8.68911	4.03064	3.271e-06	0.00318091	4.34969	4.03065	1.54283e-07	3.86093e-05	-3.71395	4.03064	0.0148379	0.210464
ENSGALG00000004582	MYL2	chr15	6028493	6032632	-	protein_coding	myosin regulatory light chain 2A, cardiac muscle isoform [Source:RefSeq peptide;Acc:NP_001258858]	10.1856	4.92671	2.38896e-32	3.34789e-28	-5.68038	4.92671	0.0209865	0.177386	-7.6817	4.92671	2.70858e-05	0.000925807	-7.97004	4.92671	0.00331716	0.0916898	-9.61423	4.92671	0.000124219	0.0301608	-9.20882	4.92671	0.000949972	0.034942	-8.29739	4.92671	0.00037301	0.0368951
ENSGALG00000000115	HEP21	chr16	174910	176418	+	protein_coding	HEP21 protein precursor [Source:RefSeq peptide;Acc:NP_989852]	-3.56672	0.143445	0.00810947	0.0865833	0.16573	0.143459	0.721079	0.926747	-3.7247	0.143447	9.60131e-05	0.00238146	-3.55145	0.143467	0.00971899	0.151	3.70789	0.143472	2.52246e-05	0.0117833	-3.55484	0.143457	0.0155091	0.17371	-0.0397932	0.143471	1	1
ENSGALG00000001080	NR5A1	chr17	9429011	9444852	-	protein_coding	steroidogenic factor 1 [Source:RefSeq peptide;Acc:NP_990408]	-2.21576	-0.263212	0.0180558	0.139952	-2.21302	-0.263208	0.0181828	0.163238	-0.406734	-0.263211	0.703854	0.881015	-2.20305	-0.263206	0.0224514	0.233581	3.17621	-0.263205	1.03437e-05	0.00616095	-2.20512	-0.263209	0.0295547	0.240243	-0.186785	-0.263205	1	1
ENSGALG00000005504	HNF1B	chr19	8643566	8661541	-	protein_coding	HNF1 homeobox B [Source:HGNC Symbol;Acc:HGNC:11630]	-1.29314	0.516868	0.489603	0.824332	-3.77088	0.517034	0.0225273	0.183866	-0.186021	0.516884	0.964373	0.992666	-4.41081	0.517127	0.00438794	0.103184	3.52453	0.517187	0.00015283	0.0339963	-4.41708	0.517004	0.00752495	0.117695	-0.769339	0.517179	0.675349	0.976745
ENSGALG00000000974	IGSF1	chr20	40715	45256	+	protein_coding	immunoglobulin superfamily member 1 [Source:RefSeq peptide;Acc:NP_001138698]	-2.45659	-0.0495781	0.0426369	0.234044	-2.53815	-0.0495909	0.027113	0.202971	0.211923	-0.0495794	0.716131	0.88671	-2.70671	-0.0495981	0.0178596	0.209443	3.54252	-0.0496028	1.13211e-06	0.00144231	-2.52585	-0.0495886	0.0407739	0.285132	-2.86667	-0.0496021	0.00421836	0.104795
ENSGALG00000005843	EF1A	chr20	9348414	9360272	-	protein_coding	eukaryotic translation elongation factor 1 alpha 2 [Source:RefSeq peptide;Acc:NP_001027570]	2.80154	1.31562	0.00115147	0.0258186	-1.12033	1.31561	0.501324	0.832708	-1.66343	1.31562	0.130261	0.403008	-2.72613	1.31561	0.100496	0.512316	-5.58916	1.31561	0.000211278	0.040536	0.478817	1.31561	0.53292	0.871553	0.0905146	1.31561	0.797375	0.988382
ENSGALG00000020982	BPIFB3	chr20	10656808	10661438	+	protein_coding	BPI fold containing family B, member 3 [Source:HGNC Symbol;Acc:HGNC:16178]	-4.12228	0.386258	0.00526252	0.066325	-4.11826	0.386306	0.00508048	0.0767169	-0.782916	0.386263	0.54438	0.801512	-0.413018	0.386333	0.959662	1	4.09181	0.38635	5.08895e-06	0.00445728	-2.33029	0.386297	0.197144	0.614268	-4.16285	0.386348	0.00143667	0.061098
ENSGALG00000027260	MC3R	chr20	12405996	12406958	-	protein_coding	melanocortin 3 receptor [Source:HGNC Symbol;Acc:HGNC:6931]	-2.67283	-0.150287	0.013574	0.117477	-2.67009	-0.150305	0.0134902	0.137561	-0.578078	-0.150289	0.599115	0.831731	-2.65988	-0.150315	0.0166226	0.201862	3.47157	-0.150321	8.33743e-06	0.00584204	-2.66084	-0.150302	0.023535	0.214736	-0.253986	-0.15032	0.959458	1
ENSGALG00000028065	C2	chr23	1766599	1777774	-	protein_coding	complement component 2 [Source:HGNC Symbol;Acc:HGNC:1248]	-1.2252	0.0659837	0.121208	0.434682	0.254336	0.0660267	0.643316	0.896008	-0.585511	0.0659879	0.337898	0.653326	0.368658	0.0660507	0.521186	0.921512	2.14495	0.0660665	0.000108499	0.0286888	-2.25543	0.0660189	0.00575804	0.102014	-1.17174	0.0660642	0.0959551	0.59712
ENSGALG00000025817	NHLH1	chr25	1195012	1199650	+	protein_coding	helix-loop-helix protein 1 [Source:RefSeq peptide;Acc:NP_989452]	-7.52344	4.6806	2.40985e-05	0.00140131	-3.56677	4.68059	0.0210504	0.177711	-5.07341	4.68059	1.69998e-05	0.000643878	1.10806	4.68059	0.200449	0.693547	-7.32465	4.68059	4.12513e-05	0.0168515	4.03215	4.68059	1.92119e-07	4.56331e-05	-1.48377	4.68059	0.246558	0.840549
ENSGALG00000000299	PKP1	chr26	807346	844130	-	protein_coding	plakophilin 1 [Source:HGNC Symbol;Acc:HGNC:9023]	-2.57446	-0.201425	0.0227165	0.160783	-2.56892	-0.201314	0.0223264	0.182978	-2.72415	-0.201414	0.000611848	0.00937097	-2.55556	-0.201252	0.0268261	0.25921	5.20968	-0.201211	3.2263e-16	4.52133e-12	-2.56817	-0.201334	0.0378118	0.274458	-2.61085	-0.201217	0.00872823	0.157336
ENSGALG00000027305	SKAP1	chr27	3711055	3815879	+	protein_coding	src kinase associated phosphoprotein 1 [Source:HGNC Symbol;Acc:HGNC:15605]	-0.659465	0.336292	0.77077	0.940392	-0.916505	0.336314	0.644564	0.896478	-4.16778	0.336294	2.79528e-05	0.000943928	-3.9904	0.336326	0.00521378	0.112548	3.89441	0.336334	7.24828e-06	0.00534618	0.0820251	0.33631	0.773242	0.958651	-4.04644	0.336333	0.00109751	0.0545921
ENSGALG00000015154	TRPM6	chrZ	36568084	36656370	-	protein_coding	transient receptor potential cation channel, subfamily M, member 6 [Source:HGNC Symbol;Acc:HGNC:17995]	0.210553	2.07698	0.703133	0.919059	-0.671891	2.07697	0.740404	0.934794	0.791652	2.07698	0.314379	0.636111	0.067108	2.07697	0.78725	0.978826	-6.54991	2.07697	5.81154e-05	0.0180984	-0.425426	2.07697	0.898034	0.987449	0.609107	2.07697	0.44736	0.942753
ENSGALG00000015290	LIX1	chrZ	51375633	51406317	+	protein_coding	Protein limb expression 1 [Source:UniProtKB/Swiss-Prot;Acc:Q8UVV7]	0.859438	2.92729	0.277511	0.659814	0.549663	2.92728	0.459825	0.810077	2.05172	2.92729	0.00301802	0.0311922	-2.86163	2.92728	0.0447219	0.336772	-6.30206	2.92728	4.91642e-05	0.0174518	-6.21374	2.92728	9.43364e-05	0.00702151	-1.95629	2.92728	0.0975835	0.600712
ENSGALG00000001840	TEK	chrZ	68386224	68425628	+	protein_coding	TEK tyrosine kinase, endothelial [Source:HGNC Symbol;Acc:HGNC:11724]	-0.514009	2.51779	0.249372	0.627751	3.26058	2.51779	4.03482e-32	5.6544e-28	-0.0763991	2.51779	0.832126	0.93737	-2.22151	2.5178	5.73846e-06	0.00146216	-2.50546	2.5178	1.82245e-07	0.000319247	-2.6454	2.51779	1.17097e-07	2.98363e-05	-2.32001	2.5178	8.47522e-08	0.000131969
ENSGALG00000007458	HBZ	chr14_AADN03010587_random	7843	9971	+	protein_coding	Hemoglobin subunit pi [Source:UniProtKB/Swiss-Prot;Acc:P02007]	-0.637089	0.592173	0.611619	0.885915	-4.48577	0.59218	3.1642e-05	0.00305547	0.264833	0.592173	0.64508	0.85351	-3.74828	0.592183	0.00119163	0.0520235	2.88344	0.592186	2.36702e-05	0.0117833	-1.98166	0.592178	0.0942586	0.436674	-0.89659	0.592186	0.385456	0.917917
ENSGALG00000007468	HBAA	chr14_AADN03010595_random	5125	5931	-	protein_coding	Gallus gallus hemoglobin, alpha 1 (HBAA), mRNA. [Source:RefSeq mRNA;Acc:NM_001004376]	-2.15086	0.484019	0.0731511	0.326166	-3.88481	0.484006	0.00070585	0.0260411	3.39638	0.484018	5.19189e-09	6.27234e-07	0.683477	0.483999	0.353619	0.834003	-4.28045	0.483994	8.5712e-05	0.0235886	-4.27267	0.484009	0.000168463	0.011136	-4.17217	0.483995	3.17388e-05	0.0109862

## Sheet: HH13_trailers_v_all_other_inviv
ensid	Name	Chr	Start	End	Strand	Biotype	Description	HH15_Invasive_Front_v_other.log2fc	HH15_Invasive_Front_v_other.log2cpm	HH15_Invasive_Front_v_other.pval	HH15_Invasive_Front_v_other.padj	HH13_Invasive_Front_v_other.log2fc	HH13_Invasive_Front_v_other.log2cpm	HH13_Invasive_Front_v_other.pval	HH13_Invasive_Front_v_other.padj	HH11_Invasive_Front_v_other.log2fc	HH11_Invasive_Front_v_other.log2cpm	HH11_Invasive_Front_v_other.pval	HH11_Invasive_Front_v_other.padj	HH15_Leader_v_other.log2fc	HH15_Leader_v_other.log2cpm	HH15_Leader_v_other.pval	HH15_Leader_v_other.padj	HH13_Leader_v_other.log2fc	HH13_Leader_v_other.log2cpm	HH13_Leader_v_other.pval	HH13_Leader_v_other.padj	HH15_Trailer_v_other.log2fc	HH15_Trailer_v_other.log2cpm	HH15_Trailer_v_other.pval	HH15_Trailer_v_other.padj	HH13_Trailer_v_other.log2fc	HH13_Trailer_v_other.log2cpm	HH13_Trailer_v_other.pval	HH13_Trailer_v_other.padj
ENSGALG00000023986		chr1	111201	113665	-	protein_coding	Uncharacterized protein [Source:UniProtKB/TrEMBL;Acc:F1P0H2]	-1.91217	-0.139646	0.0889457	0.365217	-1.1591	-0.139639	0.374439	0.759832	-1.64974	-0.139646	0.0547263	0.241478	0.153789	-0.139635	0.747254	0.974676	-1.27296	-0.139633	0.288701	0.88259	-2.71562	-0.139641	0.0113503	0.147543	3.10298	-0.139633	7.13753e-06	0.00500127
ENSGALG00000006833	ITIH2	chr1	4053533	4127906	+	protein_coding	inter-alpha-trypsin inhibitor heavy chain H2 precursor [Source:RefSeq peptide;Acc:NP_001124213]	-0.131445	-0.0200883	1	1	-2.2698	-0.0200995	0.0352552	0.231847	-0.278852	-0.0200893	0.808583	0.928879	1.29603	-0.0201058	0.095005	0.499626	0.911014	-0.0201099	0.227864	0.828503	0.643231	-0.0200975	0.384155	0.791127	-3.14887	-0.0201093	0.000341258	0.0359578
ENSGALG00000008635		chr1	20126933	20130565	-	protein_coding	Uncharacterized protein [Source:UniProtKB/TrEMBL;Acc:F1NLQ7]	3.69167	6.65201	2.96665e-05	0.00166966	-0.0163403	6.65201	0.842097	0.968657	-9.68937	6.65201	1.0438e-09	1.53977e-07	1.05981	6.65201	0.258487	0.761373	-10.2482	6.65201	6.56396e-06	0.00511041	-10.9922	6.65201	3.53732e-06	0.000505836	-8.78939	6.65201	6.75156e-06	0.00497981
ENSGALG00000010029	BEST3	chr1	35488978	35512697	-	protein_coding	bestrophin-3 [Source:RefSeq peptide;Acc:NP_001186598]	2.65538	0.407886	1.04337e-06	0.000105955	0.881985	0.407921	0.15328	0.506382	-2.37867	0.40789	0.000212488	0.00428423	-2.22651	0.407941	0.0143151	0.186442	-2.39733	0.407954	0.00564467	0.155889	0.677478	0.407915	0.273758	0.700976	-2.89792	0.407952	0.000336393	0.0359484
ENSGALG00000010208	CAPS2	chr1	37663436	37692817	-	protein_coding	calcyphosine 2 [Source:HGNC Symbol;Acc:HGNC:16471]	-5.67202	1.55254	0.000275928	0.00905587	-1.8852	1.55253	0.229417	0.614324	-2.22835	1.55254	0.0431118	0.206978	0.147849	1.55252	0.738282	0.97284	-4.00787	1.55252	0.0138936	0.234868	0.294209	1.55253	0.645478	0.914264	3.15107	1.55252	8.74453e-05	0.0200895
ENSGALG00000010935	PTPRQ	chr1	39799901	39912354	+	protein_coding	protein tyrosine phosphatase, receptor type, Q [Source:HGNC Symbol;Acc:HGNC:9679]	-2.5309	-0.0369717	0.0921056	0.372301	-3.05484	-0.0369834	0.00964323	0.112711	0.384542	-0.0369729	0.584542	0.824538	-3.04396	-0.0369899	0.0119506	0.168487	-3.05335	-0.0369942	0.0108827	0.205599	-2.72303	-0.0369813	0.0681029	0.368625	3.19009	-0.0369935	5.93576e-05	0.0164213
ENSGALG00000011271	LUM	chr1	43860883	43872867	-	protein_coding	Lumican [Source:UniProtKB/Swiss-Prot;Acc:P51890]	1.10652	6.76746	0.113998	0.420968	1.88712	6.76746	0.0060933	0.0847138	-0.0576141	6.76746	0.999901	1	-0.0447002	6.76746	0.917511	0.999456	-2.23565	6.76746	0.0413733	0.387339	-1.71869	6.76746	0.118423	0.484831	-4.67553	6.76746	2.58502e-05	0.0109777
ENSGALG00000012178	PDGFB	chr1	50582287	50594411	+	protein_coding	platelet-derived growth factor subunit B precursor [Source:RefSeq peptide;Acc:NP_989601]	2.90644	0.382965	0.000922514	0.0218757	0.530297	0.383009	0.502933	0.833588	-2.60778	0.38297	0.0188504	0.117513	0.954325	0.383034	0.292302	0.792631	-4.10721	0.38305	0.00280352	0.120517	-2.06465	0.383001	0.23166	0.655457	-4.1523	0.383047	0.000576623	0.0425305
ENSGALG00000012288	SLC16A8	chr1	50865712	50873377	+	protein_coding	Monocarboxylate transporter 3 [Source:UniProtKB/Swiss-Prot;Acc:Q90632]	-2.61352	-0.169984	0.0168813	0.134954	-2.61041	-0.169979	0.0167006	0.155744	0.355678	-0.169984	0.593175	0.82975	-2.59982	-0.169976	0.0202988	0.223112	-2.60882	-0.169974	0.018704	0.265053	-2.60239	-0.16998	0.0288373	0.237163	3.12831	-0.169975	5.2495e-05	0.0161971
ENSGALG00000012542	RASD2	chr1	51881968	51884335	-	protein_coding	RASD family, member 2 [Source:HGNC Symbol;Acc:HGNC:18229]	-0.81517	0.367765	0.670405	0.90791	-4.0502	0.367747	0.00330712	0.0620563	4.6079	0.367764	6.66556e-10	1.08618e-07	-4.03844	0.367737	0.00426989	0.102113	-4.04936	0.367731	0.0037849	0.137198	-4.0415	0.367751	0.0069772	0.112954	-4.0942	0.367732	0.00084324	0.0494442
ENSGALG00000028186	RERG	chr1	62779916	62887409	-	protein_coding	RAS-like, estrogen-regulated, growth inhibitor [Source:HGNC Symbol;Acc:HGNC:15980]	-0.270794	2.55953	0.748428	0.933367	0.723117	2.55952	0.180673	0.551005	-3.14974	2.55953	1.19289e-07	9.4984e-06	2.37405	2.55952	2.36245e-06	0.000752442	-0.799749	2.55951	0.28147	0.87656	0.421592	2.55952	0.426536	0.818806	-2.84456	2.55951	6.81796e-05	0.0173722
ENSGALG00000011930		chr1	75817331	75854119	-	protein_coding	Uncharacterized protein [Source:UniProtKB/TrEMBL;Acc:F1NEW8]	-0.577952	1.46332	0.832221	0.958355	0.760598	1.46334	0.395385	0.772097	1.77177	1.46332	0.0402	0.197118	-5.78063	1.46334	0.000770703	0.0425222	0.504443	1.46335	0.528324	0.966763	-1.75	1.46333	0.353446	0.767461	-5.83956	1.46335	9.06842e-05	0.02046
ENSGALG00000014988	POPDC2	chr1	79597189	79606955	+	protein_coding	popeye domain-containing protein 2 [Source:RefSeq peptide;Acc:NP_996747]	2.84098	2.20076	0.00178753	0.0336346	1.82864	2.20081	0.0538257	0.292824	-2.79852	2.20077	0.0212259	0.1282	-2.03482	2.20083	0.258499	0.761373	-1.39601	2.20085	0.428492	0.937595	-2.58492	2.2008	0.146414	0.539532	-6.59075	2.20084	3.03259e-05	0.0109862
ENSGALG00000014997	PLA1A	chr1	79608386	79625612	-	protein_coding	phospholipase A1 member A [Source:HGNC Symbol;Acc:HGNC:17661]	-3.24797	0.859488	0.0547666	0.274009	1.95176	0.859516	0.04093	0.251907	2.23128	0.859491	0.00743867	0.0612488	-1.98605	0.859532	0.265564	0.766317	-4.93784	0.859542	0.00140596	0.0950667	-4.5386	0.859511	0.0107932	0.142963	-4.98395	0.85954	0.000245179	0.0329328
ENSGALG00000015358	myosin	chr1	86879998	86923778	-	protein_coding	myosin heavy chain, cardiac muscle isoform [Source:RefSeq peptide;Acc:NP_990097]	6.06334	6.20652	4.36631e-30	3.05947e-26	-2.57961	6.20652	0.0200859	0.173435	-2.90246	6.20652	0.000429857	0.00720576	-4.34933	6.20652	0.000558138	0.0347633	-5.19653	6.20652	4.20868e-05	0.0168515	-4.23789	6.20652	0.000621472	0.0268774	-3.76838	6.20652	0.000357425	0.0365617
ENSGALG00000015395		chr1	88084658	88092055	+	protein_coding	Uncharacterized protein [Source:UniProtKB/TrEMBL;Acc:E1C4A0]	-2.81252	-0.113499	0.0119538	0.10943	-1.72701	-0.113503	0.196652	0.572115	0.204962	-0.113499	0.718672	0.888215	-2.79883	-0.113506	0.0146363	0.187966	-2.80781	-0.113507	0.0133422	0.231122	-2.8008	-0.113502	0.0211334	0.20313	3.19934	-0.113507	3.13986e-05	0.0109862
ENSGALG00000028416		chr1	88859673	88860818	+	protein_coding	Uncharacterized protein [Source:UniProtKB/TrEMBL;Acc:R4GGF9]	-1.67106	0.0250765	0.203124	0.566956	1.38913	0.0250935	0.0896917	0.38043	0.612695	0.0250781	0.365597	0.676366	-0.617624	0.0251029	0.721383	0.970634	-3.25183	0.0251091	0.00294379	0.122345	1.34885	0.0250904	0.104349	0.458547	-3.29493	0.0251082	0.000596029	0.0434461
ENSGALG00000019211	MAEL	chr1	91188528	91198039	-	protein_coding	maelstrom spermatogenic transposon silencer [Source:HGNC Symbol;Acc:HGNC:25929]	0.505912	0.661083	0.524243	0.8403	0.888671	0.661082	0.325852	0.720493	-0.654611	0.661083	0.609617	0.836664	1.55381	0.661081	0.108509	0.534499	-4.39217	0.66108	0.00556962	0.155889	0.499863	0.661082	0.527873	0.86912	-4.64789	0.66108	0.000425835	0.0382137
ENSGALG00000015662	LIPI	chr1	97342196	97364220	-	protein_coding	lipase, member I [Source:HGNC Symbol;Acc:HGNC:18821]	-1.95305	-0.313877	0.0397331	0.225616	-1.95074	-0.31388	0.0396436	0.247468	-2.08204	-0.313877	0.00161837	0.0197216	-1.94163	-0.313881	0.0469101	0.346181	-1.94848	-0.313882	0.0436662	0.397879	1.4809	-0.313879	0.0658589	0.362651	2.5488	-0.313882	0.00043857	0.0382137
ENSGALG00000025730	RIPPLY3	chr1	106360956	106367003	+	protein_coding	ripply transcriptional repressor 3 [Source:HGNC Symbol;Acc:HGNC:3047]	-1.74833	2.17892	0.322365	0.704009	-0.65019	2.17891	0.794328	0.956004	-2.62215	2.17892	0.0352081	0.180471	-1.57632	2.1789	0.409311	0.868584	-3.2043	2.1789	0.0749925	0.534288	-6.65874	2.17891	0.000403458	0.0200499	4.18741	2.1789	6.90646e-07	0.000744516
ENSGALG00000016228	NYX	chr1	111334091	111336368	-	protein_coding	nyctalopin [Source:HGNC Symbol;Acc:HGNC:8082]	-2.26597	-0.151403	0.0644876	0.301745	-2.67032	-0.151414	0.0132611	0.135805	0.715246	-0.151404	0.323732	0.643424	-2.65998	-0.15142	0.0163601	0.200401	-2.66844	-0.151423	0.0149032	0.242289	-2.6614	-0.151412	0.0231437	0.213385	2.78901	-0.151423	0.000266292	0.0333198
ENSGALG00000016288	IL1RAPL1	chr1	115540657	115874541	-	protein_coding	interleukin 1 receptor accessory protein-like 1 [Source:HGNC Symbol;Acc:HGNC:5996]	-5.50783	1.2502	0.000159197	0.00610079	0.688226	1.25021	0.405596	0.776823	1.05162	1.2502	0.178815	0.47641	0.177967	1.25021	0.717014	0.970487	-1.18519	1.25022	0.461304	0.947505	1.14865	1.25021	0.199683	0.617467	-4.85498	1.25022	0.000454127	0.0383626
ENSGALG00000016562	ASB11	chr1	121483020	121494829	+	protein_coding	ankyrin repeat and SOCS box containing 11, E3 ubiquitin protein ligase [Source:HGNC Symbol;Acc:HGNC:17186]	-2.27309	-0.248631	0.0256039	0.174181	-1.62811	-0.248642	0.174286	0.539171	-2.41022	-0.248632	0.000736566	0.0108086	-2.26108	-0.248648	0.0305169	0.277885	-2.26842	-0.248653	0.028265	0.319562	0.136878	-0.24864	0.743252	0.948513	3.56562	-0.248652	3.57219e-07	0.000417172
ENSGALG00000016750	VWA3B	chr1	131334588	131405083	-	protein_coding	von Willebrand factor A domain containing 3B [Source:HGNC Symbol;Acc:HGNC:28385]	1.87126	0.712167	0.0431656	0.236021	-1.39193	0.71216	0.414839	0.783604	-1.37716	0.712167	0.236761	0.551982	2.33088	0.712155	0.0125919	0.174026	-4.68664	0.712152	0.00139483	0.0950667	-0.670999	0.712161	0.773247	0.958651	-4.73244	0.712153	0.000241137	0.0329328
ENSGALG00000016805	SULT1C	chr1	135521670	135527319	+	protein_coding	sulfotransferase 1C1 [Source:RefSeq peptide;Acc:NP_989932]	-4.836	0.794916	0.00205911	0.0368174	2.15799	0.794932	0.0266911	0.200785	2.2548	0.794917	0.00850124	0.0669306	-4.81974	0.794941	0.00262928	0.079734	-4.83157	0.794947	0.00229288	0.110927	-4.82365	0.794929	0.0045563	0.0898059	-4.87755	0.794946	0.000455404	0.0383626
ENSGALG00000016907	KLHL1	chr1	156898969	157114305	+	protein_coding	kelch-like family member 1 [Source:HGNC Symbol;Acc:HGNC:6352]	-2.86553	0.153422	0.0463717	0.248225	-3.56904	0.153398	0.00429966	0.0709723	-0.911944	0.15342	0.402503	0.70619	-3.55772	0.153385	0.00554125	0.115652	-1.98508	0.153376	0.178146	0.75975	-0.131431	0.153403	1	1	3.51325	0.153378	8.17278e-06	0.00545397
ENSGALG00000016934		chr1	161176976	161182699	+	protein_coding	Uncharacterized protein [Source:UniProtKB/TrEMBL;Acc:F1NY34]	-5.2207	1.0485	0.00116656	0.0260322	-5.21666	1.04851	0.00114195	0.0355629	0.767846	1.0485	0.357537	0.669928	0.115853	1.04851	0.750205	0.974676	-5.21631	1.04851	0.00131566	0.0932898	3.00135	1.04851	0.0014794	0.0470122	-5.10226	1.04851	0.000658386	0.0447894
ENSGALG00000026781	ALOX5AP	chr1	174335143	174344760	-	protein_coding	arachidonate 5-lipoxygenase-activating protein [Source:RefSeq peptide;Acc:NP_001265073]	-1.10908	-0.072111	0.0820308	0.34762	-1.09875	-0.0721167	0.117322	0.439493	-0.895657	-0.0721116	0.0531884	0.237307	-1.77611	-0.0721199	0.0075635	0.132945	-1.44353	-0.072122	0.0191202	0.266883	-0.0305798	-0.0721157	1	1	2.62124	-0.0721217	6.1238e-13	2.86063e-09
ENSGALG00000017091	FLT1	chr1	175084526	175185951	+	protein_coding	vascular endothelial growth factor receptor 1 precursor [Source:RefSeq peptide;Acc:NP_989583]	0.972387	1.91213	0.303387	0.688528	3.51041	1.91213	0.000169856	0.00959823	-1.23566	1.91213	0.330746	0.648625	-1.85324	1.91212	0.34675	0.829562	-5.73314	1.91212	0.00476497	0.149884	-6.123	1.91213	0.0021373	0.0564069	-6.24373	1.91212	0.000156924	0.0271498
ENSGALG00000017102	GPR12	chr1	175735854	175736852	+	protein_coding	G protein-coupled receptor 12 [Source:HGNC Symbol;Acc:HGNC:4466]	-2.22347	0.201804	0.108372	0.409691	0.683345	0.201818	0.400367	0.77442	1.85855	0.201806	0.0145286	0.0978067	-2.68046	0.201826	0.0552912	0.380949	-0.0609346	0.201831	1	1	-0.116569	0.201816	1	1	-3.74843	0.20183	0.00056919	0.0425305
ENSGALG00000017150	ARHGAP20	chr1	178739748	178801405	+	protein_coding	Rho GTPase activating protein 20 [Source:HGNC Symbol;Acc:HGNC:18357]	-0.456621	0.321633	0.873676	0.970481	1.54535	0.321621	0.0893857	0.379591	1.23905	0.321632	0.119139	0.38329	0.568568	0.321614	0.479105	0.903171	-3.95556	0.32161	0.00306277	0.124051	-3.65426	0.321623	0.0133891	0.161198	-4.00024	0.321611	0.000642717	0.0447894
ENSGALG00000017250	ANKRD42	chr1	188353668	188368089	+	protein_coding	ankyrin repeat domain 42 [Source:HGNC Symbol;Acc:HGNC:26752]	0.135586	1.46319	0.755844	0.935203	-1.41901	1.46319	0.346754	0.736611	0.638634	1.46319	0.388599	0.695952	0.534838	1.46318	0.492347	0.911732	-0.137163	1.46318	1	1	0.962156	1.46319	0.265771	0.691774	-4.74112	1.46318	0.000620145	0.0438925
ENSGALG00000004754	OBSCN	chr2	2080439	2253956	-	protein_coding	obscurin, cytoskeletal calmodulin and titin-interacting RhoGEF [Source:HGNC Symbol;Acc:HGNC:15719]	4.67492	1.6931	7.40983e-07	8.35599e-05	-6.09163	1.69313	0.00128475	0.037984	-5.25322	1.6931	0.000343776	0.00609061	-1.36312	1.69314	0.559246	0.930051	0.240533	1.69315	0.678483	0.984229	-5.85928	1.69312	0.00650186	0.108602	-6.13833	1.69315	0.000261786	0.0331829
ENSGALG00000006025	XIRP1	chr2	4944068	4977259	-	protein_coding	xin actin-binding repeat-containing protein 1 [Source:RefSeq peptide;Acc:NP_989679]	7.42324	2.1263	5.80352e-16	4.28055e-13	-2.30304	2.12633	0.302332	0.700659	-6.66768	2.1263	1.57e-05	0.000606116	-5.92269	2.12635	0.00962673	0.150256	-6.61868	2.12637	0.00171565	0.10301	-6.61043	2.12633	0.00392744	0.0819676	-6.66571	2.12636	0.000324303	0.0359484
ENSGALG00000025919	BAMBI	chr2	15230158	15236740	-	protein_coding	BMP and activin membrane-bound inhibitor homolog precursor [Source:RefSeq peptide;Acc:NP_001182330]	2.61887	6.74135	4.13555e-11	1.2599e-08	0.596056	6.74135	0.192058	0.565093	-2.03026	6.74135	1.33556e-05	0.000528718	0.0952828	6.74135	0.783737	0.978153	-2.28083	6.74135	0.000303828	0.0512611	-0.575538	6.74135	0.342393	0.758566	-2.11312	6.74135	0.000179893	0.0280234
ENSGALG00000007426	MKX	chr2	15606690	15649798	+	protein_coding	mohawk homeobox [Source:HGNC Symbol;Acc:HGNC:23729]	-3.5879	0.240224	0.00775484	0.0845043	-3.40675	0.240207	0.0149306	0.146116	-0.764768	0.240222	0.489384	0.76851	3.11874	0.240198	0.000261463	0.0224794	1.32642	0.240191	0.134635	0.680841	-3.76795	0.24021	0.00566758	0.100978	-3.82	0.240192	0.000668876	0.0452832
ENSGALG00000009512	TFPI2	chr2	23431045	23434937	-	protein_coding	tissue factor pathway inhibitor 2 [Source:HGNC Symbol;Acc:HGNC:11761]	2.23059	0.323098	0.00802709	0.0864656	0.0953918	0.323107	0.781113	0.952306	-4.13406	0.323099	2.55972e-06	0.000133353	1.27045	0.323112	0.145882	0.611903	-0.788424	0.323115	0.625462	0.980011	-0.171573	0.323105	1	1	-4.01291	0.323115	0.000251474	0.0329328
ENSGALG00000027247	EOMES	chr2	39178222	39184075	-	protein_coding	eomesodermin [Source:HGNC Symbol;Acc:HGNC:3372]	-4.10262	0.393988	0.00309513	0.0480345	-3.47119	0.393961	0.0221921	0.182654	-0.014422	0.393985	1	1	1.94831	0.393946	0.0395547	0.318392	2.15269	0.393937	0.0201285	0.273567	-3.64311	0.393966	0.0245822	0.218727	-4.14301	0.393938	0.000758882	0.0471684
ENSGALG00000012151	TBX20	chr2	47818323	47850665	+	protein_coding	T-box transcription factor TBX20 [Source:UniProtKB/Swiss-Prot;Acc:Q8UW76]	4.34258	0.914133	9.97082e-07	0.000101993	0.45781	0.914354	0.560638	0.862357	-1.98062	0.914155	0.111814	0.368185	-5.07997	0.914478	0.00207864	0.0698423	-4.87676	0.914558	0.00443997	0.144366	-5.08574	0.914314	0.0036893	0.0788137	-5.13929	0.914547	0.000338604	0.0359484
ENSGALG00000012735	EDN1	chr2	62756871	62762088	-	protein_coding	endothelin 1 [Source:HGNC Symbol;Acc:HGNC:3176]	2.75603	4.2876	0.000785193	0.0196144	1.09904	4.28759	0.199029	0.576755	-1.44658	4.2876	0.158581	0.447693	-0.0186446	4.28759	0.855798	0.987672	-1.58705	4.28759	0.281442	0.87656	-8.72558	4.28759	2.31759e-06	0.000345519	-5.15037	4.28759	0.00048172	0.039249
ENSGALG00000026606	ADTRP	chr2	62969015	63001170	+	protein_coding	androgen-dependent TFPI-regulating protein [Source:HGNC Symbol;Acc:HGNC:21214]	-0.26685	-0.0102083	0.961172	1	-2.22161	-0.01021	0.0666608	0.329169	1.84651	-0.0102085	0.00736361	0.0608972	0.394442	-0.0102109	0.565885	0.931083	-0.586472	-0.0102115	0.721499	0.988472	-0.455756	-0.0102097	0.846473	0.972987	-3.18268	-0.0102114	0.000726245	0.0466819
ENSGALG00000019553	SERPINB10	chr2	67745615	67751998	-	protein_coding	Heterochromatin-associated protein MENT [Source:UniProtKB/Swiss-Prot;Acc:O73790]	-1.94933	-0.32447	0.0352788	0.211733	0.322198	-0.324392	0.607418	0.882294	-1.83285	-0.324463	0.0125207	0.0881734	-1.93079	-0.324349	0.0428652	0.331519	0.612253	-0.32432	0.416163	0.934147	-1.94539	-0.324407	0.0535068	0.325263	2.52158	-0.324324	0.000820928	0.0487478
ENSGALG00000019552	SERPINB2	chr2	67753130	67763712	-	protein_coding	serpin peptidase inhibitor, clade B (ovalbumin), member 2 [Source:HGNC Symbol;Acc:HGNC:8584]	-1.56208	-0.387392	0.0839763	0.352542	-1.55483	-0.387304	0.085534	0.371336	-1.68586	-0.387384	0.00628648	0.0542888	-1.54106	-0.387255	0.0986497	0.508769	1.07683	-0.387223	0.17881	0.760812	-1.563	-0.38732	0.115702	0.480143	2.66893	-0.387228	0.000298381	0.0357718
ENSGALG00000012906	CDH20	chr2	68541077	68785639	-	protein_coding	cadherin-20 precursor [Source:RefSeq peptide;Acc:NP_989465]	-4.71611	0.72767	0.00287245	0.0459002	-4.71219	0.727662	0.00278166	0.0564143	4.76295	0.72767	4.65547e-09	5.7736e-07	-4.70007	0.727657	0.00356672	0.0946667	-0.681324	0.727654	0.792991	0.991713	-4.70366	0.727664	0.00621227	0.106052	-4.75751	0.727655	0.000681931	0.0455075
ENSGALG00000013079	ABCA13	chr2	79980293	80095740	+	protein_coding	ATP-binding cassette, sub-family A (ABC1), member 13 [Source:HGNC Symbol;Acc:HGNC:14638]	1.51024	1.49015	0.131049	0.452891	-1.03502	1.4902	0.637857	0.89434	-5.88049	1.49016	6.25205e-06	0.000281724	2.98827	1.49023	0.0026173	0.079734	-5.08015	1.49024	0.00822261	0.182329	-0.136758	1.49019	1	1	-5.88453	1.49024	0.000169396	0.0276037
ENSGALG00000028682	CBLN2	chr2	92627800	92630335	+	protein_coding	cerebellin-2 precursor [Source:RefSeq peptide;Acc:NP_001165239]	1.85263	0.168221	0.0240343	0.166877	0.981689	0.168215	0.229501	0.614324	0.311761	0.16822	0.623438	0.842786	-2.14794	0.168212	0.11002	0.537188	-1.58752	0.16821	0.238447	0.837701	-0.764623	0.168216	0.641715	0.912746	-3.65712	0.16821	0.000327035	0.0359484
ENSGALG00000022875		chr2	97952712	97956997	-	protein_coding	Uncharacterized protein [Source:UniProtKB/TrEMBL;Acc:E1C107]	1.15269	-0.0215265	0.13599	0.462838	0.73968	-0.0215503	0.326538	0.721058	-1.54911	-0.0215288	0.0777502	0.29734	-2.86146	-0.0215636	0.0109708	0.161327	-2.50331	-0.0215723	0.0308942	0.336065	2.28166	-0.021546	0.0027115	0.066013	-3.13825	-0.0215711	0.00057062	0.0425305
ENSGALG00000014847	MYOM1	chr2	100573569	100647380	+	protein_coding	myomesin-1 [Source:RefSeq peptide;Acc:NP_990290]	6.21828	3.22529	4.30016e-12	1.54519e-09	-2.74191	3.22531	0.186628	0.558848	-2.63711	3.22529	0.0624195	0.261452	-3.94556	3.22532	0.0754314	0.44267	-7.46727	3.22533	0.000941192	0.0847071	-4.33507	3.22531	0.0511111	0.317486	-7.17449	3.22533	0.000384872	0.037081
ENSGALG00000015404		chr2	110878688	110899609	-	protein_coding	Uncharacterized protein [Source:UniProtKB/TrEMBL;Acc:F1N8T5]	0.346119	1.71028	0.616548	0.888156	1.20979	1.7103	0.19097	0.564849	-0.794772	1.71028	0.506537	0.778372	1.15472	1.71032	0.217146	0.713334	-0.654663	1.71033	0.774563	0.99167	0.104332	1.7103	0.763614	0.954937	-5.3773	1.71033	0.000814471	0.0485702
ENSGALG00000015520	TRIM55	chr2	114674302	114710966	+	protein_coding	tripartite motif-containing protein 55 [Source:RefSeq peptide;Acc:NP_001186333]	5.22357	2.21679	3.26639e-08	5.72189e-06	-0.588122	2.21683	0.890687	0.982579	-6.77338	2.21679	5.69477e-06	0.000263249	-1.0961	2.21686	0.682731	0.958793	-6.72682	2.21687	0.00100664	0.0869923	-6.71858	2.21683	0.0023284	0.0597464	-6.60236	2.21687	0.000423265	0.0382137
ENSGALG00000015558	CPA6	chr2	115185937	115273389	-	protein_coding	carboxypeptidase A6 [Source:RefSeq peptide;Acc:NP_001006344]	-3.17974	0.00380791	0.00786265	0.0853502	-3.17645	0.0037918	0.00777206	0.0975572	-2.12544	0.00380634	0.035542	0.181849	0.947436	0.00378281	0.279511	0.781819	-0.96923	0.00377694	0.633859	0.980375	-3.16774	0.00379473	0.0146223	0.169203	3.12175	0.00377779	0.000107185	0.0224193
ENSGALG00000027719	ODF1	chr2	128979715	128983749	+	protein_coding	outer dense fiber of sperm tails 1 [Source:HGNC Symbol;Acc:HGNC:8113]	-3.5734	0.238088	0.00714467	0.0803574	1.00359	0.238072	0.245754	0.637536	1.42095	0.238086	0.0655278	0.269657	0.3217	0.238064	0.62421	0.946779	-0.302474	0.238058	0.966715	1	-1.03225	0.238075	0.528008	0.869128	-3.81601	0.238059	0.000592536	0.0434461
ENSGALG00000016111	CSMD3	chr2	132812344	133381395	-	protein_coding	CUB and Sushi multiple domains 3 [Source:HGNC Symbol;Acc:HGNC:19291]	-3.45363	2.15618	2.30732e-07	3.05045e-05	1.58374	2.15618	0.000331526	0.0153333	0.470287	2.15618	0.21951	0.532221	-2.55745	2.15618	0.000152148	0.0161531	1.41506	2.15619	0.00159589	0.0989591	-1.23786	2.15618	0.0471509	0.306195	-2.06435	2.15619	0.00026283	0.0331829
ENSGALG00000016360	ANXA13	chr2	137709300	137734052	-	protein_coding	annexin A13 [Source:RefSeq peptide;Acc:NP_001186430]	-2.64784	-0.200101	0.0187483	0.14392	0.616927	-0.199899	0.451175	0.804556	-2.80257	-0.200081	0.000422017	0.00711683	-2.62507	-0.199787	0.0224681	0.233581	-1.90775	-0.199713	0.169264	0.74605	-2.64475	-0.199936	0.031492	0.249338	3.64388	-0.199724	5.58244e-06	0.00434624
ENSGALG00000026747	GTF2A1L	chr3	7528251	7539974	-	protein_coding	TFIIA-alpha and beta-like factor [Source:RefSeq peptide;Acc:NP_001191795]	0.385788	0.869939	0.590546	0.877454	0.0993659	0.869947	0.772643	0.94936	1.58439	0.86994	0.0502491	0.228856	-4.93599	0.869951	0.000926706	0.0452504	0.9462	0.869954	0.287519	0.88259	-3.72325	0.869945	0.0257471	0.223834	-4.82949	0.869953	0.000364547	0.0368951
ENSGALG00000029057	VSX1	chr3	15398038	15402660	-	protein_coding	visual system homeobox 1 [Source:RefSeq peptide;Acc:NP_990100]	0.830603	0.495354	0.319365	0.702068	0.0648842	0.495338	0.80088	0.958273	-1.09485	0.495353	0.285927	0.605897	2.51156	0.495329	0.00346888	0.093128	-3.22359	0.495323	0.0415743	0.388644	-0.675137	0.495341	0.734119	0.945951	-4.3453	0.495323	0.00014438	0.0258702
ENSGALG00000010812	RYR2	chr3	36498791	36661068	-	protein_coding	ryanodine receptor 2 (cardiac) [Source:HGNC Symbol;Acc:HGNC:10484]	4.25681	1.92598	3.42006e-06	0.000288727	-3.75071	1.92602	0.0548983	0.29613	-0.977331	1.92599	0.465685	0.753132	-6.36639	1.92603	0.000691063	0.0395489	-5.97663	1.92605	0.00233906	0.111675	-0.0689425	1.92601	1	1	-6.25268	1.92604	0.000223609	0.0319761
ENSGALG00000011086	ACTA1	chr3	39337939	39339803	-	protein_coding	Actin, alpha skeletal muscle [Source:UniProtKB/Swiss-Prot;Acc:P68139]	3.28257	5.6096	1.80187e-27	8.41716e-24	1.07191	5.6096	0.00418425	0.0700574	-2.21297	5.6096	6.91304e-09	8.07327e-07	-2.57976	5.60961	1.59077e-06	0.000543732	-1.98783	5.60961	7.70266e-05	0.0220296	-2.71669	5.6096	3.99057e-07	8.22409e-05	-2.07764	5.60961	5.25061e-06	0.00432836
ENSGALG00000011117	AGT	chr3	39794447	39805046	-	protein_coding	angiotensinogen (serpin peptidase inhibitor, clade A, member 8) [Source:HGNC Symbol;Acc:HGNC:333]	-0.954302	0.624499	0.621706	0.889714	-4.53505	0.624486	0.0021614	0.0501487	0.269432	0.624497	0.686924	0.872736	-0.0973523	0.624479	1	1	-4.53445	0.624474	0.00247602	0.114019	3.0758	0.624488	0.000802127	0.0319852	-4.58004	0.624475	0.00049819	0.0403563
ENSGALG00000013604	VIP	chr3	48776284	48795822	+	protein_coding	VIP peptides Intestinal peptide PHI-27-like Vasoactive intestinal peptide [Source:UniProtKB/Swiss-Prot;Acc:P48143]	-3.7097	0.206631	0.00321116	0.0493658	3.18096	0.206628	0.000140571	0.00824252	1.03131	0.20663	0.184679	0.485208	-3.46329	0.206626	0.0117807	0.166931	-3.70507	0.206625	0.00366557	0.136832	-3.6975	0.206628	0.00651687	0.108723	-3.74925	0.206625	0.000801147	0.0483618
ENSGALG00000015068	GPR6	chr3	66173387	66197130	-	protein_coding	G protein-coupled receptor 6 [Source:HGNC Symbol;Acc:HGNC:4515]	-2.26728	-0.250815	0.0258996	0.175511	0.161343	-0.25082	0.73401	0.932326	-0.119671	-0.250816	1	1	-2.25496	-0.250823	0.0308034	0.27918	-2.26261	-0.250825	0.0285868	0.321522	-2.2561	-0.250819	0.0419602	0.288924	2.64806	-0.250824	0.000503508	0.0403929
ENSGALG00000015573	FHL5	chr3	72192774	72220889	-	protein_coding	four and a half LIM domains protein 5 [Source:RefSeq peptide;Acc:NP_001264652]	4.02778	1.38607	8.66069e-08	1.23848e-05	-1.2711	1.38604	0.396141	0.772097	-3.6232	1.38607	0.000807329	0.011655	0.765715	1.38603	0.357299	0.835358	-4.61665	1.38602	0.00228128	0.110927	-3.12788	1.38605	0.0433287	0.292349	-4.95597	1.38602	0.000326036	0.0359484
ENSGALG00000005077	F8	chr4	2122995	2142344	-	protein_coding	coagulation factor VIII, procoagulant component [Source:HGNC Symbol;Acc:HGNC:3546]	2.87795	0.945888	0.00268662	0.0440852	-2.07309	0.945908	0.265619	0.661406	-1.14484	0.94589	0.372012	0.682468	1.10481	0.945919	0.257536	0.759973	-1.47743	0.945927	0.437705	0.939692	-1.31259	0.945904	0.521308	0.867171	-5.11432	0.945926	0.000414022	0.0381717
ENSGALG00000005853	HTR2C	chr4	2769656	2802943	+	protein_coding	5-hydroxytryptamine (Serotonin) receptor 2C [Source:UniProtKB/TrEMBL;Acc:F1N989]	0.162393	0.657024	0.731347	0.926932	-0.906343	0.656997	0.656025	0.903151	2.43379	0.657021	0.00304169	0.031389	0.445964	0.656983	0.552691	0.929255	-4.58572	0.656973	0.00209744	0.106498	-4.57762	0.657002	0.00407854	0.0835294	-4.63135	0.656975	0.000404058	0.0381717
ENSGALG00000005964		chr4	3045899	3051722	+	protein_coding	Uncharacterized protein [Source:UniProtKB/TrEMBL;Acc:F1NBN4]	1.14985	0.229535	0.16772	0.515734	2.28943	0.229508	0.00513457	0.0770446	-3.4427	0.229532	0.000199953	0.00409072	1.05371	0.229494	0.210974	0.707148	-1.57054	0.229484	0.263783	0.863524	-1.94838	0.229513	0.164424	0.568473	-3.7919	0.229485	0.000284298	0.0349487
ENSGALG00000006087	GPC3	chr4	3824471	3937271	-	protein_coding	glypican 3 [Source:HGNC Symbol;Acc:HGNC:4451]	2.98115	6.16386	1.08626e-06	0.000109516	0.128248	6.16386	0.764757	0.946158	-1.7732	6.16386	0.0173378	0.110542	0.00221269	6.16386	0.880826	0.992645	-4.31267	6.16386	0.000191316	0.03846	-0.137987	6.16386	0.984651	1	-4.1055	6.16386	5.97607e-05	0.0164213
ENSGALG00000006877	KLHL4	chr4	8058003	8091302	-	protein_coding	kelch-like family member 4 [Source:HGNC Symbol;Acc:HGNC:6355]	-1.29481	2.58142	0.580299	0.871537	6.5239	2.58143	1.77061e-12	2.06778e-09	-7.18897	2.58142	3.84481e-06	0.000192433	-7.12016	2.58143	0.000989709	0.0474993	-4.17407	2.58143	0.0599475	0.472488	-7.1243	2.58143	0.00194526	0.0541795	-7.1798	2.58143	0.000129844	0.0245896
ENSGALG00000008072	CHRDL1	chr4	13471386	13513129	+	protein_coding	chordin-like protein 1 precursor [Source:RefSeq peptide;Acc:NP_989502]	-1.25461	1.29587	0.512152	0.835545	1.96275	1.29584	0.0454314	0.266838	-4.62391	1.29587	0.000422521	0.00711683	1.03841	1.29583	0.27883	0.781819	1.88168	1.29582	0.0556797	0.454861	-5.54776	1.29585	0.00203639	0.0548808	-5.43505	1.29582	0.000447199	0.0382137
ENSGALG00000014080	CWH43	chr4	65834288	65859538	-	protein_coding	cell wall biogenesis 43 C-terminal homolog (S. cerevisiae) [Source:HGNC Symbol;Acc:HGNC:26133]	-0.0273554	0.602782	1	1	-0.853747	0.602767	0.153071	0.50581	0.244065	0.60278	0.50389	0.776738	-1.5488	0.602758	0.0122422	0.170879	2.38256	0.602752	6.33882e-10	2.4817e-06	-2.34395	0.602769	0.000180964	0.0115877	-2.07877	0.602753	9.19779e-05	0.02046
ENSGALG00000027986	NIPAL1	chr4	66175121	66186188	-	protein_coding	NIPA-like domain containing 1 [Source:HGNC Symbol;Acc:HGNC:27194]	-2.86942	-0.0993895	0.0136358	0.117668	-1.54249	-0.0993814	0.31604	0.711712	-1.03185	-0.0993887	0.318823	0.639003	-2.85514	-0.099377	0.0163429	0.200401	-2.86474	-0.099374	0.0150672	0.243765	-2.85808	-0.0993829	0.024132	0.218044	4.05212	-0.0993744	9.85854e-08	0.000138158
ENSGALG00000027093	TLR1LB	chr4	69117413	69122553	+	protein_coding	toll-like receptor 6 [Source:RefSeq peptide;Acc:NP_001075178]	-2.20817	1.53398	0.0863503	0.358152	-0.614541	1.53397	0.687232	0.916341	-3.16426	1.53398	0.000995203	0.0136733	-1.70249	1.53397	0.206045	0.699796	-1.56012	1.53397	0.22657	0.827506	1.4097	1.53398	0.0820317	0.403932	2.44521	1.53397	0.000760672	0.0471684
ENSGALG00000027201		chr4	76600159	76601874	-	protein_coding	Uncharacterized protein [Source:UniProtKB/TrEMBL;Acc:R4GM39]	-0.743838	0.543271	0.642458	0.897785	-0.677601	0.543258	0.681597	0.914934	0.88328	0.54327	0.223393	0.536896	1.04384	0.543251	0.215811	0.712002	-0.649903	0.543246	0.695853	0.98509	0.641943	0.54326	0.41598	0.814182	-4.4354	0.543247	5.6242e-05	0.0163581
ENSGALG00000015023	STK32B	chr4	78489519	78638969	+	protein_coding	serine/threonine kinase 32B [Source:HGNC Symbol;Acc:HGNC:14217]	1.48276	0.862221	0.120803	0.433642	0.33756	0.862214	0.623793	0.888037	0.711275	0.86222	0.384234	0.6921	0.380415	0.862211	0.594837	0.937266	-3.20075	0.862208	0.061792	0.480772	-1.10009	0.862215	0.578817	0.891273	-4.97576	0.862209	0.000279326	0.0346414
ENSGALG00000015568	SH3TC1	chr4	80381670	80409920	+	protein_coding	SH3 domain and tetratricopeptide repeats 1 [Source:HGNC Symbol;Acc:HGNC:26009]	1.71051	1.44394	0.103363	0.399485	3.15475	1.44394	0.00206417	0.0489743	-1.38902	1.44394	0.321768	0.641442	-5.30671	1.44394	0.0102952	0.155975	-5.76307	1.44394	0.00235022	0.111675	-5.75484	1.44394	0.00504309	0.0949201	-5.80972	1.44394	0.000478091	0.039249
ENSGALG00000015935	SMYD1	chr4	85479636	85501396	+	protein_coding	SET and MYND domain-containing protein 1 [Source:RefSeq peptide;Acc:NP_989486]	6.93145	3.49544	1.78809e-13	8.35276e-11	-1.50022	3.49546	0.537406	0.850189	-8.17973	3.49545	1.3836e-06	7.96917e-05	-7.27549	3.49546	0.00386648	0.0980441	-8.12957	3.49547	0.000495923	0.0643506	-7.06074	3.49545	0.00687436	0.112151	-8.0057	3.49546	0.000167215	0.0276037
ENSGALG00000003908	SLC6A5	chr5	2204843	2231619	+	protein_coding	solute carrier family 6 (neurotransmitter transporter), member 5 [Source:HGNC Symbol;Acc:HGNC:11051]	-3.11092	-0.0242301	0.003028	0.047307	-0.677985	-0.0242174	0.670387	0.910084	-0.359871	-0.0242288	0.751715	0.901658	-3.09627	-0.0242103	0.00413637	0.10064	-1.27833	-0.0242057	0.322866	0.897688	-0.0426134	-0.0242197	1	1	2.61618	-0.0242064	0.000326308	0.0359484
ENSGALG00000006216	MYOD1	chr5	11578793	11582278	+	protein_coding	myoblast determination protein 1 homolog [Source:RefSeq peptide;Acc:NP_989545]	-0.904184	0.586006	0.638027	0.896354	3.084	0.586053	0.000541834	0.0215718	-2.36094	0.58601	0.0395771	0.195638	-2.10096	0.586079	0.214851	0.710625	-4.49013	0.586096	0.00195296	0.104138	1.49992	0.586044	0.112477	0.474202	-4.53577	0.586094	0.000368163	0.0368951
ENSGALG00000006521	TRPM5	chr5	12954871	12990576	+	protein_coding	transient receptor potential cation channel, subfamily M, member 5 [Source:HGNC Symbol;Acc:HGNC:14323]	-1.58439	-0.276717	0.122641	0.436549	0.0944668	-0.276612	0.791033	0.955334	-0.936581	-0.276707	0.241206	0.557866	-1.41928	-0.276554	0.2203	0.716141	-1.57356	-0.276516	0.132774	0.679088	-1.95209	-0.276631	0.056951	0.33633	2.94606	-0.276521	1.7396e-05	0.00840645
ENSGALG00000020492	MUC6	chr5	14423044	14459159	+	protein_coding	mucin 6, oligomeric mucus/gel-forming [Source:HGNC Symbol;Acc:HGNC:7517]	-2.03542	0.494096	0.176082	0.529066	-1.70889	0.494347	0.257928	0.65269	-0.0804693	0.49412	1	1	-0.599377	0.494487	0.777455	0.977504	-4.00185	0.494578	0.00550045	0.155889	-4.40513	0.494301	0.00192695	0.0539008	3.13804	0.494565	9.53788e-05	0.020885
ENSGALG00000014569	PNPLA2	chr5	15118617	15140092	-	protein_coding	patatin-like phospholipase domain-containing protein 2 [Source:RefSeq peptide;Acc:NP_001106762]	-3.5012	0.224859	0.00863254	0.0898093	-0.72587	0.224835	0.700839	0.921245	0.289324	0.224856	0.658316	0.859554	-3.72735	0.224822	0.00405603	0.100426	2.15121	0.224814	0.0145252	0.240542	1.11685	0.224839	0.209005	0.630788	-3.78189	0.224815	0.000769697	0.0473093
ENSGALG00000009562	PLEK2	chr5	28222462	28230939	-	protein_coding	pleckstrin-2 [Source:RefSeq peptide;Acc:NP_001264366]	-0.95229	2.26201	0.651095	0.90048	-2.11437	2.26201	0.254099	0.647656	3.97948	2.26201	1.78578e-06	9.79277e-05	-0.948521	2.26201	0.681552	0.9583	-4.51794	2.26201	0.0201261	0.273567	-6.75953	2.26201	0.000568623	0.025378	-6.19104	2.26201	0.000376328	0.0368951
ENSGALG00000010456		chr5	38465526	38472972	-	protein_coding	Uncharacterized protein [Source:UniProtKB/TrEMBL;Acc:E1C128]	-4.33385	0.498856	0.00186972	0.0345341	-2.30348	0.498896	0.144046	0.490303	0.32904	0.49886	0.636823	0.849875	-0.671593	0.498919	0.781447	0.977787	-0.764698	0.498934	0.696303	0.98509	3.0502	0.498889	0.000580328	0.025805	-4.37474	0.498931	0.000410694	0.0381717
ENSGALG00000010747	FBLN5	chr5	43740994	43781814	-	protein_coding	fibulin-5 precursor [Source:RefSeq peptide;Acc:NP_001264403]	2.13751	1.28812	0.0252295	0.17237	-0.747545	1.28809	0.743352	0.935832	-2.49635	1.28812	0.042744	0.205856	2.70576	1.28808	0.00467847	0.106814	-5.27687	1.28807	0.00188156	0.104138	-5.53711	1.2881	0.00156782	0.0488254	-5.59189	1.28807	0.00010962	0.0225913
ENSGALG00000011166		chr5	48086268	48093544	+	protein_coding	Uncharacterized protein [Source:UniProtKB/TrEMBL;Acc:F1NEA9]	0.352298	0.640998	0.614009	0.886753	-0.387095	0.64098	0.942085	0.997837	-0.191613	0.640996	0.955246	0.98913	2.00742	0.64097	0.038071	0.312186	-0.689575	0.640964	0.764443	0.990376	-0.330497	0.640984	0.989843	1	-4.60683	0.640965	0.000471505	0.0390986
ENSGALG00000020380		chr5	49383395	49385807	-	protein_coding	Uncharacterized protein [Source:UniProtKB/TrEMBL;Acc:E1C913]	-3.17163	0.330041	0.0108455	0.103888	1.19173	0.330045	0.145796	0.493762	1.44204	0.330041	0.0428253	0.205955	-0.559527	0.330048	0.771336	0.976593	-2.71404	0.33005	0.0371447	0.37076	0.658409	0.330045	0.396826	0.800428	-4.02567	0.330049	9.8424e-05	0.0208987
ENSGALG00000012095	C14orf105	chr5	55387429	55393814	+	protein_coding	chromosome 14 open reading frame 105 [Source:HGNC Symbol;Acc:HGNC:20189]	1.7626	0.61142	0.0536494	0.271092	-4.14344	0.611429	0.00661884	0.0885926	1.80607	0.611421	0.0243819	0.141694	-0.778544	0.611433	0.713923	0.96853	-0.997243	0.611436	0.570679	0.970228	-4.51221	0.611427	0.00280379	0.0677453	-4.56568	0.611436	0.000248527	0.0329328
ENSGALG00000012464	SOUL	chr5	58668917	58679545	+	protein_coding	SOUL protein [Source:RefSeq peptide;Acc:NP_990120]	-0.488436	2.29518	0.721382	0.925011	-0.670604	2.29518	0.599659	0.878672	-1.74118	2.29518	0.0394158	0.195185	-2.46651	2.29517	0.0467051	0.345578	0.0911933	2.29517	0.798546	0.991713	-0.752836	2.29518	0.56062	0.883258	2.50834	2.29517	0.000177838	0.0280234
ENSGALG00000004569	UNC5B	chr6	11331410	11360275	+	protein_coding	netrin receptor UNC5B precursor [Source:RefSeq peptide;Acc:NP_001026396]	1.62886	5.72752	0.000481021	0.0137062	0.537172	5.72752	0.270741	0.667518	-0.99957	5.72752	0.0390467	0.194112	-0.106326	5.72752	0.935244	1	-0.465673	5.72752	0.482332	0.954433	0.323293	5.72752	0.494963	0.855459	-2.36237	5.72752	0.000145836	0.0258702
ENSGALG00000005956		chr6	17424714	17438731	-	protein_coding	Annexin [Source:UniProtKB/TrEMBL;Acc:E1C8K3]	2.84532	2.25665	0.00277397	0.0447862	-2.09942	2.25667	0.255006	0.648575	-2.61237	2.25665	0.0411644	0.200653	2.24804	2.25668	0.023804	0.241286	-6.76619	2.25668	0.000222726	0.040536	-3.22735	2.25666	0.0948692	0.437623	-6.0045	2.25668	0.000470663	0.0390986
ENSGALG00000006343	ACTG2	chr6	18777069	18785435	-	protein_coding	actin, aortic smooth muscle [Source:RefSeq peptide;Acc:NP_001026400]	3.43054	8.16848	5.79179e-11	1.72694e-08	0.173308	8.16848	0.711942	0.923664	-3.61366	8.16848	3.86724e-07	2.64369e-05	0.351388	8.16848	0.533514	0.925302	-1.66699	8.16848	0.0556972	0.454861	-2.82023	8.16848	0.0029093	0.0695274	-3.64897	8.16848	2.80957e-05	0.0109862
ENSGALG00000027119		chr6	21801418	21802488	-	protein_coding	Uncharacterized protein [Source:UniProtKB/TrEMBL;Acc:R4GFP4]	-0.530479	0.038449	0.738553	0.929082	3.04175	0.0384575	3.67385e-05	0.00340834	-0.317482	0.0384498	0.776491	0.913389	-0.548098	0.0384623	0.749453	0.974676	-1.24981	0.0384654	0.385958	0.92089	-3.27757	0.038456	0.00354239	0.0768469	-3.3278	0.038465	0.000386316	0.037081
ENSGALG00000007837	KAZALD1	chr6	22598417	22602875	-	protein_coding	Kazal-type serine peptidase inhibitor domain 1 [Source:HGNC Symbol;Acc:HGNC:25460]	0.413081	5.9687	0.396278	0.764284	2.4296	5.9687	8.22354e-08	2.8847e-05	-1.35062	5.9687	0.00753127	0.0617934	0.164229	5.9687	0.699554	0.964536	-0.373612	5.96869	0.596178	0.974994	-2.41902	5.9687	0.000919076	0.0342287	-2.12574	5.96869	0.000781383	0.0478179
ENSGALG00000002552	COL3A1	chr7	571200	611944	-	protein_coding	Gallus gallus collagen, type III, alpha 1 (COL3A1), mRNA. [Source:RefSeq mRNA;Acc:NM_205380]	2.4015	0.976917	0.00398659	0.0565969	-0.474689	0.97692	0.831016	0.965287	-0.43041	0.976917	0.71342	0.885393	0.906568	0.976921	0.288175	0.788468	-1.30491	0.976922	0.383719	0.919859	-2.27716	0.976919	0.135463	0.52226	-4.95771	0.976922	7.32197e-05	0.0180018
ENSGALG00000026135		chr7	1745720	1746838	+	protein_coding	Uncharacterized protein [Source:UniProtKB/TrEMBL;Acc:R4GHA9]	-2.53479	-0.189744	0.0115657	0.10768	-2.07122	-0.189739	0.0641838	0.321119	-0.0624696	-0.189743	1	1	-2.52143	-0.189737	0.0145708	0.187852	-2.30625	-0.189735	0.0363265	0.366508	-0.979393	-0.18974	0.495103	0.855459	3.09145	-0.189735	1.44176e-05	0.00748329
ENSGALG00000003553	ABCA12	chr7	4209985	4288793	-	protein_coding	ATP-binding cassette, sub-family A (ABC1), member 12 [Source:HGNC Symbol;Acc:HGNC:14637]	-3.17215	-0.000855364	0.0108384	0.103888	1.35267	-0.00085627	0.137502	0.479551	-3.32556	-0.000855452	0.000160544	0.0035599	-3.15766	-0.000856783	0.0130055	0.177295	-3.16753	-0.000857121	0.0119307	0.216879	-2.9323	-0.000856104	0.044299	0.296204	3.26205	-0.000857072	7.20485e-05	0.0180018
ENSGALG00000003904	MLPH	chr7	4722132	4740447	-	protein_coding	melanophilin [Source:RefSeq peptide;Acc:NP_001108552]	-4.61934	0.675232	0.00157134	0.031268	-4.61552	0.6752	0.00155389	0.0423662	4.97306	0.675229	2.70551e-11	5.92423e-09	-0.907787	0.675183	0.659025	0.954067	-4.61489	0.675171	0.0017918	0.103036	-4.60676	0.675206	0.00349099	0.0766425	-4.66056	0.675173	0.000331013	0.0359484
ENSGALG00000009089	titin	chr7	14648300	14691849	+	protein_coding	Uncharacterized protein [Source:UniProtKB/TrEMBL;Acc:F1NGF6]	6.02834	3.58352	2.94682e-11	9.60389e-09	-3.21083	3.58355	0.125637	0.455072	-3.19386	3.58353	0.0271534	0.151786	-7.96969	3.58356	0.000540943	0.0344581	-8.2264	3.58357	0.000170463	0.037326	-1.50563	3.58354	0.505167	0.859215	-8.1011	3.58357	4.73548e-05	0.0154049
ENSGALG00000018439	DLX1	chr7	17337963	17338619	-	protein_coding	Gallus gallus distal-less homeobox 1 (DLX1), mRNA. [Source:RefSeq mRNA;Acc:NM_001045842]	2.29692	3.93927	0.000131016	0.00535293	-0.556561	3.93927	0.57704	0.86897	-6.9092	3.93927	2.75047e-16	1.5418e-13	1.7433	3.93927	0.00644275	0.124023	-1.06444	3.93927	0.256305	0.857654	-0.400717	3.93927	0.72103	0.941385	-3.22413	3.93927	0.000398804	0.0380193
ENSGALG00000011352	CCDC108	chr7	21821607	21838423	+	protein_coding	coiled-coil domain containing 108 [Source:HGNC Symbol;Acc:HGNC:25325]	-3.31381	0.0482819	0.00507109	0.0652032	-3.31036	0.0482825	0.00505146	0.0765444	0.763698	0.048282	0.309134	0.629589	-3.29902	0.0482828	0.00650154	0.124308	-1.06273	0.0482829	0.571611	0.970424	-3.07072	0.0482824	0.0241136	0.218044	2.70058	0.0482829	0.000746455	0.0469159
ENSGALG00000026687	PLCD4	chr7	21980710	21988531	-	protein_coding	phospholipase C, delta 4 [Source:HGNC Symbol;Acc:HGNC:9062]	2.98562	1.29948	0.000873544	0.0211175	1.16329	1.29946	0.211102	0.594629	-1.40074	1.29948	0.23093	0.544825	-3.75764	1.29946	0.0334919	0.293098	-1.7667	1.29945	0.298621	0.886152	-1.02877	1.29947	0.59746	0.898755	-5.61033	1.29945	6.33628e-05	0.0167541
ENSGALG00000011813	HEG1	chr7	27453193	27465873	-	protein_coding	heart development protein with EGF-like domains 1 [Source:HGNC Symbol;Acc:HGNC:29227]	-1.4334	1.40598	0.372788	0.747362	2.60099	1.40597	0.0031313	0.0604658	-4.70898	1.40598	6.67775e-05	0.00179276	-0.412245	1.40596	0.912405	0.998386	1.07612	1.40595	0.229649	0.829571	0.269161	1.40597	0.659885	0.919641	-5.59665	1.40595	6.64388e-05	0.0172421
ENSGALG00000012117	STEAP3	chr7	27906368	27920392	-	protein_coding	STEAP family member 3, metalloreductase [Source:HGNC Symbol;Acc:HGNC:24592]	0.0607165	1.32611	0.782397	0.943134	-5.63567	1.3262	0.00142577	0.0402837	-2.44386	1.32612	0.0666412	0.272218	4.5597	1.32626	1.16285e-06	0.000428847	-1.49344	1.32629	0.483581	0.955219	-5.62764	1.32619	0.00346566	0.0766053	-5.6822	1.32629	0.000298652	0.0357718
ENSGALG00000003069		chr8	4327896	4342099	+	protein_coding	Uncharacterized protein [Source:UniProtKB/TrEMBL;Acc:E1C5L7]	-1.82246	-0.337293	0.0438289	0.238439	-1.82014	-0.337293	0.0438842	0.261849	-0.717997	-0.337293	0.469753	0.755464	-1.81116	-0.337293	0.0519038	0.365518	0.412406	-0.337293	0.539753	0.967773	-1.81242	-0.337293	0.0659028	0.362668	2.6377	-0.337293	0.00015977	0.0273052
ENSGALG00000004526	TNR	chr8	6987423	7040612	+	protein_coding	tenascin-R precursor [Source:RefSeq peptide;Acc:NP_990607]	1.15184	0.372775	0.168631	0.51666	0.120896	0.372749	0.759252	0.943859	-0.899692	0.372772	0.373212	0.684133	-0.0652805	0.372734	1	1	1.88204	0.372725	0.0256578	0.304515	-4.04848	0.372754	0.00186082	0.0528436	-3.92961	0.372726	0.000565427	0.0425305
ENSGALG00000004538	TNN	chr8	7050887	7074497	-	protein_coding	tenascin N [Source:HGNC Symbol;Acc:HGNC:22942]	-0.602548	0.302123	0.779759	0.942481	0.488362	0.302121	0.521673	0.844897	2.31797	0.302123	0.00311943	0.0320496	-1.02134	0.30212	0.576994	0.934253	-1.02248	0.30212	0.585492	0.971291	-3.91195	0.302122	0.00595365	0.103903	-3.96423	0.30212	0.000697595	0.0461383
ENSGALG00000004857	BRINP3	chr8	8198959	8401728	+	protein_coding	bone morphogenetic protein/retinoic acid inducible neural-specific 3 [Source:HGNC Symbol;Acc:HGNC:22393]	-3.9163	0.659085	0.0205361	0.150892	-4.60438	0.659097	0.00220401	0.0506345	-0.522042	0.659086	0.708343	0.883246	-1.68364	0.659104	0.359883	0.837312	-2.34835	0.659108	0.168473	0.74605	4.37343	0.659095	3.75324e-07	8.09199e-05	-4.64959	0.659108	0.000510974	0.0403929
ENSGALG00000005257	VCAM1	chr8	10818883	10826594	+	protein_coding	vascular cell adhesion molecule 1 [Source:HGNC Symbol;Acc:HGNC:12663]	0.269774	0.960098	0.662818	0.904964	-1.04827	0.960132	0.654293	0.902191	-5.2657	0.960101	2.05262e-05	0.000735689	4.54299	0.960151	2.08514e-06	0.000695743	-5.09437	0.960163	0.00370427	0.136832	-3.95255	0.960126	0.060689	0.34646	-5.1406	0.960162	0.000841932	0.0494442
ENSGALG00000009957	TIE1	chr8	18560220	18571250	+	protein_coding	tyrosine kinase with immunoglobulin-like and EGF-like domains 1 [Source:HGNC Symbol;Acc:HGNC:11809]	-2.28646	1.35615	0.196655	0.558095	3.27767	1.35615	0.000395574	0.0174876	-0.384503	1.35615	0.812068	0.929988	-5.63424	1.35615	0.000914188	0.0452052	-0.424448	1.35615	0.925467	1	-0.281647	1.35615	1	1	-5.69298	1.35615	0.000113686	0.02276
ENSGALG00000010343	TSPAN1	chr8	20388275	20392555	+	protein_coding	tetraspanin-1 [Source:RefSeq peptide;Acc:NP_001264519]	-1.31044	0.8555	0.476864	0.81858	-0.835635	0.855466	0.702147	0.921285	-2.61648	0.855497	0.0325246	0.171506	2.69771	0.855447	0.00502418	0.110014	1.24478	0.855435	0.194119	0.783973	-0.348455	0.855472	0.98081	1	-4.95519	0.855437	0.000346422	0.0360464
ENSGALG00000028153		chr8	20873411	20875481	+	protein_coding	Uncharacterized protein [Source:UniProtKB/TrEMBL;Acc:R4GI79]	2.9987	2.6854	0.00121454	0.0262135	-1.85539	2.68541	0.301272	0.69981	-1.97131	2.6854	0.108471	0.362362	1.9874	2.68542	0.0432232	0.332636	-6.4826	2.68543	0.00144382	0.0962574	-7.02439	2.68541	0.000495128	0.0226756	-6.85864	2.68543	7.59724e-05	0.0180454
ENSGALG00000010721	GLIS1	chr8	23804849	23900621	-	protein_coding	GLIS family zinc finger 1 [Source:HGNC Symbol;Acc:HGNC:29525]	1.74957	0.672088	0.0723047	0.323731	-4.02713	0.672058	0.018228	0.163538	0.346528	0.672085	0.635921	0.84961	-4.59863	0.672042	0.00355457	0.0945233	2.02451	0.672031	0.0384403	0.375402	-4.60194	0.672063	0.00609891	0.105307	-4.65572	0.672032	0.000675316	0.0454994
ENSGALG00000011058	LPR	chr8	27238562	27268762	+	protein_coding	leptin receptor precursor [Source:RefSeq peptide;Acc:NP_989654]	2.29311	1.09113	0.024046	0.166877	-0.230478	1.09114	1	1	-0.104586	1.09113	1	1	0.840558	1.09115	0.376618	0.848519	-1.28829	1.09116	0.54196	0.967773	-5.27255	1.09114	0.0054363	0.0986844	-5.327	1.09115	0.000546984	0.04166
ENSGALG00000002263	KLHL6	chr9	2069219	2087633	-	protein_coding	kelch-like 6 [Source:RefSeq peptide;Acc:NP_001026474]	2.03083	1.03445	0.0488539	0.255962	3.37639	1.03444	0.00067564	0.0253288	-5.25079	1.03445	5.72466e-05	0.00159177	-5.17874	1.03444	0.00376195	0.0969781	-5.1907	1.03443	0.00336021	0.131473	-5.18253	1.03444	0.00688694	0.112222	-5.23696	1.03443	0.000745103	0.0469159
ENSGALG00000009372	PHC3	chr9	19303970	19329980	+	protein_coding	polyhomeotic homolog 3 (Drosophila) [Source:HGNC Symbol;Acc:HGNC:15682]	0.416398	1.73505	0.572707	0.866443	-6.13465	1.73505	0.000132751	0.00798444	1.62707	1.73505	0.0464697	0.218312	-0.0429904	1.73505	1	1	-1.50394	1.73505	0.370166	0.915384	0.799273	1.73505	0.363795	0.775597	-6.18128	1.73505	1.54421e-05	0.00772875
ENSGALG00000009437	MECOM	chr9	19449373	19752139	+	protein_coding	MDS1 and EVI1 complex locus [Source:HGNC Symbol;Acc:HGNC:3498]	2.4339	4.56008	1.71783e-13	8.30127e-11	0.781219	4.56008	0.0407867	0.251467	-2.01592	4.56008	1.14172e-07	9.19546e-06	0.814808	4.56009	0.0368223	0.308076	-2.06879	4.56009	4.18139e-05	0.0168515	-1.16676	4.56008	0.01741	0.183475	-4.28991	4.56009	6.01143e-17	4.21221e-13
ENSGALG00000009468		chr9	20016228	20026060	-	protein_coding	Uncharacterized protein [Source:UniProtKB/TrEMBL;Acc:F1NXD6]	1.90243	0.327262	0.0397918	0.225644	0.170885	0.327325	0.725685	0.929338	1.60635	0.327268	0.049566	0.226851	-3.9909	0.327359	0.00406944	0.10058	-4.00252	0.327382	0.00360417	0.135413	-3.99546	0.327313	0.00664753	0.110014	-4.04748	0.327379	0.00079182	0.0480852
ENSGALG00000003005	CHRNB4	chr10	3103512	3116708	+	protein_coding	neuronal acetylcholine receptor subunit beta-4 precursor [Source:RefSeq peptide;Acc:NP_990150]	-5.34194	1.52582	0.00980408	0.0968503	-5.87095	1.52582	0.00184995	0.0461753	-5.9364	1.52582	2.29175e-05	0.000806948	-5.85851	1.52582	0.0023775	0.0755393	-5.87076	1.52583	0.00208732	0.106498	8.58842	1.52582	2.99827e-35	4.20178e-31	-5.91748	1.52583	0.00041189	0.0381717
ENSGALG00000004103	FAM81A	chr10	6216548	6227549	-	protein_coding	family with sequence similarity 81, member A [Source:HGNC Symbol;Acc:HGNC:28379]	2.73481	0.811187	0.00172523	0.0329416	-4.84414	0.811166	0.000676	0.0253288	-1.56535	0.811185	0.156541	0.444812	1.61257	0.811154	0.0821457	0.464512	-1.07682	0.811147	0.529412	0.966763	-1.457	0.81117	0.386151	0.792057	-4.72662	0.811148	0.000383081	0.037081
ENSGALG00000013293	GLDN	chr10	8745469	8761869	+	protein_coding	gliomedin [Source:HGNC Symbol;Acc:HGNC:29514]	2.41733	0.434883	0.00854518	0.0893007	-0.183551	0.434881	1	1	1.27204	0.434883	0.124454	0.392637	-4.1783	0.43488	0.00374383	0.0969781	-4.18948	0.434879	0.00329327	0.12964	-4.18167	0.434881	0.00615259	0.105535	-4.23459	0.434879	0.000709723	0.0463651
ENSGALG00000006413	CEMIP	chr10	11740664	11788096	-	protein_coding	cell migration inducing protein, hyaluronan binding [Source:HGNC Symbol;Acc:HGNC:29213]	0.735287	1.23534	0.384484	0.755809	0.036359	1.23536	0.816214	0.961944	-0.254321	1.23534	0.880468	0.957393	0.111591	1.23537	0.761493	0.975195	1.35545	1.23537	0.135627	0.681706	-0.710893	1.23535	0.734374	0.945951	-5.53269	1.23537	2.91408e-05	0.0109862
ENSGALG00000025898	SMAD6	chr10	18171488	18201886	+	protein_coding	Mothers against decapentaplegic homolog 6 [Source:UniProtKB/Swiss-Prot;Acc:Q9W734]	2.80461	4.26754	7.413e-11	2.16429e-08	0.734828	4.26756	0.141846	0.487451	-2.36292	4.26754	6.39153e-06	0.000285258	-0.0506538	4.26757	0.986784	1	-1.09044	4.26758	0.0994724	0.606523	-2.14673	4.26756	0.00255021	0.0631425	-2.21423	4.26758	0.000427404	0.0382137
ENSGALG00000021450		chr11	1044295	1057861	-	protein_coding	Uncharacterized protein [Source:UniProtKB/TrEMBL;Acc:F1N9B0]	1.72424	-0.0931881	0.0122711	0.110519	-1.43914	-0.0931919	0.147839	0.496713	-0.997481	-0.0931884	0.180203	0.478651	0.579847	-0.093194	0.387137	0.854249	0.689257	-0.0931955	0.328933	0.900938	-0.0752698	-0.0931912	1	1	-2.92027	-0.0931953	0.000205238	0.0309269
ENSGALG00000001824		chr11	1155407	1157865	+	protein_coding	Uncharacterized protein [Source:UniProtKB/TrEMBL;Acc:F1NFS8]	1.95532	1.1176	0.0193415	0.145962	-1.04639	1.1176	0.484504	0.823811	-0.746752	1.1176	0.466314	0.753218	0.509319	1.1176	0.500302	0.915902	0.505193	1.1176	0.501597	0.959732	-0.516326	1.1176	0.804182	0.965475	-5.19579	1.1176	3.17342e-05	0.0109862
ENSGALG00000026903	CALB2	chr11	1479310	1484634	-	protein_coding	Calretinin [Source:UniProtKB/Swiss-Prot;Acc:P07090]	-1.6066	1.0453	0.282188	0.664412	-2.22373	1.04528	0.140282	0.483977	-0.165151	1.0453	0.949431	0.986823	-2.98512	1.04527	0.0562533	0.384553	-2.36286	1.04526	0.1179	0.649546	0.0151838	1.04528	0.829792	0.969624	2.7524	1.04526	0.000598337	0.0434461
ENSGALG00000002407	HYDIN	chr11	1537250	1641091	+	protein_coding	HYDIN, axonemal central pair apparatus protein [Source:HGNC Symbol;Acc:HGNC:19368]	-2.66397	-0.152904	0.016693	0.134092	-2.66118	-0.15292	0.0164954	0.154834	-2.8092	-0.152906	0.000343738	0.00609061	-0.613359	-0.152928	0.794069	0.980811	-2.65931	-0.152934	0.0184456	0.262433	1.11342	-0.152917	0.191766	0.608699	2.92446	-0.152933	0.000200759	0.0305808
ENSGALG00000004510	ZNF536	chr11	8249369	8451306	+	protein_coding	zinc finger protein 536 [Source:HGNC Symbol;Acc:HGNC:29025]	0.806674	0.710982	0.361747	0.739015	0.374515	0.710976	0.598675	0.878281	-3.68017	0.710981	0.00198324	0.0231417	1.42047	0.710973	0.138576	0.59497	-0.00873362	0.710971	1	1	1.02847	0.710977	0.267282	0.694031	-4.73066	0.710971	0.00032655	0.0359484
ENSGALG00000005140	RRAD	chr11	10672970	10676978	+	protein_coding	GTP-binding protein RAD [Source:RefSeq peptide;Acc:NP_001264535]	2.55973	0.731897	0.00401032	0.0567684	-4.71592	0.731878	0.000953159	0.0321869	-1.13619	0.731895	0.310734	0.631562	-2.08299	0.731868	0.219454	0.715311	0.783735	0.731861	0.364887	0.915384	0.632476	0.731882	0.447794	0.831217	-4.76114	0.731862	0.000179971	0.0280234
ENSGALG00000005178	CA7	chr11	10773808	10782445	-	protein_coding	carbonic anhydrase VII [Source:HGNC Symbol;Acc:HGNC:1381]	-1.40457	1.45795	0.392926	0.762557	-2.98185	1.45794	0.0693873	0.336585	-0.226195	1.45795	0.909296	0.968025	-2.60702	1.45793	0.127054	0.571652	-2.22169	1.45793	0.172424	0.751262	3.91458	1.45794	2.93001e-06	0.000423311	-5.82366	1.45793	2.43956e-05	0.0109777
ENSGALG00000005272	CDH5	chr11	10982217	11011468	-	protein_coding	Cadherin-5 [Source:UniProtKB/Swiss-Prot;Acc:Q8AYD0]	0.0777163	3.85215	0.758707	0.936374	5.30984	3.85215	1.44835e-07	4.51049e-05	-6.10862	3.85215	0.000491456	0.00797136	-8.10049	3.85215	0.00185187	0.0646621	-8.27733	3.85215	0.000895947	0.0824831	-4.0597	3.85215	0.0970342	0.442187	-7.96433	3.85215	0.000435945	0.0382137
ENSGALG00000000521	SPIRE2	chr11	18260413	18267088	+	protein_coding	spire-type actin nucleation factor 2 [Source:HGNC Symbol;Acc:HGNC:30623]	-3.0682	0.171914	0.0256019	0.174181	-2.84203	0.171918	0.0380274	0.241185	-0.00546042	0.171915	1	1	-3.61563	0.17192	0.0039797	0.0991561	0.266969	0.171921	0.664496	0.981678	3.23891	0.171917	7.57696e-05	0.00593204	-3.67012	0.171921	0.000747671	0.0469159
ENSGALG00000002335	DOCK3	chr12	2064730	2203333	+	protein_coding	dedicator of cytokinesis 3 [Source:HGNC Symbol;Acc:HGNC:2989]	-5.33148	1.61465	0.0025135	0.0421557	0.991631	1.61465	0.270442	0.667014	-1.18202	1.61465	0.302679	0.622157	-1.81925	1.61465	0.291198	0.791666	-1.41074	1.61465	0.402453	0.928675	-5.97585	1.61465	0.000397671	0.0199035	2.85367	1.61465	0.000740512	0.0469159
ENSGALG00000005404	LRTM1	chr12	7650016	7653854	-	protein_coding	leucine-rich repeats and transmembrane domains 1 [Source:HGNC Symbol;Acc:HGNC:25023]	-2.02461	0.478116	0.203336	0.567056	1.82494	0.478141	0.0452995	0.266674	-2.75805	0.478119	0.0114157	0.0822103	2.66748	0.478155	0.0029503	0.0856371	-0.213232	0.478164	1	1	-4.27633	0.478137	0.00344154	0.0764022	-4.32929	0.478163	0.000334589	0.0359484
ENSGALG00000005537	ASB14	chr12	8627514	8635443	-	protein_coding	ankyrin repeat and SOCS box containing 14 [Source:HGNC Symbol;Acc:HGNC:19766]	-0.886103	0.227656	0.601149	0.882815	0.177184	0.227657	0.722652	0.927489	0.281067	0.227656	0.659285	0.860068	-0.106654	0.227657	1	1	1.26031	0.227657	0.155633	0.720528	0.288781	0.227656	0.650145	0.916193	-3.80037	0.227657	0.000717864	0.0465556
ENSGALG00000007727		chr12	15571303	15598096	+	protein_coding	Uncharacterized protein [Source:UniProtKB/TrEMBL;Acc:F1NS00]	-4.24525	0.456403	0.00227557	0.0394532	-2.11456	0.456419	0.213639	0.598428	1.05347	0.456405	0.1966	0.502672	0.882522	0.456427	0.326827	0.819787	1.28852	0.456433	0.164215	0.735642	-0.0896745	0.456416	1	1	-4.28598	0.456432	0.000521701	0.0403929
ENSGALG00000007927	CNTN6	chr12	17553475	17631889	+	protein_coding	contactin 6 [Source:HGNC Symbol;Acc:HGNC:2176]	-2.17771	-0.268746	0.0248699	0.171014	0.13917	-0.26876	0.753373	0.940226	-0.738141	-0.268748	0.440035	0.732382	-2.16619	-0.268768	0.0300559	0.274973	-2.17298	-0.268773	0.027629	0.316076	-0.0217729	-0.268758	1	1	2.46112	-0.268772	0.000765024	0.0472293
ENSGALG00000008351	CAV3	chr12	19261585	19265022	+	protein_coding	caveolin-3 [Source:RefSeq peptide;Acc:NP_989701]	-3.95793	0.323266	0.00155725	0.031138	-3.95438	0.32324	0.00156437	0.0424865	3.7187	0.323263	1.06592e-07	8.63459e-06	-3.94275	0.323225	0.00213707	0.070634	-2.39698	0.323215	0.0950138	0.592303	0.260646	0.323244	0.666294	0.921762	-3.99797	0.323217	0.000331418	0.0359484
ENSGALG00000002080	DOCK2	chr13	3332166	3492561	-	protein_coding	dedicator of cytokinesis 2 [Source:HGNC Symbol;Acc:HGNC:2988]	-0.909433	1.12524	0.643603	0.898263	-1.33441	1.12524	0.464297	0.811708	-1.58593	1.12524	0.183454	0.483529	-3.15247	1.12524	0.0812639	0.462376	-2.45278	1.12524	0.155385	0.719616	-0.253411	1.12524	1	1	3.29059	1.12524	0.000139284	0.0256832
ENSGALG00000027232	C1QTNF2	chr13	7179900	7187416	+	protein_coding	complement C1q tumor necrosis factor-related protein 2 precursor [Source:RefSeq peptide;Acc:NP_001264631]	-1.86733	-0.328656	0.039979	0.225839	0.50115	-0.328664	0.472648	0.816702	-1.0321	-0.328657	0.215845	0.527465	-1.85664	-0.328668	0.0476473	0.348444	-1.86272	-0.328671	0.044099	0.400261	-1.85644	-0.328662	0.0605577	0.34639	2.76643	-0.328671	4.8367e-05	0.0154049
ENSGALG00000026787	HAND1	chr13	11453019	11454119	+	protein_coding	heart- and neural crest derivatives-expressed protein 1 [Source:RefSeq peptide;Acc:NP_990296]	1.24155	0.466875	0.133445	0.458133	3.03424	0.466901	8.95754e-05	0.0062144	-3.25251	0.466878	0.000799059	0.0115563	-0.766684	0.466915	0.640728	0.94997	-0.691779	0.466924	0.657649	0.981678	-4.25516	0.466896	0.000934523	0.0344642	-4.02965	0.466923	0.000244704	0.0329328
ENSGALG00000005672	SLC6A7	chr13	12538728	12548642	-	protein_coding	solute carrier family 6 (neurotransmitter transporter), member 7 [Source:HGNC Symbol;Acc:HGNC:11054]	0.836329	1.71139	0.359346	0.737532	2.67879	1.71143	0.00505781	0.0765444	-6.29175	1.71139	2.73567e-07	1.94607e-05	0.981353	1.71145	0.3014	0.800165	-0.48637	1.71147	0.896323	0.999969	-6.10991	1.71142	0.000958328	0.0350977	-5.75499	1.71146	0.000514789	0.0403929
ENSGALG00000007343	FGF1	chr13	16717403	16731816	-	protein_coding	Fibroblast growth factor 1 Endothelial cell growth factor alpha [Source:UniProtKB/Swiss-Prot;Acc:P19596]	2.1626	0.904414	0.00742342	0.0821737	0.150154	0.904408	0.745916	0.936788	-2.33057	0.904414	0.0172215	0.109951	0.782341	0.904405	0.335682	0.824501	0.0837444	0.904402	0.787932	0.991713	-0.582457	0.904409	0.745695	0.949022	-5.04242	0.904403	9.60789e-06	0.00585413
ENSGALG00000005258	SS5R	chr14	5610706	5611785	-	protein_coding	somatostatin receptor type 5 [Source:RefSeq peptide;Acc:NP_001020005]	-3.03459	0.0408923	0.0251073	0.172056	-3.27275	0.0408644	0.0097907	0.114034	-3.43013	0.0408896	0.000139181	0.00318707	-3.26177	0.0408488	0.0120177	0.168962	-3.2714	0.0408386	0.0110039	0.207348	-3.26363	0.0408695	0.0185227	0.188999	5.59731	0.0408401	1.56266e-18	2.18991e-14
ENSGALG00000005293	GNG13	chr14	5968997	5970919	+	protein_coding	guanine nucleotide binding protein (G protein), gamma 13 [Source:RefSeq peptide;Acc:NP_001254748]	-2.8511	1.36642	0.0546904	0.273921	-5.11112	1.36642	0.000806426	0.0286108	-2.28942	1.36642	0.0287187	0.157732	-2.33709	1.36642	0.129122	0.577015	-4.4822	1.36642	0.0032366	0.128857	5.78273	1.36642	3.41642e-18	6.83967e-15	-5.48544	1.36642	2.42503e-05	0.0109777
ENSGALG00000005413	HS3ST6	chr14	6073676	6095679	-	protein_coding	heparan sulfate (glucosamine) 3-O-sulfotransferase 6 [Source:HGNC Symbol;Acc:HGNC:14178]	-3.44398	0.182332	0.0042316	0.0586564	-3.44287	0.182318	0.00438672	0.0718172	0.0696045	0.18233	0.840875	0.940797	-0.166555	0.18231	1	1	-0.749161	0.182305	0.6362	0.980375	-1.69469	0.18232	0.216613	0.639818	2.52713	0.182306	0.000792614	0.0480852
ENSGALG00000005421		chr14	6117483	6121898	+	protein_coding	Uncharacterized protein [Source:UniProtKB/TrEMBL;Acc:F1NX58]	-4.38148	0.52745	0.00227755	0.0394532	4.40661	0.527478	1.51482e-07	4.61492e-05	-1.47433	0.527453	0.204186	0.511707	-3.95977	0.527493	0.01417	0.185363	-2.11974	0.527503	0.22037	0.819019	-0.365346	0.527473	0.964724	1	-4.42243	0.527502	0.00052018	0.0403929
ENSGALG00000002252		chr15	2468659	2550748	+	protein_coding	Uncharacterized protein [Source:UniProtKB/TrEMBL;Acc:E1BTM4]	-5.03879	0.929103	0.00123831	0.0265752	-4.02985	0.9291	0.0202426	0.174036	-2.12705	0.929103	0.078693	0.299487	2.28825	0.929099	0.0183702	0.212217	-1.63127	0.929098	0.3552	0.913567	2.73815	0.929101	0.0037274	0.0792652	-5.08054	0.929098	0.000244547	0.0329328
ENSGALG00000004582	MYL2	chr15	6028493	6032632	-	protein_coding	myosin regulatory light chain 2A, cardiac muscle isoform [Source:RefSeq peptide;Acc:NP_001258858]	10.1856	4.92671	2.38896e-32	3.34789e-28	-5.68038	4.92671	0.0209865	0.177386	-7.6817	4.92671	2.70858e-05	0.000925807	-7.97004	4.92671	0.00331716	0.0916898	-9.61423	4.92671	0.000124219	0.0301608	-9.20882	4.92671	0.000949972	0.034942	-8.29739	4.92671	0.00037301	0.0368951
ENSGALG00000005122	MYO1H	chr15	6712191	6726855	+	protein_coding	myosin IH [Source:HGNC Symbol;Acc:HGNC:13879]	-3.35156	0.0650648	0.0104712	0.101063	-3.34816	0.0650543	0.0101949	0.116821	-3.50692	0.0650638	0.000153437	0.00345148	-3.33694	0.0650484	0.0124348	0.172707	-3.34701	0.0650445	0.0114816	0.212839	1.01768	0.0650562	0.26325	0.689219	3.69133	0.0650451	1.08042e-05	0.00630874
ENSGALG00000007720	AIFM3	chr15	10038154	10064717	+	protein_coding	apoptosis-inducing factor, mitochondrion-associated, 3 [Source:HGNC Symbol;Acc:HGNC:26398]	0.807014	0.600641	0.343081	0.721698	2.00119	0.600619	0.0254735	0.19575	0.0942265	0.600639	0.822731	0.933612	-4.2398	0.600606	0.00398351	0.0991561	-4.27817	0.600598	0.00320782	0.128605	0.554529	0.600623	0.484632	0.849698	-4.53481	0.600599	0.000186441	0.0287119
ENSGALG00000000117	TRIM27.1	chr16	150525	169149	+	protein_coding	tripartite motif-containing 27 [Source:RefSeq peptide;Acc:NP_001025842]	1.10127	0.139697	0.189739	0.54938	1.28923	0.13969	0.129916	0.464332	-2.66491	0.139696	0.00668335	0.05649	-0.179611	0.139686	1	1	0.109339	0.139683	0.783046	0.991713	0.85618	0.139691	0.305558	0.72986	-3.58641	0.139684	0.000639234	0.0447894
ENSGALG00000003028	ADAMTS13	chr17	6906389	6925818	+	protein_coding	ADAM metallopeptidase with thrombospondin type 1 motif, 13 [Source:HGNC Symbol;Acc:HGNC:1366]	-3.90641	0.878639	0.03213	0.201013	2.08718	0.878644	0.0343411	0.228594	-5.13035	0.878639	7.56396e-06	0.000334389	1.13222	0.878646	0.245844	0.747517	-3.57488	0.878648	0.0461737	0.410583	2.0166	0.878643	0.0433525	0.292369	-5.00567	0.878648	0.000457153	0.0383626
ENSGALG00000001111	DNAH9	chr18	1043607	1208388	+	protein_coding	dynein, axonemal, heavy chain 9 [Source:HGNC Symbol;Acc:HGNC:2953]	-1.32886	0.916345	0.444037	0.796572	1.63897	0.916317	0.0820311	0.364409	-0.401346	0.916343	0.78044	0.915156	1.30952	0.916301	0.167677	0.648623	0.039069	0.916291	0.810225	0.991713	-0.886983	0.916322	0.665766	0.921667	-5.05209	0.916292	0.00016653	0.0276037
ENSGALG00000023608		chr18	2535558	2536882	-	protein_coding	Uncharacterized protein [Source:UniProtKB/TrEMBL;Acc:F1NK71]	-1.7826	0.32898	0.210452	0.578176	-1.09956	0.328964	0.470591	0.815141	1.35326	0.328978	0.0686302	0.276293	-1.76179	0.328956	0.232346	0.730887	0.421895	0.32895	0.557811	0.968556	1.33137	0.328967	0.12245	0.493957	-4.01495	0.328951	0.000220751	0.0319561
ENSGALG00000003957	APOH	chr18	7724174	7733771	+	protein_coding	beta-2-glycoprotein 1 precursor [Source:RefSeq peptide;Acc:NP_001264923]	-3.13439	3.74461	3.75325e-06	0.000304996	-1.2664	3.74462	0.0410219	0.252251	3.55796	3.74461	5.313e-27	2.48188e-23	-1.66459	3.74462	0.0104732	0.157143	-1.80575	3.74462	0.00458173	0.147267	-1.61153	3.74461	0.0121506	0.154215	-2.60613	3.74462	1.27032e-05	0.00684705
ENSGALG00000001917	SSC4D	chr19	4217392	4226022	+	protein_coding	scavenger receptor cysteine rich family, 4 domains [Source:HGNC Symbol;Acc:HGNC:14461]	-4.99222	0.899525	0.00166359	0.0322693	0.0830744	0.89952	0.773386	0.94936	-1.14434	0.899525	0.357837	0.669928	-0.912403	0.899517	0.692977	0.961798	-0.400093	0.899515	0.945658	1	3.30262	0.899521	0.000400547	0.0199761	-5.03393	0.899515	0.000350237	0.0360899
ENSGALG00000004660	TRPV3	chr19	6685614	6699140	+	protein_coding	transient receptor potential cation channel, subfamily V, member 3 [Source:HGNC Symbol;Acc:HGNC:18084]	-4.60404	0.645692	0.00285316	0.0456962	4.97842	0.64575	8.73281e-09	4.07939e-06	-4.54468	0.645697	0.000121081	0.00287111	-3.00992	0.645783	0.10004	0.511167	-3.36521	0.645805	0.0554112	0.454112	0.101857	0.64574	0.757536	0.952038	-4.64536	0.645802	0.000679127	0.0455075
ENSGALG00000004074	KCNS1	chr20	5520686	5526950	+	protein_coding	potassium voltage-gated channel, modifier subfamily S, member 1 [Source:HGNC Symbol;Acc:HGNC:6300]	0.388112	0.33606	0.580198	0.871478	-3.29579	0.336031	0.0176077	0.159815	2.04518	0.336057	0.00779545	0.0632841	-0.287952	0.336016	0.996845	1	0.367631	0.336005	0.601187	0.976175	-3.97109	0.336037	0.00417005	0.0851155	-4.02371	0.336007	0.000440427	0.0382137
ENSGALG00000005352	GATA5	chr20	8368251	8377966	-	protein_coding	transcription factor GATA-5 [Source:RefSeq peptide;Acc:NP_990752]	2.0296	4.33763	0.00864512	0.0898093	1.89103	4.33764	0.0156484	0.150307	-1.39678	4.33763	0.123922	0.391401	0.281171	4.33764	0.644678	0.951302	-2.21987	4.33764	0.0869968	0.571279	-8.65948	4.33763	2.16857e-07	5.06506e-05	-5.04649	4.33764	0.000118134	0.0233172
ENSGALG00000005852	SRMS	chr20	9373970	9382871	-	protein_coding	src-related kinase lacking C-terminal regulatory tyrosine and N-terminal myristylation sites [Source:HGNC Symbol;Acc:HGNC:11298]	-4.06257	0.367922	0.00256328	0.0427706	0.912222	0.367924	0.300773	0.699641	-4.09916	0.367922	4.57356e-05	0.00136661	1.47363	0.367925	0.114632	0.546414	1.05965	0.367925	0.239409	0.838843	1.26435	0.367923	0.169634	0.576721	-4.10292	0.367925	0.000604621	0.0434521
ENSGALG00000005932	MYT1	chr20	9447729	9504782	-	protein_coding	myelin transcription factor 1 [Source:HGNC Symbol;Acc:HGNC:7622]	-6.34438	2.05964	0.00159833	0.0314977	-3.27735	2.05963	0.104149	0.414998	-6.70338	2.05964	8.74058e-07	5.49285e-05	0.956675	2.05963	0.330443	0.822419	-6.32048	2.05963	0.00173692	0.10301	4.60874	2.05963	9.52842e-07	0.000162843	-6.57629	2.05963	0.000111776	0.0227019
ENSGALG00000007796	BCAS1	chr20	12728166	12763432	+	protein_coding	breast carcinoma amplified sequence 1 [Source:HGNC Symbol;Acc:HGNC:974]	-0.072898	0.48013	1	1	-2.13419	0.480149	0.215316	0.600499	0.105027	0.480132	0.81635	0.931313	-4.27384	0.48016	0.00408047	0.10064	3.28154	0.480167	0.000303664	0.0512611	-4.27758	0.480146	0.00687182	0.112151	-4.33058	0.480166	0.000804075	0.0483618
ENSGALG00000004419	TNFRSF1B	chr21	5451978	5465671	-	protein_coding	tumor necrosis factor receptor superfamily member 1B precursor [Source:RefSeq peptide;Acc:NP_989770]	0.537633	1.82859	0.498223	0.828833	1.09477	1.82857	0.225184	0.61132	1.17692	1.82858	0.143468	0.424583	-2.32465	1.82856	0.1685	0.650692	-1.75067	1.82855	0.280886	0.87656	-0.00190317	1.82857	1	1	-6.29281	1.82855	8.60809e-06	0.00548335
ENSGALG00000000365	NKX2-6	chr22	1163640	1164119	+	protein_coding	homeobox protein Nkx-2.6 [Source:RefSeq peptide;Acc:NP_990468]	2.67428	2.64767	0.00227	0.0394198	1.2483	2.64769	0.168835	0.530862	-1.48477	2.64767	0.18109	0.479525	0.0831364	2.6477	0.778295	0.977535	-1.91389	2.6477	0.235174	0.833517	-7.20191	2.64768	5.14149e-05	0.0045033	-5.68414	2.6477	0.000310526	0.0359484
ENSGALG00000003444		chr22	2443241	2448175	+	protein_coding	Uncharacterized protein [Source:UniProtKB/TrEMBL;Acc:F1NPZ3]	-1.33533	-0.266796	0.276444	0.659081	-2.19629	-0.266792	0.0198636	0.171986	-2.20538	-0.266795	0.00191582	0.0225048	-0.57153	-0.26679	0.719351	0.970487	-0.358828	-0.266788	0.989835	1	0.336538	-0.266793	0.594023	0.896859	2.58729	-0.266789	0.000315575	0.0359484
ENSGALG00000028651		chr22	2753877	2755407	-	protein_coding	Uncharacterized protein [Source:UniProtKB/TrEMBL;Acc:R4GIN6]	-2.73818	-0.135793	0.0130417	0.114854	-2.73509	-0.13579	0.0129443	0.134471	-2.31515	-0.135792	0.0110573	0.0805391	-2.72443	-0.135788	0.0159544	0.197863	-0.304199	-0.135787	0.966111	1	-2.72672	-0.13579	0.0227635	0.211263	4.09453	-0.135787	1.0517e-08	2.45643e-05
ENSGALG00000004155	MYOM3	chr23	5584604	5609627	-	protein_coding	myomesin 3 [Source:HGNC Symbol;Acc:HGNC:26679]	1.62803	0.955688	0.0911682	0.369792	0.777365	0.955693	0.384487	0.76666	-0.656184	0.955688	0.622805	0.842524	0.183879	0.955695	0.709539	0.967519	-5.07751	0.955697	0.00144929	0.0962574	0.77615	0.955692	0.388866	0.794629	-5.12371	0.955697	0.000255376	0.0329328
ENSGALG00000000154	DENND2D	chr26	1012134	1019461	+	protein_coding	DENN/MADD domain containing 2D [Source:HGNC Symbol;Acc:HGNC:26192]	0.0776264	0.351629	0.7816	0.943116	3.4363	0.351641	4.77986e-05	0.00410951	-1.0563	0.35163	0.341354	0.656565	-3.30573	0.351647	0.0351639	0.300114	-0.367789	0.351652	0.926857	1	-4.02128	0.351639	0.00518972	0.0959482	-4.07376	0.351651	0.000576376	0.0425305
ENSGALG00000000560	PI16	chr26	1580563	1587475	+	protein_coding	peptidase inhibitor 16 [Source:HGNC Symbol;Acc:HGNC:21245]	1.33727	-0.366841	0.067136	0.308271	-1.63227	-0.366848	0.0594538	0.308823	-1.75197	-0.366842	0.00328078	0.0330531	-1.62421	-0.366852	0.0696284	0.426557	-1.62956	-0.366854	0.0648241	0.493184	-1.62362	-0.366847	0.0856948	0.414685	2.29343	-0.366854	0.000701261	0.0461383
ENSGALG00000001558	MOV10	chr26	3486369	3492328	+	protein_coding	putative helicase MOV-10 [Source:RefSeq peptide;Acc:NP_001012861]	-0.673285	1.34837	0.749046	0.933367	2.30846	1.34836	0.0116358	0.126955	0.204078	1.34836	0.735151	0.896455	1.16911	1.34836	0.208414	0.702939	-5.0678	1.34836	0.00262393	0.116736	-4.34417	1.34836	0.0141991	0.166656	-5.50396	1.34836	0.000125091	0.024014
ENSGALG00000021656	PTPN22	chr26	3688441	3701510	-	protein_coding	protein tyrosine phosphatase, non-receptor type 22 (lymphoid) [Source:HGNC Symbol;Acc:HGNC:9652]	-2.34156	-0.234463	0.0250634	0.171923	-2.33887	-0.234466	0.0248468	0.193782	-2.26132	-0.234463	0.00647607	0.0553973	1.5056	-0.234468	0.0794148	0.456114	-2.3369	-0.23447	0.0276068	0.316076	-2.33034	-0.234466	0.0408411	0.285318	2.77121	-0.234469	0.000310666	0.0359484
ENSGALG00000028262		chr26	5001119	5006673	+	protein_coding	Uncharacterized protein [Source:UniProtKB/TrEMBL;Acc:R4GKP2]	1.06186	-0.0244612	0.188118	0.546937	0.83741	-0.0244373	0.296463	0.696166	0.381883	-0.0244589	0.553432	0.805546	-3.10204	-0.024424	0.00410387	0.10064	0.00880951	-0.0244152	0.817638	0.991713	0.0198349	-0.0244417	0.852338	0.973966	-3.15493	-0.0244165	0.000749905	0.0469159
ENSGALG00000000824		chr27	1377744	1380297	+	protein_coding	Uncharacterized protein [Source:UniProtKB/TrEMBL;Acc:F1NCQ3]	-2.46342	0.596914	0.131261	0.453102	5.54411	0.596919	1.01703e-12	1.2957e-09	-3.35752	0.596914	0.00395481	0.0381045	-2.9542	0.596922	0.0791543	0.455178	-2.48493	0.596924	0.129444	0.671862	-2.38365	0.596918	0.166748	0.571461	-4.53879	0.596924	0.000408416	0.0381717
ENSGALG00000000251	CD79B	chr27	1622587	1627022	-	protein_coding	B-cell antigen receptor complex-associated protein beta chain precursor [Source:RefSeq peptide;Acc:NP_001006328]	-1.25975	-0.417976	0.107143	0.407132	-1.25869	-0.417984	0.107971	0.422303	-1.36142	-0.417977	0.00955245	0.072794	-1.25207	-0.417989	0.123777	0.567211	-1.25566	-0.417992	0.115947	0.645566	-1.25005	-0.417983	0.144357	0.536183	3.13343	-0.417991	4.31655e-12	1.5123e-08
ENSGALG00000000589	BTN1A1	chr28	803320	808851	-	protein_coding	butyrophilin subfamily 1 member A1 precursor [Source:RefSeq peptide;Acc:NP_001029989]	-1.03311	-0.348688	0.323524	0.70505	-1.533	-0.348702	0.074755	0.347699	0.316636	-0.34869	0.576393	0.820017	-1.51985	-0.348709	0.0909825	0.487853	-1.74604	-0.348714	0.0264324	0.310758	-1.73956	-0.348699	0.0355248	0.264811	2.38587	-0.348714	4.02739e-05	0.0134381
ENSGALG00000001486	ZAP70	chr28	1808517	1817532	+	protein_coding	zeta-chain (TCR) associated protein kinase 70kDa [Source:HGNC Symbol;Acc:HGNC:12858]	1.94544	0.500498	0.0416819	0.231339	-0.0474491	0.500494	1	1	-3.07402	0.500497	0.0118827	0.0847885	1.65707	0.500491	0.0903072	0.486455	-4.31401	0.50049	0.00370748	0.136832	0.538895	0.500494	0.506646	0.85924	-4.3593	0.50049	0.000827411	0.0489255
ENSGALG00000001898	MISP	chr28	2691783	2694367	+	protein_coding	mitotic spindle positioning [Source:HGNC Symbol;Acc:HGNC:27000]	-0.949193	0.173364	0.573121	0.866443	1.67578	0.173362	0.0551022	0.29614	1.43055	0.173363	0.061033	0.257996	-0.0109848	0.173361	1	1	-2.30055	0.17336	0.112853	0.639305	-3.61975	0.173362	0.00588634	0.103774	-3.67125	0.17336	0.000711325	0.0463651
ENSGALG00000027821	APC2	chr28	3104215	3111105	+	protein_coding	adenomatosis polyposis coli 2 [Source:HGNC Symbol;Acc:HGNC:24036]	-3.73388	0.211487	0.00325421	0.0497866	-3.73013	0.211508	0.00322507	0.0614078	5.06637	0.211489	1.04737e-14	4.89263e-12	-3.71832	0.211521	0.00420932	0.101581	-3.72924	0.211529	0.00370766	0.136832	-1.81341	0.211504	0.254732	0.679684	-3.77357	0.211527	0.00081347	0.0485702
ENSGALG00000002898	ALPK2	chrZ	767645	796574	-	protein_coding	alpha-kinase 2 [Source:HGNC Symbol;Acc:HGNC:20565]	4.24375	2.91603	6.95842e-06	0.000521472	-2.02079	2.91609	0.313544	0.709703	-4.04747	2.91604	0.00508048	0.0462324	-0.728942	2.91612	0.81608	0.983354	-1.81693	2.91614	0.368671	0.915384	-0.355834	2.91608	0.999652	1	-7.56436	2.91614	2.58428e-05	0.0109777
ENSGALG00000005814		chrZ	7513494	7521902	-	protein_coding	Uncharacterized protein [Source:UniProtKB/TrEMBL;Acc:F1NB98]	3.27741	0.488147	0.000310334	0.00988413	-0.487339	0.488374	0.875831	0.978301	-2.93422	0.48817	0.0129502	0.0903808	-0.571054	0.488501	0.852089	0.987672	-0.312688	0.488583	0.977857	1	-0.439451	0.488333	0.912934	0.991586	-4.43891	0.488571	0.000619324	0.0438925
ENSGALG00000002386	TMEM8B	chrZ	8938774	8946552	-	protein_coding	transmembrane protein 8B [Source:HGNC Symbol;Acc:HGNC:21427]	0.215613	0.604698	0.693284	0.916363	-0.614589	0.604682	0.779897	0.951599	-0.776365	0.604697	0.496438	0.773255	1.31862	0.604672	0.152015	0.622684	-0.00970372	0.604666	1	1	1.1863	0.604685	0.191813	0.608709	-4.54395	0.604667	0.000219728	0.0319561
ENSGALG00000002854	PDZD2	chrZ	9316120	9506598	-	protein_coding	PDZ domain containing 2 [Source:HGNC Symbol;Acc:HGNC:18486]	0.0793548	1.64649	0.792011	0.945274	0.661813	1.64649	0.421292	0.78754	-0.308378	1.64649	0.830403	0.936526	1.92016	1.64649	0.0344553	0.297309	-1.12091	1.64649	0.49355	0.957846	-0.586686	1.64649	0.790698	0.962654	-4.92804	1.64649	0.000619579	0.0438925
ENSGALG00000014835	C7	chrZ	12795475	12817485	+	protein_coding	complement component 7 [Source:HGNC Symbol;Acc:HGNC:1346]	7.48811	2.6105	2.50877e-15	1.67419e-12	-2.60479	2.61063	0.261331	0.65703	-5.01998	2.61051	0.00274792	0.0291517	-7.18647	2.61071	0.00162843	0.0611819	-7.19917	2.61075	0.00141584	0.0950667	-6.98932	2.61061	0.00610673	0.105307	-7.2464	2.61075	0.000256149	0.0329328
ENSGALG00000014742	HTR1A	chrZ	19853097	19854338	-	protein_coding	5-hydroxytryptamine receptor 1A [Source:RefSeq peptide;Acc:NP_001163999]	-0.969803	-0.450519	0.166317	0.51282	-0.968743	-0.450521	0.168664	0.530443	-1.05628	-0.45052	0.0208225	0.126652	-0.962828	-0.450522	0.190977	0.679451	-0.966267	-0.450523	0.178622	0.760729	0.139398	-0.450521	0.687668	0.930925	2.30177	-0.450522	3.71751e-06	0.00347315
ENSGALG00000010161	DMRT3	chrZ	25868099	25875676	+	protein_coding	doublesex and mab-3 related transcription factor 3 [Source:HGNC Symbol;Acc:HGNC:13909]	-3.36261	0.0729086	0.00941159	0.0944815	-3.35935	0.0728794	0.00915132	0.108974	-3.51778	0.0729057	0.000124718	0.00294242	-3.34829	0.0728631	0.0112431	0.162647	-0.136374	0.0728524	1	1	-1.26064	0.0728847	0.476377	0.845608	4.13983	0.072854	2.56902e-07	0.000327293
ENSGALG00000015422	NRG1	chrZ	53782385	54246036	-	protein_coding	Pro-neuregulin-1, membrane-bound isoform Neuregulin-1 [Source:UniProtKB/Swiss-Prot;Acc:Q05199]	0.360844	1.14586	0.594923	0.879789	-0.917322	1.14585	0.541107	0.851553	1.5649	1.14586	0.0310053	0.166096	-1.46647	1.14585	0.317502	0.812504	-4.16124	1.14585	0.00427177	0.143217	1.22027	1.14585	0.149029	0.544635	-4.3106	1.14585	0.000729509	0.0466819
ENSGALG00000014650	POLR3G	chrZ	59520651	59534206	-	protein_coding	polymerase (RNA) III (DNA directed) polypeptide G (32kD) [Source:HGNC Symbol;Acc:HGNC:30075]	-1.96961	-0.316323	0.0167178	0.134183	-0.318602	-0.316246	0.868147	0.976388	-1.02823	-0.316316	0.15536	0.443516	-1.95186	-0.316203	0.0219689	0.231688	0.635428	-0.316175	0.368929	0.915384	-1.58594	-0.31626	0.136673	0.523743	2.47254	-0.316179	0.000252892	0.0329328
ENSGALG00000001840	TEK	chrZ	68386224	68425628	+	protein_coding	TEK tyrosine kinase, endothelial [Source:HGNC Symbol;Acc:HGNC:11724]	-0.514009	2.51779	0.249372	0.627751	3.26058	2.51779	4.03482e-32	5.6544e-28	-0.0763991	2.51779	0.832126	0.93737	-2.22151	2.5178	5.73846e-06	0.00146216	-2.50546	2.5178	1.82245e-07	0.000319247	-2.6454	2.51779	1.17097e-07	2.98363e-05	-2.32001	2.5178	8.47522e-08	0.000131969
ENSGALG00000007468	HBAA	chr14_AADN03010595_random	5125	5931	-	protein_coding	Gallus gallus hemoglobin, alpha 1 (HBAA), mRNA. [Source:RefSeq mRNA;Acc:NM_001004376]	-2.15086	0.484019	0.0731511	0.326166	-3.88481	0.484006	0.00070585	0.0260411	3.39638	0.484018	5.19189e-09	6.27234e-07	0.683477	0.483999	0.353619	0.834003	-4.28045	0.483994	8.5712e-05	0.0235886	-4.27267	0.484009	0.000168463	0.011136	-4.17217	0.483995	3.17388e-05	0.0109862
ENSGALG00000007463	HBAD	chr14_AADN03010595_random	8017	9433	-	protein_coding	Gallus gallus alpha-D-globin (HBAD), mRNA. [Source:RefSeq mRNA;Acc:NM_001004375]	-0.81757	0.0183962	0.592764	0.878933	-3.22167	0.0183873	0.00201246	0.0482553	4.28611	0.0183953	1.64341e-14	6.77376e-12	-3.21057	0.0183823	0.00278133	0.082931	-3.21992	0.018379	0.00234289	0.111675	-3.21264	0.0183889	0.00394868	0.0822241	-3.26283	0.0183795	0.000445825	0.0382137
ENSGALG00000002720	AQP5	chrLGE22C19W28_E50C23	831420	835163	+	protein_coding	aquaporin 5 [Source:HGNC Symbol;Acc:HGNC:638]	-2.17059	-0.273521	0.0340703	0.207765	-2.16767	-0.273511	0.0337334	0.226625	-2.30633	-0.27352	0.00125328	0.0161727	-2.15766	-0.273505	0.0398639	0.319595	-2.166	-0.273501	0.0373183	0.37117	1.22033	-0.273513	0.14338	0.535269	2.94961	-0.273502	0.000169301	0.0276037
ENSGALG00000028182		chrLGE64	693515	696487	-	protein_coding	Uncharacterized protein [Source:UniProtKB/TrEMBL;Acc:R4GKE7]	2.48716	0.774724	0.00268305	0.04408	-0.867697	0.774712	0.592106	0.875603	-0.278402	0.774723	0.842009	0.940831	0.217864	0.774705	0.692906	0.961798	-3.54705	0.7747	0.0151151	0.243964	0.062007	0.774714	0.803324	0.965475	-4.6788	0.774701	0.00014134	0.0257239
ENSGALG00000027687		chrUn_AADN03019172	904	6300	+	protein_coding	Uncharacterized protein [Source:UniProtKB/TrEMBL;Acc:R4GKB2]	1.05037	0.0178274	0.0749528	0.330752	-0.521492	0.0178419	0.58609	0.873215	2.05029	0.0178288	8.82567e-06	0.000381738	-1.72901	0.01785	0.0435507	0.333326	-2.09986	0.0178553	0.0105781	0.20335	-2.41	0.0178393	0.00334584	0.0753908	-2.53226	0.0178546	0.000514131	0.0403929
ENSGALG00000001305		chrUn_AADN03019707	616	9422	-	protein_coding	Linker for activation of T-cells family member 2 [Source:UniProtKB/Swiss-Prot;Acc:Q5S7W5]	-0.0881054	0.0455652	1	1	1.59306	0.0455789	0.0535896	0.291879	-1.16229	0.0455665	0.228395	0.542588	1.29095	0.0455866	0.122462	0.565465	-0.0895945	0.0455916	1	1	-0.791508	0.0455764	0.600511	0.900156	-3.35279	0.0455909	0.000569601	0.0425305
ENSGALG00000025934		chrUn_AADN03020527	624	10120	-	protein_coding	Uncharacterized protein [Source:UniProtKB/TrEMBL;Acc:R4GLW8]	0.281485	0.0303505	0.635968	0.895177	1.64223	0.0303259	0.0438853	0.261849	-1.62368	0.0303481	0.0735056	0.288355	1.71976	0.0303122	0.0380332	0.312186	-0.850714	0.0303032	0.560534	0.968556	-1.3755	0.0303304	0.319934	0.74217	-3.2887	0.0303045	0.000656335	0.0447894
ENSGALG00000029173	LAT2	chrUn_AADN03026509	79	6886	+	protein_coding	Gallus gallus linker for activation of T cells family, member 2 (LAT2), mRNA. [Source:RefSeq mRNA;Acc:NM_001007482]	-0.226669	0.10516	0.992688	1	1.5851	0.105157	0.0560918	0.298802	-0.986757	0.105159	0.319041	0.639178	1.86983	0.105156	0.0256173	0.251768	-1.2173	0.105155	0.440374	0.940669	-1.40828	0.105158	0.300154	0.725617	-3.50254	0.105155	0.000431746	0.0382137
ENSGALG00000026147	PLVAP	chrUn_JH375640	2147	5383	-	protein_coding	plasmalemma vesicle associated protein [Source:HGNC Symbol;Acc:HGNC:13635]	0.990447	0.344121	0.135694	0.462306	3.16136	0.344149	3.07332e-08	1.30514e-05	-2.4756	0.344123	0.000424145	0.00713562	-0.836081	0.344165	0.422815	0.87728	-1.41244	0.344176	0.140328	0.689611	-2.95745	0.344144	0.00469329	0.0908127	-2.91634	0.344174	0.000652868	0.0447894

## Sheet: HH15_leaders_v_all_other_invivo
ensid	Name	Chr	Start	End	Strand	Biotype	Description	HH15_Invasive_Front_v_other.log2fc	HH15_Invasive_Front_v_other.log2cpm	HH15_Invasive_Front_v_other.pval	HH15_Invasive_Front_v_other.padj	HH13_Invasive_Front_v_other.log2fc	HH13_Invasive_Front_v_other.log2cpm	HH13_Invasive_Front_v_other.pval	HH13_Invasive_Front_v_other.padj	HH11_Invasive_Front_v_other.log2fc	HH11_Invasive_Front_v_other.log2cpm	HH11_Invasive_Front_v_other.pval	HH11_Invasive_Front_v_other.padj	HH15_Leader_v_other.log2fc	HH15_Leader_v_other.log2cpm	HH15_Leader_v_other.pval	HH15_Leader_v_other.padj	HH13_Leader_v_other.log2fc	HH13_Leader_v_other.log2cpm	HH13_Leader_v_other.pval	HH13_Leader_v_other.padj	HH15_Trailer_v_other.log2fc	HH15_Trailer_v_other.log2cpm	HH15_Trailer_v_other.pval	HH15_Trailer_v_other.padj	HH13_Trailer_v_other.log2fc	HH13_Trailer_v_other.log2cpm	HH13_Trailer_v_other.pval	HH13_Trailer_v_other.padj
ENSGALG00000006473	PLXNA4	chr1	2226706	2647006	+	protein_coding	plexin A4 [Source:HGNC Symbol;Acc:HGNC:9102]	-2.18942	5.76914	0.0073924	0.0819597	-1.2868	5.76914	0.104895	0.416904	3.03223	5.76914	3.41771e-12	8.70832e-10	-3.07211	5.76914	0.0006195	0.0372604	-2.74005	5.76914	0.0012923	0.0932898	-2.0024	5.76914	0.0167831	0.180922	-0.190564	5.76914	0.834564	0.992118
ENSGALG00000023584	FAM19A5	chr1	16987071	17299542	+	protein_coding	family with sequence similarity 19 (chemokine (C-C motif)-like), member A5 [Source:HGNC Symbol;Acc:HGNC:21592]	-3.36811	0.158856	0.000586872	0.015908	1.49586	0.158879	0.0367489	0.237158	1.23857	0.158858	0.0422876	0.204422	-3.59172	0.158893	0.000246238	0.0218404	-0.720644	0.158901	0.526108	0.966434	-1.89467	0.158875	0.0947904	0.437586	0.0847298	0.1589	0.803104	0.988382
ENSGALG00000029113		chr1	24479734	24484331	+	protein_coding	Protein Wnt [Source:UniProtKB/TrEMBL;Acc:R4GKR2]	1.08084	0.352652	0.183811	0.541362	0.743566	0.352624	0.347352	0.736936	0.219611	0.352649	0.708412	0.883246	-4.00487	0.352609	0.000860609	0.0441779	-1.51644	0.352599	0.292998	0.882836	-4.00752	0.352629	0.00128614	0.0423006	0.841518	0.3526	0.275335	0.860058
ENSGALG00000009393	CAV1	chr1	24999077	25013429	-	protein_coding	caveolin-1 [Source:RefSeq peptide;Acc:NP_001099134]	-2.08432	-0.288737	0.0282369	0.185693	-2.08197	-0.288742	0.0282722	0.206788	-0.64155	-0.288738	0.469038	0.755095	2.93958	-0.288745	0.000128015	0.0145586	-2.07963	-0.288747	0.0313466	0.338519	-2.0733	-0.288741	0.0445365	0.296924	0.475526	-0.288746	0.472702	0.949877
ENSGALG00000010342	OTOGL	chr1	39690270	39781595	+	protein_coding	otogelin-like [Source:HGNC Symbol;Acc:HGNC:26901]	-2.57994	3.04869	0.0588267	0.285666	-3.26721	3.0487	0.0214489	0.179347	2.22875	3.04869	0.00137383	0.0174076	-7.20828	3.0487	7.60673e-06	0.00179667	-2.81696	3.04871	0.0434213	0.397465	-0.382594	3.0487	0.868133	0.979346	0.998061	3.0487	0.198297	0.782649
ENSGALG00000025889	RMST_6	chr1	46128770	46128971	+	misc_RNA	Rhabdomyosarcoma 2 associated transcript conserved region 6 [Source:RFAM;Acc:RF01967]	-2.04386	-0.216534	0.0663342	0.306296	-2.42402	-0.216525	0.0121681	0.130171	-0.831791	-0.216533	0.348535	0.662737	3.03694	-0.216521	5.84504e-05	0.0083584	-2.42213	-0.216518	0.0137365	0.234189	-2.41605	-0.216527	0.0206072	0.200649	0.66578	-0.216518	0.358512	0.9081
ENSGALG00000026407	RMST_7	chr1	46130937	46131200	+	misc_RNA	Rhabdomyosarcoma 2 associated transcript conserved region 7 [Source:RFAM;Acc:RF01968]	-1.89529	-0.325108	0.0346064	0.209673	-1.89282	-0.325102	0.0347991	0.229818	-0.353484	-0.325107	0.764903	0.90765	3.47495	-0.325099	1.15171e-06	0.000428847	-1.8907	-0.325097	0.0384361	0.375402	-1.88525	-0.325103	0.0529202	0.323548	-1.34267	-0.325098	0.139654	0.687992
ENSGALG00000012290	SOX10	chr1	50911765	50921215	+	protein_coding	Transcription factor SOX-10 [Source:UniProtKB/Swiss-Prot;Acc:Q9W757]	-7.5226	7.88651	4.09105e-19	4.41015e-16	-1.60336	7.88651	0.0117174	0.127293	1.74447	7.88651	3.97786e-06	0.00019768	-3.66242	7.88651	7.75805e-07	0.000334738	-0.738926	7.88651	0.231727	0.829571	0.579227	7.88651	0.227299	0.652071	0.443818	7.88651	0.313234	0.886684
ENSGALG00000003213	LGALS2	chr1	51050593	51062352	+	protein_coding	lectin, galactoside-binding, soluble, 2 [Source:HGNC Symbol;Acc:HGNC:6562]	0.773237	0.227074	0.319521	0.702174	0.204491	0.227093	0.70066	0.921112	0.883675	0.227076	0.200765	0.507428	-3.75226	0.227103	0.000852031	0.0441766	-0.165885	0.22711	1	1	-3.75573	0.22709	0.00124975	0.0416999	0.18053	0.227109	0.740062	0.984175
ENSGALG00000012975	IQSEC3	chr1	60139733	60238559	+	protein_coding	IQ motif and Sec7 domain 3 [Source:HGNC Symbol;Acc:HGNC:29193]	-3.87641	1.16574	0.00180108	0.0336986	-0.107878	1.16573	1	1	1.5504	1.16574	0.0168561	0.108209	-4.26462	1.16572	0.000899722	0.0450311	-0.0659103	1.16572	1	1	-0.387952	1.16573	0.827691	0.969352	0.340247	1.16572	0.588448	0.969529
ENSGALG00000012989	NINJ2	chr1	60503834	60505016	-	protein_coding	ninjurin 2 [Source:HGNC Symbol;Acc:HGNC:7825]	0.122119	0.899767	0.771099	0.940392	-0.339287	0.899775	0.892085	0.982579	1.35181	0.899767	0.0536017	0.238317	-4.98147	0.89978	8.55531e-05	0.0111013	-0.889985	0.899783	0.523778	0.96537	0.354418	0.899774	0.594681	0.897265	-0.614258	0.899783	0.629874	0.973473
ENSGALG00000028186	RERG	chr1	62779916	62887409	-	protein_coding	RAS-like, estrogen-regulated, growth inhibitor [Source:HGNC Symbol;Acc:HGNC:15980]	-0.270794	2.55953	0.748428	0.933367	0.723117	2.55952	0.180673	0.551005	-3.14974	2.55953	1.19289e-07	9.4984e-06	2.37405	2.55952	2.36245e-06	0.000752442	-0.799749	2.55951	0.28147	0.87656	0.421592	2.55952	0.426536	0.818806	-2.84456	2.55951	6.81796e-05	0.0173722
ENSGALG00000026373	KCNJ8	chr1	67102759	67111591	+	protein_coding	potassium channel, inwardly rectifying subfamily J, member 8 [Source:HGNC Symbol;Acc:HGNC:6269]	-0.183895	1.7612	1	1	1.24455	1.76119	0.153566	0.506607	0.215031	1.7612	0.72079	0.889891	-5.94119	1.76119	0.00017957	0.018469	-0.749506	1.76119	0.669919	0.981678	0.422713	1.76119	0.559911	0.883258	-0.161514	1.76119	1	1
ENSGALG00000011930		chr1	75817331	75854119	-	protein_coding	Uncharacterized protein [Source:UniProtKB/TrEMBL;Acc:F1NEW8]	-0.577952	1.46332	0.832221	0.958355	0.760598	1.46334	0.395385	0.772097	1.77177	1.46332	0.0402	0.197118	-5.78063	1.46334	0.000770703	0.0425222	0.504443	1.46335	0.528324	0.966763	-1.75	1.46333	0.353446	0.767461	-5.83956	1.46335	9.06842e-05	0.02046
ENSGALG00000014966	HGD	chr1	79233824	79252458	+	protein_coding	homogentisate 1,2-dioxygenase [Source:HGNC Symbol;Acc:HGNC:4892]	0.667742	-0.124277	0.410002	0.775224	-1.21734	-0.124262	0.439534	0.798653	-2.93518	-0.124276	0.000321868	0.00584281	3.51269	-0.124254	4.40474e-05	0.0067833	-2.78218	-0.124249	0.0175589	0.257633	-0.959211	-0.124265	0.626119	0.909174	-2.82339	-0.12425	0.00565695	0.122909
ENSGALG00000015358	myosin	chr1	86879998	86923778	-	protein_coding	myosin heavy chain, cardiac muscle isoform [Source:RefSeq peptide;Acc:NP_990097]	6.06334	6.20652	4.36631e-30	3.05947e-26	-2.57961	6.20652	0.0200859	0.173435	-2.90246	6.20652	0.000429857	0.00720576	-4.34933	6.20652	0.000558138	0.0347633	-5.19653	6.20652	4.20868e-05	0.0168515	-4.23789	6.20652	0.000621472	0.0268774	-3.76838	6.20652	0.000357425	0.0365617
ENSGALG00000015679	SAMSN1	chr1	97445928	97480511	-	protein_coding	SAM domain-containing protein SAMSN-1 [Source:RefSeq peptide;Acc:NP_001006256]	-3.40507	0.0870365	0.00724156	0.0808632	-3.40174	0.087016	0.00711489	0.0924078	-2.89435	0.0870345	0.00511171	0.046396	3.04529	0.0870046	0.000600614	0.0362802	-3.40048	0.0869971	0.00804543	0.179578	1.05626	0.0870197	0.24032	0.663354	0.187243	0.0869982	0.71999	0.981811
ENSGALG00000018244	gga-mir-125b-2	chr1	98380668	98380757	+	miRNA	gga-mir-125b-2 [Source:miRBase;Acc:MI0001175]	-0.000808009	-0.114959	0.903818	0.983342	1.05853	-0.114962	0.0260636	0.197898	0.187631	-0.11496	0.628974	0.845967	-2.20973	-0.114964	0.000817653	0.0436928	0.064587	-0.114965	0.918941	1	-0.196331	-0.114962	0.811671	0.96623	-0.350473	-0.114965	0.511894	0.956229
ENSGALG00000015982		chr1	104711822	104731215	+	protein_coding	Uncharacterized protein [Source:UniProtKB/TrEMBL;Acc:F1P3P6]	-4.15451	0.625418	0.00444793	0.0605765	-4.16208	0.625397	0.00460975	0.0732438	-0.612227	0.625416	0.598248	0.831456	2.99981	0.625385	0.000477929	0.0320041	-0.654205	0.625378	0.744709	0.989384	-0.50884	0.625401	0.843154	0.972427	-0.244461	0.625379	0.957826	1
ENSGALG00000016055	KCNJ15	chr1	106882440	106907061	+	protein_coding	potassium channel, inwardly rectifying subfamily J, member 15 [Source:HGNC Symbol;Acc:HGNC:6261]	0.216986	2.83693	0.698359	0.918375	-0.599643	2.83693	0.773734	0.94936	1.14334	2.83693	0.148344	0.433196	-7.16671	2.83693	5.5902e-05	0.00816052	0.245093	2.83694	0.67906	0.984317	-3.41919	2.83693	0.043999	0.295307	0.585433	2.83694	0.45833	0.943435
ENSGALG00000016138	DSCAM	chr1	107601010	107978889	-	protein_coding	Down syndrome cell adhesion molecule [Source:HGNC Symbol;Acc:HGNC:3039]	1.18348	0.187797	0.196141	0.556952	-3.65306	0.187776	0.00616321	0.0850107	-3.81488	0.187795	5.94239e-05	0.0016393	3.01687	0.187765	0.000922554	0.0452052	-3.65201	0.187757	0.00697339	0.167051	0.138659	0.18778	0.744215	0.948866	-1.71118	0.187759	0.227058	0.824137
ENSGALG00000016145	RIPK4	chr1	108376953	108397821	-	protein_coding	receptor-interacting serine-threonine kinase 4 [Source:HGNC Symbol;Acc:HGNC:496]	1.51651	1.80546	0.103731	0.400024	-1.35324	1.80547	0.434925	0.796447	-0.40644	1.80546	0.774004	0.912348	-6.21158	1.80547	0.000209571	0.0203715	1.55165	1.80547	0.0981183	0.603255	-1.34026	1.80547	0.454916	0.835433	-0.434274	1.80547	0.847973	0.992637
ENSGALG00000016169	TMPRSS3	chr1	108738273	108751340	-	protein_coding	transmembrane protease, serine 3 [Source:HGNC Symbol;Acc:HGNC:11877]	-3.03473	-0.0434929	0.0126635	0.112821	-3.0316	-0.0435099	0.0124066	0.131717	0.178719	-0.0434945	0.75095	0.901547	3.68461	-0.0435194	1.73904e-05	0.00353201	-3.03013	-0.0435256	0.0139175	0.234989	-3.0227	-0.0435068	0.0227542	0.211263	-1.9783	-0.0435247	0.152993	0.711364
ENSGALG00000016222	NDP	chr1	110522886	110531383	+	protein_coding	norrin precursor [Source:RefSeq peptide;Acc:NP_001265015]	-0.498634	2.05956	0.754708	0.935203	-0.0591979	2.05956	1	1	2.53927	2.05956	0.000125534	0.00295669	-6.05481	2.05956	2.84095e-05	0.00503963	-3.85606	2.05956	0.00545487	0.155889	-1.57634	2.05956	0.237683	0.660449	-0.743209	2.05956	0.538878	0.962793
ENSGALG00000016258		chr1	112385725	112404316	-	protein_coding	Uncharacterized protein [Source:UniProtKB/TrEMBL;Acc:F1NUG3]	-1.95804	-0.312327	0.0384435	0.221707	-1.95591	-0.312335	0.0383785	0.242247	-2.08684	-0.312328	0.00152185	0.0188736	3.00849	-0.31234	8.52982e-05	0.0111013	-1.95345	-0.312343	0.0422823	0.391262	-1.94706	-0.312334	0.0589797	0.342821	1.02265	-0.312342	0.169711	0.738917
ENSGALG00000016780	RFX8	chr1	132861202	132895021	-	protein_coding	RFX family member 8, lacking RFX DNA binding domain [Source:HGNC Symbol;Acc:HGNC:37253]	-3.2653	0.243441	0.0028494	0.0456881	-0.83787	0.243447	0.492386	0.828168	1.81723	0.243442	0.00326323	0.0329949	-3.53867	0.24345	0.00103557	0.0480546	-2.60988	0.243452	0.0173869	0.257025	1.67323	0.243446	0.0236576	0.215564	-1.37365	0.243452	0.164841	0.731073
ENSGALG00000016833	F7	chr1	136938052	136946321	-	protein_coding	coagulation factor VII precursor [Source:RefSeq peptide;Acc:NP_989773]	-3.80494	0.246689	0.00503875	0.0649017	-2.13816	0.246695	0.178414	0.545937	-0.331378	0.24669	0.843259	0.940879	3.23999	0.246697	0.000341015	0.0268482	-3.80039	0.246699	0.00559483	0.155889	0.748328	0.246694	0.387374	0.793664	-3.84477	0.246699	0.00137492	0.0607829
ENSGALG00000016912	EDNRB	chr1	153125273	153143030	+	protein_coding	endothelin receptor type B precursor [Source:RefSeq peptide;Acc:NP_001001127]	-2.59746	5.58826	0.000725093	0.0186791	-0.150065	5.58826	0.894538	0.982604	1.46742	5.58826	0.000793267	0.0114843	-3.31584	5.58826	7.41467e-05	0.0101872	-0.575872	5.58826	0.434003	0.938626	0.035246	5.58826	0.868152	0.979346	0.35709	5.58826	0.460174	0.943891
ENSGALG00000019054	NAALAD2	chr1	186813786	186845023	-	protein_coding	N-acetylated alpha-linked acidic dipeptidase 2 [Source:HGNC Symbol;Acc:HGNC:14526]	1.18007	0.329867	0.078649	0.338717	-0.246564	0.32986	0.882802	0.98078	1.10739	0.329866	0.0528193	0.236262	-3.9667	0.329856	3.13934e-05	0.00536521	-0.896359	0.329854	0.386249	0.921064	-3.26904	0.329861	0.00177397	0.051616	0.0546893	0.329854	0.85068	0.993237
ENSGALG00000017345	HBG1	chr1	193716133	193717673	+	protein_coding	Hemoglobin subunit rho [Source:UniProtKB/Swiss-Prot;Acc:P02127]	-4.31005	0.61145	4.56055e-07	5.50962e-05	-1.58307	0.611453	0.0571198	0.301725	3.87403	0.61145	4.20415e-24	1.47293e-20	-3.32791	0.611454	0.000227495	0.0209744	-2.57261	0.611455	0.00323451	0.128857	-2.13589	0.611452	0.0145348	0.168478	-1.32349	0.611455	0.0730586	0.519387
ENSGALG00000023647	Gbx-1	chr2	173804	179883	+	protein_coding	Transcription factor Gbx-1 [Source:UniProtKB/TrEMBL;Acc:Q9DEB1]	-0.800739	0.772878	0.207361	0.573785	1.24907	0.772921	0.0112342	0.124874	-0.157247	0.772882	0.774773	0.912716	-2.35207	0.772945	0.000760298	0.0423136	0.569578	0.772961	0.255728	0.857388	-0.823042	0.772913	0.21493	0.637197	0.364111	0.772959	0.426555	0.936597
ENSGALG00000004919	SSPO	chr2	407640	442670	+	protein_coding	SCO-spondin [Source:HGNC Symbol;Acc:HGNC:21998]	-2.53088	-0.18693	0.0204751	0.150892	0.430013	-0.186948	0.545205	0.853878	-2.67343	-0.186932	0.000499718	0.00803585	4.02906	-0.186959	2.97423e-07	0.000179803	-2.52624	-0.186966	0.0225388	0.285399	-2.51898	-0.186945	0.0345682	0.260029	-2.56595	-0.186965	0.0076849	0.146326
ENSGALG00000006379	SHH	chr2	8080091	8089855	-	protein_coding	sonic hedgehog protein precursor [Source:RefSeq peptide;Acc:NP_990152]	0.167908	1.17046	0.714046	0.923008	-1.74014	1.17046	0.0343026	0.228477	-1.04075	1.17046	0.0751553	0.290866	3.13204	1.17047	2.05233e-10	2.61467e-07	-2.54555	1.17047	0.00212996	0.107134	-2.30579	1.17046	0.00643959	0.108102	-0.716424	1.17047	0.328298	0.89214
ENSGALG00000007426	MKX	chr2	15606690	15649798	+	protein_coding	mohawk homeobox [Source:HGNC Symbol;Acc:HGNC:23729]	-3.5879	0.240224	0.00775484	0.0845043	-3.40675	0.240207	0.0149306	0.146116	-0.764768	0.240222	0.489384	0.76851	3.11874	0.240198	0.000261463	0.0224794	1.32642	0.240191	0.134635	0.680841	-3.76795	0.24021	0.00566758	0.100978	-3.82	0.240192	0.000668876	0.0452832
ENSGALG00000010770	SCIN	chr2	26871392	26920922	+	protein_coding	Adseverin [Source:UniProtKB/Swiss-Prot;Acc:Q5ZIV9]	-0.149592	4.08512	0.980497	1	-2.82425	4.08513	0.0387894	0.244008	1.81162	4.08512	0.00904868	0.0700985	-8.31243	4.08513	6.09504e-07	0.000275535	0.411797	4.08513	0.552121	0.968556	-0.731478	4.08513	0.628835	0.909871	-0.438353	4.08513	0.759421	0.985936
ENSGALG00000011202	COLQ	chr2	34463938	34490356	-	protein_coding	collagen-like tail subunit (single strand of homotrimer) of asymmetric acetylcholinesterase [Source:HGNC Symbol;Acc:HGNC:2226]	1.42142	1.54904	0.123709	0.43881	-4.33681	1.54903	0.0107406	0.120899	0.875629	1.54904	0.276867	0.598432	-5.88314	1.54902	0.000282887	0.0237388	-5.89527	1.54901	0.000219399	0.040536	0.70844	1.54903	0.409301	0.808878	0.191811	1.54901	0.724671	0.981811
ENSGALG00000011314	LRRC3B	chr2	38757266	38807866	+	protein_coding	leucine rich repeat containing 3B [Source:HGNC Symbol;Acc:HGNC:28105]	-3.46858	0.0961089	0.0045283	0.0610188	0.228808	0.0961553	0.687074	0.916341	-0.846326	0.0961134	0.42994	0.725401	2.96658	0.0961812	0.000689454	0.0395489	0.224469	0.0961981	0.669923	0.981678	-1.87341	0.0961468	0.226776	0.651549	-3.50771	0.0961957	0.00122259	0.0569315
ENSGALG00000012927	CDH10	chr2	72176697	72272302	+	protein_coding	cadherin-10 precursor [Source:RefSeq peptide;Acc:NP_999838]	-5.88685	1.68944	0.000619797	0.016513	-1.21384	1.68945	0.506112	0.834613	1.69012	1.68944	0.0438315	0.209715	-6.06843	1.68945	0.000337311	0.026721	-5.50725	1.68945	0.00201856	0.104846	2.23661	1.68945	0.0186435	0.189738	-1.65919	1.68945	0.279591	0.863503
ENSGALG00000027026		chr2	78319552	78332004	+	protein_coding	Uncharacterized protein [Source:UniProtKB/TrEMBL;Acc:R4GI33]	-4.33777	0.743862	0.00180505	0.0337279	-3.33711	0.743867	0.021735	0.180554	0.70212	0.743863	0.339608	0.654728	-4.73225	0.74387	0.000421699	0.0299984	-1.5273	0.743872	0.290442	0.88259	2.42717	0.743866	0.00393051	0.0819676	0.260432	0.743872	0.668436	0.976745
ENSGALG00000013081	VWC2	chr2	80447666	80505627	+	protein_coding	von Willebrand factor C domain containing 2 [Source:HGNC Symbol;Acc:HGNC:30200]	-0.914674	0.817875	0.60432	0.884059	-3.69803	0.817888	0.0178245	0.160949	0.61076	0.817876	0.424866	0.722346	-4.85538	0.817896	0.000870076	0.0445009	1.21443	0.817901	0.180534	0.762508	0.272057	0.817886	0.661822	0.92039	0.551512	0.8179	0.480724	0.951018
ENSGALG00000013640	MBP	chr2	90566391	90584146	+	protein_coding	Myelin basic protein [Source:UniProtKB/Swiss-Prot;Acc:P15720]	-1.6828	2.18273	0.169451	0.517517	-1.1899	2.18274	0.342961	0.733779	0.0997013	2.18273	0.82059	0.932795	-6.66397	2.18274	1.08896e-06	0.000423908	0.999204	2.18274	0.196607	0.789022	0.399665	2.18274	0.554326	0.882126	1.0923	2.18274	0.138761	0.687992
ENSGALG00000013782	CDH7	chr2	95477061	95554752	-	protein_coding	cadherin-7 precursor [Source:RefSeq peptide;Acc:NP_989518]	-4.73151	4.18258	4.65177e-05	0.00236195	-2.45211	4.18258	0.0197794	0.171527	1.97021	4.18258	0.000468425	0.00768677	-8.61206	4.18258	1.19827e-10	1.86584e-07	-1.23426	4.18258	0.223297	0.822629	1.16249	4.18258	0.0915266	0.428838	-0.143281	4.18258	0.946279	1
ENSGALG00000017398		chr2	105751170	105769043	+	protein_coding	Uncharacterized protein [Source:UniProtKB/TrEMBL;Acc:F1NTQ4]	-5.61877	1.32854	0.000766238	0.0193975	-0.644474	1.32856	0.812937	0.960743	2.87047	1.32854	0.00070433	0.0104671	-5.60222	1.32857	0.00103909	0.048059	-5.37819	1.32858	0.00219381	0.108636	-1.24627	1.32856	0.538331	0.874585	0.172537	1.32858	0.737639	0.983084
ENSGALG00000015526	MCMDC2	chr2	114970567	114979273	+	protein_coding	minichromosome maintenance domain containing 2 [Source:HGNC Symbol;Acc:HGNC:26368]	-0.296686	0.483343	0.908034	0.985151	0.321013	0.48334	0.616236	0.884557	0.385913	0.483342	0.54124	0.800099	-4.27243	0.483338	0.000223432	0.0207363	1.45903	0.483337	0.0631808	0.486225	-0.610337	0.48334	0.686528	0.930925	-0.876686	0.483337	0.454783	0.943398
ENSGALG00000016111	CSMD3	chr2	132812344	133381395	-	protein_coding	CUB and Sushi multiple domains 3 [Source:HGNC Symbol;Acc:HGNC:19291]	-3.45363	2.15618	2.30732e-07	3.05045e-05	1.58374	2.15618	0.000331526	0.0153333	0.470287	2.15618	0.21951	0.532221	-2.55745	2.15618	0.000152148	0.0161531	1.41506	2.15619	0.00159589	0.0989591	-1.23786	2.15618	0.0471509	0.306195	-2.06435	2.15619	0.00026283	0.0331829
ENSGALG00000016393		chr2	136958880	137037748	+	protein_coding	Uncharacterized protein [Source:UniProtKB/TrEMBL;Acc:F1NN15]	-4.18717	0.430708	0.000790139	0.0197029	-4.18343	0.430708	0.000802908	0.0285582	-0.865168	0.430708	0.404815	0.707935	3.52084	0.430707	8.84744e-06	0.00203259	-0.974694	0.430707	0.546533	0.968186	-1.5842	0.430708	0.304488	0.729043	-0.32745	0.430707	0.879692	0.994798
ENSGALG00000028280	FAM83A	chr2	137525083	137540453	+	protein_coding	family with sequence similarity 83, member A [Source:HGNC Symbol;Acc:HGNC:28210]	-0.767191	1.31503	0.564229	0.862321	-0.142964	1.3151	1	1	-0.095076	1.31504	0.979024	0.99943	-4.46773	1.31513	0.000916337	0.0452052	0.762524	1.31516	0.318708	0.894897	-0.086091	1.31509	1	1	1.05293	1.31515	0.157853	0.721217
ENSGALG00000016298	ADCY8	chr2	140457600	140575805	-	protein_coding	adenylate cyclase 8 (brain) [Source:HGNC Symbol;Acc:HGNC:239]	2.09004	2.43248	0.0121272	0.110072	-2.86765	2.43249	0.0529297	0.290489	1.25423	2.43248	0.0912226	0.325788	-6.7318	2.43249	2.73891e-05	0.00498481	-2.86111	2.43249	0.0513038	0.434746	-2.43478	2.43249	0.102946	0.456548	-0.18419	2.43249	0.981374	1
ENSGALG00000016233	TG	chr2	141333054	141469306	+	protein_coding	thyroglobulin [Source:HGNC Symbol;Acc:HGNC:11764]	-3.0275	0.142894	0.0120488	0.109841	-2.86781	0.142861	0.0208662	0.176795	0.70774	0.142891	0.320102	0.640227	3.08907	0.142843	9.23516e-05	0.0114532	-0.856097	0.142831	0.566724	0.968906	-3.53097	0.142867	0.00396519	0.0823232	-3.26831	0.142833	0.00340747	0.0936318
ENSGALG00000026747	GTF2A1L	chr3	7528251	7539974	-	protein_coding	TFIIA-alpha and beta-like factor [Source:RefSeq peptide;Acc:NP_001191795]	0.385788	0.869939	0.590546	0.877454	0.0993659	0.869947	0.772643	0.94936	1.58439	0.86994	0.0502491	0.228856	-4.93599	0.869951	0.000926706	0.0452504	0.9462	0.869954	0.287519	0.88259	-3.72325	0.869945	0.0257471	0.223834	-4.82949	0.869953	0.000364547	0.0368951
ENSGALG00000008996	ANKEF1	chr3	13109614	13123521	-	protein_coding	ankyrin repeat and EF-hand domain containing 1 [Source:HGNC Symbol;Acc:HGNC:15803]	2.48896	0.950038	0.00375594	0.0543196	0.250037	0.950024	0.674764	0.912402	-1.16822	0.950037	0.276946	0.598432	-5.05099	0.950016	0.000460147	0.0311522	0.844816	0.950011	0.323613	0.898265	-2.8075	0.950026	0.0798507	0.399686	-1.59993	0.950011	0.232829	0.826929
ENSGALG00000023601		chr3	13128374	13142969	-	protein_coding	Uncharacterized protein [Source:UniProtKB/TrEMBL;Acc:E1BXM0]	-2.75466	-0.128029	0.0151052	0.125183	0.285826	-0.128045	0.640072	0.895305	-1.52808	-0.128031	0.118298	0.381536	3.90484	-0.128053	1.36711e-06	0.000482086	-2.75	-0.128059	0.0166971	0.251606	-2.74273	-0.128042	0.0262385	0.226955	-2.79087	-0.128058	0.00530144	0.117468
ENSGALG00000028234	SYNDIG1	chr3	15008233	15108357	+	protein_coding	synapse differentiation inducing 1 [Source:HGNC Symbol;Acc:HGNC:15885]	-3.55989	2.87764	2.08231e-05	0.00125242	-1.16762	2.87763	0.118577	0.44207	0.54757	2.87764	0.234888	0.549583	2.17604	2.87763	2.82951e-05	0.00503963	-1.99421	2.87763	0.00983596	0.196916	-1.81937	2.87763	0.0212557	0.203734	0.247728	2.87763	0.599276	0.971516
ENSGALG00000010057	KIF6	chr3	28295093	28437362	+	protein_coding	kinesin family member 6 [Source:HGNC Symbol;Acc:HGNC:21202]	0.901404	0.0187699	0.165299	0.511707	-2.03147	0.0188012	0.0287195	0.208753	-1.18985	0.018773	0.0853238	0.313839	2.30984	0.0188186	0.000188614	0.0189162	-0.521516	0.01883	0.703984	0.98509	-1.12392	0.0187955	0.226207	0.651034	-1.02461	0.0188284	0.238038	0.832319
ENSGALG00000010691	C1orf101	chr3	34077463	34104237	-	protein_coding	chromosome 1 open reading frame 101 [Source:HGNC Symbol;Acc:HGNC:28491]	-2.19856	0.671611	0.130073	0.451081	0.958084	0.671597	0.262937	0.658429	0.912482	0.67161	0.227582	0.5413	-4.60439	0.671589	0.000725696	0.0413411	-0.348288	0.671584	0.920256	1	-0.262467	0.671599	0.98439	1	0.320404	0.671584	0.629903	0.973473
ENSGALG00000010812	RYR2	chr3	36498791	36661068	-	protein_coding	ryanodine receptor 2 (cardiac) [Source:HGNC Symbol;Acc:HGNC:10484]	4.25681	1.92598	3.42006e-06	0.000288727	-3.75071	1.92602	0.0548983	0.29613	-0.977331	1.92599	0.465685	0.753132	-6.36639	1.92603	0.000691063	0.0395489	-5.97663	1.92605	0.00233906	0.111675	-0.0689425	1.92601	1	1	-6.25268	1.92604	0.000223609	0.0319761
ENSGALG00000011086	ACTA1	chr3	39337939	39339803	-	protein_coding	Actin, alpha skeletal muscle [Source:UniProtKB/Swiss-Prot;Acc:P68139]	3.28257	5.6096	1.80187e-27	8.41716e-24	1.07191	5.6096	0.00418425	0.0700574	-2.21297	5.6096	6.91304e-09	8.07327e-07	-2.57976	5.60961	1.59077e-06	0.000543732	-1.98783	5.60961	7.70266e-05	0.0220296	-2.71669	5.6096	3.99057e-07	8.22409e-05	-2.07764	5.60961	5.25061e-06	0.00432836
ENSGALG00000011288	DACT2	chr3	41160297	41172875	+	protein_coding	dishevelled-binding antagonist of beta-catenin 2 [Source:HGNC Symbol;Acc:HGNC:21231]	-2.92642	7.84065	3.00382e-07	3.86197e-05	-1.40559	7.84065	0.00777589	0.0975572	1.55244	7.84065	1.70808e-06	9.4988e-05	-2.16958	7.84065	0.000142741	0.0155068	-0.65741	7.84065	0.200909	0.793822	0.531759	7.84065	0.20159	0.619895	0.356793	7.84065	0.347255	0.903505
ENSGALG00000012392	IYD	chr3	47713866	47731445	+	protein_coding	iodotyrosine deiodinase [Source:HGNC Symbol;Acc:HGNC:21071]	-1.71549	-0.25854	0.0931721	0.374527	1.2574	-0.258555	0.0983115	0.400622	-2.02276	-0.258541	0.00827031	0.0658523	3.00806	-0.258564	3.99298e-05	0.00621752	-2.2213	-0.25857	0.0195753	0.270349	-2.21439	-0.258553	0.0283666	0.234808	-1.79946	-0.258569	0.0429643	0.392198
ENSGALG00000013795	HIVEP2	chr3	52031852	52056523	+	protein_coding	human immunodeficiency virus type I enhancer binding protein 2 [Source:HGNC Symbol;Acc:HGNC:4921]	-0.442618	2.23482	0.850452	0.963607	-1.42892	2.23483	0.34943	0.73871	2.28278	2.23482	0.00236073	0.0262774	-6.72559	2.23484	2.34872e-05	0.0045089	-0.121543	2.23484	1	1	-3.79241	2.23483	0.0208823	0.202615	-0.212923	2.23484	0.968441	1
ENSGALG00000002911	MOXD1	chr3	56196431	56248904	+	protein_coding	DBH-like monooxygenase protein 1 precursor [Source:RefSeq peptide;Acc:NP_989955]	-3.62725	6.61007	1.14978e-08	2.33522e-06	-2.22295	6.61007	0.000187549	0.0102269	1.66294	6.61007	1.38753e-06	7.96917e-05	-2.14331	6.61007	0.000462849	0.0311845	-0.665574	6.61007	0.231732	0.829571	0.676262	6.61007	0.127494	0.505004	0.313413	6.61007	0.432887	0.939442
ENSGALG00000029004		chr3	56207362	56429310	+	protein_coding	Uncharacterized protein [Source:UniProtKB/TrEMBL;Acc:R4GFE9]	-3.5824	5.39046	1.90562e-08	3.56071e-06	-2.3566	5.39047	9.32392e-05	0.00637392	1.6434	5.39046	2.15441e-06	0.000114363	-2.12506	5.39047	0.000553651	0.0347633	-0.70999	5.39047	0.205868	0.799192	0.679354	5.39047	0.128338	0.50592	0.382167	5.39047	0.347659	0.903745
ENSGALG00000014913	ROS1	chr3	62908210	62980553	+	protein_coding	proto-oncogene tyrosine-protein kinase ROS precursor [Source:RefSeq peptide;Acc:NP_990588]	-4.06737	0.366499	0.00630379	0.0742364	-4.06349	0.366514	0.00607662	0.0845657	-4.22943	0.366501	6.17934e-05	0.00168805	4.74746	0.366523	1.97336e-07	0.000125703	-1.37691	0.366528	0.530792	0.967173	-4.05533	0.366512	0.0126165	0.156883	-0.344387	0.366527	0.936702	1
ENSGALG00000014917	VGLL2	chr3	62989673	62997520	-	protein_coding	transcription cofactor vestigial-like protein 2 [Source:RefSeq peptide;Acc:NP_001139462]	-2.55711	3.23429	0.129231	0.449724	-3.19503	3.2343	0.066368	0.328395	-1.55358	3.23429	0.182479	0.481754	3.19895	3.2343	0.000410837	0.0298074	0.984247	3.23431	0.280163	0.876385	-7.84161	3.2343	4.72844e-05	0.00430297	-0.788557	3.23431	0.632159	0.973979
ENSGALG00000015224	AK9	chr3	66269578	66325155	+	protein_coding	adenylate kinase 9 [Source:HGNC Symbol;Acc:HGNC:33814]	-3.91096	0.302798	0.00153882	0.0310408	-3.36183	0.302764	0.0150967	0.146956	0.52697	0.302795	0.462584	0.751198	3.03768	0.302745	0.00024183	0.0216858	-3.70048	0.302732	0.00521508	0.154395	-3.20312	0.30277	0.0327476	0.254852	-0.31355	0.302734	0.892845	0.995278
ENSGALG00000015593	EPHA7	chr3	73318964	73462488	+	protein_coding	Ephrin type-A receptor 7 [Source:UniProtKB/Swiss-Prot;Acc:O42422]	-0.617225	4.72509	0.510742	0.835279	-0.789492	4.72509	0.393852	0.771478	2.57945	4.72509	2.81997e-07	1.99592e-05	-3.76225	4.72509	0.000382474	0.0289729	-1.48734	4.72509	0.104018	0.618986	-0.822979	4.72509	0.384829	0.791127	-1.30876	4.72509	0.107872	0.624416
ENSGALG00000025559	gga-mir-1677	chr3	73379297	73379369	+	miRNA	gga-mir-1677 [Source:miRBase;Acc:MI0007411]	-1.07146	0.0404226	0.164609	0.510662	-1.44198	0.0404248	0.0758303	0.349683	2.30984	0.0404228	1.17608e-07	9.41805e-06	-2.79808	0.040426	0.000412633	0.0298074	-1.15193	0.0404268	0.134597	0.680841	-0.0537709	0.0404244	1	1	-0.765393	0.0404267	0.267293	0.858759
ENSGALG00000015970	COL9A1	chr3	82230623	82296804	+	protein_coding	collagen alpha-1(IX) chain precursor [Source:RefSeq peptide;Acc:NP_001094381]	-2.06102	6.7275	0.0001131	0.00473129	0.513902	6.7275	0.204821	0.586746	1.20472	6.7275	0.000220335	0.00436894	-2.07833	6.7275	0.000193618	0.0191136	-0.0206171	6.7275	0.974239	1	-0.816768	6.7275	0.114726	0.479239	0.11675	6.7275	0.726596	0.981811
ENSGALG00000016324	GSTA3	chr3	87785842	87793876	+	protein_coding	glutathione S-transferase alpha 3 [Source:RefSeq peptide;Acc:NP_990149]	-1.49507	1.93152	0.336287	0.715571	-1.44134	1.93151	0.361481	0.749935	-0.697118	1.93152	0.537404	0.798568	3.26277	1.93151	0.000116899	0.0138832	-0.0365355	1.93151	1	1	-2.54085	1.93151	0.113913	0.476957	-2.20508	1.93151	0.10598	0.619413
ENSGALG00000016341	CSMD1	chr3	88949756	89752149	+	protein_coding	CUB and Sushi multiple domains 1 [Source:HGNC Symbol;Acc:HGNC:14026]	-2.56612	2.65205	0.0402689	0.226093	-1.08253	2.65205	0.391148	0.770638	2.25803	2.65205	0.000497707	0.00801764	-7.19666	2.65204	3.18311e-07	0.000179803	-0.997963	2.65204	0.430434	0.937595	-2.23842	2.65205	0.0819819	0.403924	0.731778	2.65204	0.309534	0.886684
ENSGALG00000016478	MATN3	chr3	101078563	101093823	-	protein_coding	Matrilin-3 [Source:UniProtKB/Swiss-Prot;Acc:O42401]	-1.54143	0.669351	0.31045	0.693958	1.23949	0.669424	0.166879	0.528228	0.440333	0.669358	0.543665	0.801316	-4.63498	0.669465	0.000948521	0.045995	1.58088	0.669491	0.0794137	0.550398	-2.04625	0.669411	0.19393	0.610612	-1.09375	0.669487	0.427576	0.937577
ENSGALG00000016608	ADCY3	chr3	105072727	105085294	+	protein_coding	adenylate cyclase 3 [Source:HGNC Symbol;Acc:HGNC:234]	-2.09166	-0.287852	0.029402	0.190936	-2.08916	-0.287852	0.0293539	0.211036	-0.96155	-0.287852	0.284959	0.605508	2.62767	-0.287852	0.000939324	0.0457073	-2.087	-0.287853	0.0325724	0.345548	1.26051	-0.287852	0.112713	0.474697	-1.2996	-0.287853	0.210819	0.801308
ENSGALG00000016626	FBXO16	chr3	105432483	105455360	-	protein_coding	F-box protein 16 [Source:HGNC Symbol;Acc:HGNC:13618]	3.40521	1.04976	0.000103811	0.00446261	-1.9323	1.04998	0.246948	0.63922	-1.12061	1.04978	0.335675	0.651364	-5.27537	1.05009	0.000766469	0.0424557	-0.451226	1.05017	0.885971	0.998615	-0.820681	1.04994	0.696639	0.933134	-1.33532	1.05016	0.366173	0.909532
ENSGALG00000016661	BLK	chr3	106862804	106898321	+	protein_coding	BLK proto-oncogene, Src family tyrosine kinase [Source:HGNC Symbol;Acc:HGNC:1057]	0.622811	0.0402927	0.370937	0.74661	-2.11752	0.0402743	0.0439762	0.262137	-1.89863	0.0402909	0.012284	0.0869432	3.65706	0.040264	2.55583e-09	2.98478e-06	-3.27863	0.0402573	0.00056389	0.065853	-2.09017	0.0402777	0.0581471	0.340097	-2.38577	0.0402583	0.00922223	0.162158
ENSGALG00000016709	RCAN2	chr3	109338625	109369202	-	protein_coding	regulator of calcineurin 2 [Source:HGNC Symbol;Acc:HGNC:3041]	2.15225	2.79899	0.000168685	0.00638879	-1.13298	2.799	0.191681	0.564999	0.82661	2.79899	0.111569	0.367802	-3.48141	2.799	0.000450191	0.0306696	-2.21178	2.79901	0.0150765	0.243765	-1.29397	2.799	0.147178	0.541067	-0.624723	2.79901	0.431102	0.938715
ENSGALG00000004346	P2RY4	chr4	1201825	1206371	-	protein_coding	pyrimidinergic receptor P2Y, G-protein coupled, 4 [Source:HGNC Symbol;Acc:HGNC:8542]	-4.63594	0.89611	0.00310791	0.0480731	-1.12913	0.896126	0.506339	0.834613	2.81572	0.896111	0.000295435	0.00543337	-4.97926	0.896135	0.000826789	0.0437231	-1.03979	0.896141	0.550258	0.968556	-4.98316	0.896123	0.00137787	0.0443896	0.317674	0.89614	0.64109	0.974019
ENSGALG00000000112	PLP1	chr4	1977381	1981476	-	protein_coding	myelin proteolipid protein [Source:RefSeq peptide;Acc:NP_990608]	-4.35486	0.519235	0.000171415	0.00642304	-3.51604	0.519232	0.0044531	0.0723966	0.365348	0.519235	0.571369	0.81725	-4.33913	0.51923	0.000286937	0.0239354	-0.284899	0.519228	0.947597	1	1.90158	0.519232	0.0175541	0.183996	0.90708	0.519229	0.230499	0.826086
ENSGALG00000004936	GLRA4	chr4	1989272	1995319	+	protein_coding	glycine receptor, alpha 4 [Source:HGNC Symbol;Acc:HGNC:31715]	-0.965975	1.53192	0.538176	0.847941	-2.97142	1.53192	0.0489592	0.27959	0.432242	1.53192	0.537104	0.798568	-5.64015	1.53191	0.000280223	0.0237388	-0.785436	1.53191	0.643321	0.980375	1.0644	1.53192	0.222237	0.647357	1.40708	1.53191	0.0906618	0.580726
ENSGALG00000005541	GJB1	chr4	2294855	2295694	-	protein_coding	gap junction protein, beta 1, 32kDa [Source:RefSeq peptide;Acc:NP_989702]	-1.45252	3.99386	0.0145934	0.122609	-1.09152	3.99386	0.0631324	0.318595	1.91772	3.99386	5.22405e-08	4.63353e-06	-2.42356	3.99386	0.000195037	0.0191136	-0.404299	3.99387	0.503018	0.960264	-1.38552	3.99386	0.0229459	0.212394	0.34512	3.99387	0.408624	0.930374
ENSGALG00000006877	KLHL4	chr4	8058003	8091302	-	protein_coding	kelch-like family member 4 [Source:HGNC Symbol;Acc:HGNC:6355]	-1.29481	2.58142	0.580299	0.871537	6.5239	2.58143	1.77061e-12	2.06778e-09	-7.18897	2.58142	3.84481e-06	0.000192433	-7.12016	2.58143	0.000989709	0.0474993	-4.17407	2.58143	0.0599475	0.472488	-7.1243	2.58143	0.00194526	0.0541795	-7.1798	2.58143	0.000129844	0.0245896
ENSGALG00000007123		chr4	9317485	9318803	-	protein_coding	Uncharacterized protein [Source:UniProtKB/TrEMBL;Acc:E1C5W4]	0.416521	-0.243192	0.536833	0.84711	-0.884499	-0.243192	0.516212	0.841525	-2.44412	-0.243192	0.000349491	0.00616072	3.07707	-0.243191	5.74079e-05	0.00829396	-2.30085	-0.243191	0.0195337	0.270314	-1.06913	-0.243192	0.435087	0.823154	-0.868362	-0.243191	0.431607	0.938798
ENSGALG00000028222		chr4	10958322	10963381	-	protein_coding	Uncharacterized protein [Source:UniProtKB/TrEMBL;Acc:R4GHB4]	-3.95208	0.3213	0.00456654	0.0614112	-3.94848	0.321272	0.00446596	0.0723966	-4.11279	0.321297	3.2661e-05	0.00105952	3.33737	0.321257	0.000235308	0.0214213	-0.107987	0.321247	1	1	-3.93963	0.321277	0.00920392	0.131658	0.952383	0.321248	0.277926	0.861929
ENSGALG00000007740		chr4	12254176	12258981	-	protein_coding	Uncharacterized protein [Source:UniProtKB/TrEMBL;Acc:E1C3T1]	-3.63579	0.270398	7.1657e-05	0.0033142	-0.628498	0.270417	0.546507	0.854535	1.93594	0.2704	0.000363805	0.00637313	-3.8463	0.270428	3.0675e-05	0.00530716	0.408017	0.270434	0.504684	0.960425	-1.40555	0.270414	0.159209	0.560872	0.0602415	0.270433	0.852713	0.993237
ENSGALG00000009239	TLR2-2	chr4	19209334	19210887	+	protein_coding	toll-like receptor 2 type-2 precursor [Source:RefSeq peptide;Acc:NP_001155122]	-1.28294	0.174502	0.288787	0.672335	-0.227428	0.1745	0.962478	1	1.53165	0.174502	0.021553	0.129355	-3.62061	0.174498	0.00082388	0.0437231	0.32601	0.174498	0.598005	0.975715	-2.45644	0.1745	0.0483084	0.309695	0.341831	0.174498	0.60162	0.971516
ENSGALG00000009237		chr4	19505914	19508259	+	protein_coding	Uncharacterized protein [Source:UniProtKB/TrEMBL;Acc:R9PXN2]	-1.74485	1.87534	0.261151	0.641727	0.0858433	1.87535	0.784784	0.952894	1.57064	1.87534	0.0470779	0.219551	-6.29919	1.87536	8.67581e-05	0.0111544	0.285766	1.87536	0.649442	0.981589	-1.96228	1.87535	0.228327	0.653304	0.22257	1.87536	0.704629	0.979226
ENSGALG00000009870	IL15	chr4	29463073	29495702	+	protein_coding	interleukin 15 [Source:RefSeq peptide;Acc:NP_989902]	-1.79474	-0.342191	0.0494047	0.257755	0.844906	-0.342189	0.276169	0.672968	-1.91931	-0.342191	0.0023974	0.0264841	2.90372	-0.342188	0.000187618	0.0189162	-0.57858	-0.342187	0.909064	1	-1.78505	-0.342189	0.0736718	0.383663	-1.8249	-0.342187	0.0225655	0.266414
ENSGALG00000010125	CSGALNACT1	chr4	33528138	33541938	-	protein_coding	chondroitin sulfate N-acetylgalactosaminyltransferase 1 [Source:HGNC Symbol;Acc:HGNC:24290]	-1.22242	2.39018	0.301446	0.686788	-0.559259	2.39017	0.682451	0.915521	1.32517	2.39018	0.0414516	0.201492	-6.08569	2.39017	1.20842e-05	0.00265756	-0.745859	2.39017	0.55634	0.968556	-0.975644	2.39017	0.438141	0.825047	1.10863	2.39017	0.121745	0.655195
ENSGALG00000025851	GPRIN3	chr4	34693911	34696151	-	protein_coding	GPRIN family member 3 [Source:HGNC Symbol;Acc:HGNC:27733]	-0.318203	0.84002	0.914832	0.988359	-0.189333	0.84001	1	1	0.0574002	0.840019	0.864316	0.950202	-4.88216	0.840005	0.000180552	0.018469	-0.509644	0.840001	0.783739	0.991713	0.436765	0.840012	0.542638	0.876935	1.20253	0.840001	0.126757	0.664066
ENSGALG00000010402	HPGDS	chr4	36621105	36636068	-	protein_coding	Hematopoietic prostaglandin D synthase [Source:UniProtKB/Swiss-Prot;Acc:O73888]	-0.777381	1.20232	0.683889	0.912959	-1.53195	1.20231	0.35322	0.74269	-3.19165	1.20231	0.00597576	0.0522748	3.24811	1.2023	0.000210841	0.0203715	-2.34723	1.20229	0.153508	0.714942	-0.999032	1.20231	0.591422	0.895149	0.357007	1.2023	0.609674	0.971516
ENSGALG00000011203	HPSE	chr4	45858598	45863017	-	protein_coding	heparanase precursor [Source:RefSeq peptide;Acc:NP_989498]	0.903945	1.2734	0.320185	0.702236	1.46632	1.2734	0.12582	0.455462	-0.340929	1.2734	0.837466	0.939516	-5.51847	1.27339	0.000801671	0.0436928	-5.53051	1.27339	0.000659528	0.0716483	0.225169	1.2734	0.686461	0.930925	0.13354	1.27339	0.766202	0.987256
ENSGALG00000011604	SLC4A4	chr4	49571259	49794271	+	protein_coding	solute carrier family 4 (sodium bicarbonate cotransporter), member 4 [Source:HGNC Symbol;Acc:HGNC:11030]	-0.997274	2.18519	0.354045	0.73111	0.573421	2.18518	0.397264	0.772538	0.639586	2.18519	0.288102	0.608043	-4.09782	2.18518	0.000841715	0.0440141	0.31468	2.18518	0.601937	0.976175	0.493444	2.18518	0.460925	0.838638	-0.420994	2.18518	0.699806	0.979226
ENSGALG00000014202	GABRA4	chr4	66540864	66576459	+	protein_coding	gamma-aminobutyric acid (GABA) A receptor, alpha 4 [Source:HGNC Symbol;Acc:HGNC:4078]	-2.25178	-0.254304	0.0302025	0.194066	-2.24916	-0.254308	0.0296216	0.211534	-2.38875	-0.254305	0.00100782	0.0137792	4.83859	-0.25431	2.76587e-12	1.29203e-08	-2.24716	-0.254311	0.0331147	0.349449	-2.24069	-0.254307	0.0483419	0.309769	-2.28529	-0.254311	0.0123547	0.189913
ENSGALG00000026042	SHISA3	chr4	67854571	67856575	-	protein_coding	shisa family member 3 [Source:HGNC Symbol;Acc:HGNC:25159]	0.147413	0.774895	0.742233	0.930169	-4.58564	0.774882	0.0016739	0.0435446	-0.183182	0.774894	0.939382	0.981675	-4.77621	0.774874	0.000800813	0.0436928	-1.13849	0.774869	0.482358	0.954433	2.43035	0.774884	0.00591254	0.103774	0.0313702	0.77487	0.845556	0.992263
ENSGALG00000015559	ABLIM2	chr4	80230321	80370428	-	protein_coding	actin binding LIM protein family, member 2 [Source:HGNC Symbol;Acc:HGNC:19195]	1.63864	0.857275	0.0222005	0.158653	-0.996026	0.857291	0.380629	0.764439	0.785624	0.857277	0.209334	0.51794	-3.9152	0.8573	0.000816374	0.0436928	-3.89286	0.857306	0.000751084	0.0736731	-0.171765	0.857288	0.984006	1	0.017058	0.857305	0.866144	0.993537
ENSGALG00000016092	RAB11FIP5	chr4	89260772	89283484	+	protein_coding	RAB11 family interacting protein 5 (class I) [Source:HGNC Symbol;Acc:HGNC:24845]	1.88604	1.13515	0.00812151	0.0865833	0.00847632	1.13527	1	1	0.696444	1.13516	0.268758	0.590354	-4.48326	1.13533	0.000259723	0.0224677	-0.955061	1.13538	0.40546	0.928675	-1.32726	1.13525	0.25025	0.675381	-1.1394	1.13537	0.246046	0.839973
ENSGALG00000004827		chr5	642269	659083	+	protein_coding	Uncharacterized protein [Source:UniProtKB/TrEMBL;Acc:E1BY10]	1.67131	0.0928153	0.0696283	0.316398	-1.63131	0.092814	0.318295	0.71318	-3.44649	0.0928152	0.000382403	0.00661014	3.28098	0.0928133	0.000253847	0.0222338	-3.4257	0.0928128	0.00921436	0.1913	-3.41828	0.0928143	0.0158553	0.175335	-3.46912	0.0928129	0.00255865	0.0784441
ENSGALG00000005892	SCUBE2	chr5	8927057	8961764	+	protein_coding	signal peptide, CUB domain, EGF-like 2 [Source:HGNC Symbol;Acc:HGNC:30425]	1.03374	1.07483	0.258711	0.639431	-4.90862	1.07483	0.00179317	0.0451158	1.38999	1.07483	0.0940879	0.332128	-5.23979	1.07483	0.000879308	0.0446472	-5.25171	1.07483	0.000725986	0.0726712	0.158715	1.07483	0.726724	0.943516	0.354951	1.07483	0.616809	0.972215
ENSGALG00000006054	CALCA	chr5	9980460	9984994	+	protein_coding	calcitonin gene-related peptide isoform 3 preproprotein [Source:RefSeq peptide;Acc:NP_001258895]	-1.83134	3.27053	0.212421	0.58012	-2.56441	3.27053	0.0887453	0.378773	-2.59571	3.27053	0.015668	0.102555	-6.83752	3.27052	0.000128684	0.0145586	-5.95271	3.27052	0.000452713	0.0604221	3.83781	3.27053	1.13881e-06	0.000189992	0.662602	3.27052	0.397932	0.925809
ENSGALG00000028376	Fgf19	chr5	16862037	16868089	-	protein_coding	fibroblast growth factor 19 precursor [Source:RefSeq peptide;Acc:NP_990005]	-3.1179	4.42224	0.0393433	0.224403	-0.88354	4.42224	0.581205	0.870513	-1.40419	4.42224	0.173036	0.468129	3.71734	4.42224	3.19357e-06	0.000932388	-1.35679	4.42224	0.364199	0.915384	-0.360926	4.42224	0.908901	0.990693	-2.94926	4.42224	0.0292588	0.312525
ENSGALG00000007562	FGF4	chr5	16892092	16895043	-	protein_coding	fibroblast growth factor 4 [Source:HGNC Symbol;Acc:HGNC:3682]	-2.60238	-0.171394	0.0147069	0.123267	-2.59947	-0.171396	0.0146261	0.144104	-2.62596	-0.171394	0.00109514	0.0146395	3.33438	-0.171397	3.37797e-05	0.00570348	1.4386	-0.171398	0.0889541	0.576597	-2.59089	-0.171396	0.02525	0.221991	-2.63788	-0.171398	0.00515611	0.115748
ENSGALG00000027874	CHAC1	chr5	23730412	23732558	+	protein_coding	cation transport regulator-like protein 1 [Source:RefSeq peptide;Acc:NP_001186585]	0.42872	4.78526	0.512421	0.835743	-0.590978	4.78526	0.631466	0.891562	-2.18844	4.78526	0.0084065	0.066468	2.47224	4.78526	0.000419013	0.0299984	-1.27939	4.78526	0.252809	0.85485	-0.521813	4.78526	0.69372	0.932655	-0.465595	4.78526	0.675246	0.976745
ENSGALG00000009920	Protein	chr5	33517885	33534657	+	protein_coding	Cochlin [Source:UniProtKB/Swiss-Prot;Acc:O42163]	2.28752	1.55666	0.0205654	0.150892	-1.6725	1.55665	0.383052	0.765305	-3.09718	1.55666	0.0185831	0.116312	-5.89614	1.55665	0.00100636	0.0477159	-5.69073	1.55665	0.00205982	0.106126	-4.17201	1.55665	0.038393	0.276627	2.41094	1.55665	0.0106763	0.175322
ENSGALG00000002479	MAT1A	chr6	3915004	3932026	+	protein_coding	S-adenosylmethionine synthase isoform type-1 [Source:RefSeq peptide;Acc:NP_001186448]	-1.21939	1.24881	0.550007	0.854792	-2.01951	1.2488	0.28829	0.687526	-4.17746	1.24881	0.00212217	0.0242974	3.64406	1.2488	0.000149016	0.0159412	-5.49565	1.24879	0.00155561	0.0986443	1.31999	1.24881	0.188903	0.605649	-5.08626	1.24879	0.00223717	0.0722388
ENSGALG00000003437	ADAM8	chr6	8867266	8879479	-	protein_coding	ADAM metallopeptidase domain 8 [Source:HGNC Symbol;Acc:HGNC:215]	-1.67081	2.24011	0.256077	0.63662	-0.752398	2.24011	0.659441	0.904113	1.52041	2.24011	0.045818	0.215975	-6.73082	2.24011	2.06895e-05	0.0040837	-0.215152	2.24012	1	1	-0.407244	2.24011	0.885226	0.985289	0.58891	2.24012	0.445332	0.941735
ENSGALG00000004167	SRGN	chr6	10403302	10408400	+	protein_coding	serglycin [Source:HGNC Symbol;Acc:HGNC:9361]	-0.490282	-0.0185604	0.587858	0.875384	1.71176	-0.0185518	0.00322374	0.0614078	-0.0272087	-0.0185596	1	1	-2.84952	-0.0185471	0.000409505	0.0298074	-0.663311	-0.0185439	0.411481	0.930652	-0.385794	-0.0185534	0.691006	0.931773	0.126975	-0.0185444	0.728081	0.981811
ENSGALG00000005547	PIK3AP1	chr6	16273210	16314303	-	protein_coding	Phosphoinositide 3-kinase adapter protein 1 [Source:UniProtKB/Swiss-Prot;Acc:Q9DDT2]	2.61217	2.4783	0.00698342	0.079501	0.863565	2.47837	0.352989	0.742578	-1.6797	2.47831	0.183772	0.483654	-7.02068	2.47841	0.000235399	0.0214213	0.0458592	2.47843	0.796492	0.991713	-3.37448	2.47836	0.0859371	0.4147	-0.856508	2.47843	0.636135	0.974019
ENSGALG00000005985	GDF10	chr6	17563818	17576143	-	protein_coding	growth differentiation factor 10 [Source:HGNC Symbol;Acc:HGNC:4215]	-6.19857	1.7817	0.000482707	0.0137214	-6.19443	1.7817	0.000474883	0.0196894	3.08672	1.7817	0.000323823	0.0058707	-6.18193	1.7817	0.000669225	0.0392406	-6.19425	1.7817	0.000550024	0.0654638	0.431506	1.7817	0.571365	0.88692	-0.378534	1.7817	0.916131	0.997671
ENSGALG00000020753		chr6	21669881	21670765	+	protein_coding	Uncharacterized protein [Source:UniProtKB/TrEMBL;Acc:F1P347]	1.24563	0.693362	0.145621	0.479973	2.51619	0.693344	0.00253716	0.0547252	-0.851022	0.693361	0.415775	0.716102	-4.63965	0.693334	0.000556576	0.0347633	-0.976258	0.693327	0.531696	0.967773	-4.64296	0.693347	0.000876517	0.0335186	-1.27413	0.693328	0.326163	0.890428
ENSGALG00000009302	EMX2	chr6	28814903	28820582	+	protein_coding	empty spiracles homeobox 2 [Source:HGNC Symbol;Acc:HGNC:3341]	-0.51662	-0.407292	0.681069	0.912452	0.742287	-0.407299	0.274141	0.670124	-1.45216	-0.407293	0.00595272	0.0521384	2.53654	-0.407303	0.000141762	0.0155068	-1.34198	-0.407305	0.090653	0.579303	-1.33638	-0.407298	0.116882	0.482328	-1.37157	-0.407305	0.0425043	0.389572
ENSGALG00000009588		chr6	30871727	30910708	+	protein_coding	Uncharacterized protein [Source:UniProtKB/TrEMBL;Acc:E1C1A5]	-2.90047	-0.0866735	0.0161264	0.131393	-2.89735	-0.0866821	0.0157897	0.151042	-3.04989	-0.0866744	0.00033319	0.005994	4.80237	-0.0866868	7.29942e-09	7.30672e-06	-2.89587	-0.08669	0.0176302	0.257633	-0.378867	-0.0866805	0.95714	1	-2.9374	-0.0866895	0.00571376	0.123569
ENSGALG00000010500	Nkx-6.2	chr6	34788047	34790162	-	protein_coding	homeobox protein Nkx-6.2 [Source:RefSeq peptide;Acc:NP_001186477]	-0.274714	2.15035	1	1	-1.92097	2.15034	0.34794	0.737718	-6.0368	2.15035	5.02391e-05	0.0014646	4.50207	2.15034	2.61707e-06	0.000814394	-2.56926	2.15034	0.202804	0.795571	-6.62655	2.15035	0.00160526	0.0492764	-1.2212	2.15034	0.50775	0.955982
ENSGALG00000003836	RBM44	chr7	4603819	4605946	-	protein_coding	RNA binding motif protein 44 [Source:HGNC Symbol;Acc:HGNC:24756]	-2.79182	-0.117582	0.0133348	0.116287	-2.78891	-0.117597	0.0131911	0.13554	-0.529187	-0.117583	0.653655	0.857144	4.28164	-0.117605	5.121e-08	4.22151e-05	-2.78714	-0.11761	0.014808	0.241956	-2.77986	-0.117594	0.0233771	0.214262	-2.82819	-0.11761	0.00455925	0.109035
ENSGALG00000004196		chr7	5735050	5897491	-	protein_coding	Uncharacterized protein [Source:UniProtKB/TrEMBL;Acc:F1P1M1]	-0.249398	-0.00659228	0.862779	0.967279	-0.172453	-0.00660183	0.973563	1	-0.960312	-0.00659321	0.157738	0.446663	2.2254	-0.00660716	0.00039439	0.0293988	-0.167817	-0.00661064	1	1	-2.04889	-0.00660009	0.0300695	0.241902	-0.516242	-0.00661013	0.571171	0.965682
ENSGALG00000007503	KMO	chr7	7162357	7173440	+	protein_coding	kynurenine 3-monooxygenase (kynurenine 3-hydroxylase) [Source:HGNC Symbol;Acc:HGNC:6381]	-2.11845	-0.280736	0.0348258	0.21029	-2.11623	-0.280749	0.0345755	0.228987	-0.0360173	-0.280737	1	1	3.52275	-0.280757	5.45515e-06	0.00141571	-2.11386	-0.280762	0.0381533	0.374352	-2.10705	-0.280747	0.0546028	0.328273	-2.15096	-0.280761	0.014705	0.210066
ENSGALG00000009089	titin	chr7	14648300	14691849	+	protein_coding	Uncharacterized protein [Source:UniProtKB/TrEMBL;Acc:F1NGF6]	6.02834	3.58352	2.94682e-11	9.60389e-09	-3.21083	3.58355	0.125637	0.455072	-3.19386	3.58353	0.0271534	0.151786	-7.96969	3.58356	0.000540943	0.0344581	-8.2264	3.58357	0.000170463	0.037326	-1.50563	3.58354	0.505167	0.859215	-8.1011	3.58357	4.73548e-05	0.0154049
ENSGALG00000010873	DHRS9	chr7	18356767	18360929	-	protein_coding	dehydrogenase/reductase (SDR family) member 9 [Source:HGNC Symbol;Acc:HGNC:16888]	1.67977	0.436131	0.0278626	0.184174	-1.51827	0.436117	0.213105	0.597709	0.173784	0.43613	0.74362	0.899883	-4.17768	0.436109	0.000218418	0.020406	-1.66722	0.436104	0.174792	0.753616	0.639751	0.43612	0.390635	0.795905	0.0124149	0.436105	0.880491	0.994798
ENSGALG00000011089	IFIH1	chr7	20543411	20570333	+	protein_coding	interferon-induced helicase C domain-containing protein 1 [Source:RefSeq peptide;Acc:NP_001180567]	1.94293	1.48655	0.0369224	0.216996	0.553507	1.48657	0.494286	0.829559	-1.61418	1.48655	0.163632	0.455983	-5.57309	1.48657	0.00107731	0.0496628	-0.432727	1.48658	0.908235	1	1.30108	1.48656	0.167462	0.572493	-2.87011	1.48658	0.0538908	0.442949
ENSGALG00000011358	Wnt6	chr7	21900552	21908596	-	protein_coding	Gallus gallus wingless-type MMTV integration site family, member 6 (WNT6), mRNA. [Source:RefSeq mRNA;Acc:NM_001007594]	-1.01913	0.733783	0.504381	0.832431	-3.15927	0.733773	0.0286906	0.208651	2.63816	0.733782	0.000278847	0.00522359	-4.70993	0.733767	0.000494768	0.0326098	-0.858238	0.733763	0.592639	0.974169	-0.778047	0.733775	0.663832	0.920901	-0.445467	0.733764	0.796423	0.988382
ENSGALG00000011671	SLC15A2	chr7	25892439	25928915	+	protein_coding	solute carrier family 15 (oligopeptide transporter), member 2 [Source:HGNC Symbol;Acc:HGNC:10921]	-0.95553	1.3364	0.635177	0.895177	0.979706	1.3364	0.294408	0.694489	0.803995	1.3364	0.33599	0.65159	-5.60622	1.3364	0.000873376	0.0445073	-0.502629	1.3364	0.878506	0.997725	-0.21166	1.3364	1	1	0.15493	1.3364	0.750465	0.984456
ENSGALG00000011806	MUC13	chr7	27422611	27442038	-	protein_coding	mucin 13, cell surface associated [Source:HGNC Symbol;Acc:HGNC:7511]	-5.84155	1.66996	0.0015752	0.031268	-1.63383	1.66995	0.396004	0.772097	0.620673	1.66996	0.455941	0.746963	-6.03708	1.66994	0.000855163	0.0441766	-4.57997	1.66993	0.017204	0.25567	2.21929	1.66995	0.0271001	0.23055	0.828331	1.66993	0.359969	0.9081
ENSGALG00000012106	SCTR	chr7	27855541	27870773	+	protein_coding	secretin receptor precursor [Source:RefSeq peptide;Acc:NP_001165013]	3.57993	1.9526	9.80998e-05	0.00428278	-0.112976	1.9526	1	1	-0.686406	1.9526	0.612767	0.838667	-6.3888	1.9526	0.000446293	0.0306696	-1.81945	1.9526	0.325837	0.900001	-6.39283	1.9526	0.000803396	0.0319852	-1.85267	1.9526	0.24592	0.839847
ENSGALG00000012117	STEAP3	chr7	27906368	27920392	-	protein_coding	STEAP family member 3, metalloreductase [Source:HGNC Symbol;Acc:HGNC:24592]	0.0607165	1.32611	0.782397	0.943134	-5.63567	1.3262	0.00142577	0.0402837	-2.44386	1.32612	0.0666412	0.272218	4.5597	1.32626	1.16285e-06	0.000428847	-1.49344	1.32629	0.483581	0.955219	-5.62764	1.32619	0.00346566	0.0766053	-5.6822	1.32629	0.000298652	0.0357718
ENSGALG00000028457	MAP3K19	chr7	29990466	29999593	-	protein_coding	mitogen-activated protein kinase kinase kinase 19 [Source:HGNC Symbol;Acc:HGNC:26249]	-1.19139	1.185	0.482149	0.820269	-0.0685568	1.18499	1	1	-2.22547	1.185	0.0533897	0.237676	-5.39392	1.18498	0.000517123	0.0337068	0.375879	1.18498	0.596964	0.975222	1.13796	1.18499	0.215405	0.637662	1.66194	1.18498	0.0591126	0.466182
ENSGALG00000012538	NR4A2	chr7	35531192	35536596	-	protein_coding	nuclear receptor subfamily 4, group A, member 2 [Source:HGNC Symbol;Acc:HGNC:7981]	-1.34413	0.703551	0.323946	0.705483	-3.51438	0.703535	0.00961444	0.112684	1.61614	0.70355	0.0241189	0.140658	-4.6577	0.703525	0.000273748	0.0233921	1.73151	0.703519	0.0363038	0.366508	-1.29762	0.703538	0.362537	0.774717	-1.10653	0.70352	0.365651	0.909532
ENSGALG00000003424	LMX1A	chr8	5141844	5166718	+	protein_coding	LIM homeobox transcription factor 1-alpha [Source:RefSeq peptide;Acc:NP_001244317]	-4.57578	4.37769	6.39744e-06	0.000484615	-2.03943	4.3777	0.0239378	0.190497	1.11865	4.37769	0.0313227	0.166904	-8.62409	4.3777	6.77365e-13	4.7463e-09	-1.65949	4.3777	0.0618918	0.481034	1.70427	4.37769	0.00499027	0.0942503	0.616576	4.3777	0.28278	0.86677
ENSGALG00000026263	RGS8	chr8	5564250	5580305	+	protein_coding	regulator of G-protein signaling 8 [Source:HGNC Symbol;Acc:HGNC:16810]	-5.17083	1.13577	0.00265207	0.0437249	-4.95296	1.13585	0.00471629	0.074263	-5.26226	1.13578	1.84137e-05	0.000677295	4.5342	1.1359	3.20756e-07	0.000179803	-0.579518	1.13593	0.839999	0.992896	-3.5399	1.13584	0.0611613	0.347937	-0.313214	1.13593	0.949732	1
ENSGALG00000020976		chr8	6256740	6267823	-	protein_coding	Uncharacterized protein [Source:UniProtKB/TrEMBL;Acc:E1C215]	-1.91464	-0.206086	0.100942	0.393472	-2.46163	-0.206088	0.0118253	0.128044	-0.4664	-0.206086	0.657244	0.858923	2.60963	-0.206089	0.00081998	0.0436928	0.464203	-0.20609	0.511801	0.963164	-2.45292	-0.206088	0.0201033	0.197704	-0.396793	-0.20609	0.824123	0.990674
ENSGALG00000004472	ASTN1	chr8	6711187	6754418	+	protein_coding	astrotactin 1 [Source:HGNC Symbol;Acc:HGNC:773]	-2.7919	2.23173	0.00197666	0.0357431	-0.462308	2.23173	0.623786	0.888037	1.31132	2.23173	0.00948841	0.072503	-3.39732	2.23173	0.000450831	0.0306696	-0.644401	2.23173	0.465474	0.948792	0.992621	2.23173	0.105516	0.460226	-0.0239636	2.23173	1	1
ENSGALG00000005073	PDC	chr8	9879705	9912133	+	protein_coding	phosducin [Source:HGNC Symbol;Acc:HGNC:8759]	-1.95974	-0.312126	0.0338906	0.207217	1.33602	-0.312134	0.0842167	0.369278	-2.08861	-0.312126	0.00119398	0.0155651	2.80114	-0.312138	0.000213687	0.0203715	-1.95508	-0.312141	0.0375097	0.371933	-1.60745	-0.312132	0.204814	0.62465	-1.3793	-0.31214	0.131803	0.676096
ENSGALG00000005257	VCAM1	chr8	10818883	10826594	+	protein_coding	vascular cell adhesion molecule 1 [Source:HGNC Symbol;Acc:HGNC:12663]	0.269774	0.960098	0.662818	0.904964	-1.04827	0.960132	0.654293	0.902191	-5.2657	0.960101	2.05262e-05	0.000735689	4.54299	0.960151	2.08514e-06	0.000695743	-5.09437	0.960163	0.00370427	0.136832	-3.95255	0.960126	0.060689	0.34646	-5.1406	0.960162	0.000841932	0.0494442
ENSGALG00000006019	EPHX4	chr8	13219594	13236081	-	protein_coding	epoxide hydrolase 4 [Source:HGNC Symbol;Acc:HGNC:23758]	-1.8981	0.728897	0.21364	0.581404	-0.626197	0.728908	0.75664	0.942706	0.614188	0.728898	0.414483	0.715076	-4.70936	0.728914	0.000889986	0.0448053	0.69296	0.728917	0.405922	0.928675	1.05888	0.728906	0.234126	0.658454	-0.0342945	0.728917	1	1
ENSGALG00000008709	MCOLN3	chr8	15314683	15329774	+	protein_coding	mucolipin 3 [Source:HGNC Symbol;Acc:HGNC:13358]	-3.95397	0.319753	0.00692827	0.0791302	-3.9503	0.319737	0.00669129	0.0891366	-0.768811	0.319751	0.553052	0.805464	4.4306	0.319728	9.01493e-07	0.000360958	-3.94952	0.319723	0.00751832	0.173578	-3.94165	0.31974	0.0136718	0.162784	-1.21416	0.319723	0.453156	0.943398
ENSGALG00000009957	TIE1	chr8	18560220	18571250	+	protein_coding	tyrosine kinase with immunoglobulin-like and EGF-like domains 1 [Source:HGNC Symbol;Acc:HGNC:11809]	-2.28646	1.35615	0.196655	0.558095	3.27767	1.35615	0.000395574	0.0174876	-0.384503	1.35615	0.812068	0.929988	-5.63424	1.35615	0.000914188	0.0452052	-0.424448	1.35615	0.925467	1	-0.281647	1.35615	1	1	-5.69298	1.35615	0.000113686	0.02276
ENSGALG00000010203		chr8	19816839	19823208	-	protein_coding		-1.40446	1.667	0.0657152	0.304796	2.0369	1.667	0.00010598	0.00684427	0.350833	1.667	0.447595	0.740039	-2.95734	1.667	0.000547457	0.0347152	-0.571008	1.667	0.466204	0.948792	-3.83992	1.667	1.38568e-05	0.00165973	0.356413	1.667	0.479508	0.951018
ENSGALG00000010417		chr8	20517455	20527586	-	protein_coding	vitamin D3 hydroxylase-associated protein [Source:RefSeq peptide;Acc:NP_990307]	-0.10513	1.27325	1	1	0.416452	1.27325	0.574635	0.86761	-1.64538	1.27325	0.161294	0.451985	-5.51966	1.27324	0.000585067	0.0358041	-0.0969318	1.27324	1	1	0.0760751	1.27325	0.778109	0.959731	1.77186	1.27324	0.0482979	0.419491
ENSGALG00000006361	NEU4	chr9	4252764	4254591	-	protein_coding	sialidase 4 [Source:HGNC Symbol;Acc:HGNC:21328]	-1.606	2.25298	0.136155	0.462861	-1.40251	2.25298	0.197261	0.573373	0.499879	2.25298	0.403643	0.707165	-6.74581	2.25299	5.64258e-08	4.39306e-05	-0.216162	2.25299	0.928623	1	-0.160997	2.25298	0.983578	1	1.8029	2.25299	0.00631375	0.130696
ENSGALG00000005275		chr9	6274495	6286125	+	protein_coding	Uncharacterized protein [Source:UniProtKB/TrEMBL;Acc:E1C1Y7]	-1.67409	-0.361893	0.0445861	0.241713	-1.67161	-0.361885	0.0449589	0.265763	-1.25526	-0.361892	0.0964113	0.336999	3.16598	-0.36188	7.57383e-06	0.00179667	-1.25243	-0.361877	0.225925	0.827143	-0.25193	-0.361886	1	1	-0.852932	-0.361877	0.460298	0.943891
ENSGALG00000005246	PAX3	chr9	7357518	7422566	-	protein_coding	paired box 3 [Source:HGNC Symbol;Acc:HGNC:8617]	-2.64201	5.43356	0.000616054	0.0164759	-1.07572	5.43356	0.137969	0.479758	2.28573	5.43356	4.94611e-08	4.41495e-06	-3.44273	5.43356	4.49333e-05	0.00684451	-1.10478	5.43356	0.127814	0.668351	-0.798398	5.43356	0.282791	0.707889	0.237885	5.43356	0.604959	0.971516
ENSGALG00000006811	ZIC1	chr9	11395947	11400537	+	protein_coding	zinc finger protein ZIC 1 [Source:RefSeq peptide;Acc:NP_989585]	-5.76021	2.19817	0.000481193	0.0137062	-4.34552	2.19816	0.00836687	0.102764	3.20565	2.19817	1.5269e-05	0.000593614	-6.45722	2.19816	0.000119521	0.013958	-3.346	2.19815	0.0360304	0.365908	-1.70203	2.19816	0.286462	0.711662	0.496854	2.19815	0.511212	0.956229
ENSGALG00000006995	ApoD	chr9	12153804	12156739	+	protein_coding	apolipoprotein D precursor [Source:RefSeq peptide;Acc:NP_001011692]	-1.0323	0.965008	0.554998	0.858561	-2.63275	0.964992	0.108583	0.423393	1.48095	0.965006	0.0687018	0.276425	-5.07269	0.964983	0.000835958	0.0440141	-0.958381	0.964977	0.601876	0.976175	-3.03953	0.964995	0.0734216	0.382873	1.69448	0.964978	0.0546448	0.447309
ENSGALG00000008909	USP13	chr9	16861502	16902461	-	protein_coding	ubiquitin specific peptidase 13 (isopeptidase T-3) [Source:HGNC Symbol;Acc:HGNC:12611]	-3.06199	1.17043	0.0755487	0.332509	-0.271723	1.17043	1	1	-2.55095	1.17043	0.0348004	0.179127	-5.37738	1.17043	0.000906345	0.0452011	0.163141	1.17043	0.729025	0.989366	1.76352	1.17043	0.0675113	0.367297	1.67709	1.17043	0.0660456	0.494161
ENSGALG00000026131		chr9	21454736	21462285	-	protein_coding	Uncharacterized protein [Source:UniProtKB/TrEMBL;Acc:R4GKJ3]	1.00201	0.683513	0.246109	0.623	-3.50619	0.683508	0.019186	0.168996	0.918521	0.683512	0.23255	0.54699	-4.62855	0.683506	0.000818684	0.0436928	0.40631	0.683504	0.571124	0.970424	-0.483789	0.683509	0.854174	0.974214	-0.0634415	0.683504	1	1
ENSGALG00000009537	PPM1L	chr9	21476302	21557159	+	protein_coding	protein phosphatase, Mg2+/Mn2+ dependent, 1L [Source:HGNC Symbol;Acc:HGNC:16381]	-0.0914041	2.17961	1	1	0.120886	2.17962	0.773466	0.94936	0.934549	2.17961	0.114416	0.373673	-5.08548	2.17962	3.01185e-05	0.00527601	0.420566	2.17962	0.507646	0.961237	-0.39875	2.17962	0.761878	0.953919	-0.36083	2.17962	0.746506	0.984456
ENSGALG00000025885	COR7A	chr10	276437	277408	+	protein_coding	chick olfactory receptor 7a [Source:RefSeq peptide;Acc:NP_001025563]	0.695479	0.060362	0.389602	0.759794	-0.390098	0.0603589	0.921912	0.990468	-2.39715	0.0603617	0.0190031	0.118149	3.53481	0.0603572	2.05756e-05	0.0040837	-3.3386	0.0603561	0.00631681	0.161743	-3.33123	0.0603595	0.0107514	0.142854	-3.38179	0.0603562	0.00157949	0.0624228
ENSGALG00000001412	SEMA7A	chr10	2032641	2055582	+	protein_coding	semaphorin 7A, GPI membrane anchor (John Milton Hagen blood group) precursor [Source:RefSeq peptide;Acc:NP_001186678]	-3.27851	2.71228	0.00566341	0.0696545	0.324126	2.71227	0.598181	0.878281	1.29897	2.71227	0.0373093	0.187874	-4.24163	2.71227	0.0010217	0.0478866	-1.22379	2.71227	0.276788	0.874624	0.863152	2.71227	0.237228	0.659776	-0.0624287	2.71227	0.957483	1
ENSGALG00000008164	ADAMTS7	chr10	19166391	19211028	+	protein_coding	ADAM metallopeptidase with thrombospondin type 1 motif, 7 [Source:HGNC Symbol;Acc:HGNC:223]	0.413875	1.50068	0.568069	0.863809	1.59077	1.50068	0.0736647	0.346053	0.242909	1.50068	0.699225	0.878671	-5.82381	1.50068	0.000128819	0.0145586	-1.25676	1.50067	0.427983	0.937595	-0.307825	1.50068	0.962478	1	-0.463126	1.50067	0.797173	0.988382
ENSGALG00000000780	SMPD3	chr11	143380	253087	+	protein_coding	sphingomyelin phosphodiesterase 3, neutral membrane (neutral sphingomyelinase II) [Source:HGNC Symbol;Acc:HGNC:14240]	-3.15062	6.95219	2.99141e-08	5.44437e-06	-0.324941	6.95219	0.5354	0.848891	1.78911	6.95219	1.26226e-08	1.35032e-06	-2.74796	6.95219	2.24508e-06	0.000731686	0.0789872	6.95219	0.799737	0.991713	-0.963049	6.95219	0.0643761	0.358003	0.0667924	6.95219	0.819767	0.990278
ENSGALG00000004630		chr11	9290336	9335423	-	protein_coding	Uncharacterized protein [Source:UniProtKB/TrEMBL;Acc:F1NJK1]	2.92629	0.917601	0.000559296	0.015249	-1.4578	0.91758	0.359811	0.748696	-1.54543	0.917599	0.155182	0.443277	-4.99883	0.917568	0.000588167	0.0358372	-2.34471	0.91756	0.128235	0.668558	-3.01302	0.917584	0.0669051	0.365967	1.10244	0.917561	0.194636	0.778984
ENSGALG00000004729	SLC7A10	chr11	9573440	9605701	-	protein_coding	solute carrier family 7 (neutral amino acid transporter light chain, asc system), member 10 [Source:HGNC Symbol;Acc:HGNC:11058]	-2.84897	0.0956148	0.0366812	0.21626	1.65386	0.0956029	0.060253	0.310686	-3.33216	0.0956136	0.000365458	0.00638594	3.28431	0.0955962	9.12262e-05	0.0114147	-2.76847	0.0955919	0.0396529	0.380649	-3.15182	0.0956051	0.0221446	0.208487	-2.27976	0.0955925	0.0706418	0.510344
ENSGALG00000025938	KIAA0513	chr11	17220898	17233182	-	protein_coding	KIAA0513 [Source:HGNC Symbol;Acc:HGNC:29058]	-0.298645	1.29358	0.909638	0.986388	0.407293	1.29357	0.553114	0.858864	1.28697	1.29358	0.0647491	0.267585	-5.54474	1.29356	2.56381e-05	0.00472754	0.298544	1.29355	0.636348	0.980375	-0.539177	1.29357	0.748941	0.949717	-1.14769	1.29355	0.327479	0.890779
ENSGALG00000000893	TAT	chr11	19280394	19289813	+	protein_coding	tyrosine aminotransferase [Source:HGNC Symbol;Acc:HGNC:11573]	-3.82993	0.26413	0.00503713	0.0649017	-3.82638	0.264106	0.00493419	0.0757368	-3.98973	0.264128	3.91003e-05	0.00122584	3.84109	0.264093	1.21367e-05	0.00265756	-1.12414	0.264084	0.529505	0.966763	-3.59991	0.264111	0.0226168	0.21102	0.709754	0.264086	0.393089	0.922157
ENSGALG00000026199		chr12	9896938	9898062	-	protein_coding	Uncharacterized protein [Source:UniProtKB/TrEMBL;Acc:R4GIY5]	-0.961999	-0.288261	0.367892	0.744388	-2.0908	-0.288247	0.00861637	0.104455	1.05138	-0.28826	0.0717854	0.28378	2.34576	-0.288239	0.000427033	0.0300726	-1.54831	-0.288234	0.069568	0.510967	-2.08314	-0.28825	0.0138186	0.163974	-2.12593	-0.288235	0.00259587	0.0785331
ENSGALG00000021862		chr12	10319488	10338464	-	protein_coding	Uncharacterized protein [Source:UniProtKB/TrEMBL;Acc:E1BTP1]	-2.88559	-0.0898055	0.00764104	0.0835921	-2.88269	-0.0898238	0.00764559	0.0967202	0.0428724	-0.0898072	0.882216	0.957579	3.13775	-0.089834	8.10361e-05	0.0107136	-2.88079	-0.0898407	0.00868573	0.187553	0.280875	-0.0898204	0.646949	0.914961	-2.92229	-0.0898397	0.0023247	0.0745499
ENSGALG00000007483	LRIG1	chr12	14432245	14482570	-	protein_coding	leucine-rich repeats and immunoglobulin-like domains 1 [Source:HGNC Symbol;Acc:HGNC:17360]	-2.11655	4.60502	0.00522754	0.0661181	0.870635	4.60502	0.107124	0.420444	1.95952	4.60502	5.38344e-06	0.000253166	-3.2224	4.60502	0.000128107	0.0145586	-1.21477	4.60502	0.0992209	0.606139	-1.88681	4.60502	0.0146753	0.169496	-0.444374	4.60502	0.511497	0.956229
ENSGALG00000007573	STK32A	chr13	17432186	17454165	+	protein_coding	serine/threonine-protein kinase 32A [Source:RefSeq peptide;Acc:NP_001020782]	-1.00802	2.09822	0.560523	0.860961	-4.02985	2.0982	0.0179161	0.161672	1.3466	2.09822	0.0954797	0.334848	-6.55979	2.0982	8.79019e-05	0.0111987	-0.148453	2.09819	1	1	-1.50109	2.09821	0.379071	0.787561	1.4569	2.09819	0.0962895	0.597736
ENSGALG00000003642	PDGF-A	chr14	1990041	2011428	-	protein_coding	platelet-derived growth factor subunit A preproprotein [Source:RefSeq peptide;Acc:NP_989637]	-1.12908	3.35624	0.288863	0.672335	-0.271637	3.35624	0.87386	0.977128	-0.584425	3.35624	0.459041	0.749242	2.33554	3.35623	0.000647214	0.0384324	-0.905177	3.35623	0.409438	0.929811	0.180241	3.35624	0.717372	0.939551	-1.58915	3.35623	0.0970977	0.599439
ENSGALG00000004632		chr14	4256780	4257997	+	protein_coding	Uncharacterized protein [Source:UniProtKB/TrEMBL;Acc:F1NJJ7]	-0.472328	1.1012	0.793211	0.945501	1.41113	1.1012	0.0856757	0.371491	0.0819234	1.1012	0.833055	0.937703	-5.27875	1.1012	6.26958e-05	0.00887493	1.2606	1.1012	0.125197	0.665227	-0.571101	1.1012	0.74391	0.948766	-1.96996	1.1012	0.102248	0.61157
ENSGALG00000002442	ANKS4B	chr14	15068803	15074719	+	protein_coding	ankyrin repeat and sterile alpha motif domain containing 4B [Source:HGNC Symbol;Acc:HGNC:26795]	-2.22804	-0.258176	0.0307712	0.196064	-2.22564	-0.258188	0.0304899	0.214717	0.99403	-0.258177	0.164627	0.456668	2.7387	-0.258195	0.000980029	0.0471963	-2.22343	-0.258199	0.0337285	0.353003	-2.2166	-0.258186	0.0490887	0.311876	-2.26132	-0.258198	0.0126387	0.191924
ENSGALG00000004760	TMEM116	chr15	6241909	6254260	-	protein_coding	transmembrane protein 116 [Source:HGNC Symbol;Acc:HGNC:25084]	-0.850086	1.48651	0.599708	0.882198	-0.431964	1.48651	0.858348	0.973764	-0.303799	1.48651	0.82135	0.932795	-5.38961	1.48651	0.000625007	0.037431	0.953172	1.4865	0.263331	0.86283	0.928642	1.48651	0.278769	0.703647	0.524956	1.4865	0.487306	0.951957
ENSGALG00000005577	SEZ6L	chr15	7123775	7135058	+	protein_coding	seizure related 6 homolog (mouse)-like [Source:HGNC Symbol;Acc:HGNC:10763]	-5.43127	1.20177	0.000348044	0.0106496	-5.24157	1.20175	0.00102091	0.0334192	1.82389	1.20177	0.024283	0.141321	-5.41496	1.20173	0.000516659	0.0337068	-5.03441	1.20173	0.00214189	0.107201	0.995651	1.20175	0.271528	0.698455	0.955369	1.20173	0.268793	0.859557
ENSGALG00000007781	GAL3ST1	chr15	10794681	10798850	+	protein_coding	galactose-3-O-sulfotransferase 1 [Source:HGNC Symbol;Acc:HGNC:24240]	-3.65501	3.0463	0.000138544	0.00551577	-2.28549	3.0463	0.0118179	0.128044	2.16794	3.0463	1.06386e-05	0.000441093	-7.63208	3.0463	3.87444e-12	1.35741e-08	-0.51489	3.0463	0.580111	0.971291	-0.0382321	3.0463	0.938217	0.997524	0.284849	3.0463	0.586774	0.969129
ENSGALG00000008952	noxa1	chr17	902674	915909	+	protein_coding	Uncharacterized protein [Source:UniProtKB/TrEMBL;Acc:E1BWX5]	0.745506	1.48884	0.387176	0.757805	0.334034	1.48883	0.624487	0.888761	0.0131825	1.48884	0.894965	0.963213	-5.80633	1.48882	0.000328315	0.0265637	0.260035	1.48882	0.670174	0.981678	0.580305	1.48883	0.479383	0.847599	-0.714325	1.48882	0.672124	0.976745
ENSGALG00000023909		chr17	1883863	1894238	-	protein_coding		0.374369	0.138134	0.585308	0.874025	-2.62979	0.138125	0.0572024	0.301934	-3.69988	0.138133	1.81125e-05	0.000671504	2.93017	0.138121	0.000531934	0.0341951	-3.53777	0.138117	0.00394785	0.139008	1.36219	0.138127	0.123469	0.495501	-3.58153	0.138118	0.000875462	0.0506972
ENSGALG00000003852	LAMC3	chr17	6063756	6078732	+	protein_coding	laminin, gamma 3 [Source:HGNC Symbol;Acc:HGNC:6494]	4.06185	1.19071	1.85254e-06	0.000174239	-1.64241	1.19091	0.339771	0.731012	-1.00758	1.19073	0.396442	0.70166	-5.47186	1.19103	0.000665346	0.0392406	-1.05198	1.1911	0.571205	0.970424	-3.3137	1.19087	0.0610645	0.347664	-2.20547	1.19109	0.135003	0.682877
ENSGALG00000023626	NTN1	chr18	2020996	2066954	+	protein_coding	Netrin-1 [Source:UniProtKB/Swiss-Prot;Acc:Q90922]	-2.72835	-0.136287	0.0116664	0.107963	-2.72547	-0.136297	0.0116157	0.126955	-2.8749	-0.136288	0.00017346	0.00372833	3.46536	-0.136303	1.28373e-05	0.0026851	-2.7236	-0.136307	0.0130895	0.229829	-1.14015	-0.136295	0.433612	0.82289	0.786282	-0.136306	0.314631	0.887036
ENSGALG00000003114	NOG	chr18	6162700	6163371	+	protein_coding	noggin precursor [Source:RefSeq peptide;Acc:NP_989454]	-1.88389	3.05282	0.0348283	0.21029	-0.944551	3.05282	0.287487	0.686929	1.93015	3.05282	0.000130388	0.00303786	-3.65204	3.05282	0.000331715	0.0265637	0.291811	3.05282	0.593619	0.974169	-5.57577	3.05282	3.30564e-07	7.23832e-05	0.470094	3.05282	0.405573	0.929806
ENSGALG00000001028	RNF43	chr19	516190	561565	-	protein_coding	ring finger protein 43 [Source:HGNC Symbol;Acc:HGNC:18505]	-1.87699	-0.327727	0.0369609	0.216996	-0.192857	-0.327728	1	1	-1.36767	-0.327727	0.0677044	0.274437	2.58071	-0.327728	0.000739317	0.0417774	-0.807462	-0.327729	0.553882	0.968556	-1.86657	-0.327728	0.0562831	0.334926	0.351435	-0.327729	0.570626	0.965682
ENSGALG00000003952	RBPJL	chr20	5492224	5505650	-	protein_coding	recombination signal binding protein for immunoglobulin kappa J region-like [Source:HGNC Symbol;Acc:HGNC:13761]	-2.81731	1.87927	0.00706339	0.0797654	-1.64222	1.87926	0.105737	0.418166	2.44541	1.87927	7.63865e-06	0.000336629	-4.11264	1.87926	0.000389214	0.0293128	0.0399432	1.87926	0.847952	0.994284	-1.04359	1.87927	0.319282	0.741535	-0.389152	1.87926	0.704974	0.979226
ENSGALG00000005628	COL9A3	chr20	8689083	8720874	+	protein_coding	collagen alpha-3(IX) chain precursor [Source:RefSeq peptide;Acc:NP_990636]	-2.36121	6.4715	3.65762e-06	0.000300152	-1.01338	6.4715	0.0338877	0.227117	0.924731	6.4715	0.00307502	0.031663	-2.12208	6.4715	5.2761e-05	0.00786588	1.05075	6.4715	0.00523678	0.154501	0.101346	6.4715	0.755196	0.951611	0.0659782	6.4715	0.81668	0.989107
ENSGALG00000006930	SLC12A5	chr20	10922030	10944646	+	protein_coding	solute carrier family 12 (potassium/chloride transporter), member 5 [Source:HGNC Symbol;Acc:HGNC:13818]	-0.386604	0.322154	0.908312	0.985168	-3.95429	0.322135	0.0026048	0.0552249	-2.95001	0.322152	0.00651121	0.0554711	4.16021	0.322124	3.708e-07	0.000198494	-1.76441	0.322116	0.258821	0.858473	-2.31129	0.322138	0.141228	0.530609	-1.08763	0.322117	0.446549	0.942123
ENSGALG00000007543	Pgo2	chr20	11503875	11517756	+	protein_coding	Uncharacterized protein [Source:UniProtKB/TrEMBL;Acc:F1NSX1]	-0.913224	1.31678	0.595903	0.879789	-0.704626	1.31677	0.716358	0.925531	-3.26972	1.31678	0.00395619	0.0381045	-5.57561	1.31676	0.000253506	0.0222338	0.600628	1.31675	0.458839	0.945929	1.86057	1.31677	0.0403547	0.283616	1.24445	1.31675	0.146828	0.699641
ENSGALG00000008014	CEBPB	chr20	14054696	14055682	-	protein_coding	CCAAT/enhancer-binding protein beta [Source:UniProtKB/Swiss-Prot;Acc:Q05826]	-0.193196	0.897333	0.923643	0.990063	-0.180428	0.897317	0.938036	0.996459	-1.74551	0.897332	0.0139743	0.0952971	2.93395	0.897308	8.54255e-07	0.000352104	-1.06299	0.897302	0.271566	0.870412	-1.21138	0.89732	0.218188	0.641323	-1.38969	0.897303	0.111782	0.630132
ENSGALG00000001115	MMEL1	chr21	1387460	1411822	+	protein_coding	membrane metallo-endopeptidase-like 1 [Source:HGNC Symbol;Acc:HGNC:14668]	-1.14197	1.88055	0.492988	0.825222	0.237269	1.88054	0.682087	0.915503	-1.09134	1.88055	0.330723	0.648625	2.99412	1.88054	0.000691415	0.0395489	-2.38295	1.88054	0.139284	0.687555	-0.288473	1.88055	0.985732	1	-2.70981	1.88054	0.0572426	0.459449
ENSGALG00000002005		chr21	2679190	2699394	-	protein_coding	protein tyrosine phosphatase, non-receptor type 11-like [Source:RefSeq peptide;Acc:NP_001026046]	-4.80862	4.53557	3.5873e-08	6.05692e-06	-0.287776	4.53557	0.73673	0.932827	0.980196	4.53557	0.0309401	0.165874	-2.70257	4.53557	0.00101974	0.0478866	-0.122265	4.53557	0.934034	1	0.565279	4.53557	0.298552	0.724988	0.606832	4.53557	0.231888	0.826929
ENSGALG00000002888	CASZ1	chr21	3826146	3869802	-	protein_coding	castor zinc finger 1 [Source:HGNC Symbol;Acc:HGNC:26002]	0.219524	1.37658	0.69266	0.916351	-1.64173	1.37658	0.346321	0.736135	2.03484	1.37658	0.0145341	0.0978067	-5.65955	1.37657	0.000579589	0.0357395	-5.44718	1.37657	0.00125632	0.0926633	0.972267	1.37658	0.292069	0.717073	-1.91747	1.37657	0.19859	0.783294
ENSGALG00000003782	Pax-7	chr21	4442610	4530774	+	protein_coding	paired box protein Pax-7 [Source:RefSeq peptide;Acc:NP_990396]	-3.47581	4.70128	0.000161404	0.00616204	0.0871235	4.70128	0.805793	0.958613	1.91903	4.70128	7.11062e-05	0.00187309	-4.41573	4.70128	1.27102e-05	0.0026851	0.432841	4.70128	0.446179	0.942601	-1.72187	4.70128	0.0482257	0.309551	-0.419914	4.70128	0.596087	0.971516
ENSGALG00000004631	DRAXIN	chr21	5645770	5657774	-	protein_coding	Draxin [Source:UniProtKB/Swiss-Prot;Acc:B6ZI38]	-3.95943	6.41552	7.45325e-07	8.35599e-05	-1.09852	6.41552	0.114153	0.434212	2.70346	6.41552	8.98386e-12	2.17069e-09	-3.09695	6.41552	0.000102977	0.0124407	-1.64464	6.41552	0.0206529	0.276546	-2.33756	6.41552	0.00195808	0.0542224	0.324419	6.41552	0.486694	0.951826
ENSGALG00000026250	DOK2	chr22	1376680	1381157	+	protein_coding	docking protein 2, 56kDa [Source:HGNC Symbol;Acc:HGNC:2991]	-2.28355	-0.153152	0.057954	0.283876	1.28066	-0.153167	0.118878	0.442601	-2.80969	-0.153154	0.000163097	0.00358813	3.45803	-0.153175	7.69231e-06	0.00179667	-2.65963	-0.15318	0.0128095	0.226991	-2.65247	-0.153164	0.0198565	0.196518	-2.70012	-0.15318	0.00377274	0.0999454
ENSGALG00000001608	UNC5D	chr22	1850667	1902149	+	protein_coding	unc-5 homolog D (C. elegans) [Source:HGNC Symbol;Acc:HGNC:18634]	-0.303301	1.42591	0.961939	1	-1.57477	1.42592	0.333147	0.726142	2.56121	1.42591	0.00104338	0.0141274	-5.72862	1.42592	0.000258292	0.0224677	-1.13004	1.42592	0.50707	0.961237	-0.26165	1.42591	1	1	-1.88501	1.42592	0.17794	0.754138
ENSGALG00000000604	NKAIN1	chr23	539359	544026	-	protein_coding	Na+/K+ transporting ATPase interacting 1 [Source:HGNC Symbol;Acc:HGNC:25743]	-1.57525	0.565871	0.192419	0.551964	0.262358	0.565873	0.658147	0.903445	1.29094	0.565871	0.0528492	0.236321	-4.21077	0.565875	0.000479582	0.0320041	1.37095	0.565875	0.0777921	0.544817	-2.96833	0.565873	0.0204998	0.200371	-0.818633	0.565875	0.466329	0.946682
ENSGALG00000021812		chr23	823570	860967	+	protein_coding	Uncharacterized protein [Source:UniProtKB/TrEMBL;Acc:F1P432]	0.507353	0.0931273	0.468277	0.813189	0.380717	0.0931326	0.569223	0.865666	-0.119028	0.0931278	0.968201	0.993947	-3.41997	0.0931356	0.0010104	0.0477159	0.0911851	0.0931375	0.803631	0.991713	1.06908	0.0931316	0.16343	0.567456	-0.900987	0.0931372	0.398683	0.926069
ENSGALG00000013409		chr23	2028529	2029895	+	protein_coding	Uncharacterized protein [Source:UniProtKB/TrEMBL;Acc:F1NHB8]	-1.65083	0.182388	0.130049	0.451081	2.08981	0.182371	0.00302613	0.0592917	0.641732	0.182387	0.296442	0.615657	-3.63362	0.182361	0.000330844	0.0265637	0.0857418	0.182354	0.810256	0.991713	-3.63568	0.182374	0.000447444	0.0208322	-0.604088	0.182355	0.55947	0.965682
ENSGALG00000009680	PAQR7	chr23	3204152	3207296	+	protein_coding	progestin and adipoQ receptor family member VII [Source:RefSeq peptide;Acc:NP_001157123]	-2.32572	3.03626	0.00447204	0.0606718	-0.572013	3.03626	0.482947	0.822841	1.73915	3.03626	0.000177537	0.00377542	-4.33145	3.03626	4.68533e-06	0.0012627	0.313863	3.03626	0.548744	0.968186	-1.25753	3.03626	0.122078	0.493025	0.232893	3.03626	0.628764	0.973061
ENSGALG00000004221	IL22RA1	chr23	5614425	5622751	-	protein_coding	interleukin 22 receptor, alpha 1 [Source:HGNC Symbol;Acc:HGNC:13700]	-4.09565	0.381008	0.00386608	0.0552398	1.32993	0.381025	0.159046	0.515998	-1.11129	0.381009	0.348488	0.662736	3.04297	0.381034	0.00102935	0.0479247	-4.09114	0.381041	0.00429755	0.143395	-1.03204	0.381022	0.599097	0.900059	-4.13611	0.38104	0.000992421	0.0525842
ENSGALG00000007614		chr24	5549650	5551430	+	protein_coding	Uncharacterized protein [Source:UniProtKB/TrEMBL;Acc:E1C9B3]	-1.1058	-0.436089	0.130124	0.451081	-1.10468	-0.436092	0.13173	0.467595	-1.19994	-0.436089	0.0133855	0.0925975	2.29188	-0.436094	0.000315983	0.0258958	-1.10196	-0.436095	0.140554	0.689965	1.04478	-0.436092	0.102002	0.454323	-1.12819	-0.436095	0.0732284	0.51987
ENSGALG00000019019	NTRK1	chr25	416281	424122	-	protein_coding	high affinity nerve growth factor receptor precursor [Source:RefSeq peptide;Acc:NP_990709]	-5.47385	2.02032	7.63377e-05	0.00350753	2.2192	2.0203	0.00362469	0.0648749	-0.974041	2.02032	0.276907	0.598432	-4.98372	2.02029	0.000552071	0.0347633	0.919198	2.02029	0.238011	0.836912	1.06547	2.0203	0.179282	0.593261	-2.90845	2.02029	0.0123495	0.189913
ENSGALG00000013234	HAPLN2	chr25	508028	510241	-	protein_coding	hyaluronan and proteoglycan link protein 2 [Source:HGNC Symbol;Acc:HGNC:17410]	-5.19495	1.02642	0.000227841	0.00788385	-1.1096	1.02644	0.494123	0.829559	3.95965	1.02642	2.72919e-08	2.69344e-06	-5.17854	1.02646	0.000354492	0.0275992	-0.816002	1.02647	0.640348	0.980375	-5.18253	1.02644	0.00058428	0.0258058	-2.54576	1.02646	0.0587243	0.464164
ENSGALG00000014640	GOLPH3L	chr25	1500771	1503713	+	protein_coding	golgi phosphoprotein 3-like [Source:HGNC Symbol;Acc:HGNC:24882]	-0.699908	1.15878	0.644853	0.899069	-1.82763	1.15879	0.177054	0.543667	-0.410318	1.15878	0.704857	0.881401	-5.36604	1.1588	6.8022e-05	0.00943822	-1.11588	1.1588	0.466034	0.948792	0.903502	1.15879	0.270698	0.697847	2.0247	1.1588	0.00873466	0.157336
ENSGALG00000000568	LGR6	chr26	397071	465917	+	protein_coding	leucine-rich repeat containing G protein-coupled receptor 6 [Source:HGNC Symbol;Acc:HGNC:19719]	-0.971273	0.932718	0.43891	0.794776	1.16093	0.932713	0.135453	0.475269	0.681472	0.932718	0.305034	0.625055	-5.02805	0.932709	3.47636e-05	0.0057315	-0.325478	0.932707	0.886757	0.998615	-1.86035	0.932714	0.145798	0.538633	0.649606	0.932708	0.363013	0.90828
ENSGALG00000001091	C1orf116	chr26	2547059	2552305	-	protein_coding	chromosome 1 open reading frame 116 [Source:HGNC Symbol;Acc:HGNC:28667]	-1.04476	2.12296	0.42981	0.78969	-1.38095	2.12295	0.293839	0.693964	1.14969	2.12296	0.0995622	0.34376	-6.59113	2.12295	3.26328e-06	0.000933299	-1.27356	2.12295	0.337825	0.905764	1.27314	2.12295	0.118016	0.483874	0.270966	2.12295	0.656342	0.976745
ENSGALG00000028858		chr26	3087400	3091783	+	protein_coding	Uncharacterized protein [Source:UniProtKB/TrEMBL;Acc:R4GJF2]	-1.33112	0.0597144	0.372038	0.747262	-3.13249	0.0597091	0.0146755	0.144324	-0.666403	0.0597139	0.543123	0.801192	2.87279	0.0597061	0.000805418	0.0436928	0.407577	0.0597041	0.565729	0.968906	-1.26303	0.05971	0.433997	0.822905	-1.45126	0.0597044	0.264489	0.857999
ENSGALG00000001373	TRAF3IP3	chr26	3097402	3106046	+	protein_coding	TRAF3 interacting protein 3 [Source:HGNC Symbol;Acc:HGNC:30766]	-3.0704	-0.034253	0.0116045	0.107753	-3.06714	-0.034257	0.011389	0.125551	-3.22241	-0.0342534	0.000180691	0.0038137	4.61065	-0.0342592	1.30457e-08	1.21882e-05	-3.06578	-0.0342606	0.0127954	0.226991	-3.05855	-0.0342563	0.0209769	0.202878	-0.229518	-0.0342604	0.979664	1
ENSGALG00000003447	FRS3	chr26	4989811	4997320	-	protein_coding	fibroblast growth factor receptor substrate 3 [Source:HGNC Symbol;Acc:HGNC:16970]	-0.354087	2.86205	0.763057	0.937391	-0.0248298	2.86204	1	1	0.21605	2.86205	0.668198	0.864591	-3.7445	2.86204	0.000744703	0.0419127	0.161044	2.86204	0.733934	0.989366	0.79943	2.86204	0.228632	0.653304	0.240483	2.86204	0.650271	0.976745
ENSGALG00000000371	CRHR1	chr27	2226991	2253136	+	protein_coding	corticotropin-releasing factor receptor 1 precursor [Source:RefSeq peptide;Acc:NP_989652]	-6.31752	1.87951	0.000456036	0.0131507	-6.31337	1.87951	0.000447934	0.0189077	-0.463904	1.87951	0.77005	0.910136	-6.30087	1.87951	0.000632087	0.0376939	-6.31321	1.87951	0.000518841	0.0645105	3.21194	1.87951	0.000878076	0.0335186	0.929252	1.87951	0.313236	0.886684
ENSGALG00000013454	HOXB1	chr27	3662963	3664600	+	protein_coding	homeobox protein Hox-B1 [Source:RefSeq peptide;Acc:NP_001074328]	-1.65707	1.33144	0.213744	0.581519	-0.254488	1.33145	0.956169	1	3.19375	1.33144	1.72721e-06	9.56722e-05	-4.87257	1.33146	0.000916722	0.0452052	-1.75075	1.33146	0.204149	0.7966	-3.69071	1.33145	0.0107921	0.142963	-1.42896	1.33146	0.228396	0.824345
ENSGALG00000027281	PNMT	chr27	4232205	4234052	+	protein_coding	phenylethanolamine N-methyltransferase [Source:HGNC Symbol;Acc:HGNC:9160]	-0.0220517	0.208263	1	1	-0.922026	0.20826	0.491603	0.827272	-1.50371	0.208262	0.0936194	0.331058	3.18974	0.208258	1.66628e-05	0.00343401	-1.83693	0.208257	0.192753	0.780931	-3.05998	0.20826	0.0145788	0.168849	-0.70657	0.208257	0.561838	0.965682
ENSGALG00000027818	RDH8	chr27	4255937	4259878	+	protein_coding	retinol dehydrogenase 8 (all-trans) [Source:HGNC Symbol;Acc:HGNC:14423]	-1.61118	0.428757	0.192834	0.552408	-0.244644	0.428774	0.951539	1	0.547927	0.428759	0.408936	0.710756	-4.17485	0.428784	0.000337493	0.026721	-0.164918	0.42879	1	1	1.07722	0.428771	0.179504	0.593376	0.466984	0.428789	0.501556	0.954801
ENSGALG00000001544	ADAMTS10	chr28	1745352	1791963	-	protein_coding	ADAM metallopeptidase with thrombospondin type 1 motif, 10 [Source:HGNC Symbol;Acc:HGNC:13201]	-2.70513	0.795585	0.0129182	0.114078	-0.349225	0.795558	0.80965	0.960016	-1.397	0.795582	0.0707148	0.281127	2.24905	0.795543	0.00102565	0.0479113	-0.723281	0.795533	0.517499	0.96495	0.820408	0.795563	0.246033	0.670799	-0.543816	0.795534	0.587931	0.969529
ENSGALG00000001414	MUC16	chr28	1851800	1862161	-	protein_coding	mucin 16, cell surface associated [Source:HGNC Symbol;Acc:HGNC:15582]	0.359887	-0.330373	0.585021	0.873853	-1.85651	-0.33038	0.0407139	0.251129	-1.98441	-0.330374	0.00165537	0.0200852	3.49916	-0.330383	7.88238e-07	0.000334738	-1.85397	-0.330385	0.0447811	0.40277	-1.84783	-0.330378	0.0613721	0.348292	-1.70074	-0.330385	0.0523687	0.435546
ENSGALG00000001273	C2CD4C	chr28	2575133	2576389	-	protein_coding	C2 calcium-dependent domain containing 4C [Source:HGNC Symbol;Acc:HGNC:29417]	-1.18663	-0.426783	0.121303	0.434755	-1.18556	-0.42679	0.12238	0.449431	0.504058	-0.426784	0.359779	0.671454	2.26416	-0.426793	0.000678619	0.0394613	-1.18265	-0.426795	0.130971	0.677032	-1.17738	-0.426789	0.160882	0.564074	-1.21005	-0.426795	0.0672275	0.49848
ENSGALG00000021620	TMEM59L	chr28	3643257	3650421	-	protein_coding	transmembrane protein 59-like [Source:HGNC Symbol;Acc:HGNC:13237]	-1.84507	-0.332361	0.0345519	0.209524	-0.605473	-0.332373	0.655154	0.902676	-1.08282	-0.332362	0.167856	0.461819	3.26675	-0.332379	2.82273e-06	0.000841655	-0.353625	-0.332383	0.855854	0.995595	-1.83392	-0.332371	0.0525825	0.322349	-1.87534	-0.332382	0.0146477	0.209558
ENSGALG00000028564	GRP	chrZ	911812	916640	+	protein_coding	Gastrin-releasing peptide Neuromedin-C [Source:UniProtKB/Swiss-Prot;Acc:P01295]	-3.29862	0.0477298	0.00645928	0.0757779	-1.2687	0.0477076	0.417863	0.784977	-3.45316	0.0477276	5.96942e-05	0.00164353	4.26115	0.0476952	8.70036e-08	6.4172e-05	-0.349465	0.0476871	0.936151	1	-3.28632	0.0477116	0.0122376	0.154694	-1.3804	0.0476882	0.290306	0.873978
ENSGALG00000002452	AQP3	chrZ	7053682	7068826	-	protein_coding	aquaporin 3 (Gill blood group) [Source:HGNC Symbol;Acc:HGNC:636]	-3.04621	-0.0397933	0.0142918	0.121049	-3.04306	-0.039809	0.0139585	0.140024	-3.19762	-0.0397948	0.000269057	0.00508849	5.76223	-0.0398178	6.57435e-14	9.21329e-10	-3.04164	-0.0398235	0.0156015	0.246759	-3.03418	-0.0398061	0.0254952	0.222333	-3.08372	-0.0398227	0.00492114	0.113243
ENSGALG00000014903	ITGA2	chrZ	15721124	15783248	+	protein_coding	integrin, alpha 2 (CD49B, alpha 2 subunit of VLA-2 receptor) [Source:HGNC Symbol;Acc:HGNC:6137]	-2.49454	2.62088	0.0614263	0.292699	0.939673	2.62088	0.239232	0.629951	1.40906	2.62088	0.0439449	0.210042	-6.43791	2.62088	3.55009e-05	0.005785	-1.35857	2.62088	0.304884	0.887815	0.163836	2.62088	0.733887	0.945951	-0.253827	2.62088	0.906269	0.996871
ENSGALG00000014914	SNX18	chrZ	16311846	16329239	+	protein_coding	sorting nexin 18 [Source:HGNC Symbol;Acc:HGNC:19245]	0.51806	0.998247	0.464801	0.810167	-0.953411	0.998227	0.455122	0.806841	0.540191	0.998245	0.403438	0.707077	-5.1224	0.998216	2.41303e-05	0.00456976	-0.125781	0.998208	1	1	0.905021	0.99823	0.240069	0.663183	-0.250856	0.998209	0.890371	0.995278
ENSGALG00000015028	RFLB	chrZ	27483980	27486468	-	protein_coding	relaxin 3 precursor [Source:RefSeq peptide;Acc:NP_001106671]	-0.282944	0.363836	0.928095	0.991286	0.359261	0.363838	0.589896	0.874979	-1.39219	0.363837	0.121482	0.387183	-4.03949	0.363839	0.000443921	0.0306696	0.437848	0.36384	0.523264	0.96537	-0.971603	0.363838	0.484316	0.849467	1.8627	0.36384	0.0119933	0.186541
ENSGALG00000015126	TRPM3	chrZ	34939812	35198504	-	protein_coding	transient receptor potential cation channel, subfamily M, member 3 [Source:HGNC Symbol;Acc:HGNC:17992]	-4.88875	0.824315	0.000283769	0.00929144	-2.78199	0.82435	0.0604402	0.3114	0.278421	0.824319	0.662496	0.861805	-4.87243	0.824369	0.000438155	0.0306696	1.35886	0.824382	0.121093	0.655969	2.07409	0.824344	0.0174786	0.183827	-1.21003	0.82438	0.359377	0.9081
ENSGALG00000025866		chrZ	40882340	40883129	-	protein_coding	Uncharacterized protein [Source:UniProtKB/TrEMBL;Acc:R4GGU7]	-1.52819	0.164154	0.156173	0.499228	-1.16514	0.164184	0.314182	0.71018	2.54479	0.164157	2.01012e-05	0.000722303	-3.60746	0.1642	0.000391144	0.0293128	-1.78496	0.164211	0.10252	0.61477	-0.236082	0.164178	0.937208	0.997314	-0.59462	0.164209	0.624712	0.972559
ENSGALG00000015551	GRIN3A	chrZ	64830090	64898868	+	protein_coding	glutamate receptor, ionotropic, N-methyl-D-aspartate 3A [Source:HGNC Symbol;Acc:HGNC:16767]	3.56143	0.930423	1.7304e-05	0.00108258	0.284878	0.930418	0.649488	0.899045	-1.89111	0.930423	0.0858297	0.314673	-5.0237	0.930414	0.00068238	0.039516	-4.36245	0.930412	0.00468951	0.148685	-2.85799	0.930419	0.0815617	0.403461	-0.522738	0.930413	0.768605	0.987256
ENSGALG00000001840	TEK	chrZ	68386224	68425628	+	protein_coding	TEK tyrosine kinase, endothelial [Source:HGNC Symbol;Acc:HGNC:11724]	-0.514009	2.51779	0.249372	0.627751	3.26058	2.51779	4.03482e-32	5.6544e-28	-0.0763991	2.51779	0.832126	0.93737	-2.22151	2.5178	5.73846e-06	0.00146216	-2.50546	2.5178	1.82245e-07	0.000319247	-2.6454	2.51779	1.17097e-07	2.98363e-05	-2.32001	2.5178	8.47522e-08	0.000131969
ENSGALG00000028089		chrLGE22C19W28_E50C23	657674	663371	+	protein_coding	Uncharacterized protein [Source:UniProtKB/TrEMBL;Acc:R4GGI4]	1.12781	0.365182	0.127496	0.446235	-0.521733	0.365211	0.710952	0.923569	-1.93992	0.365185	0.01947	0.120359	2.48226	0.365227	0.000535634	0.0342757	0.0363453	0.365237	0.854869	0.995523	-3.29296	0.365205	0.00504992	0.0949201	-2.8468	0.365236	0.00507438	0.114697
ENSGALG00000025837		chrUn_AADN03021576	2036	3262	+	protein_coding	Uncharacterized protein [Source:UniProtKB/TrEMBL;Acc:R4GF69]	-1.92337	-0.319066	0.0294307	0.191034	0.244016	-0.319071	0.686507	0.916341	-2.0513	-0.319066	0.000900302	0.0126433	3.28503	-0.319074	2.67319e-06	0.000814394	-0.747263	-0.319077	0.597604	0.975517	-1.91247	-0.31907	0.0454645	0.300367	-1.33064	-0.319076	0.180563	0.759427
ENSGALG00000028794		chrUn_AADN03025606	47	1673	-	protein_coding	Uncharacterized protein [Source:UniProtKB/TrEMBL;Acc:R4GJ76]	-3.87741	0.283541	0.000137329	0.00548601	1.4347	0.283521	0.0533192	0.291091	0.747496	0.283539	0.23802	0.553877	-3.86242	0.283509	0.000242948	0.0216858	0.974737	0.283502	0.188483	0.776672	-3.86477	0.283524	0.000335154	0.0176573	-0.161139	0.283503	0.96661	1
ENSGALG00000000139		chrUn_AADN03025856	21	1162	+	protein_coding	Uncharacterized protein [Source:UniProtKB/TrEMBL;Acc:F1NT07]	-2.84267	0.416397	0.0131308	0.115009	1.69441	0.416373	0.0244724	0.192636	0.688732	0.416395	0.290505	0.610183	-4.13553	0.416359	0.000193977	0.0191136	0.554881	0.416351	0.436153	0.939692	-4.13816	0.416377	0.000275814	0.0153003	-0.037953	0.416352	1	1
ENSGALG00000000043	USF1	chrUn_JH376253	2868	4211	+	protein_coding	Gallus gallus upstream transcription factor 1 (USF1), mRNA. [Source:RefSeq mRNA;Acc:NM_001007485]	-0.570541	-0.0109308	0.561117	0.861337	-1.88105	-0.0109554	0.0299887	0.212898	1.28124	-0.0109332	0.0125529	0.0882927	-3.12721	-0.0109691	0.000119145	0.013958	0.111375	-0.0109781	0.783144	0.991713	-0.380316	-0.0109509	0.744733	0.948876	0.546422	-0.0109768	0.33949	0.898013

## Sheet: HH15_trailers_v_all_other_inviv
ensid	Name	Chr	Start	End	Strand	Biotype	Description	HH15_Invasive_Front_v_other.log2fc	HH15_Invasive_Front_v_other.log2cpm	HH15_Invasive_Front_v_other.pval	HH15_Invasive_Front_v_other.padj	HH13_Invasive_Front_v_other.log2fc	HH13_Invasive_Front_v_other.log2cpm	HH13_Invasive_Front_v_other.pval	HH13_Invasive_Front_v_other.padj	HH11_Invasive_Front_v_other.log2fc	HH11_Invasive_Front_v_other.log2cpm	HH11_Invasive_Front_v_other.pval	HH11_Invasive_Front_v_other.padj	HH15_Leader_v_other.log2fc	HH15_Leader_v_other.log2cpm	HH15_Leader_v_other.pval	HH15_Leader_v_other.padj	HH13_Leader_v_other.log2fc	HH13_Leader_v_other.log2cpm	HH13_Leader_v_other.pval	HH13_Leader_v_other.padj	HH15_Trailer_v_other.log2fc	HH15_Trailer_v_other.log2cpm	HH15_Trailer_v_other.pval	HH15_Trailer_v_other.padj	HH13_Trailer_v_other.log2fc	HH13_Trailer_v_other.log2cpm	HH13_Trailer_v_other.pval	HH13_Trailer_v_other.padj
ENSGALG00000008449		chr1	1177700	1258653	-	protein_coding	Uncharacterized protein [Source:UniProtKB/TrEMBL;Acc:F1P3M4]	-4.39406	0.54231	0.00433075	0.0595595	-4.39021	0.542303	0.00418404	0.0700574	-4.55779	0.542309	3.05854e-05	0.0010038	0.955023	0.542298	0.31379	0.811062	0.278203	0.542296	0.656221	0.981678	3.50218	0.542304	0.000184174	0.0117319	-4.26403	0.542296	0.00307645	0.0867185
ENSGALG00000008298	P37NB	chr1	12679724	12694908	+	protein_coding	leucine-rich repeat-containing protein 17 precursor [Source:RefSeq peptide;Acc:NP_001185529]	-3.54561	1.45717	0.0364821	0.215449	-5.77444	1.45715	0.000264933	0.0129365	-1.52024	1.45717	0.188244	0.490413	-1.78052	1.45714	0.311681	0.807972	-4.5976	1.45713	0.00732156	0.17127	5.0567	1.45715	2.09513e-10	1.27657e-07	-2.66486	1.45713	0.0730219	0.519387
ENSGALG00000008635		chr1	20126933	20130565	-	protein_coding	Uncharacterized protein [Source:UniProtKB/TrEMBL;Acc:F1NLQ7]	3.69167	6.65201	2.96665e-05	0.00166966	-0.0163403	6.65201	0.842097	0.968657	-9.68937	6.65201	1.0438e-09	1.53977e-07	1.05981	6.65201	0.258487	0.761373	-10.2482	6.65201	6.56396e-06	0.00511041	-10.9922	6.65201	3.53732e-06	0.000505836	-8.78939	6.65201	6.75156e-06	0.00497981
ENSGALG00000029113		chr1	24479734	24484331	+	protein_coding	Protein Wnt [Source:UniProtKB/TrEMBL;Acc:R4GKR2]	1.08084	0.352652	0.183811	0.541362	0.743566	0.352624	0.347352	0.736936	0.219611	0.352649	0.708412	0.883246	-4.00487	0.352609	0.000860609	0.0441779	-1.51644	0.352599	0.292998	0.882836	-4.00752	0.352629	0.00128614	0.0423006	0.841518	0.3526	0.275335	0.860058
ENSGALG00000010148	PTPRR	chr1	35865662	36009723	-	protein_coding	protein tyrosine phosphatase, receptor type, R [Source:HGNC Symbol;Acc:HGNC:9680]	-1.70038	3.27655	0.21564	0.58441	-2.64879	3.27655	0.0623116	0.316709	-1.02854	3.27655	0.293424	0.612486	1.15278	3.27654	0.172626	0.657566	-1.12877	3.27654	0.4297	0.937595	2.89341	3.27655	0.000271812	0.0152367	-3.91119	3.27654	0.00316275	0.0882924
ENSGALG00000010958	PPFIA2	chr1	40131212	40428161	-	protein_coding	protein tyrosine phosphatase, receptor type, f polypeptide (PTPRF), interacting protein (liprin), alpha 2 [Source:HGNC Symbol;Acc:HGNC:9246]	0.48226	1.23865	0.496582	0.827725	0.928487	1.23865	0.234472	0.622583	1.81993	1.23865	0.00702009	0.058734	-2.78704	1.23865	0.0370392	0.308643	-3.52842	1.23865	0.00892998	0.189254	-4.6183	1.23865	0.00102188	0.036592	-1.31734	1.23865	0.243017	0.836955
ENSGALG00000011740	MGP	chr1	47886140	47891373	+	protein_coding	Matrix Gla protein [Source:UniProtKB/Swiss-Prot;Acc:O42413]	1.14994	0.903308	0.195363	0.555564	-5.01476	0.903359	0.000378731	0.0171211	1.11862	0.903313	0.156286	0.444529	-4.60333	0.903387	0.00326959	0.0909128	0.758988	0.903405	0.368833	0.915384	-5.00659	0.903349	0.000924832	0.0342287	0.0223362	0.903403	0.849108	0.993064
ENSGALG00000012285	BAIAP2L2	chr1	50856306	50864314	+	protein_coding	BAI1-associated protein 2-like 2 [Source:HGNC Symbol;Acc:HGNC:26203]	-3.1206	-0.013767	0.0121865	0.110324	-3.11748	-0.013791	0.0119213	0.128611	-3.27285	-0.0137694	0.000199625	0.00409011	-3.10666	-0.0138044	0.0145171	0.187333	1.89015	-0.0138132	0.0391643	0.379563	3.1582	-0.0137867	0.000253801	0.0145174	-3.15835	-0.0138119	0.00405439	0.103306
ENSGALG00000003213	LGALS2	chr1	51050593	51062352	+	protein_coding	lectin, galactoside-binding, soluble, 2 [Source:HGNC Symbol;Acc:HGNC:6562]	0.773237	0.227074	0.319521	0.702174	0.204491	0.227093	0.70066	0.921112	0.883675	0.227076	0.200765	0.507428	-3.75226	0.227103	0.000852031	0.0441766	-0.165885	0.22711	1	1	-3.75573	0.22709	0.00124975	0.0416999	0.18053	0.227109	0.740062	0.984175
ENSGALG00000012457	SS3R	chr1	51269724	51274129	+	protein_coding	somatostatin receptor type 3 [Source:RefSeq peptide;Acc:NP_001019754]	-4.39766	0.541984	0.00370785	0.0540905	-4.39379	0.541986	0.0035956	0.064767	-4.5615	0.541984	2.26421e-05	0.000803307	0.842964	0.541988	0.357344	0.835358	-4.2083	0.541989	0.00979763	0.196429	4.5513	0.541986	1.70612e-07	4.12233e-05	-4.43863	0.541989	0.000935786	0.0520934
ENSGALG00000012647	RFX4	chr1	53674650	53748422	-	protein_coding	regulatory factor X, 4 (influences HLA class II expression) [Source:HGNC Symbol;Acc:HGNC:9985]	-3.27419	2.40246	0.0420582	0.232523	-0.017037	2.40247	1	1	2.76592	2.40246	0.000328483	0.00593216	-0.259018	2.40248	1	1	-5.99642	2.40248	0.000541078	0.0654638	-6.92327	2.40247	6.54547e-05	0.00546002	-0.865329	2.40248	0.561233	0.965682
ENSGALG00000012751	STAB2	chr1	54927408	55004223	-	protein_coding	stabilin 2 [Source:HGNC Symbol;Acc:HGNC:18629]	1.56997	1.84649	0.0972496	0.385096	2.88667	1.84648	0.00161738	0.0431335	-2.55204	1.84649	0.0351905	0.180456	-3.0984	1.84647	0.0881137	0.479625	-1.12757	1.84647	0.543469	0.967773	-5.99103	1.84648	0.00113626	0.0391243	-1.72431	1.84647	0.251017	0.843713
ENSGALG00000019267		chr1	68099081	68106564	+	protein_coding	Uncharacterized protein [Source:UniProtKB/TrEMBL;Acc:F1NNZ8]	-1.33893	1.01275	0.396697	0.764284	1.13822	1.01275	0.202491	0.582812	-0.110282	1.01275	1	1	2.23002	1.01274	0.013732	0.181035	-2.27925	1.01274	0.144079	0.698917	-5.15112	1.01275	0.000819693	0.0320871	-1.22941	1.01274	0.379258	0.915243
ENSGALG00000015347	ZPLD1	chr1	84961484	84992403	+	protein_coding	zona pellucida-like domain containing 1 [Source:HGNC Symbol;Acc:HGNC:27022]	-9.10458	4.42578	0.000186243	0.00683247	-8.21178	4.42579	0.00172921	0.0442637	3.30741	4.42578	0.00070428	0.0104671	1.21496	4.42579	0.257396	0.759721	-3.61569	4.42579	0.116906	0.648069	-8.7288	4.42579	0.00153351	0.0480774	-4.76517	4.42579	0.0227285	0.267661
ENSGALG00000015358	myosin	chr1	86879998	86923778	-	protein_coding	myosin heavy chain, cardiac muscle isoform [Source:RefSeq peptide;Acc:NP_990097]	6.06334	6.20652	4.36631e-30	3.05947e-26	-2.57961	6.20652	0.0200859	0.173435	-2.90246	6.20652	0.000429857	0.00720576	-4.34933	6.20652	0.000558138	0.0347633	-5.19653	6.20652	4.20868e-05	0.0168515	-4.23789	6.20652	0.000621472	0.0268774	-3.76838	6.20652	0.000357425	0.0365617
ENSGALG00000015379	TAGLN3	chr1	87951757	87962695	+	protein_coding	transgelin 3 [Source:HGNC Symbol;Acc:HGNC:29868]	-8.73993	5.44937	0.000173422	0.00647331	-9.29233	5.44937	8.37034e-05	0.00598479	-7.00474	5.44937	9.73792e-06	0.000411046	-0.270157	5.44937	0.960446	1	-9.47484	5.44937	4.85163e-05	0.0174518	5.76176	5.44937	7.35273e-11	5.15206e-08	-3.57279	5.44937	0.0400613	0.378569
ENSGALG00000015440	RCSD1	chr1	90911605	90946738	-	protein_coding	capZ-interacting protein [Source:RefSeq peptide;Acc:NP_001025960]	2.25467	3.46617	0.00298777	0.0469217	1.04868	3.46617	0.182082	0.553083	-2.26121	3.46617	0.0147907	0.0989386	0.36633	3.46618	0.581933	0.935123	-0.393514	3.46618	0.828429	0.991999	-5.83809	3.46617	0.000136362	0.00941367	-1.75694	3.46618	0.118347	0.643612
ENSGALG00000015467	CD101	chr1	91431223	91441019	+	protein_coding	CD101 molecule [Source:HGNC Symbol;Acc:HGNC:5949]	-0.147074	0.949854	0.850905	0.963607	0.474019	0.949844	0.294311	0.694489	0.374846	0.949853	0.328525	0.646895	-1.3551	0.949838	0.0281018	0.266634	0.723475	0.949835	0.110687	0.632356	-2.01104	0.949846	0.00141929	0.0453073	0.117398	0.949835	0.76246	0.98638
ENSGALG00000025730	RIPPLY3	chr1	106360956	106367003	+	protein_coding	ripply transcriptional repressor 3 [Source:HGNC Symbol;Acc:HGNC:3047]	-1.74833	2.17892	0.322365	0.704009	-0.65019	2.17891	0.794328	0.956004	-2.62215	2.17892	0.0352081	0.180471	-1.57632	2.1789	0.409311	0.868584	-3.2043	2.1789	0.0749925	0.534288	-6.65874	2.17891	0.000403458	0.0200499	4.18741	2.1789	6.90646e-07	0.000744516
ENSGALG00000016721	PLCXD1	chr1	129423877	129442045	-	protein_coding	PI-PLC X domain-containing protein 1 [Source:RefSeq peptide;Acc:NP_001122109]	-3.32692	0.0564254	0.00866889	0.0899882	-3.32358	0.0564123	0.00849606	0.103805	-3.48196	0.0564241	0.000106067	0.00258958	-0.404732	0.056405	0.92681	0.999973	-3.32233	0.0564002	0.00957864	0.194826	5.05754	0.0564147	1.49382e-11	1.23144e-08	-3.3654	0.0564009	0.00267779	0.0801041
ENSGALG00000016757	TSGA10	chr1	131821481	131853244	-	protein_coding	testis specific, 10 [Source:HGNC Symbol;Acc:HGNC:14927]	-2.08839	-0.289232	0.0165068	0.133406	-1.74607	-0.289226	0.0517867	0.288256	-2.08459	-0.289232	0.0014618	0.0183893	-0.904553	-0.289223	0.431584	0.880937	-2.08358	-0.289221	0.0187924	0.26548	3.71622	-0.289227	3.26934e-10	1.83266e-07	-0.345622	-0.289221	0.939034	1
ENSGALG00000016776	TBC1D8	chr1	132731877	132781402	-	protein_coding	TBC1 domain family, member 8 (with GRAM domain) [Source:HGNC Symbol;Acc:HGNC:17791]	-0.447502	2.94907	0.682192	0.912959	-0.904933	2.94908	0.360078	0.748696	-1.1675	2.94908	0.0992724	0.343084	-0.79761	2.94908	0.443554	0.886736	-0.353761	2.94909	0.772939	0.991438	2.53138	2.94908	4.76714e-05	0.00431011	-0.712	2.94909	0.42067	0.935807
ENSGALG00000016832	PROZ	chr1	136903332	136910194	-	protein_coding	protein Z, vitamin K-dependent plasma glycoprotein [Source:HGNC Symbol;Acc:HGNC:9460]	1.18391	0.788922	0.185903	0.543954	2.3045	0.788896	0.00993932	0.114773	-3.12049	0.78892	0.00525681	0.0474365	-0.376636	0.788881	0.941483	1	0.484733	0.788871	0.528894	0.966763	-4.79767	0.7889	0.00161043	0.0492764	-2.37916	0.788872	0.0835893	0.555547
ENSGALG00000026237		chr1	143534166	143535092	-	protein_coding		-0.625898	1.54077	0.352776	0.730232	-0.873015	1.54077	0.192101	0.565093	2.342	1.54077	6.86347e-10	1.09301e-07	-1.9244	1.54077	0.00692782	0.126786	-1.56633	1.54077	0.0226946	0.285399	-2.76151	1.54077	0.000160743	0.0106761	-0.135198	1.54077	0.867219	0.993537
ENSGALG00000016906	SPRY2	chr1	151896142	151897919	+	protein_coding	protein sprouty homolog 2 [Source:RefSeq peptide;Acc:NP_990131]	0.860704	5.56142	0.000982449	0.0229467	1.04536	5.56142	5.23075e-05	0.00441124	-0.618493	5.56142	0.0103154	0.076487	-0.307945	5.56142	0.341445	0.826106	0.463207	5.56142	0.0867495	0.570716	-2.11163	5.56142	7.14895e-10	3.37831e-07	-0.633406	5.56142	0.0261618	0.291904
ENSGALG00000016913	SLAIN1	chr1	153197741	153252919	-	protein_coding	SLAIN motif family, member 1 [Source:HGNC Symbol;Acc:HGNC:26387]	-0.793766	1.26207	0.56801	0.863809	-0.0400565	1.26209	1	1	0.499645	1.26208	0.455745	0.746963	-2.90123	1.26209	0.0337551	0.293897	-4.59026	1.2621	0.000715428	0.0726712	2.68206	1.26208	0.000467155	0.0216063	-3.62986	1.2621	0.0025719	0.0785243
ENSGALG00000016934		chr1	161176976	161182699	+	protein_coding	Uncharacterized protein [Source:UniProtKB/TrEMBL;Acc:F1NY34]	-5.2207	1.0485	0.00116656	0.0260322	-5.21666	1.04851	0.00114195	0.0355629	0.767846	1.0485	0.357537	0.669928	0.115853	1.04851	0.750205	0.974676	-5.21631	1.04851	0.00131566	0.0932898	3.00135	1.04851	0.0014794	0.0470122	-5.10226	1.04851	0.000658386	0.0447894
ENSGALG00000025748	Fgf9	chr1	177601063	177635306	-	protein_coding	glia-activating factor [Source:RefSeq peptide;Acc:NP_989730]	-5.50777	1.25447	0.00044351	0.0130028	-5.50373	1.25446	0.000444291	0.0188675	-2.35283	1.25447	0.0455343	0.215072	1.5711	1.25446	0.101363	0.5143	-5.50339	1.25445	0.000519302	0.0645105	3.47066	1.25446	8.86113e-05	0.00671586	-1.87233	1.25445	0.202865	0.790007
ENSGALG00000022720		chr1	178210944	178217940	+	protein_coding	Gap junction protein [Source:UniProtKB/TrEMBL;Acc:E1C2J9]	-0.814907	0.0245774	0.436882	0.79456	0.678626	0.0245613	0.313092	0.709157	-0.401466	0.0245758	0.620293	0.842057	-0.648954	0.0245523	0.578325	0.934541	-1.46856	0.0245464	0.135538	0.681706	2.10173	0.0245642	0.00141665	0.0453073	-1.68977	0.0245473	0.0495086	0.424091
ENSGALG00000017254	DLG2	chr1	188459667	189196267	-	protein_coding	discs, large homolog 2 (Drosophila) [Source:HGNC Symbol;Acc:HGNC:2901]	-1.43273	1.82867	0.372195	0.747269	-1.8294	1.82866	0.253116	0.646574	-1.42818	1.82867	0.195929	0.501882	0.235464	1.82866	0.680851	0.957977	-6.02825	1.82865	0.000248634	0.0446713	3.49389	1.82866	3.6578e-05	0.00355975	-1.39228	1.82865	0.322292	0.889087
ENSGALG00000022702	CHRNA10	chr1	193907281	193910675	+	protein_coding	neuronal acetylcholine receptor subunit alpha-10 precursor [Source:RefSeq peptide;Acc:NP_001094506]	-5.06566	0.946443	0.00271701	0.0442232	-5.06165	0.946442	0.002613	0.0553152	-5.23234	0.946443	1.28618e-05	0.00051352	-5.04939	0.946441	0.00333644	0.0917296	-5.0613	0.946441	0.0029564	0.122345	6.14544	0.946442	3.34054e-13	4.13738e-10	-1.33339	0.946441	0.441791	0.940597
ENSGALG00000017327	7	chr1	194498168	194499330	+	protein_coding	P2Y purinoceptor 3 [Source:UniProtKB/Swiss-Prot;Acc:Q98907]	-0.467836	1.07214	0.827557	0.957719	1.49752	1.07212	0.0837251	0.368023	0.165419	1.07214	0.761659	0.906103	1.37201	1.07211	0.118635	0.555853	-4.5014	1.0721	0.00461191	0.147456	-5.2345	1.07212	0.000330443	0.0175141	-0.744368	1.0721	0.59921	0.971516
ENSGALG00000017310	XRRA1	chr1	194938172	194949182	+	protein_coding	X-ray radiation resistance associated 1 [Source:HGNC Symbol;Acc:HGNC:18868]	-2.7091	-0.139916	0.0136725	0.117839	-1.60051	-0.139937	0.263379	0.658793	-2.85499	-0.139918	0.000235251	0.00460482	-2.69612	-0.139948	0.0165662	0.201527	1.31573	-0.139956	0.122374	0.657825	3.32456	-0.139933	2.01449e-05	0.00220556	-2.74503	-0.139955	0.00470734	0.111058
ENSGALG00000022693	TPBGL	chr1	195129611	195131082	-	protein_coding	trophoblast glycoprotein-like [Source:HGNC Symbol;Acc:HGNC:44159]	-1.13491	1.10642	0.256888	0.637851	1.91947	1.1064	0.00340249	0.0625341	0.492475	1.10642	0.38531	0.692895	-1.22743	1.10639	0.240052	0.739597	0.362366	1.10638	0.549231	0.968216	-5.28603	1.1064	8.3075e-07	0.000149258	-1.10115	1.10639	0.217516	0.810824
ENSGALG00000017302	SLCO2B1	chr1	195193901	195237670	-	protein_coding	solute carrier organic anion transporter family, member 2B1 [Source:HGNC Symbol;Acc:HGNC:10962]	-0.641737	1.85651	0.703595	0.919059	1.73117	1.85651	0.0412765	0.253266	0.351773	1.85651	0.59735	0.831224	-3.07437	1.85651	0.0430728	0.332107	1.16494	1.85651	0.168877	0.74605	-5.64719	1.85651	0.00040909	0.0201866	-1.62756	1.85651	0.194777	0.778984
ENSGALG00000005292	KLHL40	chr2	1999758	2009597	-	protein_coding	kelch-like family member 40 [Source:HGNC Symbol;Acc:HGNC:30372]	-1.32772	-0.2072	0.287367	0.67097	-2.45979	-0.207197	0.0114095	0.125551	-2.60463	-0.2072	0.000156485	0.0034896	-1.39081	-0.207195	0.288109	0.788468	-0.401659	-0.207194	0.876694	0.997725	4.0282	-0.207198	3.43021e-10	1.84888e-07	-2.33509	-0.207194	0.0124511	0.190699
ENSGALG00000023454	C9orf152	chr2	6174629	6180337	+	protein_coding	chromosome 9 open reading frame 152 [Source:HGNC Symbol;Acc:HGNC:31455]	-1.21354	-0.424165	0.115707	0.423928	0.892424	-0.424154	0.187259	0.559751	-0.830107	-0.424164	0.243259	0.560603	-1.20322	-0.424147	0.133905	0.585323	-1.20993	-0.424143	0.125411	0.665227	2.32918	-0.424156	0.000244546	0.0143392	-1.23777	-0.424144	0.0635402	0.48526
ENSGALG00000006797	ADARB2	chr2	10438685	10736438	-	protein_coding	adenosine deaminase, RNA-specific, B2 (non-functional) [Source:HGNC Symbol;Acc:HGNC:227]	-2.18593	0.633244	0.0931229	0.374469	-4.19821	0.633234	0.00126692	0.0378884	1.47023	0.633243	0.0366748	0.185857	-2.19156	0.633228	0.110244	0.537188	-0.739263	0.633224	0.617462	0.978416	-4.34354	0.633236	0.00119505	0.0402582	1.8592	0.633225	0.0149463	0.210967
ENSGALG00000010825	AGR2	chr2	28695781	28700020	-	protein_coding	anterior gradient 2 [Source:HGNC Symbol;Acc:HGNC:328]	-1.75394	2.3899	0.387592	0.757984	-0.972632	2.38989	0.688591	0.91656	0.45335	2.3899	0.574905	0.819761	1.33452	2.38988	0.197378	0.689282	1.55634	2.38987	0.132594	0.678663	-6.90299	2.38989	0.00120548	0.0404154	-1.72785	2.38988	0.326632	0.890428
ENSGALG00000019651	AGR3	chr2	28722114	28732817	-	protein_coding	anterior gradient protein 3 homolog precursor [Source:RefSeq peptide;Acc:NP_001186542]	-7.22424	2.65957	1.30244e-05	0.000877118	-3.44186	2.65958	0.0361043	0.234787	-0.613845	2.65957	0.601636	0.832958	-2.84756	2.65958	0.0908223	0.487844	-0.350861	2.65958	0.929184	1	3.15012	2.65958	0.000250965	0.0144412	0.0221549	2.65958	0.848981	0.993064
ENSGALG00000010865	TMEM196	chr2	29904943	29922802	-	protein_coding	transmembrane protein 196 [Source:HGNC Symbol;Acc:HGNC:22431]	3.12437	2.72271	0.00125299	0.0267673	-0.585715	2.7227	0.856456	0.972798	0.395446	2.72271	0.607289	0.83535	-1.11191	2.7227	0.627754	0.947398	-7.07043	2.7227	0.000500716	0.0643764	-7.27945	2.7227	0.000485635	0.0223871	-3.95851	2.7227	0.0241865	0.278742
ENSGALG00000027925	HOXA3	chr2	32803524	32818534	-	protein_coding	Homeobox protein Hox-A3 [Source:UniProtKB/Swiss-Prot;Acc:O93353]	1.08648	2.00252	0.0191055	0.145027	0.0985278	2.00253	0.784302	0.952894	0.915069	2.00252	0.0191589	0.118907	-0.252411	2.00253	0.731179	0.971408	-1.44036	2.00253	0.0209087	0.276822	-2.1872	2.00252	0.00106033	0.0374295	-0.854682	2.00253	0.119324	0.647391
ENSGALG00000011054	HOXA3	chr2	32917211	32919827	-	protein_coding	Homeobox protein Hox-A3 [Source:UniProtKB/Swiss-Prot;Acc:O93353]	1.68324	0.94422	0.0371774	0.217811	0.0497967	0.944228	0.825992	0.964701	0.756688	0.94422	0.281206	0.601516	-0.318393	0.944233	0.919057	0.999545	-1.88571	0.944236	0.153357	0.714714	-5.05327	0.944227	0.000140448	0.00955457	-1.08149	0.944236	0.362985	0.90828
ENSGALG00000011447	GADL1	chr2	40463088	40532241	-	protein_coding	glutamate decarboxylase-like 1 [Source:HGNC Symbol;Acc:HGNC:27949]	-2.44012	-0.210416	0.0249231	0.171244	-2.43745	-0.210427	0.0245878	0.192714	-2.58107	-0.210417	0.000719202	0.0105884	-2.42752	-0.210433	0.0290881	0.271054	-2.4355	-0.210437	0.0273021	0.314659	5.03597	-0.210425	1.7652e-21	4.94751e-18	-2.47474	-0.210436	0.00975807	0.167585
ENSGALG00000012097	AOAH	chr2	47255420	47310958	+	protein_coding	acyloxyacyl hydrolase (neutrophil) [Source:HGNC Symbol;Acc:HGNC:548]	-3.70815	0.177773	0.00806145	0.0865695	-3.70377	0.177897	0.00779121	0.0976619	-1.39808	0.177785	0.236009	0.550687	-3.03809	0.177965	0.0590331	0.394887	-3.70346	0.17801	0.00878474	0.188216	4.44917	0.177874	3.87618e-07	8.10757e-05	-0.589207	0.178004	0.807227	0.988392
ENSGALG00000012226	PPP1R17	chr2	49067176	49085386	-	protein_coding	protein phosphatase 1, regulatory subunit 17 [Source:HGNC Symbol;Acc:HGNC:16973]	-1.15242	6.13036	0.198563	0.560909	-0.885793	6.13036	0.331782	0.724895	-4.13587	6.13036	5.32516e-08	4.66156e-06	-0.173321	6.13036	0.930944	1	-2.16418	6.13036	0.0210793	0.277157	3.34551	6.13036	1.82065e-09	8.23049e-07	-0.302511	6.13036	0.748426	0.984456
ENSGALG00000012433	ADCY1	chr2	54794233	54967082	+	protein_coding	adenylate cyclase 1 (brain) [Source:HGNC Symbol;Acc:HGNC:232]	1.00888	0.72044	0.233543	0.606761	-0.965266	0.72042	0.549994	0.856783	0.581736	0.720438	0.420905	0.719556	1.6054	0.720409	0.068037	0.423335	-2.89292	0.720401	0.0447812	0.40277	-4.688	0.720424	0.000809614	0.0320423	-1.01233	0.720402	0.448032	0.943398
ENSGALG00000012735	EDN1	chr2	62756871	62762088	-	protein_coding	endothelin 1 [Source:HGNC Symbol;Acc:HGNC:3176]	2.75603	4.2876	0.000785193	0.0196144	1.09904	4.28759	0.199029	0.576755	-1.44658	4.2876	0.158581	0.447693	-0.0186446	4.28759	0.855798	0.987672	-1.58705	4.28759	0.281442	0.87656	-8.72558	4.28759	2.31759e-06	0.000345519	-5.15037	4.28759	0.00048172	0.039249
ENSGALG00000012941	CDH12	chr2	73046218	73413333	+	protein_coding	cadherin 12, type 2 (N-cadherin 2) [Source:HGNC Symbol;Acc:HGNC:1751]	-3.55407	0.915866	0.0294544	0.19109	-4.60496	0.915856	0.00409149	0.0691895	-4.0428	0.915865	0.000608574	0.00934124	1.05133	0.91585	0.254586	0.756407	0.193179	0.915846	0.709167	0.98509	3.29874	0.915858	0.000190286	0.0120409	-2.55021	0.915847	0.0769419	0.533266
ENSGALG00000012997	DNAH5	chr2	76596236	76706986	+	protein_coding	dynein, axonemal, heavy chain 5 [Source:HGNC Symbol;Acc:HGNC:2950]	0.500933	1.33223	0.518385	0.837733	1.31099	1.33223	0.152062	0.50438	-2.01897	1.33223	0.0736191	0.288355	-4.14056	1.33223	0.0167443	0.20259	1.15406	1.33223	0.205028	0.798758	-5.60517	1.33223	0.000581873	0.025805	0.819202	1.33223	0.331202	0.894309
ENSGALG00000013033		chr2	78346913	78357068	+	protein_coding	Uncharacterized protein [Source:UniProtKB/TrEMBL;Acc:E1BXS8]	-1.23314	0.174188	0.440501	0.795264	-0.840177	0.174193	0.643394	0.896008	-0.717989	0.174189	0.53865	0.798568	-0.647508	0.174195	0.78338	0.978153	-0.710255	0.174197	0.711282	0.985313	2.84652	0.174192	0.00112526	0.0389368	-1.61949	0.174197	0.274929	0.860058
ENSGALG00000013624	FAM65B	chr2	90153586	90209672	+	protein_coding	protein FAM65B [Source:RefSeq peptide;Acc:NP_001012883]	0.0371336	2.18317	0.811683	0.951045	-0.324828	2.18317	0.964373	1	-3.01172	2.18317	0.013133	0.0912473	-1.25681	2.18316	0.500198	0.915902	0.174877	2.18316	0.723055	0.988663	2.95934	2.18317	0.00110746	0.0385526	-3.13008	2.18316	0.0390836	0.372851
ENSGALG00000014976	GATA6	chr2	102302371	102315684	+	protein_coding	GATA binding protein 6 [Source:HGNC Symbol;Acc:HGNC:4174]	2.60598	2.20596	0.00699393	0.0795559	0.651049	2.20598	0.454894	0.806759	-2.15414	2.20596	0.0901204	0.323375	1.32203	2.20599	0.18367	0.670228	-3.76018	2.206	0.0484873	0.421196	-6.69877	2.20598	0.000613302	0.0267751	-3.39746	2.206	0.0459419	0.408175
ENSGALG00000014986		chr2	102542577	102546065	-	protein_coding	Uncharacterized protein [Source:UniProtKB/TrEMBL;Acc:E1C2E8]	-2.03634	-0.299478	0.0147606	0.123495	-2.0337	-0.299467	0.0151004	0.146956	-0.909932	-0.299477	0.242846	0.560389	-2.02389	-0.299461	0.0191166	0.216898	-0.838103	-0.299457	0.468734	0.950759	2.93945	-0.299469	5.15515e-06	0.000694657	0.269997	-0.299457	0.63242	0.973979
ENSGALG00000015169	MEP1B	chr2	106060413	106083857	+	protein_coding	meprin A, beta [Source:HGNC Symbol;Acc:HGNC:7020]	-2.85988	-0.097699	0.016642	0.133881	-2.85687	-0.0977135	0.0163042	0.153863	-3.00851	-0.0977004	0.000352088	0.00619091	-2.8463	-0.0977216	0.0196277	0.218825	1.54655	-0.0977269	0.0879506	0.574104	3.35422	-0.0977109	6.29642e-05	0.00538037	-2.89662	-0.0977261	0.00593913	0.126107
ENSGALG00000015198		chr2	106756439	106849498	-	protein_coding	Uncharacterized protein [Source:UniProtKB/TrEMBL;Acc:E1C508]	-0.840325	0.138292	0.616949	0.888156	-3.53947	0.138284	0.00411506	0.0693965	-2.87134	0.138291	0.0047178	0.0436981	1.1898	0.13828	0.181504	0.668188	-3.53829	0.138277	0.00471167	0.14905	3.17599	0.138286	0.000139114	0.00950994	-1.23571	0.138277	0.356029	0.907743
ENSGALG00000027669	NOL4	chr2	106892350	106913822	-	protein_coding	nucleolar protein 4 [Source:HGNC Symbol;Acc:HGNC:7870]	-3.45845	0.103969	0.00711207	0.0801839	-3.45497	0.103966	0.0069706	0.0911249	-3.61511	0.103968	7.34565e-05	0.00193137	1.4795	0.103964	0.112004	0.541851	-3.45386	0.103963	0.00788888	0.177171	3.74188	0.103966	8.18592e-06	0.00102426	-3.49736	0.103963	0.00210265	0.0701779
ENSGALG00000015254	ST18	chr2	109274972	109324045	-	protein_coding	suppression of tumorigenicity 18, zinc finger [Source:HGNC Symbol;Acc:HGNC:18695]	-6.59202	2.30374	0.000796477	0.0198256	-6.81475	2.30373	0.000312354	0.0148215	-2.77578	2.30374	0.0385424	0.19215	1.31643	2.30373	0.193711	0.684022	-6.45671	2.30373	0.00149392	0.0976854	4.03753	2.30373	1.78439e-05	0.00200052	-4.034	2.30373	0.0217896	0.259219
ENSGALG00000015820	CA13	chr2	122499872	122513695	+	protein_coding	carbonic anhydrase XIII [Source:HGNC Symbol;Acc:HGNC:14914]	0.0772162	-0.108373	0.814583	0.952726	-2.82294	-0.108386	0.00669075	0.0891366	0.0307615	-0.108374	0.890871	0.961714	-2.81243	-0.108394	0.00862029	0.142458	-2.82095	-0.108399	0.00762148	0.174522	3.11087	-0.108384	3.30666e-05	0.00326335	-2.47233	-0.108398	0.0142104	0.207352
ENSGALG00000016163	GPR20	chr2	145753410	145778152	-	protein_coding	G protein-coupled receptor 20 [Source:HGNC Symbol;Acc:HGNC:4475]	-3.32471	0.0399889	0.0112241	0.105623	-3.32074	0.0400515	0.0108994	0.122588	-1.58908	0.039995	0.168635	0.46257	-3.30885	0.0400864	0.0132222	0.179435	-3.32004	0.0401093	0.0122465	0.220594	5.25779	0.0400401	2.28146e-11	1.77624e-08	-3.36341	0.0401059	0.00365797	0.0980168
ENSGALG00000008359	CD93	chr3	3258573	3260939	+	protein_coding	complement component C1q receptor precursor [Source:RefSeq peptide;Acc:NP_001186380]	-2.21199	1.52312	0.184089	0.541548	3.26241	1.52313	0.00024315	0.0121841	-0.736437	1.52312	0.547998	0.803478	-0.51836	1.52314	0.870823	0.989901	0.000234073	1.52314	0.831271	0.99284	-5.86036	1.52313	0.000670927	0.0282265	-2.7832	1.52314	0.0625839	0.482493
ENSGALG00000018733		chr3	3296282	3297536	+	pseudogene		2.18381	1.18954	0.0101649	0.0991998	-1.10317	1.18954	0.478078	0.820126	-1.90662	1.18954	0.0670554	0.273014	0.731309	1.18954	0.377289	0.848962	1.19457	1.18954	0.168981	0.74605	-5.19025	1.18954	0.000797975	0.0319852	-2.56488	1.18954	0.0508082	0.430031
ENSGALG00000028576	PAX1	chr3	3418572	3422402	-	protein_coding	paired box 1 [Source:HGNC Symbol;Acc:HGNC:8615]	-3.13637	1.73169	0.0797201	0.341557	-1.18929	1.73168	0.538132	0.850617	-1.80915	1.73169	0.140255	0.420077	1.40323	1.73167	0.153495	0.62474	1.57383	1.73167	0.106248	0.624565	-6.11968	1.73168	0.00086967	0.0333906	1.11339	1.73167	0.22452	0.82002
ENSGALG00000008757	CNRIP1	chr3	11203131	11209021	-	protein_coding	CB1 cannabinoid receptor-interacting protein 1 [Source:RefSeq peptide;Acc:NP_001264459]	-2.13262	2.09422	0.244089	0.619237	-0.586547	2.09422	0.84557	0.970367	-1.55511	2.09422	0.217881	0.529825	0.384109	2.09422	0.596617	0.938383	-5.05044	2.09421	0.00988661	0.197366	3.38262	2.09422	0.000352983	0.0183211	-1.88338	2.09422	0.242698	0.836955
ENSGALG00000009042	ISM1	chr3	12067879	12108397	-	protein_coding	isthmin 1, angiogenesis inhibitor [Source:HGNC Symbol;Acc:HGNC:16213]	-5.73844	1.42267	0.00165894	0.0322446	-2.75434	1.42267	0.168905	0.530964	-5.77583	1.42267	1.7908e-05	0.000667454	-4.63251	1.42267	0.0244502	0.244903	-5.73411	1.42267	0.0018074	0.103189	5.21971	1.42267	1.06255e-08	3.72264e-06	-0.341079	1.42267	0.956709	1
ENSGALG00000001661	SLC22A7	chr3	15326574	15340830	+	protein_coding	solute carrier family 22 member 7 [Source:RefSeq peptide;Acc:NP_001186367]	-0.137617	-0.0402068	1	1	-0.208596	-0.0402042	1	1	-1.28634	-0.0402066	0.197898	0.504425	-0.460842	-0.0402028	0.877437	0.991617	-3.05131	-0.0402019	0.00909405	0.190785	3.0772	-0.0402047	0.000170621	0.0111925	-3.09357	-0.040202	0.00248205	0.0776417
ENSGALG00000027554	HLX	chr3	17936724	17938913	-	protein_coding	H2.0-like homeobox [Source:HGNC Symbol;Acc:HGNC:4978]	0.793553	1.58726	0.234219	0.607618	2.66385	1.58726	1.70319e-05	0.00192268	-2.39538	1.58726	0.00145528	0.0183237	-0.755041	1.58727	0.48519	0.908046	-0.116515	1.58727	1	1	-3.81657	1.58726	0.000665571	0.0282265	-1.37751	1.58727	0.126385	0.663483
ENSGALG00000010050	LRFN2	chr3	27585425	27734936	+	protein_coding	leucine rich repeat and fibronectin type III domain containing 2 [Source:HGNC Symbol;Acc:HGNC:21226]	-1.54613	1.67246	0.248255	0.626177	-1.10211	1.67244	0.432105	0.795106	1.62373	1.67246	0.0223161	0.132572	0.544345	1.67243	0.470275	0.897813	-0.558618	1.67243	0.738523	0.989366	-5.70608	1.67244	0.000181083	0.0115877	0.0576614	1.67243	0.829192	0.992118
ENSGALG00000025575	gga-mir-1784	chr3	34968393	34968495	+	miRNA	gga-mir-1784 [Source:miRBase;Acc:MI0007527]	2.01594	-0.246405	6.33846e-05	0.00298078	0.234127	-0.246412	0.624078	0.888353	-0.362326	-0.246406	0.5408	0.799786	-0.705259	-0.246416	0.399283	0.863132	-0.872673	-0.246419	0.256729	0.857782	-2.28157	-0.246411	0.000915391	0.0342287	-0.459472	-0.246418	0.559413	0.965682
ENSGALG00000011086	ACTA1	chr3	39337939	39339803	-	protein_coding	Actin, alpha skeletal muscle [Source:UniProtKB/Swiss-Prot;Acc:P68139]	3.28257	5.6096	1.80187e-27	8.41716e-24	1.07191	5.6096	0.00418425	0.0700574	-2.21297	5.6096	6.91304e-09	8.07327e-07	-2.57976	5.60961	1.59077e-06	0.000543732	-1.98783	5.60961	7.70266e-05	0.0220296	-2.71669	5.6096	3.99057e-07	8.22409e-05	-2.07764	5.60961	5.25061e-06	0.00432836
ENSGALG00000011117	AGT	chr3	39794447	39805046	-	protein_coding	angiotensinogen (serpin peptidase inhibitor, clade A, member 8) [Source:HGNC Symbol;Acc:HGNC:333]	-0.954302	0.624499	0.621706	0.889714	-4.53505	0.624486	0.0021614	0.0501487	0.269432	0.624497	0.686924	0.872736	-0.0973523	0.624479	1	1	-4.53445	0.624474	0.00247602	0.114019	3.0758	0.624488	0.000802127	0.0319852	-4.58004	0.624475	0.00049819	0.0403563
ENSGALG00000014014	LAMA2	chr3	57586334	57923906	-	protein_coding	laminin, alpha 2 [Source:HGNC Symbol;Acc:HGNC:6482]	-2.11607	2.06572	0.19131	0.551536	1.0868	2.06572	0.232335	0.619589	-1.25911	2.06572	0.27015	0.591266	-2.52239	2.06572	0.143782	0.606716	-4.9934	2.06572	0.00442983	0.144366	2.86593	2.06572	0.00138486	0.0444539	-0.778334	2.06572	0.626952	0.97282
ENSGALG00000014917	VGLL2	chr3	62989673	62997520	-	protein_coding	transcription cofactor vestigial-like protein 2 [Source:RefSeq peptide;Acc:NP_001139462]	-2.55711	3.23429	0.129231	0.449724	-3.19503	3.2343	0.066368	0.328395	-1.55358	3.23429	0.182479	0.481754	3.19895	3.2343	0.000410837	0.0298074	0.984247	3.23431	0.280163	0.876385	-7.84161	3.2343	4.72844e-05	0.00430297	-0.788557	3.23431	0.632159	0.973979
ENSGALG00000028539	TRAPPC3L	chr3	63251992	63273340	+	protein_coding	trafficking protein particle complex 3-like [Source:HGNC Symbol;Acc:HGNC:21090]	-1.56661	1.66261	0.000834529	0.0204818	-1.12246	1.6626	0.014922	0.146116	-1.73997	1.6626	1.06287e-06	6.44808e-05	0.0791038	1.6626	0.793339	0.980584	-1.87836	1.6626	5.6781e-05	0.0180848	3.21781	1.6626	8.54112e-31	5.98476e-27	-0.946393	1.6626	0.0210196	0.253939
ENSGALG00000026594	HS3ST5	chr3	64050590	64195525	+	protein_coding	heparan sulfate (glucosamine) 3-O-sulfotransferase 5 [Source:HGNC Symbol;Acc:HGNC:19419]	-2.01956	1.4953	0.302659	0.687818	-5.83069	1.4953	0.00122122	0.0372024	-2.88767	1.4953	0.0339522	0.175957	-5.81825	1.49531	0.00161809	0.0611819	-5.83048	1.49531	0.0013932	0.0950667	5.93608	1.4953	8.12769e-12	7.59343e-09	-2.7905	1.49531	0.101969	0.611177
ENSGALG00000016176	ADGRB3	chr3	82664538	83111962	-	protein_coding	adhesion G protein-coupled receptor B3 [Source:HGNC Symbol;Acc:HGNC:945]	-4.8259	0.792958	0.00119964	0.0262135	-2.53924	0.792958	0.127573	0.459362	0.151112	0.792958	0.78086	0.915384	0.414792	0.792957	0.574253	0.934253	-4.82146	0.792957	0.00137211	0.0947227	3.20019	0.792958	0.000371	0.0189061	-4.09799	0.792957	0.00490215	0.113178
ENSGALG00000027532	COLEC11	chr3	93337088	93359378	+	protein_coding	collectin-11 precursor [Source:RefSeq peptide;Acc:NP_001038130]	2.5702	2.94547	0.00465767	0.0619293	0.891979	2.94548	0.319699	0.714346	-3.46137	2.94547	0.00494895	0.0453892	0.211029	2.94548	0.696223	0.963156	-0.485221	2.94549	0.864106	0.996141	-7.12632	2.94548	0.000296786	0.0161835	-1.33137	2.94549	0.371884	0.911434
ENSGALG00000025971	KCNK3	chr3	104844800	104855646	-	protein_coding	TASK-1 potassium channel [Source:UniProtKB/TrEMBL;Acc:Q2XP57]	-4.51319	0.708997	7.76645e-05	0.00354525	-2.64071	0.708987	0.0248285	0.193782	-1.24771	0.708996	0.135252	0.411836	-0.287677	0.708981	0.901694	0.996007	0.19807	0.708977	0.707442	0.98509	2.50731	0.708989	0.00043592	0.0207789	0.283544	0.708978	0.638068	0.974019
ENSGALG00000026484	RUNX2	chr3	108988860	109073478	+	protein_coding	runt-related transcription factor 2 [Source:RefSeq peptide;Acc:NP_989459]	1.30163	1.79978	0.058189	0.284331	1.49499	1.79978	0.0297681	0.21198	-0.756261	1.79978	0.316098	0.63732	-0.727617	1.79978	0.524962	0.923011	-0.310349	1.79978	0.828183	0.991999	-4.17065	1.79978	0.000431903	0.0206576	-0.560566	1.79978	0.573492	0.965682
ENSGALG00000020329	FAM155B	chr4	1050845	1098893	+	protein_coding	family with sequence similarity 155, member B [Source:HGNC Symbol;Acc:HGNC:30701]	-1.78699	-0.343409	0.0277448	0.183618	-1.78471	-0.343405	0.0282207	0.20652	0.280438	-0.343409	0.606717	0.835201	-1.77566	-0.343403	0.0345837	0.297312	-1.1655	-0.343401	0.34931	0.911234	2.6708	-0.343406	4.19539e-05	0.0039996	-0.885677	-0.343402	0.351039	0.905363
ENSGALG00000004346	P2RY4	chr4	1201825	1206371	-	protein_coding	pyrimidinergic receptor P2Y, G-protein coupled, 4 [Source:HGNC Symbol;Acc:HGNC:8542]	-4.63594	0.89611	0.00310791	0.0480731	-1.12913	0.896126	0.506339	0.834613	2.81572	0.896111	0.000295435	0.00543337	-4.97926	0.896135	0.000826789	0.0437231	-1.03979	0.896141	0.550258	0.968556	-4.98316	0.896123	0.00137787	0.0443896	0.317674	0.89614	0.64109	0.974019
ENSGALG00000005747		chr4	2414190	2415740	+	protein_coding	Uncharacterized protein [Source:UniProtKB/TrEMBL;Acc:F1N8E5]	-2.74098	-0.134383	0.0119807	0.109465	-2.10558	-0.134384	0.0920253	0.385863	-2.65587	-0.134383	0.00189331	0.0223646	-2.72734	-0.134384	0.0147764	0.188317	-0.341657	-0.134385	0.921215	1	3.40556	-0.134384	1.09414e-05	0.00134503	0.333141	-0.134385	0.622545	0.972446
ENSGALG00000026243	POU4F3	chr4	11065971	11071035	+	protein_coding	Brain-specific homeobox/POU domain protein 3 [Source:UniProtKB/Swiss-Prot;Acc:Q91998]	-2.05179	0.382528	0.145629	0.479973	-1.86754	0.382531	0.196248	0.571651	-4.25454	0.382529	1.66904e-06	9.35385e-05	-0.961257	0.382533	0.55506	0.929413	-4.08786	0.382534	0.00117482	0.0897458	4.78187	0.382531	1.03097e-11	9.03004e-09	-1.84175	0.382534	0.146598	0.69902
ENSGALG00000007806	FGF16	chr4	12750300	12760703	+	protein_coding	fibroblast growth factor 16 [Source:RefSeq peptide;Acc:NP_001038115]	-2.83532	-0.119455	0.0132902	0.11597	-2.40127	-0.119391	0.0621981	0.316709	-1.56181	-0.119449	0.114962	0.374441	-2.81951	-0.119355	0.0160464	0.198302	-2.83059	-0.119332	0.0147678	0.241956	4.88238	-0.119403	1.87971e-12	1.88159e-09	-2.87234	-0.119335	0.00454681	0.109035
ENSGALG00000009395	GLRB	chr4	20823798	20857554	+	protein_coding	glycine receptor, beta [Source:HGNC Symbol;Acc:HGNC:4329]	-4.78997	1.11826	0.00448385	0.0607118	-1.59891	1.11826	0.35301	0.742578	-0.793211	1.11826	0.515232	0.782791	-2.64329	1.11826	0.134639	0.587542	-5.3138	1.11825	0.000679133	0.0726712	4.20057	1.11826	6.89766e-07	0.000128885	-1.42997	1.11825	0.340263	0.898013
ENSGALG00000009489	FSTL5	chr4	22250827	22516765	-	protein_coding	follistatin-like 5 [Source:HGNC Symbol;Acc:HGNC:21386]	-0.106914	0.379416	1	1	-2.70849	0.379397	0.090246	0.381528	-3.55645	0.379415	0.00134022	0.01709	-4.06095	0.379386	0.00431265	0.102633	0.937818	0.379379	0.300805	0.886986	3.0978	0.3794	0.000548331	0.0249081	-1.332	0.37938	0.375447	0.912191
ENSGALG00000010336		chr4	34432250	34433521	-	protein_coding	Uncharacterized protein [Source:UniProtKB/TrEMBL;Acc:E1C5J8]	-2.13353	-0.280683	0.0234673	0.164315	-2.13074	-0.280674	0.0235469	0.18911	-0.854692	-0.280682	0.324255	0.643912	-2.12083	-0.280669	0.0286535	0.269356	1.17133	-0.280665	0.13568	0.681706	2.75354	-0.280676	0.000208698	0.0126064	-1.98277	-0.280666	0.0283936	0.307264
ENSGALG00000010408	OPN4-1	chr4	36677893	36705928	+	protein_coding	putative photopigment melanopsin [Source:RefSeq peptide;Acc:NP_989956]	-5.36771	1.14928	0.00111306	0.025281	-4.80701	1.14929	0.00757042	0.0960108	-1.86363	1.14928	0.13502	0.411457	0.108725	1.14929	0.751379	0.974676	-5.36334	1.1493	0.00125245	0.0926633	3.91874	1.14929	1.65796e-05	0.00188899	-0.533705	1.1493	0.815142	0.988467
ENSGALG00000010662		chr4	39326001	39326654	+	protein_coding	Claudin [Source:UniProtKB/TrEMBL;Acc:F1NSR2]	-1.27794	-0.41609	0.0936523	0.375628	-1.27633	-0.41609	0.0947407	0.391651	-1.08133	-0.41609	0.0689951	0.277207	-1.26904	-0.416089	0.109691	0.537188	-1.27391	-0.416089	0.102044	0.612964	3.37556	-0.41609	5.92698e-14	8.30606e-11	-1.30264	-0.416089	0.0491673	0.422459
ENSGALG00000020199	GPM6A	chr4	43565210	43666838	-	protein_coding	neuronal membrane glycoprotein M6-a [Source:RefSeq peptide;Acc:NP_001012597]	-5.70491	2.80632	0.00221308	0.0387677	-7.1801	2.80632	8.19748e-05	0.00589125	-1.14247	2.80632	0.327035	0.64684	0.389717	2.80632	0.589496	0.935822	-2.61227	2.80632	0.126324	0.665279	3.85572	2.80632	8.13531e-06	0.00102426	-2.08939	2.80632	0.157711	0.721217
ENSGALG00000026560	PRDM8	chr4	44734247	44737047	+	protein_coding	PR domain containing 8 [Source:HGNC Symbol;Acc:HGNC:13993]	-1.06284	-0.0370347	0.431457	0.790115	0.388002	-0.0370251	0.56872	0.865389	-2.33184	-0.0370338	0.00846573	0.0667682	0.674676	-0.0370197	0.379002	0.849677	-3.06462	-0.0370162	0.00403411	0.13973	2.50464	-0.0370268	0.00128888	0.0423006	-0.904705	-0.0370167	0.461297	0.944836
ENSGALG00000012018	CGT	chr4	55856553	55899875	-	protein_coding	2-hydroxyacylsphingosine 1-beta-galactosyltransferase precursor [Source:RefSeq peptide;Acc:NP_989535]	-1.53276	2.48836	0.368183	0.74444	-2.7549	2.48835	0.109162	0.424614	-0.819606	2.48836	0.499055	0.774865	-3.01957	2.48835	0.094514	0.49852	-6.42288	2.48834	0.000514152	0.0645105	3.33819	2.48835	0.000190743	0.0120409	0.352427	2.48835	0.617941	0.972446
ENSGALG00000000593		chr4	59773727	59776299	+	protein_coding	Uncharacterized protein [Source:UniProtKB/TrEMBL;Acc:F1NJ34]	-1.7496	-0.348514	0.0459031	0.24647	-0.0362834	-0.348522	1	1	-1.87165	-0.348515	0.00205629	0.0237371	-1.73946	-0.348527	0.0546106	0.378384	-1.74504	-0.34853	0.050578	0.433173	2.3378	-0.348521	0.00110866	0.0385526	1.00661	-0.34853	0.154607	0.713891
ENSGALG00000026794	KIAA1456	chr4	64216397	64317827	-	protein_coding	KIAA1456 [Source:HGNC Symbol;Acc:HGNC:26725]	-4.13217	1.14035	0.0152256	0.126106	0.259446	1.14036	0.671279	0.910421	1.3909	1.14035	0.0952122	0.334161	0.38153	1.14036	0.595936	0.937943	0.825221	1.14036	0.352699	0.911829	-5.34202	1.14036	0.00137002	0.0443406	-1.63709	1.14036	0.269861	0.859557
ENSGALG00000014080	CWH43	chr4	65834288	65859538	-	protein_coding	cell wall biogenesis 43 C-terminal homolog (S. cerevisiae) [Source:HGNC Symbol;Acc:HGNC:26133]	-0.0273554	0.602782	1	1	-0.853747	0.602767	0.153071	0.50581	0.244065	0.60278	0.50389	0.776738	-1.5488	0.602758	0.0122422	0.170879	2.38256	0.602752	6.33882e-10	2.4817e-06	-2.34395	0.602769	0.000180964	0.0115877	-2.07877	0.602753	9.19779e-05	0.02046
ENSGALG00000014144	CORIN	chr4	66262035	66367775	+	protein_coding	corin, serine peptidase [Source:HGNC Symbol;Acc:HGNC:19012]	-3.75482	0.225881	0.00574205	0.069798	-3.75118	0.22588	0.00560241	0.0804427	-3.65705	0.225881	0.000809495	0.011655	0.678647	0.225879	0.42895	0.879706	-0.146432	0.225879	1	1	3.75296	0.22588	1.40968e-05	0.0016601	-3.79453	0.225879	0.00161191	0.0624515
ENSGALG00000018557	SOD3	chr4	73280251	73281120	-	protein_coding	superoxide dismutase 3, extracellular [Source:HGNC Symbol;Acc:HGNC:11181]	2.1008	1.16488	0.0131041	0.115009	1.54294	1.16488	0.0745836	0.347699	-1.50538	1.16488	0.142572	0.423218	-1.08431	1.16487	0.504108	0.917446	-0.543318	1.16487	0.781498	0.991713	-5.15149	1.16488	0.000747997	0.0303838	-1.2863	1.16487	0.324981	0.890118
ENSGALG00000014516	CPEB2	chr4	76407832	76456077	-	protein_coding	cytoplasmic polyadenylation element binding protein 2 [Source:HGNC Symbol;Acc:HGNC:21745]	0.430198	1.16112	0.561632	0.86162	1.10986	1.16117	0.22251	0.607353	-5.24258	1.16112	5.49708e-06	0.000256787	-2.27135	1.16119	0.180571	0.667448	-1.37307	1.16121	0.410044	0.930078	2.88861	1.16116	0.00118163	0.0399984	-4.76185	1.16121	0.000938602	0.0520934
ENSGALG00000014975	DRD5	chr4	78070698	78072104	-	protein_coding	dopamine receptor D5 [Source:HGNC Symbol;Acc:HGNC:3026]	-0.471883	0.838361	0.816574	0.953783	0.338204	0.83838	0.614108	0.883989	-1.80841	0.838363	0.0665705	0.272218	0.329326	0.83839	0.615036	0.943836	-0.366223	0.838397	0.8904	0.998615	-4.89264	0.838377	0.000379129	0.0192504	2.01329	0.838396	0.010943	0.17789
ENSGALG00000015531	PPP2R2C	chr4	79113279	79195376	-	protein_coding	protein phosphatase 2, regulatory subunit B, gamma [Source:HGNC Symbol;Acc:HGNC:9306]	-6.72792	2.22561	0.00032589	0.010263	-6.72375	2.22561	0.000323197	0.015121	-2.48287	2.22561	0.060052	0.255718	-0.633765	2.22561	0.849123	0.987672	-2.34205	2.2256	0.22144	0.819668	5.03214	2.22561	1.7029e-08	5.42375e-06	-3.00638	2.22561	0.0745385	0.525444
ENSGALG00000025762	uc_338	chr4	79218947	79219119	-	misc_RNA	TUC338 [Source:RFAM;Acc:RF02271]	-1.46398	-0.391957	0.0612078	0.291956	-1.4622	-0.391957	0.0620598	0.316204	-1.08645	-0.391957	0.109526	0.364298	-0.158019	-0.391957	1	1	-1.45965	-0.391957	0.0674806	0.503197	3.21166	-0.391957	3.43823e-09	1.33843e-06	-1.49078	-0.391957	0.0293656	0.31295
ENSGALG00000015599	SOHO-1	chr4	80966340	80969431	-	protein_coding	sensory organ homeobox protein SOHo [Source:RefSeq peptide;Acc:NP_990717]	-1.07401	4.38398	0.413248	0.778082	-2.59717	4.38398	0.0519391	0.288382	-0.665103	4.38398	0.480817	0.762955	-1.14467	4.38398	0.408673	0.868584	-4.91988	4.38398	0.000895116	0.0824831	3.17784	4.38398	2.03876e-05	0.00221482	-0.171371	4.38398	0.970338	1
ENSGALG00000015600	HMX1	chr4	80975027	80978215	-	protein_coding	Homeobox protein HMX1 [Source:UniProtKB/Swiss-Prot;Acc:Q9DE09]	-2.06906	-0.0672833	0.0418052	0.231839	-1.55736	-0.0672931	0.134619	0.473952	0.0675766	-0.0672843	0.862246	0.949215	-1.58204	-0.0672986	0.138396	0.594751	-2.96109	-0.0673022	0.00127379	0.0926874	3.21658	-0.0672913	2.58629e-07	5.84585e-05	-1.48011	-0.0673017	0.104112	0.615463
ENSGALG00000028936		chr5	188165	199244	+	protein_coding	Aldehyde dehydrogenase [Source:UniProtKB/TrEMBL;Acc:R4GM83]	-0.208617	1.36201	0.971017	1	-0.172257	1.36199	1	1	-0.338446	1.36201	0.749633	0.901298	-0.508525	1.36199	0.767912	0.975659	1.20722	1.36198	0.127878	0.668362	-4.5172	1.362	0.00105997	0.0374295	0.821885	1.36198	0.266847	0.858759
ENSGALG00000004267	SIGIRR	chr5	1555415	1560214	+	protein_coding	single Ig IL-1-related receptor [Source:RefSeq peptide;Acc:NP_001186471]	2.98829	1.96272	0.00157746	0.031268	-0.290641	1.96271	1	1	0.146731	1.96272	0.784206	0.916407	-6.17939	1.9627	0.00116968	0.0520235	-2.27336	1.9627	0.215065	0.813214	-6.40266	1.96271	0.000798958	0.0319852	-1.10029	1.9627	0.514706	0.956573
ENSGALG00000026970		chr5	1592827	1594156	+	protein_coding	Uncharacterized protein [Source:UniProtKB/TrEMBL;Acc:R4GJX3]	-0.533577	5.07794	0.187994	0.546699	0.883694	5.07794	0.00814946	0.101068	0.13548	5.07794	0.615654	0.839196	-1.04297	5.07794	0.0144715	0.187333	0.445124	5.07794	0.190451	0.779083	-2.61993	5.07794	1.19906e-08	4.09843e-06	0.520189	5.07794	0.100084	0.607501
ENSGALG00000005903	NRIP3	chr5	8974291	8985981	+	protein_coding	nuclear receptor interacting protein 3 [Source:HGNC Symbol;Acc:HGNC:1167]	-1.97633	-0.124665	0.0494631	0.257782	-2.54686	-0.124658	0.0083974	0.103048	-2.52744	-0.124664	0.000363815	0.00637313	-2.1552	-0.124655	0.0438035	0.333542	-2.06287	-0.124653	0.0544938	0.450546	4.70394	-0.12466	5.69572e-23	1.99549e-19	-1.86006	-0.124653	0.0406566	0.380094
ENSGALG00000006054	CALCA	chr5	9980460	9984994	+	protein_coding	calcitonin gene-related peptide isoform 3 preproprotein [Source:RefSeq peptide;Acc:NP_001258895]	-1.83134	3.27053	0.212421	0.58012	-2.56441	3.27053	0.0887453	0.378773	-2.59571	3.27053	0.015668	0.102555	-6.83752	3.27052	0.000128684	0.0145586	-5.95271	3.27052	0.000452713	0.0604221	3.83781	3.27053	1.13881e-06	0.000189992	0.662602	3.27052	0.397932	0.925809
ENSGALG00000006572	TNNT3	chr5	13389730	13416288	-	protein_coding	Gallus gallus troponin T type 3 (skeletal, fast) (TNNT3), mRNA. [Source:RefSeq mRNA;Acc:NM_204922]	-5.38636	1.16319	0.000759572	0.0193539	-5.3823	1.1632	0.000747387	0.0271904	-0.474362	1.16319	0.740882	0.899248	-3.15132	1.1632	0.0842939	0.470062	-5.38198	1.16321	0.000868947	0.082391	4.61784	1.1632	5.03792e-08	1.35772e-05	-2.63405	1.16321	0.0976779	0.600712
ENSGALG00000006591	TNNI2	chr5	13473898	13476632	-	protein_coding	Gallus gallus troponin I type 2 (skeletal, fast) (TNNI2), mRNA. [Source:RefSeq mRNA;Acc:NM_205417]	1.75368	0.282538	0.0590102	0.286119	-1.397	0.282543	0.419366	0.786379	-4.04445	0.282539	2.90294e-05	0.000964025	-3.86843	0.282546	0.00536098	0.113831	-3.87934	0.282547	0.00480339	0.149921	3.02131	0.282542	0.000733163	0.0299549	-1.72367	0.282547	0.220646	0.815866
ENSGALG00000006717		chr5	14243984	14284324	-	protein_coding	Uncharacterized protein [Source:UniProtKB/TrEMBL;Acc:F1NZY2]	-4.21298	0.44417	0.00278833	0.0449447	-3.96616	0.44417	0.0073521	0.0942656	-3.0416	0.44417	0.00743064	0.0612187	-3.95761	0.44417	0.00958874	0.150256	-0.410383	0.44417	0.917645	1	5.0689	0.44417	1.41671e-10	9.45417e-08	-3.12107	0.44417	0.0254445	0.287795
ENSGALG00000028582	LMO2	chr5	17708714	17717820	-	protein_coding	Gallus gallus LIM domain only 2 (rhombotin-like 1) (LMO2), mRNA. [Source:RefSeq mRNA;Acc:NM_204271]	1.42177	4.85137	0.0204303	0.150892	1.95935	4.85137	0.00106382	0.0343511	-0.588401	4.85137	0.371485	0.681864	-0.76121	4.85136	0.422081	0.87728	-0.690908	4.85136	0.451859	0.944964	-3.42711	4.85137	0.000725753	0.0297389	-2.72495	4.85136	0.00143182	0.061098
ENSGALG00000023393		chr5	18304373	18308342	+	protein_coding	Uncharacterized protein [Source:UniProtKB/TrEMBL;Acc:E1BSE9]	-0.966536	0.556445	0.429994	0.78969	-0.785358	0.556447	0.552681	0.858685	-0.464497	0.556445	0.621006	0.842138	-1.4609	0.556448	0.244824	0.746738	-4.4194	0.556449	8.58442e-05	0.0235886	2.85914	0.556447	6.73596e-05	0.00552034	-0.345942	0.556449	0.816328	0.989013
ENSGALG00000008047		chr5	21499950	21518541	+	protein_coding	Uncharacterized protein [Source:UniProtKB/TrEMBL;Acc:E1C2B3]	-1.83786	-0.335025	0.0402229	0.226093	-1.32513	-0.33502	0.190773	0.564584	-1.9638	-0.335025	0.00161732	0.0197216	-1.59948	-0.335018	0.126409	0.570859	-1.83333	-0.335016	0.0444816	0.401912	3.32708	-0.335021	4.86454e-07	9.46828e-05	0.233783	-0.335016	0.697385	0.979226
ENSGALG00000028047	RHOV	chr5	23569204	23575558	-	protein_coding	ras homolog family member V [Source:HGNC Symbol;Acc:HGNC:18313]	-4.09375	1.25407	0.0183283	0.141595	-0.976166	1.25405	0.617855	0.885485	1.49198	1.25406	0.0754607	0.291324	0.879283	1.25404	0.334864	0.824163	-0.705804	1.25403	0.751994	0.989688	-5.49294	1.25405	0.00126961	0.0418747	0.359321	1.25403	0.615365	0.971926
ENSGALG00000009562	PLEK2	chr5	28222462	28230939	-	protein_coding	pleckstrin-2 [Source:RefSeq peptide;Acc:NP_001264366]	-0.95229	2.26201	0.651095	0.90048	-2.11437	2.26201	0.254099	0.647656	3.97948	2.26201	1.78578e-06	9.79277e-05	-0.948521	2.26201	0.681552	0.9583	-4.51794	2.26201	0.0201261	0.273567	-6.75953	2.26201	0.000568623	0.025378	-6.19104	2.26201	0.000376328	0.0368951
ENSGALG00000009740	RASGRP1	chr5	29940334	29974856	+	protein_coding	RAS guanyl releasing protein 1 (calcium and DAG-regulated) [Source:HGNC Symbol;Acc:HGNC:9878]	1.52229	4.50853	0.00375376	0.0543196	1.19275	4.50853	0.0268748	0.201726	-0.417035	4.50853	0.452066	0.743923	-0.607809	4.50853	0.437035	0.883527	-0.161541	4.50854	0.885214	0.998615	-3.10964	4.50853	0.000194286	0.0121755	-1.40542	4.50854	0.0361914	0.357568
ENSGALG00000010113		chr5	35995651	35997070	-	protein_coding	Uncharacterized protein [Source:UniProtKB/TrEMBL;Acc:F1NB11]	-0.47827	1.66816	0.754374	0.935203	-0.828662	1.66817	0.531395	0.848794	-0.857331	1.66816	0.336894	0.652284	2.16052	1.66817	0.00499177	0.109991	0.409833	1.66817	0.54736	0.968186	-5.2506	1.66817	0.000240608	0.0141676	-0.0373071	1.66817	1	1
ENSGALG00000010233	SYNDIG1L	chr5	37167461	37170933	-	protein_coding	synapse differentiation inducing 1-like [Source:HGNC Symbol;Acc:HGNC:32388]	-4.84826	0.807782	0.000527941	0.0145928	-0.716552	0.807777	0.709923	0.92338	-1.95624	0.807781	0.0699592	0.279398	-0.466984	0.807774	0.8726	0.989901	-4.84378	0.807772	0.00062862	0.0701646	3.51499	0.807778	2.30133e-05	0.00248084	-0.169503	0.807773	1	1
ENSGALG00000010456		chr5	38465526	38472972	-	protein_coding	Uncharacterized protein [Source:UniProtKB/TrEMBL;Acc:E1C128]	-4.33385	0.498856	0.00186972	0.0345341	-2.30348	0.498896	0.144046	0.490303	0.32904	0.49886	0.636823	0.849875	-0.671593	0.498919	0.781447	0.977787	-0.764698	0.498934	0.696303	0.98509	3.0502	0.498889	0.000580328	0.025805	-4.37474	0.498931	0.000410694	0.0381717
ENSGALG00000010598	KCNK10	chr5	42240385	42272204	-	protein_coding	potassium channel, two pore domain subfamily K, member 10 [Source:HGNC Symbol;Acc:HGNC:6273]	-2.502	2.62301	0.119433	0.430989	-1.71913	2.62301	0.290082	0.689636	-1.84058	2.62301	0.101178	0.347017	0.266713	2.623	0.662706	0.954445	-1.71408	2.623	0.290486	0.88259	2.90014	2.62301	0.00102174	0.036592	0.165104	2.623	0.7444	0.984339
ENSGALG00000010747	FBLN5	chr5	43740994	43781814	-	protein_coding	fibulin-5 precursor [Source:RefSeq peptide;Acc:NP_001264403]	2.13751	1.28812	0.0252295	0.17237	-0.747545	1.28809	0.743352	0.935832	-2.49635	1.28812	0.042744	0.205856	2.70576	1.28808	0.00467847	0.106814	-5.27687	1.28807	0.00188156	0.104138	-5.53711	1.2881	0.00156782	0.0488254	-5.59189	1.28807	0.00010962	0.0225913
ENSGALG00000010820	CHGA	chr5	44155021	44165632	+	protein_coding	chromogranin A [Source:HGNC Symbol;Acc:HGNC:1929]	-4.33476	5.76177	0.00591266	0.0710754	-2.38176	5.76177	0.104539	0.415724	-4.0882	5.76177	0.000294284	0.00542644	-0.427542	5.76177	0.863497	0.989699	-3.97867	5.76177	0.0111979	0.209236	4.62066	5.76177	7.23201e-10	3.37831e-07	-1.11906	5.76177	0.384901	0.917806
ENSGALG00000011690	C14orf79	chr5	51829755	51839632	+	protein_coding	chromosome 14 open reading frame 79 [Source:HGNC Symbol;Acc:HGNC:20126]	0.308911	1.64628	0.638574	0.896536	1.06133	1.64629	0.237255	0.626866	-0.225107	1.64628	0.905848	0.967084	0.864728	1.6463	0.328074	0.820866	-0.777737	1.64631	0.67865	0.984229	-6.02052	1.64629	0.000282434	0.0155828	-0.18523	1.64631	1	1
ENSGALG00000011889	PRKCH	chr5	53951087	54056201	-	protein_coding	protein kinase C, eta [Source:HGNC Symbol;Acc:HGNC:9403]	0.22095	1.62255	0.694864	0.916999	2.7275	1.62253	0.00137992	0.0393123	-1.47228	1.62255	0.167934	0.461819	-0.864332	1.62252	0.639881	0.94997	0.357179	1.62251	0.604114	0.976743	-5.75712	1.62253	0.000489409	0.0224871	-2.04382	1.62251	0.128794	0.66824
ENSGALG00000012006	RTN1	chr5	54592267	54688712	+	protein_coding	reticulon-1 [Source:RefSeq peptide;Acc:NP_001001466]	-0.310597	2.98901	0.862884	0.967319	-3.11427	2.98902	0.0119648	0.128645	-0.307132	2.98901	0.750173	0.901298	-0.844127	2.98902	0.510518	0.919545	-1.19762	2.98902	0.310541	0.889164	2.36318	2.98902	0.00113392	0.0391243	-0.121947	2.98902	0.997234	1
ENSGALG00000020349		chr5	56597162	56696125	+	protein_coding	Uncharacterized protein [Source:UniProtKB/TrEMBL;Acc:F1NM20]	-1.52492	0.138467	0.181457	0.537489	-3.37419	0.138503	0.00201437	0.0482553	-0.25723	0.138471	0.814973	0.931113	-1.80594	0.138523	0.14799	0.614683	-0.603192	0.138536	0.742615	0.989366	3.45136	0.138496	4.15523e-07	8.43934e-05	-3.15882	0.138534	0.00099435	0.0525842
ENSGALG00000001854		chr6	383920	392143	-	protein_coding	Uncharacterized protein [Source:UniProtKB/TrEMBL;Acc:F1NFP4]	-0.818204	4.64619	0.501702	0.831143	0.563614	4.64619	0.426062	0.790915	-1.28727	4.64619	0.127385	0.398475	-1.19412	4.64619	0.335884	0.824501	-2.45575	4.64619	0.0433771	0.397465	3.03849	4.64619	1.4397e-05	0.00168133	-2.61955	4.64619	0.0166592	0.22223
ENSGALG00000002015	SNCG1	chr6	2108594	2115926	+	protein_coding	synuclein, gamma [Source:RefSeq peptide;Acc:NP_990003]	-0.698276	1.39649	0.697221	0.918054	0.592052	1.39649	0.45798	0.809144	-2.12768	1.39649	0.0462719	0.217602	-1.03302	1.3965	0.545556	0.929017	-3.71253	1.3965	0.024725	0.297677	3.36799	1.39649	4.11847e-05	0.00395317	-3.55647	1.3965	0.00994792	0.169599
ENSGALG00000002289	CHAT	chr6	2419280	2450518	-	protein_coding	choline O-acetyltransferase [Source:RefSeq peptide;Acc:NP_989941]	1.24175	1.38149	0.152175	0.491493	-1.11764	1.38151	0.473384	0.81728	0.535469	1.38149	0.462405	0.751198	-0.287919	1.38152	0.97262	1	-0.76321	1.38152	0.654454	0.981678	-5.67743	1.3815	0.000195234	0.0121755	0.473607	1.38152	0.520328	0.958033
ENSGALG00000002395		chr6	3804945	3821253	+	protein_coding	Uncharacterized protein [Source:UniProtKB/TrEMBL;Acc:F1NZ58]	1.44719	0.112217	0.0533084	0.270103	-1.37587	0.112208	0.258451	0.65366	1.37537	0.112216	0.0335347	0.174704	-2.06998	0.112204	0.084603	0.470553	-0.165905	0.112201	1	1	-3.46612	0.11221	0.00117117	0.0399364	-1.23365	0.112201	0.239569	0.834087
ENSGALG00000024315		chr6	5484368	5485399	-	protein_coding	Uncharacterized protein [Source:UniProtKB/TrEMBL;Acc:E1BQY1]	-1.61623	0.30607	0.207925	0.574386	2.99642	0.306097	6.41928e-05	0.00497015	0.262774	0.306072	0.666789	0.864333	-0.306217	0.306112	0.929191	1	-3.04651	0.306122	0.0159683	0.248093	-3.93176	0.306092	0.00109574	0.0385526	-2.27455	0.30612	0.046162	0.408422
ENSGALG00000002845	CTNNA3	chr6	6129271	6562977	+	protein_coding	catenin alpha-3 [Source:RefSeq peptide;Acc:NP_001186465]	2.78858	2.43765	0.000499365	0.0141376	1.35192	2.43772	0.111626	0.429908	-2.91334	2.43766	0.00545912	0.0487287	-0.390514	2.43776	0.88338	0.993091	-0.811521	2.43779	0.603391	0.976743	-6.73749	2.43771	3.44819e-05	0.00337923	-3.15879	2.43778	0.0156128	0.214768
ENSGALG00000005422	PDLIM1	chr6	16000513	16037097	+	protein_coding	PDZ and LIM domain 1 [Source:HGNC Symbol;Acc:HGNC:2067]	0.919769	5.53923	0.0523573	0.267007	1.03304	5.53923	0.0297352	0.211958	-0.0610296	5.53923	0.930959	0.978142	-0.044654	5.53923	0.984931	1	-0.881308	5.53924	0.159144	0.727695	-2.41836	5.53923	0.00042689	0.0206291	-0.38579	5.53923	0.504019	0.954801
ENSGALG00000006165	WDFY4	chr6	17984757	18098872	+	protein_coding	WDFY family member 4 [Source:HGNC Symbol;Acc:HGNC:29323]	-2.26948	-0.251827	0.0296955	0.191952	-2.26664	-0.251821	0.0293853	0.211036	-2.4073	-0.251826	0.000978595	0.0134981	0.00917968	-0.251818	1	1	-2.26486	-0.251816	0.0325707	0.345548	4.1168	-0.251822	4.88691e-09	1.85095e-06	-2.30318	-0.251816	0.0121039	0.187682
ENSGALG00000026017	Drg11	chr6	18233411	18252163	-	protein_coding	Uncharacterized protein [Source:UniProtKB/TrEMBL;Acc:R4GG90]	-4.23631	0.602369	0.00809358	0.0865833	-4.49663	0.602357	0.0032151	0.0613971	-4.66475	0.602368	1.83447e-05	0.000676533	2.0156	0.602351	0.0424599	0.33015	-3.33611	0.602347	0.0537302	0.44687	3.21108	0.602359	0.000623476	0.0268774	-1.84095	0.602348	0.232588	0.826929
ENSGALG00000006352	CH25H	chr6	18874848	18875672	-	protein_coding	cholesterol 25-hydroxylase [Source:RefSeq peptide;Acc:NP_001264283]	0.339484	0.502314	0.607593	0.885337	1.73843	0.502288	0.0391215	0.245291	-1.63877	0.502312	0.0951239	0.334018	-0.982308	0.502274	0.534642	0.925302	1.21822	0.502264	0.149993	0.709656	-4.30125	0.502293	0.00112023	0.0388585	-0.562191	0.502266	0.702881	0.979226
ENSGALG00000007055		chr6	21486151	21531654	-	protein_coding	Uncharacterized protein [Source:UniProtKB/TrEMBL;Acc:E1C7Q7]	-6.70894	2.19293	0.000130805	0.00535293	1.75948	2.19299	0.0689575	0.335312	0.174051	2.19294	0.764418	0.90765	0.636234	2.19303	0.459622	0.895565	-0.617598	2.19305	0.812568	0.991713	-6.69643	2.19298	0.00036557	0.0188349	0.0958793	2.19305	0.786544	0.988222
ENSGALG00000020753		chr6	21669881	21670765	+	protein_coding	Uncharacterized protein [Source:UniProtKB/TrEMBL;Acc:F1P347]	1.24563	0.693362	0.145621	0.479973	2.51619	0.693344	0.00253716	0.0547252	-0.851022	0.693361	0.415775	0.716102	-4.63965	0.693334	0.000556576	0.0347633	-0.976258	0.693327	0.531696	0.967773	-4.64296	0.693347	0.000876517	0.0335186	-1.27413	0.693328	0.326163	0.890428
ENSGALG00000013090	LOXL4	chr6	21800170	21804682	+	protein_coding	lysyl oxidase-like 4 [Source:HGNC Symbol;Acc:HGNC:17171]	-0.489754	1.30145	0.846105	0.961818	3.15527	1.30145	0.000244309	0.0121841	-0.428813	1.30145	0.742456	0.899764	-0.656753	1.30146	0.771259	0.976593	-1.16011	1.30146	0.499616	0.958922	-5.56527	1.30145	0.000557447	0.0251107	-2.99721	1.30146	0.0356068	0.355365
ENSGALG00000007515	SFRP5	chr6	21837263	21839051	+	protein_coding	secreted frizzled-related protein 5 [Source:HGNC Symbol;Acc:HGNC:10779]	-3.51154	0.12605	0.00492083	0.0639116	1.19939	0.126041	0.175468	0.540561	-2.03326	0.126049	0.0483979	0.223039	-0.474599	0.126036	0.886193	0.993187	-0.982314	0.126032	0.565642	0.968906	2.86288	0.126042	0.000880179	0.0335186	-3.55056	0.126033	0.0013475	0.0601398
ENSGALG00000007706	FGF8	chr6	22253323	22259681	+	protein_coding	fibroblast growth factor 8 precursor [Source:RefSeq peptide;Acc:NP_001012785]	0.414875	2.79921	0.56402	0.862321	-4.36039	2.79921	0.0065015	0.087692	-0.698774	2.79921	0.515347	0.78288	2.08426	2.79921	0.0170471	0.204712	0.392836	2.79921	0.577598	0.971291	-5.58795	2.79921	0.00126451	0.0418747	-0.0293373	2.79921	0.89457	0.995278
ENSGALG00000007837	KAZALD1	chr6	22598417	22602875	-	protein_coding	Kazal-type serine peptidase inhibitor domain 1 [Source:HGNC Symbol;Acc:HGNC:25460]	0.413081	5.9687	0.396278	0.764284	2.4296	5.9687	8.22354e-08	2.8847e-05	-1.35062	5.9687	0.00753127	0.0617934	0.164229	5.9687	0.699554	0.964536	-0.373612	5.96869	0.596178	0.974994	-2.41902	5.9687	0.000919076	0.0342287	-2.12574	5.96869	0.000781383	0.0478179
ENSGALG00000023414	HMX2	chr6	31018104	31023370	+	protein_coding	H6 family homeobox 2 [Source:HGNC Symbol;Acc:HGNC:5018]	-2.39015	-0.0728676	0.054996	0.274568	-2.94397	-0.0728758	0.00644848	0.0872525	-1.0528	-0.0728684	0.273772	0.595751	-1.02164	-0.0728804	0.493457	0.91279	-2.94222	-0.0728834	0.00736164	0.171372	3.62704	-0.0728743	8.80254e-07	0.00015615	-0.423374	-0.072883	0.810732	0.988392
ENSGALG00000010500	Nkx-6.2	chr6	34788047	34790162	-	protein_coding	homeobox protein Nkx-6.2 [Source:RefSeq peptide;Acc:NP_001186477]	-0.274714	2.15035	1	1	-1.92097	2.15034	0.34794	0.737718	-6.0368	2.15035	5.02391e-05	0.0014646	4.50207	2.15034	2.61707e-06	0.000814394	-2.56926	2.15034	0.202804	0.795571	-6.62655	2.15035	0.00160526	0.0492764	-1.2212	2.15034	0.50775	0.955982
ENSGALG00000008896	PPP1R1C	chr7	13606939	13647794	-	protein_coding	protein phosphatase 1, regulatory (inhibitor) subunit 1C [Source:HGNC Symbol;Acc:HGNC:14940]	-3.13112	1.87064	0.0530077	0.269149	-6.30178	1.87063	7.10983e-05	0.00535684	-0.717851	1.87064	0.538048	0.798568	-3.94524	1.87063	0.0227791	0.235244	-1.72118	1.87063	0.284998	0.880503	4.39619	1.87063	4.59066e-08	1.26144e-05	-2.25001	1.87063	0.110629	0.627676
ENSGALG00000008908	NEUROD1	chr7	13758808	13759956	+	protein_coding	neurogenic differentiation factor 1 [Source:RefSeq peptide;Acc:NP_990251]	-7.25353	2.90156	0.000420354	0.0124806	-7.30547	2.90155	0.000427466	0.0184323	-6.5135	2.90156	1.91345e-05	0.000696813	-0.142531	2.90155	1	1	-6.75681	2.90155	0.00199601	0.104374	3.86304	2.90155	5.62358e-05	0.00486474	0.614625	2.90155	0.476692	0.950343
ENSGALG00000026366		chr7	14695977	14885623	+	protein_coding	Uncharacterized protein [Source:UniProtKB/TrEMBL;Acc:R4GLP6]	5.32899	4.81526	2.02979e-13	9.17596e-11	-2.62911	4.81527	0.0815254	0.363184	-1.69584	4.81526	0.102655	0.35035	-2.59487	4.81527	0.0983922	0.508245	-5.16094	4.81528	0.00213289	0.107134	-5.71297	4.81527	0.00120342	0.0404154	-4.11761	4.81528	0.00397969	0.102424
ENSGALG00000023439	DFNB59	chr7	14909332	14917988	-	protein_coding	deafness, autosomal recessive 59 [Source:HGNC Symbol;Acc:HGNC:29502]	-2.36586	-0.12519	0.0529434	0.269017	-0.620016	-0.125197	0.721793	0.926981	-2.91786	-0.125191	0.000143092	0.00325535	1.414	-0.1252	0.100012	0.511167	-2.7657	-0.125203	0.0118443	0.216128	3.07858	-0.125195	9.48609e-05	0.00702151	-2.80674	-0.125202	0.00343079	0.0940883
ENSGALG00000019647		chr7	16438071	16439295	-	pseudogene		-1.00666	-0.289062	0.269774	0.652042	-1.74584	-0.289022	0.0245657	0.19267	-0.56754	-0.289058	0.432401	0.727189	-1.525	-0.289	0.118675	0.555854	-0.718426	-0.288986	0.614615	0.978253	2.68156	-0.28903	1.682e-05	0.00190093	-0.131886	-0.288988	0.968836	1
ENSGALG00000011082	KCNH7	chr7	20330959	20538685	+	protein_coding	potassium channel, voltage gated eag related subfamily H, member 7 [Source:HGNC Symbol;Acc:HGNC:18863]	-0.895205	0.713155	0.602027	0.883251	-0.752599	0.713151	0.680374	0.914694	-2.99183	0.713155	0.00626973	0.0542036	-3.57408	0.713149	0.0212882	0.228257	-1.58168	0.713148	0.30362	0.887537	4.27144	0.713152	4.43102e-08	1.24193e-05	-2.64262	0.713148	0.0587889	0.464412
ENSGALG00000011478	2017-03-04	chr7	22892061	22970055	+	protein_coding	membrane-associated ring finger (C3HC4) 4, E3 ubiquitin protein ligase [Source:HGNC Symbol;Acc:HGNC:29269]	0.814582	-0.322847	0.267544	0.649132	-1.30355	-0.322858	0.236735	0.62621	-1.79911	-0.322848	0.0101504	0.075782	-1.88918	-0.322864	0.0365442	0.306849	-1.89497	-0.322868	0.0338104	0.353333	2.99398	-0.322856	6.93113e-06	0.000899379	-1.43314	-0.322868	0.126562	0.663483
ENSGALG00000011635	TFCP2L1	chr7	25539597	25568408	-	protein_coding	transcription factor CP2-like 1 [Source:HGNC Symbol;Acc:HGNC:17925]	0.521012	1.41052	0.498956	0.829225	-2.20655	1.41051	0.1448	0.491934	1.84527	1.41052	0.0157054	0.102683	-0.622404	1.4105	0.764572	0.975388	-1.39671	1.41049	0.362874	0.915292	-5.28333	1.41051	0.00117993	0.0399984	-0.0800551	1.41049	1	1
ENSGALG00000012106	SCTR	chr7	27855541	27870773	+	protein_coding	secretin receptor precursor [Source:RefSeq peptide;Acc:NP_001165013]	3.57993	1.9526	9.80998e-05	0.00428278	-0.112976	1.9526	1	1	-0.686406	1.9526	0.612767	0.838667	-6.3888	1.9526	0.000446293	0.0306696	-1.81945	1.9526	0.325837	0.900001	-6.39283	1.9526	0.000803396	0.0319852	-1.85267	1.9526	0.24592	0.839847
ENSGALG00000012190	TMEM163	chr7	29843289	29923932	-	protein_coding	transmembrane protein 163 [Source:HGNC Symbol;Acc:HGNC:25380]	-5.0888	0.963837	0.00155979	0.031138	-1.06368	0.963826	0.604415	0.880918	-2.51	0.963836	0.0443825	0.211269	1.45302	0.963821	0.14361	0.606555	-5.08442	0.963817	0.00174364	0.10301	3.12499	0.963828	0.000967392	0.0352131	-1.41282	0.963817	0.375442	0.912191
ENSGALG00000003671	RGSL1	chr8	5602313	5611991	-	protein_coding	regulator of G-protein signaling like 1 [Source:HGNC Symbol;Acc:HGNC:18636]	-1.58848	-0.374794	0.0666428	0.307113	-1.58613	-0.374787	0.0668109	0.329447	-1.70583	-0.374793	0.00406548	0.0389963	-1.57747	-0.374783	0.0777818	0.451251	1.47358	-0.37478	0.0539002	0.447487	2.54378	-0.374788	0.000275441	0.0153003	-1.61677	-0.37478	0.0324952	0.333618
ENSGALG00000004448	BRINP2	chr8	6700429	6705652	-	protein_coding	bone morphogenetic protein/retinoic acid inducible neural-specific 2 [Source:HGNC Symbol;Acc:HGNC:13746]	-6.16992	2.2342	0.00167696	0.0324016	-2.73811	2.23419	0.145694	0.493639	-0.392219	2.2342	0.815202	0.931223	0.706243	2.23419	0.430588	0.880312	-2.26666	2.23418	0.226347	0.827343	3.30438	2.23419	0.000551289	0.0249218	-4.17339	2.23418	0.015294	0.212968
ENSGALG00000026795	KIAA0040	chr8	7045676	7050533	+	protein_coding	KIAA0040 [Source:HGNC Symbol;Acc:HGNC:28950]	2.1505	2.12806	0.00480928	0.0630049	-0.27658	2.12806	0.919293	0.990037	-0.91784	2.12806	0.308908	0.629403	0.529045	2.12805	0.469663	0.897813	-0.167008	2.12805	1	1	-6.60126	2.12806	2.74485e-06	0.000400692	-0.944815	2.12805	0.406706	0.929806
ENSGALG00000004857	BRINP3	chr8	8198959	8401728	+	protein_coding	bone morphogenetic protein/retinoic acid inducible neural-specific 3 [Source:HGNC Symbol;Acc:HGNC:22393]	-3.9163	0.659085	0.0205361	0.150892	-4.60438	0.659097	0.00220401	0.0506345	-0.522042	0.659086	0.708343	0.883246	-1.68364	0.659104	0.359883	0.837312	-2.34835	0.659108	0.168473	0.74605	4.37343	0.659095	3.75324e-07	8.09199e-05	-4.64959	0.659108	0.000510974	0.0403929
ENSGALG00000008733	LPAR3	chr8	15361458	15367954	+	protein_coding	lysophosphatidic acid receptor 3 [Source:RefSeq peptide;Acc:NP_001107182]	-2.05427	-0.295581	0.0377457	0.21958	-2.05167	-0.295577	0.0374958	0.239066	-2.1865	-0.29558	0.0014943	0.0186381	-2.04214	-0.295576	0.0442689	0.334259	-2.0497	-0.295575	0.0413762	0.387339	4.57138	-0.295578	9.74477e-20	2.27605e-16	-2.08648	-0.295575	0.0162322	0.218982
ENSGALG00000009953		chr8	18554717	18556459	-	protein_coding	Uncharacterized protein [Source:UniProtKB/TrEMBL;Acc:F1NGV7]	0.344173	0.552609	0.610123	0.885749	0.107524	0.552599	0.773967	0.949508	0.911523	0.552608	0.224613	0.538256	-0.926632	0.552594	0.585947	0.935609	1.125	0.55259	0.191473	0.77998	-4.40008	0.552601	0.00134482	0.043727	-2.0856	0.552591	0.103013	0.613525
ENSGALG00000010203		chr8	19816839	19823208	-	protein_coding		-1.40446	1.667	0.0657152	0.304796	2.0369	1.667	0.00010598	0.00684427	0.350833	1.667	0.447595	0.740039	-2.95734	1.667	0.000547457	0.0347152	-0.571008	1.667	0.466204	0.948792	-3.83992	1.667	1.38568e-05	0.00165973	0.356413	1.667	0.479508	0.951018
ENSGALG00000010469		chr8	20783471	20790800	+	protein_coding	Uncharacterized protein [Source:UniProtKB/TrEMBL;Acc:F1NNP0]	-2.44117	-0.217897	0.0232469	0.163299	-2.43758	-0.21786	0.0229784	0.186138	-2.44882	-0.217893	0.00241846	0.0266095	-0.335264	-0.217839	0.960264	1	-2.4365	-0.217826	0.0256277	0.304515	4.40678	-0.217867	2.27727e-10	1.32973e-07	-2.47614	-0.217828	0.00898986	0.159853
ENSGALG00000028153		chr8	20873411	20875481	+	protein_coding	Uncharacterized protein [Source:UniProtKB/TrEMBL;Acc:R4GI79]	2.9987	2.6854	0.00121454	0.0262135	-1.85539	2.68541	0.301272	0.69981	-1.97131	2.6854	0.108471	0.362362	1.9874	2.68542	0.0432232	0.332636	-6.4826	2.68543	0.00144382	0.0962574	-7.02439	2.68541	0.000495128	0.0226756	-6.85864	2.68543	7.59724e-05	0.0180454
ENSGALG00000010533	ELAVL4	chr8	22464843	22521965	+	protein_coding	ELAV-like protein 4 [Source:RefSeq peptide;Acc:NP_990161]	-0.696692	5.64748	0.160889	0.506755	-1.55353	5.64748	0.00282187	0.0569564	-1.35136	5.64748	0.000520128	0.0083019	0.516152	5.64748	0.20987	0.705103	-1.52102	5.64748	0.00340327	0.132482	2.77689	5.64748	4.55282e-16	7.9754e-13	-1.20727	5.64748	0.00893359	0.159282
ENSGALG00000011259	RPE65	chr8	27675048	27681906	-	protein_coding	Retinoid isomerohydrolase [Source:UniProtKB/Swiss-Prot;Acc:Q9YGX2]	-0.634055	0.806468	0.687565	0.914188	0.998218	0.806456	0.219304	0.60482	0.406619	0.806467	0.539268	0.79887	-1.66087	0.806448	0.231592	0.730095	1.52513	0.806444	0.0626192	0.484018	-4.45242	0.806458	0.00150167	0.0474385	-1.28235	0.806444	0.275839	0.860267
ENSGALG00000011356	ERICH3	chr8	28511955	28528000	-	protein_coding	glutamate-rich 3 [Source:HGNC Symbol;Acc:HGNC:25346]	-0.838025	1.03934	0.635262	0.895177	0.482382	1.03937	0.528347	0.847767	0.673336	1.03934	0.381842	0.690516	-0.0417218	1.03938	1	1	0.789272	1.03939	0.35763	0.914542	-5.20158	1.03936	0.000812832	0.0320423	-0.413532	1.03939	0.843858	0.992118
ENSGALG00000001505	NGEF	chr9	574115	597244	-	protein_coding	ephexin-1 [Source:RefSeq peptide;Acc:NP_001010841]	-1.71347	2.29963	0.175351	0.527899	-1.08833	2.29963	0.4037	0.776301	1.33521	2.29963	0.0516558	0.233132	-0.728416	2.29963	0.622898	0.946265	0.219128	2.29963	0.69311	0.984317	-4.81682	2.29963	0.000923394	0.0342287	0.837686	2.29963	0.259186	0.852946
ENSGALG00000005511		chr9	5043819	5080768	-	protein_coding	Uncharacterized protein [Source:UniProtKB/TrEMBL;Acc:F1NTL8]	0.723532	-0.101032	0.355619	0.733213	-2.30861	-0.100999	0.0556148	0.298175	-1.92981	-0.101029	0.0338435	0.17553	-2.86152	-0.100981	0.00747682	0.132417	-2.87156	-0.100968	0.00659832	0.162226	2.76782	-0.101005	0.000364879	0.0188349	0.334806	-0.10097	0.617623	0.972446
ENSGALG00000002992	DAW1	chr9	9030864	9048830	+	protein_coding	dynein assembly factor with WDR repeat domains 1 [Source:HGNC Symbol;Acc:HGNC:26383]	0.305799	1.43244	0.640327	0.897184	-1.67002	1.43246	0.314768	0.71056	0.143688	1.43244	0.786942	0.917565	-0.0948453	1.43247	1	1	1.44938	1.43247	0.117688	0.649546	-5.7445	1.43245	0.000543946	0.0248302	0.0851359	1.43247	0.800355	0.988382
ENSGALG00000020627	SHOX2	chr9	22073505	22076647	+	protein_coding	short stature homeobox 2 [Source:HGNC Symbol;Acc:HGNC:10854]	-0.935523	-0.260517	0.479355	0.819229	-2.22132	-0.26052	0.0202942	0.17416	-2.36021	-0.260517	0.000461994	0.00760797	0.0138157	-0.260521	0.83547	0.986142	-2.21909	-0.260522	0.0226647	0.285399	3.80015	-0.260519	7.28282e-09	2.61696e-06	-2.2571	-0.260522	0.00763074	0.146089
ENSGALG00000002560		chr10	283204	284133	-	protein_coding	Olfactory receptor [Source:UniProtKB/TrEMBL;Acc:F1NWU8]	-2.25026	-0.253809	0.0274674	0.18243	-2.2478	-0.253819	0.027278	0.203278	-2.38691	-0.25381	0.000839133	0.0119508	-2.23823	-0.253824	0.0326176	0.28894	1.7827	-0.253827	0.0316789	0.34031	2.80527	-0.253817	0.000331186	0.0175141	-2.28369	-0.253827	0.0110204	0.177993
ENSGALG00000002093	NR2E3	chr10	896000	899679	+	protein_coding	photoreceptor-specific nuclear receptor [Source:RefSeq peptide;Acc:NP_989925]	-2.31397	-0.241781	0.0259399	0.175699	-2.31114	-0.241778	0.0257147	0.196217	-1.02748	-0.241781	0.26659	0.588098	-2.3011	-0.241776	0.0307688	0.27918	0.142436	-0.241774	0.770077	0.991438	3.5661	-0.241778	1.7393e-06	0.000270829	-2.34792	-0.241774	0.0102768	0.171802
ENSGALG00000003005	CHRNB4	chr10	3103512	3116708	+	protein_coding	neuronal acetylcholine receptor subunit beta-4 precursor [Source:RefSeq peptide;Acc:NP_990150]	-5.34194	1.52582	0.00980408	0.0968503	-5.87095	1.52582	0.00184995	0.0461753	-5.9364	1.52582	2.29175e-05	0.000806948	-5.85851	1.52582	0.0023775	0.0755393	-5.87076	1.52583	0.00208732	0.106498	8.58842	1.52582	2.99827e-35	4.20178e-31	-5.91748	1.52583	0.00041189	0.0381717
ENSGALG00000003014	CHRNA3	chr10	3121889	3127878	+	protein_coding	Neuronal acetylcholine receptor subunit alpha-3 [Source:UniProtKB/Swiss-Prot;Acc:P09481]	-3.29908	2.66291	0.0553086	0.275052	-5.81876	2.66291	0.00192074	0.0468941	-5.25217	2.66291	7.73755e-05	0.0020202	-0.841997	2.66291	0.691248	0.961755	-3.34288	2.66291	0.0550336	0.453114	3.25381	2.66291	0.000285404	0.0156849	1.39392	2.66291	0.120386	0.651892
ENSGALG00000003456	CA12	chr10	3588343	3607364	+	protein_coding	carbonic anhydrase XII [Source:HGNC Symbol;Acc:HGNC:1371]	-4.49736	3.78606	0.00694796	0.0792259	-4.24459	3.78608	0.010943	0.122684	0.36849	3.78606	0.595767	0.830698	-3.9192	3.78608	0.0216779	0.230671	-4.72778	3.78609	0.0053505	0.155799	3.34334	3.78607	6.39117e-05	0.00539553	-0.482332	3.78609	0.7826	0.988138
ENSGALG00000004641	MYO5C	chr10	8334755	8365618	+	protein_coding	myosin VC [Source:HGNC Symbol;Acc:HGNC:7604]	1.29544	1.75866	0.165455	0.51174	-0.77298	1.75864	0.70974	0.923353	0.0556435	1.75866	0.857165	0.947418	0.0338389	1.75863	0.803095	0.98198	0.92035	1.75863	0.309519	0.888913	-5.89073	1.75864	0.00114971	0.0394516	-0.954563	1.75863	0.548428	0.963678
ENSGALG00000004766	SCG3	chr10	8596070	8621388	-	protein_coding	secretogranin III [Source:HGNC Symbol;Acc:HGNC:13707]	-0.985929	5.07948	0.0655964	0.304393	-1.01007	5.07948	0.0622862	0.316709	-0.373536	5.07948	0.359722	0.671454	-0.764795	5.07948	0.169546	0.652216	-0.0657019	5.07948	0.956434	1	2.02766	5.07948	2.44461e-07	5.6162e-05	-0.332112	5.07948	0.505845	0.955122
ENSGALG00000005996	FSD2	chr10	10566516	10583094	-	protein_coding	fibronectin type III and SPRY domain containing 2 [Source:HGNC Symbol;Acc:HGNC:18024]	-2.84742	-0.1144	0.0102612	0.0997925	-1.59784	-0.114342	0.257433	0.652145	0.266171	-0.114394	0.673156	0.86659	-2.8318	-0.11431	0.0126958	0.174259	-1.98314	-0.114289	0.147253	0.704232	3.45824	-0.114353	1.17007e-05	0.00142586	-2.88445	-0.114292	0.00332881	0.0916501
ENSGALG00000006104	ADAMTSL3	chr10	10980738	11157843	+	protein_coding	ADAMTS-like 3 [Source:HGNC Symbol;Acc:HGNC:14633]	3.76434	4.29428	6.13529e-05	0.00290473	-2.91723	4.2943	0.131295	0.466837	-4.49859	4.29428	0.001693	0.0204356	0.858616	4.29431	0.363481	0.839872	-1.07042	4.29432	0.616799	0.978253	-8.959	4.2943	7.16341e-05	0.00576942	-2.07576	4.29432	0.211225	0.801763
ENSGALG00000026663	CX3CL1	chr11	766212	773374	+	protein_coding	Gallus gallus chemokine (C-X3-C motif) ligand 1 (CX3CL1), mRNA. [Source:RefSeq mRNA;Acc:NM_001077232]	0.40442	1.96052	0.580694	0.87157	2.76851	1.96051	0.00186422	0.0462181	-1.45569	1.96052	0.199243	0.505972	-0.980593	1.96051	0.608004	0.941855	-0.899265	1.96051	0.630539	0.980375	-6.40097	1.96052	0.000213414	0.0127811	-0.598651	1.96051	0.731419	0.981811
ENSGALG00000005178	CA7	chr11	10773808	10782445	-	protein_coding	carbonic anhydrase VII [Source:HGNC Symbol;Acc:HGNC:1381]	-1.40457	1.45795	0.392926	0.762557	-2.98185	1.45794	0.0693873	0.336585	-0.226195	1.45795	0.909296	0.968025	-2.60702	1.45793	0.127054	0.571652	-2.22169	1.45793	0.172424	0.751262	3.91458	1.45794	2.93001e-06	0.000423311	-5.82366	1.45793	2.43956e-05	0.0109777
ENSGALG00000005435	PKD1L3	chr11	14882016	14915308	-	protein_coding	polycystic kidney disease 1-like 3 [Source:HGNC Symbol;Acc:HGNC:21716]	0.514744	-0.199977	0.470033	0.814064	-2.13237	-0.19993	0.0468302	0.271957	-1.97306	-0.199972	0.0112429	0.0815094	-2.49902	-0.199905	0.00952613	0.150168	-0.288041	-0.199888	0.92142	1	3.21907	-0.199939	3.58919e-06	0.00050807	-2.00891	-0.19989	0.0311048	0.324838
ENSGALG00000005467	HSD17B2	chr11	15211744	15220427	+	protein_coding	hydroxysteroid (17-beta) dehydrogenase 2 [Source:HGNC Symbol;Acc:HGNC:5211]	-0.229791	1.48875	1	1	1.05691	1.48876	0.261112	0.656834	-0.637834	1.48875	0.629579	0.845967	-0.482842	1.48876	0.905139	0.996249	-1.92579	1.48876	0.296915	0.885501	-5.81427	1.48876	0.00110464	0.0385526	1.69558	1.48876	0.0662524	0.494388
ENSGALG00000005483	CDH13	chr11	15430489	15845338	+	protein_coding	cadherin-13 precursor [Source:RefSeq peptide;Acc:NP_001001760]	-0.939811	2.39415	0.540431	0.849677	0.824691	2.39416	0.319852	0.714555	1.4856	2.39415	0.0472968	0.220306	-0.0650933	2.39416	1	1	-0.470533	2.39416	0.823803	0.991713	-6.59768	2.39416	0.000106298	0.00769377	-1.37379	2.39416	0.28515	0.870231
ENSGALG00000000526		chr11	18259198	18260379	-	protein_coding	Uncharacterized protein [Source:UniProtKB/TrEMBL;Acc:F1NLB8]	-1.24498	-0.420605	0.112523	0.418165	-1.24242	-0.420591	0.11355	0.43352	-1.34801	-0.420604	0.0103143	0.076487	-1.23422	-0.420583	0.130189	0.578581	-1.24138	-0.420578	0.122045	0.657316	3.43094	-0.420594	4.2533e-14	6.62286e-11	-1.11012	-0.420579	0.166466	0.735219
ENSGALG00000000521	SPIRE2	chr11	18260413	18267088	+	protein_coding	spire-type actin nucleation factor 2 [Source:HGNC Symbol;Acc:HGNC:30623]	-3.0682	0.171914	0.0256019	0.174181	-2.84203	0.171918	0.0380274	0.241185	-0.00546042	0.171915	1	1	-3.61563	0.17192	0.0039797	0.0991561	0.266969	0.171921	0.664496	0.981678	3.23891	0.171917	7.57696e-05	0.00593204	-3.67012	0.171921	0.000747671	0.0469159
ENSGALG00000002335	DOCK3	chr12	2064730	2203333	+	protein_coding	dedicator of cytokinesis 3 [Source:HGNC Symbol;Acc:HGNC:2989]	-5.33148	1.61465	0.0025135	0.0421557	0.991631	1.61465	0.270442	0.667014	-1.18202	1.61465	0.302679	0.622157	-1.81925	1.61465	0.291198	0.791666	-1.41074	1.61465	0.402453	0.928675	-5.97585	1.61465	0.000397671	0.0199035	2.85367	1.61465	0.000740512	0.0469159
ENSGALG00000028339	AMIGO3	chr12	2379402	2380922	-	protein_coding	adhesion molecule with Ig-like domain 3 [Source:HGNC Symbol;Acc:HGNC:24075]	-3.472	3.84667	4.67033e-05	0.00236282	-2.88296	3.84666	0.000545477	0.0216553	-2.23461	3.84667	0.000185371	0.0038773	0.195781	3.84666	0.677746	0.957688	-2.89822	3.84666	0.000555178	0.0654638	2.48245	3.84667	1.45592e-06	0.000231855	1.38442	3.84666	0.00719944	0.141263
ENSGALG00000003203		chr12	2652389	2657378	+	protein_coding	Uncharacterized protein [Source:UniProtKB/TrEMBL;Acc:F1NNM9]	-2.10725	1.50309	0.138478	0.466835	0.76377	1.50308	0.34988	0.739482	-0.954824	1.50309	0.348045	0.662367	-1.88764	1.50308	0.208759	0.703596	-1.57005	1.50307	0.27813	0.874624	2.66508	1.50308	0.00125644	0.0418235	-0.839167	1.50307	0.529219	0.960126
ENSGALG00000007785	PROK2	chr12	16290360	16292199	-	protein_coding	prokineticin 2 [Source:HGNC Symbol;Acc:HGNC:18455]	-3.19126	0.00328129	0.00736421	0.0818414	0.213521	0.00329184	0.695622	0.918375	-0.494711	0.00328232	0.678022	0.869412	-2.93556	0.00329772	0.0249575	0.248008	-0.588357	0.00330157	0.782321	0.991713	3.13056	0.00328992	0.000172626	0.011252	-3.22934	0.00330101	0.00220905	0.0718273
ENSGALG00000026939		chr13	339005	342588	-	protein_coding	Uncharacterized protein [Source:UniProtKB/TrEMBL;Acc:R4GGZ8]	-0.775613	0.477463	0.709823	0.921337	-4.26964	0.477456	0.00330863	0.0620563	-3.55466	0.477463	0.0026935	0.0287703	-4.25772	0.477451	0.00424007	0.101922	-4.26896	0.477448	0.00376739	0.137198	4.49912	0.477457	1.05396e-07	2.73521e-05	-0.46567	0.477449	0.844681	0.992118
ENSGALG00000002577	STARD10	chr13	1328980	1335143	-	protein_coding	StAR-related lipid transfer (START) domain containing 10 [Source:HGNC Symbol;Acc:HGNC:10666]	-0.788895	3.81629	0.467866	0.812843	0.084029	3.81629	0.805672	0.958613	-1.79896	3.81629	0.0214582	0.128951	-0.729261	3.81629	0.532379	0.925302	-1.41064	3.81629	0.186069	0.772158	2.6122	3.81629	8.25604e-05	0.00639206	-0.307022	3.81629	0.798304	0.988382
ENSGALG00000002191	TLX2	chr13	2673915	2675387	-	protein_coding	T-cell leukemia homeobox 2 [Source:HGNC Symbol;Acc:HGNC:5057]	-3.61954	0.400429	0.0127931	0.113421	-4.12265	0.400427	0.00260101	0.0552249	-4.1797	0.400429	4.68351e-05	0.00138763	0.851047	0.400427	0.335854	0.824501	-2.83701	0.400426	0.0683583	0.506061	4.16601	0.400428	4.36607e-07	8.74088e-05	-2.23469	0.400426	0.105768	0.619402
ENSGALG00000002132	KCNIP1	chr13	2890226	2905434	-	protein_coding	Kv channel interacting protein 1 [Source:HGNC Symbol;Acc:HGNC:15521]	1.72727	2.13583	0.0479515	0.253582	0.231165	2.13582	0.688022	0.916386	-1.52992	2.13583	0.146377	0.430049	-0.061705	2.13582	1	1	0.416021	2.13582	0.564631	0.968906	-6.38417	2.13582	0.000149094	0.00999712	0.0453805	2.13582	0.834935	0.992118
ENSGALG00000002886	NKX2-5	chr13	8535721	8537935	-	protein_coding	homeobox protein Nkx-2.5 [Source:RefSeq peptide;Acc:NP_990495]	1.76597	3.8346	0.0317199	0.199696	1.12902	3.8346	0.172792	0.537276	-0.524668	3.8346	0.611992	0.838213	0.516831	3.8346	0.490638	0.910592	-1.39101	3.83461	0.316563	0.893832	-8.25832	3.8346	1.4442e-06	0.000231855	-1.98809	3.8346	0.103997	0.615463
ENSGALG00000003744	ADAM19	chr13	10642122	10669352	+	protein_coding	disintegrin and metalloproteinase domain-containing protein 19 precursor [Source:RefSeq peptide;Acc:NP_001182051]	-5.58551	1.80576	0.00314693	0.0485694	-4.32028	1.80576	0.0252164	0.195131	-1.37874	1.80576	0.280326	0.601055	-0.787752	1.80576	0.765684	0.975659	-1.38256	1.80575	0.480679	0.954433	3.91183	1.80576	2.48181e-05	0.00259553	-0.880773	1.80575	0.629822	0.973473
ENSGALG00000003761	NIPAL4	chr13	10668257	10680834	-	protein_coding	NIPA-like domain containing 4 [Source:HGNC Symbol;Acc:HGNC:28018]	-5.90536	1.55146	0.000384615	0.0115417	-1.73667	1.55145	0.32924	0.722849	-0.941988	1.55146	0.446087	0.739095	-1.19217	1.55145	0.552995	0.929255	-0.964425	1.55145	0.63206	0.980375	3.58895	1.55145	7.26928e-05	0.00582124	-1.13563	1.55145	0.480312	0.951018
ENSGALG00000026787	HAND1	chr13	11453019	11454119	+	protein_coding	heart- and neural crest derivatives-expressed protein 1 [Source:RefSeq peptide;Acc:NP_990296]	1.24155	0.466875	0.133445	0.458133	3.03424	0.466901	8.95754e-05	0.0062144	-3.25251	0.466878	0.000799059	0.0115563	-0.766684	0.466915	0.640728	0.94997	-0.691779	0.466924	0.657649	0.981678	-4.25516	0.466896	0.000934523	0.0344642	-4.02965	0.466923	0.000244704	0.0329328
ENSGALG00000004083	GluR1/A	chr13	11646223	11753641	-	protein_coding	glutamate receptor 1 precursor [Source:RefSeq peptide;Acc:NP_001001774]	-2.98831	1.34672	0.066952	0.307722	-5.62787	1.3467	0.000247225	0.0122859	2.88804	1.34672	0.000224098	0.00441703	-0.849139	1.34669	0.678325	0.957688	-5.62752	1.34669	0.00029131	0.0512611	-5.34882	1.34671	0.00158324	0.0490367	0.618858	1.34669	0.443912	0.941289
ENSGALG00000005672	SLC6A7	chr13	12538728	12548642	-	protein_coding	solute carrier family 6 (neurotransmitter transporter), member 7 [Source:HGNC Symbol;Acc:HGNC:11054]	0.836329	1.71139	0.359346	0.737532	2.67879	1.71143	0.00505781	0.0765444	-6.29175	1.71139	2.73567e-07	1.94607e-05	0.981353	1.71145	0.3014	0.800165	-0.48637	1.71147	0.896323	0.999969	-6.10991	1.71142	0.000958328	0.0350977	-5.75499	1.71146	0.000514789	0.0403929
ENSGALG00000021313	PDGFRB	chr13	12566519	12588276	+	protein_coding	platelet-derived growth factor receptor, beta polypeptide [Source:HGNC Symbol;Acc:HGNC:8804]	-0.0560834	0.543903	1	1	0.728479	0.543879	0.36017	0.748696	-1.0455	0.543901	0.291928	0.61087	2.26864	0.543865	0.00669919	0.12501	-1.73644	0.543856	0.217228	0.814084	-4.37878	0.543883	0.000925693	0.0342287	-0.452183	0.543857	0.774451	0.987603
ENSGALG00000006297	TRPC7	chr13	14312689	14371262	+	protein_coding	transient receptor potential cation channel, subfamily C, member 7 [Source:HGNC Symbol;Acc:HGNC:20754]	-3.97892	0.324502	0.0048981	0.0638447	-3.9751	0.324515	0.00476977	0.0745453	-3.32075	0.324503	0.00390699	0.0377343	-3.96321	0.324523	0.00600905	0.119448	-3.97439	0.324528	0.00540628	0.155889	3.27797	0.324513	0.000308419	0.0166238	1.66197	0.324527	0.0689239	0.504386
ENSGALG00000006785	IRF1	chr13	16213206	16217341	-	protein_coding	Interferon regulatory factor 1 [Source:UniProtKB/Swiss-Prot;Acc:Q90876]	1.47278	2.51325	0.0396931	0.225571	0.0987604	2.51324	0.791955	0.95534	0.259648	2.51325	0.641966	0.852488	-0.218349	2.51324	0.941069	1	-0.269182	2.51324	0.887436	0.998615	-5.10313	2.51324	9.51967e-05	0.00702151	-0.677827	2.51324	0.510694	0.956229
ENSGALG00000028407	GDF-9	chr13	16391712	16394110	+	protein_coding	Growth differentiation factor 9 [Source:UniProtKB/TrEMBL;Acc:Q6Q247]	0.228437	0.101729	0.650032	0.900242	1.2563	0.101715	0.0223536	0.182978	-0.826035	0.101728	0.143635	0.42472	1.35018	0.101707	0.0154534	0.193533	-1.40255	0.101702	0.0639325	0.489323	-2.42753	0.101718	0.00158428	0.0490367	-0.395152	0.101703	0.586874	0.969179
ENSGALG00000007394	NR3C1	chr13	16854278	16904972	-	protein_coding	glucocorticoid receptor [Source:RefSeq peptide;Acc:NP_001032915]	0.290633	2.41136	0.603268	0.883664	1.24917	2.41136	0.0519264	0.288382	-0.832903	2.41136	0.219952	0.533105	0.373025	2.41136	0.532504	0.925302	-0.0486327	2.41135	1	1	-4.31106	2.41136	6.62093e-05	0.00546396	0.206701	2.41135	0.683128	0.976745
ENSGALG00000007669	EGR1	chr13	17704810	17707611	+	protein_coding	Early growth response protein 1 [Source:UniProtKB/Swiss-Prot;Acc:O73691]	0.780179	2.88346	0.354169	0.73111	-1.21495	2.88347	0.445425	0.802023	1.13618	2.88346	0.144947	0.42719	-0.822882	2.88347	0.65659	0.954067	0.756553	2.88348	0.36788	0.915384	-7.46037	2.88347	1.89883e-05	0.00209529	-1.04204	2.88347	0.454118	0.943398
ENSGALG00000004530	MMD2	chr14	4031930	4034734	-	protein_coding	monocyte to macrophage differentiation-associated 2 [Source:HGNC Symbol;Acc:HGNC:30133]	-2.05294	3.59724	0.0234853	0.164315	-1.43499	3.59724	0.108989	0.424505	-1.07299	3.59724	0.0997321	0.344163	-0.194924	3.59724	0.90651	0.996546	-2.22318	3.59724	0.0160884	0.24913	2.71588	3.59724	1.85772e-06	0.00028609	0.304325	3.59724	0.570403	0.965682
ENSGALG00000004860	RASD1	chr14	4778983	4780829	-	protein_coding	dexamethasone-induced Ras-related protein 1 [Source:RefSeq peptide;Acc:NP_001038101]	0.970101	0.0179921	0.203119	0.566956	-1.52298	0.0179835	0.184664	0.556222	-1.39775	0.0179913	0.0887672	0.320532	-0.321212	0.0179787	0.915078	0.998591	-2.96257	0.0179756	0.00517378	0.154395	2.45891	0.0179851	0.000814211	0.0320423	-1.01101	0.0179761	0.35779	0.908017
ENSGALG00000005293	GNG13	chr14	5968997	5970919	+	protein_coding	guanine nucleotide binding protein (G protein), gamma 13 [Source:RefSeq peptide;Acc:NP_001254748]	-2.8511	1.36642	0.0546904	0.273921	-5.11112	1.36642	0.000806426	0.0286108	-2.28942	1.36642	0.0287187	0.157732	-2.33709	1.36642	0.129122	0.577015	-4.4822	1.36642	0.0032366	0.128857	5.78273	1.36642	3.41642e-18	6.83967e-15	-5.48544	1.36642	2.42503e-05	0.0109777
ENSGALG00000006290	HS3ST4	chr14	7061089	7127626	+	protein_coding	heparan sulfate (glucosamine) 3-O-sulfotransferase 4 [Source:HGNC Symbol;Acc:HGNC:5200]	-2.1198	-0.28288	0.0113081	0.106143	-1.68866	-0.282873	0.0768647	0.352366	-0.99155	-0.282879	0.191612	0.495549	-1.88655	-0.282869	0.0473335	0.348023	1.12191	-0.282867	0.112907	0.639305	2.16976	-0.282874	0.00164552	0.0497506	-0.100104	-0.282867	1	1
ENSGALG00000007278	GRIN2A	chr14	9244461	9392231	+	protein_coding	glutamate receptor, ionotropic, N-methyl D-aspartate 2A [Source:HGNC Symbol;Acc:HGNC:4585]	-1.61257	1.09369	0.33087	0.710797	0.492321	1.09368	0.528805	0.847767	1.93139	1.09369	0.0177379	0.11253	-0.0841579	1.09367	1	1	-1.17658	1.09367	0.503829	0.960425	-5.26837	1.09368	0.00121943	0.0407854	-1.02226	1.09367	0.502128	0.954801
ENSGALG00000014179	SBK1	chr14	12938587	12940584	-	protein_coding	SH3 domain binding kinase 1 [Source:HGNC Symbol;Acc:HGNC:17699]	-1.14839	-0.281783	0.289446	0.673133	-2.11887	-0.281785	0.0181126	0.16292	-2.1396	-0.281783	0.00163088	0.0198567	-2.10938	-0.281787	0.0225166	0.233642	-1.52692	-0.281788	0.165093	0.737615	2.97422	-0.281785	1.39945e-05	0.0016601	0.839624	-0.281788	0.227157	0.824281
ENSGALG00000002242	GALNT9	chr15	2342102	2458959	+	protein_coding	polypeptide N-acetylgalactosaminyltransferase 9 [Source:HGNC Symbol;Acc:HGNC:4131]	-3.80144	4.03065	0.0261562	0.176228	-3.3404	4.03065	0.0493935	0.281273	-2.52359	4.03065	0.030252	0.163688	0.671978	4.03064	0.428003	0.879378	-8.68911	4.03064	3.271e-06	0.00318091	4.34969	4.03065	1.54283e-07	3.86093e-05	-3.71395	4.03064	0.0148379	0.210464
ENSGALG00000004540	RAD9B	chr15	5941111	5947675	+	protein_coding	RAD9 homolog B (S. pombe) [Source:HGNC Symbol;Acc:HGNC:21700]	-1.6519	0.623992	0.277693	0.659814	1.08968	0.623972	0.212017	0.595671	-0.582727	0.62399	0.612226	0.838274	1.3714	0.62396	0.126685	0.570859	1.32431	0.623953	0.135298	0.681559	-4.52288	0.623975	0.00160835	0.0492764	-2.67469	0.623954	0.0431502	0.392198
ENSGALG00000004582	MYL2	chr15	6028493	6032632	-	protein_coding	myosin regulatory light chain 2A, cardiac muscle isoform [Source:RefSeq peptide;Acc:NP_001258858]	10.1856	4.92671	2.38896e-32	3.34789e-28	-5.68038	4.92671	0.0209865	0.177386	-7.6817	4.92671	2.70858e-05	0.000925807	-7.97004	4.92671	0.00331716	0.0916898	-9.61423	4.92671	0.000124219	0.0301608	-9.20882	4.92671	0.000949972	0.034942	-8.29739	4.92671	0.00037301	0.0368951
ENSGALG00000005062	FOXN4	chr15	6671647	6674817	-	protein_coding	forkhead box protein N4 [Source:RefSeq peptide;Acc:NP_001076828]	-1.65447	-0.364491	0.0541307	0.272298	0.777516	-0.364488	0.262863	0.658429	-1.77395	-0.364491	0.00276259	0.029263	-1.6437	-0.364487	0.0641198	0.409413	-1.65006	-0.364486	0.0595269	0.470242	2.94503	-0.364489	7.98897e-06	0.00102426	-1.06461	-0.364486	0.221277	0.817404
ENSGALG00000005379		chr15	6834753	6937004	+	protein_coding	Uncharacterized protein [Source:UniProtKB/TrEMBL;Acc:F1NXW4]	-3.30294	0.049539	0.00918725	0.0936364	-3.29968	0.0495165	0.00899144	0.108022	-0.0706497	0.0495368	1	1	-3.28862	0.0495039	0.0110862	0.162288	-1.48761	0.0494957	0.356544	0.914037	3.89125	0.0495206	2.6242e-06	0.00038711	-3.34132	0.0494969	0.00287207	0.0838968
ENSGALG00000005630	CRYBB1	chr15	7176718	7179013	-	protein_coding	Beta-crystallin B1 [Source:UniProtKB/Swiss-Prot;Acc:P07530]	-1.32368	-0.382515	0.140486	0.47118	-1.52972	-0.382515	0.0523136	0.288997	-0.752027	-0.382515	0.320868	0.640681	-0.69273	-0.382514	0.582336	0.935374	-1.52717	-0.382514	0.0571326	0.459321	3.24939	-0.382515	5.02187e-09	1.85201e-06	-1.55909	-0.382514	0.023865	0.277317
ENSGALG00000005634	CRYBA4	chr15	7181150	7182285	+	protein_coding	beta-crystallin A4 [Source:RefSeq peptide;Acc:NP_989509]	-3.55154	0.636515	0.015335	0.126563	-4.56161	0.636517	0.000606969	0.0233683	-1.03179	0.636516	0.327706	0.646895	-1.03063	0.636518	0.545394	0.929017	-4.56093	0.636519	0.00071474	0.0726712	4.48429	0.636517	2.39894e-09	1.01875e-06	-2.39747	0.636519	0.0670221	0.497581
ENSGALG00000006642	ADORA2A	chr15	8481375	8491459	-	protein_coding	adenosine A2a receptor [Source:HGNC Symbol;Acc:HGNC:263]	0.910861	1.98881	0.277246	0.65968	1.46179	1.98883	0.0902501	0.381528	-2.19497	1.98881	0.0351924	0.180456	-0.212149	1.98884	1	1	-1.83261	1.98884	0.215251	0.813214	-6.22977	1.98882	0.000121711	0.00865819	1.19019	1.98884	0.146077	0.698108
ENSGALG00000006728	SLC5A1	chr15	8768960	8794948	-	protein_coding	solute carrier family 5 (sodium/glucose cotransporter), member 1 [Source:HGNC Symbol;Acc:HGNC:11036]	-0.0865197	1.34461	1	1	-3.386	1.34462	0.0318225	0.219577	1.58147	1.34461	0.0424718	0.205029	-1.91601	1.34462	0.234057	0.732609	1.35544	1.34462	0.129079	0.670467	-5.12665	1.34462	0.00161632	0.0493204	-0.8799	1.34462	0.540397	0.963127
ENSGALG00000007376	CCDC60	chr15	9672623	9717861	-	protein_coding	coiled-coil domain containing 60 [Source:HGNC Symbol;Acc:HGNC:28610]	-2.76719	-0.125754	0.0152708	0.126331	-2.7642	-0.125762	0.0150664	0.146952	0.318491	-0.125754	0.628149	0.845456	-2.75367	-0.125766	0.0183345	0.211997	-2.76253	-0.125769	0.0168646	0.252771	3.58653	-0.12576	6.18786e-06	0.000810436	-2.80351	-0.125769	0.00537174	0.11855
ENSGALG00000027366		chr15	9728774	9733744	-	protein_coding	Uncharacterized protein [Source:UniProtKB/TrEMBL;Acc:R4GLJ9]	-2.15621	-0.274788	0.0260377	0.176012	-2.15368	-0.274789	0.0260119	0.197685	-2.29093	-0.274789	0.000743299	0.0108846	0.586612	-0.27479	0.419107	0.874966	-2.15152	-0.27479	0.0289222	0.323734	3.69836	-0.274789	5.29254e-08	1.39943e-05	-2.18905	-0.27479	0.0103589	0.172411
ENSGALG00000007388		chr15	9728774	9754570	-	protein_coding	Uncharacterized protein [Source:UniProtKB/TrEMBL;Acc:E1C6U3]	-5.22333	1.05223	0.000814865	0.0201758	-1.45712	1.05223	0.419165	0.786264	-4.02871	1.05223	0.0010731	0.0144323	0.328802	1.05223	0.624882	0.946779	-1.47017	1.05223	0.405496	0.928675	3.3157	1.05223	0.000251037	0.0144412	0.0294762	1.05223	0.834232	0.992118
ENSGALG00000028830	CCDC42B	chr15	9902542	9904718	+	protein_coding	coiled-coil domain containing 42B [Source:HGNC Symbol;Acc:HGNC:37100]	-0.981506	0.490545	0.495174	0.826822	1.94232	0.49053	0.0177073	0.160294	-0.10913	0.490544	0.988743	1	0.802899	0.490521	0.32156	0.81464	-0.409193	0.490515	0.845399	0.994204	-4.28339	0.490532	0.00085306	0.0330242	-1.35727	0.490516	0.258449	0.852724
ENSGALG00000008085	NEFH	chr15	11120949	11126680	-	protein_coding	neurofilament, heavy polypeptide [Source:HGNC Symbol;Acc:HGNC:7737]	-1.61199	-0.370461	0.0612072	0.291956	-1.61012	-0.370465	0.0614751	0.31431	-1.72941	-0.370462	0.00347493	0.0344397	-1.60195	-0.370466	0.0719323	0.432393	0.703376	-0.370468	0.317557	0.893953	3.09206	-0.370464	1.52125e-06	0.000239538	-1.64031	-0.370467	0.0293003	0.31273
ENSGALG00000008177	NOS1	chr15	11287023	11315239	+	protein_coding	nitric oxide synthase 1 (neuronal) [Source:HGNC Symbol;Acc:HGNC:7872]	-1.99205	-0.305819	0.0367712	0.216426	-1.98992	-0.305828	0.0366844	0.237078	0.169876	-0.305819	0.746402	0.900456	-1.98097	-0.305834	0.0435386	0.333326	-1.98744	-0.305837	0.0404516	0.383228	3.25687	-0.305827	4.07306e-06	0.000559607	-2.02361	-0.305837	0.0157453	0.215273
ENSGALG00000026396	BG1	chr16	114604	118870	+	protein_coding	uncharacterized protein LOC426940 precursor [Source:RefSeq peptide;Acc:NP_001092825]	0.013893	0.540949	0.91825	0.98896	-0.037399	0.540943	0.99923	1	0.0964915	0.540949	0.716977	0.887266	0.861614	0.54094	0.026767	0.259122	0.173772	0.540938	0.651191	0.981678	-2.11905	0.540944	4.52057e-05	0.00419545	-0.148051	0.540938	0.754466	0.984456
ENSGALG00000024011	Ex-FABP	chr17	501842	504845	-	protein_coding	extracellular fatty acid-binding protein precursor [Source:RefSeq peptide;Acc:NP_990753]	0.568946	1.5158	0.478489	0.819207	-0.375318	1.5158	0.920941	0.990385	0.756257	1.5158	0.33258	0.649805	0.825545	1.51579	0.344733	0.8279	-0.0927299	1.51579	1	1	-5.84697	1.5158	0.000340081	0.0178498	-1.14118	1.51579	0.425476	0.93616
ENSGALG00000007186	C9orf91	chr17	2510801	2518312	+	protein_coding	chromosome 9 open reading frame 91 [Source:HGNC Symbol;Acc:HGNC:24513]	1.39566	1.64692	0.140358	0.471128	2.04147	1.6469	0.0318116	0.219577	-0.762903	1.64692	0.543373	0.801316	-3.25619	1.64689	0.074308	0.438834	-0.329338	1.64688	0.96947	1	-6.01112	1.6469	0.000698198	0.0290343	-1.02852	1.64688	0.520831	0.958033
ENSGALG00000007001	TLR4	chr17	3566454	3571907	+	protein_coding	toll-like receptor 4 precursor [Source:RefSeq peptide;Acc:NP_001025864]	-3.20287	0.0111036	0.0127394	0.11328	-3.19953	0.0110959	0.0124001	0.131717	-3.35653	0.0111028	0.000220083	0.00436894	-3.18844	0.0110917	0.014997	0.189904	-3.19831	0.0110889	0.0138782	0.234868	5.90979	0.0110973	3.07548e-24	1.43666e-20	-3.24098	0.0110893	0.00426752	0.105291
ENSGALG00000003895	PRDM12	chr17	5956541	5962675	+	protein_coding	PR domain containing 12 [Source:HGNC Symbol;Acc:HGNC:13997]	-6.20379	2.35259	1.23742e-05	0.000850061	-5.475	2.35258	0.000141812	0.00828066	-1.06145	2.35259	0.24577	0.563279	-0.381013	2.35258	0.860805	0.989131	-3.3216	2.35258	0.0146605	0.241254	3.1228	2.35258	2.52483e-05	0.00260169	0.624221	2.35258	0.389818	0.919681
ENSGALG00000025516	gga-mir-1753	chr17	5958864	5958942	+	miRNA	gga-mir-1753 [Source:miRBase;Acc:MI0007494]	-2.94221	-0.0751	0.000711894	0.0184068	-2.5689	-0.075108	0.00760995	0.0964248	-0.559221	-0.0751008	0.473253	0.757409	-0.159581	-0.0751125	1	1	-2.16081	-0.0751155	0.02685	0.312522	2.56692	-0.0751065	6.50524e-05	0.00545894	0.489218	-0.075115	0.444192	0.941456
ENSGALG00000000940	ALC	chr17	10052537	10053722	-	protein_coding	ALC protein [Source:RefSeq peptide;Acc:NP_989771]	-0.675545	-0.271455	0.64898	0.900242	-2.19809	-0.27141	0.0242514	0.191668	0.0460347	-0.271451	0.881959	0.957579	-1.96271	-0.271385	0.0786485	0.454205	-2.1973	-0.271369	0.0270934	0.31457	2.96852	-0.271418	0.000109167	0.00784545	-1.06978	-0.271371	0.333968	0.895567
ENSGALG00000023638		chr18	1230861	1233486	-	protein_coding	Uncharacterized protein [Source:UniProtKB/TrEMBL;Acc:F1NU96]	-1.23619	-0.421095	0.107323	0.407392	-1.23473	-0.421096	0.108405	0.423171	-1.33735	-0.421095	0.00948496	0.072503	-1.2277	-0.421097	0.124588	0.568466	-1.23222	-0.421097	0.116396	0.646263	3.33739	-0.421096	3.54279e-13	4.13738e-10	-0.950702	-0.421097	0.288856	0.873978
ENSGALG00000001150		chr18	1236324	1452695	-	protein_coding	Uncharacterized protein [Source:UniProtKB/TrEMBL;Acc:F1P3R5]	-2.9232	-0.0794821	0.00416276	0.057989	-2.56872	-0.0794958	0.0138269	0.139403	-0.265121	-0.0794835	0.839741	0.940516	-2.90963	-0.0795035	0.0056234	0.116234	-1.0859	-0.0795085	0.408123	0.929198	2.99275	-0.0794933	4.57379e-05	0.00421692	0.031794	-0.0795077	0.86082	0.993438
ENSGALG00000003114	NOG	chr18	6162700	6163371	+	protein_coding	noggin precursor [Source:RefSeq peptide;Acc:NP_989454]	-1.88389	3.05282	0.0348283	0.21029	-0.944551	3.05282	0.287487	0.686929	1.93015	3.05282	0.000130388	0.00303786	-3.65204	3.05282	0.000331715	0.0265637	0.291811	3.05282	0.593619	0.974169	-5.57577	3.05282	3.30564e-07	7.23832e-05	0.470094	3.05282	0.405573	0.929806
ENSGALG00000028125	CACNG4	chr18	7516984	7555737	-	protein_coding	voltage-dependent calcium channel gamma-4 subunit [Source:RefSeq peptide;Acc:NP_989463]	-1.50218	2.40889	0.301639	0.68701	-2.55623	2.40889	0.0856289	0.371491	-2.1429	2.40889	0.0394876	0.195402	0.905596	2.40888	0.287681	0.788029	-1.76453	2.40888	0.228994	0.829416	2.81747	2.40889	0.000667727	0.0282265	-0.276322	2.40888	0.916322	0.997671
ENSGALG00000004502	KIF19	chr18	9398568	9402518	+	protein_coding	kinesin family member 19 [Source:HGNC Symbol;Acc:HGNC:26735]	-5.59646	1.31733	0.00159226	0.031428	-5.35605	1.31733	0.00376439	0.0661079	-5.76462	1.31733	4.64261e-06	0.000223579	-1.01356	1.31733	0.680843	0.957977	-1.78843	1.31733	0.36873	0.915384	5.12225	1.31733	1.23177e-08	4.11002e-06	-1.55927	1.31733	0.362727	0.90828
ENSGALG00000023359	BTBD17	chr18	9402986	9406146	-	protein_coding	BTB (POZ) domain containing 17 [Source:HGNC Symbol;Acc:HGNC:33758]	-3.31121	2.49793	0.0171527	0.136346	-2.13496	2.49793	0.114308	0.434595	-0.289318	2.49793	0.806032	0.92778	-1.98108	2.49792	0.157839	0.632347	-1.01227	2.49792	0.466709	0.948994	3.00924	2.49793	8.86567e-05	0.00671586	-0.214452	2.49792	0.942747	1
ENSGALG00000007367	WFIKKN2	chr18	10370916	10376965	-	protein_coding	WAP, follistatin/kazal, immunoglobulin, kunitz and netrin domain containing 2 [Source:HGNC Symbol;Acc:HGNC:30916]	-3.12832	-0.0133935	0.0120858	0.10992	-3.12509	-0.013406	0.0118219	0.128044	-3.28091	-0.0133947	0.000196806	0.00404999	-0.0860148	-0.013413	1	1	-3.12373	-0.0134176	0.0132552	0.23094	4.75161	-0.0134038	5.98091e-10	2.99345e-07	-3.16613	-0.0134169	0.00401462	0.102666
ENSGALG00000001917	SSC4D	chr19	4217392	4226022	+	protein_coding	scavenger receptor cysteine rich family, 4 domains [Source:HGNC Symbol;Acc:HGNC:14461]	-4.99222	0.899525	0.00166359	0.0322693	0.0830744	0.89952	0.773386	0.94936	-1.14434	0.899525	0.357837	0.669928	-0.912403	0.899517	0.692977	0.961798	-0.400093	0.899515	0.945658	1	3.30262	0.899521	0.000400547	0.0199761	-5.03393	0.899515	0.000350237	0.0360899
ENSGALG00000001932	SRRM3	chr19	4258499	4275358	-	protein_coding	serine/arginine repetitive matrix 3 [Source:HGNC Symbol;Acc:HGNC:26729]	-2.92278	-0.0810202	0.00999214	0.0980005	-2.91964	-0.0810233	0.00990365	0.114773	-3.0727	-0.0810205	0.000132486	0.00307904	0.640446	-0.0810251	0.416494	0.87311	-2.91807	-0.0810263	0.0111882	0.209236	4.16943	-0.0810228	1.90203e-08	5.92334e-06	-2.95977	-0.0810261	0.00321117	0.0894658
ENSGALG00000002312	TMEM132E	chr19	4751718	4761990	-	protein_coding	transmembrane protein 132E [Source:HGNC Symbol;Acc:HGNC:26991]	-2.19677	-0.265881	0.020642	0.151218	-2.19435	-0.265887	0.0207466	0.176101	-0.733131	-0.265882	0.413129	0.714311	-2.18479	-0.26589	0.0254174	0.251376	-2.192	-0.265892	0.0231381	0.289515	3.20527	-0.265886	4.71345e-06	0.000641303	0.160657	-0.265891	0.754917	0.984456
ENSGALG00000027107	PROCA1	chr19	5794727	5796856	-	protein_coding	protein interacting with cyclin A1 [Source:HGNC Symbol;Acc:HGNC:28600]	-1.5531	3.9133	0.00380415	0.0547521	-0.0597974	3.9133	0.967583	1	1.85134	3.9133	7.98744e-09	9.17509e-07	-1.2058	3.9133	0.0284531	0.268694	-0.781238	3.9133	0.137747	0.685265	-2.33701	3.9133	5.55834e-05	0.00483817	0.047328	3.9133	0.858713	0.993419
ENSGALG00000005549	CUEDC1	chr19	8743459	8748278	+	protein_coding	CUE domain containing 1 [Source:HGNC Symbol;Acc:HGNC:31350]	0.350485	0.411524	0.461077	0.807995	0.528609	0.411517	0.283683	0.68175	0.0521889	0.411523	0.855604	0.946588	0.211205	0.411514	0.644196	0.951245	-1.69575	0.411512	0.00844131	0.185128	-2.20604	0.411518	0.00164753	0.0497506	0.710805	0.411512	0.123578	0.65929
ENSGALG00000025916	EMILIN3	chr20	5314292	5324952	-	protein_coding	elastin microfibril interfacer 3 [Source:HGNC Symbol;Acc:HGNC:16123]	-2.50637	2.07693	0.107357	0.407392	-3.24244	2.07693	0.041793	0.254868	-2.89148	2.07693	0.00993095	0.0748238	-0.0271521	2.07692	1	1	-2.5058	2.07692	0.108391	0.627218	3.20647	2.07693	0.000146027	0.00984961	0.640852	2.07692	0.421436	0.935826
ENSGALG00000005102	CDH4	chr20	7702268	8001028	+	protein_coding	cadherin-4 precursor [Source:RefSeq peptide;Acc:NP_001004391]	-0.458494	3.19185	0.68596	0.913527	-0.401999	3.19186	0.734923	0.932326	-1.09055	3.19185	0.132285	0.406724	-2.69712	3.19187	0.0132878	0.180008	0.142937	3.19187	0.752284	0.989688	2.10454	3.19186	0.00131082	0.0428201	0.00898479	3.19187	0.894575	0.995278
ENSGALG00000005352	GATA5	chr20	8368251	8377966	-	protein_coding	transcription factor GATA-5 [Source:RefSeq peptide;Acc:NP_990752]	2.0296	4.33763	0.00864512	0.0898093	1.89103	4.33764	0.0156484	0.150307	-1.39678	4.33763	0.123922	0.391401	0.281171	4.33764	0.644678	0.951302	-2.21987	4.33764	0.0869968	0.571279	-8.65948	4.33763	2.16857e-07	5.06506e-05	-5.04649	4.33764	0.000118134	0.0233172
ENSGALG00000005460	SLCO4A1	chr20	8527860	8554223	+	protein_coding	solute carrier organic anion transporter family member 4A1 [Source:RefSeq peptide;Acc:NP_001265080]	-5.64245	1.50385	0.00183436	0.0341391	-5.84843	1.50388	0.000706124	0.0260411	-0.86399	1.50386	0.515902	0.783251	-0.874609	1.50389	0.722172	0.970642	-0.226264	1.5039	1	1	3.24397	1.50387	0.000697461	0.0290343	-0.516541	1.5039	0.827914	0.992118
ENSGALG00000005524	NTSR1	chr20	8575357	8620192	+	protein_coding	neurotensin receptor type 1 [Source:RefSeq peptide;Acc:NP_001232911]	-1.93472	-0.316426	0.030893	0.1962	-1.93279	-0.316437	0.0311028	0.217065	-0.610913	-0.316427	0.47574	0.759389	-1.92406	-0.316444	0.0375336	0.311056	0.171416	-0.316448	0.759129	0.989688	2.73515	-0.316435	9.48072e-05	0.00702151	-0.519289	-0.316447	0.697224	0.979226
ENSGALG00000005932	MYT1	chr20	9447729	9504782	-	protein_coding	myelin transcription factor 1 [Source:HGNC Symbol;Acc:HGNC:7622]	-6.34438	2.05964	0.00159833	0.0314977	-3.27735	2.05963	0.104149	0.414998	-6.70338	2.05964	8.74058e-07	5.49285e-05	0.956675	2.05963	0.330443	0.822419	-6.32048	2.05963	0.00173692	0.10301	4.60874	2.05963	9.52842e-07	0.000162843	-6.57629	2.05963	0.000111776	0.0227019
ENSGALG00000006106		chr20	9998639	10003173	-	protein_coding	Uncharacterized protein [Source:UniProtKB/TrEMBL;Acc:F1NCY6]	-3.41304	0.0847139	0.00757092	0.0831341	-3.40951	0.0847201	0.00741324	0.0948148	-3.43718	0.0847145	0.000325526	0.00589395	-3.39809	0.0847236	0.00922122	0.147235	-3.40843	0.0847258	0.0083878	0.184532	4.09751	0.084719	5.84719e-07	0.000110733	0.622786	0.0847255	0.43629	0.940597
ENSGALG00000006662	BPIFB3	chr20	10633103	10644913	+	protein_coding	Ovocalyxin-36 precursor [Source:RefSeq peptide;Acc:NP_001026032]	-7.29287	3.07437	4.94961e-05	0.00248616	-7.4848	3.07437	2.68703e-05	0.00265183	-2.00367	3.07437	0.0744216	0.289626	-0.0628631	3.07437	0.872335	0.989901	-2.264	3.07437	0.159572	0.728363	4.45864	3.07437	3.42975e-08	1.00134e-05	-2.28707	3.07437	0.105856	0.619402
ENSGALG00000006666	BPIFB7	chr20	10643158	10647278	-	protein_coding	protein TENP [Source:RefSeq peptide;Acc:NP_990357]	-7.98773	4.1999	0.00010937	0.00461659	-8.64011	4.1999	2.15861e-05	0.00224079	-3.56635	4.1999	0.00576786	0.0508689	0.119643	4.19989	0.749412	0.974676	-2.78839	4.19989	0.118382	0.650844	4.85439	4.1999	1.38464e-08	4.51262e-06	-2.64522	4.19989	0.0900015	0.578304
ENSGALG00000006775	TGM2	chr20	10714657	10723053	+	protein_coding	protein-glutamine gamma-glutamyltransferase 2 [Source:RefSeq peptide;Acc:NP_990779]	0.20316	2.0085	0.704942	0.919817	-1.18571	2.00849	0.509569	0.837272	-2.96921	2.0085	0.0146752	0.098401	0.0724063	2.00848	0.780094	0.977564	0.53223	2.00847	0.507798	0.961237	-6.457	2.00849	0.000300289	0.016265	2.2294	2.00848	0.0119297	0.185965
ENSGALG00000020972		chr20	10822144	10823498	-	protein_coding	Uncharacterized protein [Source:UniProtKB/TrEMBL;Acc:F1NPR2]	0.558266	0.336042	0.460666	0.807859	1.22239	0.336029	0.140912	0.485313	0.489018	0.33604	0.475902	0.759427	-0.152689	0.336022	1	1	-0.945015	0.336017	0.528015	0.966763	-3.97903	0.336031	0.00151384	0.047674	-0.85735	0.336018	0.509045	0.955982
ENSGALG00000007211	CDH22	chr20	10990502	11029175	-	protein_coding	cadherin 22, type 2 [Source:HGNC Symbol;Acc:HGNC:13251]	-2.95786	-0.0693284	0.00803429	0.0864767	-0.263318	-0.0693372	1	1	-0.127964	-0.0693293	0.985037	1	-1.71057	-0.0693421	0.220791	0.717046	-2.4063	-0.0693452	0.0676184	0.503383	3.28957	-0.0693356	2.62012e-05	0.00268018	-2.99494	-0.0693448	0.00246716	0.0776187
ENSGALG00000007772	CBLN4	chr20	12452387	12456928	+	protein_coding	cerebellin-4 precursor [Source:RefSeq peptide;Acc:NP_001072955]	-6.99818	2.4608	4.33759e-05	0.00224503	-2.90441	2.4608	0.0879081	0.376687	-1.34557	2.4608	0.245117	0.562588	-4.06228	2.46079	0.0268384	0.25921	-1.65818	2.46079	0.328135	0.900938	3.49999	2.4608	6.78606e-05	0.00552906	0.600195	2.46079	0.460393	0.943891
ENSGALG00000000479	PADI3	chr21	129323	135282	-	protein_coding	protein-arginine deiminase type-3 [Source:RefSeq peptide;Acc:NP_990374]	-3.75222	0.21053	0.00620197	0.073451	-3.74822	0.210593	0.00603933	0.0843328	-0.0969755	0.210536	1	1	-3.73615	0.210629	0.00753189	0.13277	-3.39199	0.210652	0.0285029	0.321093	4.27639	0.210582	4.73985e-07	9.35552e-05	-3.6198	0.210648	0.00502315	0.114463
ENSGALG00000021714	PADI1	chr21	138391	148124	-	protein_coding	Peptidylarginine deiminase type I [Source:UniProtKB/TrEMBL;Acc:E1C0W6]	-4.92977	0.859812	0.00152752	0.0308898	-3.79906	0.859804	0.0288147	0.208881	-1.26507	0.859812	0.301399	0.62062	-4.91361	0.8598	0.00199361	0.0678117	1.21245	0.859797	0.204678	0.797948	3.17897	0.859806	0.00060816	0.0266336	-1.34847	0.859797	0.39211	0.921087
ENSGALG00000027476	PLEKHG5	chr21	588597	598764	+	protein_coding	pleckstrin homology domain containing, family G (with RhoGef domain) member 5 [Source:HGNC Symbol;Acc:HGNC:29105]	-3.54544	0.308437	0.00815953	0.0867584	-0.914131	0.308419	0.577166	0.86897	-2.57824	0.308435	0.00948201	0.072503	1.80549	0.30841	0.0392837	0.317238	-3.39686	0.308404	0.0209999	0.276822	2.98519	0.308423	0.000251437	0.0144412	-3.81703	0.308405	0.000979442	0.0525842
ENSGALG00000001534	TMEM88	chr21	2204304	2207313	-	protein_coding	transmembrane protein 88 [Source:HGNC Symbol;Acc:HGNC:32371]	-1.23973	-0.420784	0.115308	0.42335	-1.23801	-0.420782	0.11621	0.437109	0.443616	-0.420784	0.449068	0.741253	-1.23073	-0.420781	0.132879	0.58469	-1.23586	-0.42078	0.12472	0.664574	2.38644	-0.420782	0.000130429	0.00914537	-1.26404	-0.42078	0.0632202	0.484135
ENSGALG00000001857	FAM132A	chr21	2478212	2493408	+	protein_coding	family with sequence similarity 132, member A [Source:HGNC Symbol;Acc:HGNC:32308]	2.56484	3.67739	0.00306068	0.0476054	0.209318	3.6774	0.702301	0.921285	-1.79732	3.67739	0.0999425	0.344413	1.07222	3.6774	0.231566	0.730095	-2.38636	3.6774	0.130356	0.675594	-7.88277	3.67739	3.76443e-05	0.00363826	-1.36021	3.6774	0.323674	0.88975
ENSGALG00000026875	PERM1	chr21	2847289	2856043	+	protein_coding	PPARGC1 and ESRR induced regulator, muscle 1 [Source:HGNC Symbol;Acc:HGNC:28208]	0.354826	1.38823	0.607157	0.885337	0.110604	1.38822	0.766097	0.946421	-1.49399	1.38823	0.171055	0.465656	-0.479534	1.38821	0.867961	0.989901	1.71515	1.3882	0.0571669	0.459321	-5.67502	1.38822	0.000367272	0.0188533	0.463255	1.3882	0.536576	0.962455
ENSGALG00000002121	PLEKHN1	chr21	2854550	2865854	-	protein_coding	pleckstrin homology domain containing, family N member 1 [Source:HGNC Symbol;Acc:HGNC:25284]	-0.0102804	1.91811	1	1	0.289355	1.91809	0.651414	0.900449	-1.2435	1.91811	0.267732	0.589255	-0.240019	1.91809	1	1	1.75211	1.91808	0.0563778	0.456556	-6.34738	1.9181	0.000200985	0.0122996	0.287369	1.91808	0.658394	0.976745
ENSGALG00000003016	MASP2	chr21	4073317	4086699	-	protein_coding	mannan-binding lectin serine protease 2 precursor [Source:RefSeq peptide;Acc:NP_998752]	-0.759937	1.01256	0.703679	0.919059	1.8409	1.01256	0.0491095	0.280334	-1.65028	1.01256	0.150415	0.436375	1.97133	1.01256	0.0377641	0.311407	-0.264739	1.01257	1	1	-5.15481	1.01256	0.00150298	0.0474385	-2.15537	1.01257	0.136383	0.684869
ENSGALG00000000317	NEFM	chr22	953202	957709	-	protein_coding	neurofilament medium polypeptide [Source:RefSeq peptide;Acc:NP_001095200]	0.647693	6.23999	0.299299	0.685132	-1.85719	6.23999	0.0485214	0.278451	-0.888245	6.23999	0.186387	0.487955	1.1386	6.23999	0.0800845	0.459396	-3.33029	6.23999	0.00104698	0.0877055	2.00129	6.23999	0.00126993	0.0418747	-2.10446	6.23999	0.0136367	0.20163
ENSGALG00000000365	NKX2-6	chr22	1163640	1164119	+	protein_coding	homeobox protein Nkx-2.6 [Source:RefSeq peptide;Acc:NP_990468]	2.67428	2.64767	0.00227	0.0394198	1.2483	2.64769	0.168835	0.530862	-1.48477	2.64767	0.18109	0.479525	0.0831364	2.6477	0.778295	0.977535	-1.91389	2.6477	0.235174	0.833517	-7.20191	2.64768	5.14149e-05	0.0045033	-5.68414	2.6477	0.000310526	0.0359484
ENSGALG00000018631		chr22	1692477	1716813	+	protein_coding	Uncharacterized protein [Source:UniProtKB/TrEMBL;Acc:F1NA66]	-1.06598	-0.440612	0.157877	0.502039	-1.06391	-0.440604	0.159428	0.516105	-1.15901	-0.440611	0.0190973	0.118578	1.23081	-0.440599	0.0739833	0.438023	-1.06263	-0.440596	0.169725	0.746086	2.13037	-0.440605	0.000585575	0.0258058	-1.08819	-0.440597	0.0925639	0.586168
ENSGALG00000013528		chr22	2867289	2901924	-	protein_coding	Tetraspanin [Source:UniProtKB/TrEMBL;Acc:H9L0Y0]	-0.526436	1.64737	0.85028	0.963607	0.228942	1.64736	0.687069	0.916341	-0.723898	1.64737	0.57053	0.816691	1.89631	1.64735	0.0515545	0.364707	-2.46369	1.64735	0.159893	0.728363	-6.01411	1.64736	0.000750499	0.0303974	0.880767	1.64735	0.318051	0.888381
ENSGALG00000000678	CITED4	chr23	1392832	1394720	+	protein_coding	Cbp/p300-interacting transactivator 3 [Source:UniProtKB/Swiss-Prot;Acc:Q9I8K7]	-1.07667	4.51873	0.410015	0.775224	-2.8426	4.51873	0.0346692	0.229068	-1.34484	4.51873	0.142935	0.424024	-1.3181	4.51873	0.333523	0.822747	-3.07772	4.51872	0.0236034	0.29122	3.00064	4.51873	6.62818e-05	0.00546396	0.630202	4.51873	0.385891	0.917917
ENSGALG00000013409		chr23	2028529	2029895	+	protein_coding	Uncharacterized protein [Source:UniProtKB/TrEMBL;Acc:F1NHB8]	-1.65083	0.182388	0.130049	0.451081	2.08981	0.182371	0.00302613	0.0592917	0.641732	0.182387	0.296442	0.615657	-3.63362	0.182361	0.000330844	0.0265637	0.0857418	0.182354	0.810256	0.991713	-3.63568	0.182374	0.000447444	0.0208322	-0.604088	0.182355	0.55947	0.965682
ENSGALG00000011902	TAGLN	chr24	5229236	5232028	+	protein_coding	Transgelin [Source:UniProtKB/Swiss-Prot;Acc:P19966]	2.07947	5.04109	0.00164056	0.0319762	2.58593	5.0411	5.894e-05	0.00475413	-2.83554	5.04109	0.000397406	0.00680007	-1.25256	5.0411	0.244449	0.746505	-1.98733	5.0411	0.0589039	0.467164	-4.54851	5.0411	0.000202753	0.0123538	-3.25451	5.0411	0.00115549	0.0556038
ENSGALG00000013234	HAPLN2	chr25	508028	510241	-	protein_coding	hyaluronan and proteoglycan link protein 2 [Source:HGNC Symbol;Acc:HGNC:17410]	-5.19495	1.02642	0.000227841	0.00788385	-1.1096	1.02644	0.494123	0.829559	3.95965	1.02642	2.72919e-08	2.69344e-06	-5.17854	1.02646	0.000354492	0.0275992	-0.816002	1.02647	0.640348	0.980375	-5.18253	1.02644	0.00058428	0.0258058	-2.54576	1.02646	0.0587243	0.464164
ENSGALG00000024272		chr25	734441	740904	+	protein_coding	Protein MRP-126 [Source:UniProtKB/Swiss-Prot;Acc:P28318]	-1.51921	-0.38399	0.0637433	0.299764	-1.51755	-0.383994	0.0642743	0.321119	-1.26597	-0.383991	0.0648274	0.267755	-1.50972	-0.383997	0.0753763	0.44267	-0.488315	-0.383998	0.703116	0.98509	2.13992	-0.383994	0.00165078	0.0497506	1.08713	-0.383998	0.106844	0.621083
ENSGALG00000025817	NHLH1	chr25	1195012	1199650	+	protein_coding	helix-loop-helix protein 1 [Source:RefSeq peptide;Acc:NP_989452]	-7.52344	4.6806	2.40985e-05	0.00140131	-3.56677	4.68059	0.0210504	0.177711	-5.07341	4.68059	1.69998e-05	0.000643878	1.10806	4.68059	0.200449	0.693547	-7.32465	4.68059	4.12513e-05	0.0168515	4.03215	4.68059	1.92119e-07	4.56331e-05	-1.48377	4.68059	0.246558	0.840549
ENSGALG00000000318	CSRP1	chr26	759991	765373	+	protein_coding	Cysteine and glycine-rich protein 1 [Source:UniProtKB/Swiss-Prot;Acc:P67966]	0.665657	4.7256	0.111484	0.416415	1.46916	4.7256	0.000256651	0.01262	-0.263938	4.7256	0.516171	0.783251	-0.502015	4.7256	0.364963	0.840386	-0.0911535	4.7256	0.911867	1	-2.15626	4.7256	0.000196245	0.0121755	-0.816199	4.7256	0.0886373	0.57349
ENSGALG00000000653	CNTN2	chr26	1920859	1944417	+	protein_coding	contactin-2 precursor [Source:RefSeq peptide;Acc:NP_001004395]	-0.765466	3.4662	0.577114	0.869215	-2.40517	3.46621	0.0652385	0.324548	0.455362	3.4662	0.486139	0.766841	-0.773121	3.46621	0.595544	0.937747	-2.21961	3.46621	0.0862462	0.569851	2.55269	3.46621	0.000838653	0.0327319	-1.55826	3.46621	0.167198	0.735749
ENSGALG00000000919	PIGR	chr26	2520032	2531914	-	protein_coding	polymeric immunoglobulin receptor precursor [Source:RefSeq peptide;Acc:NP_001038109]	-1.20073	-0.425421	0.117292	0.426944	-1.19894	-0.425418	0.115414	0.436212	0.393594	-0.425421	0.472211	0.756724	-1.19165	-0.425416	0.135679	0.589665	-1.19694	-0.425415	0.126995	0.666816	2.38805	-0.425419	7.54321e-05	0.00593204	-1.22458	-0.425415	0.0645775	0.489546
ENSGALG00000000371	CRHR1	chr27	2226991	2253136	+	protein_coding	corticotropin-releasing factor receptor 1 precursor [Source:RefSeq peptide;Acc:NP_989652]	-6.31752	1.87951	0.000456036	0.0131507	-6.31337	1.87951	0.000447934	0.0189077	-0.463904	1.87951	0.77005	0.910136	-6.30087	1.87951	0.000632087	0.0376939	-6.31321	1.87951	0.000518841	0.0645105	3.21194	1.87951	0.000878076	0.0335186	0.929252	1.87951	0.313236	0.886684
ENSGALG00000009929	SOST	chr27	3288909	3291885	+	protein_coding	sclerostin [Source:HGNC Symbol;Acc:HGNC:13771]	-1.34029	0.402742	0.314666	0.697932	2.30453	0.402807	0.0042463	0.0707583	-0.667688	0.402748	0.49856	0.774655	-0.282275	0.402843	0.954286	1	0.0875157	0.402866	0.79582	0.991713	-4.14655	0.402795	0.000961936	0.0351057	-0.193423	0.402863	0.966542	1
ENSGALG00000000619	ANGPTL4	chr28	849861	858519	-	protein_coding	angiopoietin-like 4 [Source:HGNC Symbol;Acc:HGNC:16039]	-1.94355	2.05289	0.121424	0.434755	-1.21799	2.05288	0.343465	0.734186	3.20012	2.05289	4.33335e-07	2.9233e-05	-1.7704	2.05288	0.180004	0.666718	-1.40012	2.05288	0.271415	0.870391	-5.25624	2.05288	0.000322203	0.0172342	-1.01545	2.05288	0.371395	0.910555
ENSGALG00000026716	CELF5	chr28	1233711	1264738	+	protein_coding	CUGBP, Elav-like family member 5 [Source:HGNC Symbol;Acc:HGNC:14058]	-0.194148	-0.142255	0.976581	1	0.275743	-0.142247	0.625494	0.889284	-1.2943	-0.142254	0.0876421	0.318191	-1.16471	-0.142243	0.31785	0.81269	-0.976402	-0.14224	0.407015	0.928675	2.35201	-0.142249	0.000744152	0.0303156	-0.766989	-0.14224	0.449387	0.943398
ENSGALG00000001342	HCN2	chr28	2630749	2642551	+	protein_coding	hyperpolarization activated cyclic nucleotide gated potassium channel 2 [Source:HGNC Symbol;Acc:HGNC:4846]	-1.92786	0.336956	0.167777	0.515734	-3.77732	0.336955	0.00385161	0.0672811	1.01502	0.336956	0.175506	0.471767	-3.98229	0.336954	0.00173328	0.0633219	-3.81471	0.336954	0.00424293	0.143217	3.13207	0.336955	0.000106507	0.00769377	-3.61741	0.336954	0.00506826	0.114697
ENSGALG00000008893	SYT4	chrZ	3411089	3422336	+	protein_coding	synaptotagmin IV [Source:HGNC Symbol;Acc:HGNC:11512]	-1.16799	0.315651	0.532007	0.84463	-3.94781	0.315648	0.00574462	0.0815655	-4.11251	0.315651	5.4293e-05	0.001534	1.92872	0.315647	0.0491517	0.354875	-3.94704	0.315646	0.00648691	0.162137	3.16865	0.315649	0.000623007	0.0268774	-3.99168	0.315646	0.00166646	0.0632895
ENSGALG00000013376	CAPSL	chrZ	10767469	10772029	-	protein_coding	calcyphosine-like [Source:HGNC Symbol;Acc:HGNC:28375]	-5.18303	1.02757	7.71551e-05	0.0035335	0.93983	1.02756	0.254818	0.648215	1.87236	1.02757	0.00941207	0.0722348	-1.64304	1.02755	0.264838	0.766317	-0.733081	1.02754	0.645801	0.980375	-5.17041	1.02756	0.000210045	0.0126333	-0.197186	1.02754	0.971341	1
ENSGALG00000014999	MAP1B	chrZ	25184265	25251593	-	protein_coding	microtubule-associated protein 1B [Source:HGNC Symbol;Acc:HGNC:6836]	-0.907809	6.59278	0.177426	0.531291	-0.694454	6.59278	0.309938	0.707416	-0.335045	6.59278	0.517116	0.783981	0.145322	6.59278	0.726156	0.971167	-1.61611	6.59278	0.0205179	0.276213	2.02596	6.59278	2.82642e-05	0.00280918	-0.36218	6.59278	0.570038	0.965682
ENSGALG00000015176	GNA14	chrZ	37568752	37598066	-	protein_coding	guanine nucleotide binding protein (G protein), alpha 14 [Source:HGNC Symbol;Acc:HGNC:4382]	-3.67867	1.35569	0.00516579	0.0658058	-2.84985	1.35569	0.0264385	0.199735	-1.22273	1.35569	0.170595	0.4653	-0.985959	1.35569	0.470314	0.897813	-0.61325	1.35569	0.672895	0.982524	3.28744	1.35569	3.92667e-06	0.000550284	-0.223589	1.35569	0.91874	0.997671
ENSGALG00000015290	LIX1	chrZ	51375633	51406317	+	protein_coding	Protein limb expression 1 [Source:UniProtKB/Swiss-Prot;Acc:Q8UVV7]	0.859438	2.92729	0.277511	0.659814	0.549663	2.92728	0.459825	0.810077	2.05172	2.92729	0.00301802	0.0311922	-2.86163	2.92728	0.0447219	0.336772	-6.30206	2.92728	4.91642e-05	0.0174518	-6.21374	2.92728	9.43364e-05	0.00702151	-1.95629	2.92728	0.0975835	0.600712
ENSGALG00000015433	ABCA1	chrZ	54549996	54642132	-	protein_coding	ATP-binding cassette sub-family A member 1 [Source:RefSeq peptide;Acc:NP_989476]	0.545308	1.92341	0.482438	0.820297	2.38787	1.92339	0.00534196	0.0784815	-1.11565	1.9234	0.290754	0.610372	0.610952	1.92338	0.448419	0.890123	-1.31205	1.92337	0.395573	0.925865	-5.5891	1.92339	0.000977803	0.0354081	-1.91379	1.92337	0.148097	0.701893
ENSGALG00000001840	TEK	chrZ	68386224	68425628	+	protein_coding	TEK tyrosine kinase, endothelial [Source:HGNC Symbol;Acc:HGNC:11724]	-0.514009	2.51779	0.249372	0.627751	3.26058	2.51779	4.03482e-32	5.6544e-28	-0.0763991	2.51779	0.832126	0.93737	-2.22151	2.5178	5.73846e-06	0.00146216	-2.50546	2.5178	1.82245e-07	0.000319247	-2.6454	2.51779	1.17097e-07	2.98363e-05	-2.32001	2.5178	8.47522e-08	0.000131969
ENSGALG00000028063	LOX	chrZ	80799753	80812305	-	protein_coding	protein-lysine 6-oxidase precursor [Source:RefSeq peptide;Acc:NP_990812]	-2.65487	0.148087	0.00793359	0.0859801	-0.538487	0.148086	0.65769	0.903243	-1.54545	0.148087	0.0401454	0.196998	-1.34125	0.148086	0.21808	0.714451	-2.06561	0.148086	0.0424707	0.391826	3.76716	0.148087	4.60089e-11	3.39352e-08	-1.50375	0.148086	0.112324	0.631161
ENSGALG00000005351	PRDM6	chrZ	81208559	81282646	+	protein_coding	PR domain containing 6 [Source:HGNC Symbol;Acc:HGNC:9350]	2.13153	0.251161	2.0562e-05	0.00124205	1.24885	0.251143	0.021045	0.177711	-1.72416	0.251159	0.0023807	0.0263532	-1.34353	0.251132	0.0810694	0.461645	0.349581	0.251126	0.516573	0.96495	-2.62396	0.251146	0.000959214	0.0350977	-2.18067	0.251127	0.00197828	0.0692102
ENSGALG00000007468	HBAA	chr14_AADN03010595_random	5125	5931	-	protein_coding	Gallus gallus hemoglobin, alpha 1 (HBAA), mRNA. [Source:RefSeq mRNA;Acc:NM_001004376]	-2.15086	0.484019	0.0731511	0.326166	-3.88481	0.484006	0.00070585	0.0260411	3.39638	0.484018	5.19189e-09	6.27234e-07	0.683477	0.483999	0.353619	0.834003	-4.28045	0.483994	8.5712e-05	0.0235886	-4.27267	0.484009	0.000168463	0.011136	-4.17217	0.483995	3.17388e-05	0.0109862
ENSGALG00000001227	PIK3R6	chr18_AADN03010810_random	14340	38362	+	protein_coding	phosphoinositide-3-kinase, regulatory subunit 6 [Source:HGNC Symbol;Acc:HGNC:27101]	0.418274	1.55422	0.570295	0.864947	1.98333	1.5542	0.0311301	0.217065	-0.73209	1.55422	0.536951	0.798568	0.101336	1.55419	0.765332	0.975388	-0.182143	1.55418	1	1	-5.89279	1.5542	0.000440433	0.020781	-1.03187	1.55418	0.490196	0.952108
ENSGALG00000017567	GPD1	chrLGE22C19W28_E50C23	290246	294140	-	protein_coding	glycerol-3-phosphate dehydrogenase 1 (soluble) [Source:HGNC Symbol;Acc:HGNC:4455]	-2.50629	-0.195831	0.0176857	0.138385	-0.420338	-0.195832	0.873481	0.977128	-1.92158	-0.195831	0.0262947	0.149007	-2.49321	-0.195833	0.0214044	0.228862	-2.50158	-0.195834	0.0196592	0.270349	4.27395	-0.195832	3.97853e-10	2.065e-07	-2.5413	-0.195834	0.00645162	0.13296
ENSGALG00000024396	NEUROD4	chrLGE22C19W28_E50C23	460147	461139	-	protein_coding	neurogenic differentiation factor 4 [Source:RefSeq peptide;Acc:NP_990407]	-3.14975	-0.00763642	0.00548791	0.0683015	-2.60162	-0.0076424	0.047332	0.273412	-2.44842	-0.007637	0.00893238	0.0694279	0.513496	-0.00764574	0.498823	0.915447	-3.145	-0.00764793	0.00626215	0.161743	3.45218	-0.00764131	8.5527e-06	0.00106069	-0.269676	-0.00764761	0.937747	1
ENSGALG00000010250		chrLGE22C19W28_E50C23	713333	717769	-	protein_coding	Uncharacterized protein [Source:UniProtKB/TrEMBL;Acc:H9KZP6]	-0.32917	4.95831	0.790876	0.945274	1.2713	4.95831	0.0567545	0.300504	-1.13106	4.95831	0.114704	0.374265	1.18627	4.95831	0.0817245	0.463491	0.130199	4.95831	0.762708	0.989688	-3.53622	4.95831	0.00154684	0.048387	-0.196786	4.95831	0.884513	0.995278
ENSGALG00000027082		chrUn_AADN03025011	5833	7119	-	protein_coding	Uncharacterized protein [Source:UniProtKB/TrEMBL;Acc:R4GI17]	-2.00191	-0.191251	0.0303816	0.194414	-1.01541	-0.19126	0.36091	0.74936	-1.85821	-0.191252	0.00972852	0.0735756	-1.88613	-0.191266	0.0712281	0.43044	-1.20356	-0.19127	0.259339	0.858473	3.52412	-0.191259	2.9223e-09	1.17009e-06	-0.473763	-0.191269	0.662128	0.976745
ENSGALG00000028794		chrUn_AADN03025606	47	1673	-	protein_coding	Uncharacterized protein [Source:UniProtKB/TrEMBL;Acc:R4GJ76]	-3.87741	0.283541	0.000137329	0.00548601	1.4347	0.283521	0.0533192	0.291091	0.747496	0.283539	0.23802	0.553877	-3.86242	0.283509	0.000242948	0.0216858	0.974737	0.283502	0.188483	0.776672	-3.86477	0.283524	0.000335154	0.0176573	-0.161139	0.283503	0.96661	1
ENSGALG00000000139		chrUn_AADN03025856	21	1162	+	protein_coding	Uncharacterized protein [Source:UniProtKB/TrEMBL;Acc:F1NT07]	-2.84267	0.416397	0.0131308	0.115009	1.69441	0.416373	0.0244724	0.192636	0.688732	0.416395	0.290505	0.610183	-4.13553	0.416359	0.000193977	0.0191136	0.554881	0.416351	0.436153	0.939692	-4.13816	0.416377	0.000275814	0.0153003	-0.037953	0.416352	1	1
ENSGALG00000026510	FCER2	chrUn_JH375454	245	5080	+	protein_coding	Fc fragment of IgE, low affinity II, receptor for (CD23) [Source:HGNC Symbol;Acc:HGNC:3612]	-2.36258	-0.231115	0.0198933	0.148923	0.893175	-0.231109	0.271554	0.668659	-1.39448	-0.231114	0.142347	0.422906	-0.870169	-0.231106	0.568625	0.93245	-2.11531	-0.231104	0.0576321	0.46075	2.99619	-0.23111	9.63696e-05	0.0070708	-2.39682	-0.231105	0.00745997	0.143802
ENSGALG00000026697		chrUn_JH376350	4513	6872	+	protein_coding	Uncharacterized protein [Source:UniProtKB/TrEMBL;Acc:R4GIW9]	0.201155	1.61807	0.68266	0.912959	1.62593	1.61806	0.00487485	0.0752381	-0.355604	1.61807	0.577629	0.820249	-0.270846	1.61806	0.814976	0.983354	0.490394	1.61806	0.395488	0.925865	-3.70514	1.61806	9.34918e-05	0.00702151	-1.04168	1.61806	0.169369	0.737967
ENSGALG00000028014		chrW_JH375233_random	1410	68137	+	protein_coding	Uncharacterized protein [Source:UniProtKB/TrEMBL;Acc:R4GJZ0]	0.472027	1.36195	0.322797	0.704251	1.443	1.36196	0.00193256	0.0471007	-0.201998	1.36195	0.692343	0.875183	-0.181309	1.36196	0.832458	0.985116	-0.0147886	1.36196	1	1	-2.57287	1.36196	0.000200166	0.0122996	-0.827022	1.36196	0.142378	0.691001
