# Supplementary material for: Single-cell transcriptome analysis of avian neural crest migration reveals signatures of invasion and molecular transitions
Source: eLife. 2017 Dec 4;6:e28415. doi: 10.7554/eLife.28415 (PMC5728719; doi:10.7554/eLife.28415)
Supplement: Figure 8—source data 1. — All differential expression thresholds were set at log2 FC greater than 2 or less than −2 and adjusted p value less than 0.05. Individual comparisons of HH13 and 15 Leader and Trailer subpopulations to all other cells isolated in vivo are displayed as individual tabs within the spreadsheet. [file elife-28415-fig8-data1.xlsx]

## Sheet: Sheet1
gene name	Ensembl ID	MO 5-3	target site
PKP2	ENSGALT00000021059	GCAACCTGTCCAAGAGTGTGTAAGA	E3I3 splice junction	FORWARD PRIMER
				exon	sequence
				1	CGCCGCCTAAAGCTGAG
				REVERSE PRIMER
				exon	sequence
				2	AACCATACTGAGATCTTGGTGAAA
				FORWARD PRIMER
				exon	sequence
				2	GTGTCCCAGAACGTGTCTATAA
				REVERSE PRIMER
				exon	sequence
				4	TTCTTCTGGCTTCTGCTTTCT
EDN1	ENSGALT00000020785	GTAGCAACAATAGACGCACCAGAGA	E3I3 splice junction	FORWARD PRIMER
				exon	sequence
				1	ATTGCAGCCGCCTGTTC
				REVERSE PRIMER
				exon	sequence
				2	GGTGTTGATCCAGATGATATCCAG
				FORWARD PRIMER
				exon	sequence
				2	GACGAGGAGTGCGTGTATTT
				REVERSE PRIMER
				exon	sequence
				4	AACTGTTGGTTCATGCATTTAGG
ANXA1	ENSGALT00000032821	ATCTACACCTACAGATTACCAAACA	I3E4 splice junction	FORWARD PRIMER
				exon	sequence
				2	AGAATTTCTGAAACAGGCATGG
				REVERSE PRIMER
				exon	sequence
				3	GATCAAAGTTTGGGCGTGAC
				FORWARD PRIMER
				exon	sequence
				3	CGGCTGATGTTTCTGCTTTG
				REVERSE PRIMER
				exon	sequence
				5	AGAGGCCCTTAATTCTTCAGC
