# Supplementary material for: Single-cell transcriptome analysis of avian neural crest migration reveals signatures of invasion and molecular transitions
Source: eLife journal article supplement (doi:10.7554/elife.28415), 2017-12-04
Supplement: supp [file elife_poa_e28415_Transparent_Reporting_File.docx]

***eLife’s* transparent reporting form**

We encourage authors to provide detailed information *within their submission* to facilitate the interpretation and replication of experiments. If you have any questions, please contact us: [editorial@elifesciences.org](mailto:editorial@elifesciences.org).

**Sample-size estimation**

- You should state whether an appropriate sample size was computed when the study was being designed
- You should state the statistical method of sample size computation and any required assumptions
- If no explicit power analysis was used, you should describe how you decided what sample (replicate) size (number) to use

Please outline where this information can be found within the submission (e.g., page numbers or figure legends), or explain why this information doesn’t apply to your submission:

For bulk RNAseq, 3 replicates were performed for each subpopulation, shown in figure 1, and methods. For single cell RNA seq, n values (number of embryos and cells) are shown in figure 2. N values for embryo perturbations are shown in Figure 6 figure legend.

We isolated a minimum of 50 single cells per condition for scRNAseq. This was based upon previous single RTqPCR work (McLennan DEV 2015), and assumed that subpopulations that represent more than 10% (more than 5 cells) of a condition could be confidently segregated and not determined to be outliers.

**Replicates**

- You should report how often each experiment was performed
- You should include a definition of biological versus technical replication
- The data obtained should be provided and sufficient information should be provided to indicate the number of independent biological and/or technical replicates
- If you encountered any outliers, you should describe how these were handled
- Criteria for exclusion/inclusion of data should be clearly stated
- High-throughput sequence data should be uploaded before submission, with a private link for reviewers provided (these are available from both GEO and ArrayExpress)

Please outline where this information can be found within the submission (e.g., page numbers or figure legends), or explain why this information doesn’t apply to your submission:

For bulk RNAseq, 3 replicates were performed for each subpopulation, shown in figure 1, and methods. These were biological replicates as each were isolated from different embryos. For single cell RNA-seq, there are not replicates as it is an analysis of single cells. When comparing mean values per condition, each single cell is taken to be a biological replicate. Outliers were removed from single cell data based on low read counts or potential cell doublets, as shown in figure 2.

**Statistical reporting**

- Statistical analysis methods should be described and justified
- Raw data should be presented in figures whenever informative to do so (typically when N per group is less than 10)
- For each experiment, you should identify the statistical tests used, exact values of N, definitions of center, methods of multiple test correction, and dispersion and precision measures (e.g., mean, median, SD, SEM, confidence intervals; and, for the major substantive results, a measure of effect size (e.g., Pearson's r, Cohen's d)
- Report exact p-values wherever possible alongside the summary statistics and 95% confidence intervals. These should be reported for all key questions and not only when the p-value is less than 0.05.

Computational analysis used is discussed in methods and supplementary file. N values are in figure legends. P values are in figures or figure legends.

Please outline where this information can be found within the submission (e.g., page numbers or figure legends), or explain why this information doesn’t apply to your submission:

(For large datasets, or papers with a very large number of statistical tests, you may upload a single table file with tests, Ns, etc., with reference to page numbers in the manuscript.)

**Additional data files (“source data”)**

- We encourage you to upload relevant additional data files, such as numerical data that are represented as a graph in a figure, or as a summary table
- Where provided, these should be in the most useful format, and they can be uploaded as “Source data” files linked to a main figure or table
- Include model definition files including the full list of parameters used
- Include code used for data analysis (e.g., R, MatLab)
- Avoid stating that data files are “available upon request”

Please indicate the figures or tables for which source data files have been provided:

Source data files provide additional data for what is shown in figures 1-8.
